# Supplementary material for: Human contamination in bacterial genomes has created thousands of spurious proteins
Source: HighWire-hosted journal article supplement (doi:10.1101/gr.245373.118), 2019-05-07
Supplement: Supplemental_Table_S1.xlsx [file Supplemental_Table_S1.xlsx]

## Sheet: Sheet1
qseqid	Profile1	SequenceAccession	Profile	ProfileAlnLen	SequenceLen	SequenceFrom	SequenceTo	ProfileEvalue	ProfileScore	ProfileBias	SequenceDescription	Proteins	AssemblyName	OrganismName	InfraspecificName	Taxid	BioSample	BioProject	Submitter	Date	AssemblyType	ReleaseType	AssemblyLevel	GenomeRepresentation	AssemblyMethod	GenomeCoverage	SequencingTechnology	RefSeqCategory	GenBankAssemblyAccession	RefSeqAssemblyAccession	RefSeqAssemblyAndGenBankAssembliesIdentical	0HumanSeqId	HumanPercId	HumanAlnLen	HumanEvalue	HumanBitScore	Domain
NZ_AACK01000131.1:1-104	Alu	NZ_AACK01000131.1	AluSx	102	282	104	1	1.2e-20	80.5	10.2	Actinobacillus pleuropneumoniae serovar 1 str. 4074 Apleuro.Contig44, whole genome shotgun sequence		ASM16709v1	Actinobacillus pleuropneumoniae serovar 1 str. 4074 (g-proteobacteria)	strain=4074	228399	SAMN02471910	PRJNA198	Univ. Oklahoma	2003-4-21	n/a	major	Scaffold	full					GCA_000167095.1	GCF_000167095.1	yes	NC_000021.9	100	104	1.77e-47	193	bacteria
NZ_AAPV01000005.1:1-1011	LINE	NZ_AAPV01000005.1	L1P1_orf2	998	1055	1011	1	8.2e-247	826.6	120.9	Candidatus Pelagibacter ubique HTCC1002 1099314759145, whole genome shotgun sequence		ASM15352v1	Candidatus Pelagibacter ubique HTCC1002 (a-proteobacteria)	strain=HTCC1002	314261	SAMN02436088	PRJNA13577	The Gordon and Betty Moore Foundation Marine Microbiology Initiative	2006-5-2	n/a	major	Scaffold	full					GCA_000153525.1	GCF_000153525.1	yes	NC_000007.14	99.758	826	0	1515	bacteria
NZ_AAVT01000030.1:526-694	LTR	NZ_AAVT01000030.1	THE1-int	125	1388	526	694	3.8e-28	102.1	6.7	Marine gamma proteobacterium HTCC2143 1100111000165, whole genome shotgun sequence	WP_077627238.1;WP_080544242.1	ASM16907v1	marine gamma proteobacterium HTCC2143 (g-proteobacteria)	strain=HTCC2143	247633	SAMN02436155	PRJNA13605	The Gordon and Betty Moore Foundation Marine Microbiology Initiative	2006-12-15	n/a	major	Contig	full					GCA_000169075.1	GCF_000169075.1	yes	NC_000008.11	99.206	126	8.9e-58	228	bacteria
NZ_AAXW01000147.1:256-1175	LINE	NZ_AAXW01000147.1	L1HS_3end	900	1625	1175	256	0	1134.8	53.5	Cyanothece sp. CCY0110 1101676644431, whole genome shotgun sequence	WP_035800930.1	ASM16933v1	Cyanothece sp. CCY0110 (cyanobacteria)	strain=CCY0110	391612	SAMN02436157	PRJNA18951	The Gordon and Betty Moore Foundation Marine Microbiology Initiative	2007-3-6	n/a	major	Contig	full					GCA_000169335.1	GCF_000169335.1	yes	NW_003315969.2	98.588	921	0	1628	bacteria
NZ_AAXW01000147.1:9-172	Alu	NZ_AAXW01000147.1	AluY	147	1625	9	172	7.9e-38	137.3	8.3	Cyanothece sp. CCY0110 1101676644431, whole genome shotgun sequence	WP_035800930.1	ASM16933v1	Cyanothece sp. CCY0110 (cyanobacteria)	strain=CCY0110	391612	SAMN02436157	PRJNA18951	The Gordon and Betty Moore Foundation Marine Microbiology Initiative	2007-3-6	n/a	major	Contig	full					GCA_000169335.1	GCF_000169335.1	yes	NC_000003.12	97.561	164	8.41e-73	278	bacteria
NZ_AAXW01000149.1:1109-1278	HSATII	NZ_AAXW01000149.1	HSATII	169	1513	1109	1278	1.6e-41	148.9	14	Cyanothece sp. CCY0110 1101676644430, whole genome shotgun sequence	WP_035800933.1;WP_008278997.1	ASM16933v1	Cyanothece sp. CCY0110 (cyanobacteria)	strain=CCY0110	391612	SAMN02436157	PRJNA18951	The Gordon and Betty Moore Foundation Marine Microbiology Initiative	2007-3-6	n/a	major	Contig	full					GCA_000169335.1	GCF_000169335.1	yes	NC_000016.10	98.235	170	6.74e-79	298	bacteria
NZ_AAXW01000149.1:126-292	HSATII	NZ_AAXW01000149.1	HSATII	169	1513	126	292	8.9e-40	143.2	9.2	Cyanothece sp. CCY0110 1101676644430, whole genome shotgun sequence	WP_035800933.1;WP_008278997.1	ASM16933v1	Cyanothece sp. CCY0110 (cyanobacteria)	strain=CCY0110	391612	SAMN02436157	PRJNA18951	The Gordon and Betty Moore Foundation Marine Microbiology Initiative	2007-3-6	n/a	major	Contig	full					GCA_000169335.1	GCF_000169335.1	yes	NC_000016.10	98.204	167	3.07e-77	292	bacteria
NZ_AAXW01000149.1:1396-1512	HSATII	NZ_AAXW01000149.1	HSATII	115	1513	1396	1512	3e-21	82.9	12.9	Cyanothece sp. CCY0110 1101676644430, whole genome shotgun sequence	WP_035800933.1;WP_008278997.1	ASM16933v1	Cyanothece sp. CCY0110 (cyanobacteria)	strain=CCY0110	391612	SAMN02436157	PRJNA18951	The Gordon and Betty Moore Foundation Marine Microbiology Initiative	2007-3-6	n/a	major	Contig	full					GCA_000169335.1	GCF_000169335.1	yes	NC_000016.10	99.138	116	2.04e-52	209	bacteria
NZ_AAXW01000149.1:394-566	HSATII	NZ_AAXW01000149.1	HSATII	169	1513	394	566	9.8e-45	159.4	14.3	Cyanothece sp. CCY0110 1101676644430, whole genome shotgun sequence	WP_035800933.1;WP_008278997.1	ASM16933v1	Cyanothece sp. CCY0110 (cyanobacteria)	strain=CCY0110	391612	SAMN02436157	PRJNA18951	The Gordon and Betty Moore Foundation Marine Microbiology Initiative	2007-3-6	n/a	major	Contig	full					GCA_000169335.1	GCF_000169335.1	yes	NC_000016.10	97.688	173	6.88e-79	298	bacteria
NZ_AAXW01000149.1:660-813	HSATII	NZ_AAXW01000149.1	HSATII	152	1513	660	813	2.5e-33	122.2	16.6	Cyanothece sp. CCY0110 1101676644430, whole genome shotgun sequence	WP_035800933.1;WP_008278997.1	ASM16933v1	Cyanothece sp. CCY0110 (cyanobacteria)	strain=CCY0110	391612	SAMN02436157	PRJNA18951	The Gordon and Betty Moore Foundation Marine Microbiology Initiative	2007-3-6	n/a	major	Contig	full					GCA_000169335.1	GCF_000169335.1	yes	NC_000016.10	99.351	154	2.17e-73	279	bacteria
NZ_AAXW01000149.1:841-1010	HSATII	NZ_AAXW01000149.1	HSATII	169	1513	841	1010	5e-47	166.9	16.2	Cyanothece sp. CCY0110 1101676644430, whole genome shotgun sequence	WP_035800933.1;WP_008278997.1	ASM16933v1	Cyanothece sp. CCY0110 (cyanobacteria)	strain=CCY0110	391612	SAMN02436157	PRJNA18951	The Gordon and Betty Moore Foundation Marine Microbiology Initiative	2007-3-6	n/a	major	Contig	full					GCA_000169335.1	GCF_000169335.1	yes	NC_000016.10	97.647	170	3.13e-77	292	bacteria
NZ_AAZP01000219.1:214-383	Sat	NZ_AAZP01000219.1	ALR	168	1103	214	383	8.3e-40	144	3.9	Burkholderia mallei PRL-20 gcontig_1105338602062, whole genome shotgun sequence		ASM16987v1	Burkholderia mallei PRL-20 (b-proteobacteria)	strain=PRL-20	436115	SAMN02435865	PRJNA19147	TIGR	2007-8-15	n/a	major	Contig	full					GCA_000169875.1	GCF_000169875.1	yes	NC_000018.10	100	170	6.69e-84	315	bacteria
NZ_AAZP01000219.1:384-550	Sat	NZ_AAZP01000219.1	ALR	169	1103	384	550	9.7e-33	121	10.5	Burkholderia mallei PRL-20 gcontig_1105338602062, whole genome shotgun sequence		ASM16987v1	Burkholderia mallei PRL-20 (b-proteobacteria)	strain=PRL-20	436115	SAMN02435865	PRJNA19147	TIGR	2007-8-15	n/a	major	Contig	full					GCA_000169875.1	GCF_000169875.1	yes	NC_000018.10	100	167	3.05e-82	309	bacteria
NZ_AAZP01000219.1:47-213	Sat	NZ_AAZP01000219.1	ALR	170	1103	47	213	2e-33	123.3	5	Burkholderia mallei PRL-20 gcontig_1105338602062, whole genome shotgun sequence		ASM16987v1	Burkholderia mallei PRL-20 (b-proteobacteria)	strain=PRL-20	436115	SAMN02435865	PRJNA19147	TIGR	2007-8-15	n/a	major	Contig	full					GCA_000169875.1	GCF_000169875.1	yes	NC_000018.10	100	167	3.05e-82	309	bacteria
NZ_AAZP01000219.1:551-721	Sat	NZ_AAZP01000219.1	ALR	168	1103	551	721	1.5e-41	149.8	5.1	Burkholderia mallei PRL-20 gcontig_1105338602062, whole genome shotgun sequence		ASM16987v1	Burkholderia mallei PRL-20 (b-proteobacteria)	strain=PRL-20	436115	SAMN02435865	PRJNA19147	TIGR	2007-8-15	n/a	major	Contig	full					GCA_000169875.1	GCF_000169875.1	yes	NC_000018.10	100	171	1.87e-84	316	bacteria
NZ_AAZP01000219.1:722-892	Sat	NZ_AAZP01000219.1	ALR	170	1103	722	892	3.1e-44	158.5	7.7	Burkholderia mallei PRL-20 gcontig_1105338602062, whole genome shotgun sequence		ASM16987v1	Burkholderia mallei PRL-20 (b-proteobacteria)	strain=PRL-20	436115	SAMN02435865	PRJNA19147	TIGR	2007-8-15	n/a	major	Contig	full					GCA_000169875.1	GCF_000169875.1	yes	NC_000018.10	100	171	1.87e-84	316	bacteria
NZ_AAZP01000219.1:893-1063	Sat	NZ_AAZP01000219.1	ALR	170	1103	893	1063	1.6e-46	165.9	3.4	Burkholderia mallei PRL-20 gcontig_1105338602062, whole genome shotgun sequence		ASM16987v1	Burkholderia mallei PRL-20 (b-proteobacteria)	strain=PRL-20	436115	SAMN02435865	PRJNA19147	TIGR	2007-8-15	n/a	major	Contig	full					GCA_000169875.1	GCF_000169875.1	yes	NC_000018.10	100	171	1.87e-84	316	bacteria
NZ_ABAZ01000308.1:1-116	LINE	NZ_ABAZ01000308.1	L1P1_orf2	113	116	1	116	2.6e-25	91.5	25.5	Francisella tularensis subsp. holarctica URFT1 contig00308, whole genome shotgun sequence		ASM17029v1	Francisella tularensis subsp. holarctica URFT1 (g-proteobacteria)	strain=URFT1	445226	SAMN02471335	PRJNA19645	Unite des Rickettsies, CNRS	2009-9-3	n/a	major	Contig	full					GCA_000170295.1	GCF_000170295.1	yes	NC_000001.11	99.138	116	7.24e-52	207	bacteria
NZ_ABDQ01000075.1:1-85	Alu	NZ_ABDQ01000075.1	AluJo	80	363	85	1	3.8e-15	62.3	2.1	Clostridium botulinum C str. Eklund gcontig_1106103629380, whole genome shotgun sequence		ASM17109v1	Clostridium botulinum C str. Eklund (firmicutes)	strain=Eklund	445337	SAMN02436293	PRJNA20017	J. Craig Venter Institute	2007-7-11	n/a	major	Contig	full					GCA_000171095.1	GCF_000171095.1	yes	NC_000010.11	100	82	2.27e-35	152	bacteria
NZ_ABGO01000603.1:1085-1401	Alu	NZ_ABGO01000603.1	AluSz	309	2022	1401	1085	7.5e-88	301.5	3.3	Gemmata obscuriglobus UQM 2246 gcontig_1106221712325, whole genome shotgun sequence		ASM17177v1	Gemmata obscuriglobus UQM 2246 (planctomycetes)	strain=UQM 2246	214688	SAMN02436172	PRJNA20997	J. Craig Venter Institute	2007-10-23	n/a	major	Contig	full				Representative Genome	GCA_000171775.1	GCF_000171775.1	yes	NC_000020.11	91.693	313	6.01e-117	425	bacteria
NZ_ABGO01000603.1:1-94	Alu	NZ_ABGO01000603.1	AluY	84	2022	94	1	1.2e-23	90.7	3.6	Gemmata obscuriglobus UQM 2246 gcontig_1106221712325, whole genome shotgun sequence		ASM17177v1	Gemmata obscuriglobus UQM 2246 (planctomycetes)	strain=UQM 2246	214688	SAMN02436172	PRJNA20997	J. Craig Venter Institute	2007-10-23	n/a	major	Contig	full				Representative Genome	GCA_000171775.1	GCF_000171775.1	yes	NC_000020.11	100	94	5.59e-42	174	bacteria
NZ_ABGO01000668.1:109-1203	LINE	NZ_ABGO01000668.1	L1HS_5end	1085	1203	109	1203	0	1356.9	34	Gemmata obscuriglobus UQM 2246 gcontig_1106221704897, whole genome shotgun sequence		ASM17177v1	Gemmata obscuriglobus UQM 2246 (planctomycetes)	strain=UQM 2246	214688	SAMN02436172	PRJNA20997	J. Craig Venter Institute	2007-10-23	n/a	major	Contig	full				Representative Genome	GCA_000171775.1	GCF_000171775.1	yes	NC_000020.11	100	1095	0	2023	bacteria
NZ_ABGO01000704.1:174-432	Alu	NZ_ABGO01000704.1	AluSx	249	956	432	174	7.6e-73	252.2	3.4	Gemmata obscuriglobus UQM 2246 gcontig_1106221719957, whole genome shotgun sequence		ASM17177v1	Gemmata obscuriglobus UQM 2246 (planctomycetes)	strain=UQM 2246	214688	SAMN02436172	PRJNA20997	J. Craig Venter Institute	2007-10-23	n/a	major	Contig	full				Representative Genome	GCA_000171775.1	GCF_000171775.1	yes	NC_000020.11	98.785	247	2.22e-120	436	bacteria
NZ_ABGO01000756.1:1-785	LINE	NZ_ABGO01000756.1	L1P1_orf2	778	785	1	785	4.3e-270	903.9	76.5	Gemmata obscuriglobus UQM 2246 gcontig_1106221706095, whole genome shotgun sequence		ASM17177v1	Gemmata obscuriglobus UQM 2246 (planctomycetes)	strain=UQM 2246	214688	SAMN02436172	PRJNA20997	J. Craig Venter Institute	2007-10-23	n/a	major	Contig	full				Representative Genome	GCA_000171775.1	GCF_000171775.1	yes	NC_000020.11	99.49	785	0	1424	bacteria
NZ_ABGO01000766.1:360-589	LTR	NZ_ABGO01000766.1	MIR	253	774	589	360	4.3e-25	95.9	1.1	Gemmata obscuriglobus UQM 2246 gcontig_1106221704079, whole genome shotgun sequence		ASM17177v1	Gemmata obscuriglobus UQM 2246 (planctomycetes)	strain=UQM 2246	214688	SAMN02436172	PRJNA20997	J. Craig Venter Institute	2007-10-23	n/a	major	Contig	full				Representative Genome	GCA_000171775.1	GCF_000171775.1	yes	NC_000003.12	100	230	4.21e-117	425	bacteria
NZ_ABGO01000777.1:134-429	LTR	NZ_ABGO01000777.1	MIR	258	752	134	429	9.4e-21	81.6	6.9	Gemmata obscuriglobus UQM 2246 gcontig_1106221710839, whole genome shotgun sequence		ASM17177v1	Gemmata obscuriglobus UQM 2246 (planctomycetes)	strain=UQM 2246	214688	SAMN02436172	PRJNA20997	J. Craig Venter Institute	2007-10-23	n/a	major	Contig	full				Representative Genome	GCA_000171775.1	GCF_000171775.1	yes	NC_000003.12	100	296	1.14e-153	547	bacteria
NZ_ABGO01000860.1:169-528	LINE	NZ_ABGO01000860.1	L1MC4_3end	322	562	169	528	9.2e-43	149.8	15.7	Gemmata obscuriglobus UQM 2246 gcontig_1106221704957, whole genome shotgun sequence		ASM17177v1	Gemmata obscuriglobus UQM 2246 (planctomycetes)	strain=UQM 2246	214688	SAMN02436172	PRJNA20997	J. Craig Venter Institute	2007-10-23	n/a	major	Contig	full				Representative Genome	GCA_000171775.1	GCF_000171775.1	yes	NC_000004.12	90	60	2.23e-12	78.7	bacteria
NZ_ABVX01001285.1:1-93	Sat	NZ_ABVX01001285.1	BSR	92	93	93	1	2.1e-21	83.7	1.5	Pectobacterium carotovorum subsp. brasiliensis PBR1692 1261_1261_Sequence00254, whole genome shotgun sequence		ASM17313v1	Pectobacterium carotovorum subsp. brasiliensis PBR1692 (enterobacteria)	strain=PBR1692	558269	SAMN02472014	PRJNA31121	University of Wisconsin	2008-9-9	n/a	major	Contig	full					GCA_000173135.1	GCF_000173135.1	yes	NC_000024.10	95.699	93	9.28e-35	150	bacteria
NZ_ACEO02000031.1:5-1145	LINE	NZ_ACEO02000031.1	L1P1_orf2	1135	1145	1145	5	1.9e-207	695.8	87.2	Neisseria subflava NJ9703 N_subflava-1.0.1_Cont30.1, whole genome shotgun sequence		ASM17395v1	Neisseria subflava NJ9703 (b-proteobacteria)	strain=NJ9703	546268	SAMN00008843	PRJNA30483	Washington University Genome Sequencing Center	2009-10-5	n/a	major	Contig	full				Representative Genome	GCA_000173955.1	GCF_000173955.1	yes	NC_000011.10	75.56	1117	1.34e-143	516	bacteria
NZ_ACEO02000033.1:1-604	LINE	NZ_ACEO02000033.1	L1MC4_3end	507	804	1	604	1e-78	268.9	27.4	Neisseria subflava NJ9703 N_subflava-1.0.1_Cont32.1, whole genome shotgun sequence	WP_004521150.1	ASM17395v1	Neisseria subflava NJ9703 (b-proteobacteria)	strain=NJ9703	546268	SAMN00008843	PRJNA30483	Washington University Genome Sequencing Center	2009-10-5	n/a	major	Contig	full				Representative Genome	GCA_000173955.1	GCF_000173955.1	yes	NC_000006.12	79.156	403	2.14e-69	268	bacteria
NZ_ACEO02000036.1:6-716	LINE	NZ_ACEO02000036.1	L1P1_orf2	698	716	716	6	1.8e-100	340.8	69.2	Neisseria subflava NJ9703 N_subflava-1.0.1_Cont35.1, whole genome shotgun sequence	WP_039862602.1	ASM17395v1	Neisseria subflava NJ9703 (b-proteobacteria)	strain=NJ9703	546268	SAMN00008843	PRJNA30483	Washington University Genome Sequencing Center	2009-10-5	n/a	major	Contig	full				Representative Genome	GCA_000173955.1	GCF_000173955.1	yes	NC_000005.10	73.876	712	5.48e-66	257	bacteria
NZ_ACEO02000049.1:1-510	LINE	NZ_ACEO02000049.1	L1P1_orf2	482	510	1	510	6.2e-57	196.3	77.3	Neisseria subflava NJ9703 N_subflava-1.0.1_Cont50.1, whole genome shotgun sequence		ASM17395v1	Neisseria subflava NJ9703 (b-proteobacteria)	strain=NJ9703	546268	SAMN00008843	PRJNA30483	Washington University Genome Sequencing Center	2009-10-5	n/a	major	Contig	full				Representative Genome	GCA_000173955.1	GCF_000173955.1	yes	NC_000004.12	72.967	492	2.43e-33	148	bacteria
NZ_ADAN01000083.1:1-291	LINE	NZ_ADAN01000083.1	L1P1_orf2	285	292	1	291	8.1e-39	136.2	36.2	Gardnerella vaginalis 5-1 51.contig00090, whole genome shotgun sequence		ASM17649v1	Gardnerella vaginalis 5-1 (high GC Gram+)	strain=5-1	682148	SAMN02472071	PRJNA40895	Center for the Study of Biological Complexity, Virginia Commonwealth University	2010-6-4	n/a	major	Contig	full	Newbler v. 2.0.01.14	175x	454		GCA_000176495.1	GCF_000176495.1	yes	NC_000007.14	76.949	295	6.12e-37	159	bacteria
NZ_ADAN01000087.1:1-263	LINE	NZ_ADAN01000087.1	L1P1_orf2	261	263	1	263	4.1e-18	67.5	64.2	Gardnerella vaginalis 5-1 51.contig00094, whole genome shotgun sequence		ASM17649v1	Gardnerella vaginalis 5-1 (high GC Gram+)	strain=5-1	682148	SAMN02472071	PRJNA40895	Center for the Study of Biological Complexity, Virginia Commonwealth University	2010-6-4	n/a	major	Contig	full	Newbler v. 2.0.01.14	175x	454		GCA_000176495.1	GCF_000176495.1	yes	NC_000004.12	82.301	113	7.27e-16	89.8	bacteria
NZ_ADBE01000050.1:26-557	LINE	NZ_ADBE01000050.1	L1P1_orf2	546	557	557	26	1.9e-14	55.6	70.4	Neisseria polysaccharea ATCC 43768 N_polysaccharea-1.0.1_Cont52.1, whole genome shotgun sequence		ASM17673v1	Neisseria polysaccharea ATCC 43768 (b-proteobacteria)	strain=ATCC 43768	546267	SAMN00008844	PRJNA30479	Washington University Genome Sequencing Center	2009-11-9	n/a	major	Contig	full				Representative Genome	GCA_000176735.1	GCF_000176735.1	yes	NC_000009.12	81.119	143	3.33e-22	111	bacteria
NZ_ADBE01000051.1:1-812	LINE	NZ_ADBE01000051.1	L1P1_orf2	808	813	812	1	5.5e-74	253.2	79.4	Neisseria polysaccharea ATCC 43768 N_polysaccharea-1.0.1_Cont53.1, whole genome shotgun sequence		ASM17673v1	Neisseria polysaccharea ATCC 43768 (b-proteobacteria)	strain=ATCC 43768	546267	SAMN00008844	PRJNA30479	Washington University Genome Sequencing Center	2009-11-9	n/a	major	Contig	full				Representative Genome	GCA_000176735.1	GCF_000176735.1	yes	NC_000012.12	72.686	659	2.99e-49	202	bacteria
NZ_ADBE01000052.1:162-509	LINE	NZ_ADBE01000052.1	L1P1_orf2	326	509	162	509	1.5e-54	188.7	27.3	Neisseria polysaccharea ATCC 43768 N_polysaccharea-1.0.1_Cont55.1, whole genome shotgun sequence		ASM17673v1	Neisseria polysaccharea ATCC 43768 (b-proteobacteria)	strain=ATCC 43768	546267	SAMN00008844	PRJNA30479	Washington University Genome Sequencing Center	2009-11-9	n/a	major	Contig	full				Representative Genome	GCA_000176735.1	GCF_000176735.1	yes	NC_000011.10	72.84	324	4.58e-19	100	bacteria
NZ_ADBE01000057.1:3-470	LINE	NZ_ADBE01000057.1	L1MC4_3end	296	509	3	470	1.3e-43	152.6	29.7	Neisseria polysaccharea ATCC 43768 N_polysaccharea-1.0.1_Cont60.1, whole genome shotgun sequence	WP_003752165.1	ASM17673v1	Neisseria polysaccharea ATCC 43768 (b-proteobacteria)	strain=ATCC 43768	546267	SAMN00008844	PRJNA30479	Washington University Genome Sequencing Center	2009-11-9	n/a	major	Contig	full				Representative Genome	GCA_000176735.1	GCF_000176735.1	yes	NC_000002.12	79.562	137	2.93e-17	95.3	bacteria
NZ_ADBE01000063.1:74-527	LINE	NZ_ADBE01000063.1	L1P1_orf2	455	528	527	74	3.1e-50	174.3	53.6	Neisseria polysaccharea ATCC 43768 N_polysaccharea-1.0.1_Cont73.1, whole genome shotgun sequence		ASM17673v1	Neisseria polysaccharea ATCC 43768 (b-proteobacteria)	strain=ATCC 43768	546267	SAMN00008844	PRJNA30479	Washington University Genome Sequencing Center	2009-11-9	n/a	major	Contig	full				Representative Genome	GCA_000176735.1	GCF_000176735.1	yes	NC_000003.12	79.863	293	9.72e-52	209	bacteria
NZ_ADBE01000069.1:506-1080	LINE	NZ_ADBE01000069.1	L1P1_orf2	554	1080	506	1080	7.3e-51	176.4	46	Neisseria polysaccharea ATCC 43768 N_polysaccharea-1.0.1_Cont82.1, whole genome shotgun sequence	WP_081456213.1	ASM17673v1	Neisseria polysaccharea ATCC 43768 (b-proteobacteria)	strain=ATCC 43768	546267	SAMN00008844	PRJNA30479	Washington University Genome Sequencing Center	2009-11-9	n/a	major	Contig	full				Representative Genome	GCA_000176735.1	GCF_000176735.1	yes	NC_000005.10	81.731	104	2.19e-14	86.1	bacteria
NZ_ADBE01000070.1:9-510	LINE	NZ_ADBE01000070.1	L1P1_orf2	462	511	510	9	6.7e-37	130.1	50.8	Neisseria polysaccharea ATCC 43768 N_polysaccharea-1.0.1_Cont83.1, whole genome shotgun sequence		ASM17673v1	Neisseria polysaccharea ATCC 43768 (b-proteobacteria)	strain=ATCC 43768	546267	SAMN00008844	PRJNA30479	Washington University Genome Sequencing Center	2009-11-9	n/a	major	Contig	full				Representative Genome	GCA_000176735.1	GCF_000176735.1	yes	NC_000005.10	83.444	151	6.7e-29	134	bacteria
NZ_ADBE01000075.1:222-550	LINE	NZ_ADBE01000075.1	L1MC4_3end	297	550	222	550	2.9e-56	194.6	24.7	Neisseria polysaccharea ATCC 43768 N_polysaccharea-1.0.1_Cont94.1, whole genome shotgun sequence	WP_081456214.1	ASM17673v1	Neisseria polysaccharea ATCC 43768 (b-proteobacteria)	strain=ATCC 43768	546267	SAMN00008844	PRJNA30479	Washington University Genome Sequencing Center	2009-11-9	n/a	major	Contig	full				Representative Genome	GCA_000176735.1	GCF_000176735.1	yes	NC_000007.14	80.377	265	1.49e-48	198	bacteria
NZ_ADBE01000079.1:368-785	LINE	NZ_ADBE01000079.1	L1MC4_3end	386	891	368	785	2e-62	215	21.8	Neisseria polysaccharea ATCC 43768 N_polysaccharea-1.0.1_Cont100.1, whole genome shotgun sequence	WP_003752844.1	ASM17673v1	Neisseria polysaccharea ATCC 43768 (b-proteobacteria)	strain=ATCC 43768	546267	SAMN00008844	PRJNA30479	Washington University Genome Sequencing Center	2009-11-9	n/a	major	Contig	full				Representative Genome	GCA_000176735.1	GCF_000176735.1	yes	NC_000005.10	75.851	323	1.52e-34	152	bacteria
NZ_ADBE01000081.1:52-516	LINE	NZ_ADBE01000081.1	L1MC4_3end	375	519	516	52	8.7e-39	136.6	24.5	Neisseria polysaccharea ATCC 43768 N_polysaccharea-1.0.1_Cont108.1, whole genome shotgun sequence		ASM17673v1	Neisseria polysaccharea ATCC 43768 (b-proteobacteria)	strain=ATCC 43768	546267	SAMN00008844	PRJNA30479	Washington University Genome Sequencing Center	2009-11-9	n/a	major	Contig	full				Representative Genome	GCA_000176735.1	GCF_000176735.1	yes	NC_000002.12	97.297	37	8.21e-08	63.9	bacteria
NZ_ADBE01000097.1:1-560	LINE	NZ_ADBE01000097.1	L1P1_orf2	560	560	560	1	1.8e-81	278	59.6	Neisseria polysaccharea ATCC 43768 N_polysaccharea-1.0.1_Cont154.1, whole genome shotgun sequence		ASM17673v1	Neisseria polysaccharea ATCC 43768 (b-proteobacteria)	strain=ATCC 43768	546267	SAMN00008844	PRJNA30479	Washington University Genome Sequencing Center	2009-11-9	n/a	major	Contig	full				Representative Genome	GCA_000176735.1	GCF_000176735.1	yes	NC_000007.14	74.949	487	2.61e-53	215	bacteria
NZ_ADBE01000103.1:1-520	LINE	NZ_ADBE01000103.1	L1P1_orf2	507	530	1	520	8.5e-66	226	70.6	Neisseria polysaccharea ATCC 43768 N_polysaccharea-1.0.1_Cont164.1, whole genome shotgun sequence	WP_003753704.1;WP_003753705.1	ASM17673v1	Neisseria polysaccharea ATCC 43768 (b-proteobacteria)	strain=ATCC 43768	546267	SAMN00008844	PRJNA30479	Washington University Genome Sequencing Center	2009-11-9	n/a	major	Contig	full				Representative Genome	GCA_000176735.1	GCF_000176735.1	yes	NC_000007.14	79.466	487	1.77e-89	335	bacteria
NZ_ADBE01000108.1:3-593	LINE	NZ_ADBE01000108.1	L1P1_orf2	584	593	593	3	2.2e-78	267.7	52.4	Neisseria polysaccharea ATCC 43768 N_polysaccharea-1.0.1_Cont175.1, whole genome shotgun sequence		ASM17673v1	Neisseria polysaccharea ATCC 43768 (b-proteobacteria)	strain=ATCC 43768	546267	SAMN00008844	PRJNA30479	Washington University Genome Sequencing Center	2009-11-9	n/a	major	Contig	full				Representative Genome	GCA_000176735.1	GCF_000176735.1	yes	NC_000007.14	77.5	480	1.25e-71	276	bacteria
NZ_ADBE01000109.1:318-501	LINE	NZ_ADBE01000109.1	L1P1_orf2	166	501	501	318	2.3e-25	91.8	12.3	Neisseria polysaccharea ATCC 43768 N_polysaccharea-1.0.1_Cont179.1, whole genome shotgun sequence		ASM17673v1	Neisseria polysaccharea ATCC 43768 (b-proteobacteria)	strain=ATCC 43768	546267	SAMN00008844	PRJNA30479	Washington University Genome Sequencing Center	2009-11-9	n/a	major	Contig	full				Representative Genome	GCA_000176735.1	GCF_000176735.1	yes	NC_000010.11	79.508	122	1.05e-12	78.7	bacteria
NZ_ADBE01000114.1:138-782	LINE	NZ_ADBE01000114.1	L1MC4_3end	643	782	138	782	3.2e-126	426.7	31.2	Neisseria polysaccharea ATCC 43768 N_polysaccharea-1.0.1_Cont234.1, whole genome shotgun sequence		ASM17673v1	Neisseria polysaccharea ATCC 43768 (b-proteobacteria)	strain=ATCC 43768	546267	SAMN00008844	PRJNA30479	Washington University Genome Sequencing Center	2009-11-9	n/a	major	Contig	full				Representative Genome	GCA_000176735.1	GCF_000176735.1	yes	NC_000008.11	73.899	613	6.5e-55	220	bacteria
NZ_ADBE01000115.1:14-599	LINE	NZ_ADBE01000115.1	L1P1_orf2	554	599	14	599	5.7e-79	269.7	49.2	Neisseria polysaccharea ATCC 43768 N_polysaccharea-1.0.1_Cont235.1, whole genome shotgun sequence		ASM17673v1	Neisseria polysaccharea ATCC 43768 (b-proteobacteria)	strain=ATCC 43768	546267	SAMN00008844	PRJNA30479	Washington University Genome Sequencing Center	2009-11-9	n/a	major	Contig	full				Representative Genome	GCA_000176735.1	GCF_000176735.1	yes	NC_000005.10	74.495	545	2.73e-53	215	bacteria
NZ_ADBE01000118.1:1-664	LINE	NZ_ADBE01000118.1	L1MC4_3end	561	919	1	664	3.4e-87	297.2	26.6	Neisseria polysaccharea ATCC 43768 N_polysaccharea-1.0.1_Cont247.1, whole genome shotgun sequence	WP_025456914.1	ASM17673v1	Neisseria polysaccharea ATCC 43768 (b-proteobacteria)	strain=ATCC 43768	546267	SAMN00008844	PRJNA30479	Washington University Genome Sequencing Center	2009-11-9	n/a	major	Contig	full				Representative Genome	GCA_000176735.1	GCF_000176735.1	yes	NC_000014.9	75.262	477	5.21e-51	207	bacteria
NZ_ADBE01000120.1:1-671	LINE	NZ_ADBE01000120.1	L1P1_orf2	638	671	671	1	3e-92	313.8	88.2	Neisseria polysaccharea ATCC 43768 N_polysaccharea-1.0.1_Cont254.1, whole genome shotgun sequence		ASM17673v1	Neisseria polysaccharea ATCC 43768 (b-proteobacteria)	strain=ATCC 43768	546267	SAMN00008844	PRJNA30479	Washington University Genome Sequencing Center	2009-11-9	n/a	major	Contig	full				Representative Genome	GCA_000176735.1	GCF_000176735.1	yes	NC_000002.12	73.801	584	1.9e-50	206	bacteria
NZ_ADBE01000122.1:245-516	LINE	NZ_ADBE01000122.1	L1MC4_3end	272	516	245	516	1.9e-55	191.9	24.8	Neisseria polysaccharea ATCC 43768 N_polysaccharea-1.0.1_Cont256.1, whole genome shotgun sequence	WP_003754214.1	ASM17673v1	Neisseria polysaccharea ATCC 43768 (b-proteobacteria)	strain=ATCC 43768	546267	SAMN00008844	PRJNA30479	Washington University Genome Sequencing Center	2009-11-9	n/a	major	Contig	full				Representative Genome	GCA_000176735.1	GCF_000176735.1	yes	NC_000001.11	78.755	273	1.57e-42	178	bacteria
NZ_ADBE01000125.1:36-552	LINE	NZ_ADBE01000125.1	L1P1_orf2	504	552	552	36	7e-70	239.5	51.2	Neisseria polysaccharea ATCC 43768 N_polysaccharea-1.0.1_Cont259.1, whole genome shotgun sequence		ASM17673v1	Neisseria polysaccharea ATCC 43768 (b-proteobacteria)	strain=ATCC 43768	546267	SAMN00008844	PRJNA30479	Washington University Genome Sequencing Center	2009-11-9	n/a	major	Contig	full				Representative Genome	GCA_000176735.1	GCF_000176735.1	yes	NC_000005.10	73.559	503	2.45e-38	165	bacteria
NZ_ADBE01000126.1:1-659	LINE	NZ_ADBE01000126.1	L1P1_orf2	661	659	659	1	2.3e-119	403.8	45.8	Neisseria polysaccharea ATCC 43768 N_polysaccharea-1.0.1_Cont262.1, whole genome shotgun sequence		ASM17673v1	Neisseria polysaccharea ATCC 43768 (b-proteobacteria)	strain=ATCC 43768	546267	SAMN00008844	PRJNA30479	Washington University Genome Sequencing Center	2009-11-9	n/a	major	Contig	full				Representative Genome	GCA_000176735.1	GCF_000176735.1	yes	NC_000023.11	76.258	636	4.92e-86	324	bacteria
NZ_ADBE01000139.1:1-685	LINE	NZ_ADBE01000139.1	L1P1_orf2	680	685	685	1	2e-107	364.1	63.5	Neisseria polysaccharea ATCC 43768 N_polysaccharea-1.0.1_Cont284.1, whole genome shotgun sequence		ASM17673v1	Neisseria polysaccharea ATCC 43768 (b-proteobacteria)	strain=ATCC 43768	546267	SAMN00008844	PRJNA30479	Washington University Genome Sequencing Center	2009-11-9	n/a	major	Contig	full				Representative Genome	GCA_000176735.1	GCF_000176735.1	yes	NC_000004.12	75.543	691	8.58e-84	316	bacteria
NZ_ADBF01000107.1:300-541	LINE	NZ_ADBF01000107.1	L1MC4_3end	224	541	300	541	1e-27	99.9	7.3	Neisseria elongata subsp. glycolytica ATCC 29315 N_elongata-1.0.1_Cont116.1, whole genome shotgun sequence		ASM17675v1	Neisseria elongata subsp. glycolytica ATCC 29315 (b-proteobacteria)	strain=ATCC 29315	546263	SAMN00008838	PRJNA30471	Washington University Genome Sequencing Center	2009-11-9	n/a	major	Contig	full					GCA_000176755.2	GCF_000176755.2	yes	NC_000012.12	75.829	211	1.1e-18	99	bacteria
NZ_ADBF01000143.1:1-404	LINE	NZ_ADBF01000143.1	L1MC4_3end	383	523	1	404	2.9e-37	131.5	21.9	Neisseria elongata subsp. glycolytica ATCC 29315 N_elongata-1.0.1_Cont162.1, whole genome shotgun sequence		ASM17675v1	Neisseria elongata subsp. glycolytica ATCC 29315 (b-proteobacteria)	strain=ATCC 29315	546263	SAMN00008838	PRJNA30471	Washington University Genome Sequencing Center	2009-11-9	n/a	major	Contig	full					GCA_000176755.2	GCF_000176755.2	yes	NC_000011.10	75.325	154	5.46e-09	67.6	bacteria
NZ_ADBF01000147.1:130-515	LINE	NZ_ADBF01000147.1	L1MC4_3end	390	535	130	515	1.4e-44	155.8	41	Neisseria elongata subsp. glycolytica ATCC 29315 N_elongata-1.0.1_Cont169.1, whole genome shotgun sequence		ASM17675v1	Neisseria elongata subsp. glycolytica ATCC 29315 (b-proteobacteria)	strain=ATCC 29315	546263	SAMN00008838	PRJNA30471	Washington University Genome Sequencing Center	2009-11-9	n/a	major	Contig	full					GCA_000176755.2	GCF_000176755.2	yes	NC_000012.12	74.324	370	1.82e-28	132	bacteria
NZ_ADBF01000212.1:1-527	LINE	NZ_ADBF01000212.1	L1P1_orf2	528	527	1	527	7.7e-63	216.2	38.2	Neisseria elongata subsp. glycolytica ATCC 29315 N_elongata-1.0.1_Cont295.1, whole genome shotgun sequence		ASM17675v1	Neisseria elongata subsp. glycolytica ATCC 29315 (b-proteobacteria)	strain=ATCC 29315	546263	SAMN00008838	PRJNA30471	Washington University Genome Sequencing Center	2009-11-9	n/a	major	Contig	full					GCA_000176755.2	GCF_000176755.2	yes	NC_000003.12	74.334	413	1.5e-35	156	bacteria
NZ_ADGY01000056.1:5-142	LTR	NZ_ADGY01000056.1	MSTB	156	142	5	142	4.4e-16	65.2	6.5	Helicobacter suis HS1 contig00056, whole genome shotgun sequence		ASM18762v1	Helicobacter suis HS1 (e-proteobacteria)	strain=HS1	710393	SAMN02469776	PRJNA43415	Ghent University, Faculty of Veterinary Medicine, Department of Pathology, Bacteriology and Avian Diseases	2011-2-1	n/a	major	Contig	full	Newbler v. May 2008	36.70x	454	Representative Genome	GCA_000187625.2	GCF_000187625.1	yes	NC_000005.10	100	138	3.19e-66	255	bacteria
NZ_ADJX01000020.1:1-918	LINE	NZ_ADJX01000020.1	L1P1_orf2	914	918	918	1	0	1103.4	75.8	Escherichia coli H605 supercont1.20, whole genome shotgun sequence		ASM211024v1	Escherichia coli H605 (E. coli)	strain=H605	656410	SAMN06392855	PRJNA39025	Broad Institute	2017-4-25	n/a	major	Scaffold	full	unknown v. unknown	37.88x	454		GCA_002110245.1	GCF_002110245.1	yes	NC_000005.10	97.609	920	0	1572	bacteria
NZ_ADJX01000021.1:1-683	LINE	NZ_ADJX01000021.1	L1P1_orf2	683	683	683	1	4.1e-212	711.5	58.5	Escherichia coli H605 supercont1.21, whole genome shotgun sequence		ASM211024v1	Escherichia coli H605 (E. coli)	strain=H605	656410	SAMN06392855	PRJNA39025	Broad Institute	2017-4-25	n/a	major	Scaffold	full	unknown v. unknown	37.88x	454		GCA_002110245.1	GCF_002110245.1	yes	NC_000013.11	94.92	689	0	1070	bacteria
NZ_ADJX01000023.1:1-161	Sat	NZ_ADJX01000023.1	ALR	164	573	1	161	9.4e-29	108.1	4.2	Escherichia coli H605 supercont1.23, whole genome shotgun sequence	WP_085461523.1	ASM211024v1	Escherichia coli H605 (E. coli)	strain=H605	656410	SAMN06392855	PRJNA39025	Broad Institute	2017-4-25	n/a	major	Scaffold	full	unknown v. unknown	37.88x	454		GCA_002110245.1	GCF_002110245.1	yes	NC_000017.11	100	161	6.31e-79	298	bacteria
NZ_ADJX01000023.1:162-333	Sat	NZ_ADJX01000023.1	ALR	170	573	162	333	7.9e-35	127.9	6.1	Escherichia coli H605 supercont1.23, whole genome shotgun sequence	WP_085461523.1	ASM211024v1	Escherichia coli H605 (E. coli)	strain=H605	656410	SAMN06392855	PRJNA39025	Broad Institute	2017-4-25	n/a	major	Scaffold	full	unknown v. unknown	37.88x	454		GCA_002110245.1	GCF_002110245.1	yes	NC_000017.11	98.837	172	4.08e-81	305	bacteria
NZ_ADJX01000023.1:336-504	Sat	NZ_ADJX01000023.1	ALR	167	573	336	504	4.4e-36	131.9	2.9	Escherichia coli H605 supercont1.23, whole genome shotgun sequence	WP_085461523.1	ASM211024v1	Escherichia coli H605 (E. coli)	strain=H605	656410	SAMN06392855	PRJNA39025	Broad Institute	2017-4-25	n/a	major	Scaffold	full	unknown v. unknown	37.88x	454		GCA_002110245.1	GCF_002110245.1	yes	NC_000017.11	96.45	169	8.72e-73	278	bacteria
NZ_ADJX01000025.1:93-405	Alu	NZ_ADJX01000025.1	AluSx	304	522	93	405	8.2e-88	301.3	6.8	Escherichia coli H605 supercont1.25, whole genome shotgun sequence		ASM211024v1	Escherichia coli H605 (E. coli)	strain=H605	656410	SAMN06392855	PRJNA39025	Broad Institute	2017-4-25	n/a	major	Scaffold	full	unknown v. unknown	37.88x	454		GCA_002110245.1	GCF_002110245.1	yes	NC_000006.12	94.569	313	4.48e-133	479	bacteria
NZ_ADJX01000027.1:1-505	LINE	NZ_ADJX01000027.1	L1P1_orf2	507	505	505	1	1.4e-158	533.8	59.9	Escherichia coli H605 supercont1.27, whole genome shotgun sequence		ASM211024v1	Escherichia coli H605 (E. coli)	strain=H605	656410	SAMN06392855	PRJNA39025	Broad Institute	2017-4-25	n/a	major	Scaffold	full	unknown v. unknown	37.88x	454		GCA_002110245.1	GCF_002110245.1	yes	NC_000002.12	100	505	0	933	bacteria
NZ_ADJX01000028.1:267-505	Alu	NZ_ADJX01000028.1	AluSx	236	505	267	505	3.3e-77	266.5	6.4	Escherichia coli H605 supercont1.28, whole genome shotgun sequence		ASM211024v1	Escherichia coli H605 (E. coli)	strain=H605	656410	SAMN06392855	PRJNA39025	Broad Institute	2017-4-25	n/a	major	Scaffold	full	unknown v. unknown	37.88x	454		GCA_002110245.1	GCF_002110245.1	yes	NC_000008.11	97.917	240	9.48e-114	414	bacteria
NZ_ADKT01000361.1:1-107	LINE	NZ_ADKT01000361.1	L1HS_3end	106	107	1	107	1.6e-12	52	8.2	Bordetella pertussis B1831 contig00361, whole genome shotgun sequence		ASM19355v2	Bordetella pertussis B1831 (b-proteobacteria)	strain=B1831	743275	SAMN02470859	PRJNA46273	RIVM	2010-11-9	n/a	major	Contig	full		26x	454		GCA_000193555.2	GCF_000193555.1	yes	NC_000015.10	100	107	3.96e-49	198	bacteria
NZ_ADKT01000386.1:1-92	Alu	NZ_ADKT01000386.1	AluSz	90	92	1	92	1.2e-15	64	5	Bordetella pertussis B1831 contig00386, whole genome shotgun sequence		ASM19355v2	Bordetella pertussis B1831 (b-proteobacteria)	strain=B1831	743275	SAMN02470859	PRJNA46273	RIVM	2010-11-9	n/a	major	Contig	full		26x	454		GCA_000193555.2	GCF_000193555.1	yes	NC_000003.12	100	92	7.01e-41	171	bacteria
NZ_ADUX01000139.1:1-93	Alu	NZ_ADUX01000139.1	AluSg	92	93	93	1	1.6e-19	76.9	4.8	Escherichia coli O157:H7 str. EC4192 EC419200139, whole genome shotgun sequence		ASM17869v1	Escherichia coli O157:H7 str. EC4192 (E. coli)	strain=EC4192	702431	SAMN02470602	PRJNA42811	National Bioforensic Analysis Center	2010-5-11	n/a	major	Contig	full	Newbler v. 1.0.53.17	0.94	454		GCA_000178695.1	GCF_000178695.1	yes	NC_000012.12	97.872	94	4.29e-38	161	bacteria
NZ_ADVC01000086.1:1-96	Alu	NZ_ADVC01000086.1	AluSx	92	96	96	1	1.8e-17	70.1	2.6	Escherichia coli O157:H7 str. EC536 EC53600086, whole genome shotgun sequence		ASM17879v1	Escherichia coli O157:H7 str. EC536 (E. coli)	strain=EC536	702436	SAMN02470599	PRJNA42821	National Bioforensic Analysis Center	2010-5-11	n/a	major	Contig	full	Newbler v. 1.0.53.17	0.93	454		GCA_000178795.1	GCF_000178795.1	yes	NC_000021.9	95.789	95	2.7e-35	152	bacteria
NZ_ADVC01000149.1:1-118	Sat	NZ_ADVC01000149.1	ALR	114	118	1	118	7.5e-24	92.1	5.5	Escherichia coli O157:H7 str. EC536 EC53600149, whole genome shotgun sequence		ASM17879v1	Escherichia coli O157:H7 str. EC536 (E. coli)	strain=EC536	702436	SAMN02470599	PRJNA42821	National Bioforensic Analysis Center	2010-5-11	n/a	major	Contig	full	Newbler v. 1.0.53.17	0.93	454		GCA_000178795.1	GCF_000178795.1	yes	NC_000001.11	99.153	118	5.72e-53	211	bacteria
NZ_AEDQ01000025.1:1-711	LINE	NZ_AEDQ01000025.1	L1P1_orf2	693	713	711	1	9.7e-238	796.5	46.3	Atopobium vaginae PB189-T1-4 contig00007, whole genome shotgun sequence		ASM17971v1	Atopobium vaginae PB189-T1-4 (actinobacteria)	strain=PB189-T1-4	866774	SAMN00100753	PRJNA51071	J. Craig Venter Institute	2010-8-10	n/a	major	Contig	full	Newbler v. 2.3	57x	454	Representative Genome	GCA_000179715.1	GCF_000179715.1	yes	NC_000007.14	96.197	710	0	1153	bacteria
NZ_AFID01000043.1:1-173	LINE	NZ_AFID01000043.1	L1MC4_3end	152	354	173	1	1.7e-14	56	14.4	Kocuria rhizophila P7-4 contig00049, whole genome shotgun sequence		ASM21411v2	Kocuria rhizophila P7-4 (high GC Gram+)	strain=P7-4	1029824	SAMN02470195	PRJNA66631	Genome Resource Center	2011-5-19	n/a	major	Contig	full	Newbler assembler v. 2.3	49x	454 GS Titanium		GCA_000214115.2	GCF_000214115.1	yes	NC_000001.11	81.046	153	1.6e-25	121	bacteria
NZ_AFIE01000154.1:252-471	HSATII	NZ_AFIE01000154.1	HSATII	155	562	252	471	7.2e-13	55.7	23.9	Acinetobacter sp. P8-3-8 contig00161, whole genome shotgun sequence		ASM21413v1	Acinetobacter sp. P8-3-8 (g-proteobacteria)	strain=P8-3-8	1029823	SAMN02470194	PRJNA66629	Genome Resource Center	2011-5-19	n/a	major	Contig	full	Newbler assembler v. 2.3	26x	454 GS FLX Titanium		GCA_000214135.2	GCF_000214135.1	yes	NT_187385.1	80.531	113	4.65e-12	76.8	bacteria
NZ_AFOH01000095.1:26-790	LINE	NZ_AFOH01000095.1	L1P1_orf2	728	811	26	790	7e-91	309.1	89.1	Acidithiobacillus thiooxidans ATCC 19377 090606.asm.C96, whole genome shotgun sequence		ASM22721v2	Acidithiobacillus thiooxidans ATCC 19377 (proteobacteria)	strain=ATCC 19377	637390	SAMN02469801	PRJNA36587	Center for Bioinformatics and Genome Biology	2011-10-3	n/a	major	Contig	full	Phred/Phrap/Consed v. - Sept 2006	9.6x	Sanger	Representative Genome	GCA_000227215.2	GCF_000227215.1	yes	NC_000023.11	97.778	765	0	1314	bacteria
NZ_AIOD01000134.1:1-319	LINE	NZ_AIOD01000134.1	L1P1_orf2	317	319	319	1	1.9e-113	384	22.6	Campylobacter jejuni subsp. jejuni LMG 23263 n_162_l_295_c_5.627119, whole genome shotgun sequence		ASM25435v2	Campylobacter jejuni subsp. jejuni LMG 23263 (e-proteobacteria)	strain=LMG 23263	889242	SAMN02429044	PRJNA52909	Cornell University	2012-3-16	n/a	major	Contig	full	Velvet v. 2009	50-100x	Illumina GAII		GCA_000254355.2	GCF_000254355.1	yes	NC_000002.12	99.687	319	9.43e-165	584	bacteria
NZ_AIOD01000138.1:1-259	LINE	NZ_AIOD01000138.1	L1HS_3end	258	259	1	259	2.3e-89	306.4	19.8	Campylobacter jejuni subsp. jejuni LMG 23263 n_168_l_235_c_14.297873, whole genome shotgun sequence	WP_079264055.1	ASM25435v2	Campylobacter jejuni subsp. jejuni LMG 23263 (e-proteobacteria)	strain=LMG 23263	889242	SAMN02429044	PRJNA52909	Cornell University	2012-3-16	n/a	major	Contig	full	Velvet v. 2009	50-100x	Illumina GAII		GCA_000254355.2	GCF_000254355.1	yes	NC_000001.11	99.614	259	1.69e-131	473	bacteria
NZ_AIOD01000141.1:1-543	LINE	NZ_AIOD01000141.1	L1P1_orf2	541	543	543	1	1.2e-199	670	44.6	Campylobacter jejuni subsp. jejuni LMG 23263 n_173_l_519_c_6.570328, whole genome shotgun sequence		ASM25435v2	Campylobacter jejuni subsp. jejuni LMG 23263 (e-proteobacteria)	strain=LMG 23263	889242	SAMN02429044	PRJNA52909	Cornell University	2012-3-16	n/a	major	Contig	full	Velvet v. 2009	50-100x	Illumina GAII		GCA_000254355.2	GCF_000254355.1	yes	NC_000001.11	98.711	543	0	965	bacteria
NZ_AIOD01000164.1:1-396	LINE	NZ_AIOD01000164.1	L1HS_3end	394	396	396	1	1.8e-144	488.7	20.8	Campylobacter jejuni subsp. jejuni LMG 23263 n_295_l_372_c_12.094086, whole genome shotgun sequence		ASM25435v2	Campylobacter jejuni subsp. jejuni LMG 23263 (e-proteobacteria)	strain=LMG 23263	889242	SAMN02429044	PRJNA52909	Cornell University	2012-3-16	n/a	major	Contig	full	Velvet v. 2009	50-100x	Illumina GAII		GCA_000254355.2	GCF_000254355.1	yes	NC_000011.10	99.747	396	0	726	bacteria
NZ_AIOD01000170.1:1-226	LINE	NZ_AIOD01000170.1	L1P1_orf2	224	226	1	226	6.2e-75	256.2	24.1	Campylobacter jejuni subsp. jejuni LMG 23263 n_370_l_202_c_5.108911, whole genome shotgun sequence		ASM25435v2	Campylobacter jejuni subsp. jejuni LMG 23263 (e-proteobacteria)	strain=LMG 23263	889242	SAMN02429044	PRJNA52909	Cornell University	2012-3-16	n/a	major	Contig	full	Velvet v. 2009	50-100x	Illumina GAII		GCA_000254355.2	GCF_000254355.1	yes	NC_000001.11	100	226	6.91e-115	418	bacteria
NZ_AIOD01000172.1:1-147	HSATII	NZ_AIOD01000172.1	HSATII	139	240	1	147	5e-28	104.9	11.6	Campylobacter jejuni subsp. jejuni LMG 23263 n_425_l_216_c_6.157407, whole genome shotgun sequence		ASM25435v2	Campylobacter jejuni subsp. jejuni LMG 23263 (e-proteobacteria)	strain=LMG 23263	889242	SAMN02429044	PRJNA52909	Cornell University	2012-3-16	n/a	major	Contig	full	Velvet v. 2009	50-100x	Illumina GAII		GCA_000254355.2	GCF_000254355.1	yes	NC_000001.11	100	147	3.42e-71	272	bacteria
NZ_AJLJ01000330.1:135-303	Sat	NZ_AJLJ01000330.1	ALR	166	500	135	303	2.1e-37	136.3	6.7	Fischerella muscicola SAG 1427-1 = PCC 73103 contig00347, whole genome shotgun sequence		FisPCC73103_1.0	Fischerella muscicola SAG 1427-1 = PCC 73103 (cyanobacteria)	strain=SAG 1427-1 = PCC 73103	372781	SAMN02469881	PRJNA104965	Heinrich-Heine-University Duesseldorf	2012-12-5	n/a	major	Contig	full	GS De Novo Assembler v. 2.0.01.14	22.0x	454		GCA_000317245.1	GCF_000317245.1	yes	NC_000020.11	97.633	169	1.12e-76	291	bacteria
NZ_AJLJ01000330.1:306-477	Sat	NZ_AJLJ01000330.1	ALR	168	500	306	477	4.3e-39	141.8	8.7	Fischerella muscicola SAG 1427-1 = PCC 73103 contig00347, whole genome shotgun sequence		FisPCC73103_1.0	Fischerella muscicola SAG 1427-1 = PCC 73103 (cyanobacteria)	strain=SAG 1427-1 = PCC 73103	372781	SAMN02469881	PRJNA104965	Heinrich-Heine-University Duesseldorf	2012-12-5	n/a	major	Contig	full	GS De Novo Assembler v. 2.0.01.14	22.0x	454		GCA_000317245.1	GCF_000317245.1	yes	NT_187420.1	95.93	172	2.47e-73	279	bacteria
NZ_AJLJ01000330.1:9-133	Sat	NZ_AJLJ01000330.1	ALR	99	500	9	133	3.8e-15	63.8	7.7	Fischerella muscicola SAG 1427-1 = PCC 73103 contig00347, whole genome shotgun sequence		FisPCC73103_1.0	Fischerella muscicola SAG 1427-1 = PCC 73103 (cyanobacteria)	strain=SAG 1427-1 = PCC 73103	372781	SAMN02469881	PRJNA104965	Heinrich-Heine-University Duesseldorf	2012-12-5	n/a	major	Contig	full	GS De Novo Assembler v. 2.0.01.14	22.0x	454		GCA_000317245.1	GCF_000317245.1	yes	NC_000020.11	96	125	1.34e-49	200	bacteria
NZ_AJRE01000517.1:3-313	Alu	NZ_AJRE01000517.1	AluSx	306	1163	313	3	1.3e-95	327	9.2	Streptococcus sp. GMD4S Contig_517, whole genome shotgun sequence		ASM29695v1	Streptococcus sp. GMD4S (firmicutes)	strain=GMD4S	1169673	SAMN02470259	PRJNA157417	Los Alamos National Laboratory	2012-9-14	n/a	major	Contig	full	Velvet v. 1.1.05	900x	Illumina HiSeq		GCA_000296955.1	GCF_000296955.1	yes	NC_000019.10	98.726	314	7.19e-156	555	bacteria
NZ_AJRH01000151.1:1-529	LINE	NZ_AJRH01000151.1	L1HS_5end	508	1188	529	1	1.1e-180	608.1	10.7	Streptococcus sp. GMD6S Contig_151, whole genome shotgun sequence		ASM29701v1	Streptococcus sp. GMD6S (firmicutes)	strain=GMD6S	1169675	SAMN02470280	PRJNA157421	Los Alamos National Laboratory	2012-9-14	n/a	major	Contig	full	Velvet v. 1.1.05	900x	Illumina HiSeq		GCA_000297015.1	GCF_000297015.1	yes	NC_000005.10	100	500	0	924	bacteria
NZ_AJVN01000155.1:1-160	HSATII	NZ_AJVN01000155.1	HSATII	153	274	1	160	1.8e-40	145.5	12.8	Dickeya zeae ZJU1202 DZcontig155, whole genome shotgun sequence		ASM26407v1	Dickeya zeae ZJU1202 (enterobacteria)	strain=ZJU1202	1175299	SAMN02472172	PRJNA159489	Institute of Biotechnology	2012-5-23	n/a	major	Contig	full	CLC De Novo Assembly v. 3.2	148.0x	Illumina HiSeq		GCA_000264075.1	GCF_000264075.1	yes	NC_000001.11	91.975	162	1.39e-55	220	bacteria
NZ_AKAK01000155.1:1-212	Alu	NZ_AKAK01000155.1	AluSg	212	212	1	212	1.7e-62	216.2	3.6	Klebsiella pneumoniae subsp. pneumoniae KPNIH20 contig00155, whole genome shotgun sequence		KPNIH20_1	Klebsiella pneumoniae subsp. pneumoniae KPNIH20 (enterobacteria)	strain=KPNIH20	1128954	SAMN01057650	PRJNA80235	NISC	2012-7-24	n/a	major	Contig	full	Newbler v. 2.5.3	36.0x	454 GS FLX		GCA_000281375.1	GCF_000281375.1	yes	NC_000015.10	93.488	215	2.41e-84	316	bacteria
NZ_AKPL01000008.1:1-2797	LINE	NZ_AKPL01000008.1	L1P1_orf2	2796	3390	1	2797	0	3542.8	260	Helicobacter pylori Hp P-4 HpP_4.contig.7, whole genome shotgun sequence	WP_001897351.1	ASM27484v2	Helicobacter pylori Hp P-4 (e-proteobacteria)	strain=Hp P-4	992075	SAMN00778285	PRJNA64177	Institute for Genome Sciences	2012-6-28	n/a		Contig	full	Celera Assembler v. 6.1	48.43x	Illumina;454		GCA_000274845.2	GCF_000274845.2	yes	NC_000001.11	98.749	2797	0	4972	bacteria
NZ_AKZK01000069.1:1-151	HSATII	NZ_AKZK01000069.1	HSATII	151	216	1	151	4.8e-37	134.4	11.6	Lactobacillus rossiae DSM 15814 l-ross-dsmz36220_contig_44_1, whole genome shotgun sequence		LactoDSM15814_V1	Lactobacillus rossiae DSM 15814 (firmicutes)	strain=DSM 15814	1114972	SAMN02471396	PRJNA165045	Department of Biologia e Università di Bari-Dipartimenti Chimica Agro-Forestale ed Ambientale	2012-7-23	n/a	major	Scaffold	full	CLC Genomics Workbench v. 5.01	1000.0x	Illumina HiSeq		GCA_000277855.1	GCF_000277855.1	yes	NC_000001.11	100	151	2.11e-73	279	bacteria
NZ_AKZK01000084.1:258-352	Sat	NZ_AKZK01000084.1	ALR	93	352	258	352	3.5e-18	73.7	5.1	Lactobacillus rossiae DSM 15814 l-ross-dsmz36220_contig_58_1, whole genome shotgun sequence		LactoDSM15814_V1	Lactobacillus rossiae DSM 15814 (firmicutes)	strain=DSM 15814	1114972	SAMN02471396	PRJNA165045	Department of Biologia e Università di Bari-Dipartimenti Chimica Agro-Forestale ed Ambientale	2012-7-23	n/a	major	Scaffold	full	CLC Genomics Workbench v. 5.01	1000.0x	Illumina HiSeq		GCA_000277855.1	GCF_000277855.1	yes	NC_000018.10	100	95	1.58e-42	176	bacteria
NZ_AKZK01000084.1:87-257	Sat	NZ_AKZK01000084.1	ALR	170	352	87	257	5.8e-46	164.2	5.8	Lactobacillus rossiae DSM 15814 l-ross-dsmz36220_contig_58_1, whole genome shotgun sequence		LactoDSM15814_V1	Lactobacillus rossiae DSM 15814 (firmicutes)	strain=DSM 15814	1114972	SAMN02471396	PRJNA165045	Department of Biologia e Università di Bari-Dipartimenti Chimica Agro-Forestale ed Ambientale	2012-7-23	n/a	major	Scaffold	full	CLC Genomics Workbench v. 5.01	1000.0x	Illumina HiSeq		GCA_000277855.1	GCF_000277855.1	yes	NC_000018.10	100	171	1.87e-84	316	bacteria
NZ_AKZK01000085.1:177-347	Sat	NZ_AKZK01000085.1	ALR	170	409	347	177	1.5e-46	166.1	5.6	Lactobacillus rossiae DSM 15814 l-ross-dsmz36220_contig_59_1, whole genome shotgun sequence		LactoDSM15814_V1	Lactobacillus rossiae DSM 15814 (firmicutes)	strain=DSM 15814	1114972	SAMN02471396	PRJNA165045	Department of Biologia e Università di Bari-Dipartimenti Chimica Agro-Forestale ed Ambientale	2012-7-23	n/a	major	Scaffold	full	CLC Genomics Workbench v. 5.01	1000.0x	Illumina HiSeq		GCA_000277855.1	GCF_000277855.1	yes	NC_000009.12	99.415	171	8.71e-83	311	bacteria
NZ_AKZK01000085.1:6-176	Sat	NZ_AKZK01000085.1	ALR	168	409	176	6	6.3e-39	141.3	11.2	Lactobacillus rossiae DSM 15814 l-ross-dsmz36220_contig_59_1, whole genome shotgun sequence		LactoDSM15814_V1	Lactobacillus rossiae DSM 15814 (firmicutes)	strain=DSM 15814	1114972	SAMN02471396	PRJNA165045	Department of Biologia e Università di Bari-Dipartimenti Chimica Agro-Forestale ed Ambientale	2012-7-23	n/a	major	Scaffold	full	CLC Genomics Workbench v. 5.01	1000.0x	Illumina HiSeq		GCA_000277855.1	GCF_000277855.1	yes	NC_000013.11	100	169	2.42e-83	313	bacteria
NZ_AKZK01000088.1:100-207	Sat	NZ_AKZK01000088.1	ALR	105	207	207	100	5.7e-24	92.5	1.2	Lactobacillus rossiae DSM 15814 l-ross-dsmz36220_contig_64_1, whole genome shotgun sequence		LactoDSM15814_V1	Lactobacillus rossiae DSM 15814 (firmicutes)	strain=DSM 15814	1114972	SAMN02471396	PRJNA165045	Department of Biologia e Università di Bari-Dipartimenti Chimica Agro-Forestale ed Ambientale	2012-7-23	n/a	major	Scaffold	full	CLC Genomics Workbench v. 5.01	1000.0x	Illumina HiSeq		GCA_000277855.1	GCF_000277855.1	yes	NC_000013.11	100	108	1.11e-49	200	bacteria
NZ_AKZK01000088.1:1-99	Sat	NZ_AKZK01000088.1	ALR	98	207	99	1	3.7e-21	83.3	4.6	Lactobacillus rossiae DSM 15814 l-ross-dsmz36220_contig_64_1, whole genome shotgun sequence		LactoDSM15814_V1	Lactobacillus rossiae DSM 15814 (firmicutes)	strain=DSM 15814	1114972	SAMN02471396	PRJNA165045	Department of Biologia e Università di Bari-Dipartimenti Chimica Agro-Forestale ed Ambientale	2012-7-23	n/a	major	Scaffold	full	CLC Genomics Workbench v. 5.01	1000.0x	Illumina HiSeq		GCA_000277855.1	GCF_000277855.1	yes	NC_000013.11	100	99	9.98e-45	183	bacteria
NZ_AKZK01000089.1:72-209	HSATII	NZ_AKZK01000089.1	HSATII	142	209	72	209	1.1e-11	51.8	15.6	Lactobacillus rossiae DSM 15814 l-ross-dsmz36220_contig_65_1, whole genome shotgun sequence		LactoDSM15814_V1	Lactobacillus rossiae DSM 15814 (firmicutes)	strain=DSM 15814	1114972	SAMN02471396	PRJNA165045	Department of Biologia e Università di Bari-Dipartimenti Chimica Agro-Forestale ed Ambientale	2012-7-23	n/a	major	Scaffold	full	CLC Genomics Workbench v. 5.01	1000.0x	Illumina HiSeq		GCA_000277855.1	GCF_000277855.1	yes	NC_000004.12	84.892	139	3.35e-31	139	bacteria
NZ_AKZK01000109.1:1-153	HSATII	NZ_AKZK01000109.1	HSATII	147	554	153	1	1.2e-28	107.1	12.3	Lactobacillus rossiae DSM 15814 l-ross-dsmz36220_contig_83_1, whole genome shotgun sequence		LactoDSM15814_V1	Lactobacillus rossiae DSM 15814 (firmicutes)	strain=DSM 15814	1114972	SAMN02471396	PRJNA165045	Department of Biologia e Università di Bari-Dipartimenti Chimica Agro-Forestale ed Ambientale	2012-7-23	n/a	major	Scaffold	full	CLC Genomics Workbench v. 5.01	1000.0x	Illumina HiSeq		GCA_000277855.1	GCF_000277855.1	yes	NC_000001.11	100	153	1.66e-74	283	bacteria
NZ_AKZK01000109.1:157-329	HSATII	NZ_AKZK01000109.1	HSATII	168	554	329	157	1.6e-39	142.5	17.8	Lactobacillus rossiae DSM 15814 l-ross-dsmz36220_contig_83_1, whole genome shotgun sequence		LactoDSM15814_V1	Lactobacillus rossiae DSM 15814 (firmicutes)	strain=DSM 15814	1114972	SAMN02471396	PRJNA165045	Department of Biologia e Università di Bari-Dipartimenti Chimica Agro-Forestale ed Ambientale	2012-7-23	n/a	major	Scaffold	full	CLC Genomics Workbench v. 5.01	1000.0x	Illumina HiSeq		GCA_000277855.1	GCF_000277855.1	yes	NC_000001.11	100	173	1.47e-85	320	bacteria
NZ_AKZK01000109.1:425-554	HSATII	NZ_AKZK01000109.1	HSATII	125	554	554	425	1.1e-28	107.2	10.2	Lactobacillus rossiae DSM 15814 l-ross-dsmz36220_contig_83_1, whole genome shotgun sequence		LactoDSM15814_V1	Lactobacillus rossiae DSM 15814 (firmicutes)	strain=DSM 15814	1114972	SAMN02471396	PRJNA165045	Department of Biologia e Università di Bari-Dipartimenti Chimica Agro-Forestale ed Ambientale	2012-7-23	n/a	major	Scaffold	full	CLC Genomics Workbench v. 5.01	1000.0x	Illumina HiSeq		GCA_000277855.1	GCF_000277855.1	yes	NC_000001.11	100	130	8.27e-62	241	bacteria
NZ_AKZK01000115.1:159-559	LINE	NZ_AKZK01000115.1	L1HS_3end	399	559	159	559	4.7e-143	484.2	31.3	Lactobacillus rossiae DSM 15814 l-ross-dsmz36220_contig_94_1, whole genome shotgun sequence		LactoDSM15814_V1	Lactobacillus rossiae DSM 15814 (firmicutes)	strain=DSM 15814	1114972	SAMN02471396	PRJNA165045	Department of Biologia e Università di Bari-Dipartimenti Chimica Agro-Forestale ed Ambientale	2012-7-23	n/a	major	Scaffold	full	CLC Genomics Workbench v. 5.01	1000.0x	Illumina HiSeq		GCA_000277855.1	GCF_000277855.1	yes	NC_000008.11	100	401	0	741	bacteria
NZ_AKZK01000120.1:214-301	Sat	NZ_AKZK01000120.1	ALR	86	301	214	301	1.2e-18	75.1	8.1	Lactobacillus rossiae DSM 15814 l-ross-dsmz36220_contig_98_1, whole genome shotgun sequence		LactoDSM15814_V1	Lactobacillus rossiae DSM 15814 (firmicutes)	strain=DSM 15814	1114972	SAMN02471396	PRJNA165045	Department of Biologia e Università di Bari-Dipartimenti Chimica Agro-Forestale ed Ambientale	2012-7-23	n/a	major	Scaffold	full	CLC Genomics Workbench v. 5.01	1000.0x	Illumina HiSeq		GCA_000277855.1	GCF_000277855.1	yes	NC_000013.11	100	88	1.1e-38	163	bacteria
NZ_AKZK01000120.1:43-213	Sat	NZ_AKZK01000120.1	ALR	170	301	43	213	2.3e-40	145.9	3.1	Lactobacillus rossiae DSM 15814 l-ross-dsmz36220_contig_98_1, whole genome shotgun sequence		LactoDSM15814_V1	Lactobacillus rossiae DSM 15814 (firmicutes)	strain=DSM 15814	1114972	SAMN02471396	PRJNA165045	Department of Biologia e Università di Bari-Dipartimenti Chimica Agro-Forestale ed Ambientale	2012-7-23	n/a	major	Scaffold	full	CLC Genomics Workbench v. 5.01	1000.0x	Illumina HiSeq		GCA_000277855.1	GCF_000277855.1	yes	NC_000013.11	100	171	1.87e-84	316	bacteria
NZ_ALQK01000043.1:644-2603	LINE	NZ_ALQK01000043.1	L1P1_orf2	1959	2603	2603	644	0	2502	157.7	Streptococcus agalactiae CCUG 19094 ctg7180000003036, whole genome shotgun sequence	WP_000321103.1	ASM28867v1	Streptococcus agalactiae CCUG 19094 (firmicutes)	strain=CCUG 19094	1154807	SAMN00991067	PRJNA86209	The J. Craig Venter Institute	2012-8-15	n/a	major	Contig	full	Celera v. 7.0	54.26x	Illumina		GCA_000288675.1	GCF_000288675.1	yes	NC_000012.12	98.827	1960	0	3493	bacteria
NZ_ALQR01000038.1:907-4200	LINE	NZ_ALQR01000038.1	L1P1_orf2	3293	4806	907	4200	0	4174.5	311	Streptococcus agalactiae CCUG 37742 ctg7180000003093, whole genome shotgun sequence	WP_000552499.1;WP_000148030.1	ASM28881v1	Streptococcus agalactiae CCUG 37742 (firmicutes)	strain=CCUG 37742	1154814	SAMN00991112	PRJNA86237	The J. Craig Venter Institute	2012-8-15	n/a	major	Contig	full	Celera v. 7.0	54.24x	Illumina		GCA_000288815.1	GCF_000288815.1	yes	NC_000006.12	98.725	3294	0	5851	bacteria
NZ_ALYJ01000077.1:1-138	Sat	NZ_ALYJ01000077.1	ALR	137	548	138	1	1.6e-29	110.5	8	Clostridium botulinum CDC66177 contig_78, whole genome shotgun sequence		ASM30980v1	Clostridium botulinum CDC66177 (firmicutes)	strain=CDC66177	1221327	SAMN02952937	PRJNA172445	Centers for Disease Control and Prevention	2012-11-2	n/a	major	Contig	full	CLC NGS Cell v. Aug-2012	28.0x	PacBio		GCA_000309805.1	GCF_000309805.1	yes	NC_000018.10	100	138	3.19e-66	255	bacteria
NZ_ALYJ01000077.1:139-309	Sat	NZ_ALYJ01000077.1	ALR	170	548	309	139	4e-46	164.6	6	Clostridium botulinum CDC66177 contig_78, whole genome shotgun sequence		ASM30980v1	Clostridium botulinum CDC66177 (firmicutes)	strain=CDC66177	1221327	SAMN02952937	PRJNA172445	Centers for Disease Control and Prevention	2012-11-2	n/a	major	Contig	full	CLC NGS Cell v. Aug-2012	28.0x	PacBio		GCA_000309805.1	GCF_000309805.1	yes	NC_000018.10	98.246	171	1.89e-79	300	bacteria
NZ_ALYJ01000077.1:310-480	Sat	NZ_ALYJ01000077.1	ALR	170	548	480	310	1.1e-35	130.6	6.1	Clostridium botulinum CDC66177 contig_78, whole genome shotgun sequence		ASM30980v1	Clostridium botulinum CDC66177 (firmicutes)	strain=CDC66177	1221327	SAMN02952937	PRJNA172445	Centers for Disease Control and Prevention	2012-11-2	n/a	major	Contig	full	CLC NGS Cell v. Aug-2012	28.0x	PacBio		GCA_000309805.1	GCF_000309805.1	yes	NC_000018.10	98.83	171	4.05e-81	305	bacteria
NZ_ALYJ01000077.1:481-548	Sat	NZ_ALYJ01000077.1	ALR	67	548	548	481	8.3e-11	49.5	0.9	Clostridium botulinum CDC66177 contig_78, whole genome shotgun sequence		ASM30980v1	Clostridium botulinum CDC66177 (firmicutes)	strain=CDC66177	1221327	SAMN02952937	PRJNA172445	Centers for Disease Control and Prevention	2012-11-2	n/a	major	Contig	full	CLC NGS Cell v. Aug-2012	28.0x	PacBio		GCA_000309805.1	GCF_000309805.1	yes	NC_000018.10	100	68	9.71e-28	126	bacteria
NZ_AMDX02000044.1:1-259	LINE	NZ_AMDX02000044.1	L1HS_3end	257	259	259	1	3.3e-75	259.5	15.9	Salmonella enterica subsp. enterica serovar Typhimurium str. STm1 34, whole genome shotgun sequence	WP_071846694.1	STm1.2	Salmonella enterica subsp. enterica serovar Typhimurium str. STm1 (enterobacteria)	strain=STm1	1218143	SAMN02221889	PRJNA171774	University of Melbourne	2013-8-23	n/a	major	Contig	full	SPAdes v. 2.4.0	1000.0x	Illumina HiSeq		GCA_000312825.2	GCF_000312825.2	yes	NC_000004.12	94.758	248	2.26e-105	387	bacteria
NZ_AMDX02000100.1:1-363	LINE	NZ_AMDX02000100.1	L1HS_3end	360	363	1	363	7.7e-122	413.9	13.2	Salmonella enterica subsp. enterica serovar Typhimurium str. STm1 85, whole genome shotgun sequence		STm1.2	Salmonella enterica subsp. enterica serovar Typhimurium str. STm1 (enterobacteria)	strain=STm1	1218143	SAMN02221889	PRJNA171774	University of Melbourne	2013-8-23	n/a	major	Contig	full	SPAdes v. 2.4.0	1000.0x	Illumina HiSeq		GCA_000312825.2	GCF_000312825.2	yes	NC_000023.11	96.703	364	8.34e-171	604	bacteria
NZ_AMDX02000106.1:93-245	HSATII	NZ_AMDX02000106.1	HSATII	149	245	93	245	8.7e-32	117.2	17.4	Salmonella enterica subsp. enterica serovar Typhimurium str. STm1 90, whole genome shotgun sequence		STm1.2	Salmonella enterica subsp. enterica serovar Typhimurium str. STm1 (enterobacteria)	strain=STm1	1218143	SAMN02221889	PRJNA171774	University of Melbourne	2013-8-23	n/a	major	Contig	full	SPAdes v. 2.4.0	1000.0x	Illumina HiSeq		GCA_000312825.2	GCF_000312825.2	yes	NC_000001.11	98.693	153	3.59e-71	272	bacteria
NZ_AMDX02000113.1:1-675	LINE	NZ_AMDX02000113.1	L1P1_orf2	672	675	1	675	1.5e-244	819.1	56.8	Salmonella enterica subsp. enterica serovar Typhimurium str. STm1 97, whole genome shotgun sequence		STm1.2	Salmonella enterica subsp. enterica serovar Typhimurium str. STm1 (enterobacteria)	strain=STm1	1218143	SAMN02221889	PRJNA171774	University of Melbourne	2013-8-23	n/a	major	Contig	full	SPAdes v. 2.4.0	1000.0x	Illumina HiSeq		GCA_000312825.2	GCF_000312825.2	yes	NC_000005.10	97.926	675	0	1170	bacteria
NZ_AMQR01000071.1:1-425	LINE	NZ_AMQR01000071.1	L1P1_orf2	423	425	1	425	7.5e-159	534.7	22.9	Vibrio vulnificus B2 C224contig71, whole genome shotgun sequence		C224contig	Vibrio vulnificus B2 (g-proteobacteria)	strain=B2	1229202	SAMN02471155	PRJNA174154	Zhejiang University	2012-10-5	n/a	major	Contig	full	IDBA-UD v. 1.0.9	100.0x	Illumina		GCA_000303175.1	GCF_000303175.1	yes	NC_000005.10	99.529	425	0	774	bacteria
NZ_AMQR01000072.1:1-226	LINE	NZ_AMQR01000072.1	L1P1_orf2	225	226	1	226	1.8e-76	261.3	18.4	Vibrio vulnificus B2 C224contig72, whole genome shotgun sequence		C224contig	Vibrio vulnificus B2 (g-proteobacteria)	strain=B2	1229202	SAMN02471155	PRJNA174154	Zhejiang University	2012-10-5	n/a	major	Contig	full	IDBA-UD v. 1.0.9	100.0x	Illumina		GCA_000303175.1	GCF_000303175.1	yes	NC_000004.12	100	226	6.91e-115	418	bacteria
NZ_AMQR01000081.1:1-351	LINE	NZ_AMQR01000081.1	L1P1_orf2	350	351	1	351	2.7e-113	383.5	66.7	Vibrio vulnificus B2 C224contig81, whole genome shotgun sequence		C224contig	Vibrio vulnificus B2 (g-proteobacteria)	strain=B2	1229202	SAMN02471155	PRJNA174154	Zhejiang University	2012-10-5	n/a	major	Contig	full	IDBA-UD v. 1.0.9	100.0x	Illumina		GCA_000303175.1	GCF_000303175.1	yes	NC_000002.12	99.145	351	3.69e-179	632	bacteria
NZ_AMQR01000084.1:1-724	LINE	NZ_AMQR01000084.1	L1P1_orf2	723	724	724	1	1.7e-266	891.9	64.2	Vibrio vulnificus B2 C224contig85, whole genome shotgun sequence		C224contig	Vibrio vulnificus B2 (g-proteobacteria)	strain=B2	1229202	SAMN02471155	PRJNA174154	Zhejiang University	2012-10-5	n/a	major	Contig	full	IDBA-UD v. 1.0.9	100.0x	Illumina		GCA_000303175.1	GCF_000303175.1	yes	NC_000007.14	98.476	722	0	1273	bacteria
NZ_AMQR01000094.1:1-289	LINE	NZ_AMQR01000094.1	L1P1_orf2	288	289	289	1	1.5e-100	341.2	28.1	Vibrio vulnificus B2 C224contig95, whole genome shotgun sequence		C224contig	Vibrio vulnificus B2 (g-proteobacteria)	strain=B2	1229202	SAMN02471155	PRJNA174154	Zhejiang University	2012-10-5	n/a	major	Contig	full	IDBA-UD v. 1.0.9	100.0x	Illumina		GCA_000303175.1	GCF_000303175.1	yes	NC_000005.10	100	289	8.64e-150	534	bacteria
NZ_AMQR01000131.1:148-289	HSATII	NZ_AMQR01000131.1	HSATII	134	289	289	148	1.6e-20	79.9	20.6	Vibrio vulnificus B2 C224contig132, whole genome shotgun sequence		C224contig	Vibrio vulnificus B2 (g-proteobacteria)	strain=B2	1229202	SAMN02471155	PRJNA174154	Zhejiang University	2012-10-5	n/a	major	Contig	full	IDBA-UD v. 1.0.9	100.0x	Illumina		GCA_000303175.1	GCF_000303175.1	yes	NT_187425.1	92.361	144	4.36e-50	202	bacteria
NZ_AMQR01000132.1:48-284	LTR	NZ_AMQR01000132.1	MSTB	240	284	48	284	4.1e-24	91.6	9.8	Vibrio vulnificus B2 C224contig133, whole genome shotgun sequence		C224contig	Vibrio vulnificus B2 (g-proteobacteria)	strain=B2	1229202	SAMN02471155	PRJNA174154	Zhejiang University	2012-10-5	n/a	major	Contig	full	IDBA-UD v. 1.0.9	100.0x	Illumina		GCA_000303175.1	GCF_000303175.1	yes	NC_000017.11	96	175	2.76e-74	283	bacteria
NZ_AMQR01000134.1:1-278	LINE	NZ_AMQR01000134.1	L1HS_3end	277	278	1	278	2e-97	333	16.7	Vibrio vulnificus B2 C224contig135, whole genome shotgun sequence		C224contig	Vibrio vulnificus B2 (g-proteobacteria)	strain=B2	1229202	SAMN02471155	PRJNA174154	Zhejiang University	2012-10-5	n/a	major	Contig	full	IDBA-UD v. 1.0.9	100.0x	Illumina		GCA_000303175.1	GCF_000303175.1	yes	NC_000001.11	100	278	1.08e-143	514	bacteria
NZ_AMQR01000136.1:100-270	Sat	NZ_AMQR01000136.1	ALR	170	273	100	270	5.5e-48	170.6	6.6	Vibrio vulnificus B2 C224contig137, whole genome shotgun sequence		C224contig	Vibrio vulnificus B2 (g-proteobacteria)	strain=B2	1229202	SAMN02471155	PRJNA174154	Zhejiang University	2012-10-5	n/a	major	Contig	full	IDBA-UD v. 1.0.9	100.0x	Illumina		GCA_000303175.1	GCF_000303175.1	yes	NC_000002.12	91.228	171	1.94e-59	233	bacteria
NZ_AMQR01000136.1:1-99	Sat	NZ_AMQR01000136.1	ALR	99	273	1	99	1.8e-14	61.4	7.7	Vibrio vulnificus B2 C224contig137, whole genome shotgun sequence		C224contig	Vibrio vulnificus B2 (g-proteobacteria)	strain=B2	1229202	SAMN02471155	PRJNA174154	Zhejiang University	2012-10-5	n/a	major	Contig	full	IDBA-UD v. 1.0.9	100.0x	Illumina		GCA_000303175.1	GCF_000303175.1	yes	NC_000011.10	83.673	98	1.73e-17	93.5	bacteria
NZ_AMQR01000146.1:9-237	LTR	NZ_AMQR01000146.1	MSTB	249	240	9	237	8.3e-27	100	2.9	Vibrio vulnificus B2 C224contig147, whole genome shotgun sequence		C224contig	Vibrio vulnificus B2 (g-proteobacteria)	strain=B2	1229202	SAMN02471155	PRJNA174154	Zhejiang University	2012-10-5	n/a	major	Contig	full	IDBA-UD v. 1.0.9	100.0x	Illumina		GCA_000303175.1	GCF_000303175.1	yes	NC_000015.10	92.035	226	9.47e-84	315	bacteria
NZ_AMQR01000147.1:108-237	HSATII	NZ_AMQR01000147.1	HSATII	130	237	108	237	1.7e-27	103.2	10.1	Vibrio vulnificus B2 C224contig148, whole genome shotgun sequence		C224contig	Vibrio vulnificus B2 (g-proteobacteria)	strain=B2	1229202	SAMN02471155	PRJNA174154	Zhejiang University	2012-10-5	n/a	major	Contig	full	IDBA-UD v. 1.0.9	100.0x	Illumina		GCA_000303175.1	GCF_000303175.1	yes	NC_000001.11	100	130	8.27e-62	241	bacteria
NZ_AMQR01000148.1:8-178	Sat	NZ_AMQR01000148.1	ALR	169	233	8	178	1.1e-47	169.1	4.1	Vibrio vulnificus B2 C224contig149, whole genome shotgun sequence		C224contig	Vibrio vulnificus B2 (g-proteobacteria)	strain=B2	1229202	SAMN02471155	PRJNA174154	Zhejiang University	2012-10-5	n/a	major	Contig	full	IDBA-UD v. 1.0.9	100.0x	Illumina		GCA_000303175.1	GCF_000303175.1	yes	NC_000013.11	98.246	171	1.89e-79	300	bacteria
NZ_AMQR01000149.1:104-227	HSATII	NZ_AMQR01000149.1	HSATII	124	227	104	227	5.8e-28	104.7	8.7	Vibrio vulnificus B2 C224contig150, whole genome shotgun sequence		C224contig	Vibrio vulnificus B2 (g-proteobacteria)	strain=B2	1229202	SAMN02471155	PRJNA174154	Zhejiang University	2012-10-5	n/a	major	Contig	full	IDBA-UD v. 1.0.9	100.0x	Illumina		GCA_000303175.1	GCF_000303175.1	yes	NC_000001.11	100	124	1.69e-58	230	bacteria
NZ_AMQR01000150.1:1-157	HSATII	NZ_AMQR01000150.1	HSATII	159	219	157	1	1.6e-36	132.5	12.3	Vibrio vulnificus B2 C224contig151, whole genome shotgun sequence		C224contig	Vibrio vulnificus B2 (g-proteobacteria)	strain=B2	1229202	SAMN02471155	PRJNA174154	Zhejiang University	2012-10-5	n/a	major	Contig	full	IDBA-UD v. 1.0.9	100.0x	Illumina		GCA_000303175.1	GCF_000303175.1	yes	NC_000001.11	100	157	1.02e-76	291	bacteria
NZ_AMQR01000151.1:1-167	Sat	NZ_AMQR01000151.1	ALR	167	211	1	167	9.3e-36	130.3	7.6	Vibrio vulnificus B2 C224contig152, whole genome shotgun sequence		C224contig	Vibrio vulnificus B2 (g-proteobacteria)	strain=B2	1229202	SAMN02471155	PRJNA174154	Zhejiang University	2012-10-5	n/a	major	Contig	full	IDBA-UD v. 1.0.9	100.0x	Illumina		GCA_000303175.1	GCF_000303175.1	yes	NC_000023.11	96.988	166	2.39e-73	279	bacteria
NZ_AMQR01000152.1:108-216	Sat	NZ_AMQR01000152.1	ALR	108	216	108	216	2.4e-28	106.6	5.7	Vibrio vulnificus B2 C224contig153, whole genome shotgun sequence	WP_049798923.1	C224contig	Vibrio vulnificus B2 (g-proteobacteria)	strain=B2	1229202	SAMN02471155	PRJNA174154	Zhejiang University	2012-10-5	n/a	major	Contig	full	IDBA-UD v. 1.0.9	100.0x	Illumina		GCA_000303175.1	GCF_000303175.1	yes	NC_000003.12	94.495	109	3.18e-40	169	bacteria
NZ_AMQR01000152.1:1-105	Sat	NZ_AMQR01000152.1	ALR	104	216	1	105	4e-26	99.4	6.1	Vibrio vulnificus B2 C224contig153, whole genome shotgun sequence	WP_049798923.1	C224contig	Vibrio vulnificus B2 (g-proteobacteria)	strain=B2	1229202	SAMN02471155	PRJNA174154	Zhejiang University	2012-10-5	n/a	major	Contig	full	IDBA-UD v. 1.0.9	100.0x	Illumina		GCA_000303175.1	GCF_000303175.1	yes	NC_000007.14	94.286	105	5.07e-38	161	bacteria
NZ_AMQV01000085.1:1-349	LINE	NZ_AMQV01000085.1	L1HS_3end	347	349	349	1	9.7e-129	436.9	14.4	Vibrio vulnificus NBRC 15645 = ATCC 27562 B736contig85, whole genome shotgun sequence		ASM29963v1	Vibrio vulnificus NBRC 15645 = ATCC 27562 (g-proteobacteria)	strain=ATCC 27562	1219061	SAMN02469425	PRJNA172642	Zhejiang University	2012-9-27	n/a	major	Contig	full	SOAPdenovo v. 1.05	100.0x	Illumina HiSeq		GCA_000299635.1	GCF_000299635.1	yes	NC_000003.12	99.713	349	0	640	bacteria
NZ_AMQV01000087.1:1-84	Sat	NZ_AMQV01000087.1	ALR	82	797	84	1	3.6e-15	63.9	5	Vibrio vulnificus NBRC 15645 = ATCC 27562 B736contig87, whole genome shotgun sequence		ASM29963v1	Vibrio vulnificus NBRC 15645 = ATCC 27562 (g-proteobacteria)	strain=ATCC 27562	1219061	SAMN02469425	PRJNA172642	Zhejiang University	2012-9-27	n/a	major	Contig	full	SOAPdenovo v. 1.05	100.0x	Illumina HiSeq		GCA_000299635.1	GCF_000299635.1	yes	NC_000002.12	98.81	84	8.01e-35	150	bacteria
NZ_AMQV01000087.1:256-426	Sat	NZ_AMQV01000087.1	ALR	170	797	426	256	3.8e-45	161.6	6.2	Vibrio vulnificus NBRC 15645 = ATCC 27562 B736contig87, whole genome shotgun sequence		ASM29963v1	Vibrio vulnificus NBRC 15645 = ATCC 27562 (g-proteobacteria)	strain=ATCC 27562	1219061	SAMN02469425	PRJNA172642	Zhejiang University	2012-9-27	n/a	major	Contig	full	SOAPdenovo v. 1.05	100.0x	Illumina HiSeq		GCA_000299635.1	GCF_000299635.1	yes	NC_000013.11	96.491	171	1.9e-74	283	bacteria
NZ_AMQV01000087.1:427-597	Sat	NZ_AMQV01000087.1	ALR	169	797	597	427	3.6e-49	174.7	5.4	Vibrio vulnificus NBRC 15645 = ATCC 27562 B736contig87, whole genome shotgun sequence		ASM29963v1	Vibrio vulnificus NBRC 15645 = ATCC 27562 (g-proteobacteria)	strain=ATCC 27562	1219061	SAMN02469425	PRJNA172642	Zhejiang University	2012-9-27	n/a	major	Contig	full	SOAPdenovo v. 1.05	100.0x	Illumina HiSeq		GCA_000299635.1	GCF_000299635.1	yes	NC_000013.11	98.83	171	4.05e-81	305	bacteria
NZ_AMQV01000087.1:598-768	Sat	NZ_AMQV01000087.1	ALR	170	797	768	598	9.1e-42	150.6	12.4	Vibrio vulnificus NBRC 15645 = ATCC 27562 B736contig87, whole genome shotgun sequence		ASM29963v1	Vibrio vulnificus NBRC 15645 = ATCC 27562 (g-proteobacteria)	strain=ATCC 27562	1219061	SAMN02469425	PRJNA172642	Zhejiang University	2012-9-27	n/a	major	Contig	full	SOAPdenovo v. 1.05	100.0x	Illumina HiSeq		GCA_000299635.1	GCF_000299635.1	yes	NC_000013.11	98.83	171	4.05e-81	305	bacteria
NZ_AMQV01000087.1:85-255	Sat	NZ_AMQV01000087.1	ALR	170	797	255	85	2.3e-37	136.2	3.6	Vibrio vulnificus NBRC 15645 = ATCC 27562 B736contig87, whole genome shotgun sequence		ASM29963v1	Vibrio vulnificus NBRC 15645 = ATCC 27562 (g-proteobacteria)	strain=ATCC 27562	1219061	SAMN02469425	PRJNA172642	Zhejiang University	2012-9-27	n/a	major	Contig	full	SOAPdenovo v. 1.05	100.0x	Illumina HiSeq		GCA_000299635.1	GCF_000299635.1	yes	NC_000020.11	99.415	171	8.71e-83	311	bacteria
NZ_AMQV01000098.1:1-157	HSATII	NZ_AMQV01000098.1	HSATII	145	560	1	157	4.2e-11	50	22.6	Vibrio vulnificus NBRC 15645 = ATCC 27562 B736contig98, whole genome shotgun sequence	WP_017428781.1	ASM29963v1	Vibrio vulnificus NBRC 15645 = ATCC 27562 (g-proteobacteria)	strain=ATCC 27562	1219061	SAMN02469425	PRJNA172642	Zhejiang University	2012-9-27	n/a	major	Contig	full	SOAPdenovo v. 1.05	100.0x	Illumina HiSeq		GCA_000299635.1	GCF_000299635.1	yes	NC_000024.10	96.528	144	3.76e-61	239	bacteria
NZ_AMQV01000098.1:222-437	HSATII	NZ_AMQV01000098.1	HSATII	162	560	222	437	1.1e-13	58.4	33.7	Vibrio vulnificus NBRC 15645 = ATCC 27562 B736contig98, whole genome shotgun sequence	WP_017428781.1	ASM29963v1	Vibrio vulnificus NBRC 15645 = ATCC 27562 (g-proteobacteria)	strain=ATCC 27562	1219061	SAMN02469425	PRJNA172642	Zhejiang University	2012-9-27	n/a	major	Contig	full	SOAPdenovo v. 1.05	100.0x	Illumina HiSeq		GCA_000299635.1	GCF_000299635.1	yes	NC_000024.10	98.086	209	8.67e-99	364	bacteria
NZ_AMQV01000106.1:1-469	LINE	NZ_AMQV01000106.1	L1P1_orf2	468	469	469	1	5.5e-170	571.8	40.5	Vibrio vulnificus NBRC 15645 = ATCC 27562 B736contig106, whole genome shotgun sequence		ASM29963v1	Vibrio vulnificus NBRC 15645 = ATCC 27562 (g-proteobacteria)	strain=ATCC 27562	1219061	SAMN02469425	PRJNA172642	Zhejiang University	2012-9-27	n/a	major	Contig	full	SOAPdenovo v. 1.05	100.0x	Illumina HiSeq		GCA_000299635.1	GCF_000299635.1	yes	NC_000004.12	99.36	469	0	850	bacteria
NZ_AMQV01000121.1:50-249	LINE	NZ_AMQV01000121.1	L1MC4_3end	178	252	249	50	7.5e-28	100.4	12.6	Vibrio vulnificus NBRC 15645 = ATCC 27562 B736contig121, whole genome shotgun sequence		ASM29963v1	Vibrio vulnificus NBRC 15645 = ATCC 27562 (g-proteobacteria)	strain=ATCC 27562	1219061	SAMN02469425	PRJNA172642	Zhejiang University	2012-9-27	n/a	major	Contig	full	SOAPdenovo v. 1.05	100.0x	Illumina HiSeq		GCA_000299635.1	GCF_000299635.1	yes	NC_000002.12	92.486	173	3e-63	246	bacteria
NZ_AMQV01000126.1:3-235	LINE	NZ_AMQV01000126.1	L1HS_3end	215	326	3	235	1.5e-27	101.9	9.6	Vibrio vulnificus NBRC 15645 = ATCC 27562 B736contig126, whole genome shotgun sequence	WP_080586424.1	ASM29963v1	Vibrio vulnificus NBRC 15645 = ATCC 27562 (g-proteobacteria)	strain=ATCC 27562	1219061	SAMN02469425	PRJNA172642	Zhejiang University	2012-9-27	n/a	major	Contig	full	SOAPdenovo v. 1.05	100.0x	Illumina HiSeq		GCA_000299635.1	GCF_000299635.1	yes	NC_000001.11	93.939	231	3.42e-93	346	bacteria
NZ_AMQV01000127.1:1-135	HSATII	NZ_AMQV01000127.1	HSATII	134	294	135	1	6.4e-30	111.3	23.1	Vibrio vulnificus NBRC 15645 = ATCC 27562 B736contig127, whole genome shotgun sequence		ASM29963v1	Vibrio vulnificus NBRC 15645 = ATCC 27562 (g-proteobacteria)	strain=ATCC 27562	1219061	SAMN02469425	PRJNA172642	Zhejiang University	2012-9-27	n/a	major	Contig	full	SOAPdenovo v. 1.05	100.0x	Illumina HiSeq		GCA_000299635.1	GCF_000299635.1	yes	NC_000007.14	91.667	132	1.92e-43	180	bacteria
NZ_AMQV01000127.1:136-294	HSATII	NZ_AMQV01000127.1	HSATII	169	294	294	136	2.9e-35	128.7	11.7	Vibrio vulnificus NBRC 15645 = ATCC 27562 B736contig127, whole genome shotgun sequence		ASM29963v1	Vibrio vulnificus NBRC 15645 = ATCC 27562 (g-proteobacteria)	strain=ATCC 27562	1219061	SAMN02469425	PRJNA172642	Zhejiang University	2012-9-27	n/a	major	Contig	full	SOAPdenovo v. 1.05	100.0x	Illumina HiSeq		GCA_000299635.1	GCF_000299635.1	yes	NC_000016.10	100	159	8.04e-78	294	bacteria
NZ_AMQV01000132.1:132-267	Sat	NZ_AMQV01000132.1	BSR	132	267	132	267	7.2e-30	111.3	1.6	Vibrio vulnificus NBRC 15645 = ATCC 27562 B736contig132, whole genome shotgun sequence		ASM29963v1	Vibrio vulnificus NBRC 15645 = ATCC 27562 (g-proteobacteria)	strain=ATCC 27562	1219061	SAMN02469425	PRJNA172642	Zhejiang University	2012-9-27	n/a	major	Contig	full	SOAPdenovo v. 1.05	100.0x	Illumina HiSeq		GCA_000299635.1	GCF_000299635.1	yes	NT_167219.1	88.235	136	2.52e-37	159	bacteria
NZ_AMQV01000132.1:4-130	Sat	NZ_AMQV01000132.1	BSR	124	267	4	130	4e-25	95.9	2.1	Vibrio vulnificus NBRC 15645 = ATCC 27562 B736contig132, whole genome shotgun sequence		ASM29963v1	Vibrio vulnificus NBRC 15645 = ATCC 27562 (g-proteobacteria)	strain=ATCC 27562	1219061	SAMN02469425	PRJNA172642	Zhejiang University	2012-9-27	n/a	major	Contig	full	SOAPdenovo v. 1.05	100.0x	Illumina HiSeq		GCA_000299635.1	GCF_000299635.1	yes	NC_000004.12	92.8	125	4.94e-44	182	bacteria
NZ_AMQV01000135.1:2-258	DNATransposon	NZ_AMQV01000135.1	Tigger1	256	261	258	2	2.2e-68	235	9	Vibrio vulnificus NBRC 15645 = ATCC 27562 B736contig135, whole genome shotgun sequence		ASM29963v1	Vibrio vulnificus NBRC 15645 = ATCC 27562 (g-proteobacteria)	strain=ATCC 27562	1219061	SAMN02469425	PRJNA172642	Zhejiang University	2012-9-27	n/a	major	Contig	full	SOAPdenovo v. 1.05	100.0x	Illumina HiSeq		GCA_000299635.1	GCF_000299635.1	yes	NC_000001.11	90.8	250	1.38e-87	327	bacteria
NZ_AMQV01000137.1:45-251	LINE	NZ_AMQV01000137.1	L1P1_orf2	167	253	251	45	2.4e-11	45.3	24.6	Vibrio vulnificus NBRC 15645 = ATCC 27562 B736contig137, whole genome shotgun sequence		ASM29963v1	Vibrio vulnificus NBRC 15645 = ATCC 27562 (g-proteobacteria)	strain=ATCC 27562	1219061	SAMN02469425	PRJNA172642	Zhejiang University	2012-9-27	n/a	major	Contig	full	SOAPdenovo v. 1.05	100.0x	Illumina HiSeq		GCA_000299635.1	GCF_000299635.1	yes	NC_000008.11	93.514	185	6.66e-70	268	bacteria
NZ_AMQV01000143.1:3-223	LINE	NZ_AMQV01000143.1	L1P1_orf2	209	241	223	3	2.3e-33	118.4	24.9	Vibrio vulnificus NBRC 15645 = ATCC 27562 B736contig143, whole genome shotgun sequence		ASM29963v1	Vibrio vulnificus NBRC 15645 = ATCC 27562 (g-proteobacteria)	strain=ATCC 27562	1219061	SAMN02469425	PRJNA172642	Zhejiang University	2012-9-27	n/a	major	Contig	full	SOAPdenovo v. 1.05	100.0x	Illumina HiSeq		GCA_000299635.1	GCF_000299635.1	yes	NC_000015.10	93.396	212	9.09e-84	315	bacteria
NZ_AMQV01000144.1:1-84	Sat	NZ_AMQV01000144.1	ALR	83	234	84	1	8.9e-13	56.1	5.2	Vibrio vulnificus NBRC 15645 = ATCC 27562 B736contig144, whole genome shotgun sequence		ASM29963v1	Vibrio vulnificus NBRC 15645 = ATCC 27562 (g-proteobacteria)	strain=ATCC 27562	1219061	SAMN02469425	PRJNA172642	Zhejiang University	2012-9-27	n/a	major	Contig	full	SOAPdenovo v. 1.05	100.0x	Illumina HiSeq		GCA_000299635.1	GCF_000299635.1	yes	NC_000015.10	98.81	84	8.01e-35	150	bacteria
NZ_AMQV01000144.1:85-234	Sat	NZ_AMQV01000144.1	ALR	149	234	234	85	7.4e-40	144.4	8.9	Vibrio vulnificus NBRC 15645 = ATCC 27562 B736contig144, whole genome shotgun sequence		ASM29963v1	Vibrio vulnificus NBRC 15645 = ATCC 27562 (g-proteobacteria)	strain=ATCC 27562	1219061	SAMN02469425	PRJNA172642	Zhejiang University	2012-9-27	n/a	major	Contig	full	SOAPdenovo v. 1.05	100.0x	Illumina HiSeq		GCA_000299635.1	GCF_000299635.1	yes	NC_000009.12	97.333	150	3.53e-66	255	bacteria
NZ_AMQV01000145.1:59-226	Sat	NZ_AMQV01000145.1	ALR	168	226	226	59	6.4e-40	144.5	7.4	Vibrio vulnificus NBRC 15645 = ATCC 27562 B736contig145, whole genome shotgun sequence		ASM29963v1	Vibrio vulnificus NBRC 15645 = ATCC 27562 (g-proteobacteria)	strain=ATCC 27562	1219061	SAMN02469425	PRJNA172642	Zhejiang University	2012-9-27	n/a	major	Contig	full	SOAPdenovo v. 1.05	100.0x	Illumina HiSeq		GCA_000299635.1	GCF_000299635.1	yes	NC_000012.12	100	168	8.53e-83	311	bacteria
NZ_AMQV01000146.1:55-226	HSATII	NZ_AMQV01000146.1	HSATII	163	226	55	226	1.6e-12	54.6	23.4	Vibrio vulnificus NBRC 15645 = ATCC 27562 B736contig146, whole genome shotgun sequence	WP_017428793.1	ASM29963v1	Vibrio vulnificus NBRC 15645 = ATCC 27562 (g-proteobacteria)	strain=ATCC 27562	1219061	SAMN02469425	PRJNA172642	Zhejiang University	2012-9-27	n/a	major	Contig	full	SOAPdenovo v. 1.05	100.0x	Illumina HiSeq		GCA_000299635.1	GCF_000299635.1	yes	NT_187425.1	95.322	171	1.49e-70	270	bacteria
NZ_AMQV01000149.1:98-222	Alu	NZ_AMQV01000149.1	AluY	118	222	222	98	8.7e-34	124.1	8	Vibrio vulnificus NBRC 15645 = ATCC 27562 B736contig149, whole genome shotgun sequence		ASM29963v1	Vibrio vulnificus NBRC 15645 = ATCC 27562 (g-proteobacteria)	strain=ATCC 27562	1219061	SAMN02469425	PRJNA172642	Zhejiang University	2012-9-27	n/a	major	Contig	full	SOAPdenovo v. 1.05	100.0x	Illumina HiSeq		GCA_000299635.1	GCF_000299635.1	yes	NC_000017.11	100	115	1.71e-53	213	bacteria
NZ_AMQV01000154.1:1-208	LTR	NZ_AMQV01000154.1	THE1-int	205	209	208	1	9e-55	190.4	2	Vibrio vulnificus NBRC 15645 = ATCC 27562 B736contig154, whole genome shotgun sequence		ASM29963v1	Vibrio vulnificus NBRC 15645 = ATCC 27562 (g-proteobacteria)	strain=ATCC 27562	1219061	SAMN02469425	PRJNA172642	Zhejiang University	2012-9-27	n/a	major	Contig	full	SOAPdenovo v. 1.05	100.0x	Illumina HiSeq		GCA_000299635.1	GCF_000299635.1	yes	NC_000022.11	95.122	205	1.41e-86	324	bacteria
NZ_AMQV01000155.1:1-192	LINE	NZ_AMQV01000155.1	L1HS_5end	169	204	1	192	1.4e-44	156.8	16.1	Vibrio vulnificus NBRC 15645 = ATCC 27562 B736contig155, whole genome shotgun sequence		ASM29963v1	Vibrio vulnificus NBRC 15645 = ATCC 27562 (g-proteobacteria)	strain=ATCC 27562	1219061	SAMN02469425	PRJNA172642	Zhejiang University	2012-9-27	n/a	major	Contig	full	SOAPdenovo v. 1.05	100.0x	Illumina HiSeq		GCA_000299635.1	GCF_000299635.1	yes	NC_000023.11	97.076	171	4.68e-76	289	bacteria
NZ_AMRJ01000061.1:542-2984	LINE	NZ_AMRJ01000061.1	L1P1_orf2	2442	2984	2984	542	0	3095.8	229.6	Alcanivorax hongdengensis A-11-3 contig62, whole genome shotgun sequence	WP_008930570.1	ASM30099v1	Alcanivorax hongdengensis A-11-3 (g-proteobacteria)	strain=A-11-3	1177179	SAMN02471206	PRJNA161091	The Third Institute of State Oceanic Administration (SOA)	2012-10-2	n/a	major	Contig	full	SOAPdenovo v. 1.05	143x	Illumina GA IIX	Representative Genome	GCA_000300995.1	GCF_000300995.1	yes	NC_000020.11	98.485	2443	0	4307	bacteria
NZ_AMRJ01000068.1:1389-1563	HSATII	NZ_AMRJ01000068.1	HSATII	151	1667	1563	1389	5.4e-13	54.7	21.3	Alcanivorax hongdengensis A-11-3 contig69, whole genome shotgun sequence		ASM30099v1	Alcanivorax hongdengensis A-11-3 (g-proteobacteria)	strain=A-11-3	1177179	SAMN02471206	PRJNA161091	The Third Institute of State Oceanic Administration (SOA)	2012-10-2	n/a	major	Contig	full	SOAPdenovo v. 1.05	143x	Illumina GA IIX	Representative Genome	GCA_000300995.1	GCF_000300995.1	yes	NT_187425.1	98.286	175	1.16e-81	307	bacteria
NZ_AMRJ01000068.1:335-555	HSATII	NZ_AMRJ01000068.1	HSATII	162	1667	555	335	1.5e-17	69.5	25.2	Alcanivorax hongdengensis A-11-3 contig69, whole genome shotgun sequence		ASM30099v1	Alcanivorax hongdengensis A-11-3 (g-proteobacteria)	strain=A-11-3	1177179	SAMN02471206	PRJNA161091	The Third Institute of State Oceanic Administration (SOA)	2012-10-2	n/a	major	Contig	full	SOAPdenovo v. 1.05	143x	Illumina GA IIX	Representative Genome	GCA_000300995.1	GCF_000300995.1	yes	NT_187425.1	100	221	4.05e-112	409	bacteria
NZ_AMRJ01000068.1:671-832	HSATII	NZ_AMRJ01000068.1	HSATII	165	1667	832	671	9.6e-15	60.4	18.6	Alcanivorax hongdengensis A-11-3 contig69, whole genome shotgun sequence		ASM30099v1	Alcanivorax hongdengensis A-11-3 (g-proteobacteria)	strain=A-11-3	1177179	SAMN02471206	PRJNA161091	The Third Institute of State Oceanic Administration (SOA)	2012-10-2	n/a	major	Contig	full	SOAPdenovo v. 1.05	143x	Illumina GA IIX	Representative Genome	GCA_000300995.1	GCF_000300995.1	yes	NT_187425.1	90.741	162	1.43e-50	204	bacteria
NZ_AMRJ01000068.1:909-1116	HSATII	NZ_AMRJ01000068.1	HSATII	164	1667	1116	909	1e-14	60.3	23.2	Alcanivorax hongdengensis A-11-3 contig69, whole genome shotgun sequence		ASM30099v1	Alcanivorax hongdengensis A-11-3 (g-proteobacteria)	strain=A-11-3	1177179	SAMN02471206	PRJNA161091	The Third Institute of State Oceanic Administration (SOA)	2012-10-2	n/a	major	Contig	full	SOAPdenovo v. 1.05	143x	Illumina GA IIX	Representative Genome	GCA_000300995.1	GCF_000300995.1	yes	NT_187425.1	100	208	6.37e-105	385	bacteria
NZ_AMRJ01000070.1:1018-1188	Sat	NZ_AMRJ01000070.1	ALR	169	1382	1188	1018	5.7e-47	166.1	3.7	Alcanivorax hongdengensis A-11-3 contig71, whole genome shotgun sequence		ASM30099v1	Alcanivorax hongdengensis A-11-3 (g-proteobacteria)	strain=A-11-3	1177179	SAMN02471206	PRJNA161091	The Third Institute of State Oceanic Administration (SOA)	2012-10-2	n/a	major	Contig	full	SOAPdenovo v. 1.05	143x	Illumina GA IIX	Representative Genome	GCA_000300995.1	GCF_000300995.1	yes	NC_000013.11	100	171	1.87e-84	316	bacteria
NZ_AMRJ01000070.1:1-167	Sat	NZ_AMRJ01000070.1	ALR	166	1382	167	1	8.2e-42	149.3	6.9	Alcanivorax hongdengensis A-11-3 contig71, whole genome shotgun sequence		ASM30099v1	Alcanivorax hongdengensis A-11-3 (g-proteobacteria)	strain=A-11-3	1177179	SAMN02471206	PRJNA161091	The Third Institute of State Oceanic Administration (SOA)	2012-10-2	n/a	major	Contig	full	SOAPdenovo v. 1.05	143x	Illumina GA IIX	Representative Genome	GCA_000300995.1	GCF_000300995.1	yes	NC_000013.11	100	167	3.05e-82	309	bacteria
NZ_AMRJ01000070.1:1189-1359	Sat	NZ_AMRJ01000070.1	ALR	170	1382	1359	1189	3.8e-40	143.9	11.8	Alcanivorax hongdengensis A-11-3 contig71, whole genome shotgun sequence		ASM30099v1	Alcanivorax hongdengensis A-11-3 (g-proteobacteria)	strain=A-11-3	1177179	SAMN02471206	PRJNA161091	The Third Institute of State Oceanic Administration (SOA)	2012-10-2	n/a	major	Contig	full	SOAPdenovo v. 1.05	143x	Illumina GA IIX	Representative Genome	GCA_000300995.1	GCF_000300995.1	yes	NC_000013.11	100	171	1.87e-84	316	bacteria
NZ_AMRJ01000070.1:168-333	Sat	NZ_AMRJ01000070.1	ALR	170	1382	333	168	3.9e-34	124.3	6.5	Alcanivorax hongdengensis A-11-3 contig71, whole genome shotgun sequence		ASM30099v1	Alcanivorax hongdengensis A-11-3 (g-proteobacteria)	strain=A-11-3	1177179	SAMN02471206	PRJNA161091	The Third Institute of State Oceanic Administration (SOA)	2012-10-2	n/a	major	Contig	full	SOAPdenovo v. 1.05	143x	Illumina GA IIX	Representative Genome	GCA_000300995.1	GCF_000300995.1	yes	NC_000013.11	100	166	1.09e-81	307	bacteria
NZ_AMRJ01000070.1:334-504	Sat	NZ_AMRJ01000070.1	ALR	170	1382	504	334	4.2e-48	169.8	5.1	Alcanivorax hongdengensis A-11-3 contig71, whole genome shotgun sequence		ASM30099v1	Alcanivorax hongdengensis A-11-3 (g-proteobacteria)	strain=A-11-3	1177179	SAMN02471206	PRJNA161091	The Third Institute of State Oceanic Administration (SOA)	2012-10-2	n/a	major	Contig	full	SOAPdenovo v. 1.05	143x	Illumina GA IIX	Representative Genome	GCA_000300995.1	GCF_000300995.1	yes	NC_000013.11	100	171	1.87e-84	316	bacteria
NZ_AMRJ01000070.1:505-675	Sat	NZ_AMRJ01000070.1	ALR	170	1382	675	505	3.6e-43	153.7	11.2	Alcanivorax hongdengensis A-11-3 contig71, whole genome shotgun sequence		ASM30099v1	Alcanivorax hongdengensis A-11-3 (g-proteobacteria)	strain=A-11-3	1177179	SAMN02471206	PRJNA161091	The Third Institute of State Oceanic Administration (SOA)	2012-10-2	n/a	major	Contig	full	SOAPdenovo v. 1.05	143x	Illumina GA IIX	Representative Genome	GCA_000300995.1	GCF_000300995.1	yes	NC_000013.11	100	171	1.87e-84	316	bacteria
NZ_AMRJ01000070.1:676-846	Sat	NZ_AMRJ01000070.1	ALR	170	1382	846	676	3.9e-40	143.8	3.5	Alcanivorax hongdengensis A-11-3 contig71, whole genome shotgun sequence		ASM30099v1	Alcanivorax hongdengensis A-11-3 (g-proteobacteria)	strain=A-11-3	1177179	SAMN02471206	PRJNA161091	The Third Institute of State Oceanic Administration (SOA)	2012-10-2	n/a	major	Contig	full	SOAPdenovo v. 1.05	143x	Illumina GA IIX	Representative Genome	GCA_000300995.1	GCF_000300995.1	yes	NC_000013.11	100	171	1.87e-84	316	bacteria
NZ_AMRJ01000070.1:847-1017	Sat	NZ_AMRJ01000070.1	ALR	170	1382	1017	847	9.8e-44	155.6	6.8	Alcanivorax hongdengensis A-11-3 contig71, whole genome shotgun sequence		ASM30099v1	Alcanivorax hongdengensis A-11-3 (g-proteobacteria)	strain=A-11-3	1177179	SAMN02471206	PRJNA161091	The Third Institute of State Oceanic Administration (SOA)	2012-10-2	n/a	major	Contig	full	SOAPdenovo v. 1.05	143x	Illumina GA IIX	Representative Genome	GCA_000300995.1	GCF_000300995.1	yes	NC_000013.11	100	171	1.87e-84	316	bacteria
NZ_AMRJ01000081.1:490-809	Alu	NZ_AMRJ01000081.1	AluSg	285	927	490	809	4.1e-66	228.8	6.2	Alcanivorax hongdengensis A-11-3 contig85, whole genome shotgun sequence		ASM30099v1	Alcanivorax hongdengensis A-11-3 (g-proteobacteria)	strain=A-11-3	1177179	SAMN02471206	PRJNA161091	The Third Institute of State Oceanic Administration (SOA)	2012-10-2	n/a	major	Contig	full	SOAPdenovo v. 1.05	143x	Illumina GA IIX	Representative Genome	GCA_000300995.1	GCF_000300995.1	yes	NW_009646209.1	94.286	315	1.28e-133	481	bacteria
NZ_AMRJ01000086.1:175-343	Sat	NZ_AMRJ01000086.1	ALR	170	682	343	175	4.1e-40	143.8	7.1	Alcanivorax hongdengensis A-11-3 contig91, whole genome shotgun sequence		ASM30099v1	Alcanivorax hongdengensis A-11-3 (g-proteobacteria)	strain=A-11-3	1177179	SAMN02471206	PRJNA161091	The Third Institute of State Oceanic Administration (SOA)	2012-10-2	n/a	major	Contig	full	SOAPdenovo v. 1.05	143x	Illumina GA IIX	Representative Genome	GCA_000300995.1	GCF_000300995.1	yes	NC_000012.12	99.408	169	1.11e-81	307	bacteria
NZ_AMRJ01000086.1:345-517	Sat	NZ_AMRJ01000086.1	ALR	167	682	517	345	2e-34	125.3	5.2	Alcanivorax hongdengensis A-11-3 contig91, whole genome shotgun sequence		ASM30099v1	Alcanivorax hongdengensis A-11-3 (g-proteobacteria)	strain=A-11-3	1177179	SAMN02471206	PRJNA161091	The Third Institute of State Oceanic Administration (SOA)	2012-10-2	n/a	major	Contig	full	SOAPdenovo v. 1.05	143x	Illumina GA IIX	Representative Genome	GCA_000300995.1	GCF_000300995.1	yes	NC_000012.12	97.688	173	8.9e-78	294	bacteria
NZ_AMRJ01000086.1:5-173	Sat	NZ_AMRJ01000086.1	ALR	168	682	173	5	7.1e-40	143	7.6	Alcanivorax hongdengensis A-11-3 contig91, whole genome shotgun sequence		ASM30099v1	Alcanivorax hongdengensis A-11-3 (g-proteobacteria)	strain=A-11-3	1177179	SAMN02471206	PRJNA161091	The Third Institute of State Oceanic Administration (SOA)	2012-10-2	n/a	major	Contig	full	SOAPdenovo v. 1.05	143x	Illumina GA IIX	Representative Genome	GCA_000300995.1	GCF_000300995.1	yes	NC_000012.12	100	169	2.39e-83	313	bacteria
NZ_AMRJ01000086.1:519-682	Sat	NZ_AMRJ01000086.1	ALR	165	682	682	519	1e-35	129.5	5.5	Alcanivorax hongdengensis A-11-3 contig91, whole genome shotgun sequence		ASM30099v1	Alcanivorax hongdengensis A-11-3 (g-proteobacteria)	strain=A-11-3	1177179	SAMN02471206	PRJNA161091	The Third Institute of State Oceanic Administration (SOA)	2012-10-2	n/a	major	Contig	full	SOAPdenovo v. 1.05	143x	Illumina GA IIX	Representative Genome	GCA_000300995.1	GCF_000300995.1	yes	NC_000012.12	100	164	1.39e-80	303	bacteria
NZ_AMRJ01000089.1:151-287	Sat	NZ_AMRJ01000089.1	ALR	134	628	287	151	8.9e-29	106.8	3.7	Alcanivorax hongdengensis A-11-3 contig94, whole genome shotgun sequence		ASM30099v1	Alcanivorax hongdengensis A-11-3 (g-proteobacteria)	strain=A-11-3	1177179	SAMN02471206	PRJNA161091	The Third Institute of State Oceanic Administration (SOA)	2012-10-2	n/a	major	Contig	full	SOAPdenovo v. 1.05	143x	Illumina GA IIX	Representative Genome	GCA_000300995.1	GCF_000300995.1	yes	NC_000020.11	100	135	1.47e-64	250	bacteria
NZ_AMRJ01000089.1:1-85	Sat	NZ_AMRJ01000089.1	ALR	84	628	85	1	1.6e-14	60.4	5.3	Alcanivorax hongdengensis A-11-3 contig94, whole genome shotgun sequence		ASM30099v1	Alcanivorax hongdengensis A-11-3 (g-proteobacteria)	strain=A-11-3	1177179	SAMN02471206	PRJNA161091	The Third Institute of State Oceanic Administration (SOA)	2012-10-2	n/a	major	Contig	full	SOAPdenovo v. 1.05	143x	Illumina GA IIX	Representative Genome	GCA_000300995.1	GCF_000300995.1	yes	NC_000020.11	100	85	4.87e-37	158	bacteria
NZ_AMRJ01000089.1:288-454	Sat	NZ_AMRJ01000089.1	ALR	169	628	454	288	3.1e-33	121.4	7.7	Alcanivorax hongdengensis A-11-3 contig94, whole genome shotgun sequence		ASM30099v1	Alcanivorax hongdengensis A-11-3 (g-proteobacteria)	strain=A-11-3	1177179	SAMN02471206	PRJNA161091	The Third Institute of State Oceanic Administration (SOA)	2012-10-2	n/a	major	Contig	full	SOAPdenovo v. 1.05	143x	Illumina GA IIX	Representative Genome	GCA_000300995.1	GCF_000300995.1	yes	NC_000020.11	100	167	3.05e-82	309	bacteria
NZ_AMRJ01000089.1:455-625	Sat	NZ_AMRJ01000089.1	ALR	170	628	625	455	7.6e-37	133.1	3.6	Alcanivorax hongdengensis A-11-3 contig94, whole genome shotgun sequence		ASM30099v1	Alcanivorax hongdengensis A-11-3 (g-proteobacteria)	strain=A-11-3	1177179	SAMN02471206	PRJNA161091	The Third Institute of State Oceanic Administration (SOA)	2012-10-2	n/a	major	Contig	full	SOAPdenovo v. 1.05	143x	Illumina GA IIX	Representative Genome	GCA_000300995.1	GCF_000300995.1	yes	NC_000020.11	100	171	1.87e-84	316	bacteria
NZ_ANGH02000119.1:1-175	HSATII	NZ_ANGH02000119.1	HSATII	168	567	175	1	2.7e-41	148	18	Klebsiella pneumoniae JHCK1 MTE1.contig207, whole genome shotgun sequence	WP_004195543.1	MTE1_ImprovedAssembly	Klebsiella pneumoniae JHCK1 (enterobacteria)	strain=JHCK1	1236101	SAMN01939166	PRJNA176122	Los Alamos National Laboratory	2013-3-8	n/a	major	Contig	full	Velvet v. 2013	300.0x	Illumina HiSeq		GCA_000316265.2	GCF_000316265.2	yes	NC_000001.11	100	175	1.15e-86	324	bacteria
NZ_ANGH02000119.1:401-567	HSATII	NZ_ANGH02000119.1	HSATII	159	567	567	401	2.5e-40	144.9	12.1	Klebsiella pneumoniae JHCK1 MTE1.contig207, whole genome shotgun sequence	WP_004195543.1	MTE1_ImprovedAssembly	Klebsiella pneumoniae JHCK1 (enterobacteria)	strain=JHCK1	1236101	SAMN01939166	PRJNA176122	Los Alamos National Laboratory	2013-3-8	n/a	major	Contig	full	Velvet v. 2013	300.0x	Illumina HiSeq		GCA_000316265.2	GCF_000316265.2	yes	NC_000001.11	100	167	3.05e-82	309	bacteria
NZ_AOHQ01000007.1:1-214	HSATII	NZ_AOHQ01000007.1	HSATII	157	221	214	1	1e-14	61.8	25.2	Mycobacterium sp. VKM Ac-1816D NODE_583_length_221_cov_0.621795, whole genome shotgun sequence		M6May	Mycobacterium sp. VKM Ac-1816D (high GC Gram+)	strain=VKM Ac-1816D	1273686	SAMN02469804	PRJNA183984	Center of Innovations and Technologies “Biologically active compounds and their applications”	2013-6-28	n/a	major	Contig	full	Velvet v. 1.2.03	200.0x	Illumina GAIIx; Illumina HiSeq		GCA_000416385.1	GCF_000416385.1	yes	NC_000002.12	85.845	219	1.52e-56	224	bacteria
NZ_AOHQ01000014.1:3-170	HSATII	NZ_AOHQ01000014.1	HSATII	161	262	170	3	2e-11	51.1	26.6	Mycobacterium sp. VKM Ac-1816D NODE_615_length_262_cov_0.411168, whole genome shotgun sequence		M6May	Mycobacterium sp. VKM Ac-1816D (high GC Gram+)	strain=VKM Ac-1816D	1273686	SAMN02469804	PRJNA183984	Center of Innovations and Technologies “Biologically active compounds and their applications”	2013-6-28	n/a	major	Contig	full	Velvet v. 1.2.03	200.0x	Illumina GAIIx; Illumina HiSeq		GCA_000416385.1	GCF_000416385.1	yes	NC_000004.12	86.145	166	1.17e-41	174	bacteria
NZ_AOHQ01000069.1:68-316	Alu	NZ_AOHQ01000069.1	AluSx	252	318	68	316	1.2e-67	235.3	4.9	Mycobacterium sp. VKM Ac-1816D NODE_1147_length_318_cov_0.557312, whole genome shotgun sequence		M6May	Mycobacterium sp. VKM Ac-1816D (high GC Gram+)	strain=VKM Ac-1816D	1273686	SAMN02469804	PRJNA183984	Center of Innovations and Technologies “Biologically active compounds and their applications”	2013-6-28	n/a	major	Contig	full	Velvet v. 1.2.03	200.0x	Illumina GAIIx; Illumina HiSeq		GCA_000416385.1	GCF_000416385.1	yes	NC_000020.11	96.059	203	1.03e-88	331	bacteria
NZ_APIB01000016.1:1-1739	LINE	NZ_APIB01000016.1	L1P1_orf2	1748	1860	1	1739	0	2128.3	154.4	Listeria monocytogenes SHL001 contig16, whole genome shotgun sequence		L_monocytogenes_SHL001_v1.0	Listeria monocytogenes SHL001 (firmicutes)	strain=SHL001	1302622	SAMN03265950	PRJNA192431	University of Maryland, College Park	2014-12-15	n/a	major	Contig	full	Newbler v. 2.6	95.0x	Illumina MiSeq		GCA_000801405.1	GCF_000801405.1	yes	NC_000001.11	97.543	1750	0	2983	bacteria
NZ_APIB01000023.1:1-467	LINE	NZ_APIB01000023.1	L1HS_5end	467	634	1	467	5e-164	552.8	37.1	Listeria monocytogenes SHL001 contig25, whole genome shotgun sequence	WP_077917101.1	L_monocytogenes_SHL001_v1.0	Listeria monocytogenes SHL001 (firmicutes)	strain=SHL001	1302622	SAMN03265950	PRJNA192431	University of Maryland, College Park	2014-12-15	n/a	major	Contig	full	Newbler v. 2.6	95.0x	Illumina MiSeq		GCA_000801405.1	GCF_000801405.1	yes	NC_000008.11	98.721	469	0	830	bacteria
NZ_APID01000017.1:1-680	LINE	NZ_APID01000017.1	L1P1_orf2	679	680	680	1	3.2e-241	808.1	73.2	Listeria monocytogenes SHL004 contig17, whole genome shotgun sequence		L_monocytogenes_SHL004_v1.0	Listeria monocytogenes SHL004 (firmicutes)	strain=SHL004	1302624	SAMN03265956	PRJNA192199	University of Maryland, College Park	2014-12-15	n/a	major	Contig	full	Newbler v. 2.6	70.0x	Illumina MiSeq		GCA_000801375.1	GCF_000801375.1	yes	NC_000007.14	98.532	681	0	1201	bacteria
NZ_APIF01000022.1:1-620	LINE	NZ_APIF01000022.1	L1P1_orf2	619	620	1	620	2e-223	749	65.2	Listeria monocytogenes SHL006 contig22, whole genome shotgun sequence		L_monocytogenes_SHL006_v1.0	Listeria monocytogenes SHL006 (firmicutes)	strain=SHL006	1302626	SAMN03265952	PRJNA192202	University of Maryland, College Park	2014-12-15	n/a	major	Contig	full	Newbler v. 2.6	73.0x	Illumina MiSeq		GCA_000801455.1	GCF_000801455.1	yes	NC_000002.12	99.678	621	0	1134	bacteria
NZ_APIF01000023.1:1-596	LINE	NZ_APIF01000023.1	L1HS_5end	557	598	596	1	1.6e-106	362.1	63.2	Listeria monocytogenes SHL006 contig23, whole genome shotgun sequence		L_monocytogenes_SHL006_v1.0	Listeria monocytogenes SHL006 (firmicutes)	strain=SHL006	1302626	SAMN03265952	PRJNA192202	University of Maryland, College Park	2014-12-15	n/a	major	Contig	full	Newbler v. 2.6	73.0x	Illumina MiSeq		GCA_000801455.1	GCF_000801455.1	yes	NC_000014.9	94.833	600	0	931	bacteria
NZ_APIF01000024.1:137-342	LINE	NZ_APIF01000024.1	L1HS_5end	183	589	137	342	1e-27	100.7	4	Listeria monocytogenes SHL006 contig24, whole genome shotgun sequence		L_monocytogenes_SHL006_v1.0	Listeria monocytogenes SHL006 (firmicutes)	strain=SHL006	1302626	SAMN03265952	PRJNA192202	University of Maryland, College Park	2014-12-15	n/a	major	Contig	full	Newbler v. 2.6	73.0x	Illumina MiSeq		GCA_000801455.1	GCF_000801455.1	yes	NC_000003.12	95.074	203	6.48e-85	318	bacteria
NZ_APIF01000024.1:433-589	LINE	NZ_APIF01000024.1	L1HS_5end	110	589	433	589	2.1e-14	56.6	12.7	Listeria monocytogenes SHL006 contig24, whole genome shotgun sequence		L_monocytogenes_SHL006_v1.0	Listeria monocytogenes SHL006 (firmicutes)	strain=SHL006	1302626	SAMN03265952	PRJNA192202	University of Maryland, College Park	2014-12-15	n/a	major	Contig	full	Newbler v. 2.6	73.0x	Illumina MiSeq		GCA_000801455.1	GCF_000801455.1	yes	NC_000007.14	98.089	157	3.71e-71	272	bacteria
NZ_APIF01000025.1:1-582	LINE	NZ_APIF01000025.1	L1P1_orf2	579	582	582	1	1.3e-207	696.6	69.7	Listeria monocytogenes SHL006 contig25, whole genome shotgun sequence		L_monocytogenes_SHL006_v1.0	Listeria monocytogenes SHL006 (firmicutes)	strain=SHL006	1302626	SAMN03265952	PRJNA192202	University of Maryland, College Park	2014-12-15	n/a	major	Contig	full	Newbler v. 2.6	73.0x	Illumina MiSeq		GCA_000801455.1	GCF_000801455.1	yes	NC_000004.12	99.656	582	0	1064	bacteria
NZ_APIF01000026.1:1-564	LINE	NZ_APIF01000026.1	L1P1_orf2	564	564	1	564	4.3e-209	701.5	37.2	Listeria monocytogenes SHL006 contig26, whole genome shotgun sequence		L_monocytogenes_SHL006_v1.0	Listeria monocytogenes SHL006 (firmicutes)	strain=SHL006	1302626	SAMN03265952	PRJNA192202	University of Maryland, College Park	2014-12-15	n/a	major	Contig	full	Newbler v. 2.6	73.0x	Illumina MiSeq		GCA_000801455.1	GCF_000801455.1	yes	NC_000016.10	99.469	565	0	1026	bacteria
NZ_APIF01000027.1:59-551	LINE	NZ_APIF01000027.1	L1P1_orf2	492	551	59	551	1.1e-176	593.9	51.6	Listeria monocytogenes SHL006 contig27, whole genome shotgun sequence		L_monocytogenes_SHL006_v1.0	Listeria monocytogenes SHL006 (firmicutes)	strain=SHL006	1302626	SAMN03265952	PRJNA192202	University of Maryland, College Park	2014-12-15	n/a	major	Contig	full	Newbler v. 2.6	73.0x	Illumina MiSeq		GCA_000801455.1	GCF_000801455.1	yes	NC_000001.11	99.797	493	0	905	bacteria
NZ_APIF01000029.1:1-518	LINE	NZ_APIF01000029.1	L1HS_5end	516	518	1	518	1.1e-189	637.9	40.8	Listeria monocytogenes SHL006 contig30, whole genome shotgun sequence		L_monocytogenes_SHL006_v1.0	Listeria monocytogenes SHL006 (firmicutes)	strain=SHL006	1302626	SAMN03265952	PRJNA192202	University of Maryland, College Park	2014-12-15	n/a	major	Contig	full	Newbler v. 2.6	73.0x	Illumina MiSeq		GCA_000801455.1	GCF_000801455.1	yes	NC_000003.12	98.842	518	0	922	bacteria
NZ_APIG01000023.1:1-1114	LINE	NZ_APIG01000023.1	L1P1_orf2	1116	1114	1	1114	0	1296.2	118.3	Listeria monocytogenes SHL007 contig24, whole genome shotgun sequence		L_monocytogenes_SHL007_v1.0	Listeria monocytogenes SHL007 (firmicutes)	strain=SHL007	1302627	SAMN03265959	PRJNA192203	University of Maryland, College Park	2014-12-15	n/a	major	Contig	full	Newbler v. 2.6	96.0x	Illumina MiSeq		GCA_000801475.1	GCF_000801475.1	yes	NC_000003.12	96.789	1121	0	1860	bacteria
NZ_APIG01000030.1:12-809	LINE	NZ_APIG01000030.1	L1P1_orf2	787	809	12	809	1.1e-285	955.7	62.4	Listeria monocytogenes SHL007 contig32, whole genome shotgun sequence		L_monocytogenes_SHL007_v1.0	Listeria monocytogenes SHL007 (firmicutes)	strain=SHL007	1302627	SAMN03265959	PRJNA192203	University of Maryland, College Park	2014-12-15	n/a	major	Contig	full	Newbler v. 2.6	96.0x	Illumina MiSeq		GCA_000801475.1	GCF_000801475.1	yes	NC_000003.12	97.081	788	0	1327	bacteria
NZ_APIH01000023.1:1-599	LINE	NZ_APIH01000023.1	L1P1_orf2	606	599	599	1	5.5e-205	687.8	62.6	Listeria monocytogenes SHL008 contig25, whole genome shotgun sequence	WP_039381768.1	L_monocytogenes_SHL008_v1.0	Listeria monocytogenes SHL008 (firmicutes)	strain=SHL008	1302628	SAMN03265958	PRJNA192204	University of Maryland, College Park	2014-12-15	n/a	major	Contig	full	Newbler v. 2.6	77.0x	Illumina MiSeq		GCA_000801485.1	GCF_000801485.1	yes	NC_000001.11	97.199	607	0	1020	bacteria
NZ_APII01000010.1:1-1522	LINE	NZ_APII01000010.1	L1P1_orf2	1518	1522	1522	1	0	1924.7	131.8	Listeria monocytogenes SHL009 contig10, whole genome shotgun sequence		L_monocytogenes_SHL009_v1.0	Listeria monocytogenes SHL009 (firmicutes)	strain=SHL009	1302629	SAMN03265953	PRJNA192206	University of Maryland, College Park	2014-12-15	n/a	major	Contig	full	Newbler v. 2.6	84.0x	Illumina MiSeq		GCA_000801525.1	GCF_000801525.1	yes	NC_000010.11	98.752	1522	0	2704	bacteria
NZ_APII01000020.1:1-664	LINE	NZ_APII01000020.1	L1P1_orf2	664	664	1	664	1e-232	779.9	94.6	Listeria monocytogenes SHL009 contig22, whole genome shotgun sequence		L_monocytogenes_SHL009_v1.0	Listeria monocytogenes SHL009 (firmicutes)	strain=SHL009	1302629	SAMN03265953	PRJNA192206	University of Maryland, College Park	2014-12-15	n/a	major	Contig	full	Newbler v. 2.6	84.0x	Illumina MiSeq		GCA_000801525.1	GCF_000801525.1	yes	NC_000009.12	99.699	665	0	1216	bacteria
NZ_APII01000028.1:1-524	LINE	NZ_APII01000028.1	L1P1_orf2	525	524	1	524	2.5e-182	612.7	55.8	Listeria monocytogenes SHL009 contig30, whole genome shotgun sequence		L_monocytogenes_SHL009_v1.0	Listeria monocytogenes SHL009 (firmicutes)	strain=SHL009	1302629	SAMN03265953	PRJNA192206	University of Maryland, College Park	2014-12-15	n/a	major	Contig	full	Newbler v. 2.6	84.0x	Illumina MiSeq		GCA_000801525.1	GCF_000801525.1	yes	NC_000001.11	99.431	527	0	953	bacteria
NZ_APIJ01000041.1:1-1248	LINE	NZ_APIJ01000041.1	L1P1_orf2	1246	1248	1248	1	0	1526.6	141.5	Listeria monocytogenes SHL010 contig42, whole genome shotgun sequence		L_monocytogenes_SHL010_v1.0	Listeria monocytogenes SHL010 (firmicutes)	strain=SHL010	1302630	SAMN03265955	PRJNA192207	University of Maryland, College Park	2014-12-15	n/a	major	Contig	full	Newbler v. 2.6	77.0x	Illumina MiSeq		GCA_000801515.1	GCF_000801515.1	yes	NC_000002.12	99.199	1249	0	2250	bacteria
NZ_APIJ01000045.1:1-805	LINE	NZ_APIJ01000045.1	L1P1_orf2	806	805	1	805	2.7e-294	984.3	75.5	Listeria monocytogenes SHL010 contig53, whole genome shotgun sequence		L_monocytogenes_SHL010_v1.0	Listeria monocytogenes SHL010 (firmicutes)	strain=SHL010	1302630	SAMN03265955	PRJNA192207	University of Maryland, College Park	2014-12-15	n/a	major	Contig	full	Newbler v. 2.6	77.0x	Illumina MiSeq		GCA_000801515.1	GCF_000801515.1	yes	NC_000001.11	99.133	807	0	1450	bacteria
NZ_APIJ01000047.1:490-692	LINE	NZ_APIJ01000047.1	L1HS_5end	194	692	692	490	4.4e-21	78.7	21.5	Listeria monocytogenes SHL010 contig58, whole genome shotgun sequence	WP_039390242.1	L_monocytogenes_SHL010_v1.0	Listeria monocytogenes SHL010 (firmicutes)	strain=SHL010	1302630	SAMN03265955	PRJNA192207	University of Maryland, College Park	2014-12-15	n/a	major	Contig	full	Newbler v. 2.6	77.0x	Illumina MiSeq		GCA_000801515.1	GCF_000801515.1	yes	NC_000011.10	96	200	4.93e-86	322	bacteria
NZ_APIJ01000047.1:76-296	LINE	NZ_APIJ01000047.1	L1HS_5end	186	692	296	76	1.5e-28	103.5	5.1	Listeria monocytogenes SHL010 contig58, whole genome shotgun sequence	WP_039390242.1	L_monocytogenes_SHL010_v1.0	Listeria monocytogenes SHL010 (firmicutes)	strain=SHL010	1302630	SAMN03265955	PRJNA192207	University of Maryland, College Park	2014-12-15	n/a	major	Contig	full	Newbler v. 2.6	77.0x	Illumina MiSeq		GCA_000801515.1	GCF_000801515.1	yes	NC_000009.12	96.296	216	6.93e-95	351	bacteria
NZ_APIJ01000050.1:1-575	LINE	NZ_APIJ01000050.1	L1P1_orf2	573	575	1	575	2.1e-217	729	37.7	Listeria monocytogenes SHL010 contig72, whole genome shotgun sequence		L_monocytogenes_SHL010_v1.0	Listeria monocytogenes SHL010 (firmicutes)	strain=SHL010	1302630	SAMN03265955	PRJNA192207	University of Maryland, College Park	2014-12-15	n/a	major	Contig	full	Newbler v. 2.6	77.0x	Illumina MiSeq		GCA_000801515.1	GCF_000801515.1	yes	NC_000005.10	99.652	575	0	1051	bacteria
NZ_APME01000126.1:1-120	Sat	NZ_APME01000126.1	ALR	117	328	120	1	6.1e-28	105.5	5	Pseudoalteromonas agarivorans S816 S816_contig_129, whole genome shotgun sequence		S816-1_1.0	Pseudoalteromonas agarivorans S816 (g-proteobacteria)	strain=S816	1307437	SAMN02471034	PRJNA193579	Department of Systems Biology, Technical University of Denmark	2013-4-11	n/a	major	Contig	full	CLC Genomic Workbench v. 6.0.1	130.0x	Illumina HiSeq		GCA_000363985.1	GCF_000363985.1	yes	NC_000018.10	100	118	3.5e-55	219	bacteria
NZ_APME01000126.1:121-287	Sat	NZ_APME01000126.1	ALR	170	328	287	121	6.6e-41	147.7	10.1	Pseudoalteromonas agarivorans S816 S816_contig_129, whole genome shotgun sequence		S816-1_1.0	Pseudoalteromonas agarivorans S816 (g-proteobacteria)	strain=S816	1307437	SAMN02471034	PRJNA193579	Department of Systems Biology, Technical University of Denmark	2013-4-11	n/a	major	Contig	full	CLC Genomic Workbench v. 6.0.1	130.0x	Illumina HiSeq		GCA_000363985.1	GCF_000363985.1	yes	NC_000018.10	93.333	165	3.13e-62	243	bacteria
NZ_APME01000129.1:415-1186	LINE	NZ_APME01000129.1	L1HS_3end	768	1186	415	1186	4e-288	964.3	43.7	Pseudoalteromonas agarivorans S816 S816_contig_132, whole genome shotgun sequence	WP_039972597.1	S816-1_1.0	Pseudoalteromonas agarivorans S816 (g-proteobacteria)	strain=S816	1307437	SAMN02471034	PRJNA193579	Department of Systems Biology, Technical University of Denmark	2013-4-11	n/a	major	Contig	full	CLC Genomic Workbench v. 6.0.1	130.0x	Illumina HiSeq		GCA_000363985.1	GCF_000363985.1	yes	NC_000006.12	98.571	770	0	1360	bacteria
NZ_APME01000130.1:7-1182	LINE	NZ_APME01000130.1	L1P1_orf2	1156	1241	1182	7	0	1442.6	88.3	Pseudoalteromonas agarivorans S816 S816_contig_134, whole genome shotgun sequence		S816-1_1.0	Pseudoalteromonas agarivorans S816 (g-proteobacteria)	strain=S816	1307437	SAMN02471034	PRJNA193579	Department of Systems Biology, Technical University of Denmark	2013-4-11	n/a	major	Contig	full	CLC Genomic Workbench v. 6.0.1	130.0x	Illumina HiSeq		GCA_000363985.1	GCF_000363985.1	yes	NC_000005.10	97.818	1146	0	1978	bacteria
NZ_APME01000131.1:57-201	HSATII	NZ_APME01000131.1	HSATII	145	201	201	57	1.6e-34	126.3	10.9	Pseudoalteromonas agarivorans S816 S816_contig_138, whole genome shotgun sequence		S816-1_1.0	Pseudoalteromonas agarivorans S816 (g-proteobacteria)	strain=S816	1307437	SAMN02471034	PRJNA193579	Department of Systems Biology, Technical University of Denmark	2013-4-11	n/a	major	Contig	full	CLC Genomic Workbench v. 6.0.1	130.0x	Illumina HiSeq		GCA_000363985.1	GCF_000363985.1	yes	NC_000001.11	100	145	4.35e-70	268	bacteria
NZ_APME01000132.1:73-285	LINE	NZ_APME01000132.1	L1HS_3end	209	285	285	73	2.6e-54	190.5	11.2	Pseudoalteromonas agarivorans S816 S816_contig_139, whole genome shotgun sequence		S816-1_1.0	Pseudoalteromonas agarivorans S816 (g-proteobacteria)	strain=S816	1307437	SAMN02471034	PRJNA193579	Department of Systems Biology, Technical University of Denmark	2013-4-11	n/a	major	Contig	full	CLC Genomic Workbench v. 6.0.1	130.0x	Illumina HiSeq		GCA_000363985.1	GCF_000363985.1	yes	NC_000002.12	97.608	209	3.97e-97	359	bacteria
NZ_APME01000133.1:9-301	LINE	NZ_APME01000133.1	L1HS_5end	283	304	9	301	1.3e-97	332.6	19.6	Pseudoalteromonas agarivorans S816 S816_contig_140, whole genome shotgun sequence		S816-1_1.0	Pseudoalteromonas agarivorans S816 (g-proteobacteria)	strain=S816	1307437	SAMN02471034	PRJNA193579	Department of Systems Biology, Technical University of Denmark	2013-4-11	n/a	major	Contig	full	CLC Genomic Workbench v. 6.0.1	130.0x	Illumina HiSeq		GCA_000363985.1	GCF_000363985.1	yes	NC_000008.11	98.239	284	1.15e-138	497	bacteria
NZ_APMO01000006.1:107-303	Alu	NZ_APMO01000006.1	AluJo	199	303	107	303	2e-50	178.2	3.8	Rickettsia prowazekii str. Cairo 3 contig00657, whole genome shotgun sequence		P_2008_03_27_11_29_25_runAssembly	Rickettsia prowazekii str. Cairo 3 (a-proteobacteria)	strain=Cairo 3	1290430	SAMN01983878	PRJNA188532	Naval Medical Research Center	2013-4-29	n/a	major	Contig	full	Newbler v. Mar-2008	100.0x	Roche 454		GCA_000385495.1	GCF_000385495.1	yes	NC_000017.11	90.11	182	4.93e-61	239	bacteria
NZ_APMO01000016.1:1-370	LINE	NZ_APMO01000016.1	L1HS_3end	358	371	1	370	6.4e-49	172.6	13.7	Rickettsia prowazekii str. Cairo 3 contig00247, whole genome shotgun sequence		P_2008_03_27_11_29_25_runAssembly	Rickettsia prowazekii str. Cairo 3 (a-proteobacteria)	strain=Cairo 3	1290430	SAMN01983878	PRJNA188532	Naval Medical Research Center	2013-4-29	n/a	major	Contig	full	Newbler v. Mar-2008	100.0x	Roche 454		GCA_000385495.1	GCF_000385495.1	yes	NC_000005.10	87.805	369	1.53e-118	431	bacteria
NZ_APMO01000017.1:1-427	LTR	NZ_APMO01000017.1	THE1-int	434	427	1	427	7.2e-130	439.2	13.5	Rickettsia prowazekii str. Cairo 3 contig00568, whole genome shotgun sequence	WP_037215645.1	P_2008_03_27_11_29_25_runAssembly	Rickettsia prowazekii str. Cairo 3 (a-proteobacteria)	strain=Cairo 3	1290430	SAMN01983878	PRJNA188532	Naval Medical Research Center	2013-4-29	n/a	major	Contig	full	Newbler v. Mar-2008	100.0x	Roche 454		GCA_000385495.1	GCF_000385495.1	yes	NC_000007.14	87.156	436	2.24e-137	494	bacteria
NZ_APVW01000047.1:1-154	HSATII	NZ_APVW01000047.1	HSATII	157	808	1	154	1.8e-32	119.4	14.1	Klebsiella pneumoniae VAKPC252 contig00166, whole genome shotgun sequence	WP_071600889.1	gkp38v01	Klebsiella pneumoniae VAKPC252 (enterobacteria)	strain=VAKPC252	1284824	SAMN02142041	PRJNA187316	JCVI	2013-6-4	n/a	major	Contig	full	Newbler v. 2.3	117x	Illumina PE 2x100		GCA_000406725.1	GCF_000406725.1	yes	NC_000001.11	100	154	4.65e-75	285	bacteria
NZ_APVW01000047.1:185-353	HSATII	NZ_APVW01000047.1	HSATII	168	808	185	353	5.4e-43	153.7	13.5	Klebsiella pneumoniae VAKPC252 contig00166, whole genome shotgun sequence	WP_071600889.1	gkp38v01	Klebsiella pneumoniae VAKPC252 (enterobacteria)	strain=VAKPC252	1284824	SAMN02142041	PRJNA187316	JCVI	2013-6-4	n/a	major	Contig	full	Newbler v. 2.3	117x	Illumina PE 2x100		GCA_000406725.1	GCF_000406725.1	yes	NC_000001.11	98.817	169	5.17e-80	302	bacteria
NZ_APVW01000047.1:505-655	HSATII	NZ_APVW01000047.1	HSATII	153	808	505	655	2.3e-36	132.1	13.3	Klebsiella pneumoniae VAKPC252 contig00166, whole genome shotgun sequence	WP_071600889.1	gkp38v01	Klebsiella pneumoniae VAKPC252 (enterobacteria)	strain=VAKPC252	1284824	SAMN02142041	PRJNA187316	JCVI	2013-6-4	n/a	major	Contig	full	Newbler v. 2.3	117x	Illumina PE 2x100		GCA_000406725.1	GCF_000406725.1	yes	NC_000001.11	100	151	2.11e-73	279	bacteria
NZ_APVW01000047.1:656-808	HSATII	NZ_APVW01000047.1	HSATII	149	808	656	808	2e-33	122.5	14.4	Klebsiella pneumoniae VAKPC252 contig00166, whole genome shotgun sequence	WP_071600889.1	gkp38v01	Klebsiella pneumoniae VAKPC252 (enterobacteria)	strain=VAKPC252	1284824	SAMN02142041	PRJNA187316	JCVI	2013-6-4	n/a	major	Contig	full	Newbler v. 2.3	117x	Illumina PE 2x100		GCA_000406725.1	GCF_000406725.1	yes	NC_000001.11	100	153	1.66e-74	283	bacteria
NZ_AQGJ01000014.1:28-306	Alu	NZ_AQGJ01000014.1	AluSz	273	306	306	28	5e-76	259.8	5.7	Paeniclostridium sordellii VPI 9048 cs9048.contig.13, whole genome shotgun sequence		ASM44409v1	Paeniclostridium sordellii VPI 9048 (firmicutes)	strain=VPI 9048	1292035	SAMN02470118	PRJNA188694	Kansas State University	2013-8-5	n/a	major	Contig	full	Newbler Metrics v. 2.3	50x	Illumina; 454 GS FLX		GCA_000444095.1	GCF_000444095.1	yes	NC_000005.10	93.534	232	5.4e-92	342	bacteria
NZ_ARXV01000034.1:396-1033	LINE	NZ_ARXV01000034.1	L1HS_3end	636	1033	396	1033	1.5e-232	780.6	44.3	Alcanivorax nanhaiticus strain 19-m-6 contig34, whole genome shotgun sequence		ASM75666v1	Alcanivorax nanhaiticus (g-proteobacteria)	strain=19-m-6	1177154	SAMN03076215	PRJNA161035	The Third Institute of State Oceanic Administration (SOA)	2014-9-23	n/a	major	Contig	full	SOAPdenovo v. 1.05	135.0	Illumina GAIIx	Representative Genome	GCA_000756665.1	GCF_000756665.1	yes	NC_000023.11	98.433	638	0	1123	bacteria
NZ_ASRI01000113.1:1-302	Alu	NZ_ASRI01000113.1	AluSx	297	1635	302	1	3.2e-98	335.4	7.6	Escherichia coli NCTC 50110 50110.147, whole genome shotgun sequence		CREcoli50110	Escherichia coli NCTC 50110 (E. coli)	strain=NCTC 50110	1333537	SAMN02837053	PRJNA202858	University of Leeds	2014-10-15	n/a	major	Contig	full	CLC Genomics Workbench v. 6.0.2	500.0x	Illumina MiSeq		GCA_000766965.1	GCF_000766965.1	yes	NC_000003.12	97.351	302	1.18e-143	514	bacteria
NZ_ASRI01000113.1:461-565	Alu	NZ_ASRI01000113.1	AluSx	89	1635	565	461	2.7e-19	76	2.7	Escherichia coli NCTC 50110 50110.147, whole genome shotgun sequence		CREcoli50110	Escherichia coli NCTC 50110 (E. coli)	strain=NCTC 50110	1333537	SAMN02837053	PRJNA202858	University of Leeds	2014-10-15	n/a	major	Contig	full	CLC Genomics Workbench v. 6.0.2	500.0x	Illumina MiSeq		GCA_000766965.1	GCF_000766965.1	yes	NC_000003.12	100	105	4.99e-48	195	bacteria
NZ_ASRI01000113.1:965-1233	Alu	NZ_ASRI01000113.1	AluJo	299	1635	1233	965	7.9e-60	209	5.4	Escherichia coli NCTC 50110 50110.147, whole genome shotgun sequence		CREcoli50110	Escherichia coli NCTC 50110 (E. coli)	strain=NCTC 50110	1333537	SAMN02837053	PRJNA202858	University of Leeds	2014-10-15	n/a	major	Contig	full	CLC Genomics Workbench v. 6.0.2	500.0x	Illumina MiSeq		GCA_000766965.1	GCF_000766965.1	yes	NC_000003.12	89.437	284	1.44e-92	344	bacteria
NZ_ATCK01000019.1:1029-1199	Sat	NZ_ATCK01000019.1	ALR	170	1372	1199	1029	1.5e-44	159.6	5.7	Enterobacter cloacae str. Hanford ctg27, whole genome shotgun sequence		E_cloacae_Hanford_v1.0	Enterobacter ludwigii (enterobacteria)	strain=Hanford	299767	SAMN02212350	PRJNA206261	Oak Ridge National Lab	2013-7-11	n/a	major	Contig	full	CLC Genomics Workbench v. 6.0	25x	Illumina MiSeq		GCA_000422225.1	GCF_000422225.1	yes	NC_000013.11	100	171	1.87e-84	316	bacteria
NZ_ATCK01000019.1:11-181	Sat	NZ_ATCK01000019.1	ALR	170	1372	181	11	4.7e-43	154.7	6.8	Enterobacter cloacae str. Hanford ctg27, whole genome shotgun sequence		E_cloacae_Hanford_v1.0	Enterobacter ludwigii (enterobacteria)	strain=Hanford	299767	SAMN02212350	PRJNA206261	Oak Ridge National Lab	2013-7-11	n/a	major	Contig	full	CLC Genomics Workbench v. 6.0	25x	Illumina MiSeq		GCA_000422225.1	GCF_000422225.1	yes	NC_000018.10	98.83	171	4.05e-81	305	bacteria
NZ_ATCK01000019.1:1200-1366	Sat	NZ_ATCK01000019.1	ALR	170	1372	1366	1200	3.5e-33	122.5	9.4	Enterobacter cloacae str. Hanford ctg27, whole genome shotgun sequence		E_cloacae_Hanford_v1.0	Enterobacter ludwigii (enterobacteria)	strain=Hanford	299767	SAMN02212350	PRJNA206261	Oak Ridge National Lab	2013-7-11	n/a	major	Contig	full	CLC Genomics Workbench v. 6.0	25x	Illumina MiSeq		GCA_000422225.1	GCF_000422225.1	yes	NC_000013.11	92.814	167	3.13e-62	243	bacteria
NZ_ATCK01000019.1:182-348	Sat	NZ_ATCK01000019.1	ALR	170	1372	348	182	2.3e-35	129.6	9	Enterobacter cloacae str. Hanford ctg27, whole genome shotgun sequence		E_cloacae_Hanford_v1.0	Enterobacter ludwigii (enterobacteria)	strain=Hanford	299767	SAMN02212350	PRJNA206261	Oak Ridge National Lab	2013-7-11	n/a	major	Contig	full	CLC Genomics Workbench v. 6.0	25x	Illumina MiSeq		GCA_000422225.1	GCF_000422225.1	yes	NC_000018.10	100	167	3.05e-82	309	bacteria
NZ_ATCK01000019.1:349-519	Sat	NZ_ATCK01000019.1	ALR	170	1372	519	349	3.9e-47	168	5.3	Enterobacter cloacae str. Hanford ctg27, whole genome shotgun sequence		E_cloacae_Hanford_v1.0	Enterobacter ludwigii (enterobacteria)	strain=Hanford	299767	SAMN02212350	PRJNA206261	Oak Ridge National Lab	2013-7-11	n/a	major	Contig	full	CLC Genomics Workbench v. 6.0	25x	Illumina MiSeq		GCA_000422225.1	GCF_000422225.1	yes	NC_000018.10	100	171	1.87e-84	316	bacteria
NZ_ATCK01000019.1:520-690	Sat	NZ_ATCK01000019.1	ALR	170	1372	690	520	2.8e-36	132.6	6.9	Enterobacter cloacae str. Hanford ctg27, whole genome shotgun sequence		E_cloacae_Hanford_v1.0	Enterobacter ludwigii (enterobacteria)	strain=Hanford	299767	SAMN02212350	PRJNA206261	Oak Ridge National Lab	2013-7-11	n/a	major	Contig	full	CLC Genomics Workbench v. 6.0	25x	Illumina MiSeq		GCA_000422225.1	GCF_000422225.1	yes	NC_000018.10	100	171	1.87e-84	316	bacteria
NZ_ATCK01000019.1:691-861	Sat	NZ_ATCK01000019.1	ALR	170	1372	861	691	2.6e-49	175	5.7	Enterobacter cloacae str. Hanford ctg27, whole genome shotgun sequence		E_cloacae_Hanford_v1.0	Enterobacter ludwigii (enterobacteria)	strain=Hanford	299767	SAMN02212350	PRJNA206261	Oak Ridge National Lab	2013-7-11	n/a	major	Contig	full	CLC Genomics Workbench v. 6.0	25x	Illumina MiSeq		GCA_000422225.1	GCF_000422225.1	yes	NC_000018.10	96.491	171	1.9e-74	283	bacteria
NZ_ATCK01000019.1:862-1027	Sat	NZ_ATCK01000019.1	ALR	169	1372	1027	862	3.5e-31	116	12.6	Enterobacter cloacae str. Hanford ctg27, whole genome shotgun sequence		E_cloacae_Hanford_v1.0	Enterobacter ludwigii (enterobacteria)	strain=Hanford	299767	SAMN02212350	PRJNA206261	Oak Ridge National Lab	2013-7-11	n/a	major	Contig	full	CLC Genomics Workbench v. 6.0	25x	Illumina MiSeq		GCA_000422225.1	GCF_000422225.1	yes	NC_000009.12	92.771	166	1.12e-61	241	bacteria
NZ_ATCK01000020.1:1-699	LINE	NZ_ATCK01000020.1	L1P1_orf2	691	852	1	699	2.4e-218	732.2	75.1	Enterobacter cloacae str. Hanford ctg28, whole genome shotgun sequence		E_cloacae_Hanford_v1.0	Enterobacter ludwigii (enterobacteria)	strain=Hanford	299767	SAMN02212350	PRJNA206261	Oak Ridge National Lab	2013-7-11	n/a	major	Contig	full	CLC Genomics Workbench v. 6.0	25x	Illumina MiSeq		GCA_000422225.1	GCF_000422225.1	yes	NC_000006.12	93.078	679	0	994	bacteria
NZ_ATCK01000023.1:1-89	Alu	NZ_ATCK01000023.1	AluY	77	812	1	89	3.6e-15	62.8	6.7	Enterobacter cloacae str. Hanford ctg30, whole genome shotgun sequence		E_cloacae_Hanford_v1.0	Enterobacter ludwigii (enterobacteria)	strain=Hanford	299767	SAMN02212350	PRJNA206261	Oak Ridge National Lab	2013-7-11	n/a	major	Contig	full	CLC Genomics Workbench v. 6.0	25x	Illumina MiSeq		GCA_000422225.1	GCF_000422225.1	yes	NC_000001.11	100	89	3.11e-39	165	bacteria
NZ_ATCK01000027.1:1-535	LINE	NZ_ATCK01000027.1	L1P1_orf2	533	535	535	1	1.9e-162	546.7	62.3	Enterobacter cloacae str. Hanford ctg35, whole genome shotgun sequence		E_cloacae_Hanford_v1.0	Enterobacter ludwigii (enterobacteria)	strain=Hanford	299767	SAMN02212350	PRJNA206261	Oak Ridge National Lab	2013-7-11	n/a	major	Contig	full	CLC Genomics Workbench v. 6.0	25x	Illumina MiSeq		GCA_000422225.1	GCF_000422225.1	yes	NC_000001.11	94.03	536	0	811	bacteria
NZ_ATCK01000029.1:1-132	Alu	NZ_ATCK01000029.1	AluY	122	669	1	132	2.3e-29	109.5	15.3	Enterobacter cloacae str. Hanford ctg37, whole genome shotgun sequence		E_cloacae_Hanford_v1.0	Enterobacter ludwigii (enterobacteria)	strain=Hanford	299767	SAMN02212350	PRJNA206261	Oak Ridge National Lab	2013-7-11	n/a	major	Contig	full	CLC Genomics Workbench v. 6.0	25x	Illumina MiSeq		GCA_000422225.1	GCF_000422225.1	yes	NC_000005.10	97.015	134	8.49e-57	224	bacteria
NZ_ATCK01000029.1:552-669	Alu	NZ_ATCK01000029.1	AluSz	117	669	552	669	5.2e-31	114.6	3.4	Enterobacter cloacae str. Hanford ctg37, whole genome shotgun sequence		E_cloacae_Hanford_v1.0	Enterobacter ludwigii (enterobacteria)	strain=Hanford	299767	SAMN02212350	PRJNA206261	Oak Ridge National Lab	2013-7-11	n/a	major	Contig	full	CLC Genomics Workbench v. 6.0	25x	Illumina MiSeq		GCA_000422225.1	GCF_000422225.1	yes	NC_000001.11	93.86	114	2.7e-41	172	bacteria
NZ_ATHJ01000044.1:1-122	Sat	NZ_ATHJ01000044.1	ALR	122	290	122	1	6.1e-27	102.3	9.9	Desulfococcus multivorans DSM 2059 ctg140, whole genome shotgun sequence		D_multivorans_DSM2059_v1.0	Desulfococcus multivorans DSM 2059 (d-proteobacteria)	strain=DSM 2059	1121405	SAMN02207450	PRJNA208569	Oak Ridge National Lab	2013-7-11	n/a	major	Contig	full	CLC Genomics workbench v. 6.0	205x	Illumina MiSeq		GCA_000422185.1	GCF_000422185.1	yes	NC_000009.12	99.18	122	9.93e-56	220	bacteria
NZ_ATHJ01000044.1:123-289	Sat	NZ_ATHJ01000044.1	ALR	170	290	289	123	4.9e-40	145	9.3	Desulfococcus multivorans DSM 2059 ctg140, whole genome shotgun sequence		D_multivorans_DSM2059_v1.0	Desulfococcus multivorans DSM 2059 (d-proteobacteria)	strain=DSM 2059	1121405	SAMN02207450	PRJNA208569	Oak Ridge National Lab	2013-7-11	n/a	major	Contig	full	CLC Genomics workbench v. 6.0	205x	Illumina MiSeq		GCA_000422185.1	GCF_000422185.1	yes	NC_000011.10	98.795	166	2.37e-78	296	bacteria
NZ_ATHJ01000045.1:341-554	HSATII	NZ_ATHJ01000045.1	HSATII	157	554	554	341	2.8e-12	53.9	32.1	Desulfococcus multivorans DSM 2059 ctg145, whole genome shotgun sequence	WP_040414256.1	D_multivorans_DSM2059_v1.0	Desulfococcus multivorans DSM 2059 (d-proteobacteria)	strain=DSM 2059	1121405	SAMN02207450	PRJNA208569	Oak Ridge National Lab	2013-7-11	n/a	major	Contig	full	CLC Genomics workbench v. 6.0	205x	Illumina MiSeq		GCA_000422185.1	GCF_000422185.1	yes	NC_000024.10	99.065	214	6.59e-105	385	bacteria
NZ_ATHV01000062.1:1-450	LINE	NZ_ATHV01000062.1	L1HS_5end	445	545	450	1	1.5e-138	468.6	10.2	Desulfovibrio sp. X2 ctg69, whole genome shotgun sequence		Desulfococcus_X2_v1.0	Desulfovibrio sp. X2 (d-proteobacteria)	strain=X2	941449	SAMN02207452	PRJNA208571	Oak Ridge National Lab	2013-7-11	n/a	major	Contig	full	CLC Genomics workbench v. 6.0	337x	Illumina MiSeq		GCA_000422205.1	GCF_000422205.1	yes	NC_000003.12	95.1	449	0	704	bacteria
NZ_ATPG01000103.1:129-850	LINE	NZ_ATPG01000103.1	L1HS_5end	687	1489	129	850	2.4e-255	855.3	55.6	Neisseria gonorrhoeae SK6987 contig191, whole genome shotgun sequence	WP_082298426.1;WP_003694574.1	ASM102616v1	Neisseria gonorrhoeae SK6987 (b-proteobacteria)	strain=SK6987	1352529	SAMN02338784	PRJNA209319	Read Laboratory, Emory University	2015-6-10	n/a	major	Contig	full	Velvet v. May-2013	627.0x	Illumina HiSeq		GCA_001026165.1	GCF_001026165.1	yes	NC_000008.11	100	685	0	1266	bacteria
NZ_ATPI01000266.1:248-969	LINE	NZ_ATPI01000266.1	L1HS_5end	687	1604	248	969	2.4e-255	855.3	55.6	Neisseria gonorrhoeae SK7842 contig338, whole genome shotgun sequence	WP_082298426.1;WP_003694574.1	ASM102576v1	Neisseria gonorrhoeae SK7842 (b-proteobacteria)	strain=SK7842	1352527	SAMN02338786	PRJNA209333	Read Laboratory, Emory University	2015-6-10	n/a	major	Contig	full	Velvet v. May-2013	232.0x	Illumina HiSeq		GCA_001025765.1	GCF_001025765.1	yes	NC_000008.11	100	685	0	1266	bacteria
NZ_ATPV01000081.1:639-1360	LINE	NZ_ATPV01000081.1	L1HS_5end	687	1464	1360	639	3.2e-255	855.3	55.6	Neisseria gonorrhoeae SK29344 contig171, whole genome shotgun sequence	WP_003694574.1;WP_082298426.1	ASM102617v1	Neisseria gonorrhoeae SK29344 (b-proteobacteria)	strain=SK29344	1352514	SAMN02338798	PRJNA209375	Read Laboratory, Emory University	2015-6-10	n/a	major	Contig	full	Velvet v. May-2013	246.0x	Illumina HiSeq		GCA_001026175.1	GCF_001026175.1	yes	NC_000008.11	100	685	0	1266	bacteria
NZ_ATQD01000082.1:608-1329	LINE	NZ_ATQD01000082.1	L1HS_5end	687	1407	1329	608	2.4e-255	855.3	55.6	Neisseria gonorrhoeae ATL_2011_01_03 contig172, whole genome shotgun sequence	WP_003694574.1;WP_082298426.1	ATL_2011_01_03	Neisseria gonorrhoeae ATL_2011_01_03 (b-proteobacteria)	strain=ATL_2011_01_03	1351780	SAMN02338806	PRJNA209479	Read Laboratory, Emory University	2015-6-10	n/a	major	Contig	full	Velvet v. May-2013	122.0x	Illumina HiSeq		GCA_001025585.1	GCF_001025585.1	yes	NC_000008.11	100	685	0	1266	bacteria
NZ_ATQX01000228.1:26-746	LINE	NZ_ATQX01000228.1	L1HS_5end	687	1351	26	746	2.8e-255	855.1	55.8	Neisseria gonorrhoeae MU_NG4 contig303, whole genome shotgun sequence	WP_082298426.1;WP_003694574.1	ASM102570v1	Neisseria gonorrhoeae MU_NG4 (b-proteobacteria)	strain=MU_NG4	1351799	SAMN02338825	PRJNA209616	Read Laboratory, Emory University	2015-6-10	n/a	major	Scaffold	full	Velvet v. May-2013	81.0x	Illumina HiSeq		GCA_001025705.1	GCF_001025705.1	yes	NC_000008.11	100	685	0	1266	bacteria
NZ_AUNH01000008.1:219-389	Sat	NZ_AUNH01000008.1	ALR	170	654	389	219	2.3e-40	145.9	3.1	Mycobacterium tuberculosis Mtb194 contig_10, whole genome shotgun sequence		Mtb194v1	Mycobacterium tuberculosis Mtb194 (high GC Gram+)	strain=Mtb194	1354276	SAMN02864882	PRJNA210727	Institute of Microbiology Chinese Academy of Sciences	2014-6-17	n/a	major	Scaffold	full	SOAPdenovo v. 1.05	437.0x	Illumina GAIIx		GCA_000709575.1	GCF_000709575.1	yes	NC_000013.11	100	171	1.87e-84	316	bacteria
NZ_AUNH01000008.1:390-560	Sat	NZ_AUNH01000008.1	ALR	170	654	560	390	2.5e-43	155.6	6.8	Mycobacterium tuberculosis Mtb194 contig_10, whole genome shotgun sequence		Mtb194v1	Mycobacterium tuberculosis Mtb194 (high GC Gram+)	strain=Mtb194	1354276	SAMN02864882	PRJNA210727	Institute of Microbiology Chinese Academy of Sciences	2014-6-17	n/a	major	Scaffold	full	SOAPdenovo v. 1.05	437.0x	Illumina GAIIx		GCA_000709575.1	GCF_000709575.1	yes	NC_000013.11	100	171	1.87e-84	316	bacteria
NZ_AUNH01000008.1:48-218	Sat	NZ_AUNH01000008.1	ALR	170	654	218	48	7.6e-45	160.5	11.7	Mycobacterium tuberculosis Mtb194 contig_10, whole genome shotgun sequence		Mtb194v1	Mycobacterium tuberculosis Mtb194 (high GC Gram+)	strain=Mtb194	1354276	SAMN02864882	PRJNA210727	Institute of Microbiology Chinese Academy of Sciences	2014-6-17	n/a	major	Scaffold	full	SOAPdenovo v. 1.05	437.0x	Illumina GAIIx		GCA_000709575.1	GCF_000709575.1	yes	NC_000013.11	98.246	171	1.89e-79	300	bacteria
NZ_AUNH01000008.1:561-654	Sat	NZ_AUNH01000008.1	ALR	91	654	654	561	6.4e-21	82.6	1.5	Mycobacterium tuberculosis Mtb194 contig_10, whole genome shotgun sequence		Mtb194v1	Mycobacterium tuberculosis Mtb194 (high GC Gram+)	strain=Mtb194	1354276	SAMN02864882	PRJNA210727	Institute of Microbiology Chinese Academy of Sciences	2014-6-17	n/a	major	Scaffold	full	SOAPdenovo v. 1.05	437.0x	Illumina GAIIx		GCA_000709575.1	GCF_000709575.1	yes	NC_000013.11	100	94	5.59e-42	174	bacteria
NZ_AUNH01000022.1:1056-1196	HSATII	NZ_AUNH01000022.1	HSATII	138	1277	1056	1196	5.3e-32	118	11.8	Mycobacterium tuberculosis Mtb194 contig_27, whole genome shotgun sequence		Mtb194v1	Mycobacterium tuberculosis Mtb194 (high GC Gram+)	strain=Mtb194	1354276	SAMN02864882	PRJNA210727	Institute of Microbiology Chinese Academy of Sciences	2014-6-17	n/a	major	Scaffold	full	SOAPdenovo v. 1.05	437.0x	Illumina GAIIx		GCA_000709575.1	GCF_000709575.1	yes	NC_000016.10	99.291	141	3.27e-66	255	bacteria
NZ_AUNH01000022.1:380-551	HSATII	NZ_AUNH01000022.1	HSATII	168	1277	380	551	5.2e-42	150.6	15.6	Mycobacterium tuberculosis Mtb194 contig_27, whole genome shotgun sequence		Mtb194v1	Mycobacterium tuberculosis Mtb194 (high GC Gram+)	strain=Mtb194	1354276	SAMN02864882	PRJNA210727	Institute of Microbiology Chinese Academy of Sciences	2014-6-17	n/a	major	Scaffold	full	SOAPdenovo v. 1.05	437.0x	Illumina GAIIx		GCA_000709575.1	GCF_000709575.1	yes	NC_000001.11	100	172	5.24e-85	318	bacteria
NZ_AUNH01000022.1:634-786	HSATII	NZ_AUNH01000022.1	HSATII	144	1277	634	786	5.5e-33	121.2	19.5	Mycobacterium tuberculosis Mtb194 contig_27, whole genome shotgun sequence		Mtb194v1	Mycobacterium tuberculosis Mtb194 (high GC Gram+)	strain=Mtb194	1354276	SAMN02864882	PRJNA210727	Institute of Microbiology Chinese Academy of Sciences	2014-6-17	n/a	major	Scaffold	full	SOAPdenovo v. 1.05	437.0x	Illumina GAIIx		GCA_000709575.1	GCF_000709575.1	yes	NC_000016.10	98.693	153	3.59e-71	272	bacteria
NZ_AUNH01000022.1:788-955	HSATII	NZ_AUNH01000022.1	HSATII	168	1277	788	955	2.7e-39	141.7	12.4	Mycobacterium tuberculosis Mtb194 contig_27, whole genome shotgun sequence		Mtb194v1	Mycobacterium tuberculosis Mtb194 (high GC Gram+)	strain=Mtb194	1354276	SAMN02864882	PRJNA210727	Institute of Microbiology Chinese Academy of Sciences	2014-6-17	n/a	major	Scaffold	full	SOAPdenovo v. 1.05	437.0x	Illumina GAIIx		GCA_000709575.1	GCF_000709575.1	yes	NC_000016.10	98.81	168	1.85e-79	300	bacteria
NZ_AUNH01000022.1:90-254	HSATII	NZ_AUNH01000022.1	HSATII	160	1277	90	254	1.4e-45	162.2	14.2	Mycobacterium tuberculosis Mtb194 contig_27, whole genome shotgun sequence		Mtb194v1	Mycobacterium tuberculosis Mtb194 (high GC Gram+)	strain=Mtb194	1354276	SAMN02864882	PRJNA210727	Institute of Microbiology Chinese Academy of Sciences	2014-6-17	n/a	major	Scaffold	full	SOAPdenovo v. 1.05	437.0x	Illumina GAIIx		GCA_000709575.1	GCF_000709575.1	yes	NC_000016.10	96.273	161	6.59e-69	265	bacteria
NZ_AUNH01000024.1:1-128	Sat	NZ_AUNH01000024.1	ALR	125	217	128	1	5e-29	109	5.7	Mycobacterium tuberculosis Mtb194 contig_30, whole genome shotgun sequence		Mtb194v1	Mycobacterium tuberculosis Mtb194 (high GC Gram+)	strain=Mtb194	1354276	SAMN02864882	PRJNA210727	Institute of Microbiology Chinese Academy of Sciences	2014-6-17	n/a	major	Scaffold	full	SOAPdenovo v. 1.05	437.0x	Illumina GAIIx		GCA_000709575.1	GCF_000709575.1	yes	NC_000017.11	100	128	1.05e-60	237	bacteria
NZ_AUNH01000053.1:1-134	Sat	NZ_AUNH01000053.1	ALR	132	134	134	1	7.5e-31	114.9	5.3	Mycobacterium tuberculosis Mtb194 contig_72, whole genome shotgun sequence		Mtb194v1	Mycobacterium tuberculosis Mtb194 (high GC Gram+)	strain=Mtb194	1354276	SAMN02864882	PRJNA210727	Institute of Microbiology Chinese Academy of Sciences	2014-6-17	n/a	major	Scaffold	full	SOAPdenovo v. 1.05	437.0x	Illumina GAIIx		GCA_000709575.1	GCF_000709575.1	yes	NC_000003.12	100	134	5.14e-64	248	bacteria
NZ_AUNH01000085.1:1-139	HSATII	NZ_AUNH01000085.1	HSATII	135	2210	139	1	3.1e-31	115.5	15.9	Mycobacterium tuberculosis Mtb194 contig_105, whole genome shotgun sequence	WP_078447263.1	Mtb194v1	Mycobacterium tuberculosis Mtb194 (high GC Gram+)	strain=Mtb194	1354276	SAMN02864882	PRJNA210727	Institute of Microbiology Chinese Academy of Sciences	2014-6-17	n/a	major	Scaffold	full	SOAPdenovo v. 1.05	437.0x	Illumina GAIIx		GCA_000709575.1	GCF_000709575.1	yes	NC_000001.11	100	139	8.94e-67	257	bacteria
NZ_AUNH01000085.1:1241-1416	HSATII	NZ_AUNH01000085.1	HSATII	164	2210	1416	1241	2.4e-19	76.8	48	Mycobacterium tuberculosis Mtb194 contig_105, whole genome shotgun sequence	WP_078447263.1	Mtb194v1	Mycobacterium tuberculosis Mtb194 (high GC Gram+)	strain=Mtb194	1354276	SAMN02864882	PRJNA210727	Institute of Microbiology Chinese Academy of Sciences	2014-6-17	n/a	major	Scaffold	full	SOAPdenovo v. 1.05	437.0x	Illumina GAIIx		GCA_000709575.1	GCF_000709575.1	yes	NC_000001.11	80.473	169	2.71e-28	130	bacteria
NZ_AUNH01000085.1:140-306	HSATII	NZ_AUNH01000085.1	HSATII	167	2210	306	140	2.3e-40	145.2	14.3	Mycobacterium tuberculosis Mtb194 contig_105, whole genome shotgun sequence	WP_078447263.1	Mtb194v1	Mycobacterium tuberculosis Mtb194 (high GC Gram+)	strain=Mtb194	1354276	SAMN02864882	PRJNA210727	Institute of Microbiology Chinese Academy of Sciences	2014-6-17	n/a	major	Scaffold	full	SOAPdenovo v. 1.05	437.0x	Illumina GAIIx		GCA_000709575.1	GCF_000709575.1	yes	NC_000001.11	100	167	3.05e-82	309	bacteria
NZ_AUNH01000085.1:1554-1721	HSATII	NZ_AUNH01000085.1	HSATII	168	2210	1721	1554	8.7e-43	153.1	13.9	Mycobacterium tuberculosis Mtb194 contig_105, whole genome shotgun sequence	WP_078447263.1	Mtb194v1	Mycobacterium tuberculosis Mtb194 (high GC Gram+)	strain=Mtb194	1354276	SAMN02864882	PRJNA210727	Institute of Microbiology Chinese Academy of Sciences	2014-6-17	n/a	major	Scaffold	full	SOAPdenovo v. 1.05	437.0x	Illumina GAIIx		GCA_000709575.1	GCF_000709575.1	yes	NC_000001.11	99.405	168	3.97e-81	305	bacteria
NZ_AUNH01000085.1:1843-2007	HSATII	NZ_AUNH01000085.1	HSATII	160	2210	2007	1843	1.5e-43	155.6	8.4	Mycobacterium tuberculosis Mtb194 contig_105, whole genome shotgun sequence	WP_078447263.1	Mtb194v1	Mycobacterium tuberculosis Mtb194 (high GC Gram+)	strain=Mtb194	1354276	SAMN02864882	PRJNA210727	Institute of Microbiology Chinese Academy of Sciences	2014-6-17	n/a	major	Scaffold	full	SOAPdenovo v. 1.05	437.0x	Illumina GAIIx		GCA_000709575.1	GCF_000709575.1	yes	NC_000001.11	98.529	136	1.11e-61	241	bacteria
NZ_AUNH01000085.1:2105-2210	HSATII	NZ_AUNH01000085.1	HSATII	100	2210	2210	2105	2.2e-20	80.1	8.5	Mycobacterium tuberculosis Mtb194 contig_105, whole genome shotgun sequence	WP_078447263.1	Mtb194v1	Mycobacterium tuberculosis Mtb194 (high GC Gram+)	strain=Mtb194	1354276	SAMN02864882	PRJNA210727	Institute of Microbiology Chinese Academy of Sciences	2014-6-17	n/a	major	Scaffold	full	SOAPdenovo v. 1.05	437.0x	Illumina GAIIx		GCA_000709575.1	GCF_000709575.1	yes	NC_000001.11	99.057	106	6.54e-47	191	bacteria
NZ_AUNH01000085.1:310-435	HSATII	NZ_AUNH01000085.1	HSATII	123	2210	435	310	1.1e-28	107.2	10.1	Mycobacterium tuberculosis Mtb194 contig_105, whole genome shotgun sequence	WP_078447263.1	Mtb194v1	Mycobacterium tuberculosis Mtb194 (high GC Gram+)	strain=Mtb194	1354276	SAMN02864882	PRJNA210727	Institute of Microbiology Chinese Academy of Sciences	2014-6-17	n/a	major	Scaffold	full	SOAPdenovo v. 1.05	437.0x	Illumina GAIIx		GCA_000709575.1	GCF_000709575.1	yes	NC_000010.11	97.619	126	1.34e-54	217	bacteria
NZ_AUNH01000085.1:530-694	HSATII	NZ_AUNH01000085.1	HSATII	167	2210	694	530	6.7e-40	143.7	14.1	Mycobacterium tuberculosis Mtb194 contig_105, whole genome shotgun sequence	WP_078447263.1	Mtb194v1	Mycobacterium tuberculosis Mtb194 (high GC Gram+)	strain=Mtb194	1354276	SAMN02864882	PRJNA210727	Institute of Microbiology Chinese Academy of Sciences	2014-6-17	n/a	major	Scaffold	full	SOAPdenovo v. 1.05	437.0x	Illumina GAIIx		GCA_000709575.1	GCF_000709575.1	yes	NC_000001.11	100	165	3.88e-81	305	bacteria
NZ_AUNH01000085.1:695-871	HSATII	NZ_AUNH01000085.1	HSATII	163	2210	871	695	5.6e-22	85.3	38.3	Mycobacterium tuberculosis Mtb194 contig_105, whole genome shotgun sequence	WP_078447263.1	Mtb194v1	Mycobacterium tuberculosis Mtb194 (high GC Gram+)	strain=Mtb194	1354276	SAMN02864882	PRJNA210727	Institute of Microbiology Chinese Academy of Sciences	2014-6-17	n/a	major	Scaffold	full	SOAPdenovo v. 1.05	437.0x	Illumina GAIIx		GCA_000709575.1	GCF_000709575.1	yes	NC_000001.11	88.811	143	3.46e-42	176	bacteria
NZ_AUNH01000085.1:929-1115	HSATII	NZ_AUNH01000085.1	HSATII	164	2210	1115	929	2.3e-19	76.8	48.3	Mycobacterium tuberculosis Mtb194 contig_105, whole genome shotgun sequence	WP_078447263.1	Mtb194v1	Mycobacterium tuberculosis Mtb194 (high GC Gram+)	strain=Mtb194	1354276	SAMN02864882	PRJNA210727	Institute of Microbiology Chinese Academy of Sciences	2014-6-17	n/a	major	Scaffold	full	SOAPdenovo v. 1.05	437.0x	Illumina GAIIx		GCA_000709575.1	GCF_000709575.1	yes	NC_000001.11	80.473	169	2.91e-28	130	bacteria
NZ_AUPO01000006.1:1-201	LINE	NZ_AUPO01000006.1	L1P1_orf2	200	201	1	201	3.4e-63	217.4	22.5	Mycobacterium tuberculosis Mtb43 contig_6, whole genome shotgun sequence		Mtb43v1	Mycobacterium tuberculosis Mtb43 (high GC Gram+)	strain=Mtb43	1353527	SAMN02864886	PRJNA210122	Institute Of Microbiology Chinese Academy of Sciences	2014-6-17	n/a	major	Scaffold	full	SOAPdenovo v. 1.05	225.0x	Illumina GAIIx		GCA_000709595.1	GCF_000709595.1	yes	NC_000002.12	99.005	201	1.03e-97	361	bacteria
NZ_AUPO01000078.1:1-305	LINE	NZ_AUPO01000078.1	L1P1_orf2	304	305	1	305	5.3e-109	369.4	10.6	Mycobacterium tuberculosis Mtb43 contig_78, whole genome shotgun sequence		Mtb43v1	Mycobacterium tuberculosis Mtb43 (high GC Gram+)	strain=Mtb43	1353527	SAMN02864886	PRJNA210122	Institute Of Microbiology Chinese Academy of Sciences	2014-6-17	n/a	major	Scaffold	full	SOAPdenovo v. 1.05	225.0x	Illumina GAIIx		GCA_000709595.1	GCF_000709595.1	yes	NC_000005.10	98.689	305	5.48e-152	542	bacteria
NZ_AUPO01000081.1:1-324	LINE	NZ_AUPO01000081.1	L1HS_3end	323	324	324	1	5.8e-112	381.3	13.4	Mycobacterium tuberculosis Mtb43 contig_81, whole genome shotgun sequence		Mtb43v1	Mycobacterium tuberculosis Mtb43 (high GC Gram+)	strain=Mtb43	1353527	SAMN02864886	PRJNA210122	Institute Of Microbiology Chinese Academy of Sciences	2014-6-17	n/a	major	Scaffold	full	SOAPdenovo v. 1.05	225.0x	Illumina GAIIx		GCA_000709595.1	GCF_000709595.1	yes	NC_000002.12	98.148	324	3.48e-159	566	bacteria
NZ_AUPX01000026.1:1-152	Sat	NZ_AUPX01000026.1	ALR	144	364	152	1	7e-36	131.3	10.6	Mycobacterium tuberculosis Mtb293 contig_27, whole genome shotgun sequence		Mtb293v1	Mycobacterium tuberculosis Mtb293 (high GC Gram+)	strain=Mtb293	1355018	SAMN02864883	PRJNA210813	Institute of Microbiology Chinese Academy of Sciences	2014-6-17	n/a	major	Scaffold	full	SOAPdenovo v. 1.05	433.0x	Illumina GAIIx		GCA_000709615.1	GCF_000709615.1	yes	NC_000013.11	100	152	5.93e-74	281	bacteria
NZ_AUPX01000026.1:153-322	Sat	NZ_AUPX01000026.1	ALR	169	364	322	153	2.8e-38	139.1	4.5	Mycobacterium tuberculosis Mtb293 contig_27, whole genome shotgun sequence		Mtb293v1	Mycobacterium tuberculosis Mtb293 (high GC Gram+)	strain=Mtb293	1355018	SAMN02864883	PRJNA210813	Institute of Microbiology Chinese Academy of Sciences	2014-6-17	n/a	major	Scaffold	full	SOAPdenovo v. 1.05	433.0x	Illumina GAIIx		GCA_000709615.1	GCF_000709615.1	yes	NC_000013.11	100	170	6.69e-84	315	bacteria
NZ_AURO01000091.1:92-231	Alu	NZ_AURO01000091.1	AluY	131	231	231	92	5.2e-35	128.1	4.3	Salmonella enterica subsp. enterica serovar Heidelberg str. CFSAN002061 CFSAN002061_134, whole genome shotgun sequence		ASM341392v1	Salmonella enterica subsp. enterica serovar Heidelberg str. CFSAN002061 (enterobacteria)	strain=CFSAN002061	1299041	SAMN01933199	PRJNA191766	FDA	2018-8-22	n/a	major	Contig	full	CLC Genomics Workbench v. 6	52x	Illumina MiSeq		GCA_003413925.1	GCF_003413925.1	yes	NC_000003.12	95.714	140	2.54e-57	226	bacteria
NZ_AUTF01000012.1:419-587	HSATII	NZ_AUTF01000012.1	HSATII	168	1140	419	587	2.9e-43	154.6	9.6	Mycobacterium tuberculosis Mtb526 contig_12, whole genome shotgun sequence		Mtb526v1	Mycobacterium tuberculosis Mtb526 (high GC Gram+)	strain=Mtb526	1355019	SAMN02864885	PRJNA210816	Institute of Microbiology Chinese Academy of Sciences	2014-6-17	n/a	major	Scaffold	full	SOAPdenovo v. 1.05	462.0x	Illumina GAIIx		GCA_000709635.1	GCF_000709635.1	yes	NC_000016.10	97.633	169	1.12e-76	291	bacteria
NZ_AUTF01000012.1:888-1043	HSATII	NZ_AUTF01000012.1	HSATII	151	1140	888	1043	2.2e-38	138.8	12.6	Mycobacterium tuberculosis Mtb526 contig_12, whole genome shotgun sequence		Mtb526v1	Mycobacterium tuberculosis Mtb526 (high GC Gram+)	strain=Mtb526	1355019	SAMN02864885	PRJNA210816	Institute of Microbiology Chinese Academy of Sciences	2014-6-17	n/a	major	Scaffold	full	SOAPdenovo v. 1.05	462.0x	Illumina GAIIx		GCA_000709635.1	GCF_000709635.1	yes	NC_000001.11	92.258	155	4.86e-55	219	bacteria
NZ_AUTF01000012.1:90-244	HSATII	NZ_AUTF01000012.1	HSATII	152	1140	90	244	1e-32	120.3	23	Mycobacterium tuberculosis Mtb526 contig_12, whole genome shotgun sequence		Mtb526v1	Mycobacterium tuberculosis Mtb526 (high GC Gram+)	strain=Mtb526	1355019	SAMN02864885	PRJNA210816	Institute of Microbiology Chinese Academy of Sciences	2014-6-17	n/a	major	Scaffold	full	SOAPdenovo v. 1.05	462.0x	Illumina GAIIx		GCA_000709635.1	GCF_000709635.1	yes	NC_000016.10	99.355	155	6.07e-74	281	bacteria
NZ_AUTF01000018.1:1107-1214	Sat	NZ_AUTF01000018.1	ALR	120	1214	1214	1107	2.8e-15	64.2	6.9	Mycobacterium tuberculosis Mtb526 contig_18, whole genome shotgun sequence		Mtb526v1	Mycobacterium tuberculosis Mtb526 (high GC Gram+)	strain=Mtb526	1355019	SAMN02864885	PRJNA210816	Institute of Microbiology Chinese Academy of Sciences	2014-6-17	n/a	major	Scaffold	full	SOAPdenovo v. 1.05	462.0x	Illumina GAIIx		GCA_000709635.1	GCF_000709635.1	yes	NC_000016.10	100	58	6.95e-22	108	bacteria
NZ_AUTF01000018.1:279-418	Sat	NZ_AUTF01000018.1	ALR	138	1214	418	279	5.2e-30	112.2	5.9	Mycobacterium tuberculosis Mtb526 contig_18, whole genome shotgun sequence		Mtb526v1	Mycobacterium tuberculosis Mtb526 (high GC Gram+)	strain=Mtb526	1355019	SAMN02864885	PRJNA210816	Institute of Microbiology Chinese Academy of Sciences	2014-6-17	n/a	major	Scaffold	full	SOAPdenovo v. 1.05	462.0x	Illumina GAIIx		GCA_000709635.1	GCF_000709635.1	yes	NC_000016.10	100	130	9.08e-62	241	bacteria
NZ_AUTF01000018.1:35-203	Sat	NZ_AUTF01000018.1	ALR	168	1214	203	35	5.1e-42	151.3	5	Mycobacterium tuberculosis Mtb526 contig_18, whole genome shotgun sequence		Mtb526v1	Mycobacterium tuberculosis Mtb526 (high GC Gram+)	strain=Mtb526	1355019	SAMN02864885	PRJNA210816	Institute of Microbiology Chinese Academy of Sciences	2014-6-17	n/a	major	Scaffold	full	SOAPdenovo v. 1.05	462.0x	Illumina GAIIx		GCA_000709635.1	GCF_000709635.1	yes	NC_000001.11	98.817	169	5.17e-80	302	bacteria
NZ_AUTF01000018.1:420-588	Sat	NZ_AUTF01000018.1	ALR	168	1214	588	420	6.5e-37	134.7	6.1	Mycobacterium tuberculosis Mtb526 contig_18, whole genome shotgun sequence		Mtb526v1	Mycobacterium tuberculosis Mtb526 (high GC Gram+)	strain=Mtb526	1355019	SAMN02864885	PRJNA210816	Institute of Microbiology Chinese Academy of Sciences	2014-6-17	n/a	major	Scaffold	full	SOAPdenovo v. 1.05	462.0x	Illumina GAIIx		GCA_000709635.1	GCF_000709635.1	yes	NC_000016.10	98.16	163	5.21e-75	285	bacteria
NZ_AUTF01000018.1:590-758	Sat	NZ_AUTF01000018.1	ALR	168	1214	758	590	8.5e-41	147.3	6.7	Mycobacterium tuberculosis Mtb526 contig_18, whole genome shotgun sequence		Mtb526v1	Mycobacterium tuberculosis Mtb526 (high GC Gram+)	strain=Mtb526	1355019	SAMN02864885	PRJNA210816	Institute of Microbiology Chinese Academy of Sciences	2014-6-17	n/a	major	Scaffold	full	SOAPdenovo v. 1.05	462.0x	Illumina GAIIx		GCA_000709635.1	GCF_000709635.1	yes	NC_000001.11	97.633	169	1.12e-76	291	bacteria
NZ_AUTF01000018.1:760-935	Sat	NZ_AUTF01000018.1	ALR	167	1214	935	760	2.2e-32	119.9	5.2	Mycobacterium tuberculosis Mtb526 contig_18, whole genome shotgun sequence		Mtb526v1	Mycobacterium tuberculosis Mtb526 (high GC Gram+)	strain=Mtb526	1355019	SAMN02864885	PRJNA210816	Institute of Microbiology Chinese Academy of Sciences	2014-6-17	n/a	major	Scaffold	full	SOAPdenovo v. 1.05	462.0x	Illumina GAIIx		GCA_000709635.1	GCF_000709635.1	yes	NC_000001.11	85.632	174	3.43e-42	176	bacteria
NZ_AUTF01000018.1:937-1104	Sat	NZ_AUTF01000018.1	ALR	169	1214	1104	937	7.7e-38	137.7	7.6	Mycobacterium tuberculosis Mtb526 contig_18, whole genome shotgun sequence		Mtb526v1	Mycobacterium tuberculosis Mtb526 (high GC Gram+)	strain=Mtb526	1355019	SAMN02864885	PRJNA210816	Institute of Microbiology Chinese Academy of Sciences	2014-6-17	n/a	major	Scaffold	full	SOAPdenovo v. 1.05	462.0x	Illumina GAIIx		GCA_000709635.1	GCF_000709635.1	yes	NC_000016.10	98.802	167	6.64e-79	298	bacteria
NZ_AUTF01000030.1:1107-1269	HSATII	NZ_AUTF01000030.1	HSATII	168	1313	1269	1107	1.7e-35	129.3	14	Mycobacterium tuberculosis Mtb526 contig_30, whole genome shotgun sequence	WP_029401717.1	Mtb526v1	Mycobacterium tuberculosis Mtb526 (high GC Gram+)	strain=Mtb526	1355019	SAMN02864885	PRJNA210816	Institute of Microbiology Chinese Academy of Sciences	2014-6-17	n/a	major	Scaffold	full	SOAPdenovo v. 1.05	462.0x	Illumina GAIIx		GCA_000709635.1	GCF_000709635.1	yes	NC_000016.10	89.286	168	3.99e-51	206	bacteria
NZ_AUTF01000030.1:126-266	HSATII	NZ_AUTF01000030.1	HSATII	136	1313	266	126	5.4e-30	111.4	9.5	Mycobacterium tuberculosis Mtb526 contig_30, whole genome shotgun sequence	WP_029401717.1	Mtb526v1	Mycobacterium tuberculosis Mtb526 (high GC Gram+)	strain=Mtb526	1355019	SAMN02864885	PRJNA210816	Institute of Microbiology Chinese Academy of Sciences	2014-6-17	n/a	major	Scaffold	full	SOAPdenovo v. 1.05	462.0x	Illumina GAIIx		GCA_000709635.1	GCF_000709635.1	yes	NC_000016.10	98.462	130	7.13e-58	228	bacteria
NZ_AUTF01000030.1:387-536	HSATII	NZ_AUTF01000030.1	HSATII	147	1313	536	387	2.7e-33	122.2	15.4	Mycobacterium tuberculosis Mtb526 contig_30, whole genome shotgun sequence	WP_029401717.1	Mtb526v1	Mycobacterium tuberculosis Mtb526 (high GC Gram+)	strain=Mtb526	1355019	SAMN02864885	PRJNA210816	Institute of Microbiology Chinese Academy of Sciences	2014-6-17	n/a	major	Scaffold	full	SOAPdenovo v. 1.05	462.0x	Illumina GAIIx		GCA_000709635.1	GCF_000709635.1	yes	NC_000016.10	90.78	141	1.31e-45	187	bacteria
NZ_AUTF01000030.1:606-774	HSATII	NZ_AUTF01000030.1	HSATII	168	1313	774	606	2.3e-45	161.5	12.6	Mycobacterium tuberculosis Mtb526 contig_30, whole genome shotgun sequence	WP_029401717.1	Mtb526v1	Mycobacterium tuberculosis Mtb526 (high GC Gram+)	strain=Mtb526	1355019	SAMN02864885	PRJNA210816	Institute of Microbiology Chinese Academy of Sciences	2014-6-17	n/a	major	Scaffold	full	SOAPdenovo v. 1.05	462.0x	Illumina GAIIx		GCA_000709635.1	GCF_000709635.1	yes	NC_000016.10	97.633	169	1.12e-76	291	bacteria
NZ_AUTF01000030.1:775-938	HSATII	NZ_AUTF01000030.1	HSATII	169	1313	938	775	6.3e-34	124.2	10.7	Mycobacterium tuberculosis Mtb526 contig_30, whole genome shotgun sequence	WP_029401717.1	Mtb526v1	Mycobacterium tuberculosis Mtb526 (high GC Gram+)	strain=Mtb526	1355019	SAMN02864885	PRJNA210816	Institute of Microbiology Chinese Academy of Sciences	2014-6-17	n/a	major	Scaffold	full	SOAPdenovo v. 1.05	462.0x	Illumina GAIIx		GCA_000709635.1	GCF_000709635.1	yes	NC_000016.10	98.171	164	1.4e-75	287	bacteria
NZ_AUTF01000046.1:1161-1338	HSATII	NZ_AUTF01000046.1	HSATII	168	1511	1161	1338	1.4e-36	132.9	16.5	Mycobacterium tuberculosis Mtb526 contig_46, whole genome shotgun sequence		Mtb526v1	Mycobacterium tuberculosis Mtb526 (high GC Gram+)	strain=Mtb526	1355019	SAMN02864885	PRJNA210816	Institute of Microbiology Chinese Academy of Sciences	2014-6-17	n/a	major	Scaffold	full	SOAPdenovo v. 1.05	462.0x	Illumina GAIIx		GCA_000709635.1	GCF_000709635.1	yes	NC_000016.10	98.876	178	5.46e-85	318	bacteria
NZ_AUTF01000046.1:1339-1508	HSATII	NZ_AUTF01000046.1	HSATII	169	1511	1339	1508	2.3e-40	145.2	16.2	Mycobacterium tuberculosis Mtb526 contig_46, whole genome shotgun sequence		Mtb526v1	Mycobacterium tuberculosis Mtb526 (high GC Gram+)	strain=Mtb526	1355019	SAMN02864885	PRJNA210816	Institute of Microbiology Chinese Academy of Sciences	2014-6-17	n/a	major	Scaffold	full	SOAPdenovo v. 1.05	462.0x	Illumina GAIIx		GCA_000709635.1	GCF_000709635.1	yes	NC_000016.10	100	170	6.69e-84	315	bacteria
NZ_AUTF01000046.1:197-366	HSATII	NZ_AUTF01000046.1	HSATII	166	1511	197	366	4.5e-41	147.5	10.3	Mycobacterium tuberculosis Mtb526 contig_46, whole genome shotgun sequence		Mtb526v1	Mycobacterium tuberculosis Mtb526 (high GC Gram+)	strain=Mtb526	1355019	SAMN02864885	PRJNA210816	Institute of Microbiology Chinese Academy of Sciences	2014-6-17	n/a	major	Scaffold	full	SOAPdenovo v. 1.05	462.0x	Illumina GAIIx		GCA_000709635.1	GCF_000709635.1	yes	NC_000016.10	99.412	170	3.11e-82	309	bacteria
NZ_AUTF01000046.1:367-532	HSATII	NZ_AUTF01000046.1	HSATII	168	1511	367	532	3.2e-40	144.7	17.8	Mycobacterium tuberculosis Mtb526 contig_46, whole genome shotgun sequence		Mtb526v1	Mycobacterium tuberculosis Mtb526 (high GC Gram+)	strain=Mtb526	1355019	SAMN02864885	PRJNA210816	Institute of Microbiology Chinese Academy of Sciences	2014-6-17	n/a	major	Scaffold	full	SOAPdenovo v. 1.05	462.0x	Illumina GAIIx		GCA_000709635.1	GCF_000709635.1	yes	NC_000016.10	98.795	166	2.35e-78	296	bacteria
NZ_AUTF01000046.1:680-851	HSATII	NZ_AUTF01000046.1	HSATII	168	1511	680	851	4e-38	137.9	17.6	Mycobacterium tuberculosis Mtb526 contig_46, whole genome shotgun sequence		Mtb526v1	Mycobacterium tuberculosis Mtb526 (high GC Gram+)	strain=Mtb526	1355019	SAMN02864885	PRJNA210816	Institute of Microbiology Chinese Academy of Sciences	2014-6-17	n/a	major	Scaffold	full	SOAPdenovo v. 1.05	462.0x	Illumina GAIIx		GCA_000709635.1	GCF_000709635.1	yes	NC_000016.10	92.216	167	1.51e-60	237	bacteria
NZ_AUTF01000046.1:96-196	HSATII	NZ_AUTF01000046.1	HSATII	90	1511	96	196	7.5e-16	65.3	4.1	Mycobacterium tuberculosis Mtb526 contig_46, whole genome shotgun sequence		Mtb526v1	Mycobacterium tuberculosis Mtb526 (high GC Gram+)	strain=Mtb526	1355019	SAMN02864885	PRJNA210816	Institute of Microbiology Chinese Academy of Sciences	2014-6-17	n/a	major	Scaffold	full	SOAPdenovo v. 1.05	462.0x	Illumina GAIIx		GCA_000709635.1	GCF_000709635.1	yes	NC_000016.10	96.739	92	8.04e-36	154	bacteria
NZ_AUTF01000046.1:983-1160	HSATII	NZ_AUTF01000046.1	HSATII	168	1511	983	1160	2.8e-37	135.2	17	Mycobacterium tuberculosis Mtb526 contig_46, whole genome shotgun sequence		Mtb526v1	Mycobacterium tuberculosis Mtb526 (high GC Gram+)	strain=Mtb526	1355019	SAMN02864885	PRJNA210816	Institute of Microbiology Chinese Academy of Sciences	2014-6-17	n/a	major	Scaffold	full	SOAPdenovo v. 1.05	462.0x	Illumina GAIIx		GCA_000709635.1	GCF_000709635.1	yes	NC_000016.10	98.315	178	2.54e-83	313	bacteria
NZ_AUTF01000074.1:101-267	Sat	NZ_AUTF01000074.1	ALR	170	1989	101	267	9.7e-37	134.1	8.2	Mycobacterium tuberculosis Mtb526 contig_74, whole genome shotgun sequence		Mtb526v1	Mycobacterium tuberculosis Mtb526 (high GC Gram+)	strain=Mtb526	1355019	SAMN02864885	PRJNA210816	Institute of Microbiology Chinese Academy of Sciences	2014-6-17	n/a	major	Scaffold	full	SOAPdenovo v. 1.05	462.0x	Illumina GAIIx		GCA_000709635.1	GCF_000709635.1	yes	NC_000020.11	98.71	155	3.09e-72	276	bacteria
NZ_AUTF01000074.1:1-100	Sat	NZ_AUTF01000074.1	ALR	99	1989	1	100	6.1e-19	76.1	4.3	Mycobacterium tuberculosis Mtb526 contig_74, whole genome shotgun sequence		Mtb526v1	Mycobacterium tuberculosis Mtb526 (high GC Gram+)	strain=Mtb526	1355019	SAMN02864885	PRJNA210816	Institute of Microbiology Chinese Academy of Sciences	2014-6-17	n/a	major	Scaffold	full	SOAPdenovo v. 1.05	462.0x	Illumina GAIIx		GCA_000709635.1	GCF_000709635.1	yes	NC_000004.12	100	100	2.81e-45	185	bacteria
NZ_AUTF01000074.1:1119-1288	Sat	NZ_AUTF01000074.1	ALR	170	1989	1119	1288	1.5e-42	153	8.5	Mycobacterium tuberculosis Mtb526 contig_74, whole genome shotgun sequence		Mtb526v1	Mycobacterium tuberculosis Mtb526 (high GC Gram+)	strain=Mtb526	1355019	SAMN02864885	PRJNA210816	Institute of Microbiology Chinese Academy of Sciences	2014-6-17	n/a	major	Scaffold	full	SOAPdenovo v. 1.05	462.0x	Illumina GAIIx		GCA_000709635.1	GCF_000709635.1	yes	NC_000004.12	99.412	170	3.11e-82	309	bacteria
NZ_AUTF01000074.1:1289-1458	Sat	NZ_AUTF01000074.1	ALR	170	1989	1289	1458	1.2e-34	127.3	8	Mycobacterium tuberculosis Mtb526 contig_74, whole genome shotgun sequence		Mtb526v1	Mycobacterium tuberculosis Mtb526 (high GC Gram+)	strain=Mtb526	1355019	SAMN02864885	PRJNA210816	Institute of Microbiology Chinese Academy of Sciences	2014-6-17	n/a	major	Scaffold	full	SOAPdenovo v. 1.05	462.0x	Illumina GAIIx		GCA_000709635.1	GCF_000709635.1	yes	NC_000004.12	95.294	170	5.28e-70	268	bacteria
NZ_AUTF01000074.1:1459-1629	Sat	NZ_AUTF01000074.1	ALR	170	1989	1459	1629	6.4e-38	138	8.7	Mycobacterium tuberculosis Mtb526 contig_74, whole genome shotgun sequence		Mtb526v1	Mycobacterium tuberculosis Mtb526 (high GC Gram+)	strain=Mtb526	1355019	SAMN02864885	PRJNA210816	Institute of Microbiology Chinese Academy of Sciences	2014-6-17	n/a	major	Scaffold	full	SOAPdenovo v. 1.05	462.0x	Illumina GAIIx		GCA_000709635.1	GCF_000709635.1	yes	NC_000004.12	99.415	171	8.71e-83	311	bacteria
NZ_AUTF01000074.1:1630-1780	Sat	NZ_AUTF01000074.1	ALR	149	1989	1630	1780	1.7e-34	126.8	6	Mycobacterium tuberculosis Mtb526 contig_74, whole genome shotgun sequence		Mtb526v1	Mycobacterium tuberculosis Mtb526 (high GC Gram+)	strain=Mtb526	1355019	SAMN02864885	PRJNA210816	Institute of Microbiology Chinese Academy of Sciences	2014-6-17	n/a	major	Scaffold	full	SOAPdenovo v. 1.05	462.0x	Illumina GAIIx		GCA_000709635.1	GCF_000709635.1	yes	NC_000009.12	100	150	7.6e-73	278	bacteria
NZ_AUTF01000074.1:1781-1950	Sat	NZ_AUTF01000074.1	ALR	170	1989	1781	1950	1.3e-43	156.5	6.7	Mycobacterium tuberculosis Mtb526 contig_74, whole genome shotgun sequence		Mtb526v1	Mycobacterium tuberculosis Mtb526 (high GC Gram+)	strain=Mtb526	1355019	SAMN02864885	PRJNA210816	Institute of Microbiology Chinese Academy of Sciences	2014-6-17	n/a	major	Scaffold	full	SOAPdenovo v. 1.05	462.0x	Illumina GAIIx		GCA_000709635.1	GCF_000709635.1	yes	NC_000004.12	100	170	6.69e-84	315	bacteria
NZ_AUTF01000074.1:268-438	Sat	NZ_AUTF01000074.1	ALR	170	1989	268	438	4.7e-44	157.9	5	Mycobacterium tuberculosis Mtb526 contig_74, whole genome shotgun sequence		Mtb526v1	Mycobacterium tuberculosis Mtb526 (high GC Gram+)	strain=Mtb526	1355019	SAMN02864885	PRJNA210816	Institute of Microbiology Chinese Academy of Sciences	2014-6-17	n/a	major	Scaffold	full	SOAPdenovo v. 1.05	462.0x	Illumina GAIIx		GCA_000709635.1	GCF_000709635.1	yes	NC_000009.12	100	171	1.87e-84	316	bacteria
NZ_AUTF01000074.1:439-609	Sat	NZ_AUTF01000074.1	ALR	170	1989	439	609	1.1e-41	150.2	10.4	Mycobacterium tuberculosis Mtb526 contig_74, whole genome shotgun sequence		Mtb526v1	Mycobacterium tuberculosis Mtb526 (high GC Gram+)	strain=Mtb526	1355019	SAMN02864885	PRJNA210816	Institute of Microbiology Chinese Academy of Sciences	2014-6-17	n/a	major	Scaffold	full	SOAPdenovo v. 1.05	462.0x	Illumina GAIIx		GCA_000709635.1	GCF_000709635.1	yes	NC_000004.12	99.415	171	8.71e-83	311	bacteria
NZ_AUTF01000074.1:610-781	Sat	NZ_AUTF01000074.1	ALR	170	1989	610	781	2.8e-41	148.9	3.9	Mycobacterium tuberculosis Mtb526 contig_74, whole genome shotgun sequence		Mtb526v1	Mycobacterium tuberculosis Mtb526 (high GC Gram+)	strain=Mtb526	1355019	SAMN02864885	PRJNA210816	Institute of Microbiology Chinese Academy of Sciences	2014-6-17	n/a	major	Scaffold	full	SOAPdenovo v. 1.05	462.0x	Illumina GAIIx		GCA_000709635.1	GCF_000709635.1	yes	NC_000004.12	100	172	5.24e-85	318	bacteria
NZ_AUTF01000074.1:782-952	Sat	NZ_AUTF01000074.1	ALR	170	1989	782	952	1.3e-44	159.8	10.8	Mycobacterium tuberculosis Mtb526 contig_74, whole genome shotgun sequence		Mtb526v1	Mycobacterium tuberculosis Mtb526 (high GC Gram+)	strain=Mtb526	1355019	SAMN02864885	PRJNA210816	Institute of Microbiology Chinese Academy of Sciences	2014-6-17	n/a	major	Scaffold	full	SOAPdenovo v. 1.05	462.0x	Illumina GAIIx		GCA_000709635.1	GCF_000709635.1	yes	NC_000004.12	96.45	169	8.84e-73	278	bacteria
NZ_AUTF01000074.1:953-1118	Sat	NZ_AUTF01000074.1	ALR	170	1989	953	1118	9.8e-40	143.9	8.4	Mycobacterium tuberculosis Mtb526 contig_74, whole genome shotgun sequence		Mtb526v1	Mycobacterium tuberculosis Mtb526 (high GC Gram+)	strain=Mtb526	1355019	SAMN02864885	PRJNA210816	Institute of Microbiology Chinese Academy of Sciences	2014-6-17	n/a	major	Scaffold	full	SOAPdenovo v. 1.05	462.0x	Illumina GAIIx		GCA_000709635.1	GCF_000709635.1	yes	NC_000004.12	95.882	170	3.97e-71	272	bacteria
NZ_AUTX01000043.1:1-160	HSATII	NZ_AUTX01000043.1	HSATII	153	1472	160	1	3.5e-11	50.2	27.2	Mycobacterium tuberculosis Mtb940 contig_43, whole genome shotgun sequence		Mtb940v1	Mycobacterium tuberculosis Mtb940 (high GC Gram+)	strain=Mtb940	1365190	SAMN02864847	PRJNA212149	Institute of Microbiology Chinese Academy of Sciences	2014-6-17	n/a	major	Scaffold	full	SOAPdenovo v. 1.05	561.0x	Illumina GAIIx		GCA_000709675.1	GCF_000709675.1	yes	NC_000004.12	88.125	160	1.09e-46	191	bacteria
NZ_AUTX01000043.1:1318-1472	HSATII	NZ_AUTX01000043.1	HSATII	163	1472	1472	1318	8.2e-11	48.9	26.2	Mycobacterium tuberculosis Mtb940 contig_43, whole genome shotgun sequence		Mtb940v1	Mycobacterium tuberculosis Mtb940 (high GC Gram+)	strain=Mtb940	1365190	SAMN02864847	PRJNA212149	Institute of Microbiology Chinese Academy of Sciences	2014-6-17	n/a	major	Scaffold	full	SOAPdenovo v. 1.05	561.0x	Illumina GAIIx		GCA_000709675.1	GCF_000709675.1	yes	NC_000010.11	90.604	149	6.29e-49	198	bacteria
NZ_AUTX01000043.1:417-621	HSATII	NZ_AUTX01000043.1	HSATII	154	1472	621	417	1.2e-13	58.2	34.6	Mycobacterium tuberculosis Mtb940 contig_43, whole genome shotgun sequence		Mtb940v1	Mycobacterium tuberculosis Mtb940 (high GC Gram+)	strain=Mtb940	1365190	SAMN02864847	PRJNA212149	Institute of Microbiology Chinese Academy of Sciences	2014-6-17	n/a	major	Scaffold	full	SOAPdenovo v. 1.05	561.0x	Illumina GAIIx		GCA_000709675.1	GCF_000709675.1	yes	NC_000010.11	86.765	204	4.02e-57	226	bacteria
NZ_AUWS01000129.1:170-558	LINE	NZ_AUWS01000129.1	L1P1_orf2	388	558	558	170	3.3e-134	450.1	52.7	Mycobacterium sp. UM_WWY Contig_129, whole genome shotgun sequence		Mycobacterium sp UM_WWY	Mycobacterium sp. UM_WWY (high GC Gram+)	strain=UM_WWY	1370121	SAMN02471848	PRJNA213254	Universiti Malaya, Kuala Lumpur	2013-8-26	n/a	major	Scaffold	full	CLC Bio Genomic Workbench v. 5.1.5	1000.0x	Illumina HiSeq		GCA_000455145.1	GCF_000455145.1	yes	NC_000001.11	99.229	389	0	702	bacteria
NZ_AUWS01000130.1:1-1132	LINE	NZ_AUWS01000130.1	L1P1_orf2	1131	1132	1132	1	0	1333.8	135.1	Mycobacterium sp. UM_WWY Contig_130, whole genome shotgun sequence		Mycobacterium sp UM_WWY	Mycobacterium sp. UM_WWY (high GC Gram+)	strain=UM_WWY	1370121	SAMN02471848	PRJNA213254	Universiti Malaya, Kuala Lumpur	2013-8-26	n/a	major	Scaffold	full	CLC Bio Genomic Workbench v. 5.1.5	1000.0x	Illumina HiSeq		GCA_000455145.1	GCF_000455145.1	yes	NC_000023.11	96.555	1132	0	1917	bacteria
NZ_AUZR02000040.1:1-1000	LINE	NZ_AUZR02000040.1	L1P1_orf2	998	1619	1	1000	0	1224.3	100	Pseudomonas syringae pv. pisi str. PP1 contig40.1, whole genome shotgun sequence	WP_032631523.1	PpiPP1_130925_2.0	Pseudomonas syringae pv. pisi str. PP1 (g-proteobacteria)	strain=PP1	1357292	SAMN02471574	PRJNA211606	University of Arizona	2013-11-27	n/a	major	Contig	full	SPAdes v. 2.5.0	70.0x	Illumina HiSeq		GCA_000452445.2	GCF_000452445.1	yes	NC_000001.11	97.802	1001	0	1725	bacteria
NZ_AUZR02000057.1:1-846	LINE	NZ_AUZR02000057.1	L1P1_orf2	844	847	846	1	1.2e-305	1022	61.5	Pseudomonas syringae pv. pisi str. PP1 contig57.1, whole genome shotgun sequence		PpiPP1_130925_2.0	Pseudomonas syringae pv. pisi str. PP1 (g-proteobacteria)	strain=PP1	1357292	SAMN02471574	PRJNA211606	University of Arizona	2013-11-27	n/a	major	Contig	full	SPAdes v. 2.5.0	70.0x	Illumina HiSeq		GCA_000452445.2	GCF_000452445.1	yes	NC_000003.12	96.437	842	0	1386	bacteria
NZ_AUZR02000063.1:219-584	LINE	NZ_AUZR02000063.1	L1HS_5end	362	585	584	219	4.1e-128	433.8	28.4	Pseudomonas syringae pv. pisi str. PP1 contig63.1, whole genome shotgun sequence	WP_077917101.1	PpiPP1_130925_2.0	Pseudomonas syringae pv. pisi str. PP1 (g-proteobacteria)	strain=PP1	1357292	SAMN02471574	PRJNA211606	University of Arizona	2013-11-27	n/a	major	Contig	full	SPAdes v. 2.5.0	70.0x	Illumina HiSeq		GCA_000452445.2	GCF_000452445.1	yes	NC_000001.11	98.898	363	0	649	bacteria
NZ_AUZR02000075.1:1-493	LINE	NZ_AUZR02000075.1	L1P1_orf2	487	493	493	1	1.1e-157	530.9	50.1	Pseudomonas syringae pv. pisi str. PP1 contig75.1, whole genome shotgun sequence		PpiPP1_130925_2.0	Pseudomonas syringae pv. pisi str. PP1 (g-proteobacteria)	strain=PP1	1357292	SAMN02471574	PRJNA211606	University of Arizona	2013-11-27	n/a	major	Contig	full	SPAdes v. 2.5.0	70.0x	Illumina HiSeq		GCA_000452445.2	GCF_000452445.1	yes	NC_000007.14	94.32	493	0	754	bacteria
NZ_AUZR02000102.1:1-131	Sat	NZ_AUZR02000102.1	BSR	129	339	1	131	2.1e-31	116.2	2	Pseudomonas syringae pv. pisi str. PP1 contig102.1, whole genome shotgun sequence		PpiPP1_130925_2.0	Pseudomonas syringae pv. pisi str. PP1 (g-proteobacteria)	strain=PP1	1357292	SAMN02471574	PRJNA211606	University of Arizona	2013-11-27	n/a	major	Contig	full	SPAdes v. 2.5.0	70.0x	Illumina HiSeq		GCA_000452445.2	GCF_000452445.1	yes	NC_000018.10	92.366	131	1.1e-45	187	bacteria
NZ_AUZR02000102.1:132-266	Sat	NZ_AUZR02000102.1	BSR	135	339	132	266	6.4e-33	121.1	0.9	Pseudomonas syringae pv. pisi str. PP1 contig102.1, whole genome shotgun sequence		PpiPP1_130925_2.0	Pseudomonas syringae pv. pisi str. PP1 (g-proteobacteria)	strain=PP1	1357292	SAMN02471574	PRJNA211606	University of Arizona	2013-11-27	n/a	major	Contig	full	SPAdes v. 2.5.0	70.0x	Illumina HiSeq		GCA_000452445.2	GCF_000452445.1	yes	NT_167211.2	95.556	135	1.46e-54	217	bacteria
NZ_AUZR02000102.1:267-339	Sat	NZ_AUZR02000102.1	BSR	71	339	267	339	2.6e-12	54.3	0.4	Pseudomonas syringae pv. pisi str. PP1 contig102.1, whole genome shotgun sequence		PpiPP1_130925_2.0	Pseudomonas syringae pv. pisi str. PP1 (g-proteobacteria)	strain=PP1	1357292	SAMN02471574	PRJNA211606	University of Arizona	2013-11-27	n/a	major	Contig	full	SPAdes v. 2.5.0	70.0x	Illumina HiSeq		GCA_000452445.2	GCF_000452445.1	yes	NC_000004.12	91.667	72	6.61e-20	100	bacteria
NZ_AUZR02000114.1:1-288	LTR	NZ_AUZR02000114.1	THE1-int	286	289	1	288	1.3e-75	259.5	5	Pseudomonas syringae pv. pisi str. PP1 contig114.1, whole genome shotgun sequence		PpiPP1_130925_2.0	Pseudomonas syringae pv. pisi str. PP1 (g-proteobacteria)	strain=PP1	1357292	SAMN02471574	PRJNA211606	University of Arizona	2013-11-27	n/a	major	Contig	full	SPAdes v. 2.5.0	70.0x	Illumina HiSeq		GCA_000452445.2	GCF_000452445.1	yes	NC_000017.11	91.289	287	7.09e-106	388	bacteria
NZ_AUZR02000129.1:1-263	LTR	NZ_AUZR02000129.1	THE1-int	260	267	263	1	5.4e-83	283.9	0.4	Pseudomonas syringae pv. pisi str. PP1 contig129.1, whole genome shotgun sequence		PpiPP1_130925_2.0	Pseudomonas syringae pv. pisi str. PP1 (g-proteobacteria)	strain=PP1	1357292	SAMN02471574	PRJNA211606	University of Arizona	2013-11-27	n/a	major	Contig	full	SPAdes v. 2.5.0	70.0x	Illumina HiSeq		GCA_000452445.2	GCF_000452445.1	yes	NC_000007.14	94.186	258	4.95e-107	392	bacteria
NZ_AUZR02000131.1:1-263	DNATransposon	NZ_AUZR02000131.1	Tigger1	254	263	263	1	7.3e-67	229.9	23.5	Pseudomonas syringae pv. pisi str. PP1 contig131.1, whole genome shotgun sequence		PpiPP1_130925_2.0	Pseudomonas syringae pv. pisi str. PP1 (g-proteobacteria)	strain=PP1	1357292	SAMN02471574	PRJNA211606	University of Arizona	2013-11-27	n/a	major	Contig	full	SPAdes v. 2.5.0	70.0x	Illumina HiSeq		GCA_000452445.2	GCF_000452445.1	yes	NC_000007.14	95.2	250	3.83e-108	396	bacteria
NZ_AUZR02000136.1:14-241	LINE	NZ_AUZR02000136.1	L1PBa_5end	193	252	14	241	4.5e-16	60.9	18.5	Pseudomonas syringae pv. pisi str. PP1 contig136.1, whole genome shotgun sequence		PpiPP1_130925_2.0	Pseudomonas syringae pv. pisi str. PP1 (g-proteobacteria)	strain=PP1	1357292	SAMN02471574	PRJNA211606	University of Arizona	2013-11-27	n/a	major	Contig	full	SPAdes v. 2.5.0	70.0x	Illumina HiSeq		GCA_000452445.2	GCF_000452445.1	yes	NC_000018.10	93.506	231	5.59e-91	339	bacteria
NZ_AUZR02000158.1:1-216	LTR	NZ_AUZR02000158.1	ERVL	213	216	1	216	3.4e-62	211.9	1.5	Pseudomonas syringae pv. pisi str. PP1 contig158.1, whole genome shotgun sequence		PpiPP1_130925_2.0	Pseudomonas syringae pv. pisi str. PP1 (g-proteobacteria)	strain=PP1	1357292	SAMN02471574	PRJNA211606	University of Arizona	2013-11-27	n/a	major	Contig	full	SPAdes v. 2.5.0	70.0x	Illumina HiSeq		GCA_000452445.2	GCF_000452445.1	yes	NC_000023.11	96.714	213	1.88e-95	353	bacteria
NZ_AUZR02000161.1:1-214	LTR	NZ_AUZR02000161.1	THE1-int	213	214	214	1	2.6e-55	192.1	11.9	Pseudomonas syringae pv. pisi str. PP1 contig161.1, whole genome shotgun sequence		PpiPP1_130925_2.0	Pseudomonas syringae pv. pisi str. PP1 (g-proteobacteria)	strain=PP1	1357292	SAMN02471574	PRJNA211606	University of Arizona	2013-11-27	n/a	major	Contig	full	SPAdes v. 2.5.0	70.0x	Illumina HiSeq		GCA_000452445.2	GCF_000452445.1	yes	NC_000002.12	95.722	187	6.82e-80	302	bacteria
NZ_AUZR02000172.1:109-205	Sat	NZ_AUZR02000172.1	BSR	93	205	205	109	9.4e-21	81.7	1.5	Pseudomonas syringae pv. pisi str. PP1 contig172.1, whole genome shotgun sequence		PpiPP1_130925_2.0	Pseudomonas syringae pv. pisi str. PP1 (g-proteobacteria)	strain=PP1	1357292	SAMN02471574	PRJNA211606	University of Arizona	2013-11-27	n/a	major	Contig	full	SPAdes v. 2.5.0	70.0x	Illumina HiSeq		GCA_000452445.2	GCF_000452445.1	yes	NT_167219.1	93.258	89	3.56e-29	132	bacteria
NZ_AUZR02000172.1:1-108	Sat	NZ_AUZR02000172.1	BSR	107	205	108	1	9.9e-22	84.8	0.6	Pseudomonas syringae pv. pisi str. PP1 contig172.1, whole genome shotgun sequence		PpiPP1_130925_2.0	Pseudomonas syringae pv. pisi str. PP1 (g-proteobacteria)	strain=PP1	1357292	SAMN02471574	PRJNA211606	University of Arizona	2013-11-27	n/a	major	Contig	full	SPAdes v. 2.5.0	70.0x	Illumina HiSeq		GCA_000452445.2	GCF_000452445.1	yes	NC_000004.12	94.495	109	1.13e-39	167	bacteria
NZ_AVCR02000097.1:1-160	HSATII	NZ_AVCR02000097.1	HSATII	159	871	160	1	2.1e-43	155.1	14.7	Pseudomonas syringae pv. syringae 1212 contig97.1, whole genome shotgun sequence		Psy1212_130925_2.0	Pseudomonas syringae pv. syringae 1212 (g-proteobacteria)	strain=1212	1357293	SAMN02471561	PRJNA211607	University of Arizona	2013-11-27	n/a	major	Contig	full	SPAdes v. 2.5.0	70.0x	Illumina HiSeq		GCA_000452465.2	GCF_000452465.1	yes	NC_000016.10	98.125	160	2.27e-73	279	bacteria
NZ_AVCR02000097.1:285-454	HSATII	NZ_AVCR02000097.1	HSATII	168	871	454	285	1.4e-34	126.4	21.6	Pseudomonas syringae pv. syringae 1212 contig97.1, whole genome shotgun sequence		Psy1212_130925_2.0	Pseudomonas syringae pv. syringae 1212 (g-proteobacteria)	strain=1212	1357293	SAMN02471561	PRJNA211607	University of Arizona	2013-11-27	n/a	major	Contig	full	SPAdes v. 2.5.0	70.0x	Illumina HiSeq		GCA_000452465.2	GCF_000452465.1	yes	NC_000001.11	93.464	153	1.16e-56	224	bacteria
NZ_AVCR02000097.1:455-626	HSATII	NZ_AVCR02000097.1	HSATII	159	871	626	455	8.1e-42	149.9	12.8	Pseudomonas syringae pv. syringae 1212 contig97.1, whole genome shotgun sequence		Psy1212_130925_2.0	Pseudomonas syringae pv. syringae 1212 (g-proteobacteria)	strain=1212	1357293	SAMN02471561	PRJNA211607	University of Arizona	2013-11-27	n/a	major	Contig	full	SPAdes v. 2.5.0	70.0x	Illumina HiSeq		GCA_000452465.2	GCF_000452465.1	yes	NC_000001.11	99.419	172	2.44e-83	313	bacteria
NZ_AVCR02000097.1:628-804	HSATII	NZ_AVCR02000097.1	HSATII	167	871	804	628	5.5e-36	131	13.5	Pseudomonas syringae pv. syringae 1212 contig97.1, whole genome shotgun sequence		Psy1212_130925_2.0	Pseudomonas syringae pv. syringae 1212 (g-proteobacteria)	strain=1212	1357293	SAMN02471561	PRJNA211607	University of Arizona	2013-11-27	n/a	major	Contig	full	SPAdes v. 2.5.0	70.0x	Illumina HiSeq		GCA_000452465.2	GCF_000452465.1	yes	NC_000001.11	99.435	177	4.2e-86	322	bacteria
NZ_AVCR02000100.1:1-793	LTR	NZ_AVCR02000100.1	THE1-int	792	832	793	1	1e-278	932.7	19.5	Pseudomonas syringae pv. syringae 1212 contig100.1, whole genome shotgun sequence	WP_024651033.1	Psy1212_130925_2.0	Pseudomonas syringae pv. syringae 1212 (g-proteobacteria)	strain=1212	1357293	SAMN02471561	PRJNA211607	University of Arizona	2013-11-27	n/a	major	Contig	full	SPAdes v. 2.5.0	70.0x	Illumina HiSeq		GCA_000452465.2	GCF_000452465.1	yes	NC_000011.10	89.786	793	0	1013	bacteria
NZ_AVCR02000104.1:264-715	LTR	NZ_AVCR02000104.1	THE1-int	461	716	715	264	6.4e-149	502.4	3.1	Pseudomonas syringae pv. syringae 1212 contig104.1, whole genome shotgun sequence		Psy1212_130925_2.0	Pseudomonas syringae pv. syringae 1212 (g-proteobacteria)	strain=1212	1357293	SAMN02471561	PRJNA211607	University of Arizona	2013-11-27	n/a	major	Contig	full	SPAdes v. 2.5.0	70.0x	Illumina HiSeq		GCA_000452465.2	GCF_000452465.1	yes	NC_000013.11	90.2	449	4.95e-164	582	bacteria
NZ_AVCR02000104.1:9-263	LTR	NZ_AVCR02000104.1	MSTB	276	716	263	9	5.7e-20	78.1	2.8	Pseudomonas syringae pv. syringae 1212 contig104.1, whole genome shotgun sequence		Psy1212_130925_2.0	Pseudomonas syringae pv. syringae 1212 (g-proteobacteria)	strain=1212	1357293	SAMN02471561	PRJNA211607	University of Arizona	2013-11-27	n/a	major	Contig	full	SPAdes v. 2.5.0	70.0x	Illumina HiSeq		GCA_000452465.2	GCF_000452465.1	yes	NC_000009.12	87.755	245	1.4e-72	278	bacteria
NZ_AVCR02000119.1:187-321	Sat	NZ_AVCR02000119.1	BSR	134	593	321	187	2.9e-28	106	2.2	Pseudomonas syringae pv. syringae 1212 contig119.1, whole genome shotgun sequence		Psy1212_130925_2.0	Pseudomonas syringae pv. syringae 1212 (g-proteobacteria)	strain=1212	1357293	SAMN02471561	PRJNA211607	University of Arizona	2013-11-27	n/a	major	Contig	full	SPAdes v. 2.5.0	70.0x	Illumina HiSeq		GCA_000452465.2	GCF_000452465.1	yes	NT_167219.1	93.985	133	4.09e-50	202	bacteria
NZ_AVCR02000119.1:322-457	Sat	NZ_AVCR02000119.1	BSR	135	593	457	322	5.6e-36	131	0.8	Pseudomonas syringae pv. syringae 1212 contig119.1, whole genome shotgun sequence		Psy1212_130925_2.0	Pseudomonas syringae pv. syringae 1212 (g-proteobacteria)	strain=1212	1357293	SAMN02471561	PRJNA211607	University of Arizona	2013-11-27	n/a	major	Contig	full	SPAdes v. 2.5.0	70.0x	Illumina HiSeq		GCA_000452465.2	GCF_000452465.1	yes	NC_000018.10	91.406	128	2.51e-42	176	bacteria
NZ_AVCR02000119.1:458-589	Sat	NZ_AVCR02000119.1	BSR	131	593	589	458	2.7e-33	122.3	2.7	Pseudomonas syringae pv. syringae 1212 contig119.1, whole genome shotgun sequence		Psy1212_130925_2.0	Pseudomonas syringae pv. syringae 1212 (g-proteobacteria)	strain=1212	1357293	SAMN02471561	PRJNA211607	University of Arizona	2013-11-27	n/a	major	Contig	full	SPAdes v. 2.5.0	70.0x	Illumina HiSeq		GCA_000452465.2	GCF_000452465.1	yes	NC_000004.12	91.729	133	1.44e-44	183	bacteria
NZ_AVCR02000119.1:51-186	Sat	NZ_AVCR02000119.1	BSR	135	593	186	51	2.7e-37	135.3	1.8	Pseudomonas syringae pv. syringae 1212 contig119.1, whole genome shotgun sequence		Psy1212_130925_2.0	Pseudomonas syringae pv. syringae 1212 (g-proteobacteria)	strain=1212	1357293	SAMN02471561	PRJNA211607	University of Arizona	2013-11-27	n/a	major	Contig	full	SPAdes v. 2.5.0	70.0x	Illumina HiSeq		GCA_000452465.2	GCF_000452465.1	yes	NC_000018.10	97.794	136	4.08e-60	235	bacteria
NZ_AVCR02000140.1:229-374	LTR	NZ_AVCR02000140.1	MSTB	123	380	229	374	1.2e-27	103.4	5.7	Pseudomonas syringae pv. syringae 1212 contig140.1, whole genome shotgun sequence		Psy1212_130925_2.0	Pseudomonas syringae pv. syringae 1212 (g-proteobacteria)	strain=1212	1357293	SAMN02471561	PRJNA211607	University of Arizona	2013-11-27	n/a	major	Contig	full	SPAdes v. 2.5.0	70.0x	Illumina HiSeq		GCA_000452465.2	GCF_000452465.1	yes	NC_000004.12	98.148	108	3.52e-46	189	bacteria
NZ_AVCR02000147.1:86-272	LTR	NZ_AVCR02000147.1	MSTB	213	372	86	272	7.6e-27	100.8	4.5	Pseudomonas syringae pv. syringae 1212 contig147.1, whole genome shotgun sequence		Psy1212_130925_2.0	Pseudomonas syringae pv. syringae 1212 (g-proteobacteria)	strain=1212	1357293	SAMN02471561	PRJNA211607	University of Arizona	2013-11-27	n/a	major	Contig	full	SPAdes v. 2.5.0	70.0x	Illumina HiSeq		GCA_000452465.2	GCF_000452465.1	yes	NC_000023.11	91.444	187	4.61e-66	255	bacteria
NZ_AVCR02000149.1:1-361	LTR	NZ_AVCR02000149.1	ERVL	359	361	361	1	9.2e-108	363.2	8.1	Pseudomonas syringae pv. syringae 1212 contig149.1, whole genome shotgun sequence		Psy1212_130925_2.0	Pseudomonas syringae pv. syringae 1212 (g-proteobacteria)	strain=1212	1357293	SAMN02471561	PRJNA211607	University of Arizona	2013-11-27	n/a	major	Contig	full	SPAdes v. 2.5.0	70.0x	Illumina HiSeq		GCA_000452465.2	GCF_000452465.1	yes	NC_000003.12	93.66	347	1.11e-144	518	bacteria
NZ_AVCR02000151.1:1-358	LINE	NZ_AVCR02000151.1	L1P1_orf2	355	358	358	1	4.1e-40	140.8	68.2	Pseudomonas syringae pv. syringae 1212 contig151.1, whole genome shotgun sequence	WP_024651278.1	Psy1212_130925_2.0	Pseudomonas syringae pv. syringae 1212 (g-proteobacteria)	strain=1212	1357293	SAMN02471561	PRJNA211607	University of Arizona	2013-11-27	n/a	major	Contig	full	SPAdes v. 2.5.0	70.0x	Illumina HiSeq		GCA_000452465.2	GCF_000452465.1	yes	NC_000007.14	90.643	342	1.13e-124	451	bacteria
NZ_AVCR02000159.1:45-329	LINE	NZ_AVCR02000159.1	L1P1_orf2	271	329	45	329	2.5e-41	144.8	27.8	Pseudomonas syringae pv. syringae 1212 contig159.1, whole genome shotgun sequence		Psy1212_130925_2.0	Pseudomonas syringae pv. syringae 1212 (g-proteobacteria)	strain=1212	1357293	SAMN02471561	PRJNA211607	University of Arizona	2013-11-27	n/a	major	Contig	full	SPAdes v. 2.5.0	70.0x	Illumina HiSeq		GCA_000452465.2	GCF_000452465.1	yes	NC_000023.11	91.176	272	2.54e-100	370	bacteria
NZ_AVCR02000171.1:1-287	LINE	NZ_AVCR02000171.1	L1PBa_5end	290	297	1	287	1.3e-79	271.8	31.5	Pseudomonas syringae pv. syringae 1212 contig171.1, whole genome shotgun sequence		Psy1212_130925_2.0	Pseudomonas syringae pv. syringae 1212 (g-proteobacteria)	strain=1212	1357293	SAMN02471561	PRJNA211607	University of Arizona	2013-11-27	n/a	major	Contig	full	SPAdes v. 2.5.0	70.0x	Illumina HiSeq		GCA_000452465.2	GCF_000452465.1	yes	NC_000003.12	91.77	243	9.33e-90	335	bacteria
NZ_AVCR02000179.1:38-270	LINE	NZ_AVCR02000179.1	L1HS_3end	196	283	38	270	4.8e-25	93.6	14	Pseudomonas syringae pv. syringae 1212 contig179.1, whole genome shotgun sequence		Psy1212_130925_2.0	Pseudomonas syringae pv. syringae 1212 (g-proteobacteria)	strain=1212	1357293	SAMN02471561	PRJNA211607	University of Arizona	2013-11-27	n/a	major	Contig	full	SPAdes v. 2.5.0	70.0x	Illumina HiSeq		GCA_000452465.2	GCF_000452465.1	yes	NC_000005.10	94.382	178	5.9e-71	272	bacteria
NZ_AVCR02000190.1:1-265	LINE	NZ_AVCR02000190.1	L1MC4_3end	275	265	265	1	1.1e-36	129.7	23.5	Pseudomonas syringae pv. syringae 1212 contig190.1, whole genome shotgun sequence		Psy1212_130925_2.0	Pseudomonas syringae pv. syringae 1212 (g-proteobacteria)	strain=1212	1357293	SAMN02471561	PRJNA211607	University of Arizona	2013-11-27	n/a	major	Contig	full	SPAdes v. 2.5.0	70.0x	Illumina HiSeq		GCA_000452465.2	GCF_000452465.1	yes	NC_000011.10	90.119	253	1.85e-86	324	bacteria
NZ_AVCR02000196.1:5-253	LINE	NZ_AVCR02000196.1	L1P1_orf2	228	253	5	253	7.9e-18	66.8	37.3	Pseudomonas syringae pv. syringae 1212 contig196.1, whole genome shotgun sequence		Psy1212_130925_2.0	Pseudomonas syringae pv. syringae 1212 (g-proteobacteria)	strain=1212	1357293	SAMN02471561	PRJNA211607	University of Arizona	2013-11-27	n/a	major	Contig	full	SPAdes v. 2.5.0	70.0x	Illumina HiSeq		GCA_000452465.2	GCF_000452465.1	yes	NC_000020.11	91.286	241	3.7e-88	329	bacteria
NZ_AVCR02000198.1:1-252	LINE	NZ_AVCR02000198.1	L1P1_orf2	250	252	1	252	4.4e-42	147.3	40.2	Pseudomonas syringae pv. syringae 1212 contig198.1, whole genome shotgun sequence		Psy1212_130925_2.0	Pseudomonas syringae pv. syringae 1212 (g-proteobacteria)	strain=1212	1357293	SAMN02471561	PRJNA211607	University of Arizona	2013-11-27	n/a	major	Contig	full	SPAdes v. 2.5.0	70.0x	Illumina HiSeq		GCA_000452465.2	GCF_000452465.1	yes	NC_000004.12	90.204	245	3.78e-83	313	bacteria
NZ_AVCR02000199.1:1-98	Sat	NZ_AVCR02000199.1	ACRO1	96	250	98	1	2.9e-25	97.1	4.6	Pseudomonas syringae pv. syringae 1212 contig199.1, whole genome shotgun sequence		Psy1212_130925_2.0	Pseudomonas syringae pv. syringae 1212 (g-proteobacteria)	strain=1212	1357293	SAMN02471561	PRJNA211607	University of Arizona	2013-11-27	n/a	major	Contig	full	SPAdes v. 2.5.0	70.0x	Illumina HiSeq		GCA_000452465.2	GCF_000452465.1	yes	NC_000003.12	98.913	92	3.56e-39	165	bacteria
NZ_AVCR02000199.1:99-245	Sat	NZ_AVCR02000199.1	ACRO1	146	250	245	99	4.6e-32	119.2	15.8	Pseudomonas syringae pv. syringae 1212 contig199.1, whole genome shotgun sequence		Psy1212_130925_2.0	Pseudomonas syringae pv. syringae 1212 (g-proteobacteria)	strain=1212	1357293	SAMN02471561	PRJNA211607	University of Arizona	2013-11-27	n/a	major	Contig	full	SPAdes v. 2.5.0	70.0x	Illumina HiSeq		GCA_000452465.2	GCF_000452465.1	yes	NC_000022.11	99.32	147	1.59e-69	267	bacteria
NZ_AVCR02000207.1:1-239	DNATransposon	NZ_AVCR02000207.1	Tigger1	234	240	239	1	6.5e-72	246.6	11.3	Pseudomonas syringae pv. syringae 1212 contig207.1, whole genome shotgun sequence		Psy1212_130925_2.0	Pseudomonas syringae pv. syringae 1212 (g-proteobacteria)	strain=1212	1357293	SAMN02471561	PRJNA211607	University of Arizona	2013-11-27	n/a	major	Contig	full	SPAdes v. 2.5.0	70.0x	Illumina HiSeq		GCA_000452465.2	GCF_000452465.1	yes	NC_000014.9	93.991	233	2.1e-95	353	bacteria
NZ_AVCR02000212.1:2-237	LINE	NZ_AVCR02000212.1	L1P1_orf2	228	237	237	2	4.8e-17	64.2	38.2	Pseudomonas syringae pv. syringae 1212 contig212.1, whole genome shotgun sequence		Psy1212_130925_2.0	Pseudomonas syringae pv. syringae 1212 (g-proteobacteria)	strain=1212	1357293	SAMN02471561	PRJNA211607	University of Arizona	2013-11-27	n/a	major	Contig	full	SPAdes v. 2.5.0	70.0x	Illumina HiSeq		GCA_000452465.2	GCF_000452465.1	yes	NC_000018.10	91.379	232	2.71e-84	316	bacteria
NZ_AVCR02000216.1:32-200	Sat	NZ_AVCR02000216.1	ALR	168	235	32	200	9.1e-44	157	4.3	Pseudomonas syringae pv. syringae 1212 contig216.1, whole genome shotgun sequence		Psy1212_130925_2.0	Pseudomonas syringae pv. syringae 1212 (g-proteobacteria)	strain=1212	1357293	SAMN02471561	PRJNA211607	University of Arizona	2013-11-27	n/a	major	Contig	full	SPAdes v. 2.5.0	70.0x	Illumina HiSeq		GCA_000452465.2	GCF_000452465.1	yes	NC_000006.12	95.858	169	1.13e-71	274	bacteria
NZ_AVCR02000236.1:1-220	LTR	NZ_AVCR02000236.1	THE1-int	221	220	1	220	1.8e-61	212.6	4.6	Pseudomonas syringae pv. syringae 1212 contig236.1, whole genome shotgun sequence		Psy1212_130925_2.0	Pseudomonas syringae pv. syringae 1212 (g-proteobacteria)	strain=1212	1357293	SAMN02471561	PRJNA211607	University of Arizona	2013-11-27	n/a	major	Contig	full	SPAdes v. 2.5.0	70.0x	Illumina HiSeq		GCA_000452465.2	GCF_000452465.1	yes	NC_000003.12	94.619	223	4.15e-92	342	bacteria
NZ_AVCR02000259.1:9-203	HSATII	NZ_AVCR02000259.1	HSATII	160	205	9	203	2.2e-12	54.1	23.7	Pseudomonas syringae pv. syringae 1212 contig259.1, whole genome shotgun sequence		Psy1212_130925_2.0	Pseudomonas syringae pv. syringae 1212 (g-proteobacteria)	strain=1212	1357293	SAMN02471561	PRJNA211607	University of Arizona	2013-11-27	n/a	major	Contig	full	SPAdes v. 2.5.0	70.0x	Illumina HiSeq		GCA_000452465.2	GCF_000452465.1	yes	NT_187425.1	98.462	195	1e-92	344	bacteria
NZ_AVCR02000265.1:1-203	LINE	NZ_AVCR02000265.1	L1PBa_5end	214	203	1	203	2.5e-59	204.4	15.6	Pseudomonas syringae pv. syringae 1212 contig265.1, whole genome shotgun sequence		Psy1212_130925_2.0	Pseudomonas syringae pv. syringae 1212 (g-proteobacteria)	strain=1212	1357293	SAMN02471561	PRJNA211607	University of Arizona	2013-11-27	n/a	major	Contig	full	SPAdes v. 2.5.0	70.0x	Illumina HiSeq		GCA_000452465.2	GCF_000452465.1	yes	NC_000002.12	96.5	200	8.19e-89	331	bacteria
NZ_AVCR02000266.1:1-203	LINE	NZ_AVCR02000266.1	L1P1_orf2	200	203	203	1	3.4e-47	164.3	23.3	Pseudomonas syringae pv. syringae 1212 contig266.1, whole genome shotgun sequence		Psy1212_130925_2.0	Pseudomonas syringae pv. syringae 1212 (g-proteobacteria)	strain=1212	1357293	SAMN02471561	PRJNA211607	University of Arizona	2013-11-27	n/a	major	Contig	full	SPAdes v. 2.5.0	70.0x	Illumina HiSeq		GCA_000452465.2	GCF_000452465.1	yes	NC_000008.11	95.074	203	1.77e-85	320	bacteria
NZ_AVCR02000267.1:2-203	LINE	NZ_AVCR02000267.1	L1P1_orf2	204	203	203	2	2.4e-27	98.4	20.9	Pseudomonas syringae pv. syringae 1212 contig267.1, whole genome shotgun sequence		Psy1212_130925_2.0	Pseudomonas syringae pv. syringae 1212 (g-proteobacteria)	strain=1212	1357293	SAMN02471561	PRJNA211607	University of Arizona	2013-11-27	n/a	major	Contig	full	SPAdes v. 2.5.0	70.0x	Illumina HiSeq		GCA_000452465.2	GCF_000452465.1	yes	NC_000023.11	94.527	201	1.06e-82	311	bacteria
NZ_AVEA02000451.1:1-499	LINE	NZ_AVEA02000451.1	L1HS_3end	497	507	1	499	2.7e-170	574.2	24.2	Pseudomonas syringae CC94 contig451.1, whole genome shotgun sequence	WP_024642701.1	CC94_092313_2.0	Pseudomonas syringae CC94 (g-proteobacteria)	strain=CC94	1357286	SAMN02471551	PRJNA211414	University of Arizona	2013-11-26	n/a	major	Contig	full	SPAdes v. 2.5.0	50.0x	Illumina GAIIx		GCA_000452925.2	GCF_000452925.1	yes	NC_000006.12	97.8	500	0	861	bacteria
NZ_AVEA02000463.1:1-389	LINE	NZ_AVEA02000463.1	L1HS_3end	382	389	389	1	1.1e-136	462.9	22.4	Pseudomonas syringae CC94 contig463.1, whole genome shotgun sequence		CC94_092313_2.0	Pseudomonas syringae CC94 (g-proteobacteria)	strain=CC94	1357286	SAMN02471551	PRJNA211414	University of Arizona	2013-11-26	n/a	major	Contig	full	SPAdes v. 2.5.0	50.0x	Illumina GAIIx		GCA_000452925.2	GCF_000452925.1	yes	NC_000007.14	99.215	382	0	689	bacteria
NZ_AVEA02000464.1:1-385	LINE	NZ_AVEA02000464.1	L1P1_orf2	383	385	1	385	9.5e-140	471.3	31.4	Pseudomonas syringae CC94 contig464.1, whole genome shotgun sequence		CC94_092313_2.0	Pseudomonas syringae CC94 (g-proteobacteria)	strain=CC94	1357286	SAMN02471551	PRJNA211414	University of Arizona	2013-11-26	n/a	major	Contig	full	SPAdes v. 2.5.0	50.0x	Illumina GAIIx		GCA_000452925.2	GCF_000452925.1	yes	NC_000005.10	99.481	385	0	701	bacteria
NZ_AVEA02000468.1:1-351	LINE	NZ_AVEA02000468.1	L1P1_orf2	348	351	1	351	1e-116	394.9	50.6	Pseudomonas syringae CC94 contig468.1, whole genome shotgun sequence		CC94_092313_2.0	Pseudomonas syringae CC94 (g-proteobacteria)	strain=CC94	1357286	SAMN02471551	PRJNA211414	University of Arizona	2013-11-26	n/a	major	Contig	full	SPAdes v. 2.5.0	50.0x	Illumina GAIIx		GCA_000452925.2	GCF_000452925.1	yes	NC_000001.11	99.145	351	3.69e-179	632	bacteria
NZ_AVEA02000483.1:1-290	LINE	NZ_AVEA02000483.1	L1HS_5end	289	290	1	290	6.8e-102	346.7	19.7	Pseudomonas syringae CC94 contig483.1, whole genome shotgun sequence		CC94_092313_2.0	Pseudomonas syringae CC94 (g-proteobacteria)	strain=CC94	1357286	SAMN02471551	PRJNA211414	University of Arizona	2013-11-26	n/a	major	Contig	full	SPAdes v. 2.5.0	50.0x	Illumina GAIIx		GCA_000452925.2	GCF_000452925.1	yes	NC_000002.12	99.31	290	5.22e-147	525	bacteria
NZ_AVEA02000486.1:1-286	LINE	NZ_AVEA02000486.1	L1P1_orf2	284	286	1	286	6.8e-98	332.4	25.9	Pseudomonas syringae CC94 contig486.1, whole genome shotgun sequence		CC94_092313_2.0	Pseudomonas syringae CC94 (g-proteobacteria)	strain=CC94	1357286	SAMN02471551	PRJNA211414	University of Arizona	2013-11-26	n/a	major	Contig	full	SPAdes v. 2.5.0	50.0x	Illumina GAIIx		GCA_000452925.2	GCF_000452925.1	yes	NC_000001.11	99.65	286	1.85e-146	523	bacteria
NZ_AVEA02000506.1:1-224	LINE	NZ_AVEA02000506.1	L1P1_orf2	222	224	1	224	4.1e-75	256.8	13.1	Pseudomonas syringae CC94 contig506.1, whole genome shotgun sequence		CC94_092313_2.0	Pseudomonas syringae CC94 (g-proteobacteria)	strain=CC94	1357286	SAMN02471551	PRJNA211414	University of Arizona	2013-11-26	n/a	major	Contig	full	SPAdes v. 2.5.0	50.0x	Illumina GAIIx		GCA_000452925.2	GCF_000452925.1	yes	NC_000002.12	99.103	223	6.89e-110	401	bacteria
NZ_AVEI02000254.1:1-690	LINE	NZ_AVEI02000254.1	L1HS_3end	689	690	690	1	9.8e-249	833.9	33.2	Pseudomonas syringae CC1544 contig254.1, whole genome shotgun sequence	WP_032633489.1	CC1544_092313_2.0	Pseudomonas syringae CC1544 (g-proteobacteria)	strain=CC1544	1357278	SAMN02471558	PRJNA211400	University of Arizona	2013-11-27	n/a	major	Contig	full	SPAdes v. 2.5.0	50.0x	Illumina GAIIx		GCA_000452905.2	GCF_000452905.1	yes	NC_000004.12	97.391	690	0	1175	bacteria
NZ_AVEI02000284.1:1-125	Sat	NZ_AVEI02000284.1	ALR	124	326	125	1	3.1e-33	122.7	5.2	Pseudomonas syringae CC1544 contig284.1, whole genome shotgun sequence		CC1544_092313_2.0	Pseudomonas syringae CC1544 (g-proteobacteria)	strain=CC1544	1357278	SAMN02471558	PRJNA211400	University of Arizona	2013-11-27	n/a	major	Contig	full	SPAdes v. 2.5.0	50.0x	Illumina GAIIx		GCA_000452905.2	GCF_000452905.1	yes	NC_000007.14	96.8	125	2.22e-52	209	bacteria
NZ_AVEI02000284.1:126-295	Sat	NZ_AVEI02000284.1	ALR	169	326	295	126	1.2e-42	153.3	5.9	Pseudomonas syringae CC1544 contig284.1, whole genome shotgun sequence		CC1544_092313_2.0	Pseudomonas syringae CC1544 (g-proteobacteria)	strain=CC1544	1357278	SAMN02471558	PRJNA211400	University of Arizona	2013-11-27	n/a	major	Contig	full	SPAdes v. 2.5.0	50.0x	Illumina GAIIx		GCA_000452905.2	GCF_000452905.1	yes	NC_000001.11	99.408	169	1.12e-81	307	bacteria
NZ_AVEI02000286.1:1-320	LINE	NZ_AVEI02000286.1	L1P1_orf2	319	320	320	1	5.2e-117	395.9	13.5	Pseudomonas syringae CC1544 contig286.1, whole genome shotgun sequence		CC1544_092313_2.0	Pseudomonas syringae CC1544 (g-proteobacteria)	strain=CC1544	1357278	SAMN02471558	PRJNA211400	University of Arizona	2013-11-27	n/a	major	Contig	full	SPAdes v. 2.5.0	50.0x	Illumina GAIIx		GCA_000452905.2	GCF_000452905.1	yes	NC_000003.12	99.375	320	1.22e-163	580	bacteria
NZ_AVEI02000289.1:1-308	LINE	NZ_AVEI02000289.1	L1P1_orf2	304	308	1	308	2e-103	350.9	26.7	Pseudomonas syringae CC1544 contig289.1, whole genome shotgun sequence		CC1544_092313_2.0	Pseudomonas syringae CC1544 (g-proteobacteria)	strain=CC1544	1357278	SAMN02471558	PRJNA211400	University of Arizona	2013-11-27	n/a	major	Contig	full	SPAdes v. 2.5.0	50.0x	Illumina GAIIx		GCA_000452905.2	GCF_000452905.1	yes	NC_000002.12	98.046	307	3.33e-149	532	bacteria
NZ_AVEI02000296.1:1-257	LINE	NZ_AVEI02000296.1	L1P1_orf2	255	257	257	1	3.2e-84	287.1	28.7	Pseudomonas syringae CC1544 contig296.1, whole genome shotgun sequence		CC1544_092313_2.0	Pseudomonas syringae CC1544 (g-proteobacteria)	strain=CC1544	1357278	SAMN02471558	PRJNA211400	University of Arizona	2013-11-27	n/a	major	Contig	full	SPAdes v. 2.5.0	50.0x	Illumina GAIIx		GCA_000452905.2	GCF_000452905.1	yes	NC_000002.12	99.602	251	4.69e-127	459	bacteria
NZ_AVEI02000302.1:2-211	LINE	NZ_AVEI02000302.1	L1P1_orf2	208	211	2	211	5.5e-70	239.9	15.9	Pseudomonas syringae CC1544 contig302.1, whole genome shotgun sequence		CC1544_092313_2.0	Pseudomonas syringae CC1544 (g-proteobacteria)	strain=CC1544	1357278	SAMN02471558	PRJNA211400	University of Arizona	2013-11-27	n/a	major	Contig	full	SPAdes v. 2.5.0	50.0x	Illumina GAIIx		GCA_000452905.2	GCF_000452905.1	yes	NC_000002.12	100	209	1.79e-105	387	bacteria
NZ_AWXP01000039.1:1-147	HSATII	NZ_AWXP01000039.1	HSATII	147	321	147	1	1e-34	127	10.9	Proteus hauseri ZMd44 contig42, whole genome shotgun sequence	WP_071788581.1	version 3 of Proteus hauseri genome	Proteus hauseri ZMd44 (enterobacteria)	strain=ZMd44	1312367	SAMN02472132	PRJNA195421	Xiamen University	2013-11-20	n/a	major	Contig	full	De Bruijn graph v. Apr-2011	98.0x	Illumina		GCA_000497855.1	GCF_000497855.1	yes	NC_000001.11	99.32	147	1.59e-69	267	bacteria
NZ_AWXP01000039.1:180-321	HSATII	NZ_AWXP01000039.1	HSATII	145	321	321	180	5.1e-27	101.9	12.8	Proteus hauseri ZMd44 contig42, whole genome shotgun sequence	WP_071788581.1	version 3 of Proteus hauseri genome	Proteus hauseri ZMd44 (enterobacteria)	strain=ZMd44	1312367	SAMN02472132	PRJNA195421	Xiamen University	2013-11-20	n/a	major	Contig	full	De Bruijn graph v. Apr-2011	98.0x	Illumina		GCA_000497855.1	GCF_000497855.1	yes	NC_000001.11	99.296	142	9.18e-67	257	bacteria
NZ_AWXP01000048.1:1-268	LINE	NZ_AWXP01000048.1	L1P1_orf2	266	268	268	1	5.4e-87	296.5	26	Proteus hauseri ZMd44 contig60, whole genome shotgun sequence		version 3 of Proteus hauseri genome	Proteus hauseri ZMd44 (enterobacteria)	strain=ZMd44	1312367	SAMN02472132	PRJNA195421	Xiamen University	2013-11-20	n/a	major	Contig	full	De Bruijn graph v. Apr-2011	98.0x	Illumina		GCA_000497855.1	GCF_000497855.1	yes	NC_000005.10	97.761	268	3.8e-128	462	bacteria
NZ_AXUR01000142.1:363-977	LINE	NZ_AXUR01000142.1	L1P1_orf2	592	977	363	977	4.5e-125	422.8	62	Fusobacterium nucleatum W1481 Contig142, whole genome shotgun sequence		FN_W1481	Fusobacterium nucleatum W1481 (fusobacteria)	strain=W1481	1408287	SAMN02471857	PRJNA222595	University of Malaya	2013-10-28	n/a	major	Scaffold	full	CLC Genomics Workbench v. 5.1.5	2000x	Illumina HiSeq		GCA_000493815.1	GCF_000493815.1	yes	NC_000020.11	82.342	538	2e-129	468	bacteria
NZ_AZLB01000108.1:220-340	Sat	NZ_AZLB01000108.1	ALR	121	340	220	340	2.4e-22	87.2	9.8	Salmonella enterica subsp. enterica serovar Bovismorbificans str. Sal681 sal681_contig_112, whole genome shotgun sequence		sal681	Salmonella enterica subsp. enterica serovar Bovismorbificans str. Sal681 (enterobacteria)	strain=Sal681	1430433	SAMN02422697	PRJNA230004	OARSA, CFSAN	2013-12-19	n/a	major	Contig	full	CLC NGS Cell v. Oct 2013	50.0x	Illumina MiSeq		GCA_000524945.1	GCF_000524945.1	yes	NC_000009.12	99.167	120	1.27e-54	217	bacteria
NZ_AZLB01000108.1:49-219	Sat	NZ_AZLB01000108.1	ALR	170	340	49	219	1.8e-45	162.5	11.6	Salmonella enterica subsp. enterica serovar Bovismorbificans str. Sal681 sal681_contig_112, whole genome shotgun sequence		sal681	Salmonella enterica subsp. enterica serovar Bovismorbificans str. Sal681 (enterobacteria)	strain=Sal681	1430433	SAMN02422697	PRJNA230004	OARSA, CFSAN	2013-12-19	n/a	major	Contig	full	CLC NGS Cell v. Oct 2013	50.0x	Illumina MiSeq		GCA_000524945.1	GCF_000524945.1	yes	NC_000010.11	89.474	171	1.95e-54	217	bacteria
NZ_AZLB01000109.1:1-82	Sat	NZ_AZLB01000109.1	BSR	79	297	82	1	7.4e-17	69	0.3	Salmonella enterica subsp. enterica serovar Bovismorbificans str. Sal681 sal681_contig_113, whole genome shotgun sequence		sal681	Salmonella enterica subsp. enterica serovar Bovismorbificans str. Sal681 (enterobacteria)	strain=Sal681	1430433	SAMN02422697	PRJNA230004	OARSA, CFSAN	2013-12-19	n/a	major	Contig	full	CLC NGS Cell v. Oct 2013	50.0x	Illumina MiSeq		GCA_000524945.1	GCF_000524945.1	yes	NT_167219.1	88.889	81	2.84e-19	99	bacteria
NZ_AZLB01000109.1:218-297	Sat	NZ_AZLB01000109.1	BSR	78	297	297	218	1.6e-18	74.3	0.9	Salmonella enterica subsp. enterica serovar Bovismorbificans str. Sal681 sal681_contig_113, whole genome shotgun sequence		sal681	Salmonella enterica subsp. enterica serovar Bovismorbificans str. Sal681 (enterobacteria)	strain=Sal681	1430433	SAMN02422697	PRJNA230004	OARSA, CFSAN	2013-12-19	n/a	major	Contig	full	CLC NGS Cell v. Oct 2013	50.0x	Illumina MiSeq		GCA_000524945.1	GCF_000524945.1	yes	NC_000018.10	97.5	80	5.8e-31	137	bacteria
NZ_AZLB01000109.1:83-217	Sat	NZ_AZLB01000109.1	BSR	134	297	217	83	1.4e-30	113.4	0.4	Salmonella enterica subsp. enterica serovar Bovismorbificans str. Sal681 sal681_contig_113, whole genome shotgun sequence		sal681	Salmonella enterica subsp. enterica serovar Bovismorbificans str. Sal681 (enterobacteria)	strain=Sal681	1430433	SAMN02422697	PRJNA230004	OARSA, CFSAN	2013-12-19	n/a	major	Contig	full	CLC NGS Cell v. Oct 2013	50.0x	Illumina MiSeq		GCA_000524945.1	GCF_000524945.1	yes	NC_000004.12	90.37	135	6.9e-43	178	bacteria
NZ_AZTF01000027.1:1-663	LINE	NZ_AZTF01000027.1	L1HS_3end	662	663	1	663	6.5e-246	824.5	48.3	Staphylococcus aureus HST-084 contig_28, whole genome shotgun sequence	WP_031865043.1	WGS Staphylococcus aureus HST-084	Staphylococcus aureus HST-084 (firmicutes)	strain=HST-084	1324326	SAMN02952964	PRJNA215676	Lebanese American University	2014-2-6	n/a	major	Contig	full	A5 v. 20130627	192.0x	Illumina MiSeq		GCA_000564955.1	GCF_000564955.1	yes	NC_000003.12	99.095	663	0	1192	bacteria
NZ_AZYK01000132.1:1-212	LINE	NZ_AZYK01000132.1	L1P1_orf2	207	212	212	1	3.7e-30	107.9	16.7	Legionella oakridgensis RV-2-2007 LOR_RV2_contig_406.419, whole genome shotgun sequence		lor.0	Legionella oakridgensis RV-2-2007 (g-proteobacteria)	strain=RV-2-2007	1274403	SAMN02597363	PRJNA184190	Georg-August-University of Goettingen, Genomics and Applied Microbiology, Göttinger Genomics Laboratory	2014-1-3	n/a	major	Contig	full	Newbler v. 6.1	12.0x	454		GCA_000512715.1	GCF_000512715.1	yes	NC_000021.9	76.389	216	1.22e-22	111	bacteria
NZ_BACU01000424.1:1-126	Sat	NZ_BACU01000424.1	ALR	118	126	1	126	2.4e-23	87.6	4.3	Azospirillum sp. B4, whole genome shotgun sequence		ASM33327v1	Azospirillum sp. B4 (a-proteobacteria)	strain=B4	95605	SAMD00036565	PRJDA69951	Kazusa DNA Research Institute	2013-1-8	n/a	major	Scaffold	full	Paracel GenomeAssembler v. 2.6.2	3x	ABI 3730; Shimadzu DeNOVA-5500HT		GCA_000333275.1	GCF_000333275.1	yes	NC_000012.12	99.206	126	6.19e-58	228	bacteria
NZ_BACU01000432.1:1-81	LTR	NZ_BACU01000432.1	MSTB	76	81	1	81	1.2e-16	64.3	2.4	Azospirillum sp. B4, whole genome shotgun sequence		ASM33327v1	Azospirillum sp. B4 (a-proteobacteria)	strain=B4	95605	SAMD00036565	PRJDA69951	Kazusa DNA Research Institute	2013-1-8	n/a	major	Scaffold	full	Paracel GenomeAssembler v. 2.6.2	3x	ABI 3730; Shimadzu DeNOVA-5500HT		GCA_000333275.1	GCF_000333275.1	yes	NC_000006.12	100	81	7.59e-35	150	bacteria
NZ_BACU01000608.1:1-156	Alu	NZ_BACU01000608.1	AluY	159	772	1	156	6.5e-26	95.3	10.8	Azospirillum sp. B4, whole genome shotgun sequence		ASM33327v1	Azospirillum sp. B4 (a-proteobacteria)	strain=B4	95605	SAMD00036565	PRJDA69951	Kazusa DNA Research Institute	2013-1-8	n/a	major	Scaffold	full	Paracel GenomeAssembler v. 2.6.2	3x	ABI 3730; Shimadzu DeNOVA-5500HT		GCA_000333275.1	GCF_000333275.1	yes	NC_000019.10	100	156	3.66e-76	289	bacteria
NZ_BACU01000697.1:4-90	Sat	NZ_BACU01000697.1	ALR	85	90	4	90	1.4e-17	68.9	4	Azospirillum sp. B4, whole genome shotgun sequence		ASM33327v1	Azospirillum sp. B4 (a-proteobacteria)	strain=B4	95605	SAMD00036565	PRJDA69951	Kazusa DNA Research Institute	2013-1-8	n/a	major	Scaffold	full	Paracel GenomeAssembler v. 2.6.2	3x	ABI 3730; Shimadzu DeNOVA-5500HT		GCA_000333275.1	GCF_000333275.1	yes	NC_000001.11	100	87	3.9e-38	161	bacteria
NZ_BACV01000592.1:1-71	Alu	NZ_BACV01000592.1	AluSg	69	111	71	1	7.3e-15	61.8	2.2	Cytophagales bacterium B6, whole genome shotgun sequence		ASM33329v1	Cytophagales bacterium B6 (CFB group bacteria)	strain=B6	100480	SAMD00036566	PRJDA69953	Kazusa DNA Research Institute	2013-1-8	n/a	major	Scaffold	full	Paracel GenomeAssembler v. 2.6.2	3x	ABI 3730; Shimadzu DeNOVA-5500HT		GCA_000333295.1	GCF_000333295.1	yes	NC_000013.11	100	71	2.24e-29	132	bacteria
NZ_BACV01001116.1:187-514	Alu	NZ_BACV01001116.1	AluSz	305	1242	514	187	8.4e-91	311.3	5.5	Cytophagales bacterium B6, whole genome shotgun sequence		ASM33329v1	Cytophagales bacterium B6 (CFB group bacteria)	strain=B6	100480	SAMD00036566	PRJDA69953	Kazusa DNA Research Institute	2013-1-8	n/a	major	Scaffold	full	Paracel GenomeAssembler v. 2.6.2	3x	ABI 3730; Shimadzu DeNOVA-5500HT		GCA_000333295.1	GCF_000333295.1	yes	NC_000004.12	99.085	328	2.09e-166	590	bacteria
NZ_BACZ01000234.1:1-232	LINE	NZ_BACZ01000234.1	L1P1_orf2	226	232	1	232	1.4e-57	198.8	21.8	Curtobacterium sp. B18, whole genome shotgun sequence		ASM33337v1	Curtobacterium sp. B18 (high GC Gram+)	strain=B18	95614	SAMD00036570	PRJDA69961	Kazusa DNA Research Institute	2013-1-8	n/a	major	Scaffold	full	Paracel GenomeAssembler v. 2.6.2	3x	ABI 3730; Shimadzu DeNOVA-5500HT		GCA_000333375.1	GCF_000333375.1	yes	NC_000012.12	100	227	1.98e-115	420	bacteria
NZ_BADD01000419.1:1-99	Sat	NZ_BADD01000419.1	ALR	97	99	99	1	5.8e-16	66.5	2.8	Rhodopseudomonas sp. B29, whole genome shotgun sequence		ASM33345v1	Rhodopseudomonas sp. B29 (a-proteobacteria)	strain=B29	95607	SAMD00036574	PRJDA69969	Kazusa DNA Research Institute	2013-1-10	n/a	major	Scaffold	full	Paracel GenomeAssembler v. 2.6.2	3x	ABI 3730; Shimadzu DeNOVA-5500HT		GCA_000333455.1	GCF_000333455.1	yes	NC_000018.10	100	99	9.98e-45	183	bacteria
NZ_BADL01000473.1:1-112	Alu	NZ_BADL01000473.1	AluY	110	112	1	112	1.4e-31	116.9	4.5	Ideonella sp. B508-1, whole genome shotgun sequence		ASM33361v1	Ideonella sp. B508-1 (b-proteobacteria)	strain=B508-1	137716	SAMD00036582	PRJDA69985	Kazusa DNA Research Institute	2013-1-10	n/a	major	Contig	full	Paracel GenomeAssembler v. 2.6.2	3x	ABI 3730; Shimadzu DeNOVA-5500HT		GCA_000333615.1	GCF_000333615.1	yes	NC_000017.11	100	112	6.99e-52	207	bacteria
NZ_BAFU01000107.1:1-114	Sat	NZ_BAFU01000107.1	ALR	112	152	1	114	1.5e-23	91.2	6.2	Nocardia brevicatena NBRC 12119, whole genome shotgun sequence		ASM30849v1	Nocardia brevicatena NBRC 12119 (high GC Gram+)	strain=NBRC 12119	1206725	SAMD00041812	PRJDB121	National Institute of Technology and Evaluation	2012-7-13	n/a	major	Contig	full	Newbler v. 2.6	80x	454 GS-FLX Titanium; Illumina HiSeq 1000	Representative Genome	GCA_000308495.1	GCF_000308495.1	yes	NC_000001.11	100	114	5.53e-53	211	bacteria
NZ_BAFU01000110.1:1-156	LINE	NZ_BAFU01000110.1	L1HS_3end	155	157	1	156	3.8e-39	140.3	5.7	Nocardia brevicatena NBRC 12119, whole genome shotgun sequence		ASM30849v1	Nocardia brevicatena NBRC 12119 (high GC Gram+)	strain=NBRC 12119	1206725	SAMD00041812	PRJDB121	National Institute of Technology and Evaluation	2012-7-13	n/a	major	Contig	full	Newbler v. 2.6	80x	454 GS-FLX Titanium; Illumina HiSeq 1000	Representative Genome	GCA_000308495.1	GCF_000308495.1	yes	NC_000001.11	96.815	157	7.97e-68	261	bacteria
NZ_BAFU01000111.1:1-121	Sat	NZ_BAFU01000111.1	ALR	119	158	1	121	9.8e-30	111.4	3.7	Nocardia brevicatena NBRC 12119, whole genome shotgun sequence		ASM30849v1	Nocardia brevicatena NBRC 12119 (high GC Gram+)	strain=NBRC 12119	1206725	SAMD00041812	PRJDB121	National Institute of Technology and Evaluation	2012-7-13	n/a	major	Contig	full	Newbler v. 2.6	80x	454 GS-FLX Titanium; Illumina HiSeq 1000	Representative Genome	GCA_000308495.1	GCF_000308495.1	yes	NC_000002.12	96.721	122	3.56e-50	202	bacteria
NZ_BAFU01000112.1:1-170	HSATII	NZ_BAFU01000112.1	HSATII	155	172	1	170	1.4e-13	58	37	Nocardia brevicatena NBRC 12119, whole genome shotgun sequence		ASM30849v1	Nocardia brevicatena NBRC 12119 (high GC Gram+)	strain=NBRC 12119	1206725	SAMD00041812	PRJDB121	National Institute of Technology and Evaluation	2012-7-13	n/a	major	Contig	full	Newbler v. 2.6	80x	454 GS-FLX Titanium; Illumina HiSeq 1000	Representative Genome	GCA_000308495.1	GCF_000308495.1	yes	NT_187384.1	94.578	166	1.48e-65	254	bacteria
NZ_BAFU01000113.1:1-175	LINE	NZ_BAFU01000113.1	L1P1_orf2	172	175	175	1	6.1e-49	170.1	17.6	Nocardia brevicatena NBRC 12119, whole genome shotgun sequence		ASM30849v1	Nocardia brevicatena NBRC 12119 (high GC Gram+)	strain=NBRC 12119	1206725	SAMD00041812	PRJDB121	National Institute of Technology and Evaluation	2012-7-13	n/a	major	Contig	full	Newbler v. 2.6	80x	454 GS-FLX Titanium; Illumina HiSeq 1000	Representative Genome	GCA_000308495.1	GCF_000308495.1	yes	NC_000001.11	97.143	175	9.02e-78	294	bacteria
NZ_BAFU01000114.1:1-185	LINE	NZ_BAFU01000114.1	L1P1_orf2	184	185	185	1	1.2e-49	172.5	36.5	Nocardia brevicatena NBRC 12119, whole genome shotgun sequence		ASM30849v1	Nocardia brevicatena NBRC 12119 (high GC Gram+)	strain=NBRC 12119	1206725	SAMD00041812	PRJDB121	National Institute of Technology and Evaluation	2012-7-13	n/a	major	Contig	full	Newbler v. 2.6	80x	454 GS-FLX Titanium; Illumina HiSeq 1000	Representative Genome	GCA_000308495.1	GCF_000308495.1	yes	NC_000002.12	97.849	186	1.59e-85	320	bacteria
NZ_BAFU01000115.1:1-188	HSATII	NZ_BAFU01000115.1	HSATII	158	188	188	1	6.6e-13	55.8	18.1	Nocardia brevicatena NBRC 12119, whole genome shotgun sequence		ASM30849v1	Nocardia brevicatena NBRC 12119 (high GC Gram+)	strain=NBRC 12119	1206725	SAMD00041812	PRJDB121	National Institute of Technology and Evaluation	2012-7-13	n/a	major	Contig	full	Newbler v. 2.6	80x	454 GS-FLX Titanium; Illumina HiSeq 1000	Representative Genome	GCA_000308495.1	GCF_000308495.1	yes	NC_000024.10	98.936	188	1.61e-90	337	bacteria
NZ_BAFU01000116.1:1-191	LINE	NZ_BAFU01000116.1	L1P1_orf2	185	191	191	1	5.7e-54	186.8	26.5	Nocardia brevicatena NBRC 12119, whole genome shotgun sequence		ASM30849v1	Nocardia brevicatena NBRC 12119 (high GC Gram+)	strain=NBRC 12119	1206725	SAMD00041812	PRJDB121	National Institute of Technology and Evaluation	2012-7-13	n/a	major	Contig	full	Newbler v. 2.6	80x	454 GS-FLX Titanium; Illumina HiSeq 1000	Representative Genome	GCA_000308495.1	GCF_000308495.1	yes	NC_000021.9	97.906	191	2.74e-88	329	bacteria
NZ_BAFU01000117.1:47-192	HSATII	NZ_BAFU01000117.1	HSATII	145	192	192	47	2.1e-30	112.8	15.6	Nocardia brevicatena NBRC 12119, whole genome shotgun sequence		ASM30849v1	Nocardia brevicatena NBRC 12119 (high GC Gram+)	strain=NBRC 12119	1206725	SAMD00041812	PRJDB121	National Institute of Technology and Evaluation	2012-7-13	n/a	major	Contig	full	Newbler v. 2.6	80x	454 GS-FLX Titanium; Illumina HiSeq 1000	Representative Genome	GCA_000308495.1	GCF_000308495.1	yes	NC_000001.11	99.32	147	5.68e-69	265	bacteria
NZ_BAFU01000121.1:1-206	LINE	NZ_BAFU01000121.1	L1HS_5end	205	206	1	206	1.6e-64	222.9	18.3	Nocardia brevicatena NBRC 12119, whole genome shotgun sequence		ASM30849v1	Nocardia brevicatena NBRC 12119 (high GC Gram+)	strain=NBRC 12119	1206725	SAMD00041812	PRJDB121	National Institute of Technology and Evaluation	2012-7-13	n/a	major	Contig	full	Newbler v. 2.6	80x	454 GS-FLX Titanium; Illumina HiSeq 1000	Representative Genome	GCA_000308495.1	GCF_000308495.1	yes	NC_000005.10	99.029	206	1.76e-100	370	bacteria
NZ_BAFU01000122.1:1-208	LINE	NZ_BAFU01000122.1	L1P1_orf2	206	208	1	208	1.2e-64	222.3	30.6	Nocardia brevicatena NBRC 12119, whole genome shotgun sequence		ASM30849v1	Nocardia brevicatena NBRC 12119 (high GC Gram+)	strain=NBRC 12119	1206725	SAMD00041812	PRJDB121	National Institute of Technology and Evaluation	2012-7-13	n/a	major	Contig	full	Newbler v. 2.6	80x	454 GS-FLX Titanium; Illumina HiSeq 1000	Representative Genome	GCA_000308495.1	GCF_000308495.1	yes	NC_000001.11	98.558	208	6.42e-100	368	bacteria
NZ_BAFU01000129.1:121-268	HSATII	NZ_BAFU01000129.1	HSATII	150	268	121	268	5.4e-36	131	11.9	Nocardia brevicatena NBRC 12119, whole genome shotgun sequence		ASM30849v1	Nocardia brevicatena NBRC 12119 (high GC Gram+)	strain=NBRC 12119	1206725	SAMD00041812	PRJDB121	National Institute of Technology and Evaluation	2012-7-13	n/a	major	Contig	full	Newbler v. 2.6	80x	454 GS-FLX Titanium; Illumina HiSeq 1000	Representative Genome	GCA_000308495.1	GCF_000308495.1	yes	NC_000001.11	99.324	148	4.46e-70	268	bacteria
NZ_BAFU01000131.1:1-287	LINE	NZ_BAFU01000131.1	L1P1_orf2	286	287	1	287	1.1e-98	335.2	19.4	Nocardia brevicatena NBRC 12119, whole genome shotgun sequence		ASM30849v1	Nocardia brevicatena NBRC 12119 (high GC Gram+)	strain=NBRC 12119	1206725	SAMD00041812	PRJDB121	National Institute of Technology and Evaluation	2012-7-13	n/a	major	Contig	full	Newbler v. 2.6	80x	454 GS-FLX Titanium; Illumina HiSeq 1000	Representative Genome	GCA_000308495.1	GCF_000308495.1	yes	NC_000005.10	98.258	287	2.42e-140	503	bacteria
NZ_BAFU01000133.1:1-241	Alu	NZ_BAFU01000133.1	AluSg	241	300	1	241	2.4e-70	244.1	12.3	Nocardia brevicatena NBRC 12119, whole genome shotgun sequence		ASM30849v1	Nocardia brevicatena NBRC 12119 (high GC Gram+)	strain=NBRC 12119	1206725	SAMD00041812	PRJDB121	National Institute of Technology and Evaluation	2012-7-13	n/a	major	Contig	full	Newbler v. 2.6	80x	454 GS-FLX Titanium; Illumina HiSeq 1000	Representative Genome	GCA_000308495.1	GCF_000308495.1	yes	NC_000003.12	93.254	252	1.26e-97	361	bacteria
NZ_BAFU01000135.1:1-119	Sat	NZ_BAFU01000135.1	ALR	120	324	1	119	5.9e-24	92.5	4.4	Nocardia brevicatena NBRC 12119, whole genome shotgun sequence		ASM30849v1	Nocardia brevicatena NBRC 12119 (high GC Gram+)	strain=NBRC 12119	1206725	SAMD00041812	PRJDB121	National Institute of Technology and Evaluation	2012-7-13	n/a	major	Contig	full	Newbler v. 2.6	80x	454 GS-FLX Titanium; Illumina HiSeq 1000	Representative Genome	GCA_000308495.1	GCF_000308495.1	yes	NC_000001.11	97.479	119	9.68e-51	204	bacteria
NZ_BAFU01000135.1:121-286	Sat	NZ_BAFU01000135.1	ALR	169	324	121	286	3.8e-37	135.5	5.7	Nocardia brevicatena NBRC 12119, whole genome shotgun sequence		ASM30849v1	Nocardia brevicatena NBRC 12119 (high GC Gram+)	strain=NBRC 12119	1206725	SAMD00041812	PRJDB121	National Institute of Technology and Evaluation	2012-7-13	n/a	major	Contig	full	Newbler v. 2.6	80x	454 GS-FLX Titanium; Illumina HiSeq 1000	Representative Genome	GCA_000308495.1	GCF_000308495.1	yes	NC_000002.12	90.184	163	2.44e-53	213	bacteria
NZ_BAFU01000138.1:1-364	LINE	NZ_BAFU01000138.1	L1P1_orf2	362	364	1	364	1.2e-129	438	23.2	Nocardia brevicatena NBRC 12119, whole genome shotgun sequence		ASM30849v1	Nocardia brevicatena NBRC 12119 (high GC Gram+)	strain=NBRC 12119	1206725	SAMD00041812	PRJDB121	National Institute of Technology and Evaluation	2012-7-13	n/a	major	Contig	full	Newbler v. 2.6	80x	454 GS-FLX Titanium; Illumina HiSeq 1000	Representative Genome	GCA_000308495.1	GCF_000308495.1	yes	NC_000005.10	98.352	364	0	640	bacteria
NZ_BAFU01000139.1:1-142	HSATII	NZ_BAFU01000139.1	HSATII	147	374	1	142	2.1e-33	122.6	11.5	Nocardia brevicatena NBRC 12119, whole genome shotgun sequence		ASM30849v1	Nocardia brevicatena NBRC 12119 (high GC Gram+)	strain=NBRC 12119	1206725	SAMD00041812	PRJDB121	National Institute of Technology and Evaluation	2012-7-13	n/a	major	Contig	full	Newbler v. 2.6	80x	454 GS-FLX Titanium; Illumina HiSeq 1000	Representative Genome	GCA_000308495.1	GCF_000308495.1	yes	NC_000001.11	99.296	142	9.18e-67	257	bacteria
NZ_BAFU01000139.1:146-312	HSATII	NZ_BAFU01000139.1	HSATII	167	374	146	312	5e-40	144.2	14.3	Nocardia brevicatena NBRC 12119, whole genome shotgun sequence		ASM30849v1	Nocardia brevicatena NBRC 12119 (high GC Gram+)	strain=NBRC 12119	1206725	SAMD00041812	PRJDB121	National Institute of Technology and Evaluation	2012-7-13	n/a	major	Contig	full	Newbler v. 2.6	80x	454 GS-FLX Titanium; Illumina HiSeq 1000	Representative Genome	GCA_000308495.1	GCF_000308495.1	yes	NC_000001.11	100	167	3.05e-82	309	bacteria
NZ_BAFU01000140.1:82-252	HSATII	NZ_BAFU01000140.1	HSATII	160	382	252	82	9e-38	136.8	13.1	Nocardia brevicatena NBRC 12119, whole genome shotgun sequence	WP_040839527.1	ASM30849v1	Nocardia brevicatena NBRC 12119 (high GC Gram+)	strain=NBRC 12119	1206725	SAMD00041812	PRJDB121	National Institute of Technology and Evaluation	2012-7-13	n/a	major	Contig	full	Newbler v. 2.6	80x	454 GS-FLX Titanium; Illumina HiSeq 1000	Representative Genome	GCA_000308495.1	GCF_000308495.1	yes	NC_000001.11	99.415	171	8.71e-83	311	bacteria
NZ_BAFU01000141.1:1-385	LINE	NZ_BAFU01000141.1	L1HS_3end	385	385	1	385	1.1e-133	453.2	27.1	Nocardia brevicatena NBRC 12119, whole genome shotgun sequence		ASM30849v1	Nocardia brevicatena NBRC 12119 (high GC Gram+)	strain=NBRC 12119	1206725	SAMD00041812	PRJDB121	National Institute of Technology and Evaluation	2012-7-13	n/a	major	Contig	full	Newbler v. 2.6	80x	454 GS-FLX Titanium; Illumina HiSeq 1000	Representative Genome	GCA_000308495.1	GCF_000308495.1	yes	NC_000001.11	98.708	387	0	686	bacteria
NZ_BAFU01000147.1:223-432	HSATII	NZ_BAFU01000147.1	HSATII	161	449	432	223	4.7e-17	69.4	18.1	Nocardia brevicatena NBRC 12119, whole genome shotgun sequence		ASM30849v1	Nocardia brevicatena NBRC 12119 (high GC Gram+)	strain=NBRC 12119	1206725	SAMD00041812	PRJDB121	National Institute of Technology and Evaluation	2012-7-13	n/a	major	Contig	full	Newbler v. 2.6	80x	454 GS-FLX Titanium; Illumina HiSeq 1000	Representative Genome	GCA_000308495.1	GCF_000308495.1	yes	NC_000024.10	94.581	203	3.08e-83	313	bacteria
NZ_BBKD01000412.1:197-971	LINE	NZ_BBKD01000412.1	L1HS_3end	732	1023	197	971	5.7e-262	877.7	37.1	Enterobacter sp. KINAN-G, whole genome shotgun sequence		ASM289707v1	Enterobacter sp. KINAN-G (enterobacteria)	strain=KINAN-G	1535203	SAMD00019157	PRJDB3049	Laboratory of Bacterial Genomics, Pathogen Genomic Center, National Institute of Infectious Diseases	2017-12-20	n/a	major	Contig	full	CLC De Novo Assembler v. 7.0.4	200x	GAIIx, MiSeq		GCA_002897075.1	GCF_002897075.1	yes	NC_000023.11	97.286	737	0	1243	bacteria
NZ_BBUQ01000165.1:1-150	LINE	NZ_BBUQ01000165.1	L1MC4_3end	168	150	150	1	1.2e-23	86.3	12.8	Enterobacter cloacae strain MRY13-0312, whole genome shotgun sequence		ASM95389v1	Enterobacter cloacae (enterobacteria)	strain=MRY13-0312	550	SAMD00026326	PRJDB3530	National Institute of Infectious Diseases	2015-3-3	n/a	major	Contig	full	CLC Genomic Workbench v. 7.5.1	183.7x	Illumina HiSeq 2500		GCA_000953895.1	GCF_000953895.1	yes	NC_000004.12	100	150	7.54e-73	278	bacteria
NZ_BBUQ01000171.1:1-150	HSATII	NZ_BBUQ01000171.1	HSATII	151	150	150	1	1.5e-25	96.9	13.8	Enterobacter cloacae strain MRY13-0312, whole genome shotgun sequence		ASM95389v1	Enterobacter cloacae (enterobacteria)	strain=MRY13-0312	550	SAMD00026326	PRJDB3530	National Institute of Infectious Diseases	2015-3-3	n/a	major	Contig	full	CLC Genomic Workbench v. 7.5.1	183.7x	Illumina HiSeq 2500		GCA_000953895.1	GCF_000953895.1	yes	NC_000001.11	92	150	7.76e-53	211	bacteria
NZ_BBUQ01000172.1:1-150	HSATII	NZ_BBUQ01000172.1	HSATII	139	150	150	1	3.5e-28	105.5	13.8	Enterobacter cloacae strain MRY13-0312, whole genome shotgun sequence		ASM95389v1	Enterobacter cloacae (enterobacteria)	strain=MRY13-0312	550	SAMD00026326	PRJDB3530	National Institute of Infectious Diseases	2015-3-3	n/a	major	Contig	full	CLC Genomic Workbench v. 7.5.1	183.7x	Illumina HiSeq 2500		GCA_000953895.1	GCF_000953895.1	yes	NT_187364.1	98.639	147	7.59e-68	261	bacteria
NZ_BCMN01000064.1:1840-2159	Alu	NZ_BCMN01000064.1	AluSg	286	2547	2159	1840	9.9e-67	232.2	5.7	Streptomyces turgidiscabies strain T45, whole genome shotgun sequence		ASM148514v1	Streptomyces turgidiscabies (high GC Gram+)	strain=T45	85558	SAMD00034891	PRJDB4008	Plant Pathology and Entomology, Kagoshima Institute for Agricultural Development	2015-12-23	n/a	major	Scaffold	full	SPAdes v. 3.5.0	249x	MiSeq		GCA_001485145.1	GCF_001485145.1	yes	NW_009646209.1	94.603	315	2.75e-135	486	bacteria
NZ_BCMN01000073.1:1034-1201	HSATII	NZ_BCMN01000073.1	HSATII	159	1434	1201	1034	9.9e-41	146.5	12.3	Streptomyces turgidiscabies strain T45, whole genome shotgun sequence		ASM148514v1	Streptomyces turgidiscabies (high GC Gram+)	strain=T45	85558	SAMD00034891	PRJDB4008	Plant Pathology and Entomology, Kagoshima Institute for Agricultural Development	2015-12-23	n/a	major	Scaffold	full	SPAdes v. 3.5.0	249x	MiSeq		GCA_001485145.1	GCF_001485145.1	yes	NC_000001.11	97.093	172	5.17e-75	285	bacteria
NZ_BCMN01000073.1:1-172	HSATII	NZ_BCMN01000073.1	HSATII	168	1434	172	1	1.9e-39	142.3	17.8	Streptomyces turgidiscabies strain T45, whole genome shotgun sequence		ASM148514v1	Streptomyces turgidiscabies (high GC Gram+)	strain=T45	85558	SAMD00034891	PRJDB4008	Plant Pathology and Entomology, Kagoshima Institute for Agricultural Development	2015-12-23	n/a	major	Scaffold	full	SPAdes v. 3.5.0	249x	MiSeq		GCA_001485145.1	GCF_001485145.1	yes	NC_000001.11	100	172	5.24e-85	318	bacteria
NZ_BCMN01000073.1:1307-1434	HSATII	NZ_BCMN01000073.1	HSATII	126	1434	1434	1307	2.8e-34	125.5	13.4	Streptomyces turgidiscabies strain T45, whole genome shotgun sequence		ASM148514v1	Streptomyces turgidiscabies (high GC Gram+)	strain=T45	85558	SAMD00034891	PRJDB4008	Plant Pathology and Entomology, Kagoshima Institute for Agricultural Development	2015-12-23	n/a	major	Scaffold	full	SPAdes v. 3.5.0	249x	MiSeq		GCA_001485145.1	GCF_001485145.1	yes	NC_000001.11	92.188	128	4.99e-44	182	bacteria
NZ_BCMN01000073.1:173-339	HSATII	NZ_BCMN01000073.1	HSATII	167	1434	339	173	2.4e-40	145.2	14.3	Streptomyces turgidiscabies strain T45, whole genome shotgun sequence		ASM148514v1	Streptomyces turgidiscabies (high GC Gram+)	strain=T45	85558	SAMD00034891	PRJDB4008	Plant Pathology and Entomology, Kagoshima Institute for Agricultural Development	2015-12-23	n/a	major	Scaffold	full	SPAdes v. 3.5.0	249x	MiSeq		GCA_001485145.1	GCF_001485145.1	yes	NC_000001.11	100	167	3.05e-82	309	bacteria
NZ_BCMN01000073.1:438-603	HSATII	NZ_BCMN01000073.1	HSATII	165	1434	603	438	9.2e-39	140.1	16	Streptomyces turgidiscabies strain T45, whole genome shotgun sequence		ASM148514v1	Streptomyces turgidiscabies (high GC Gram+)	strain=T45	85558	SAMD00034891	PRJDB4008	Plant Pathology and Entomology, Kagoshima Institute for Agricultural Development	2015-12-23	n/a	major	Scaffold	full	SPAdes v. 3.5.0	249x	MiSeq		GCA_001485145.1	GCF_001485145.1	yes	NC_000001.11	100	166	1.09e-81	307	bacteria
NZ_BCMN01000073.1:741-908	HSATII	NZ_BCMN01000073.1	HSATII	168	1434	908	741	3.4e-41	148	14.3	Streptomyces turgidiscabies strain T45, whole genome shotgun sequence		ASM148514v1	Streptomyces turgidiscabies (high GC Gram+)	strain=T45	85558	SAMD00034891	PRJDB4008	Plant Pathology and Entomology, Kagoshima Institute for Agricultural Development	2015-12-23	n/a	major	Scaffold	full	SPAdes v. 3.5.0	249x	MiSeq		GCA_001485145.1	GCF_001485145.1	yes	NC_000001.11	99.405	168	3.97e-81	305	bacteria
NZ_BCMN01000076.1:1-111	Sat	NZ_BCMN01000076.1	ALR	110	1283	111	1	8e-29	108.4	8.5	Streptomyces turgidiscabies strain T45, whole genome shotgun sequence		ASM148514v1	Streptomyces turgidiscabies (high GC Gram+)	strain=T45	85558	SAMD00034891	PRJDB4008	Plant Pathology and Entomology, Kagoshima Institute for Agricultural Development	2015-12-23	n/a	major	Scaffold	full	SPAdes v. 3.5.0	249x	MiSeq		GCA_001485145.1	GCF_001485145.1	yes	NC_000002.12	100	111	2.49e-51	206	bacteria
NZ_BCMN01000076.1:112-282	Sat	NZ_BCMN01000076.1	ALR	170	1283	282	112	4.5e-50	177.6	5.9	Streptomyces turgidiscabies strain T45, whole genome shotgun sequence		ASM148514v1	Streptomyces turgidiscabies (high GC Gram+)	strain=T45	85558	SAMD00034891	PRJDB4008	Plant Pathology and Entomology, Kagoshima Institute for Agricultural Development	2015-12-23	n/a	major	Scaffold	full	SPAdes v. 3.5.0	249x	MiSeq		GCA_001485145.1	GCF_001485145.1	yes	NC_000002.12	99.415	171	8.71e-83	311	bacteria
NZ_BCMN01000076.1:1130-1282	Sat	NZ_BCMN01000076.1	ALR	149	1283	1282	1130	2.2e-38	139.5	4.2	Streptomyces turgidiscabies strain T45, whole genome shotgun sequence		ASM148514v1	Streptomyces turgidiscabies (high GC Gram+)	strain=T45	85558	SAMD00034891	PRJDB4008	Plant Pathology and Entomology, Kagoshima Institute for Agricultural Development	2015-12-23	n/a	major	Scaffold	full	SPAdes v. 3.5.0	249x	MiSeq		GCA_001485145.1	GCF_001485145.1	yes	NC_000020.11	100	150	7.73e-73	278	bacteria
NZ_BCMN01000076.1:283-449	Sat	NZ_BCMN01000076.1	ALR	170	1283	449	283	2.7e-33	123	5.6	Streptomyces turgidiscabies strain T45, whole genome shotgun sequence		ASM148514v1	Streptomyces turgidiscabies (high GC Gram+)	strain=T45	85558	SAMD00034891	PRJDB4008	Plant Pathology and Entomology, Kagoshima Institute for Agricultural Development	2015-12-23	n/a	major	Scaffold	full	SPAdes v. 3.5.0	249x	MiSeq		GCA_001485145.1	GCF_001485145.1	yes	NC_000020.11	100	167	3.05e-82	309	bacteria
NZ_BCMN01000076.1:450-620	Sat	NZ_BCMN01000076.1	ALR	170	1283	620	450	3.1e-41	148.9	4	Streptomyces turgidiscabies strain T45, whole genome shotgun sequence		ASM148514v1	Streptomyces turgidiscabies (high GC Gram+)	strain=T45	85558	SAMD00034891	PRJDB4008	Plant Pathology and Entomology, Kagoshima Institute for Agricultural Development	2015-12-23	n/a	major	Scaffold	full	SPAdes v. 3.5.0	249x	MiSeq		GCA_001485145.1	GCF_001485145.1	yes	NC_000020.11	100	171	1.87e-84	316	bacteria
NZ_BCMN01000076.1:621-787	Sat	NZ_BCMN01000076.1	ALR	169	1283	787	621	8.3e-33	121.4	7.7	Streptomyces turgidiscabies strain T45, whole genome shotgun sequence		ASM148514v1	Streptomyces turgidiscabies (high GC Gram+)	strain=T45	85558	SAMD00034891	PRJDB4008	Plant Pathology and Entomology, Kagoshima Institute for Agricultural Development	2015-12-23	n/a	major	Scaffold	full	SPAdes v. 3.5.0	249x	MiSeq		GCA_001485145.1	GCF_001485145.1	yes	NC_000020.11	100	167	3.05e-82	309	bacteria
NZ_BCMN01000076.1:788-958	Sat	NZ_BCMN01000076.1	ALR	170	1283	958	788	2e-36	133.1	3.6	Streptomyces turgidiscabies strain T45, whole genome shotgun sequence		ASM148514v1	Streptomyces turgidiscabies (high GC Gram+)	strain=T45	85558	SAMD00034891	PRJDB4008	Plant Pathology and Entomology, Kagoshima Institute for Agricultural Development	2015-12-23	n/a	major	Scaffold	full	SPAdes v. 3.5.0	249x	MiSeq		GCA_001485145.1	GCF_001485145.1	yes	NC_000020.11	100	171	1.87e-84	316	bacteria
NZ_BCMN01000076.1:959-1129	Sat	NZ_BCMN01000076.1	ALR	170	1283	1129	959	4.3e-44	158.1	9.5	Streptomyces turgidiscabies strain T45, whole genome shotgun sequence		ASM148514v1	Streptomyces turgidiscabies (high GC Gram+)	strain=T45	85558	SAMD00034891	PRJDB4008	Plant Pathology and Entomology, Kagoshima Institute for Agricultural Development	2015-12-23	n/a	major	Scaffold	full	SPAdes v. 3.5.0	249x	MiSeq		GCA_001485145.1	GCF_001485145.1	yes	NC_000020.11	100	171	1.87e-84	316	bacteria
NZ_BCMN01000080.1:1-110	Sat	NZ_BCMN01000080.1	ALR	109	1149	110	1	2e-25	97.3	4.4	Streptomyces turgidiscabies strain T45, whole genome shotgun sequence		ASM148514v1	Streptomyces turgidiscabies (high GC Gram+)	strain=T45	85558	SAMD00034891	PRJDB4008	Plant Pathology and Entomology, Kagoshima Institute for Agricultural Development	2015-12-23	n/a	major	Scaffold	full	SPAdes v. 3.5.0	249x	MiSeq		GCA_001485145.1	GCF_001485145.1	yes	NC_000007.14	100	110	8.83e-51	204	bacteria
NZ_BCMN01000080.1:112-280	Sat	NZ_BCMN01000080.1	ALR	170	1149	280	112	2.6e-40	145.8	6.6	Streptomyces turgidiscabies strain T45, whole genome shotgun sequence		ASM148514v1	Streptomyces turgidiscabies (high GC Gram+)	strain=T45	85558	SAMD00034891	PRJDB4008	Plant Pathology and Entomology, Kagoshima Institute for Agricultural Development	2015-12-23	n/a	major	Scaffold	full	SPAdes v. 3.5.0	249x	MiSeq		GCA_001485145.1	GCF_001485145.1	yes	NC_000007.14	100	169	2.39e-83	313	bacteria
NZ_BCMN01000080.1:282-450	Sat	NZ_BCMN01000080.1	ALR	168	1149	450	282	1.5e-40	146.6	7	Streptomyces turgidiscabies strain T45, whole genome shotgun sequence		ASM148514v1	Streptomyces turgidiscabies (high GC Gram+)	strain=T45	85558	SAMD00034891	PRJDB4008	Plant Pathology and Entomology, Kagoshima Institute for Agricultural Development	2015-12-23	n/a	major	Scaffold	full	SPAdes v. 3.5.0	249x	MiSeq		GCA_001485145.1	GCF_001485145.1	yes	NC_000007.14	100	169	2.39e-83	313	bacteria
NZ_BCMN01000080.1:452-620	Sat	NZ_BCMN01000080.1	ALR	170	1149	620	452	1.5e-38	140.1	6.5	Streptomyces turgidiscabies strain T45, whole genome shotgun sequence		ASM148514v1	Streptomyces turgidiscabies (high GC Gram+)	strain=T45	85558	SAMD00034891	PRJDB4008	Plant Pathology and Entomology, Kagoshima Institute for Agricultural Development	2015-12-23	n/a	major	Scaffold	full	SPAdes v. 3.5.0	249x	MiSeq		GCA_001485145.1	GCF_001485145.1	yes	NC_000007.14	100	169	2.39e-83	313	bacteria
NZ_BCMN01000080.1:622-790	Sat	NZ_BCMN01000080.1	ALR	167	1149	790	622	2.9e-37	135.9	8.2	Streptomyces turgidiscabies strain T45, whole genome shotgun sequence		ASM148514v1	Streptomyces turgidiscabies (high GC Gram+)	strain=T45	85558	SAMD00034891	PRJDB4008	Plant Pathology and Entomology, Kagoshima Institute for Agricultural Development	2015-12-23	n/a	major	Scaffold	full	SPAdes v. 3.5.0	249x	MiSeq		GCA_001485145.1	GCF_001485145.1	yes	NC_000007.14	100	169	2.39e-83	313	bacteria
NZ_BCMN01000080.1:792-962	Sat	NZ_BCMN01000080.1	ALR	165	1149	962	792	7.4e-36	131.3	7.6	Streptomyces turgidiscabies strain T45, whole genome shotgun sequence		ASM148514v1	Streptomyces turgidiscabies (high GC Gram+)	strain=T45	85558	SAMD00034891	PRJDB4008	Plant Pathology and Entomology, Kagoshima Institute for Agricultural Development	2015-12-23	n/a	major	Scaffold	full	SPAdes v. 3.5.0	249x	MiSeq		GCA_001485145.1	GCF_001485145.1	yes	NC_000007.14	100	171	1.87e-84	316	bacteria
NZ_BCMN01000080.1:964-1132	Sat	NZ_BCMN01000080.1	ALR	168	1149	1132	964	3e-42	152.2	7.7	Streptomyces turgidiscabies strain T45, whole genome shotgun sequence		ASM148514v1	Streptomyces turgidiscabies (high GC Gram+)	strain=T45	85558	SAMD00034891	PRJDB4008	Plant Pathology and Entomology, Kagoshima Institute for Agricultural Development	2015-12-23	n/a	major	Scaffold	full	SPAdes v. 3.5.0	249x	MiSeq		GCA_001485145.1	GCF_001485145.1	yes	NC_000007.14	100	169	2.39e-83	313	bacteria
NZ_BCMN01000082.1:1-128	Sat	NZ_BCMN01000082.1	ALR	127	977	1	128	1e-30	114.5	2.9	Streptomyces turgidiscabies strain T45, whole genome shotgun sequence		ASM148514v1	Streptomyces turgidiscabies (high GC Gram+)	strain=T45	85558	SAMD00034891	PRJDB4008	Plant Pathology and Entomology, Kagoshima Institute for Agricultural Development	2015-12-23	n/a	major	Scaffold	full	SPAdes v. 3.5.0	249x	MiSeq		GCA_001485145.1	GCF_001485145.1	yes	NC_000011.10	100	128	1.05e-60	237	bacteria
NZ_BCMN01000082.1:129-299	Sat	NZ_BCMN01000082.1	ALR	170	977	129	299	1.1e-42	153.5	8	Streptomyces turgidiscabies strain T45, whole genome shotgun sequence		ASM148514v1	Streptomyces turgidiscabies (high GC Gram+)	strain=T45	85558	SAMD00034891	PRJDB4008	Plant Pathology and Entomology, Kagoshima Institute for Agricultural Development	2015-12-23	n/a	major	Scaffold	full	SPAdes v. 3.5.0	249x	MiSeq		GCA_001485145.1	GCF_001485145.1	yes	NC_000011.10	100	171	1.87e-84	316	bacteria
NZ_BCMN01000082.1:300-467	Sat	NZ_BCMN01000082.1	ALR	170	977	300	467	2.1e-33	123.3	3.3	Streptomyces turgidiscabies strain T45, whole genome shotgun sequence		ASM148514v1	Streptomyces turgidiscabies (high GC Gram+)	strain=T45	85558	SAMD00034891	PRJDB4008	Plant Pathology and Entomology, Kagoshima Institute for Agricultural Development	2015-12-23	n/a	major	Scaffold	full	SPAdes v. 3.5.0	249x	MiSeq		GCA_001485145.1	GCF_001485145.1	yes	NC_000011.10	100	168	8.53e-83	311	bacteria
NZ_BCMN01000082.1:468-637	Sat	NZ_BCMN01000082.1	ALR	170	977	468	637	4.4e-45	161.4	6.9	Streptomyces turgidiscabies strain T45, whole genome shotgun sequence		ASM148514v1	Streptomyces turgidiscabies (high GC Gram+)	strain=T45	85558	SAMD00034891	PRJDB4008	Plant Pathology and Entomology, Kagoshima Institute for Agricultural Development	2015-12-23	n/a	major	Scaffold	full	SPAdes v. 3.5.0	249x	MiSeq		GCA_001485145.1	GCF_001485145.1	yes	NC_000011.10	100	170	6.69e-84	315	bacteria
NZ_BCMN01000082.1:638-808	Sat	NZ_BCMN01000082.1	ALR	170	977	638	808	2.4e-37	136.2	3.8	Streptomyces turgidiscabies strain T45, whole genome shotgun sequence		ASM148514v1	Streptomyces turgidiscabies (high GC Gram+)	strain=T45	85558	SAMD00034891	PRJDB4008	Plant Pathology and Entomology, Kagoshima Institute for Agricultural Development	2015-12-23	n/a	major	Scaffold	full	SPAdes v. 3.5.0	249x	MiSeq		GCA_001485145.1	GCF_001485145.1	yes	NC_000011.10	100	171	1.87e-84	316	bacteria
NZ_BCMN01000082.1:809-977	Sat	NZ_BCMN01000082.1	ALR	169	977	809	977	1.1e-42	153.6	4.2	Streptomyces turgidiscabies strain T45, whole genome shotgun sequence		ASM148514v1	Streptomyces turgidiscabies (high GC Gram+)	strain=T45	85558	SAMD00034891	PRJDB4008	Plant Pathology and Entomology, Kagoshima Institute for Agricultural Development	2015-12-23	n/a	major	Scaffold	full	SPAdes v. 3.5.0	249x	MiSeq		GCA_001485145.1	GCF_001485145.1	yes	NC_000011.10	100	169	2.39e-83	313	bacteria
NZ_BCMN01000084.1:10-176	Sat	NZ_BCMN01000084.1	ALR	169	807	10	176	6.8e-37	134.7	3.2	Streptomyces turgidiscabies strain T45, whole genome shotgun sequence		ASM148514v1	Streptomyces turgidiscabies (high GC Gram+)	strain=T45	85558	SAMD00034891	PRJDB4008	Plant Pathology and Entomology, Kagoshima Institute for Agricultural Development	2015-12-23	n/a	major	Scaffold	full	SPAdes v. 3.5.0	249x	MiSeq		GCA_001485145.1	GCF_001485145.1	yes	NC_000006.12	100	167	3.05e-82	309	bacteria
NZ_BCMN01000084.1:177-345	Sat	NZ_BCMN01000084.1	ALR	170	807	177	345	2.5e-38	139.4	2	Streptomyces turgidiscabies strain T45, whole genome shotgun sequence		ASM148514v1	Streptomyces turgidiscabies (high GC Gram+)	strain=T45	85558	SAMD00034891	PRJDB4008	Plant Pathology and Entomology, Kagoshima Institute for Agricultural Development	2015-12-23	n/a	major	Scaffold	full	SPAdes v. 3.5.0	249x	MiSeq		GCA_001485145.1	GCF_001485145.1	yes	NC_000006.12	100	169	2.39e-83	313	bacteria
NZ_BCMN01000084.1:347-514	Sat	NZ_BCMN01000084.1	ALR	169	807	347	514	7.8e-37	134.5	5.4	Streptomyces turgidiscabies strain T45, whole genome shotgun sequence		ASM148514v1	Streptomyces turgidiscabies (high GC Gram+)	strain=T45	85558	SAMD00034891	PRJDB4008	Plant Pathology and Entomology, Kagoshima Institute for Agricultural Development	2015-12-23	n/a	major	Scaffold	full	SPAdes v. 3.5.0	249x	MiSeq		GCA_001485145.1	GCF_001485145.1	yes	NC_000006.12	100	168	8.53e-83	311	bacteria
NZ_BCMN01000084.1:516-685	Sat	NZ_BCMN01000084.1	ALR	169	807	516	685	5.6e-43	154.5	3.2	Streptomyces turgidiscabies strain T45, whole genome shotgun sequence		ASM148514v1	Streptomyces turgidiscabies (high GC Gram+)	strain=T45	85558	SAMD00034891	PRJDB4008	Plant Pathology and Entomology, Kagoshima Institute for Agricultural Development	2015-12-23	n/a	major	Scaffold	full	SPAdes v. 3.5.0	249x	MiSeq		GCA_001485145.1	GCF_001485145.1	yes	NC_000006.12	100	170	6.69e-84	315	bacteria
NZ_BCMN01000084.1:686-807	Sat	NZ_BCMN01000084.1	ALR	117	807	686	807	5e-25	96	1.9	Streptomyces turgidiscabies strain T45, whole genome shotgun sequence		ASM148514v1	Streptomyces turgidiscabies (high GC Gram+)	strain=T45	85558	SAMD00034891	PRJDB4008	Plant Pathology and Entomology, Kagoshima Institute for Agricultural Development	2015-12-23	n/a	major	Scaffold	full	SPAdes v. 3.5.0	249x	MiSeq		GCA_001485145.1	GCF_001485145.1	yes	NC_000006.12	100	116	4.62e-54	215	bacteria
NZ_BCMN01000090.1:1-169	Sat	NZ_BCMN01000090.1	ALR	168	628	1	169	2.8e-40	145.7	6.1	Streptomyces turgidiscabies strain T45, whole genome shotgun sequence		ASM148514v1	Streptomyces turgidiscabies (high GC Gram+)	strain=T45	85558	SAMD00034891	PRJDB4008	Plant Pathology and Entomology, Kagoshima Institute for Agricultural Development	2015-12-23	n/a	major	Scaffold	full	SPAdes v. 3.5.0	249x	MiSeq		GCA_001485145.1	GCF_001485145.1	yes	NC_000020.11	100	169	2.39e-83	313	bacteria
NZ_BCMN01000090.1:170-336	Sat	NZ_BCMN01000090.1	ALR	169	628	170	336	2.6e-30	113.2	7.1	Streptomyces turgidiscabies strain T45, whole genome shotgun sequence		ASM148514v1	Streptomyces turgidiscabies (high GC Gram+)	strain=T45	85558	SAMD00034891	PRJDB4008	Plant Pathology and Entomology, Kagoshima Institute for Agricultural Development	2015-12-23	n/a	major	Scaffold	full	SPAdes v. 3.5.0	249x	MiSeq		GCA_001485145.1	GCF_001485145.1	yes	NC_000020.11	100	167	3.05e-82	309	bacteria
NZ_BCMN01000090.1:337-507	Sat	NZ_BCMN01000090.1	ALR	170	628	337	507	1.1e-44	160.1	7.6	Streptomyces turgidiscabies strain T45, whole genome shotgun sequence		ASM148514v1	Streptomyces turgidiscabies (high GC Gram+)	strain=T45	85558	SAMD00034891	PRJDB4008	Plant Pathology and Entomology, Kagoshima Institute for Agricultural Development	2015-12-23	n/a	major	Scaffold	full	SPAdes v. 3.5.0	249x	MiSeq		GCA_001485145.1	GCF_001485145.1	yes	NC_000020.11	100	171	1.87e-84	316	bacteria
NZ_BCMN01000090.1:508-628	Sat	NZ_BCMN01000090.1	ALR	119	628	508	628	2.8e-30	113.1	6.3	Streptomyces turgidiscabies strain T45, whole genome shotgun sequence		ASM148514v1	Streptomyces turgidiscabies (high GC Gram+)	strain=T45	85558	SAMD00034891	PRJDB4008	Plant Pathology and Entomology, Kagoshima Institute for Agricultural Development	2015-12-23	n/a	major	Scaffold	full	SPAdes v. 3.5.0	249x	MiSeq		GCA_001485145.1	GCF_001485145.1	yes	NC_000020.11	100	121	7.6e-57	224	bacteria
NZ_BCMN01000093.1:1-159	Sat	NZ_BCMN01000093.1	ALR	160	509	1	159	3.6e-35	129.1	8.5	Streptomyces turgidiscabies strain T45, whole genome shotgun sequence		ASM148514v1	Streptomyces turgidiscabies (high GC Gram+)	strain=T45	85558	SAMD00034891	PRJDB4008	Plant Pathology and Entomology, Kagoshima Institute for Agricultural Development	2015-12-23	n/a	major	Scaffold	full	SPAdes v. 3.5.0	249x	MiSeq		GCA_001485145.1	GCF_001485145.1	yes	NC_000003.12	100	159	8.04e-78	294	bacteria
NZ_BCMN01000093.1:161-330	Sat	NZ_BCMN01000093.1	ALR	166	509	161	330	8.6e-37	134.4	10.1	Streptomyces turgidiscabies strain T45, whole genome shotgun sequence		ASM148514v1	Streptomyces turgidiscabies (high GC Gram+)	strain=T45	85558	SAMD00034891	PRJDB4008	Plant Pathology and Entomology, Kagoshima Institute for Agricultural Development	2015-12-23	n/a	major	Scaffold	full	SPAdes v. 3.5.0	249x	MiSeq		GCA_001485145.1	GCF_001485145.1	yes	NC_000003.12	100	170	6.69e-84	315	bacteria
NZ_BCMN01000093.1:332-500	Sat	NZ_BCMN01000093.1	ALR	170	509	332	500	3.8e-36	132.3	10.3	Streptomyces turgidiscabies strain T45, whole genome shotgun sequence		ASM148514v1	Streptomyces turgidiscabies (high GC Gram+)	strain=T45	85558	SAMD00034891	PRJDB4008	Plant Pathology and Entomology, Kagoshima Institute for Agricultural Development	2015-12-23	n/a	major	Scaffold	full	SPAdes v. 3.5.0	249x	MiSeq		GCA_001485145.1	GCF_001485145.1	yes	NC_000003.12	100	169	2.39e-83	313	bacteria
NZ_BCMN01000094.1:239-409	Sat	NZ_BCMN01000094.1	ALR	170	485	239	409	3.2e-39	142.3	6.3	Streptomyces turgidiscabies strain T45, whole genome shotgun sequence		ASM148514v1	Streptomyces turgidiscabies (high GC Gram+)	strain=T45	85558	SAMD00034891	PRJDB4008	Plant Pathology and Entomology, Kagoshima Institute for Agricultural Development	2015-12-23	n/a	major	Scaffold	full	SPAdes v. 3.5.0	249x	MiSeq		GCA_001485145.1	GCF_001485145.1	yes	NC_000008.11	100	171	1.87e-84	316	bacteria
NZ_BCMN01000094.1:410-485	Sat	NZ_BCMN01000094.1	ALR	75	485	410	485	7.4e-14	59.6	1	Streptomyces turgidiscabies strain T45, whole genome shotgun sequence		ASM148514v1	Streptomyces turgidiscabies (high GC Gram+)	strain=T45	85558	SAMD00034891	PRJDB4008	Plant Pathology and Entomology, Kagoshima Institute for Agricultural Development	2015-12-23	n/a	major	Scaffold	full	SPAdes v. 3.5.0	249x	MiSeq		GCA_001485145.1	GCF_001485145.1	yes	NC_000008.11	100	76	4.15e-32	141	bacteria
NZ_BCMN01000094.1:68-238	Sat	NZ_BCMN01000094.1	ALR	170	485	68	238	1.5e-38	140.1	4.8	Streptomyces turgidiscabies strain T45, whole genome shotgun sequence		ASM148514v1	Streptomyces turgidiscabies (high GC Gram+)	strain=T45	85558	SAMD00034891	PRJDB4008	Plant Pathology and Entomology, Kagoshima Institute for Agricultural Development	2015-12-23	n/a	major	Scaffold	full	SPAdes v. 3.5.0	249x	MiSeq		GCA_001485145.1	GCF_001485145.1	yes	NC_000008.11	100	171	1.87e-84	316	bacteria
NZ_BCMN01000095.1:1-154	Sat	NZ_BCMN01000095.1	ALR	152	467	154	1	5.1e-38	138.3	6	Streptomyces turgidiscabies strain T45, whole genome shotgun sequence		ASM148514v1	Streptomyces turgidiscabies (high GC Gram+)	strain=T45	85558	SAMD00034891	PRJDB4008	Plant Pathology and Entomology, Kagoshima Institute for Agricultural Development	2015-12-23	n/a	major	Scaffold	full	SPAdes v. 3.5.0	249x	MiSeq		GCA_001485145.1	GCF_001485145.1	yes	NC_000001.11	100	154	4.65e-75	285	bacteria
NZ_BCMN01000095.1:157-325	Sat	NZ_BCMN01000095.1	ALR	168	467	325	157	1.6e-40	146.5	6.2	Streptomyces turgidiscabies strain T45, whole genome shotgun sequence		ASM148514v1	Streptomyces turgidiscabies (high GC Gram+)	strain=T45	85558	SAMD00034891	PRJDB4008	Plant Pathology and Entomology, Kagoshima Institute for Agricultural Development	2015-12-23	n/a	major	Scaffold	full	SPAdes v. 3.5.0	249x	MiSeq		GCA_001485145.1	GCF_001485145.1	yes	NC_000001.11	100	169	2.39e-83	313	bacteria
NZ_BCMN01000095.1:327-467	Sat	NZ_BCMN01000095.1	ALR	142	467	467	327	6.2e-28	105.5	4.8	Streptomyces turgidiscabies strain T45, whole genome shotgun sequence		ASM148514v1	Streptomyces turgidiscabies (high GC Gram+)	strain=T45	85558	SAMD00034891	PRJDB4008	Plant Pathology and Entomology, Kagoshima Institute for Agricultural Development	2015-12-23	n/a	major	Scaffold	full	SPAdes v. 3.5.0	249x	MiSeq		GCA_001485145.1	GCF_001485145.1	yes	NC_000001.11	100	141	7.03e-68	261	bacteria
NZ_BCOD01000122.1:1-165	Sat	NZ_BCOD01000122.1	ALR	166	427	1	165	1.6e-33	123.6	2.3	Salmonella enterica strain NGUA05, whole genome shotgun sequence		ASM156962v1	Salmonella enterica (enterobacteria)	strain=NGUA05	28901	SAMD00043382	PRJDB4308	South Dakota State University	2016-1-22	n/a	major	Contig	full	SPAdes v. 3.5.0	Unknown	Illumina MiSeq kit v3		GCA_001569625.1	GCF_001569625.1	yes	NC_000006.12	99.394	165	1.81e-79	300	bacteria
NZ_BCOD01000122.1:167-334	Sat	NZ_BCOD01000122.1	ALR	168	427	167	334	8.5e-37	134.3	5.2	Salmonella enterica strain NGUA05, whole genome shotgun sequence		ASM156962v1	Salmonella enterica (enterobacteria)	strain=NGUA05	28901	SAMD00043382	PRJDB4308	South Dakota State University	2016-1-22	n/a	major	Contig	full	SPAdes v. 3.5.0	Unknown	Illumina MiSeq kit v3		GCA_001569625.1	GCF_001569625.1	yes	NC_000006.12	100	168	8.53e-83	311	bacteria
NZ_BCOD01000122.1:336-427	Sat	NZ_BCOD01000122.1	ALR	89	427	336	427	6.7e-15	63	3.1	Salmonella enterica strain NGUA05, whole genome shotgun sequence		ASM156962v1	Salmonella enterica (enterobacteria)	strain=NGUA05	28901	SAMD00043382	PRJDB4308	South Dakota State University	2016-1-22	n/a	major	Contig	full	SPAdes v. 3.5.0	Unknown	Illumina MiSeq kit v3		GCA_001569625.1	GCF_001569625.1	yes	NC_000006.12	100	92	7.01e-41	171	bacteria
NZ_BCOI01000371.1:147-457	Alu	NZ_BCOI01000371.1	AluY	304	574	147	457	1.3e-99	340.4	8.7	Salmonella enterica strain NGUA10, whole genome shotgun sequence		ASM156972v1	Salmonella enterica (enterobacteria)	strain=NGUA10	28901	SAMD00043346	PRJDB4308	South Dakota State University	2016-1-22	n/a	major	Contig	full	SPAdes v. 3.5.0	Unknown	Illumina MiSeq kit v3		GCA_001569725.1	GCF_001569725.1	yes	NC_000002.12	97.059	306	1.22e-143	514	bacteria
NZ_BCOK01000009.1:1-280	Alu	NZ_BCOK01000009.1	AluSx	270	403	1	280	3.9e-71	246.5	12.1	Salmonella enterica strain NGUA12, whole genome shotgun sequence		ASM156976v1	Salmonella enterica (enterobacteria)	strain=NGUA12	28901	SAMD00043348	PRJDB4308	South Dakota State University	2016-1-22	n/a	major	Contig	full	SPAdes v. 3.5.0	Unknown	Illumina MiSeq kit v3		GCA_001569765.1	GCF_001569765.1	yes	NC_000006.12	99.288	281	1.82e-141	507	bacteria
NZ_BCOV01000029.1:147-381	LINE	NZ_BCOV01000029.1	L1P1_orf2	214	381	381	147	6.2e-36	126.9	29.6	Salmonella enterica strain NGUA23, whole genome shotgun sequence		ASM156998v1	Salmonella enterica (enterobacteria)	strain=NGUA23	28901	SAMD00043360	PRJDB4308	South Dakota State University	2016-1-22	n/a	major	Contig	full	SPAdes v. 3.5.0	Unknown	Illumina MiSeq kit v3		GCA_001569985.1	GCF_001569985.1	yes	NC_000015.10	100	235	7.14e-120	435	bacteria
NZ_BCPC01000112.1:1-251	Alu	NZ_BCPC01000112.1	AluSx	248	395	251	1	4.4e-71	246.3	5.7	Salmonella enterica strain NGUA30, whole genome shotgun sequence		ASM157012v1	Salmonella enterica (enterobacteria)	strain=NGUA30	28901	SAMD00043368	PRJDB4308	South Dakota State University	2016-1-22	n/a	major	Contig	full	SPAdes v. 3.5.0	Unknown	Illumina MiSeq kit v3		GCA_001570125.1	GCF_001570125.1	yes	NC_000001.11	100	251	9.81e-129	464	bacteria
NZ_BDMW01000306.1:17-184	Sat	NZ_BDMW01000306.1	ALR	169	324	184	17	4.9e-41	148.1	4.8	Mycobacterium avium subsp. hominissuis strain DH-2, whole genome shotgun sequence		ASM208913v1	Mycobacterium avium subsp. hominissuis (high GC Gram+)	strain=DH-2	439334	SAMD00076681	PRJDB502	Meijo University faculty of pharmacy	2017-3-31	n/a	major	Contig	full	CLC Genomics Workbench v. 9.0	326x	Illumina HiSeq 2500 V3 (100x2)		GCA_002089135.1	GCF_002089135.1	yes	NC_000001.11	98.81	168	1.85e-79	300	bacteria
NZ_BDMW01000306.1:187-324	Sat	NZ_BDMW01000306.1	ALR	137	324	324	187	3.2e-30	112.9	6.5	Mycobacterium avium subsp. hominissuis strain DH-2, whole genome shotgun sequence		ASM208913v1	Mycobacterium avium subsp. hominissuis (high GC Gram+)	strain=DH-2	439334	SAMD00076681	PRJDB502	Meijo University faculty of pharmacy	2017-3-31	n/a	major	Contig	full	CLC Genomics Workbench v. 9.0	326x	Illumina HiSeq 2500 V3 (100x2)		GCA_002089135.1	GCF_002089135.1	yes	NC_000001.11	98.551	138	6.9e-63	244	bacteria
NZ_BDMY01000530.1:223-322	Sat	NZ_BDMY01000530.1	ALR	99	322	223	322	1.2e-22	88.3	4.3	Mycobacterium avium subsp. hominissuis strain DH-6, whole genome shotgun sequence		ASM208917v1	Mycobacterium avium subsp. hominissuis (high GC Gram+)	strain=DH-6	439334	SAMD00076652	PRJDB502	Meijo University faculty of pharmacy	2017-3-31	n/a	major	Contig	full	CLC Genomics Workbench v. 9.0	270x	Illumina HiSeq 2500 V3 (100x2)		GCA_002089175.1	GCF_002089175.1	yes	NC_000007.14	98	100	6.09e-42	174	bacteria
NZ_BDMY01000530.1:53-221	Sat	NZ_BDMY01000530.1	ALR	166	322	53	221	6.9e-41	147.7	6.6	Mycobacterium avium subsp. hominissuis strain DH-6, whole genome shotgun sequence		ASM208917v1	Mycobacterium avium subsp. hominissuis (high GC Gram+)	strain=DH-6	439334	SAMD00076652	PRJDB502	Meijo University faculty of pharmacy	2017-3-31	n/a	major	Contig	full	CLC Genomics Workbench v. 9.0	270x	Illumina HiSeq 2500 V3 (100x2)		GCA_002089175.1	GCF_002089175.1	yes	NC_000001.11	97.006	167	6.74e-74	281	bacteria
NZ_BDMZ01000276.1:129-312	Alu	NZ_BDMZ01000276.1	AluJo	169	312	129	312	8.6e-43	153.3	3.2	Mycobacterium avium subsp. hominissuis strain DH-7, whole genome shotgun sequence		ASM208919v1	Mycobacterium avium subsp. hominissuis (high GC Gram+)	strain=DH-7	439334	SAMD00076653	PRJDB502	Meijo University faculty of pharmacy	2017-3-31	n/a	major	Contig	full	CLC Genomics Workbench v. 9.0	259x	Illumina HiSeq 2500 V3 (100x2)		GCA_002089195.1	GCF_002089195.1	yes	NC_000022.11	90.751	173	9.85e-58	228	bacteria
NZ_BDNN01000545.1:1-279	LINE	NZ_BDNN01000545.1	L1HS_3end	270	285	1	279	2.3e-87	300	18.4	Mycobacterium avium subsp. hominissuis strain IH-660, whole genome shotgun sequence		ASM208947v1	Mycobacterium avium subsp. hominissuis (high GC Gram+)	strain=IH-660	439334	SAMD00076665	PRJDB502	Meijo University faculty of pharmacy	2017-3-31	n/a	major	Contig	full	CLC Genomics Workbench v. 9.0	238x	Illumina HiSeq 2500 V3 (100x2)		GCA_002089475.1	GCF_002089475.1	yes	NC_000001.11	97.037	270	6.65e-126	455	bacteria
NZ_BDNO01000246.1:164-332	Alu	NZ_BDNO01000246.1	AluJo	168	332	332	164	5.5e-43	153.9	6.5	Mycobacterium avium subsp. hominissuis strain IH-687, whole genome shotgun sequence		ASM208949v1	Mycobacterium avium subsp. hominissuis (high GC Gram+)	strain=IH-687	439334	SAMD00076666	PRJDB502	Meijo University faculty of pharmacy	2017-3-31	n/a	major	Contig	full	CLC Genomics Workbench v. 9.0	208x	Illumina HiSeq 2500 V3 (100x2)		GCA_002089495.1	GCF_002089495.1	yes	NC_000019.10	95.122	164	4.08e-66	255	bacteria
NZ_BDNO01000246.1:3-159	Alu	NZ_BDNO01000246.1	AluSz	150	332	159	3	1.4e-43	156.1	1.6	Mycobacterium avium subsp. hominissuis strain IH-687, whole genome shotgun sequence		ASM208949v1	Mycobacterium avium subsp. hominissuis (high GC Gram+)	strain=IH-687	439334	SAMD00076666	PRJDB502	Meijo University faculty of pharmacy	2017-3-31	n/a	major	Contig	full	CLC Genomics Workbench v. 9.0	208x	Illumina HiSeq 2500 V3 (100x2)		GCA_002089495.1	GCF_002089495.1	yes	NC_000007.14	97.297	148	6.25e-64	248	bacteria
NZ_BDNP01000578.1:224-427	Alu	NZ_BDNP01000578.1	AluSx	202	427	224	427	5.3e-60	210	4.8	Mycobacterium avium subsp. hominissuis strain IH-788, whole genome shotgun sequence		ASM208951v1	Mycobacterium avium subsp. hominissuis (high GC Gram+)	strain=IH-788	439334	SAMD00076667	PRJDB502	Meijo University faculty of pharmacy	2017-3-31	n/a	major	Contig	full	CLC Genomics Workbench v. 9.0	236x	Illumina HiSeq 2500 V3 (100x2)		GCA_002089515.1	GCF_002089515.1	yes	NC_000020.11	92.157	204	5.03e-76	289	bacteria
NZ_BDNP01000594.1:103-215	Alu	NZ_BDNP01000594.1	AluSg	92	241	103	215	4.6e-25	95.3	4.6	Mycobacterium avium subsp. hominissuis strain IH-788, whole genome shotgun sequence		ASM208951v1	Mycobacterium avium subsp. hominissuis (high GC Gram+)	strain=IH-788	439334	SAMD00076667	PRJDB502	Meijo University faculty of pharmacy	2017-3-31	n/a	major	Contig	full	CLC Genomics Workbench v. 9.0	236x	Illumina HiSeq 2500 V3 (100x2)		GCA_002089515.1	GCF_002089515.1	yes	NC_000018.10	98.913	92	4.32e-39	165	bacteria
NZ_BDNQ01000395.1:50-290	Alu	NZ_BDNQ01000395.1	AluSx	234	290	290	50	1.3e-76	264.6	8.6	Mycobacterium avium subsp. hominissuis strain IH-799, whole genome shotgun sequence		ASM208953v1	Mycobacterium avium subsp. hominissuis (high GC Gram+)	strain=IH-799	439334	SAMD00076668	PRJDB502	Meijo University faculty of pharmacy	2017-3-31	n/a	major	Contig	full	CLC Genomics Workbench v. 9.0	217x	Illumina HiSeq 2500 V3 (100x2)		GCA_002089535.1	GCF_002089535.1	yes	NC_000003.12	93.249	237	9.85e-94	348	bacteria
NZ_BDOD01000298.1:209-324	Sat	NZ_BDOD01000298.1	ALR	114	324	324	209	2.9e-21	83.8	6	Mycobacterium avium subsp. hominissuis strain TR-M-2, whole genome shotgun sequence		ASM208979v1	Mycobacterium avium subsp. hominissuis (high GC Gram+)	strain=TR-M-2	439334	SAMD00076693	PRJDB502	Meijo University faculty of pharmacy	2017-3-31	n/a	major	Contig	full	CLC Genomics Workbench v. 9.0	60x	Illumina MiSeq V2 (300)		GCA_002089795.1	GCF_002089795.1	yes	NC_000001.11	98.261	115	3.37e-50	202	bacteria
NZ_BDOD01000298.1:40-207	Sat	NZ_BDOD01000298.1	ALR	169	324	207	40	2.3e-35	129.7	7.2	Mycobacterium avium subsp. hominissuis strain TR-M-2, whole genome shotgun sequence		ASM208979v1	Mycobacterium avium subsp. hominissuis (high GC Gram+)	strain=TR-M-2	439334	SAMD00076693	PRJDB502	Meijo University faculty of pharmacy	2017-3-31	n/a	major	Contig	full	CLC Genomics Workbench v. 9.0	60x	Illumina MiSeq V2 (300)		GCA_002089795.1	GCF_002089795.1	yes	NC_000001.11	99.401	167	1.43e-80	303	bacteria
NZ_BDOL01000224.1:174-284	Sat	NZ_BDOL01000224.1	ALR	90	319	284	174	4.4e-18	73.5	0.7	Mycobacterium avium subsp. hominissuis strain Tone-16, whole genome shotgun sequence		ASM208995v1	Mycobacterium avium subsp. hominissuis (high GC Gram+)	strain=Tone-16	439334	SAMD00076691	PRJDB502	Meijo University faculty of pharmacy	2017-3-31	n/a	major	Contig	full	CLC Genomics Workbench v. 9.0	60x	Illumina MiSeq V2 (300)		GCA_002089955.1	GCF_002089955.1	yes	NC_000011.10	97.753	89	9.13e-36	154	bacteria
NZ_BDOL01000224.1:3-173	Sat	NZ_BDOL01000224.1	ALR	170	319	173	3	2.1e-49	175.5	6.5	Mycobacterium avium subsp. hominissuis strain Tone-16, whole genome shotgun sequence		ASM208995v1	Mycobacterium avium subsp. hominissuis (high GC Gram+)	strain=Tone-16	439334	SAMD00076691	PRJDB502	Meijo University faculty of pharmacy	2017-3-31	n/a	major	Contig	full	CLC Genomics Workbench v. 9.0	60x	Illumina MiSeq V2 (300)		GCA_002089955.1	GCF_002089955.1	yes	NC_000020.11	95.906	171	3.18e-72	276	bacteria
NZ_BDOL01000226.1:1-218	LINE	NZ_BDOL01000226.1	L1P1_orf2	217	218	1	218	5.6e-62	213.5	20	Mycobacterium avium subsp. hominissuis strain Tone-16, whole genome shotgun sequence		ASM208995v1	Mycobacterium avium subsp. hominissuis (high GC Gram+)	strain=Tone-16	439334	SAMD00076691	PRJDB502	Meijo University faculty of pharmacy	2017-3-31	n/a	major	Contig	full	CLC Genomics Workbench v. 9.0	60x	Illumina MiSeq V2 (300)		GCA_002089955.1	GCF_002089955.1	yes	NC_000004.12	94.495	218	1.91e-90	337	bacteria
NZ_BDOP01000376.1:210-296	Sat	NZ_BDOP01000376.1	ALR	85	297	210	296	4.9e-12	53.8	3.9	Mycobacterium avium subsp. hominissuis strain Tone-7, whole genome shotgun sequence		ASM209003v1	Mycobacterium avium subsp. hominissuis (high GC Gram+)	strain=Tone-7	439334	SAMD00076679	PRJDB502	Meijo University faculty of pharmacy	2017-3-31	n/a	major	Contig	full	CLC Genomics Workbench v. 9.0	289x	Illumina HiSeq 2500 V3 (100x2)		GCA_002090035.1	GCF_002090035.1	yes	NC_000004.12	100	87	3.9e-38	161	bacteria
NZ_BDOP01000376.1:39-209	Sat	NZ_BDOP01000376.1	ALR	170	297	39	209	3.2e-44	158.6	5	Mycobacterium avium subsp. hominissuis strain Tone-7, whole genome shotgun sequence		ASM209003v1	Mycobacterium avium subsp. hominissuis (high GC Gram+)	strain=Tone-7	439334	SAMD00076679	PRJDB502	Meijo University faculty of pharmacy	2017-3-31	n/a	major	Contig	full	CLC Genomics Workbench v. 9.0	289x	Illumina HiSeq 2500 V3 (100x2)		GCA_002090035.1	GCF_002090035.1	yes	NC_000004.12	94.737	171	1.91e-69	267	bacteria
NZ_BDQM01000292.1:11-268	Alu	NZ_BDQM01000292.1	AluSz	263	268	11	268	1.5e-82	284.2	5.3	Colwellia marinimaniae strain MTCD1, whole genome shotgun sequence		ASM220786v1	Colwellia marinimaniae (g-proteobacteria)	strain=MTCD1	1513592	SAMD00081185	PRJDB5767	National Institute of Technology, Wakayama College	2017-6-12	n/a	major	Contig	full	SPAdes v. 3.9.1	143x	MiSeq; Illumina	Representative Genome	GCA_002207865.1	GCF_002207865.1	yes	NC_000018.10	91.506	259	6.36e-96	355	bacteria
NZ_BDQM01000370.1:10-255	LINE	NZ_BDQM01000370.1	L1P1_orf2	248	255	255	10	2e-71	244.8	32.7	Colwellia marinimaniae strain MTCD1, whole genome shotgun sequence		ASM220786v1	Colwellia marinimaniae (g-proteobacteria)	strain=MTCD1	1513592	SAMD00081185	PRJDB5767	National Institute of Technology, Wakayama College	2017-6-12	n/a	major	Contig	full	SPAdes v. 3.9.1	143x	MiSeq; Illumina	Representative Genome	GCA_002207865.1	GCF_002207865.1	yes	NC_000010.11	100	246	5.77e-126	455	bacteria
NZ_BDQM01000373.1:3-255	LTR	NZ_BDQM01000373.1	ERVL	236	255	255	3	1.9e-17	63.5	1.5	Colwellia marinimaniae strain MTCD1, whole genome shotgun sequence		ASM220786v1	Colwellia marinimaniae (g-proteobacteria)	strain=MTCD1	1513592	SAMD00081185	PRJDB5767	National Institute of Technology, Wakayama College	2017-6-12	n/a	major	Contig	full	SPAdes v. 3.9.1	143x	MiSeq; Illumina	Representative Genome	GCA_002207865.1	GCF_002207865.1	yes	NC_000008.11	100	253	7.65e-130	468	bacteria
NZ_BDQM01000413.1:116-249	Alu	NZ_BDQM01000413.1	AluSx	123	249	116	249	2.1e-30	112.8	5.2	Colwellia marinimaniae strain MTCD1, whole genome shotgun sequence		ASM220786v1	Colwellia marinimaniae (g-proteobacteria)	strain=MTCD1	1513592	SAMD00081185	PRJDB5767	National Institute of Technology, Wakayama College	2017-6-12	n/a	major	Contig	full	SPAdes v. 3.9.1	143x	MiSeq; Illumina	Representative Genome	GCA_002207865.1	GCF_002207865.1	yes	NC_000003.12	100	134	5.14e-64	248	bacteria
NZ_BDQM01000497.1:4-239	LINE	NZ_BDQM01000497.1	L1MC4_3end	266	239	239	4	1.7e-29	105.9	19.9	Colwellia marinimaniae strain MTCD1, whole genome shotgun sequence		ASM220786v1	Colwellia marinimaniae (g-proteobacteria)	strain=MTCD1	1513592	SAMD00081185	PRJDB5767	National Institute of Technology, Wakayama College	2017-6-12	n/a	major	Contig	full	SPAdes v. 3.9.1	143x	MiSeq; Illumina	Representative Genome	GCA_002207865.1	GCF_002207865.1	yes	NC_000010.11	100	236	1.99e-120	436	bacteria
NZ_BDQM01000537.1:1-233	Alu	NZ_BDQM01000537.1	AluSz	239	233	233	1	2.2e-64	224.5	1.8	Colwellia marinimaniae strain MTCD1, whole genome shotgun sequence		ASM220786v1	Colwellia marinimaniae (g-proteobacteria)	strain=MTCD1	1513592	SAMD00081185	PRJDB5767	National Institute of Technology, Wakayama College	2017-6-12	n/a	major	Contig	full	SPAdes v. 3.9.1	143x	MiSeq; Illumina	Representative Genome	GCA_002207865.1	GCF_002207865.1	yes	NC_000007.14	100	232	3.31e-118	429	bacteria
NZ_BDYP01000026.1:388-1135	LINE	NZ_BDYP01000026.1	L1MC4_3end	685	1627	1135	388	2.3e-132	447.4	50.6	Staphylococcus aureus strain M6C013, whole genome shotgun sequence	WP_117220820.1;WP_117431080.1	ASM342050v1	Staphylococcus aureus (firmicutes)	strain=M6C013	1280	SAMD00083547	PRJDB5246	Medical Mycology Research Center	2018-8-20	n/a	major	Scaffold	full	SPAdes v. 3.11.1	435x	HiSeq2500		GCA_003420505.1	GCF_003420505.1	yes	NC_000008.11	79.214	611	1.95e-110	405	bacteria
NZ_BDYS01000041.1:4271-4994	LINE	NZ_BDYS01000041.1	L1PBa_5end	694	5553	4994	4271	2.2e-53	184.8	111.5	Staphylococcus aureus strain M6C025, whole genome shotgun sequence	WP_117196720.1;WP_117196721.1;WP_117196722.1	ASM342056v1	Staphylococcus aureus (firmicutes)	strain=M6C025	1280	SAMD00083550	PRJDB5246	Medical Mycology Research Center	2018-8-20	n/a	major	Scaffold	full	SPAdes v. 3.11.1	354x	HiSeq2500		GCA_003420565.1	GCF_003420565.1	yes	NC_000002.12	93.023	43	4.7e-07	62.1	bacteria
NZ_BDYS01000041.1:945-4237	LINE	NZ_BDYS01000041.1	L1P1_orf2	3285	5553	4237	945	0	1744	433.5	Staphylococcus aureus strain M6C025, whole genome shotgun sequence	WP_117196720.1;WP_117196721.1;WP_117196722.1	ASM342056v1	Staphylococcus aureus (firmicutes)	strain=M6C025	1280	SAMD00083550	PRJDB5246	Medical Mycology Research Center	2018-8-20	n/a	major	Scaffold	full	SPAdes v. 3.11.1	354x	HiSeq2500		GCA_003420565.1	GCF_003420565.1	yes	NC_000003.12	73.221	3331	0	1112	bacteria
NZ_BDZH01000027.1:1-899	LINE	NZ_BDZH01000027.1	L1P1_orf2	897	1594	1	899	1.8e-142	480.4	109.4	Staphylococcus aureus strain M6C051, whole genome shotgun sequence	WP_117433676.1	ASM342096v1	Staphylococcus aureus (firmicutes)	strain=M6C051	1280	SAMD00083565	PRJDB5246	Medical Mycology Research Center	2018-8-20	n/a	major	Scaffold	full	SPAdes v. 3.11.1	303x	HiSeq2500		GCA_003420965.1	GCF_003420965.1	yes	NC_000011.10	74.667	900	1.43e-102	379	bacteria
NZ_BDZV01000044.1:1-549	LINE	NZ_BDZV01000044.1	L1MC4_3end	539	2226	549	1	1.2e-110	375	26.2	Staphylococcus aureus strain M6K003, whole genome shotgun sequence	WP_117219288.1;WP_117219287.1	ASM342124v1	Staphylococcus aureus (firmicutes)	strain=M6K003	1280	SAMD00083579	PRJDB5246	Medical Mycology Research Center	2018-8-20	n/a	major	Contig	full	SPAdes v. 3.11.1	365x	HiSeq2500		GCA_003421245.1	GCF_003421245.1	yes	NC_000008.11	79.742	543	1.11e-101	375	bacteria
NZ_BDZV01000045.1:538-2213	LINE	NZ_BDZV01000045.1	L1P1_orf2	1655	2213	538	2213	2.9e-295	987.4	197.5	Staphylococcus aureus strain M6K003, whole genome shotgun sequence	WP_117219289.1	ASM342124v1	Staphylococcus aureus (firmicutes)	strain=M6K003	1280	SAMD00083579	PRJDB5246	Medical Mycology Research Center	2018-8-20	n/a	major	Contig	full	SPAdes v. 3.11.1	365x	HiSeq2500		GCA_003421245.1	GCF_003421245.1	yes	NC_000017.11	76.349	1649	0	837	bacteria
NZ_BDZV01000048.1:1018-1767	LINE	NZ_BDZV01000048.1	L1PBa_5end	780	1769	1018	1767	7.7e-52	179.6	118.4	Staphylococcus aureus strain M6K003, whole genome shotgun sequence		ASM342124v1	Staphylococcus aureus (firmicutes)	strain=M6K003	1280	SAMD00083579	PRJDB5246	Medical Mycology Research Center	2018-8-20	n/a	major	Contig	full	SPAdes v. 3.11.1	365x	HiSeq2500		GCA_003421245.1	GCF_003421245.1	yes	NC_000002.12	79.31	116	4.84e-12	78.7	bacteria
NZ_BDZV01000055.1:1-1027	LINE	NZ_BDZV01000055.1	L1P1_orf2	1016	1236	1027	1	1.3e-128	434.3	144	Staphylococcus aureus strain M6K003, whole genome shotgun sequence	WP_117219293.1	ASM342124v1	Staphylococcus aureus (firmicutes)	strain=M6K003	1280	SAMD00083579	PRJDB5246	Medical Mycology Research Center	2018-8-20	n/a	major	Contig	full	SPAdes v. 3.11.1	365x	HiSeq2500		GCA_003421245.1	GCF_003421245.1	yes	NC_000001.11	75.644	932	7.43e-121	440	bacteria
NZ_BDZV01000059.1:488-1150	LINE	NZ_BDZV01000059.1	L1MC4_3end	616	1150	1150	488	4.7e-101	343.2	45.7	Staphylococcus aureus strain M6K003, whole genome shotgun sequence	WP_117219294.1;WP_117219295.1	ASM342124v1	Staphylococcus aureus (firmicutes)	strain=M6K003	1280	SAMD00083579	PRJDB5246	Medical Mycology Research Center	2018-8-20	n/a	major	Contig	full	SPAdes v. 3.11.1	365x	HiSeq2500		GCA_003421245.1	GCF_003421245.1	yes	NC_000007.14	78.972	428	8.41e-74	283	bacteria
NZ_BDZV01000077.1:1-500	LINE	NZ_BDZV01000077.1	L1P1_orf2	479	768	500	1	1.3e-72	248.6	64.4	Staphylococcus aureus strain M6K003, whole genome shotgun sequence		ASM342124v1	Staphylococcus aureus (firmicutes)	strain=M6K003	1280	SAMD00083579	PRJDB5246	Medical Mycology Research Center	2018-8-20	n/a	major	Contig	full	SPAdes v. 3.11.1	365x	HiSeq2500		GCA_003421245.1	GCF_003421245.1	yes	NC_000001.11	76.299	481	8.21e-63	246	bacteria
NZ_BDZV01000077.1:539-768	LINE	NZ_BDZV01000077.1	L1PBa_5end	209	768	768	539	3.3e-21	77.9	18.6	Staphylococcus aureus strain M6K003, whole genome shotgun sequence		ASM342124v1	Staphylococcus aureus (firmicutes)	strain=M6K003	1280	SAMD00083579	PRJDB5246	Medical Mycology Research Center	2018-8-20	n/a	major	Contig	full	SPAdes v. 3.11.1	365x	HiSeq2500		GCA_003421245.1	GCF_003421245.1	yes	NC_000002.12	83.824	68	3.81e-08	63.9	bacteria
NZ_BDZV01000080.1:1-534	LINE	NZ_BDZV01000080.1	L1P1_orf2	522	676	1	534	8e-70	239.3	80.4	Staphylococcus aureus strain M6K003, whole genome shotgun sequence		ASM342124v1	Staphylococcus aureus (firmicutes)	strain=M6K003	1280	SAMD00083579	PRJDB5246	Medical Mycology Research Center	2018-8-20	n/a	major	Contig	full	SPAdes v. 3.11.1	365x	HiSeq2500		GCA_003421245.1	GCF_003421245.1	yes	NC_000010.11	74.861	541	1.14e-56	226	bacteria
NZ_BDZV01000084.1:1-628	LINE	NZ_BDZV01000084.1	L1P1_orf2	621	632	628	1	3.6e-58	200.6	82.6	Staphylococcus aureus strain M6K003, whole genome shotgun sequence		ASM342124v1	Staphylococcus aureus (firmicutes)	strain=M6K003	1280	SAMD00083579	PRJDB5246	Medical Mycology Research Center	2018-8-20	n/a	major	Contig	full	SPAdes v. 3.11.1	365x	HiSeq2500		GCA_003421245.1	GCF_003421245.1	yes	NC_000005.10	73.62	326	8.59e-19	100	bacteria
NZ_BDZV01000089.1:1-526	LINE	NZ_BDZV01000089.1	L1P1_orf2	521	526	526	1	1.4e-109	371.3	69.1	Staphylococcus aureus strain M6K003, whole genome shotgun sequence		ASM342124v1	Staphylococcus aureus (firmicutes)	strain=M6K003	1280	SAMD00083579	PRJDB5246	Medical Mycology Research Center	2018-8-20	n/a	major	Contig	full	SPAdes v. 3.11.1	365x	HiSeq2500		GCA_003421245.1	GCF_003421245.1	yes	NC_000023.11	82.163	527	2.86e-122	444	bacteria
NZ_BDZV01000090.1:1-525	LINE	NZ_BDZV01000090.1	L1P1_orf2	521	525	1	525	1.7e-86	294.6	59.3	Staphylococcus aureus strain M6K003, whole genome shotgun sequence		ASM342124v1	Staphylococcus aureus (firmicutes)	strain=M6K003	1280	SAMD00083579	PRJDB5246	Medical Mycology Research Center	2018-8-20	n/a	major	Contig	full	SPAdes v. 3.11.1	365x	HiSeq2500		GCA_003421245.1	GCF_003421245.1	yes	NC_000002.12	78.095	525	1.39e-85	322	bacteria
NZ_BDZV01000104.1:1-391	LINE	NZ_BDZV01000104.1	L1P1_orf2	385	391	391	1	7.2e-55	189.7	56.7	Staphylococcus aureus strain M6K003, whole genome shotgun sequence		ASM342124v1	Staphylococcus aureus (firmicutes)	strain=M6K003	1280	SAMD00083579	PRJDB5246	Medical Mycology Research Center	2018-8-20	n/a	major	Contig	full	SPAdes v. 3.11.1	365x	HiSeq2500		GCA_003421245.1	GCF_003421245.1	yes	NC_000014.9	78.453	362	1.37e-59	235	bacteria
NZ_BDZV01000121.1:8-304	LINE	NZ_BDZV01000121.1	L1P1_orf2	272	304	304	8	4e-30	107.6	46.7	Staphylococcus aureus strain M6K003, whole genome shotgun sequence		ASM342124v1	Staphylococcus aureus (firmicutes)	strain=M6K003	1280	SAMD00083579	PRJDB5246	Medical Mycology Research Center	2018-8-20	n/a	major	Contig	full	SPAdes v. 3.11.1	365x	HiSeq2500		GCA_003421245.1	GCF_003421245.1	yes	NC_000009.12	78.598	271	6.22e-42	176	bacteria
NZ_BDZV01000144.1:6-222	LINE	NZ_BDZV01000144.1	L1PBa_5end	208	222	222	6	1.2e-21	79.4	17.7	Staphylococcus aureus strain M6K003, whole genome shotgun sequence	WP_117219306.1	ASM342124v1	Staphylococcus aureus (firmicutes)	strain=M6K003	1280	SAMD00083579	PRJDB5246	Medical Mycology Research Center	2018-8-20	n/a	major	Contig	full	SPAdes v. 3.11.1	365x	HiSeq2500		GCA_003421245.1	GCF_003421245.1	yes	NC_000004.12	100	28	7.71e-05	52.8	bacteria
NZ_BDZV01000153.1:1-205	LINE	NZ_BDZV01000153.1	L1P1_orf2	203	205	205	1	1.9e-28	102	23.3	Staphylococcus aureus strain M6K003, whole genome shotgun sequence		ASM342124v1	Staphylococcus aureus (firmicutes)	strain=M6K003	1280	SAMD00083579	PRJDB5246	Medical Mycology Research Center	2018-8-20	n/a	major	Contig	full	SPAdes v. 3.11.1	365x	HiSeq2500		GCA_003421245.1	GCF_003421245.1	yes	NC_000010.11	84.466	206	2.44e-49	200	bacteria
NZ_BEAB01000019.1:4299-5079	LINE	NZ_BEAB01000019.1	L1PBa_5end	698	5928	5079	4299	1.8e-53	184.9	119	Staphylococcus aureus strain M6K023, whole genome shotgun sequence	WP_117220820.1;WP_117221994.1;WP_117221517.1	ASM342136v1	Staphylococcus aureus (firmicutes)	strain=M6K023	1280	SAMD00083585	PRJDB5246	Medical Mycology Research Center	2018-8-20	n/a	major	Contig	full	SPAdes v. 3.11.1	490x	HiSeq2500		GCA_003421365.1	GCF_003421365.1	yes	NC_000004.12	100	28	0.000306	52.8	bacteria
NZ_BEAB01000019.1:973-4263	LINE	NZ_BEAB01000019.1	L1P1_orf2	3278	5928	4263	973	0	1762.5	431.9	Staphylococcus aureus strain M6K023, whole genome shotgun sequence	WP_117220820.1;WP_117221994.1;WP_117221517.1	ASM342136v1	Staphylococcus aureus (firmicutes)	strain=M6K023	1280	SAMD00083585	PRJDB5246	Medical Mycology Research Center	2018-8-20	n/a	major	Contig	full	SPAdes v. 3.11.1	490x	HiSeq2500		GCA_003421365.1	GCF_003421365.1	yes	NC_000023.11	73.42	3322	0	1136	bacteria
NZ_BEAF01000015.1:4285-5052	LINE	NZ_BEAF01000015.1	L1PBa_5end	697	5773	5052	4285	1.3e-53	185.4	115.5	Staphylococcus aureus strain M6K034, whole genome shotgun sequence	WP_117225163.1;WP_117225165.1;WP_117225164.1	ASM342144v1	Staphylococcus aureus (firmicutes)	strain=M6K034	1280	SAMD00083589	PRJDB5246	Medical Mycology Research Center	2018-8-20	n/a	major	Contig	full	SPAdes v. 3.11.1	499x	HiSeq2500		GCA_003421445.1	GCF_003421445.1	yes	NC_000004.12	100	28	0.000301	52.8	bacteria
NZ_BEAF01000015.1:943-4233	LINE	NZ_BEAF01000015.1	L1P1_orf2	3278	5773	4233	943	0	1728.5	440.7	Staphylococcus aureus strain M6K034, whole genome shotgun sequence	WP_117225163.1;WP_117225165.1;WP_117225164.1	ASM342144v1	Staphylococcus aureus (firmicutes)	strain=M6K034	1280	SAMD00083589	PRJDB5246	Medical Mycology Research Center	2018-8-20	n/a	major	Contig	full	SPAdes v. 3.11.1	499x	HiSeq2500		GCA_003421445.1	GCF_003421445.1	yes	NC_000007.14	73.112	3336	0	1085	bacteria
NZ_BEAF01000100.1:1-152	LTR	NZ_BEAF01000100.1	MIRb	142	227	152	1	1.4e-14	61.3	7.9	Staphylococcus aureus strain M6K034, whole genome shotgun sequence		ASM342144v1	Staphylococcus aureus (firmicutes)	strain=M6K034	1280	SAMD00083589	PRJDB5246	Medical Mycology Research Center	2018-8-20	n/a	major	Contig	full	SPAdes v. 3.11.1	499x	HiSeq2500		GCA_003421445.1	GCF_003421445.1	yes	NC_000008.11	96.97	33	3.91e-06	56.5	bacteria
NZ_BEAF01000114.1:8-219	LINE	NZ_BEAF01000114.1	L1MC4_3end	203	219	219	8	8.7e-35	123.3	12.5	Staphylococcus aureus strain M6K034, whole genome shotgun sequence	WP_117225173.1	ASM342144v1	Staphylococcus aureus (firmicutes)	strain=M6K034	1280	SAMD00083589	PRJDB5246	Medical Mycology Research Center	2018-8-20	n/a	major	Contig	full	SPAdes v. 3.11.1	499x	HiSeq2500		GCA_003421445.1	GCF_003421445.1	yes	NC_000001.11	88.636	132	4.3e-37	159	bacteria
NZ_BEAO01000029.1:1-1528	LINE	NZ_BEAO01000029.1	L1P1_orf2	1515	2680	1528	1	1.3e-198	666.7	202	Staphylococcus aureus strain M6K051, whole genome shotgun sequence	WP_117221517.1	ASM342162v1	Staphylococcus aureus (firmicutes)	strain=M6K051	1280	SAMD00083598	PRJDB5246	Medical Mycology Research Center	2018-8-20	n/a	major	Scaffold	full	SPAdes v. 3.11.1	300x	HiSeq2500		GCA_003421625.1	GCF_003421625.1	yes	NC_000001.11	73.543	1527	2.3e-152	545	bacteria
NZ_BEAO01000046.1:1-1269	LINE	NZ_BEAO01000046.1	L1P1_orf2	1271	1269	1269	1	3.4e-212	711.8	169.2	Staphylococcus aureus strain M6K051, whole genome shotgun sequence		ASM342162v1	Staphylococcus aureus (firmicutes)	strain=M6K051	1280	SAMD00083598	PRJDB5246	Medical Mycology Research Center	2018-8-20	n/a	major	Scaffold	full	SPAdes v. 3.11.1	300x	HiSeq2500		GCA_003421625.1	GCF_003421625.1	yes	NC_000002.12	75.31	1292	1.87e-162	579	bacteria
NZ_BEAO01000048.1:1-632	LINE	NZ_BEAO01000048.1	L1MC4_3end	634	1255	632	1	5e-131	442.6	41.3	Staphylococcus aureus strain M6K051, whole genome shotgun sequence	WP_117221527.1	ASM342162v1	Staphylococcus aureus (firmicutes)	strain=M6K051	1280	SAMD00083598	PRJDB5246	Medical Mycology Research Center	2018-8-20	n/a	major	Scaffold	full	SPAdes v. 3.11.1	300x	HiSeq2500		GCA_003421625.1	GCF_003421625.1	yes	NC_000008.11	79.431	598	1.64e-110	405	bacteria
NZ_BEAO01000058.1:10-731	LINE	NZ_BEAO01000058.1	L1P1_orf2	695	909	731	10	2.8e-101	343.7	83.1	Staphylococcus aureus strain M6K051, whole genome shotgun sequence		ASM342162v1	Staphylococcus aureus (firmicutes)	strain=M6K051	1280	SAMD00083598	PRJDB5246	Medical Mycology Research Center	2018-8-20	n/a	major	Scaffold	full	SPAdes v. 3.11.1	300x	HiSeq2500		GCA_003421625.1	GCF_003421625.1	yes	NC_000017.11	76.32	701	6.91e-95	353	bacteria
NZ_BEAO01000079.1:1-620	LINE	NZ_BEAO01000079.1	L1P1_orf2	616	620	620	1	1.3e-126	427.7	75.9	Staphylococcus aureus strain M6K051, whole genome shotgun sequence		ASM342162v1	Staphylococcus aureus (firmicutes)	strain=M6K051	1280	SAMD00083598	PRJDB5246	Medical Mycology Research Center	2018-8-20	n/a	major	Scaffold	full	SPAdes v. 3.11.1	300x	HiSeq2500		GCA_003421625.1	GCF_003421625.1	yes	NC_000023.11	81.399	586	7.25e-129	466	bacteria
NZ_BEAO01000083.1:91-579	LINE	NZ_BEAO01000083.1	L1MC4_3end	443	579	579	91	3.7e-57	197.5	38	Staphylococcus aureus strain M6K051, whole genome shotgun sequence	WP_117221529.1	ASM342162v1	Staphylococcus aureus (firmicutes)	strain=M6K051	1280	SAMD00083598	PRJDB5246	Medical Mycology Research Center	2018-8-20	n/a	major	Scaffold	full	SPAdes v. 3.11.1	300x	HiSeq2500		GCA_003421625.1	GCF_003421625.1	yes	NC_000006.12	80.567	247	2.29e-43	182	bacteria
NZ_BEAO01000095.1:1-479	LINE	NZ_BEAO01000095.1	L1P1_orf2	475	479	479	1	3.4e-65	223.9	69.1	Staphylococcus aureus strain M6K051, whole genome shotgun sequence		ASM342162v1	Staphylococcus aureus (firmicutes)	strain=M6K051	1280	SAMD00083598	PRJDB5246	Medical Mycology Research Center	2018-8-20	n/a	major	Scaffold	full	SPAdes v. 3.11.1	300x	HiSeq2500		GCA_003421625.1	GCF_003421625.1	yes	NC_000013.11	77.778	486	1.66e-74	285	bacteria
NZ_BEAO01000170.1:14-212	LINE	NZ_BEAO01000170.1	L1P1_orf2	171	213	212	14	7.8e-23	83.3	15.1	Staphylococcus aureus strain M6K051, whole genome shotgun sequence		ASM342162v1	Staphylococcus aureus (firmicutes)	strain=M6K051	1280	SAMD00083598	PRJDB5246	Medical Mycology Research Center	2018-8-20	n/a	major	Scaffold	full	SPAdes v. 3.11.1	300x	HiSeq2500		GCA_003421625.1	GCF_003421625.1	yes	NC_000003.12	84.524	168	3.09e-38	163	bacteria
NZ_BEAO01000175.1:3-163	LTR	NZ_BEAO01000175.1	MIR	131	212	3	163	2.6e-11	50.6	5.2	Staphylococcus aureus strain M6K051, whole genome shotgun sequence		ASM342162v1	Staphylococcus aureus (firmicutes)	strain=M6K051	1280	SAMD00083598	PRJDB5246	Medical Mycology Research Center	2018-8-20	n/a	major	Scaffold	full	SPAdes v. 3.11.1	300x	HiSeq2500		GCA_003421625.1	GCF_003421625.1	yes	NC_000003.12	92.857	42	9.01e-08	62.1	bacteria
NZ_BEAU01000039.1:1562-4852	LINE	NZ_BEAU01000039.1	L1P1_orf2	3285	6311	1562	4852	0	1750.5	436.5	Staphylococcus aureus strain M6K068, whole genome shotgun sequence	WP_117219195.1;WP_117219196.1;WP_117219197.1	ASM342174v1	Staphylococcus aureus (firmicutes)	strain=M6K068	1280	SAMD00083604	PRJDB5246	Medical Mycology Research Center	2018-8-20	n/a	major	Scaffold	full	SPAdes v. 3.11.1	380x	HiSeq2500		GCA_003421745.1	GCF_003421745.1	yes	NC_000002.12	73.237	3333	0	1112	bacteria
NZ_BEAU01000097.1:2-247	LINE	NZ_BEAU01000097.1	L1P1_orf2	242	247	247	2	7.1e-24	86.8	30.4	Staphylococcus aureus strain M6K068, whole genome shotgun sequence		ASM342174v1	Staphylococcus aureus (firmicutes)	strain=M6K068	1280	SAMD00083604	PRJDB5246	Medical Mycology Research Center	2018-8-20	n/a	major	Scaffold	full	SPAdes v. 3.11.1	380x	HiSeq2500		GCA_003421745.1	GCF_003421745.1	yes	NC_000018.10	76.923	221	1.11e-23	115	bacteria
NZ_BEAU01000100.1:3-240	LINE	NZ_BEAU01000100.1	L1P1_orf2	216	240	3	240	2.8e-25	91.5	38.3	Staphylococcus aureus strain M6K068, whole genome shotgun sequence		ASM342174v1	Staphylococcus aureus (firmicutes)	strain=M6K068	1280	SAMD00083604	PRJDB5246	Medical Mycology Research Center	2018-8-20	n/a	major	Scaffold	full	SPAdes v. 3.11.1	380x	HiSeq2500		GCA_003421745.1	GCF_003421745.1	yes	NC_000003.12	76.804	194	6.45e-21	106	bacteria
NZ_BEBG01000018.1:1019-4311	LINE	NZ_BEBG01000018.1	L1P1_orf2	3285	5264	1019	4311	0	1750	437.1	Staphylococcus aureus strain M6K094, whole genome shotgun sequence	WP_117207180.1;WP_117207181.1;WP_117207182.1	ASM342198v1	Staphylococcus aureus (firmicutes)	strain=M6K094	1280	SAMD00083616	PRJDB5246	Medical Mycology Research Center	2018-8-20	n/a	major	Scaffold	full	SPAdes v. 3.11.1	443x	HiSeq2500		GCA_003421985.1	GCF_003421985.1	yes	NC_000003.12	73.285	3339	0	1112	bacteria
NZ_BEBJ01000023.1:986-4276	LINE	NZ_BEBJ01000023.1	L1P1_orf2	3285	5394	4276	986	0	1744.2	438	Staphylococcus aureus strain M6K100, whole genome shotgun sequence	WP_117433897.1;WP_117433898.1;WP_117433899.1;WP_117433900.1	ASM342204v1	Staphylococcus aureus (firmicutes)	strain=M6K100	1280	SAMD00083619	PRJDB5246	Medical Mycology Research Center	2018-8-20	n/a	major	Scaffold	full	SPAdes v. 3.11.1	485x	HiSeq2500		GCA_003422045.1	GCF_003422045.1	yes	NC_000007.14	73.223	3335	0	1107	bacteria
NZ_BEBM01000025.1:2119-5409	LINE	NZ_BEBM01000025.1	L1P1_orf2	3285	6395	2119	5409	0	1754	428.6	Staphylococcus aureus strain M6K105, whole genome shotgun sequence	WP_117220818.1;WP_117218912.1;WP_117220819.1;WP_117220820.1	ASM342210v1	Staphylococcus aureus (firmicutes)	strain=M6K105	1280	SAMD00083622	PRJDB5246	Medical Mycology Research Center	2018-8-20	n/a	major	Scaffold	full	SPAdes v. 3.11.1	411x	HiSeq2500		GCA_003422105.1	GCF_003422105.1	yes	NC_000023.11	73.253	3335	0	1114	bacteria
NZ_BEBW01000037.1:1453-2244	LINE	NZ_BEBW01000037.1	L1PBa_5end	698	6372	1453	2244	1.6e-52	181.8	119.5	Staphylococcus aureus strain M6K123, whole genome shotgun sequence	WP_117218650.1;WP_117218652.1;WP_117218654.1	ASM342230v1	Staphylococcus aureus (firmicutes)	strain=M6K123	1280	SAMD00083632	PRJDB5246	Medical Mycology Research Center	2018-8-20	n/a	major	Scaffold	full	SPAdes v. 3.11.1	314x	HiSeq2500		GCA_003422305.1	GCF_003422305.1	yes	NC_000004.12	100	28	0.000311	52.8	bacteria
NZ_BEBW01000037.1:2278-5570	LINE	NZ_BEBW01000037.1	L1P1_orf2	3285	6372	2278	5570	0	1754.5	440.6	Staphylococcus aureus strain M6K123, whole genome shotgun sequence	WP_117218650.1;WP_117218652.1;WP_117218654.1	ASM342230v1	Staphylococcus aureus (firmicutes)	strain=M6K123	1280	SAMD00083632	PRJDB5246	Medical Mycology Research Center	2018-8-20	n/a	major	Scaffold	full	SPAdes v. 3.11.1	314x	HiSeq2500		GCA_003422305.1	GCF_003422305.1	yes	NC_000023.11	73.335	3334	0	1131	bacteria
NZ_BECC01000060.1:359-1105	LINE	NZ_BECC01000060.1	L1MC4_3end	685	1295	359	1105	2e-131	443.9	49.6	Staphylococcus aureus strain M6K144, whole genome shotgun sequence	WP_117223275.1	ASM342242v1	Staphylococcus aureus (firmicutes)	strain=M6K144	1280	SAMD00083638	PRJDB5246	Medical Mycology Research Center	2018-8-20	n/a	major	Contig	full	SPAdes v. 3.11.1	520x	HiSeq2500		GCA_003422425.1	GCF_003422425.1	yes	NC_000008.11	79.248	612	1.95e-110	405	bacteria
NZ_BECF01000023.1:1407-4697	LINE	NZ_BECF01000023.1	L1P1_orf2	3285	6608	4697	1407	0	1733.1	437.6	Staphylococcus aureus strain M6K150, whole genome shotgun sequence	WP_117218282.1;WP_117218283.1;WP_117218284.1;WP_117218285.1;WP_117218286.1	ASM342248v1	Staphylococcus aureus (firmicutes)	strain=M6K150	1280	SAMD00083641	PRJDB5246	Medical Mycology Research Center	2018-8-20	n/a	major	Scaffold	full	SPAdes v. 3.11.1	274x	HiSeq2500		GCA_003422485.1	GCF_003422485.1	yes	NC_000003.12	73.23	3347	0	1090	bacteria
NZ_BECF01000023.1:261-535	LINE	NZ_BECF01000023.1	L1MC4_3end	217	6608	535	261	1.1e-15	59.9	33.2	Staphylococcus aureus strain M6K150, whole genome shotgun sequence	WP_117218282.1;WP_117218283.1;WP_117218284.1;WP_117218285.1;WP_117218286.1	ASM342248v1	Staphylococcus aureus (firmicutes)	strain=M6K150	1280	SAMD00083641	PRJDB5246	Medical Mycology Research Center	2018-8-20	n/a	major	Scaffold	full	SPAdes v. 3.11.1	274x	HiSeq2500		GCA_003422485.1	GCF_003422485.1	yes	NC_000011.10	82.55	149	1.62e-27	128	bacteria
NZ_BECH01000027.1:937-4229	LINE	NZ_BECH01000027.1	L1P1_orf2	3285	5932	4229	937	0	1755.2	436.7	Staphylococcus aureus strain M6K153, whole genome shotgun sequence	WP_117181678.1;WP_117181681.1;WP_117181683.1;WP_117181685.1	ASM342252v1	Staphylococcus aureus (firmicutes)	strain=M6K153	1280	SAMD00083643	PRJDB5246	Medical Mycology Research Center	2018-8-20	n/a	major	Scaffold	full	SPAdes v. 3.11.1	297x	HiSeq2500		GCA_003422525.1	GCF_003422525.1	yes	NC_000023.11	73.389	3337	0	1136	bacteria
NZ_BECL01000014.1:929-4219	LINE	NZ_BECL01000014.1	L1P1_orf2	3285	4300	4219	929	0	1741.6	436.5	Staphylococcus aureus strain M6K162, whole genome shotgun sequence	WP_117224666.1;WP_117224667.1	ASM342260v1	Staphylococcus aureus (firmicutes)	strain=M6K162	1280	SAMD00083647	PRJDB5246	Medical Mycology Research Center	2018-8-20	n/a	major	Scaffold	full	SPAdes v. 3.11.1	277x	HiSeq2500		GCA_003422605.1	GCF_003422605.1	yes	NC_000007.14	73.101	3331	0	1090	bacteria
NZ_BECL01000026.1:350-474	LINE	NZ_BECL01000026.1	L1MC4_3end	107	494	474	350	5.1e-11	44.4	16.3	Staphylococcus aureus strain M6K162, whole genome shotgun sequence		ASM342260v1	Staphylococcus aureus (firmicutes)	strain=M6K162	1280	SAMD00083647	PRJDB5246	Medical Mycology Research Center	2018-8-20	n/a	major	Scaffold	full	SPAdes v. 3.11.1	277x	HiSeq2500		GCA_003422605.1	GCF_003422605.1	yes	NC_000015.10	91.25	80	8.32e-22	108	bacteria
NZ_BEDI01000027.1:1256-4545	LINE	NZ_BEDI01000027.1	L1P1_orf2	3278	5526	1256	4545	0	1743	443.2	Staphylococcus aureus strain M6K219, whole genome shotgun sequence	WP_117218911.1;WP_117218912.1;WP_117218913.1	ASM342312v1	Staphylococcus aureus (firmicutes)	strain=M6K219	1280	SAMD00083670	PRJDB5246	Medical Mycology Research Center	2018-8-20	n/a	major	Scaffold	full	SPAdes v. 3.11.1	225x	HiSeq2500		GCA_003423125.1	GCF_003423125.1	yes	NC_000023.11	73.435	3339	0	1142	bacteria
NZ_BEDI01000027.1:496-1219	LINE	NZ_BEDI01000027.1	L1PBa_5end	686	5526	496	1219	6.9e-53	183	108.1	Staphylococcus aureus strain M6K219, whole genome shotgun sequence	WP_117218911.1;WP_117218912.1;WP_117218913.1	ASM342312v1	Staphylococcus aureus (firmicutes)	strain=M6K219	1280	SAMD00083670	PRJDB5246	Medical Mycology Research Center	2018-8-20	n/a	major	Scaffold	full	SPAdes v. 3.11.1	225x	HiSeq2500		GCA_003423125.1	GCF_003423125.1	yes	NC_000004.12	100	28	0.000283	52.8	bacteria
NZ_BEDJ01000015.1:971-4270	LINE	NZ_BEDJ01000015.1	L1P1_orf2	3285	6139	4270	971	0	1762.1	437.3	Staphylococcus aureus strain M6K221, whole genome shotgun sequence	WP_117203972.1;WP_117203973.1;WP_117203974.1	ASM342346v1	Staphylococcus aureus (firmicutes)	strain=M6K221	1280	SAMD00083671	PRJDB5246	Medical Mycology Research Center	2018-8-20	n/a	major	Contig	full	SPAdes v. 3.11.1	383x	HiSeq2500		GCA_003423465.1	GCF_003423465.1	yes	NC_000023.11	73.443	3340	0	1142	bacteria
NZ_BEDJ01000056.1:9-304	LINE	NZ_BEDJ01000056.1	L1P1_orf2	275	304	304	9	5e-27	97.4	29.4	Staphylococcus aureus strain M6K221, whole genome shotgun sequence		ASM342346v1	Staphylococcus aureus (firmicutes)	strain=M6K221	1280	SAMD00083671	PRJDB5246	Medical Mycology Research Center	2018-8-20	n/a	major	Contig	full	SPAdes v. 3.11.1	383x	HiSeq2500		GCA_003423465.1	GCF_003423465.1	yes	NC_000001.11	76.03	267	4.89e-28	130	bacteria
NZ_BEDR01000036.1:4304-5011	LINE	NZ_BEDR01000036.1	L1PBa_5end	678	5941	5011	4304	1.4e-53	185.4	103.1	Staphylococcus aureus strain M6K232, whole genome shotgun sequence	WP_117219689.1;WP_117219690.1;WP_117219691.1	ASM342362v1	Staphylococcus aureus (firmicutes)	strain=M6K232	1280	SAMD00083679	PRJDB5246	Medical Mycology Research Center	2018-8-20	n/a	major	Scaffold	full	SPAdes v. 3.11.1	334x	HiSeq2500		GCA_003423625.1	GCF_003423625.1	yes	NC_000004.12	100	28	0.000277	52.8	bacteria
NZ_BEDR01000036.1:978-4268	LINE	NZ_BEDR01000036.1	L1P1_orf2	3289	5941	4268	978	0	1725.6	434.9	Staphylococcus aureus strain M6K232, whole genome shotgun sequence	WP_117219689.1;WP_117219690.1;WP_117219691.1	ASM342362v1	Staphylococcus aureus (firmicutes)	strain=M6K232	1280	SAMD00083679	PRJDB5246	Medical Mycology Research Center	2018-8-20	n/a	major	Scaffold	full	SPAdes v. 3.11.1	334x	HiSeq2500		GCA_003423625.1	GCF_003423625.1	yes	NC_000023.11	73.206	3344	0	1092	bacteria
NZ_BEDS01000027.1:1431-4721	LINE	NZ_BEDS01000027.1	L1P1_orf2	3285	5730	1431	4721	0	1744.4	430.9	Staphylococcus aureus strain M6K233, whole genome shotgun sequence	WP_117203955.1;WP_117203956.1;WP_117203957.1	ASM342364v1	Staphylococcus aureus (firmicutes)	strain=M6K233	1280	SAMD00083680	PRJDB5246	Medical Mycology Research Center	2018-8-20	n/a	major	Scaffold	full	SPAdes v. 3.11.1	368x	HiSeq2500		GCA_003423645.1	GCF_003423645.1	yes	NC_000002.12	73.299	3337	0	1118	bacteria
NZ_BEFF01000056.1:1-87	Sat	NZ_BEFF01000056.1	ALR	85	832	87	1	1.1e-11	52.4	4	Enterobacter hormaechei strain TUM10692, whole genome shotgun sequence		ASM233408v1	Enterobacter hormaechei (enterobacteria)	strain=TUM10692	158836	SAMD00089485	PRJDB6127	Toho University	2017-8-28	n/a	major	Scaffold	full	CLC genomics workbench v. 9.5.4	156x	illumina MiSeq		GCA_002334085.1	GCF_002334085.1	yes	NC_000011.10	100	87	3.9e-38	161	bacteria
NZ_BEFF01000056.1:259-429	Sat	NZ_BEFF01000056.1	ALR	170	832	429	259	1.2e-47	169.6	4.9	Enterobacter hormaechei strain TUM10692, whole genome shotgun sequence		ASM233408v1	Enterobacter hormaechei (enterobacteria)	strain=TUM10692	158836	SAMD00089485	PRJDB6127	Toho University	2017-8-28	n/a	major	Scaffold	full	CLC genomics workbench v. 9.5.4	156x	illumina MiSeq		GCA_002334085.1	GCF_002334085.1	yes	NC_000011.10	97.576	165	6.83e-74	281	bacteria
NZ_BEFF01000056.1:430-600	Sat	NZ_BEFF01000056.1	ALR	170	832	600	430	2.8e-48	171.7	7.1	Enterobacter hormaechei strain TUM10692, whole genome shotgun sequence		ASM233408v1	Enterobacter hormaechei (enterobacteria)	strain=TUM10692	158836	SAMD00089485	PRJDB6127	Toho University	2017-8-28	n/a	major	Scaffold	full	CLC genomics workbench v. 9.5.4	156x	illumina MiSeq		GCA_002334085.1	GCF_002334085.1	yes	NC_000017.11	94.675	169	2.48e-68	263	bacteria
NZ_BEFF01000056.1:601-770	Sat	NZ_BEFF01000056.1	ALR	170	832	770	601	5.1e-53	187.1	5.8	Enterobacter hormaechei strain TUM10692, whole genome shotgun sequence		ASM233408v1	Enterobacter hormaechei (enterobacteria)	strain=TUM10692	158836	SAMD00089485	PRJDB6127	Toho University	2017-8-28	n/a	major	Scaffold	full	CLC genomics workbench v. 9.5.4	156x	illumina MiSeq		GCA_002334085.1	GCF_002334085.1	yes	NC_000009.12	95.322	171	1.47e-70	270	bacteria
NZ_BEFF01000056.1:88-258	Sat	NZ_BEFF01000056.1	ALR	170	832	258	88	1e-42	153.5	8	Enterobacter hormaechei strain TUM10692, whole genome shotgun sequence		ASM233408v1	Enterobacter hormaechei (enterobacteria)	strain=TUM10692	158836	SAMD00089485	PRJDB6127	Toho University	2017-8-28	n/a	major	Scaffold	full	CLC genomics workbench v. 9.5.4	156x	illumina MiSeq		GCA_002334085.1	GCF_002334085.1	yes	NC_000011.10	100	171	1.87e-84	316	bacteria
NZ_BEFF01000058.1:1020-1194	HSATII	NZ_BEFF01000058.1	HSATII	168	1197	1020	1194	1.7e-36	132.6	13.2	Enterobacter hormaechei strain TUM10692, whole genome shotgun sequence	WP_096151877.1	ASM233408v1	Enterobacter hormaechei (enterobacteria)	strain=TUM10692	158836	SAMD00089485	PRJDB6127	Toho University	2017-8-28	n/a	major	Scaffold	full	CLC genomics workbench v. 9.5.4	156x	illumina MiSeq		GCA_002334085.1	GCF_002334085.1	yes	NC_000001.11	99.429	175	5.35e-85	318	bacteria
NZ_BEFF01000058.1:108-275	HSATII	NZ_BEFF01000058.1	HSATII	168	1197	108	275	7.3e-42	150.1	14.5	Enterobacter hormaechei strain TUM10692, whole genome shotgun sequence	WP_096151877.1	ASM233408v1	Enterobacter hormaechei (enterobacteria)	strain=TUM10692	158836	SAMD00089485	PRJDB6127	Toho University	2017-8-28	n/a	major	Scaffold	full	CLC genomics workbench v. 9.5.4	156x	illumina MiSeq		GCA_002334085.1	GCF_002334085.1	yes	NC_000001.11	99.405	168	3.97e-81	305	bacteria
NZ_BEFF01000058.1:428-578	HSATII	NZ_BEFF01000058.1	HSATII	153	1197	428	578	1.7e-41	148.8	12.7	Enterobacter hormaechei strain TUM10692, whole genome shotgun sequence	WP_096151877.1	ASM233408v1	Enterobacter hormaechei (enterobacteria)	strain=TUM10692	158836	SAMD00089485	PRJDB6127	Toho University	2017-8-28	n/a	major	Scaffold	full	CLC genomics workbench v. 9.5.4	156x	illumina MiSeq		GCA_002334085.1	GCF_002334085.1	yes	NC_000001.11	96.689	151	4.61e-65	252	bacteria
NZ_BEFF01000058.1:677-843	HSATII	NZ_BEFF01000058.1	HSATII	167	1197	677	843	2.3e-40	145.2	14.3	Enterobacter hormaechei strain TUM10692, whole genome shotgun sequence	WP_096151877.1	ASM233408v1	Enterobacter hormaechei (enterobacteria)	strain=TUM10692	158836	SAMD00089485	PRJDB6127	Toho University	2017-8-28	n/a	major	Scaffold	full	CLC genomics workbench v. 9.5.4	156x	illumina MiSeq		GCA_002334085.1	GCF_002334085.1	yes	NC_000001.11	100	167	3.05e-82	309	bacteria
NZ_BEFF01000058.1:844-1019	HSATII	NZ_BEFF01000058.1	HSATII	166	1197	844	1019	6.7e-39	140.4	17.3	Enterobacter hormaechei strain TUM10692, whole genome shotgun sequence	WP_096151877.1	ASM233408v1	Enterobacter hormaechei (enterobacteria)	strain=TUM10692	158836	SAMD00089485	PRJDB6127	Toho University	2017-8-28	n/a	major	Scaffold	full	CLC genomics workbench v. 9.5.4	156x	illumina MiSeq		GCA_002334085.1	GCF_002334085.1	yes	NC_000001.11	100	176	3.22e-87	326	bacteria
NZ_BEFF01000060.1:120-683	LINE	NZ_BEFF01000060.1	L1P1_orf2	563	683	683	120	2.2e-198	666	63.9	Enterobacter hormaechei strain TUM10692, whole genome shotgun sequence		ASM233408v1	Enterobacter hormaechei (enterobacteria)	strain=TUM10692	158836	SAMD00089485	PRJDB6127	Toho University	2017-8-28	n/a	major	Scaffold	full	CLC genomics workbench v. 9.5.4	156x	illumina MiSeq		GCA_002334085.1	GCF_002334085.1	yes	NC_000023.11	98.582	564	0	998	bacteria
NZ_BEFF01000063.1:1-1477	LINE	NZ_BEFF01000063.1	L1P1_orf2	1479	1477	1477	1	0	1807	108.8	Enterobacter hormaechei strain TUM10692, whole genome shotgun sequence		ASM233408v1	Enterobacter hormaechei (enterobacteria)	strain=TUM10692	158836	SAMD00089485	PRJDB6127	Toho University	2017-8-28	n/a	major	Scaffold	full	CLC genomics workbench v. 9.5.4	156x	illumina MiSeq		GCA_002334085.1	GCF_002334085.1	yes	NC_000004.12	96.284	1480	0	2425	bacteria
NZ_BEFF01000064.1:189-357	Sat	NZ_BEFF01000064.1	ALR	168	501	189	357	8.4e-45	160.3	9	Enterobacter hormaechei strain TUM10692, whole genome shotgun sequence		ASM233408v1	Enterobacter hormaechei (enterobacteria)	strain=TUM10692	158836	SAMD00089485	PRJDB6127	Toho University	2017-8-28	n/a	major	Scaffold	full	CLC genomics workbench v. 9.5.4	156x	illumina MiSeq		GCA_002334085.1	GCF_002334085.1	yes	NC_000001.11	97.633	169	1.12e-76	291	bacteria
NZ_BEFF01000064.1:19-187	Sat	NZ_BEFF01000064.1	ALR	170	501	19	187	3.8e-44	158.2	6.9	Enterobacter hormaechei strain TUM10692, whole genome shotgun sequence		ASM233408v1	Enterobacter hormaechei (enterobacteria)	strain=TUM10692	158836	SAMD00089485	PRJDB6127	Toho University	2017-8-28	n/a	major	Scaffold	full	CLC genomics workbench v. 9.5.4	156x	illumina MiSeq		GCA_002334085.1	GCF_002334085.1	yes	NC_000012.12	97.633	169	1.12e-76	291	bacteria
NZ_BEFF01000064.1:359-501	Sat	NZ_BEFF01000064.1	ALR	142	501	359	501	2.1e-35	129.7	3.4	Enterobacter hormaechei strain TUM10692, whole genome shotgun sequence		ASM233408v1	Enterobacter hormaechei (enterobacteria)	strain=TUM10692	158836	SAMD00089485	PRJDB6127	Toho University	2017-8-28	n/a	major	Scaffold	full	CLC genomics workbench v. 9.5.4	156x	illumina MiSeq		GCA_002334085.1	GCF_002334085.1	yes	NC_000001.11	99.306	144	2.57e-67	259	bacteria
NZ_BEFH01000087.1:1-112	HSATII	NZ_BEFH01000087.1	HSATII	101	1164	1	112	1.4e-25	97	6.2	Enterobacter hormaechei strain TUM10694, whole genome shotgun sequence	WP_096179768.1;WP_016831114.1	ASM233412v1	Enterobacter hormaechei (enterobacteria)	strain=TUM10694	158836	SAMD00089487	PRJDB6127	Toho University	2017-8-28	n/a	major	Scaffold	full	CLC genomics workbench v. 9.5.4	88x	illumina MiSeq		GCA_002334125.1	GCF_002334125.1	yes	NC_000001.11	100	112	6.99e-52	207	bacteria
NZ_BEFH01000087.1:238-405	HSATII	NZ_BEFH01000087.1	HSATII	168	1164	238	405	7.6e-43	153.3	13.7	Enterobacter hormaechei strain TUM10694, whole genome shotgun sequence	WP_096179768.1;WP_016831114.1	ASM233412v1	Enterobacter hormaechei (enterobacteria)	strain=TUM10694	158836	SAMD00089487	PRJDB6127	Toho University	2017-8-28	n/a	major	Scaffold	full	CLC genomics workbench v. 9.5.4	88x	illumina MiSeq		GCA_002334125.1	GCF_002334125.1	yes	NC_000001.11	98.81	168	1.85e-79	300	bacteria
NZ_BEFH01000087.1:543-708	HSATII	NZ_BEFH01000087.1	HSATII	165	1164	543	708	8.7e-39	140.1	16	Enterobacter hormaechei strain TUM10694, whole genome shotgun sequence	WP_096179768.1;WP_016831114.1	ASM233412v1	Enterobacter hormaechei (enterobacteria)	strain=TUM10694	158836	SAMD00089487	PRJDB6127	Toho University	2017-8-28	n/a	major	Scaffold	full	CLC genomics workbench v. 9.5.4	88x	illumina MiSeq		GCA_002334125.1	GCF_002334125.1	yes	NC_000001.11	100	166	1.09e-81	307	bacteria
NZ_BEFH01000087.1:807-973	HSATII	NZ_BEFH01000087.1	HSATII	167	1164	807	973	2.3e-40	145.2	14.3	Enterobacter hormaechei strain TUM10694, whole genome shotgun sequence	WP_096179768.1;WP_016831114.1	ASM233412v1	Enterobacter hormaechei (enterobacteria)	strain=TUM10694	158836	SAMD00089487	PRJDB6127	Toho University	2017-8-28	n/a	major	Scaffold	full	CLC genomics workbench v. 9.5.4	88x	illumina MiSeq		GCA_002334125.1	GCF_002334125.1	yes	NC_000001.11	100	167	3.05e-82	309	bacteria
NZ_BEFH01000087.1:974-1145	HSATII	NZ_BEFH01000087.1	HSATII	166	1164	974	1145	6.7e-39	140.4	17.1	Enterobacter hormaechei strain TUM10694, whole genome shotgun sequence	WP_096179768.1;WP_016831114.1	ASM233412v1	Enterobacter hormaechei (enterobacteria)	strain=TUM10694	158836	SAMD00089487	PRJDB6127	Toho University	2017-8-28	n/a	major	Scaffold	full	CLC genomics workbench v. 9.5.4	88x	illumina MiSeq		GCA_002334125.1	GCF_002334125.1	yes	NC_000001.11	100	172	5.24e-85	318	bacteria
NZ_BEFH01000109.1:170-1411	LINE	NZ_BEFH01000109.1	L1P1_orf2	1241	1411	170	1411	0	1526.5	144.6	Enterobacter hormaechei strain TUM10694, whole genome shotgun sequence		ASM233412v1	Enterobacter hormaechei (enterobacteria)	strain=TUM10694	158836	SAMD00089487	PRJDB6127	Toho University	2017-8-28	n/a	major	Scaffold	full	CLC genomics workbench v. 9.5.4	88x	illumina MiSeq		GCA_002334125.1	GCF_002334125.1	yes	NC_000002.12	98.068	1242	0	2161	bacteria
NZ_BEFH01000110.1:1-1023	LINE	NZ_BEFH01000110.1	L1P1_orf2	1021	1023	1023	1	0	1304	68.5	Enterobacter hormaechei strain TUM10694, whole genome shotgun sequence		ASM233412v1	Enterobacter hormaechei (enterobacteria)	strain=TUM10694	158836	SAMD00089487	PRJDB6127	Toho University	2017-8-28	n/a	major	Scaffold	full	CLC genomics workbench v. 9.5.4	88x	illumina MiSeq		GCA_002334125.1	GCF_002334125.1	yes	NC_000003.12	98.338	1023	0	1796	bacteria
NZ_BFAC01000066.1:257-558	Alu	NZ_BFAC01000066.1	AluJo	290	561	257	558	2.5e-81	279.9	5.1	Microcystis aeruginosa NIES-87, whole genome shotgun sequence		ASM293383v1	Microcystis aeruginosa NIES-87 (cyanobacteria)	strain=NIES-87	449440	SAMD00107617	PRJDB6597	National Institute for Environmental Studies	2018-1-25	n/a	major	Scaffold	full	SPAdes v. 3.7.1	95x	Illumina MiSeq		GCA_002933835.1	GCF_002933835.1	yes	NC_000001.11	98.993	298	9.07e-150	534	bacteria
NZ_BFAC01000068.1:271-558	LINE	NZ_BFAC01000068.1	L1HS_3end	268	558	558	271	3.1e-46	164	14.8	Microcystis aeruginosa NIES-87, whole genome shotgun sequence	WP_104398439.1	ASM293383v1	Microcystis aeruginosa NIES-87 (cyanobacteria)	strain=NIES-87	449440	SAMD00107617	PRJDB6597	National Institute for Environmental Studies	2018-1-25	n/a	major	Scaffold	full	SPAdes v. 3.7.1	95x	Illumina MiSeq		GCA_002933835.1	GCF_002933835.1	yes	NC_000008.11	99.653	288	1.44e-147	527	bacteria
NZ_BFAC01000072.1:1-164	Sat	NZ_BFAC01000072.1	ALR	162	541	164	1	1.6e-37	136.7	7.9	Microcystis aeruginosa NIES-87, whole genome shotgun sequence		ASM293383v1	Microcystis aeruginosa NIES-87 (cyanobacteria)	strain=NIES-87	449440	SAMD00107617	PRJDB6597	National Institute for Environmental Studies	2018-1-25	n/a	major	Scaffold	full	SPAdes v. 3.7.1	95x	Illumina MiSeq		GCA_002933835.1	GCF_002933835.1	yes	NC_000020.11	100	164	1.39e-80	303	bacteria
NZ_BFAC01000072.1:166-336	Sat	NZ_BFAC01000072.1	ALR	170	541	336	166	1.5e-44	159.7	12.9	Microcystis aeruginosa NIES-87, whole genome shotgun sequence		ASM293383v1	Microcystis aeruginosa NIES-87 (cyanobacteria)	strain=NIES-87	449440	SAMD00107617	PRJDB6597	National Institute for Environmental Studies	2018-1-25	n/a	major	Scaffold	full	SPAdes v. 3.7.1	95x	Illumina MiSeq		GCA_002933835.1	GCF_002933835.1	yes	NC_000020.11	100	171	1.87e-84	316	bacteria
NZ_BFAC01000072.1:337-505	Sat	NZ_BFAC01000072.1	ALR	170	541	505	337	2.8e-44	158.7	2.9	Microcystis aeruginosa NIES-87, whole genome shotgun sequence		ASM293383v1	Microcystis aeruginosa NIES-87 (cyanobacteria)	strain=NIES-87	449440	SAMD00107617	PRJDB6597	National Institute for Environmental Studies	2018-1-25	n/a	major	Scaffold	full	SPAdes v. 3.7.1	95x	Illumina MiSeq		GCA_002933835.1	GCF_002933835.1	yes	NC_000018.10	98.83	171	1.44e-80	303	bacteria
NZ_BFCK01000460.1:106-276	Sat	NZ_BFCK01000460.1	ALR	170	370	106	276	1.5e-48	172.5	4.6	Proteus mirabilis strain MH13-009N, whole genome shotgun sequence		ASM311489v1	Proteus mirabilis (enterobacteria)	strain=MH13-009N	584	SAMD00112926	PRJDB6655	National Institute of Infectious Diseases	2018-4-11	n/a	major	Contig	full	CLC Genomic Workbench v. 9.0	296.9x	Illumina MiniSeq		GCA_003114895.1	GCF_003114895.1	yes	NC_000018.10	99.415	171	8.71e-83	311	bacteria
NZ_BFCK01000460.1:1-105	Sat	NZ_BFCK01000460.1	ALR	104	370	1	105	2e-21	84.1	6.2	Proteus mirabilis strain MH13-009N, whole genome shotgun sequence		ASM311489v1	Proteus mirabilis (enterobacteria)	strain=MH13-009N	584	SAMD00112926	PRJDB6655	National Institute of Infectious Diseases	2018-4-11	n/a	major	Contig	full	CLC Genomic Workbench v. 9.0	296.9x	Illumina MiniSeq		GCA_003114895.1	GCF_003114895.1	yes	NC_000018.10	100	105	4.99e-48	195	bacteria
NZ_BFCK01000460.1:277-370	Sat	NZ_BFCK01000460.1	ALR	92	370	277	370	5.9e-17	69.6	5	Proteus mirabilis strain MH13-009N, whole genome shotgun sequence		ASM311489v1	Proteus mirabilis (enterobacteria)	strain=MH13-009N	584	SAMD00112926	PRJDB6655	National Institute of Infectious Diseases	2018-4-11	n/a	major	Contig	full	CLC Genomic Workbench v. 9.0	296.9x	Illumina MiniSeq		GCA_003114895.1	GCF_003114895.1	yes	NC_000018.10	100	94	5.59e-42	174	bacteria
NZ_BFCK01000518.1:1-463	LINE	NZ_BFCK01000518.1	L1P1_orf2	461	463	1	463	7.7e-164	551.3	53	Proteus mirabilis strain MH13-009N, whole genome shotgun sequence		ASM311489v1	Proteus mirabilis (enterobacteria)	strain=MH13-009N	584	SAMD00112926	PRJDB6655	National Institute of Infectious Diseases	2018-4-11	n/a	major	Contig	full	CLC Genomic Workbench v. 9.0	296.9x	Illumina MiniSeq		GCA_003114895.1	GCF_003114895.1	yes	NC_000004.12	99.136	463	0	833	bacteria
NZ_BFCK01000521.1:229-398	Sat	NZ_BFCK01000521.1	ALR	170	792	398	229	2.8e-43	155.3	4.1	Proteus mirabilis strain MH13-009N, whole genome shotgun sequence		ASM311489v1	Proteus mirabilis (enterobacteria)	strain=MH13-009N	584	SAMD00112926	PRJDB6655	National Institute of Infectious Diseases	2018-4-11	n/a	major	Contig	full	CLC Genomic Workbench v. 9.0	296.9x	Illumina MiniSeq		GCA_003114895.1	GCF_003114895.1	yes	NC_000011.10	100	170	6.69e-84	315	bacteria
NZ_BFCK01000521.1:399-569	Sat	NZ_BFCK01000521.1	ALR	170	792	569	399	1.5e-36	133.4	3.5	Proteus mirabilis strain MH13-009N, whole genome shotgun sequence		ASM311489v1	Proteus mirabilis (enterobacteria)	strain=MH13-009N	584	SAMD00112926	PRJDB6655	National Institute of Infectious Diseases	2018-4-11	n/a	major	Contig	full	CLC Genomic Workbench v. 9.0	296.9x	Illumina MiniSeq		GCA_003114895.1	GCF_003114895.1	yes	NC_000011.10	100	171	1.87e-84	316	bacteria
NZ_BFCK01000521.1:570-739	Sat	NZ_BFCK01000521.1	ALR	170	792	739	570	3.9e-45	161.4	6.9	Proteus mirabilis strain MH13-009N, whole genome shotgun sequence		ASM311489v1	Proteus mirabilis (enterobacteria)	strain=MH13-009N	584	SAMD00112926	PRJDB6655	National Institute of Infectious Diseases	2018-4-11	n/a	major	Contig	full	CLC Genomic Workbench v. 9.0	296.9x	Illumina MiniSeq		GCA_003114895.1	GCF_003114895.1	yes	NC_000011.10	100	170	6.69e-84	315	bacteria
NZ_BFCK01000521.1:58-228	Sat	NZ_BFCK01000521.1	ALR	170	792	228	58	9.9e-43	153.5	8	Proteus mirabilis strain MH13-009N, whole genome shotgun sequence		ASM311489v1	Proteus mirabilis (enterobacteria)	strain=MH13-009N	584	SAMD00112926	PRJDB6655	National Institute of Infectious Diseases	2018-4-11	n/a	major	Contig	full	CLC Genomic Workbench v. 9.0	296.9x	Illumina MiniSeq		GCA_003114895.1	GCF_003114895.1	yes	NC_000011.10	100	171	1.87e-84	316	bacteria
NZ_BFCK01000531.1:1-137	HSATII	NZ_BFCK01000531.1	HSATII	126	643	1	137	1.9e-27	103	16.2	Proteus mirabilis strain MH13-009N, whole genome shotgun sequence	WP_050277360.1	ASM311489v1	Proteus mirabilis (enterobacteria)	strain=MH13-009N	584	SAMD00112926	PRJDB6655	National Institute of Infectious Diseases	2018-4-11	n/a	major	Contig	full	CLC Genomic Workbench v. 9.0	296.9x	Illumina MiniSeq		GCA_003114895.1	GCF_003114895.1	yes	NC_000016.10	99.27	137	5.28e-64	248	bacteria
NZ_BFCK01000531.1:210-376	HSATII	NZ_BFCK01000531.1	HSATII	169	643	210	376	1e-40	146.2	15.3	Proteus mirabilis strain MH13-009N, whole genome shotgun sequence	WP_050277360.1	ASM311489v1	Proteus mirabilis (enterobacteria)	strain=MH13-009N	584	SAMD00112926	PRJDB6655	National Institute of Infectious Diseases	2018-4-11	n/a	major	Contig	full	CLC Genomic Workbench v. 9.0	296.9x	Illumina MiniSeq		GCA_003114895.1	GCF_003114895.1	yes	NC_000016.10	100	167	3.05e-82	309	bacteria
NZ_BFCK01000531.1:377-552	HSATII	NZ_BFCK01000531.1	HSATII	168	643	377	552	5.5e-43	153.6	14.4	Proteus mirabilis strain MH13-009N, whole genome shotgun sequence	WP_050277360.1	ASM311489v1	Proteus mirabilis (enterobacteria)	strain=MH13-009N	584	SAMD00112926	PRJDB6655	National Institute of Infectious Diseases	2018-4-11	n/a	major	Contig	full	CLC Genomic Workbench v. 9.0	296.9x	Illumina MiniSeq		GCA_003114895.1	GCF_003114895.1	yes	NC_000016.10	98.295	176	3.24e-82	309	bacteria
NZ_BFCK01000532.1:121-290	HSATII	NZ_BFCK01000532.1	HSATII	166	546	121	290	4.3e-41	147.5	10.3	Proteus mirabilis strain MH13-009N, whole genome shotgun sequence		ASM311489v1	Proteus mirabilis (enterobacteria)	strain=MH13-009N	584	SAMD00112926	PRJDB6655	National Institute of Infectious Diseases	2018-4-11	n/a	major	Contig	full	CLC Genomic Workbench v. 9.0	296.9x	Illumina MiniSeq		GCA_003114895.1	GCF_003114895.1	yes	NC_000016.10	99.412	170	3.11e-82	309	bacteria
NZ_BFCK01000532.1:291-432	HSATII	NZ_BFCK01000532.1	HSATII	141	546	291	432	3.7e-37	134.7	13.4	Proteus mirabilis strain MH13-009N, whole genome shotgun sequence		ASM311489v1	Proteus mirabilis (enterobacteria)	strain=MH13-009N	584	SAMD00112926	PRJDB6655	National Institute of Infectious Diseases	2018-4-11	n/a	major	Contig	full	CLC Genomic Workbench v. 9.0	296.9x	Illumina MiniSeq		GCA_003114895.1	GCF_003114895.1	yes	NC_000016.10	97.887	142	1.99e-63	246	bacteria
NZ_BFCK01000542.1:1006-1178	HSATII	NZ_BFCK01000542.1	HSATII	168	1383	1006	1178	1.5e-39	142.5	17.8	Proteus mirabilis strain MH13-009N, whole genome shotgun sequence	WP_109024053.1;WP_016831114.1	ASM311489v1	Proteus mirabilis (enterobacteria)	strain=MH13-009N	584	SAMD00112926	PRJDB6655	National Institute of Infectious Diseases	2018-4-11	n/a	major	Contig	full	CLC Genomic Workbench v. 9.0	296.9x	Illumina MiniSeq		GCA_003114895.1	GCF_003114895.1	yes	NC_000001.11	100	173	1.47e-85	320	bacteria
NZ_BFCK01000542.1:1-143	HSATII	NZ_BFCK01000542.1	HSATII	134	1383	1	143	3.8e-35	128.1	10.4	Proteus mirabilis strain MH13-009N, whole genome shotgun sequence	WP_109024053.1;WP_016831114.1	ASM311489v1	Proteus mirabilis (enterobacteria)	strain=MH13-009N	584	SAMD00112926	PRJDB6655	National Institute of Infectious Diseases	2018-4-11	n/a	major	Contig	full	CLC Genomic Workbench v. 9.0	296.9x	Illumina MiniSeq		GCA_003114895.1	GCF_003114895.1	yes	NC_000001.11	100	143	5.53e-69	265	bacteria
NZ_BFCK01000542.1:1251-1383	HSATII	NZ_BFCK01000542.1	HSATII	126	1383	1251	1383	7.8e-27	101	9.6	Proteus mirabilis strain MH13-009N, whole genome shotgun sequence	WP_109024053.1;WP_016831114.1	ASM311489v1	Proteus mirabilis (enterobacteria)	strain=MH13-009N	584	SAMD00112926	PRJDB6655	National Institute of Infectious Diseases	2018-4-11	n/a	major	Contig	full	CLC Genomic Workbench v. 9.0	296.9x	Illumina MiniSeq		GCA_003114895.1	GCF_003114895.1	yes	NC_000001.11	99.248	133	8.52e-62	241	bacteria
NZ_BFCK01000542.1:270-437	HSATII	NZ_BFCK01000542.1	HSATII	168	1383	270	437	1.6e-43	155.4	12.6	Proteus mirabilis strain MH13-009N, whole genome shotgun sequence	WP_109024053.1;WP_016831114.1	ASM311489v1	Proteus mirabilis (enterobacteria)	strain=MH13-009N	584	SAMD00112926	PRJDB6655	National Institute of Infectious Diseases	2018-4-11	n/a	major	Contig	full	CLC Genomic Workbench v. 9.0	296.9x	Illumina MiniSeq		GCA_003114895.1	GCF_003114895.1	yes	NC_000001.11	98.81	168	1.85e-79	300	bacteria
NZ_BFCK01000542.1:575-740	HSATII	NZ_BFCK01000542.1	HSATII	165	1383	575	740	8.2e-39	140.1	16	Proteus mirabilis strain MH13-009N, whole genome shotgun sequence	WP_109024053.1;WP_016831114.1	ASM311489v1	Proteus mirabilis (enterobacteria)	strain=MH13-009N	584	SAMD00112926	PRJDB6655	National Institute of Infectious Diseases	2018-4-11	n/a	major	Contig	full	CLC Genomic Workbench v. 9.0	296.9x	Illumina MiniSeq		GCA_003114895.1	GCF_003114895.1	yes	NC_000001.11	100	166	1.09e-81	307	bacteria
NZ_BFCK01000542.1:839-1005	HSATII	NZ_BFCK01000542.1	HSATII	167	1383	839	1005	2.2e-40	145.2	14.3	Proteus mirabilis strain MH13-009N, whole genome shotgun sequence	WP_109024053.1;WP_016831114.1	ASM311489v1	Proteus mirabilis (enterobacteria)	strain=MH13-009N	584	SAMD00112926	PRJDB6655	National Institute of Infectious Diseases	2018-4-11	n/a	major	Contig	full	CLC Genomic Workbench v. 9.0	296.9x	Illumina MiniSeq		GCA_003114895.1	GCF_003114895.1	yes	NC_000001.11	100	167	3.05e-82	309	bacteria
NZ_BFCK01000547.1:1-573	LINE	NZ_BFCK01000547.1	L1P1_orf2	571	573	1	573	1e-206	693.5	52.3	Proteus mirabilis strain MH13-009N, whole genome shotgun sequence		ASM311489v1	Proteus mirabilis (enterobacteria)	strain=MH13-009N	584	SAMD00112926	PRJDB6655	National Institute of Infectious Diseases	2018-4-11	n/a	major	Contig	full	CLC Genomic Workbench v. 9.0	296.9x	Illumina MiniSeq		GCA_003114895.1	GCF_003114895.1	yes	NC_000015.10	98.429	573	0	1009	bacteria
NZ_BFCK01000552.1:1-137	Sat	NZ_BFCK01000552.1	ALR	135	1022	137	1	1.9e-34	126.5	6.6	Proteus mirabilis strain MH13-009N, whole genome shotgun sequence		ASM311489v1	Proteus mirabilis (enterobacteria)	strain=MH13-009N	584	SAMD00112926	PRJDB6655	National Institute of Infectious Diseases	2018-4-11	n/a	major	Contig	full	CLC Genomic Workbench v. 9.0	296.9x	Illumina MiniSeq		GCA_003114895.1	GCF_003114895.1	yes	NC_000007.14	100	137	1.14e-65	254	bacteria
NZ_BFCK01000552.1:139-307	Sat	NZ_BFCK01000552.1	ALR	168	1022	307	139	7.6e-45	160.4	10.8	Proteus mirabilis strain MH13-009N, whole genome shotgun sequence		ASM311489v1	Proteus mirabilis (enterobacteria)	strain=MH13-009N	584	SAMD00112926	PRJDB6655	National Institute of Infectious Diseases	2018-4-11	n/a	major	Contig	full	CLC Genomic Workbench v. 9.0	296.9x	Illumina MiniSeq		GCA_003114895.1	GCF_003114895.1	yes	NC_000007.14	97.041	169	5.21e-75	285	bacteria
NZ_BFCK01000552.1:309-476	Sat	NZ_BFCK01000552.1	ALR	169	1022	476	309	1.7e-40	146.2	5.5	Proteus mirabilis strain MH13-009N, whole genome shotgun sequence		ASM311489v1	Proteus mirabilis (enterobacteria)	strain=MH13-009N	584	SAMD00112926	PRJDB6655	National Institute of Infectious Diseases	2018-4-11	n/a	major	Contig	full	CLC Genomic Workbench v. 9.0	296.9x	Illumina MiniSeq		GCA_003114895.1	GCF_003114895.1	yes	NC_000001.11	98.817	169	1.85e-79	300	bacteria
NZ_BFCK01000552.1:479-647	Sat	NZ_BFCK01000552.1	ALR	168	1022	647	479	4.2e-41	148.2	7.7	Proteus mirabilis strain MH13-009N, whole genome shotgun sequence		ASM311489v1	Proteus mirabilis (enterobacteria)	strain=MH13-009N	584	SAMD00112926	PRJDB6655	National Institute of Infectious Diseases	2018-4-11	n/a	major	Contig	full	CLC Genomic Workbench v. 9.0	296.9x	Illumina MiniSeq		GCA_003114895.1	GCF_003114895.1	yes	NC_000007.14	100	169	2.39e-83	313	bacteria
NZ_BFCK01000552.1:649-817	Sat	NZ_BFCK01000552.1	ALR	170	1022	817	649	1.3e-38	140.1	6.5	Proteus mirabilis strain MH13-009N, whole genome shotgun sequence		ASM311489v1	Proteus mirabilis (enterobacteria)	strain=MH13-009N	584	SAMD00112926	PRJDB6655	National Institute of Infectious Diseases	2018-4-11	n/a	major	Contig	full	CLC Genomic Workbench v. 9.0	296.9x	Illumina MiniSeq		GCA_003114895.1	GCF_003114895.1	yes	NC_000007.14	100	169	2.39e-83	313	bacteria
NZ_BFCK01000552.1:819-987	Sat	NZ_BFCK01000552.1	ALR	167	1022	987	819	2.6e-37	135.9	8.2	Proteus mirabilis strain MH13-009N, whole genome shotgun sequence		ASM311489v1	Proteus mirabilis (enterobacteria)	strain=MH13-009N	584	SAMD00112926	PRJDB6655	National Institute of Infectious Diseases	2018-4-11	n/a	major	Contig	full	CLC Genomic Workbench v. 9.0	296.9x	Illumina MiniSeq		GCA_003114895.1	GCF_003114895.1	yes	NC_000007.14	100	169	2.39e-83	313	bacteria
NZ_BFCK01000553.1:157-325	Sat	NZ_BFCK01000553.1	ALR	168	642	325	157	3.6e-39	141.9	6	Proteus mirabilis strain MH13-009N, whole genome shotgun sequence		ASM311489v1	Proteus mirabilis (enterobacteria)	strain=MH13-009N	584	SAMD00112926	PRJDB6655	National Institute of Infectious Diseases	2018-4-11	n/a	major	Contig	full	CLC Genomic Workbench v. 9.0	296.9x	Illumina MiniSeq		GCA_003114895.1	GCF_003114895.1	yes	NC_000001.11	100	169	2.39e-83	313	bacteria
NZ_BFCK01000553.1:2-155	Sat	NZ_BFCK01000553.1	ALR	153	642	155	2	5.3e-30	112.1	6.6	Proteus mirabilis strain MH13-009N, whole genome shotgun sequence		ASM311489v1	Proteus mirabilis (enterobacteria)	strain=MH13-009N	584	SAMD00112926	PRJDB6655	National Institute of Infectious Diseases	2018-4-11	n/a	major	Contig	full	CLC Genomic Workbench v. 9.0	296.9x	Illumina MiniSeq		GCA_003114895.1	GCF_003114895.1	yes	NC_000001.11	100	154	4.65e-75	285	bacteria
NZ_BFCK01000553.1:327-495	Sat	NZ_BFCK01000553.1	ALR	170	642	495	327	1.1e-37	137.1	7.8	Proteus mirabilis strain MH13-009N, whole genome shotgun sequence		ASM311489v1	Proteus mirabilis (enterobacteria)	strain=MH13-009N	584	SAMD00112926	PRJDB6655	National Institute of Infectious Diseases	2018-4-11	n/a	major	Contig	full	CLC Genomic Workbench v. 9.0	296.9x	Illumina MiniSeq		GCA_003114895.1	GCF_003114895.1	yes	NC_000001.11	99.408	169	1.11e-81	307	bacteria
NZ_BFCK01000553.1:497-642	Sat	NZ_BFCK01000553.1	ALR	145	642	642	497	2.9e-36	132.5	8.6	Proteus mirabilis strain MH13-009N, whole genome shotgun sequence		ASM311489v1	Proteus mirabilis (enterobacteria)	strain=MH13-009N	584	SAMD00112926	PRJDB6655	National Institute of Infectious Diseases	2018-4-11	n/a	major	Contig	full	CLC Genomic Workbench v. 9.0	296.9x	Illumina MiniSeq		GCA_003114895.1	GCF_003114895.1	yes	NC_000001.11	99.315	146	5.68e-69	265	bacteria
NZ_BFCK01000577.1:10-179	HSATII	NZ_BFCK01000577.1	HSATII	165	518	10	179	9.5e-40	143.1	17.7	Proteus mirabilis strain MH13-009N, whole genome shotgun sequence		ASM311489v1	Proteus mirabilis (enterobacteria)	strain=MH13-009N	584	SAMD00112926	PRJDB6655	National Institute of Infectious Diseases	2018-4-11	n/a	major	Contig	full	CLC Genomic Workbench v. 9.0	296.9x	Illumina MiniSeq		GCA_003114895.1	GCF_003114895.1	yes	NC_000016.10	97.436	156	1.9e-69	267	bacteria
NZ_BFCK01000577.1:274-443	HSATII	NZ_BFCK01000577.1	HSATII	169	518	274	443	1.4e-36	132.8	18.8	Proteus mirabilis strain MH13-009N, whole genome shotgun sequence		ASM311489v1	Proteus mirabilis (enterobacteria)	strain=MH13-009N	584	SAMD00112926	PRJDB6655	National Institute of Infectious Diseases	2018-4-11	n/a	major	Contig	full	CLC Genomic Workbench v. 9.0	296.9x	Illumina MiniSeq		GCA_003114895.1	GCF_003114895.1	yes	NC_000016.10	98.235	170	6.74e-79	298	bacteria
NZ_BFCK01000578.1:1-427	LINE	NZ_BFCK01000578.1	L1HS_5end	425	427	1	427	3.6e-154	520.1	16.4	Proteus mirabilis strain MH13-009N, whole genome shotgun sequence		ASM311489v1	Proteus mirabilis (enterobacteria)	strain=MH13-009N	584	SAMD00112926	PRJDB6655	National Institute of Infectious Diseases	2018-4-11	n/a	major	Contig	full	CLC Genomic Workbench v. 9.0	296.9x	Illumina MiniSeq		GCA_003114895.1	GCF_003114895.1	yes	NC_000002.12	98.122	426	0	743	bacteria
NZ_BFCK01000592.1:1-539	LINE	NZ_BFCK01000592.1	L1HS_3end	538	539	539	1	5.3e-201	675.8	23.7	Proteus mirabilis strain MH13-009N, whole genome shotgun sequence	WP_109024064.1	ASM311489v1	Proteus mirabilis (enterobacteria)	strain=MH13-009N	584	SAMD00112926	PRJDB6655	National Institute of Infectious Diseases	2018-4-11	n/a	major	Contig	full	CLC Genomic Workbench v. 9.0	296.9x	Illumina MiniSeq		GCA_003114895.1	GCF_003114895.1	yes	NC_000010.11	99.072	539	0	968	bacteria
NZ_BFCK01000605.1:1-253	Alu	NZ_BFCK01000605.1	AluSg	237	314	1	253	3.7e-80	276.2	9.5	Proteus mirabilis strain MH13-009N, whole genome shotgun sequence		ASM311489v1	Proteus mirabilis (enterobacteria)	strain=MH13-009N	584	SAMD00112926	PRJDB6655	National Institute of Infectious Diseases	2018-4-11	n/a	major	Contig	full	CLC Genomic Workbench v. 9.0	296.9x	Illumina MiniSeq		GCA_003114895.1	GCF_003114895.1	yes	NC_000015.10	94.779	249	6.13e-106	388	bacteria
NZ_BFCK01000611.1:1-78	Sat	NZ_BFCK01000611.1	ALR	77	773	1	78	3.3e-12	54.1	1.2	Proteus mirabilis strain MH13-009N, whole genome shotgun sequence		ASM311489v1	Proteus mirabilis (enterobacteria)	strain=MH13-009N	584	SAMD00112926	PRJDB6655	National Institute of Infectious Diseases	2018-4-11	n/a	major	Contig	full	CLC Genomic Workbench v. 9.0	296.9x	Illumina MiniSeq		GCA_003114895.1	GCF_003114895.1	yes	NC_000017.11	100	78	3.34e-33	145	bacteria
NZ_BFCK01000611.1:250-420	Sat	NZ_BFCK01000611.1	ALR	170	773	250	420	1.5e-44	159.5	8.4	Proteus mirabilis strain MH13-009N, whole genome shotgun sequence		ASM311489v1	Proteus mirabilis (enterobacteria)	strain=MH13-009N	584	SAMD00112926	PRJDB6655	National Institute of Infectious Diseases	2018-4-11	n/a	major	Contig	full	CLC Genomic Workbench v. 9.0	296.9x	Illumina MiniSeq		GCA_003114895.1	GCF_003114895.1	yes	NC_000017.11	98.83	171	4.05e-81	305	bacteria
NZ_BFCK01000611.1:421-591	Sat	NZ_BFCK01000611.1	ALR	170	773	421	591	2e-53	188.4	7.6	Proteus mirabilis strain MH13-009N, whole genome shotgun sequence		ASM311489v1	Proteus mirabilis (enterobacteria)	strain=MH13-009N	584	SAMD00112926	PRJDB6655	National Institute of Infectious Diseases	2018-4-11	n/a	major	Contig	full	CLC Genomic Workbench v. 9.0	296.9x	Illumina MiniSeq		GCA_003114895.1	GCF_003114895.1	yes	NC_000017.11	96.491	171	1.9e-74	283	bacteria
NZ_BFCK01000611.1:592-758	Sat	NZ_BFCK01000611.1	ALR	170	773	592	758	5.6e-38	138.1	5	Proteus mirabilis strain MH13-009N, whole genome shotgun sequence		ASM311489v1	Proteus mirabilis (enterobacteria)	strain=MH13-009N	584	SAMD00112926	PRJDB6655	National Institute of Infectious Diseases	2018-4-11	n/a	major	Contig	full	CLC Genomic Workbench v. 9.0	296.9x	Illumina MiniSeq		GCA_003114895.1	GCF_003114895.1	yes	NC_000017.11	98.802	167	6.6e-79	298	bacteria
NZ_BFCK01000611.1:79-249	Sat	NZ_BFCK01000611.1	ALR	168	773	79	249	6.1e-42	151	3.1	Proteus mirabilis strain MH13-009N, whole genome shotgun sequence		ASM311489v1	Proteus mirabilis (enterobacteria)	strain=MH13-009N	584	SAMD00112926	PRJDB6655	National Institute of Infectious Diseases	2018-4-11	n/a	major	Contig	full	CLC Genomic Workbench v. 9.0	296.9x	Illumina MiniSeq		GCA_003114895.1	GCF_003114895.1	yes	NC_000017.11	100	171	1.87e-84	316	bacteria
NZ_BFCK01000613.1:1-248	Alu	NZ_BFCK01000613.1	AluY	247	363	248	1	1.4e-85	294.1	10.4	Proteus mirabilis strain MH13-009N, whole genome shotgun sequence		ASM311489v1	Proteus mirabilis (enterobacteria)	strain=MH13-009N	584	SAMD00112926	PRJDB6655	National Institute of Infectious Diseases	2018-4-11	n/a	major	Contig	full	CLC Genomic Workbench v. 9.0	296.9x	Illumina MiniSeq		GCA_003114895.1	GCF_003114895.1	yes	NC_000003.12	95.968	248	2.14e-110	403	bacteria
NZ_BFCK01000616.1:81-248	Sat	NZ_BFCK01000616.1	ALR	164	332	248	81	3.1e-43	155.2	7.6	Proteus mirabilis strain MH13-009N, whole genome shotgun sequence		ASM311489v1	Proteus mirabilis (enterobacteria)	strain=MH13-009N	584	SAMD00112926	PRJDB6655	National Institute of Infectious Diseases	2018-4-11	n/a	major	Contig	full	CLC Genomic Workbench v. 9.0	296.9x	Illumina MiniSeq		GCA_003114895.1	GCF_003114895.1	yes	NC_000016.10	99.405	168	3.97e-81	305	bacteria
NZ_BFCK01000617.1:47-215	Sat	NZ_BFCK01000617.1	ALR	168	294	215	47	2.3e-42	152.4	6.9	Proteus mirabilis strain MH13-009N, whole genome shotgun sequence		ASM311489v1	Proteus mirabilis (enterobacteria)	strain=MH13-009N	584	SAMD00112926	PRJDB6655	National Institute of Infectious Diseases	2018-4-11	n/a	major	Contig	full	CLC Genomic Workbench v. 9.0	296.9x	Illumina MiniSeq		GCA_003114895.1	GCF_003114895.1	yes	NC_000001.11	100	169	2.39e-83	313	bacteria
NZ_BFCK01000622.1:1-124	Sat	NZ_BFCK01000622.1	ALR	122	1351	1	124	7.7e-29	108.3	1.8	Proteus mirabilis strain MH13-009N, whole genome shotgun sequence		ASM311489v1	Proteus mirabilis (enterobacteria)	strain=MH13-009N	584	SAMD00112926	PRJDB6655	National Institute of Infectious Diseases	2018-4-11	n/a	major	Contig	full	CLC Genomic Workbench v. 9.0	296.9x	Illumina MiniSeq		GCA_003114895.1	GCF_003114895.1	yes	NC_000013.11	100	124	1.69e-58	230	bacteria
NZ_BFCK01000622.1:1147-1317	Sat	NZ_BFCK01000622.1	ALR	170	1351	1147	1317	2.6e-40	145.7	12.8	Proteus mirabilis strain MH13-009N, whole genome shotgun sequence		ASM311489v1	Proteus mirabilis (enterobacteria)	strain=MH13-009N	584	SAMD00112926	PRJDB6655	National Institute of Infectious Diseases	2018-4-11	n/a	major	Contig	full	CLC Genomic Workbench v. 9.0	296.9x	Illumina MiniSeq		GCA_003114895.1	GCF_003114895.1	yes	NC_000013.11	100	171	1.87e-84	316	bacteria
NZ_BFCK01000622.1:125-295	Sat	NZ_BFCK01000622.1	ALR	170	1351	125	295	5.5e-45	160.9	8.4	Proteus mirabilis strain MH13-009N, whole genome shotgun sequence		ASM311489v1	Proteus mirabilis (enterobacteria)	strain=MH13-009N	584	SAMD00112926	PRJDB6655	National Institute of Infectious Diseases	2018-4-11	n/a	major	Contig	full	CLC Genomic Workbench v. 9.0	296.9x	Illumina MiniSeq		GCA_003114895.1	GCF_003114895.1	yes	NC_000013.11	98.83	171	4.05e-81	305	bacteria
NZ_BFCK01000622.1:296-466	Sat	NZ_BFCK01000622.1	ALR	170	1351	296	466	1.7e-39	143	2.9	Proteus mirabilis strain MH13-009N, whole genome shotgun sequence		ASM311489v1	Proteus mirabilis (enterobacteria)	strain=MH13-009N	584	SAMD00112926	PRJDB6655	National Institute of Infectious Diseases	2018-4-11	n/a	major	Contig	full	CLC Genomic Workbench v. 9.0	296.9x	Illumina MiniSeq		GCA_003114895.1	GCF_003114895.1	yes	NC_000013.11	100	171	1.87e-84	316	bacteria
NZ_BFCK01000622.1:467-637	Sat	NZ_BFCK01000622.1	ALR	170	1351	467	637	3.3e-44	158.4	12.4	Proteus mirabilis strain MH13-009N, whole genome shotgun sequence		ASM311489v1	Proteus mirabilis (enterobacteria)	strain=MH13-009N	584	SAMD00112926	PRJDB6655	National Institute of Infectious Diseases	2018-4-11	n/a	major	Contig	full	CLC Genomic Workbench v. 9.0	296.9x	Illumina MiniSeq		GCA_003114895.1	GCF_003114895.1	yes	NC_000013.11	99.415	171	8.71e-83	311	bacteria
NZ_BFCK01000622.1:638-808	Sat	NZ_BFCK01000622.1	ALR	170	1351	638	808	1.9e-48	172.2	4.5	Proteus mirabilis strain MH13-009N, whole genome shotgun sequence		ASM311489v1	Proteus mirabilis (enterobacteria)	strain=MH13-009N	584	SAMD00112926	PRJDB6655	National Institute of Infectious Diseases	2018-4-11	n/a	major	Contig	full	CLC Genomic Workbench v. 9.0	296.9x	Illumina MiniSeq		GCA_003114895.1	GCF_003114895.1	yes	NC_000013.11	99.415	171	8.71e-83	311	bacteria
NZ_BFCK01000622.1:809-975	Sat	NZ_BFCK01000622.1	ALR	170	1351	809	975	1.1e-35	130.6	7.7	Proteus mirabilis strain MH13-009N, whole genome shotgun sequence		ASM311489v1	Proteus mirabilis (enterobacteria)	strain=MH13-009N	584	SAMD00112926	PRJDB6655	National Institute of Infectious Diseases	2018-4-11	n/a	major	Contig	full	CLC Genomic Workbench v. 9.0	296.9x	Illumina MiniSeq		GCA_003114895.1	GCF_003114895.1	yes	NC_000013.11	99.401	167	1.42e-80	303	bacteria
NZ_BFCK01000622.1:976-1146	Sat	NZ_BFCK01000622.1	ALR	170	1351	976	1146	2.5e-44	158.8	7	Proteus mirabilis strain MH13-009N, whole genome shotgun sequence		ASM311489v1	Proteus mirabilis (enterobacteria)	strain=MH13-009N	584	SAMD00112926	PRJDB6655	National Institute of Infectious Diseases	2018-4-11	n/a	major	Contig	full	CLC Genomic Workbench v. 9.0	296.9x	Illumina MiniSeq		GCA_003114895.1	GCF_003114895.1	yes	NC_000013.11	100	171	1.87e-84	316	bacteria
NZ_BFCK01000623.1:1-72	Sat	NZ_BFCK01000623.1	ALR	71	508	72	1	4.7e-13	56.9	4.4	Proteus mirabilis strain MH13-009N, whole genome shotgun sequence	WP_109024069.1	ASM311489v1	Proteus mirabilis (enterobacteria)	strain=MH13-009N	584	SAMD00112926	PRJDB6655	National Institute of Infectious Diseases	2018-4-11	n/a	major	Contig	full	CLC Genomic Workbench v. 9.0	296.9x	Illumina MiniSeq		GCA_003114895.1	GCF_003114895.1	yes	NC_000010.11	100	72	6.37e-30	134	bacteria
NZ_BFCK01000623.1:244-412	Sat	NZ_BFCK01000623.1	ALR	168	508	412	244	5e-41	148	7.5	Proteus mirabilis strain MH13-009N, whole genome shotgun sequence	WP_109024069.1	ASM311489v1	Proteus mirabilis (enterobacteria)	strain=MH13-009N	584	SAMD00112926	PRJDB6655	National Institute of Infectious Diseases	2018-4-11	n/a	major	Contig	full	CLC Genomic Workbench v. 9.0	296.9x	Illumina MiniSeq		GCA_003114895.1	GCF_003114895.1	yes	NC_000010.11	100	169	2.39e-83	313	bacteria
NZ_BFCK01000623.1:414-508	Sat	NZ_BFCK01000623.1	ALR	96	508	508	414	6.7e-11	49.8	1.6	Proteus mirabilis strain MH13-009N, whole genome shotgun sequence	WP_109024069.1	ASM311489v1	Proteus mirabilis (enterobacteria)	strain=MH13-009N	584	SAMD00112926	PRJDB6655	National Institute of Infectious Diseases	2018-4-11	n/a	major	Contig	full	CLC Genomic Workbench v. 9.0	296.9x	Illumina MiniSeq		GCA_003114895.1	GCF_003114895.1	yes	NC_000010.11	98.947	95	7.34e-41	171	bacteria
NZ_BFCK01000623.1:74-242	Sat	NZ_BFCK01000623.1	ALR	170	508	242	74	5.3e-38	138.1	6.8	Proteus mirabilis strain MH13-009N, whole genome shotgun sequence	WP_109024069.1	ASM311489v1	Proteus mirabilis (enterobacteria)	strain=MH13-009N	584	SAMD00112926	PRJDB6655	National Institute of Infectious Diseases	2018-4-11	n/a	major	Contig	full	CLC Genomic Workbench v. 9.0	296.9x	Illumina MiniSeq		GCA_003114895.1	GCF_003114895.1	yes	NC_000010.11	100	169	2.39e-83	313	bacteria
NZ_BFCK01000631.1:1-1499	LINE	NZ_BFCK01000631.1	L1P1_orf2	1498	1499	1499	1	0	1916.1	114.1	Proteus mirabilis strain MH13-009N, whole genome shotgun sequence		ASM311489v1	Proteus mirabilis (enterobacteria)	strain=MH13-009N	584	SAMD00112926	PRJDB6655	National Institute of Infectious Diseases	2018-4-11	n/a	major	Contig	full	CLC Genomic Workbench v. 9.0	296.9x	Illumina MiniSeq		GCA_003114895.1	GCF_003114895.1	yes	NC_000004.12	98.332	1499	0	2630	bacteria
NZ_BFCK01000640.1:1-89	Sat	NZ_BFCK01000640.1	ALR	88	346	1	89	1.5e-14	61.8	3.7	Proteus mirabilis strain MH13-009N, whole genome shotgun sequence		ASM311489v1	Proteus mirabilis (enterobacteria)	strain=MH13-009N	584	SAMD00112926	PRJDB6655	National Institute of Infectious Diseases	2018-4-11	n/a	major	Contig	full	CLC Genomic Workbench v. 9.0	296.9x	Illumina MiniSeq		GCA_003114895.1	GCF_003114895.1	yes	NC_000006.12	100	89	3.11e-39	165	bacteria
NZ_BFCK01000640.1:261-346	Sat	NZ_BFCK01000640.1	ALR	85	346	261	346	1.4e-19	78.1	2.2	Proteus mirabilis strain MH13-009N, whole genome shotgun sequence		ASM311489v1	Proteus mirabilis (enterobacteria)	strain=MH13-009N	584	SAMD00112926	PRJDB6655	National Institute of Infectious Diseases	2018-4-11	n/a	major	Contig	full	CLC Genomic Workbench v. 9.0	296.9x	Illumina MiniSeq		GCA_003114895.1	GCF_003114895.1	yes	NC_000006.12	100	86	1.38e-37	159	bacteria
NZ_BFCK01000640.1:91-260	Sat	NZ_BFCK01000640.1	ALR	168	346	91	260	6.3e-41	147.7	7.7	Proteus mirabilis strain MH13-009N, whole genome shotgun sequence		ASM311489v1	Proteus mirabilis (enterobacteria)	strain=MH13-009N	584	SAMD00112926	PRJDB6655	National Institute of Infectious Diseases	2018-4-11	n/a	major	Contig	full	CLC Genomic Workbench v. 9.0	296.9x	Illumina MiniSeq		GCA_003114895.1	GCF_003114895.1	yes	NC_000006.12	100	170	6.69e-84	315	bacteria
NZ_BFCK01000656.1:1-314	LINE	NZ_BFCK01000656.1	L2	309	476	1	314	6.2e-21	76.7	32.3	Proteus mirabilis strain MH13-009N, whole genome shotgun sequence		ASM311489v1	Proteus mirabilis (enterobacteria)	strain=MH13-009N	584	SAMD00112926	PRJDB6655	National Institute of Infectious Diseases	2018-4-11	n/a	major	Contig	full	CLC Genomic Workbench v. 9.0	296.9x	Illumina MiniSeq		GCA_003114895.1	GCF_003114895.1	yes	NC_000012.12	99.363	314	2.6e-160	569	bacteria
NZ_BFCK01000657.1:270-336	Alu	NZ_BFCK01000657.1	AluJo	65	336	270	336	1.9e-12	53.4	1.4	Proteus mirabilis strain MH13-009N, whole genome shotgun sequence		ASM311489v1	Proteus mirabilis (enterobacteria)	strain=MH13-009N	584	SAMD00112926	PRJDB6655	National Institute of Infectious Diseases	2018-4-11	n/a	major	Contig	full	CLC Genomic Workbench v. 9.0	296.9x	Illumina MiniSeq		GCA_003114895.1	GCF_003114895.1	yes	NC_000005.10	100	67	3.41e-27	124	bacteria
NZ_BFCK01000662.1:1-140	HSATII	NZ_BFCK01000662.1	HSATII	139	641	1	140	4.6e-41	147.4	10.9	Proteus mirabilis strain MH13-009N, whole genome shotgun sequence		ASM311489v1	Proteus mirabilis (enterobacteria)	strain=MH13-009N	584	SAMD00112926	PRJDB6655	National Institute of Infectious Diseases	2018-4-11	n/a	major	Contig	full	CLC Genomic Workbench v. 9.0	296.9x	Illumina MiniSeq		GCA_003114895.1	GCF_003114895.1	yes	NC_000016.10	96.403	139	1.97e-58	230	bacteria
NZ_BFCK01000662.1:233-380	HSATII	NZ_BFCK01000662.1	HSATII	143	641	233	380	5.4e-33	121.1	19.3	Proteus mirabilis strain MH13-009N, whole genome shotgun sequence		ASM311489v1	Proteus mirabilis (enterobacteria)	strain=MH13-009N	584	SAMD00112926	PRJDB6655	National Institute of Infectious Diseases	2018-4-11	n/a	major	Contig	full	CLC Genomic Workbench v. 9.0	296.9x	Illumina MiniSeq		GCA_003114895.1	GCF_003114895.1	yes	NC_000016.10	98.649	148	2.08e-68	263	bacteria
NZ_BFCK01000662.1:384-552	HSATII	NZ_BFCK01000662.1	HSATII	168	641	384	552	1.9e-39	142.1	12.2	Proteus mirabilis strain MH13-009N, whole genome shotgun sequence		ASM311489v1	Proteus mirabilis (enterobacteria)	strain=MH13-009N	584	SAMD00112926	PRJDB6655	National Institute of Infectious Diseases	2018-4-11	n/a	major	Contig	full	CLC Genomic Workbench v. 9.0	296.9x	Illumina MiniSeq		GCA_003114895.1	GCF_003114895.1	yes	NC_000016.10	98.817	169	5.17e-80	302	bacteria
NZ_BFCK01000668.1:1-171	HSATII	NZ_BFCK01000668.1	HSATII	168	448	1	171	8.4e-39	140	16	Proteus mirabilis strain MH13-009N, whole genome shotgun sequence		ASM311489v1	Proteus mirabilis (enterobacteria)	strain=MH13-009N	584	SAMD00112926	PRJDB6655	National Institute of Infectious Diseases	2018-4-11	n/a	major	Contig	full	CLC Genomic Workbench v. 9.0	296.9x	Illumina MiniSeq		GCA_003114895.1	GCF_003114895.1	yes	NC_000001.11	99.415	171	8.71e-83	311	bacteria
NZ_BFCK01000668.1:299-448	HSATII	NZ_BFCK01000668.1	HSATII	151	448	299	448	7.1e-30	110.9	17.5	Proteus mirabilis strain MH13-009N, whole genome shotgun sequence		ASM311489v1	Proteus mirabilis (enterobacteria)	strain=MH13-009N	584	SAMD00112926	PRJDB6655	National Institute of Infectious Diseases	2018-4-11	n/a	major	Contig	full	CLC Genomic Workbench v. 9.0	296.9x	Illumina MiniSeq		GCA_003114895.1	GCF_003114895.1	yes	NC_000001.11	99.333	150	3.51e-71	272	bacteria
NZ_BFCK01000672.1:1-151	HSATII	NZ_BFCK01000672.1	HSATII	139	494	1	151	1.3e-13	58	27.7	Proteus mirabilis strain MH13-009N, whole genome shotgun sequence	WP_109024078.1	ASM311489v1	Proteus mirabilis (enterobacteria)	strain=MH13-009N	584	SAMD00112926	PRJDB6655	National Institute of Infectious Diseases	2018-4-11	n/a	major	Contig	full	CLC Genomic Workbench v. 9.0	296.9x	Illumina MiniSeq		GCA_003114895.1	GCF_003114895.1	yes	NC_000002.12	91.391	151	1.01e-51	207	bacteria
NZ_BFCK01000672.1:219-404	HSATII	NZ_BFCK01000672.1	HSATII	163	494	219	404	8.7e-18	71.6	28.6	Proteus mirabilis strain MH13-009N, whole genome shotgun sequence	WP_109024078.1	ASM311489v1	Proteus mirabilis (enterobacteria)	strain=MH13-009N	584	SAMD00112926	PRJDB6655	National Institute of Infectious Diseases	2018-4-11	n/a	major	Contig	full	CLC Genomic Workbench v. 9.0	296.9x	Illumina MiniSeq		GCA_003114895.1	GCF_003114895.1	yes	NC_000004.12	89.785	186	5.96e-60	235	bacteria
NZ_BFCK01000675.1:98-321	HSATII	NZ_BFCK01000675.1	HSATII	161	429	98	321	1.4e-14	61.1	19.6	Proteus mirabilis strain MH13-009N, whole genome shotgun sequence		ASM311489v1	Proteus mirabilis (enterobacteria)	strain=MH13-009N	584	SAMD00112926	PRJDB6655	National Institute of Infectious Diseases	2018-4-11	n/a	major	Contig	full	CLC Genomic Workbench v. 9.0	296.9x	Illumina MiniSeq		GCA_003114895.1	GCF_003114895.1	yes	NC_000024.10	99.554	224	4.12e-112	409	bacteria
NZ_BFCK01000680.1:1-153	HSATII	NZ_BFCK01000680.1	HSATII	152	461	153	1	1.6e-35	129.3	13.8	Proteus mirabilis strain MH13-009N, whole genome shotgun sequence		ASM311489v1	Proteus mirabilis (enterobacteria)	strain=MH13-009N	584	SAMD00112926	PRJDB6655	National Institute of Infectious Diseases	2018-4-11	n/a	major	Contig	full	CLC Genomic Workbench v. 9.0	296.9x	Illumina MiniSeq		GCA_003114895.1	GCF_003114895.1	yes	NC_000016.10	100	153	1.66e-74	283	bacteria
NZ_BFCK01000680.1:309-461	HSATII	NZ_BFCK01000680.1	HSATII	141	461	461	309	9.4e-30	110.5	16.2	Proteus mirabilis strain MH13-009N, whole genome shotgun sequence		ASM311489v1	Proteus mirabilis (enterobacteria)	strain=MH13-009N	584	SAMD00112926	PRJDB6655	National Institute of Infectious Diseases	2018-4-11	n/a	major	Contig	full	CLC Genomic Workbench v. 9.0	296.9x	Illumina MiniSeq		GCA_003114895.1	GCF_003114895.1	yes	NC_000016.10	98.667	150	1.67e-69	267	bacteria
NZ_BFCK01000684.1:1-86	Sat	NZ_BFCK01000684.1	ALR	85	472	1	86	1.3e-14	61.9	7	Proteus mirabilis strain MH13-009N, whole genome shotgun sequence		ASM311489v1	Proteus mirabilis (enterobacteria)	strain=MH13-009N	584	SAMD00112926	PRJDB6655	National Institute of Infectious Diseases	2018-4-11	n/a	major	Contig	full	CLC Genomic Workbench v. 9.0	296.9x	Illumina MiniSeq		GCA_003114895.1	GCF_003114895.1	yes	NC_000001.11	96.512	86	1.39e-32	143	bacteria
NZ_BFCK01000684.1:258-426	Sat	NZ_BFCK01000684.1	ALR	168	472	258	426	2.5e-40	145.7	7.5	Proteus mirabilis strain MH13-009N, whole genome shotgun sequence		ASM311489v1	Proteus mirabilis (enterobacteria)	strain=MH13-009N	584	SAMD00112926	PRJDB6655	National Institute of Infectious Diseases	2018-4-11	n/a	major	Contig	full	CLC Genomic Workbench v. 9.0	296.9x	Illumina MiniSeq		GCA_003114895.1	GCF_003114895.1	yes	NC_000012.12	100	169	2.39e-83	313	bacteria
NZ_BFCK01000684.1:88-256	Sat	NZ_BFCK01000684.1	ALR	170	472	88	256	7.8e-40	144.1	6.6	Proteus mirabilis strain MH13-009N, whole genome shotgun sequence		ASM311489v1	Proteus mirabilis (enterobacteria)	strain=MH13-009N	584	SAMD00112926	PRJDB6655	National Institute of Infectious Diseases	2018-4-11	n/a	major	Contig	full	CLC Genomic Workbench v. 9.0	296.9x	Illumina MiniSeq		GCA_003114895.1	GCF_003114895.1	yes	NC_000012.12	100	169	2.39e-83	313	bacteria
NZ_BFCK01000686.1:1-171	LTR	NZ_BFCK01000686.1	MIRb	176	455	171	1	4.1e-19	76.1	10.6	Proteus mirabilis strain MH13-009N, whole genome shotgun sequence		ASM311489v1	Proteus mirabilis (enterobacteria)	strain=MH13-009N	584	SAMD00112926	PRJDB6655	National Institute of Infectious Diseases	2018-4-11	n/a	major	Contig	full	CLC Genomic Workbench v. 9.0	296.9x	Illumina MiniSeq		GCA_003114895.1	GCF_003114895.1	yes	NC_000002.12	100	171	1.87e-84	316	bacteria
NZ_BFCK01000688.1:40-384	LINE	NZ_BFCK01000688.1	L1P1_orf2	341	384	384	40	2.3e-38	134.9	27	Proteus mirabilis strain MH13-009N, whole genome shotgun sequence		ASM311489v1	Proteus mirabilis (enterobacteria)	strain=MH13-009N	584	SAMD00112926	PRJDB6655	National Institute of Infectious Diseases	2018-4-11	n/a	major	Contig	full	CLC Genomic Workbench v. 9.0	296.9x	Illumina MiniSeq		GCA_003114895.1	GCF_003114895.1	yes	NC_000003.12	99.42	345	1.68e-177	627	bacteria
NZ_BFCK01000694.1:254-422	HSATII	NZ_BFCK01000694.1	HSATII	163	683	422	254	1.2e-14	61.3	28.7	Proteus mirabilis strain MH13-009N, whole genome shotgun sequence		ASM311489v1	Proteus mirabilis (enterobacteria)	strain=MH13-009N	584	SAMD00112926	PRJDB6655	National Institute of Infectious Diseases	2018-4-11	n/a	major	Contig	full	CLC Genomic Workbench v. 9.0	296.9x	Illumina MiniSeq		GCA_003114895.1	GCF_003114895.1	yes	NC_000005.10	92.353	170	1.14e-61	241	bacteria
NZ_BFCK01000694.1:455-661	HSATII	NZ_BFCK01000694.1	HSATII	157	683	661	455	8.5e-17	68.3	36	Proteus mirabilis strain MH13-009N, whole genome shotgun sequence		ASM311489v1	Proteus mirabilis (enterobacteria)	strain=MH13-009N	584	SAMD00112926	PRJDB6655	National Institute of Infectious Diseases	2018-4-11	n/a	major	Contig	full	CLC Genomic Workbench v. 9.0	296.9x	Illumina MiniSeq		GCA_003114895.1	GCF_003114895.1	yes	NT_167211.2	91.542	201	1.11e-72	278	bacteria
NZ_BFCK01000698.1:1-241	Alu	NZ_BFCK01000698.1	AluSx	237	440	241	1	3.2e-82	282.9	7.8	Proteus mirabilis strain MH13-009N, whole genome shotgun sequence		ASM311489v1	Proteus mirabilis (enterobacteria)	strain=MH13-009N	584	SAMD00112926	PRJDB6655	National Institute of Infectious Diseases	2018-4-11	n/a	major	Contig	full	CLC Genomic Workbench v. 9.0	296.9x	Illumina MiniSeq		GCA_003114895.1	GCF_003114895.1	yes	NC_000001.11	95.436	241	2.7e-104	383	bacteria
NZ_BFCK01000701.1:190-359	Sat	NZ_BFCK01000701.1	ALR	169	454	359	190	5.1e-43	154.5	3.6	Proteus mirabilis strain MH13-009N, whole genome shotgun sequence		ASM311489v1	Proteus mirabilis (enterobacteria)	strain=MH13-009N	584	SAMD00112926	PRJDB6655	National Institute of Infectious Diseases	2018-4-11	n/a	major	Contig	full	CLC Genomic Workbench v. 9.0	296.9x	Illumina MiniSeq		GCA_003114895.1	GCF_003114895.1	yes	NC_000006.12	100	170	6.69e-84	315	bacteria
NZ_BFCK01000701.1:21-189	Sat	NZ_BFCK01000701.1	ALR	170	454	189	21	1.8e-35	129.9	2.1	Proteus mirabilis strain MH13-009N, whole genome shotgun sequence		ASM311489v1	Proteus mirabilis (enterobacteria)	strain=MH13-009N	584	SAMD00112926	PRJDB6655	National Institute of Infectious Diseases	2018-4-11	n/a	major	Contig	full	CLC Genomic Workbench v. 9.0	296.9x	Illumina MiniSeq		GCA_003114895.1	GCF_003114895.1	yes	NC_000006.12	100	169	2.39e-83	313	bacteria
NZ_BFCK01000701.1:361-454	Sat	NZ_BFCK01000701.1	ALR	95	454	454	361	7.2e-16	66	4.3	Proteus mirabilis strain MH13-009N, whole genome shotgun sequence		ASM311489v1	Proteus mirabilis (enterobacteria)	strain=MH13-009N	584	SAMD00112926	PRJDB6655	National Institute of Infectious Diseases	2018-4-11	n/a	major	Contig	full	CLC Genomic Workbench v. 9.0	296.9x	Illumina MiniSeq		GCA_003114895.1	GCF_003114895.1	yes	NC_000006.12	100	94	5.59e-42	174	bacteria
NZ_BFCK01000702.1:1-87	Sat	NZ_BFCK01000702.1	ALR	85	551	87	1	6.6e-15	62.9	2.4	Proteus mirabilis strain MH13-009N, whole genome shotgun sequence		ASM311489v1	Proteus mirabilis (enterobacteria)	strain=MH13-009N	584	SAMD00112926	PRJDB6655	National Institute of Infectious Diseases	2018-4-11	n/a	major	Contig	full	CLC Genomic Workbench v. 9.0	296.9x	Illumina MiniSeq		GCA_003114895.1	GCF_003114895.1	yes	NC_000006.12	100	87	3.9e-38	161	bacteria
NZ_BFCK01000702.1:258-424	Sat	NZ_BFCK01000702.1	ALR	169	551	424	258	6.1e-37	134.7	3.2	Proteus mirabilis strain MH13-009N, whole genome shotgun sequence		ASM311489v1	Proteus mirabilis (enterobacteria)	strain=MH13-009N	584	SAMD00112926	PRJDB6655	National Institute of Infectious Diseases	2018-4-11	n/a	major	Contig	full	CLC Genomic Workbench v. 9.0	296.9x	Illumina MiniSeq		GCA_003114895.1	GCF_003114895.1	yes	NC_000006.12	100	167	3.05e-82	309	bacteria
NZ_BFCK01000702.1:426-551	Sat	NZ_BFCK01000702.1	ALR	127	551	551	426	1.5e-25	97.6	5.8	Proteus mirabilis strain MH13-009N, whole genome shotgun sequence		ASM311489v1	Proteus mirabilis (enterobacteria)	strain=MH13-009N	584	SAMD00112926	PRJDB6655	National Institute of Infectious Diseases	2018-4-11	n/a	major	Contig	full	CLC Genomic Workbench v. 9.0	296.9x	Illumina MiniSeq		GCA_003114895.1	GCF_003114895.1	yes	NC_000006.12	98.413	126	2.88e-56	222	bacteria
NZ_BFCK01000702.1:89-257	Sat	NZ_BFCK01000702.1	ALR	170	551	257	89	5.8e-39	141.3	2.5	Proteus mirabilis strain MH13-009N, whole genome shotgun sequence		ASM311489v1	Proteus mirabilis (enterobacteria)	strain=MH13-009N	584	SAMD00112926	PRJDB6655	National Institute of Infectious Diseases	2018-4-11	n/a	major	Contig	full	CLC Genomic Workbench v. 9.0	296.9x	Illumina MiniSeq		GCA_003114895.1	GCF_003114895.1	yes	NC_000006.12	99.408	169	1.11e-81	307	bacteria
NZ_BFCK01000710.1:235-401	Sat	NZ_BFCK01000710.1	ALR	168	486	235	401	4.6e-30	112.3	3.6	Proteus mirabilis strain MH13-009N, whole genome shotgun sequence		ASM311489v1	Proteus mirabilis (enterobacteria)	strain=MH13-009N	584	SAMD00112926	PRJDB6655	National Institute of Infectious Diseases	2018-4-11	n/a	major	Contig	full	CLC Genomic Workbench v. 9.0	296.9x	Illumina MiniSeq		GCA_003114895.1	GCF_003114895.1	yes	NC_000017.11	100	167	3.05e-82	309	bacteria
NZ_BFCK01000710.1:402-486	Sat	NZ_BFCK01000710.1	ALR	85	486	402	486	4.1e-13	57.1	7	Proteus mirabilis strain MH13-009N, whole genome shotgun sequence		ASM311489v1	Proteus mirabilis (enterobacteria)	strain=MH13-009N	584	SAMD00112926	PRJDB6655	National Institute of Infectious Diseases	2018-4-11	n/a	major	Contig	full	CLC Genomic Workbench v. 9.0	296.9x	Illumina MiniSeq		GCA_003114895.1	GCF_003114895.1	yes	NC_000017.11	100	85	4.87e-37	158	bacteria
NZ_BFCK01000710.1:65-234	Sat	NZ_BFCK01000710.1	ALR	170	486	65	234	7.9e-41	147.3	5.3	Proteus mirabilis strain MH13-009N, whole genome shotgun sequence		ASM311489v1	Proteus mirabilis (enterobacteria)	strain=MH13-009N	584	SAMD00112926	PRJDB6655	National Institute of Infectious Diseases	2018-4-11	n/a	major	Contig	full	CLC Genomic Workbench v. 9.0	296.9x	Illumina MiniSeq		GCA_003114895.1	GCF_003114895.1	yes	NC_000017.11	99.412	170	3.11e-82	309	bacteria
NZ_BFCK01000711.1:1-404	LINE	NZ_BFCK01000711.1	L1P1_orf2	402	404	1	404	2.5e-135	456.7	69.5	Proteus mirabilis strain MH13-009N, whole genome shotgun sequence		ASM311489v1	Proteus mirabilis (enterobacteria)	strain=MH13-009N	584	SAMD00112926	PRJDB6655	National Institute of Infectious Diseases	2018-4-11	n/a	major	Contig	full	CLC Genomic Workbench v. 9.0	296.9x	Illumina MiniSeq		GCA_003114895.1	GCF_003114895.1	yes	NC_000023.11	99.257	404	0	730	bacteria
NZ_BFCK01000714.1:190-315	Sat	NZ_BFCK01000714.1	BSR	123	315	315	190	2e-22	87	1.6	Proteus mirabilis strain MH13-009N, whole genome shotgun sequence		ASM311489v1	Proteus mirabilis (enterobacteria)	strain=MH13-009N	584	SAMD00112926	PRJDB6655	National Institute of Infectious Diseases	2018-4-11	n/a	major	Contig	full	CLC Genomic Workbench v. 9.0	296.9x	Illumina MiniSeq		GCA_003114895.1	GCF_003114895.1	yes	NT_167211.2	92.063	126	6.32e-43	178	bacteria
NZ_BFCK01000714.1:53-189	Sat	NZ_BFCK01000714.1	BSR	135	315	189	53	3.4e-44	157.5	1.9	Proteus mirabilis strain MH13-009N, whole genome shotgun sequence		ASM311489v1	Proteus mirabilis (enterobacteria)	strain=MH13-009N	584	SAMD00112926	PRJDB6655	National Institute of Infectious Diseases	2018-4-11	n/a	major	Contig	full	CLC Genomic Workbench v. 9.0	296.9x	Illumina MiniSeq		GCA_003114895.1	GCF_003114895.1	yes	NC_000024.10	95.652	138	1.15e-55	220	bacteria
NZ_BFCK01000715.1:167-325	Alu	NZ_BFCK01000715.1	AluJo	153	325	325	167	4.1e-43	154.1	7.4	Proteus mirabilis strain MH13-009N, whole genome shotgun sequence		ASM311489v1	Proteus mirabilis (enterobacteria)	strain=MH13-009N	584	SAMD00112926	PRJDB6655	National Institute of Infectious Diseases	2018-4-11	n/a	major	Contig	full	CLC Genomic Workbench v. 9.0	296.9x	Illumina MiniSeq		GCA_003114895.1	GCF_003114895.1	yes	NC_000006.12	93.75	160	3.82e-61	239	bacteria
NZ_BFCK01000726.1:153-373	Alu	NZ_BFCK01000726.1	AluJo	207	373	373	153	4.1e-54	190.3	1.8	Proteus mirabilis strain MH13-009N, whole genome shotgun sequence		ASM311489v1	Proteus mirabilis (enterobacteria)	strain=MH13-009N	584	SAMD00112926	PRJDB6655	National Institute of Infectious Diseases	2018-4-11	n/a	major	Contig	full	CLC Genomic Workbench v. 9.0	296.9x	Illumina MiniSeq		GCA_003114895.1	GCF_003114895.1	yes	NC_000001.11	95.045	222	8.96e-94	348	bacteria
NZ_BFCK01000727.1:124-596	LINE	NZ_BFCK01000727.1	L1P1_orf2	472	596	124	596	1.6e-170	573.4	45	Proteus mirabilis strain MH13-009N, whole genome shotgun sequence		ASM311489v1	Proteus mirabilis (enterobacteria)	strain=MH13-009N	584	SAMD00112926	PRJDB6655	National Institute of Infectious Diseases	2018-4-11	n/a	major	Contig	full	CLC Genomic Workbench v. 9.0	296.9x	Illumina MiniSeq		GCA_003114895.1	GCF_003114895.1	yes	NC_000004.12	99.154	473	0	852	bacteria
NZ_BFCK01000736.1:1-158	HSATII	NZ_BFCK01000736.1	HSATII	160	550	158	1	2.6e-39	141.7	13.8	Proteus mirabilis strain MH13-009N, whole genome shotgun sequence		ASM311489v1	Proteus mirabilis (enterobacteria)	strain=MH13-009N	584	SAMD00112926	PRJDB6655	National Institute of Infectious Diseases	2018-4-11	n/a	major	Contig	full	CLC Genomic Workbench v. 9.0	296.9x	Illumina MiniSeq		GCA_003114895.1	GCF_003114895.1	yes	NC_000016.10	98.101	158	2.89e-72	276	bacteria
NZ_BFCK01000736.1:384-550	HSATII	NZ_BFCK01000736.1	HSATII	163	550	550	384	5.5e-39	140.6	11.3	Proteus mirabilis strain MH13-009N, whole genome shotgun sequence		ASM311489v1	Proteus mirabilis (enterobacteria)	strain=MH13-009N	584	SAMD00112926	PRJDB6655	National Institute of Infectious Diseases	2018-4-11	n/a	major	Contig	full	CLC Genomic Workbench v. 9.0	296.9x	Illumina MiniSeq		GCA_003114895.1	GCF_003114895.1	yes	NC_000016.10	100	167	3.05e-82	309	bacteria
NZ_BFCK01000742.1:239-315	Alu	NZ_BFCK01000742.1	AluJo	76	315	239	315	1.1e-15	64	4.3	Proteus mirabilis strain MH13-009N, whole genome shotgun sequence		ASM311489v1	Proteus mirabilis (enterobacteria)	strain=MH13-009N	584	SAMD00112926	PRJDB6655	National Institute of Infectious Diseases	2018-4-11	n/a	major	Contig	full	CLC Genomic Workbench v. 9.0	296.9x	Illumina MiniSeq		GCA_003114895.1	GCF_003114895.1	yes	NC_000011.10	97.403	77	2.55e-29	132	bacteria
NZ_BFCK01000743.1:234-402	Sat	NZ_BFCK01000743.1	ALR	168	570	402	234	1.4e-42	153.1	9.5	Proteus mirabilis strain MH13-009N, whole genome shotgun sequence		ASM311489v1	Proteus mirabilis (enterobacteria)	strain=MH13-009N	584	SAMD00112926	PRJDB6655	National Institute of Infectious Diseases	2018-4-11	n/a	major	Contig	full	CLC Genomic Workbench v. 9.0	296.9x	Illumina MiniSeq		GCA_003114895.1	GCF_003114895.1	yes	NC_000016.10	99.408	169	1.11e-81	307	bacteria
NZ_BFCK01000743.1:404-570	Sat	NZ_BFCK01000743.1	ALR	168	570	570	404	4.5e-32	118.8	7.9	Proteus mirabilis strain MH13-009N, whole genome shotgun sequence		ASM311489v1	Proteus mirabilis (enterobacteria)	strain=MH13-009N	584	SAMD00112926	PRJDB6655	National Institute of Infectious Diseases	2018-4-11	n/a	major	Contig	full	CLC Genomic Workbench v. 9.0	296.9x	Illumina MiniSeq		GCA_003114895.1	GCF_003114895.1	yes	NC_000016.10	96.894	161	1.44e-70	270	bacteria
NZ_BFCK01000743.1:64-232	Sat	NZ_BFCK01000743.1	ALR	168	570	232	64	1.2e-37	137	6.9	Proteus mirabilis strain MH13-009N, whole genome shotgun sequence		ASM311489v1	Proteus mirabilis (enterobacteria)	strain=MH13-009N	584	SAMD00112926	PRJDB6655	National Institute of Infectious Diseases	2018-4-11	n/a	major	Contig	full	CLC Genomic Workbench v. 9.0	296.9x	Illumina MiniSeq		GCA_003114895.1	GCF_003114895.1	yes	NC_000001.11	98.225	169	2.41e-78	296	bacteria
NZ_BFCK01000745.1:1-366	LINE	NZ_BFCK01000745.1	L1HS_5end	365	366	366	1	7.6e-128	432.8	29.4	Proteus mirabilis strain MH13-009N, whole genome shotgun sequence		ASM311489v1	Proteus mirabilis (enterobacteria)	strain=MH13-009N	584	SAMD00112926	PRJDB6655	National Institute of Infectious Diseases	2018-4-11	n/a	major	Contig	full	CLC Genomic Workbench v. 9.0	296.9x	Illumina MiniSeq		GCA_003114895.1	GCF_003114895.1	yes	NC_000007.14	99.727	366	0	671	bacteria
NZ_BFCK01000746.1:107-277	Sat	NZ_BFCK01000746.1	ALR	170	513	277	107	6.5e-51	180.2	4.7	Proteus mirabilis strain MH13-009N, whole genome shotgun sequence		ASM311489v1	Proteus mirabilis (enterobacteria)	strain=MH13-009N	584	SAMD00112926	PRJDB6655	National Institute of Infectious Diseases	2018-4-11	n/a	major	Contig	full	CLC Genomic Workbench v. 9.0	296.9x	Illumina MiniSeq		GCA_003114895.1	GCF_003114895.1	yes	NC_000009.12	97.076	171	4.08e-76	289	bacteria
NZ_BFCK01000746.1:1-106	Sat	NZ_BFCK01000746.1	ALR	105	513	106	1	3.5e-29	109.4	7.2	Proteus mirabilis strain MH13-009N, whole genome shotgun sequence		ASM311489v1	Proteus mirabilis (enterobacteria)	strain=MH13-009N	584	SAMD00112926	PRJDB6655	National Institute of Infectious Diseases	2018-4-11	n/a	major	Contig	full	CLC Genomic Workbench v. 9.0	296.9x	Illumina MiniSeq		GCA_003114895.1	GCF_003114895.1	yes	NC_000009.12	98.113	106	3.04e-45	185	bacteria
NZ_BFCK01000746.1:278-448	Sat	NZ_BFCK01000746.1	ALR	170	513	448	278	1.6e-36	133.3	11.2	Proteus mirabilis strain MH13-009N, whole genome shotgun sequence		ASM311489v1	Proteus mirabilis (enterobacteria)	strain=MH13-009N	584	SAMD00112926	PRJDB6655	National Institute of Infectious Diseases	2018-4-11	n/a	major	Contig	full	CLC Genomic Workbench v. 9.0	296.9x	Illumina MiniSeq		GCA_003114895.1	GCF_003114895.1	yes	NC_000009.12	98.83	171	4.05e-81	305	bacteria
NZ_BFCK01000747.1:77-392	Alu	NZ_BFCK01000747.1	AluY	304	410	77	392	3.3e-108	368.5	12.8	Proteus mirabilis strain MH13-009N, whole genome shotgun sequence		ASM311489v1	Proteus mirabilis (enterobacteria)	strain=MH13-009N	584	SAMD00112926	PRJDB6655	National Institute of Infectious Diseases	2018-4-11	n/a	major	Contig	full	CLC Genomic Workbench v. 9.0	296.9x	Illumina MiniSeq		GCA_003114895.1	GCF_003114895.1	yes	NC_000001.11	98.007	301	2.06e-146	523	bacteria
NZ_BFCK01000750.1:191-415	Alu	NZ_BFCK01000750.1	AluSx	225	415	191	415	9.8e-77	264.9	5.4	Proteus mirabilis strain MH13-009N, whole genome shotgun sequence		ASM311489v1	Proteus mirabilis (enterobacteria)	strain=MH13-009N	584	SAMD00112926	PRJDB6655	National Institute of Infectious Diseases	2018-4-11	n/a	major	Contig	full	CLC Genomic Workbench v. 9.0	296.9x	Illumina MiniSeq		GCA_003114895.1	GCF_003114895.1	yes	NC_000020.11	95.575	226	1.18e-97	361	bacteria
NZ_BFCK01000753.1:228-300	Sat	NZ_BFCK01000753.1	ALR	72	300	300	228	5.1e-11	50.2	4	Proteus mirabilis strain MH13-009N, whole genome shotgun sequence		ASM311489v1	Proteus mirabilis (enterobacteria)	strain=MH13-009N	584	SAMD00112926	PRJDB6655	National Institute of Infectious Diseases	2018-4-11	n/a	major	Contig	full	CLC Genomic Workbench v. 9.0	296.9x	Illumina MiniSeq		GCA_003114895.1	GCF_003114895.1	yes	NC_000017.11	100	73	1.81e-30	135	bacteria
NZ_BFCK01000753.1:59-227	Sat	NZ_BFCK01000753.1	ALR	170	300	227	59	4.6e-37	135.1	3.5	Proteus mirabilis strain MH13-009N, whole genome shotgun sequence		ASM311489v1	Proteus mirabilis (enterobacteria)	strain=MH13-009N	584	SAMD00112926	PRJDB6655	National Institute of Infectious Diseases	2018-4-11	n/a	major	Contig	full	CLC Genomic Workbench v. 9.0	296.9x	Illumina MiniSeq		GCA_003114895.1	GCF_003114895.1	yes	NC_000017.11	99.408	169	1.11e-81	307	bacteria
NZ_BFCK01000754.1:88-355	LTR	NZ_BFCK01000754.1	MSTB	294	357	88	355	5.5e-23	88	5.5	Proteus mirabilis strain MH13-009N, whole genome shotgun sequence		ASM311489v1	Proteus mirabilis (enterobacteria)	strain=MH13-009N	584	SAMD00112926	PRJDB6655	National Institute of Infectious Diseases	2018-4-11	n/a	major	Contig	full	CLC Genomic Workbench v. 9.0	296.9x	Illumina MiniSeq		GCA_003114895.1	GCF_003114895.1	yes	NC_000006.12	99.627	268	1.74e-136	490	bacteria
NZ_BFCK01000761.1:202-369	Sat	NZ_BFCK01000761.1	ALR	166	382	202	369	1.5e-35	130.1	5.5	Proteus mirabilis strain MH13-009N, whole genome shotgun sequence		ASM311489v1	Proteus mirabilis (enterobacteria)	strain=MH13-009N	584	SAMD00112926	PRJDB6655	National Institute of Infectious Diseases	2018-4-11	n/a	major	Contig	full	CLC Genomic Workbench v. 9.0	296.9x	Illumina MiniSeq		GCA_003114895.1	GCF_003114895.1	yes	NC_000023.11	100	168	8.53e-83	311	bacteria
NZ_BFCK01000761.1:32-201	Sat	NZ_BFCK01000761.1	ALR	169	382	32	201	1.1e-40	146.8	7	Proteus mirabilis strain MH13-009N, whole genome shotgun sequence		ASM311489v1	Proteus mirabilis (enterobacteria)	strain=MH13-009N	584	SAMD00112926	PRJDB6655	National Institute of Infectious Diseases	2018-4-11	n/a	major	Contig	full	CLC Genomic Workbench v. 9.0	296.9x	Illumina MiniSeq		GCA_003114895.1	GCF_003114895.1	yes	NC_000023.11	98.824	170	1.45e-80	303	bacteria
NZ_BFCK01000762.1:189-359	Sat	NZ_BFCK01000762.1	ALR	170	548	359	189	2.3e-40	145.9	7.2	Proteus mirabilis strain MH13-009N, whole genome shotgun sequence		ASM311489v1	Proteus mirabilis (enterobacteria)	strain=MH13-009N	584	SAMD00112926	PRJDB6655	National Institute of Infectious Diseases	2018-4-11	n/a	major	Contig	full	CLC Genomic Workbench v. 9.0	296.9x	Illumina MiniSeq		GCA_003114895.1	GCF_003114895.1	yes	NC_000023.11	100	171	1.87e-84	316	bacteria
NZ_BFCK01000762.1:3-188	Sat	NZ_BFCK01000762.1	ALR	170	548	188	3	2.9e-38	139	5.2	Proteus mirabilis strain MH13-009N, whole genome shotgun sequence		ASM311489v1	Proteus mirabilis (enterobacteria)	strain=MH13-009N	584	SAMD00112926	PRJDB6655	National Institute of Infectious Diseases	2018-4-11	n/a	major	Contig	full	CLC Genomic Workbench v. 9.0	296.9x	Illumina MiniSeq		GCA_003114895.1	GCF_003114895.1	yes	NC_000023.11	98.925	186	2.06e-89	333	bacteria
NZ_BFCK01000762.1:360-529	Sat	NZ_BFCK01000762.1	ALR	170	548	529	360	1.4e-35	130.3	3.4	Proteus mirabilis strain MH13-009N, whole genome shotgun sequence		ASM311489v1	Proteus mirabilis (enterobacteria)	strain=MH13-009N	584	SAMD00112926	PRJDB6655	National Institute of Infectious Diseases	2018-4-11	n/a	major	Contig	full	CLC Genomic Workbench v. 9.0	296.9x	Illumina MiniSeq		GCA_003114895.1	GCF_003114895.1	yes	NC_000023.11	100	170	6.69e-84	315	bacteria
NZ_BFCK01000768.1:64-372	Alu	NZ_BFCK01000768.1	AluSx	301	377	372	64	4.2e-105	358.1	8.1	Proteus mirabilis strain MH13-009N, whole genome shotgun sequence		ASM311489v1	Proteus mirabilis (enterobacteria)	strain=MH13-009N	584	SAMD00112926	PRJDB6655	National Institute of Infectious Diseases	2018-4-11	n/a	major	Contig	full	CLC Genomic Workbench v. 9.0	296.9x	Illumina MiniSeq		GCA_003114895.1	GCF_003114895.1	yes	NC_000016.10	93.939	297	3.47e-124	449	bacteria
NZ_BFCK01000774.1:107-277	Sat	NZ_BFCK01000774.1	ALR	170	466	277	107	6.1e-41	147.7	4.5	Proteus mirabilis strain MH13-009N, whole genome shotgun sequence		ASM311489v1	Proteus mirabilis (enterobacteria)	strain=MH13-009N	584	SAMD00112926	PRJDB6655	National Institute of Infectious Diseases	2018-4-11	n/a	major	Contig	full	CLC Genomic Workbench v. 9.0	296.9x	Illumina MiniSeq		GCA_003114895.1	GCF_003114895.1	yes	NC_000009.12	100	171	1.87e-84	316	bacteria
NZ_BFCK01000774.1:1-106	Sat	NZ_BFCK01000774.1	ALR	105	466	106	1	2e-28	106.9	9.7	Proteus mirabilis strain MH13-009N, whole genome shotgun sequence		ASM311489v1	Proteus mirabilis (enterobacteria)	strain=MH13-009N	584	SAMD00112926	PRJDB6655	National Institute of Infectious Diseases	2018-4-11	n/a	major	Contig	full	CLC Genomic Workbench v. 9.0	296.9x	Illumina MiniSeq		GCA_003114895.1	GCF_003114895.1	yes	NC_000009.12	98.113	106	3.04e-45	185	bacteria
NZ_BFCK01000774.1:278-448	Sat	NZ_BFCK01000774.1	ALR	170	466	448	278	4.1e-44	158	12.9	Proteus mirabilis strain MH13-009N, whole genome shotgun sequence		ASM311489v1	Proteus mirabilis (enterobacteria)	strain=MH13-009N	584	SAMD00112926	PRJDB6655	National Institute of Infectious Diseases	2018-4-11	n/a	major	Contig	full	CLC Genomic Workbench v. 9.0	296.9x	Illumina MiniSeq		GCA_003114895.1	GCF_003114895.1	yes	NC_000009.12	98.246	171	1.89e-79	300	bacteria
NZ_BFCK01000778.1:1-87	Sat	NZ_BFCK01000778.1	ALR	86	473	87	1	2.1e-17	71	3.5	Proteus mirabilis strain MH13-009N, whole genome shotgun sequence		ASM311489v1	Proteus mirabilis (enterobacteria)	strain=MH13-009N	584	SAMD00112926	PRJDB6655	National Institute of Infectious Diseases	2018-4-11	n/a	major	Contig	full	CLC Genomic Workbench v. 9.0	296.9x	Illumina MiniSeq		GCA_003114895.1	GCF_003114895.1	yes	NC_000018.10	97.701	87	8.44e-35	150	bacteria
NZ_BFCK01000778.1:259-425	Sat	NZ_BFCK01000778.1	ALR	170	473	425	259	8e-36	131	8.4	Proteus mirabilis strain MH13-009N, whole genome shotgun sequence		ASM311489v1	Proteus mirabilis (enterobacteria)	strain=MH13-009N	584	SAMD00112926	PRJDB6655	National Institute of Infectious Diseases	2018-4-11	n/a	major	Contig	full	CLC Genomic Workbench v. 9.0	296.9x	Illumina MiniSeq		GCA_003114895.1	GCF_003114895.1	yes	NC_000018.10	100	167	3.05e-82	309	bacteria
NZ_BFCK01000778.1:88-258	Sat	NZ_BFCK01000778.1	ALR	170	473	258	88	1.7e-48	172.4	5.5	Proteus mirabilis strain MH13-009N, whole genome shotgun sequence		ASM311489v1	Proteus mirabilis (enterobacteria)	strain=MH13-009N	584	SAMD00112926	PRJDB6655	National Institute of Infectious Diseases	2018-4-11	n/a	major	Contig	full	CLC Genomic Workbench v. 9.0	296.9x	Illumina MiniSeq		GCA_003114895.1	GCF_003114895.1	yes	NC_000018.10	98.83	171	4.05e-81	305	bacteria
NZ_BFCK01000780.1:213-381	Sat	NZ_BFCK01000780.1	ALR	170	578	381	213	1.2e-39	143.5	4.5	Proteus mirabilis strain MH13-009N, whole genome shotgun sequence		ASM311489v1	Proteus mirabilis (enterobacteria)	strain=MH13-009N	584	SAMD00112926	PRJDB6655	National Institute of Infectious Diseases	2018-4-11	n/a	major	Contig	full	CLC Genomic Workbench v. 9.0	296.9x	Illumina MiniSeq		GCA_003114895.1	GCF_003114895.1	yes	NC_000023.11	100	169	2.39e-83	313	bacteria
NZ_BFCK01000780.1:382-552	Sat	NZ_BFCK01000780.1	ALR	170	578	552	382	1.2e-42	153.3	4.3	Proteus mirabilis strain MH13-009N, whole genome shotgun sequence		ASM311489v1	Proteus mirabilis (enterobacteria)	strain=MH13-009N	584	SAMD00112926	PRJDB6655	National Institute of Infectious Diseases	2018-4-11	n/a	major	Contig	full	CLC Genomic Workbench v. 9.0	296.9x	Illumina MiniSeq		GCA_003114895.1	GCF_003114895.1	yes	NC_000023.11	100	171	1.87e-84	316	bacteria
NZ_BFCK01000780.1:42-212	Sat	NZ_BFCK01000780.1	ALR	170	578	212	42	2.9e-47	168.3	4.2	Proteus mirabilis strain MH13-009N, whole genome shotgun sequence		ASM311489v1	Proteus mirabilis (enterobacteria)	strain=MH13-009N	584	SAMD00112926	PRJDB6655	National Institute of Infectious Diseases	2018-4-11	n/a	major	Contig	full	CLC Genomic Workbench v. 9.0	296.9x	Illumina MiniSeq		GCA_003114895.1	GCF_003114895.1	yes	NC_000023.11	99.415	171	8.71e-83	311	bacteria
NZ_BFCK01000781.1:51-365	Alu	NZ_BFCK01000781.1	AluSz	307	398	51	365	5e-97	331.5	9.8	Proteus mirabilis strain MH13-009N, whole genome shotgun sequence		ASM311489v1	Proteus mirabilis (enterobacteria)	strain=MH13-009N	584	SAMD00112926	PRJDB6655	National Institute of Infectious Diseases	2018-4-11	n/a	major	Contig	full	CLC Genomic Workbench v. 9.0	296.9x	Illumina MiniSeq		GCA_003114895.1	GCF_003114895.1	yes	NC_000018.10	95.556	315	7.45e-141	505	bacteria
NZ_BFCK01000784.1:6-193	LTR	NZ_BFCK01000784.1	MSTB	186	394	6	193	1.3e-33	123	7.4	Proteus mirabilis strain MH13-009N, whole genome shotgun sequence		ASM311489v1	Proteus mirabilis (enterobacteria)	strain=MH13-009N	584	SAMD00112926	PRJDB6655	National Institute of Infectious Diseases	2018-4-11	n/a	major	Contig	full	CLC Genomic Workbench v. 9.0	296.9x	Illumina MiniSeq		GCA_003114895.1	GCF_003114895.1	yes	NC_000009.12	98.936	188	1.61e-90	337	bacteria
NZ_BFCK01000789.1:1-73	Sat	NZ_BFCK01000789.1	ALR	72	344	73	1	8.3e-12	52.8	2.3	Proteus mirabilis strain MH13-009N, whole genome shotgun sequence		ASM311489v1	Proteus mirabilis (enterobacteria)	strain=MH13-009N	584	SAMD00112926	PRJDB6655	National Institute of Infectious Diseases	2018-4-11	n/a	major	Contig	full	CLC Genomic Workbench v. 9.0	296.9x	Illumina MiniSeq		GCA_003114895.1	GCF_003114895.1	yes	NC_000023.11	100	73	1.81e-30	135	bacteria
NZ_BFCK01000789.1:245-344	Sat	NZ_BFCK01000789.1	ALR	99	344	344	245	1.4e-18	74.8	3.4	Proteus mirabilis strain MH13-009N, whole genome shotgun sequence		ASM311489v1	Proteus mirabilis (enterobacteria)	strain=MH13-009N	584	SAMD00112926	PRJDB6655	National Institute of Infectious Diseases	2018-4-11	n/a	major	Contig	full	CLC Genomic Workbench v. 9.0	296.9x	Illumina MiniSeq		GCA_003114895.1	GCF_003114895.1	yes	NC_000023.11	99	100	1.31e-43	180	bacteria
NZ_BFCK01000789.1:74-244	Sat	NZ_BFCK01000789.1	ALR	170	344	244	74	1.8e-49	175.5	6.4	Proteus mirabilis strain MH13-009N, whole genome shotgun sequence		ASM311489v1	Proteus mirabilis (enterobacteria)	strain=MH13-009N	584	SAMD00112926	PRJDB6655	National Institute of Infectious Diseases	2018-4-11	n/a	major	Contig	full	CLC Genomic Workbench v. 9.0	296.9x	Illumina MiniSeq		GCA_003114895.1	GCF_003114895.1	yes	NC_000023.11	98.83	171	4.05e-81	305	bacteria
NZ_BFCK01000790.1:220-385	Sat	NZ_BFCK01000790.1	ALR	167	634	220	385	2.6e-33	122.8	9.1	Proteus mirabilis strain MH13-009N, whole genome shotgun sequence		ASM311489v1	Proteus mirabilis (enterobacteria)	strain=MH13-009N	584	SAMD00112926	PRJDB6655	National Institute of Infectious Diseases	2018-4-11	n/a	major	Contig	full	CLC Genomic Workbench v. 9.0	296.9x	Illumina MiniSeq		GCA_003114895.1	GCF_003114895.1	yes	NC_000008.11	98.795	166	2.35e-78	296	bacteria
NZ_BFCK01000790.1:386-556	Sat	NZ_BFCK01000790.1	ALR	170	634	386	556	1.3e-43	156.4	3.4	Proteus mirabilis strain MH13-009N, whole genome shotgun sequence		ASM311489v1	Proteus mirabilis (enterobacteria)	strain=MH13-009N	584	SAMD00112926	PRJDB6655	National Institute of Infectious Diseases	2018-4-11	n/a	major	Contig	full	CLC Genomic Workbench v. 9.0	296.9x	Illumina MiniSeq		GCA_003114895.1	GCF_003114895.1	yes	NC_000008.11	99.415	171	8.71e-83	311	bacteria
NZ_BFCK01000790.1:48-218	Sat	NZ_BFCK01000790.1	ALR	170	634	48	218	1.4e-41	149.8	4.1	Proteus mirabilis strain MH13-009N, whole genome shotgun sequence		ASM311489v1	Proteus mirabilis (enterobacteria)	strain=MH13-009N	584	SAMD00112926	PRJDB6655	National Institute of Infectious Diseases	2018-4-11	n/a	major	Contig	full	CLC Genomic Workbench v. 9.0	296.9x	Illumina MiniSeq		GCA_003114895.1	GCF_003114895.1	yes	NC_000008.11	100	171	1.87e-84	316	bacteria
NZ_BFCK01000790.1:557-634	Sat	NZ_BFCK01000790.1	ALR	76	634	557	634	2.8e-11	51.1	3.7	Proteus mirabilis strain MH13-009N, whole genome shotgun sequence		ASM311489v1	Proteus mirabilis (enterobacteria)	strain=MH13-009N	584	SAMD00112926	PRJDB6655	National Institute of Infectious Diseases	2018-4-11	n/a	major	Contig	full	CLC Genomic Workbench v. 9.0	296.9x	Illumina MiniSeq		GCA_003114895.1	GCF_003114895.1	yes	NC_000008.11	98.718	78	1.55e-31	139	bacteria
NZ_BFCK01000791.1:232-401	Sat	NZ_BFCK01000791.1	ALR	170	513	232	401	1.5e-45	162.7	5.4	Proteus mirabilis strain MH13-009N, whole genome shotgun sequence		ASM311489v1	Proteus mirabilis (enterobacteria)	strain=MH13-009N	584	SAMD00112926	PRJDB6655	National Institute of Infectious Diseases	2018-4-11	n/a	major	Contig	full	CLC Genomic Workbench v. 9.0	296.9x	Illumina MiniSeq		GCA_003114895.1	GCF_003114895.1	yes	NC_000017.11	100	170	6.69e-84	315	bacteria
NZ_BFCK01000791.1:402-513	Sat	NZ_BFCK01000791.1	ALR	108	513	402	513	9.7e-28	104.7	3	Proteus mirabilis strain MH13-009N, whole genome shotgun sequence		ASM311489v1	Proteus mirabilis (enterobacteria)	strain=MH13-009N	584	SAMD00112926	PRJDB6655	National Institute of Infectious Diseases	2018-4-11	n/a	major	Contig	full	CLC Genomic Workbench v. 9.0	296.9x	Illumina MiniSeq		GCA_003114895.1	GCF_003114895.1	yes	NC_000017.11	100	112	6.99e-52	207	bacteria
NZ_BFCK01000791.1:65-231	Sat	NZ_BFCK01000791.1	ALR	170	513	65	231	5e-38	138.2	6.1	Proteus mirabilis strain MH13-009N, whole genome shotgun sequence		ASM311489v1	Proteus mirabilis (enterobacteria)	strain=MH13-009N	584	SAMD00112926	PRJDB6655	National Institute of Infectious Diseases	2018-4-11	n/a	major	Contig	full	CLC Genomic Workbench v. 9.0	296.9x	Illumina MiniSeq		GCA_003114895.1	GCF_003114895.1	yes	NC_000017.11	98.802	167	6.6e-79	298	bacteria
NZ_BFCK01000792.1:251-417	Sat	NZ_BFCK01000792.1	ALR	170	675	251	417	1.2e-36	133.7	5.8	Proteus mirabilis strain MH13-009N, whole genome shotgun sequence	WP_109024087.1	ASM311489v1	Proteus mirabilis (enterobacteria)	strain=MH13-009N	584	SAMD00112926	PRJDB6655	National Institute of Infectious Diseases	2018-4-11	n/a	major	Contig	full	CLC Genomic Workbench v. 9.0	296.9x	Illumina MiniSeq		GCA_003114895.1	GCF_003114895.1	yes	NC_000018.10	98.204	167	3.07e-77	292	bacteria
NZ_BFCK01000792.1:418-587	Sat	NZ_BFCK01000792.1	ALR	168	675	418	587	7.2e-39	141	4.5	Proteus mirabilis strain MH13-009N, whole genome shotgun sequence	WP_109024087.1	ASM311489v1	Proteus mirabilis (enterobacteria)	strain=MH13-009N	584	SAMD00112926	PRJDB6655	National Institute of Infectious Diseases	2018-4-11	n/a	major	Contig	full	CLC Genomic Workbench v. 9.0	296.9x	Illumina MiniSeq		GCA_003114895.1	GCF_003114895.1	yes	NC_000018.10	100	170	6.69e-84	315	bacteria
NZ_BFCK01000792.1:588-675	Sat	NZ_BFCK01000792.1	ALR	86	675	588	675	1.1e-14	62.2	9.4	Proteus mirabilis strain MH13-009N, whole genome shotgun sequence	WP_109024087.1	ASM311489v1	Proteus mirabilis (enterobacteria)	strain=MH13-009N	584	SAMD00112926	PRJDB6655	National Institute of Infectious Diseases	2018-4-11	n/a	major	Contig	full	CLC Genomic Workbench v. 9.0	296.9x	Illumina MiniSeq		GCA_003114895.1	GCF_003114895.1	yes	NC_000018.10	100	88	1.1e-38	163	bacteria
NZ_BFCK01000792.1:80-250	Sat	NZ_BFCK01000792.1	ALR	168	675	80	250	3.3e-45	161.6	5.4	Proteus mirabilis strain MH13-009N, whole genome shotgun sequence	WP_109024087.1	ASM311489v1	Proteus mirabilis (enterobacteria)	strain=MH13-009N	584	SAMD00112926	PRJDB6655	National Institute of Infectious Diseases	2018-4-11	n/a	major	Contig	full	CLC Genomic Workbench v. 9.0	296.9x	Illumina MiniSeq		GCA_003114895.1	GCF_003114895.1	yes	NC_000018.10	99.415	171	8.71e-83	311	bacteria
NZ_BFCK01000794.1:59-266	HSATII	NZ_BFCK01000794.1	HSATII	165	564	59	266	1.4e-13	57.9	28.4	Proteus mirabilis strain MH13-009N, whole genome shotgun sequence	WP_061814000.1	ASM311489v1	Proteus mirabilis (enterobacteria)	strain=MH13-009N	584	SAMD00112926	PRJDB6655	National Institute of Infectious Diseases	2018-4-11	n/a	major	Contig	full	CLC Genomic Workbench v. 9.0	296.9x	Illumina MiniSeq		GCA_003114895.1	GCF_003114895.1	yes	NC_000024.10	100	208	6.37e-105	385	bacteria
NZ_BFCK01000798.1:1-154	Sat	NZ_BFCK01000798.1	ALR	151	444	154	1	2.1e-37	136.2	6.2	Proteus mirabilis strain MH13-009N, whole genome shotgun sequence		ASM311489v1	Proteus mirabilis (enterobacteria)	strain=MH13-009N	584	SAMD00112926	PRJDB6655	National Institute of Infectious Diseases	2018-4-11	n/a	major	Contig	full	CLC Genomic Workbench v. 9.0	296.9x	Illumina MiniSeq		GCA_003114895.1	GCF_003114895.1	yes	NC_000020.11	100	154	4.65e-75	285	bacteria
NZ_BFCK01000798.1:155-325	Sat	NZ_BFCK01000798.1	ALR	170	444	325	155	2.3e-41	149.1	6.8	Proteus mirabilis strain MH13-009N, whole genome shotgun sequence		ASM311489v1	Proteus mirabilis (enterobacteria)	strain=MH13-009N	584	SAMD00112926	PRJDB6655	National Institute of Infectious Diseases	2018-4-11	n/a	major	Contig	full	CLC Genomic Workbench v. 9.0	296.9x	Illumina MiniSeq		GCA_003114895.1	GCF_003114895.1	yes	NC_000020.11	100	171	1.87e-84	316	bacteria
NZ_BFCK01000798.1:326-444	Sat	NZ_BFCK01000798.1	ALR	117	444	444	326	4.6e-25	96	7.5	Proteus mirabilis strain MH13-009N, whole genome shotgun sequence		ASM311489v1	Proteus mirabilis (enterobacteria)	strain=MH13-009N	584	SAMD00112926	PRJDB6655	National Institute of Infectious Diseases	2018-4-11	n/a	major	Contig	full	CLC Genomic Workbench v. 9.0	296.9x	Illumina MiniSeq		GCA_003114895.1	GCF_003114895.1	yes	NC_000020.11	100	119	9.61e-56	220	bacteria
NZ_BFCK01000805.1:269-371	Alu	NZ_BFCK01000805.1	AluY	83	371	371	269	1.1e-15	64.4	4.7	Proteus mirabilis strain MH13-009N, whole genome shotgun sequence		ASM311489v1	Proteus mirabilis (enterobacteria)	strain=MH13-009N	584	SAMD00112926	PRJDB6655	National Institute of Infectious Diseases	2018-4-11	n/a	major	Contig	full	CLC Genomic Workbench v. 9.0	296.9x	Illumina MiniSeq		GCA_003114895.1	GCF_003114895.1	yes	NC_000006.12	96.154	104	2.95e-40	169	bacteria
NZ_BFCK01000807.1:81-354	Alu	NZ_BFCK01000807.1	AluY	274	354	81	354	4.7e-94	322	13.5	Proteus mirabilis strain MH13-009N, whole genome shotgun sequence		ASM311489v1	Proteus mirabilis (enterobacteria)	strain=MH13-009N	584	SAMD00112926	PRJDB6655	National Institute of Infectious Diseases	2018-4-11	n/a	major	Contig	full	CLC Genomic Workbench v. 9.0	296.9x	Illumina MiniSeq		GCA_003114895.1	GCF_003114895.1	yes	NC_000019.10	98.113	265	3.9e-128	462	bacteria
NZ_BFCK01000810.1:1-301	LINE	NZ_BFCK01000810.1	L1HS_3end	301	301	301	1	1.3e-54	191.3	23.4	Proteus mirabilis strain MH13-009N, whole genome shotgun sequence		ASM311489v1	Proteus mirabilis (enterobacteria)	strain=MH13-009N	584	SAMD00112926	PRJDB6655	National Institute of Infectious Diseases	2018-4-11	n/a	major	Contig	full	CLC Genomic Workbench v. 9.0	296.9x	Illumina MiniSeq		GCA_003114895.1	GCF_003114895.1	yes	NC_000003.12	99.668	301	8.97e-155	551	bacteria
NZ_BFCK01000816.1:1-142	Sat	NZ_BFCK01000816.1	ALR	140	342	142	1	4.1e-32	118.9	4.6	Proteus mirabilis strain MH13-009N, whole genome shotgun sequence		ASM311489v1	Proteus mirabilis (enterobacteria)	strain=MH13-009N	584	SAMD00112926	PRJDB6655	National Institute of Infectious Diseases	2018-4-11	n/a	major	Contig	full	CLC Genomic Workbench v. 9.0	296.9x	Illumina MiniSeq		GCA_003114895.1	GCF_003114895.1	yes	NC_000002.12	100	141	7.1e-68	261	bacteria
NZ_BFCK01000816.1:143-313	Sat	NZ_BFCK01000816.1	ALR	170	342	313	143	2.3e-45	162.1	9.4	Proteus mirabilis strain MH13-009N, whole genome shotgun sequence		ASM311489v1	Proteus mirabilis (enterobacteria)	strain=MH13-009N	584	SAMD00112926	PRJDB6655	National Institute of Infectious Diseases	2018-4-11	n/a	major	Contig	full	CLC Genomic Workbench v. 9.0	296.9x	Illumina MiniSeq		GCA_003114895.1	GCF_003114895.1	yes	NC_000002.12	100	171	1.87e-84	316	bacteria
NZ_BFCK01000823.1:10-397	LINE	NZ_BFCK01000823.1	L2	398	398	10	397	7.1e-39	136.2	43	Proteus mirabilis strain MH13-009N, whole genome shotgun sequence		ASM311489v1	Proteus mirabilis (enterobacteria)	strain=MH13-009N	584	SAMD00112926	PRJDB6655	National Institute of Infectious Diseases	2018-4-11	n/a	major	Contig	full	CLC Genomic Workbench v. 9.0	296.9x	Illumina MiniSeq		GCA_003114895.1	GCF_003114895.1	yes	NC_000015.10	99.485	388	0	706	bacteria
NZ_BFCK01000827.1:1-335	LINE	NZ_BFCK01000827.1	L1P1_orf2	331	335	1	335	1.7e-75	258.1	47.4	Proteus mirabilis strain MH13-009N, whole genome shotgun sequence		ASM311489v1	Proteus mirabilis (enterobacteria)	strain=MH13-009N	584	SAMD00112926	PRJDB6655	National Institute of Infectious Diseases	2018-4-11	n/a	major	Contig	full	CLC Genomic Workbench v. 9.0	296.9x	Illumina MiniSeq		GCA_003114895.1	GCF_003114895.1	yes	NC_000004.12	99.403	335	5.91e-172	608	bacteria
NZ_BFCK01000832.1:1-325	LINE	NZ_BFCK01000832.1	L1MC4_3end	337	325	1	325	5.4e-48	167.1	32.5	Proteus mirabilis strain MH13-009N, whole genome shotgun sequence		ASM311489v1	Proteus mirabilis (enterobacteria)	strain=MH13-009N	584	SAMD00112926	PRJDB6655	National Institute of Infectious Diseases	2018-4-11	n/a	major	Contig	full	CLC Genomic Workbench v. 9.0	296.9x	Illumina MiniSeq		GCA_003114895.1	GCF_003114895.1	yes	NC_000002.12	100	325	9.56e-170	601	bacteria
NZ_BFCK01000833.1:191-367	Alu	NZ_BFCK01000833.1	AluSx	157	367	367	191	1.3e-47	169.2	7.3	Proteus mirabilis strain MH13-009N, whole genome shotgun sequence		ASM311489v1	Proteus mirabilis (enterobacteria)	strain=MH13-009N	584	SAMD00112926	PRJDB6655	National Institute of Infectious Diseases	2018-4-11	n/a	major	Contig	full	CLC Genomic Workbench v. 9.0	296.9x	Illumina MiniSeq		GCA_003114895.1	GCF_003114895.1	yes	NC_000008.11	94.318	176	5.54e-70	268	bacteria
NZ_BFCK01000835.1:8-309	Alu	NZ_BFCK01000835.1	AluJo	291	316	309	8	1.6e-62	217.9	4.4	Proteus mirabilis strain MH13-009N, whole genome shotgun sequence		ASM311489v1	Proteus mirabilis (enterobacteria)	strain=MH13-009N	584	SAMD00112926	PRJDB6655	National Institute of Infectious Diseases	2018-4-11	n/a	major	Contig	full	CLC Genomic Workbench v. 9.0	296.9x	Illumina MiniSeq		GCA_003114895.1	GCF_003114895.1	yes	NC_000021.9	100	302	5.38e-157	558	bacteria
NZ_BFCK01000836.1:121-401	Alu	NZ_BFCK01000836.1	AluY	261	401	401	121	1.8e-91	313.5	9.6	Proteus mirabilis strain MH13-009N, whole genome shotgun sequence		ASM311489v1	Proteus mirabilis (enterobacteria)	strain=MH13-009N	584	SAMD00112926	PRJDB6655	National Institute of Infectious Diseases	2018-4-11	n/a	major	Contig	full	CLC Genomic Workbench v. 9.0	296.9x	Illumina MiniSeq		GCA_003114895.1	GCF_003114895.1	yes	NC_000011.10	95.374	281	1.12e-123	448	bacteria
NZ_BFCK01000840.1:157-430	Alu	NZ_BFCK01000840.1	AluY	274	430	157	430	1.1e-96	330.7	14.9	Proteus mirabilis strain MH13-009N, whole genome shotgun sequence		ASM311489v1	Proteus mirabilis (enterobacteria)	strain=MH13-009N	584	SAMD00112926	PRJDB6655	National Institute of Infectious Diseases	2018-4-11	n/a	major	Contig	full	CLC Genomic Workbench v. 9.0	296.9x	Illumina MiniSeq		GCA_003114895.1	GCF_003114895.1	yes	NC_000002.12	98.188	276	1.08e-133	481	bacteria
NZ_BFCK01000844.1:43-233	HSATII	NZ_BFCK01000844.1	HSATII	143	444	233	43	6.9e-14	58.9	12.6	Proteus mirabilis strain MH13-009N, whole genome shotgun sequence	WP_109024095.1	ASM311489v1	Proteus mirabilis (enterobacteria)	strain=MH13-009N	584	SAMD00112926	PRJDB6655	National Institute of Infectious Diseases	2018-4-11	n/a	major	Contig	full	CLC Genomic Workbench v. 9.0	296.9x	Illumina MiniSeq		GCA_003114895.1	GCF_003114895.1	yes	NC_000024.10	99.476	191	7.57e-94	348	bacteria
NZ_BFCK01000849.1:241-364	LINE	NZ_BFCK01000849.1	L1MC4_3end	117	364	241	364	1.2e-16	63	9.4	Proteus mirabilis strain MH13-009N, whole genome shotgun sequence		ASM311489v1	Proteus mirabilis (enterobacteria)	strain=MH13-009N	584	SAMD00112926	PRJDB6655	National Institute of Infectious Diseases	2018-4-11	n/a	major	Contig	full	CLC Genomic Workbench v. 9.0	296.9x	Illumina MiniSeq		GCA_003114895.1	GCF_003114895.1	yes	NC_000014.9	100	124	1.69e-58	230	bacteria
NZ_BFCK01000850.1:1-212	Alu	NZ_BFCK01000850.1	AluJo	198	367	1	212	2.6e-53	187.7	2.2	Proteus mirabilis strain MH13-009N, whole genome shotgun sequence		ASM311489v1	Proteus mirabilis (enterobacteria)	strain=MH13-009N	584	SAMD00112926	PRJDB6655	National Institute of Infectious Diseases	2018-4-11	n/a	major	Contig	full	CLC Genomic Workbench v. 9.0	296.9x	Illumina MiniSeq		GCA_003114895.1	GCF_003114895.1	yes	NC_000001.11	94.811	212	8.61e-89	331	bacteria
NZ_BFCK01000851.1:147-439	LTR	NZ_BFCK01000851.1	MSTB	313	439	147	439	1e-62	218.9	8.2	Proteus mirabilis strain MH13-009N, whole genome shotgun sequence		ASM311489v1	Proteus mirabilis (enterobacteria)	strain=MH13-009N	584	SAMD00112926	PRJDB6655	National Institute of Infectious Diseases	2018-4-11	n/a	major	Contig	full	CLC Genomic Workbench v. 9.0	296.9x	Illumina MiniSeq		GCA_003114895.1	GCF_003114895.1	yes	NC_000020.11	100	293	5.24e-152	542	bacteria
NZ_BFCK01000852.1:236-404	Sat	NZ_BFCK01000852.1	ALR	168	468	236	404	8e-45	160.4	7.8	Proteus mirabilis strain MH13-009N, whole genome shotgun sequence		ASM311489v1	Proteus mirabilis (enterobacteria)	strain=MH13-009N	584	SAMD00112926	PRJDB6655	National Institute of Infectious Diseases	2018-4-11	n/a	major	Contig	full	CLC Genomic Workbench v. 9.0	296.9x	Illumina MiniSeq		GCA_003114895.1	GCF_003114895.1	yes	NC_000006.12	98.817	169	5.17e-80	302	bacteria
NZ_BFCK01000852.1:407-468	Sat	NZ_BFCK01000852.1	ALR	59	468	407	468	7.1e-11	49.8	2.7	Proteus mirabilis strain MH13-009N, whole genome shotgun sequence		ASM311489v1	Proteus mirabilis (enterobacteria)	strain=MH13-009N	584	SAMD00112926	PRJDB6655	National Institute of Infectious Diseases	2018-4-11	n/a	major	Contig	full	CLC Genomic Workbench v. 9.0	296.9x	Illumina MiniSeq		GCA_003114895.1	GCF_003114895.1	yes	NC_000006.12	100	62	1.85e-24	115	bacteria
NZ_BFCK01000852.1:66-234	Sat	NZ_BFCK01000852.1	ALR	170	468	66	234	2.6e-42	152.2	2.7	Proteus mirabilis strain MH13-009N, whole genome shotgun sequence		ASM311489v1	Proteus mirabilis (enterobacteria)	strain=MH13-009N	584	SAMD00112926	PRJDB6655	National Institute of Infectious Diseases	2018-4-11	n/a	major	Contig	full	CLC Genomic Workbench v. 9.0	296.9x	Illumina MiniSeq		GCA_003114895.1	GCF_003114895.1	yes	NC_000006.12	100	169	2.39e-83	313	bacteria
NZ_BFCK01000856.1:1-168	Sat	NZ_BFCK01000856.1	ALR	167	458	1	168	5e-44	157.8	4.6	Proteus mirabilis strain MH13-009N, whole genome shotgun sequence	WP_109024096.1	ASM311489v1	Proteus mirabilis (enterobacteria)	strain=MH13-009N	584	SAMD00112926	PRJDB6655	National Institute of Infectious Diseases	2018-4-11	n/a	major	Contig	full	CLC Genomic Workbench v. 9.0	296.9x	Illumina MiniSeq		GCA_003114895.1	GCF_003114895.1	yes	NC_000013.11	99.405	168	3.97e-81	305	bacteria
NZ_BFCK01000856.1:169-335	Sat	NZ_BFCK01000856.1	ALR	170	458	169	335	1.6e-39	143.1	11	Proteus mirabilis strain MH13-009N, whole genome shotgun sequence	WP_109024096.1	ASM311489v1	Proteus mirabilis (enterobacteria)	strain=MH13-009N	584	SAMD00112926	PRJDB6655	National Institute of Infectious Diseases	2018-4-11	n/a	major	Contig	full	CLC Genomic Workbench v. 9.0	296.9x	Illumina MiniSeq		GCA_003114895.1	GCF_003114895.1	yes	NC_000013.11	99.401	167	1.42e-80	303	bacteria
NZ_BFCK01000856.1:336-458	Sat	NZ_BFCK01000856.1	ALR	122	458	336	458	1.9e-28	107	4	Proteus mirabilis strain MH13-009N, whole genome shotgun sequence	WP_109024096.1	ASM311489v1	Proteus mirabilis (enterobacteria)	strain=MH13-009N	584	SAMD00112926	PRJDB6655	National Institute of Infectious Diseases	2018-4-11	n/a	major	Contig	full	CLC Genomic Workbench v. 9.0	296.9x	Illumina MiniSeq		GCA_003114895.1	GCF_003114895.1	yes	NC_000013.11	98.374	123	1.3e-54	217	bacteria
NZ_BFCK01000857.1:257-348	Sat	NZ_BFCK01000857.1	ALR	91	348	257	348	2.5e-23	90.3	5.6	Proteus mirabilis strain MH13-009N, whole genome shotgun sequence		ASM311489v1	Proteus mirabilis (enterobacteria)	strain=MH13-009N	584	SAMD00112926	PRJDB6655	National Institute of Infectious Diseases	2018-4-11	n/a	major	Contig	full	CLC Genomic Workbench v. 9.0	296.9x	Illumina MiniSeq		GCA_003114895.1	GCF_003114895.1	yes	NC_000001.11	97.826	92	1.52e-37	159	bacteria
NZ_BFCK01000857.1:86-256	Sat	NZ_BFCK01000857.1	ALR	170	348	86	256	3.5e-57	200.6	8.1	Proteus mirabilis strain MH13-009N, whole genome shotgun sequence		ASM311489v1	Proteus mirabilis (enterobacteria)	strain=MH13-009N	584	SAMD00112926	PRJDB6655	National Institute of Infectious Diseases	2018-4-11	n/a	major	Contig	full	CLC Genomic Workbench v. 9.0	296.9x	Illumina MiniSeq		GCA_003114895.1	GCF_003114895.1	yes	NC_000016.10	96.471	170	2.46e-73	279	bacteria
NZ_BFCK01000865.1:1-405	LTR	NZ_BFCK01000865.1	THE1-int	421	405	1	405	7.9e-119	402.6	4.2	Proteus mirabilis strain MH13-009N, whole genome shotgun sequence		ASM311489v1	Proteus mirabilis (enterobacteria)	strain=MH13-009N	584	SAMD00112926	PRJDB6655	National Institute of Infectious Diseases	2018-4-11	n/a	major	Contig	full	CLC Genomic Workbench v. 9.0	296.9x	Illumina MiniSeq		GCA_003114895.1	GCF_003114895.1	yes	NC_000007.14	96.296	405	0	664	bacteria
NZ_BFCK01000866.1:173-342	Sat	NZ_BFCK01000866.1	ALR	166	475	173	342	3.7e-36	132.1	8.4	Proteus mirabilis strain MH13-009N, whole genome shotgun sequence		ASM311489v1	Proteus mirabilis (enterobacteria)	strain=MH13-009N	584	SAMD00112926	PRJDB6655	National Institute of Infectious Diseases	2018-4-11	n/a	major	Contig	full	CLC Genomic Workbench v. 9.0	296.9x	Illumina MiniSeq		GCA_003114895.1	GCF_003114895.1	yes	NC_000023.11	100	170	6.69e-84	315	bacteria
NZ_BFCK01000866.1:343-475	Sat	NZ_BFCK01000866.1	ALR	126	475	343	475	4.7e-29	109	3.2	Proteus mirabilis strain MH13-009N, whole genome shotgun sequence		ASM311489v1	Proteus mirabilis (enterobacteria)	strain=MH13-009N	584	SAMD00112926	PRJDB6655	National Institute of Infectious Diseases	2018-4-11	n/a	major	Contig	full	CLC Genomic Workbench v. 9.0	296.9x	Illumina MiniSeq		GCA_003114895.1	GCF_003114895.1	yes	NC_000023.11	100	133	1.83e-63	246	bacteria
NZ_BFCK01000866.1:5-172	Sat	NZ_BFCK01000866.1	ALR	170	475	5	172	4.7e-34	125.3	3	Proteus mirabilis strain MH13-009N, whole genome shotgun sequence		ASM311489v1	Proteus mirabilis (enterobacteria)	strain=MH13-009N	584	SAMD00112926	PRJDB6655	National Institute of Infectious Diseases	2018-4-11	n/a	major	Contig	full	CLC Genomic Workbench v. 9.0	296.9x	Illumina MiniSeq		GCA_003114895.1	GCF_003114895.1	yes	NC_000023.11	100	168	8.53e-83	311	bacteria
NZ_BFCO01000198.1:1-658	LINE	NZ_BFCO01000198.1	L1P1_orf2	657	658	658	1	4.4e-243	814.3	59.4	Escherichia coli strain MH13-051M, whole genome shotgun sequence		ASM311497v1	Escherichia coli (E. coli)	strain=MH13-051M	562	SAMD00112930	PRJDB6655	National Institute of Infectious Diseases	2018-4-11	n/a	major	Contig	full	CLC Genomic Workbench v. 9.0	107.9x	Illumina MiniSeq		GCA_003114975.1	GCF_003114975.1	yes	NC_000005.10	98.784	658	0	1171	bacteria
NZ_BFCO01000213.1:1-452	LINE	NZ_BFCO01000213.1	L1HS_3end	450	452	452	1	1.6e-164	555.2	18.7	Escherichia coli strain MH13-051M, whole genome shotgun sequence	WP_108943797.1	ASM311497v1	Escherichia coli (E. coli)	strain=MH13-051M	562	SAMD00112930	PRJDB6655	National Institute of Infectious Diseases	2018-4-11	n/a	major	Contig	full	CLC Genomic Workbench v. 9.0	107.9x	Illumina MiniSeq		GCA_003114975.1	GCF_003114975.1	yes	NC_000006.12	98.67	451	0	800	bacteria
NZ_BFCO01000226.1:17-185	Sat	NZ_BFCO01000226.1	ALR	168	637	17	185	7.6e-37	134.4	6.7	Escherichia coli strain MH13-051M, whole genome shotgun sequence		ASM311497v1	Escherichia coli (E. coli)	strain=MH13-051M	562	SAMD00112930	PRJDB6655	National Institute of Infectious Diseases	2018-4-11	n/a	major	Contig	full	CLC Genomic Workbench v. 9.0	107.9x	Illumina MiniSeq		GCA_003114975.1	GCF_003114975.1	yes	NC_000001.11	97.041	169	5.21e-75	285	bacteria
NZ_BFCO01000226.1:188-355	Sat	NZ_BFCO01000226.1	ALR	169	637	188	355	4.1e-37	135.3	6	Escherichia coli strain MH13-051M, whole genome shotgun sequence		ASM311497v1	Escherichia coli (E. coli)	strain=MH13-051M	562	SAMD00112930	PRJDB6655	National Institute of Infectious Diseases	2018-4-11	n/a	major	Contig	full	CLC Genomic Workbench v. 9.0	107.9x	Illumina MiniSeq		GCA_003114975.1	GCF_003114975.1	yes	NC_000001.11	98.214	168	8.59e-78	294	bacteria
NZ_BFCO01000226.1:357-525	Sat	NZ_BFCO01000226.1	ALR	168	637	357	525	2.4e-42	152.4	6.9	Escherichia coli strain MH13-051M, whole genome shotgun sequence		ASM311497v1	Escherichia coli (E. coli)	strain=MH13-051M	562	SAMD00112930	PRJDB6655	National Institute of Infectious Diseases	2018-4-11	n/a	major	Contig	full	CLC Genomic Workbench v. 9.0	107.9x	Illumina MiniSeq		GCA_003114975.1	GCF_003114975.1	yes	NC_000001.11	100	169	2.39e-83	313	bacteria
NZ_BFCO01000226.1:528-637	Sat	NZ_BFCO01000226.1	ALR	108	637	528	637	4.3e-27	102.7	5.2	Escherichia coli strain MH13-051M, whole genome shotgun sequence		ASM311497v1	Escherichia coli (E. coli)	strain=MH13-051M	562	SAMD00112930	PRJDB6655	National Institute of Infectious Diseases	2018-4-11	n/a	major	Contig	full	CLC Genomic Workbench v. 9.0	107.9x	Illumina MiniSeq		GCA_003114975.1	GCF_003114975.1	yes	NC_000001.11	100	110	8.83e-51	204	bacteria
NZ_BFCO01000231.1:1-116	Sat	NZ_BFCO01000231.1	ALR	114	825	1	116	7.8e-18	72.5	5.9	Escherichia coli strain MH13-051M, whole genome shotgun sequence		ASM311497v1	Escherichia coli (E. coli)	strain=MH13-051M	562	SAMD00112930	PRJDB6655	National Institute of Infectious Diseases	2018-4-11	n/a	major	Contig	full	CLC Genomic Workbench v. 9.0	107.9x	Illumina MiniSeq		GCA_003114975.1	GCF_003114975.1	yes	NC_000007.14	100	116	4.33e-54	215	bacteria
NZ_BFCO01000231.1:118-286	Sat	NZ_BFCO01000231.1	ALR	170	825	118	286	1.4e-38	140.1	6.5	Escherichia coli strain MH13-051M, whole genome shotgun sequence		ASM311497v1	Escherichia coli (E. coli)	strain=MH13-051M	562	SAMD00112930	PRJDB6655	National Institute of Infectious Diseases	2018-4-11	n/a	major	Contig	full	CLC Genomic Workbench v. 9.0	107.9x	Illumina MiniSeq		GCA_003114975.1	GCF_003114975.1	yes	NC_000007.14	100	169	2.39e-83	313	bacteria
NZ_BFCO01000231.1:288-456	Sat	NZ_BFCO01000231.1	ALR	168	825	288	456	7.1e-41	147.6	7.7	Escherichia coli strain MH13-051M, whole genome shotgun sequence		ASM311497v1	Escherichia coli (E. coli)	strain=MH13-051M	562	SAMD00112930	PRJDB6655	National Institute of Infectious Diseases	2018-4-11	n/a	major	Contig	full	CLC Genomic Workbench v. 9.0	107.9x	Illumina MiniSeq		GCA_003114975.1	GCF_003114975.1	yes	NC_000007.14	99.408	169	1.11e-81	307	bacteria
NZ_BFCO01000231.1:458-626	Sat	NZ_BFCO01000231.1	ALR	170	825	458	626	4e-43	154.9	7.1	Escherichia coli strain MH13-051M, whole genome shotgun sequence		ASM311497v1	Escherichia coli (E. coli)	strain=MH13-051M	562	SAMD00112930	PRJDB6655	National Institute of Infectious Diseases	2018-4-11	n/a	major	Contig	full	CLC Genomic Workbench v. 9.0	107.9x	Illumina MiniSeq		GCA_003114975.1	GCF_003114975.1	yes	NC_000007.14	97.633	169	1.12e-76	291	bacteria
NZ_BFCO01000231.1:628-796	Sat	NZ_BFCO01000231.1	ALR	168	825	628	796	2.7e-39	142.4	8.4	Escherichia coli strain MH13-051M, whole genome shotgun sequence		ASM311497v1	Escherichia coli (E. coli)	strain=MH13-051M	562	SAMD00112930	PRJDB6655	National Institute of Infectious Diseases	2018-4-11	n/a	major	Contig	full	CLC Genomic Workbench v. 9.0	107.9x	Illumina MiniSeq		GCA_003114975.1	GCF_003114975.1	yes	NC_000007.14	97.633	169	1.12e-76	291	bacteria
NZ_BFCO01000232.1:175-345	Sat	NZ_BFCO01000232.1	ALR	170	471	175	345	8.6e-53	186.4	5.5	Escherichia coli strain MH13-051M, whole genome shotgun sequence		ASM311497v1	Escherichia coli (E. coli)	strain=MH13-051M	562	SAMD00112930	PRJDB6655	National Institute of Infectious Diseases	2018-4-11	n/a	major	Contig	full	CLC Genomic Workbench v. 9.0	107.9x	Illumina MiniSeq		GCA_003114975.1	GCF_003114975.1	yes	NC_000015.10	97.661	171	8.78e-78	294	bacteria
NZ_BFCO01000232.1:346-471	Sat	NZ_BFCO01000232.1	ALR	123	471	346	471	1.9e-34	126.6	5.4	Escherichia coli strain MH13-051M, whole genome shotgun sequence		ASM311497v1	Escherichia coli (E. coli)	strain=MH13-051M	562	SAMD00112930	PRJDB6655	National Institute of Infectious Diseases	2018-4-11	n/a	major	Contig	full	CLC Genomic Workbench v. 9.0	107.9x	Illumina MiniSeq		GCA_003114975.1	GCF_003114975.1	yes	NC_000013.11	95.238	126	1.35e-49	200	bacteria
NZ_BFCO01000232.1:4-174	Sat	NZ_BFCO01000232.1	ALR	170	471	4	174	4.9e-47	167.6	12.3	Escherichia coli strain MH13-051M, whole genome shotgun sequence		ASM311497v1	Escherichia coli (E. coli)	strain=MH13-051M	562	SAMD00112930	PRJDB6655	National Institute of Infectious Diseases	2018-4-11	n/a	major	Contig	full	CLC Genomic Workbench v. 9.0	107.9x	Illumina MiniSeq		GCA_003114975.1	GCF_003114975.1	yes	NC_000009.12	96.491	171	1.9e-74	283	bacteria
NZ_BFCO01000235.1:226-396	Sat	NZ_BFCO01000235.1	ALR	170	574	226	396	2.7e-42	152.2	7.8	Escherichia coli strain MH13-051M, whole genome shotgun sequence		ASM311497v1	Escherichia coli (E. coli)	strain=MH13-051M	562	SAMD00112930	PRJDB6655	National Institute of Infectious Diseases	2018-4-11	n/a	major	Contig	full	CLC Genomic Workbench v. 9.0	107.9x	Illumina MiniSeq		GCA_003114975.1	GCF_003114975.1	yes	NC_000011.10	100	171	1.87e-84	316	bacteria
NZ_BFCO01000235.1:397-564	Sat	NZ_BFCO01000235.1	ALR	170	574	397	564	3.7e-33	122.4	3.4	Escherichia coli strain MH13-051M, whole genome shotgun sequence		ASM311497v1	Escherichia coli (E. coli)	strain=MH13-051M	562	SAMD00112930	PRJDB6655	National Institute of Infectious Diseases	2018-4-11	n/a	major	Contig	full	CLC Genomic Workbench v. 9.0	107.9x	Illumina MiniSeq		GCA_003114975.1	GCF_003114975.1	yes	NC_000011.10	99.405	168	3.97e-81	305	bacteria
NZ_BFCO01000235.1:56-225	Sat	NZ_BFCO01000235.1	ALR	170	574	56	225	1.1e-42	153.4	3.5	Escherichia coli strain MH13-051M, whole genome shotgun sequence		ASM311497v1	Escherichia coli (E. coli)	strain=MH13-051M	562	SAMD00112930	PRJDB6655	National Institute of Infectious Diseases	2018-4-11	n/a	major	Contig	full	CLC Genomic Workbench v. 9.0	107.9x	Illumina MiniSeq		GCA_003114975.1	GCF_003114975.1	yes	NC_000011.10	99.412	170	3.11e-82	309	bacteria
NZ_BFCO01000236.1:1-416	LTR	NZ_BFCO01000236.1	THE1-int	416	416	416	1	1.2e-129	438.5	3.4	Escherichia coli strain MH13-051M, whole genome shotgun sequence		ASM311497v1	Escherichia coli (E. coli)	strain=MH13-051M	562	SAMD00112930	PRJDB6655	National Institute of Infectious Diseases	2018-4-11	n/a	major	Contig	full	CLC Genomic Workbench v. 9.0	107.9x	Illumina MiniSeq		GCA_003114975.1	GCF_003114975.1	yes	NC_000001.11	99.519	416	0	758	bacteria
NZ_BFCO01000240.1:108-278	Sat	NZ_BFCO01000240.1	ALR	170	551	108	278	4.4e-52	184.1	5.8	Escherichia coli strain MH13-051M, whole genome shotgun sequence	WP_108943800.1	ASM311497v1	Escherichia coli (E. coli)	strain=MH13-051M	562	SAMD00112930	PRJDB6655	National Institute of Infectious Diseases	2018-4-11	n/a	major	Contig	full	CLC Genomic Workbench v. 9.0	107.9x	Illumina MiniSeq		GCA_003114975.1	GCF_003114975.1	yes	NC_000002.12	97.661	171	8.78e-78	294	bacteria
NZ_BFCO01000240.1:1-107	Sat	NZ_BFCO01000240.1	ALR	106	551	1	107	2.1e-25	97.2	9.9	Escherichia coli strain MH13-051M, whole genome shotgun sequence	WP_108943800.1	ASM311497v1	Escherichia coli (E. coli)	strain=MH13-051M	562	SAMD00112930	PRJDB6655	National Institute of Infectious Diseases	2018-4-11	n/a	major	Contig	full	CLC Genomic Workbench v. 9.0	107.9x	Illumina MiniSeq		GCA_003114975.1	GCF_003114975.1	yes	NC_000002.12	99.065	107	1.84e-47	193	bacteria
NZ_BFCO01000240.1:279-445	Sat	NZ_BFCO01000240.1	ALR	170	551	279	445	2.3e-41	149.1	10.9	Escherichia coli strain MH13-051M, whole genome shotgun sequence	WP_108943800.1	ASM311497v1	Escherichia coli (E. coli)	strain=MH13-051M	562	SAMD00112930	PRJDB6655	National Institute of Infectious Diseases	2018-4-11	n/a	major	Contig	full	CLC Genomic Workbench v. 9.0	107.9x	Illumina MiniSeq		GCA_003114975.1	GCF_003114975.1	yes	NC_000002.12	95.808	167	1.44e-70	270	bacteria
NZ_BFCO01000240.1:446-551	Sat	NZ_BFCO01000240.1	ALR	103	551	446	551	2.5e-19	77.3	3	Escherichia coli strain MH13-051M, whole genome shotgun sequence	WP_108943800.1	ASM311497v1	Escherichia coli (E. coli)	strain=MH13-051M	562	SAMD00112930	PRJDB6655	National Institute of Infectious Diseases	2018-4-11	n/a	major	Contig	full	CLC Genomic Workbench v. 9.0	107.9x	Illumina MiniSeq		GCA_003114975.1	GCF_003114975.1	yes	NC_000018.10	100	106	1.41e-48	196	bacteria
NZ_BFCO01000242.1:208-316	Alu	NZ_BFCO01000242.1	AluSx	108	316	208	316	3.8e-30	111.8	5.1	Escherichia coli strain MH13-051M, whole genome shotgun sequence		ASM311497v1	Escherichia coli (E. coli)	strain=MH13-051M	562	SAMD00112930	PRJDB6655	National Institute of Infectious Diseases	2018-4-11	n/a	major	Contig	full	CLC Genomic Workbench v. 9.0	107.9x	Illumina MiniSeq		GCA_003114975.1	GCF_003114975.1	yes	NC_000001.11	100	109	3.14e-50	202	bacteria
NZ_BFCQ01000125.1:1-147	HSATII	NZ_BFCQ01000125.1	HSATII	146	308	1	147	1.1e-35	129.9	10.4	Klebsiella pneumoniae strain MH15-289M, whole genome shotgun sequence		ASM311501v1	Klebsiella pneumoniae (enterobacteria)	strain=MH15-289M	573	SAMD00112932	PRJDB6655	National Institute of Infectious Diseases	2018-4-11	n/a	major	Contig	full	CLC Genomic Workbench v. 9.0	158.8x	Illumina HiSeq 4000		GCA_003115015.1	GCF_003115015.1	yes	NC_000016.10	100	147	3.42e-71	272	bacteria
NZ_BFCQ01000125.1:148-308	HSATII	NZ_BFCQ01000125.1	HSATII	160	308	148	308	1.4e-35	129.6	16.8	Klebsiella pneumoniae strain MH15-289M, whole genome shotgun sequence		ASM311501v1	Klebsiella pneumoniae (enterobacteria)	strain=MH15-289M	573	SAMD00112932	PRJDB6655	National Institute of Infectious Diseases	2018-4-11	n/a	major	Contig	full	CLC Genomic Workbench v. 9.0	158.8x	Illumina HiSeq 4000		GCA_003115015.1	GCF_003115015.1	yes	NC_000016.10	100	161	6.31e-79	298	bacteria
NZ_BFCQ01000126.1:1-153	HSATII	NZ_BFCQ01000126.1	HSATII	152	823	153	1	2e-32	119.3	17.7	Klebsiella pneumoniae strain MH15-289M, whole genome shotgun sequence		ASM311501v1	Klebsiella pneumoniae (enterobacteria)	strain=MH15-289M	573	SAMD00112932	PRJDB6655	National Institute of Infectious Diseases	2018-4-11	n/a	major	Contig	full	CLC Genomic Workbench v. 9.0	158.8x	Illumina HiSeq 4000		GCA_003115015.1	GCF_003115015.1	yes	NC_000016.10	100	153	1.66e-74	283	bacteria
NZ_BFCQ01000126.1:225-390	HSATII	NZ_BFCQ01000126.1	HSATII	164	823	390	225	1.7e-43	155.4	14	Klebsiella pneumoniae strain MH15-289M, whole genome shotgun sequence		ASM311501v1	Klebsiella pneumoniae (enterobacteria)	strain=MH15-289M	573	SAMD00112932	PRJDB6655	National Institute of Infectious Diseases	2018-4-11	n/a	major	Contig	full	CLC Genomic Workbench v. 9.0	158.8x	Illumina HiSeq 4000		GCA_003115015.1	GCF_003115015.1	yes	NC_000016.10	98.193	166	1.1e-76	291	bacteria
NZ_BFCQ01000126.1:539-708	HSATII	NZ_BFCQ01000126.1	HSATII	169	823	708	539	5e-52	183.2	13.3	Klebsiella pneumoniae strain MH15-289M, whole genome shotgun sequence		ASM311501v1	Klebsiella pneumoniae (enterobacteria)	strain=MH15-289M	573	SAMD00112932	PRJDB6655	National Institute of Infectious Diseases	2018-4-11	n/a	major	Contig	full	CLC Genomic Workbench v. 9.0	158.8x	Illumina HiSeq 4000		GCA_003115015.1	GCF_003115015.1	yes	NC_000016.10	96.471	170	6.79e-74	281	bacteria
NZ_BFCQ01000130.1:332-544	HSATII	NZ_BFCQ01000130.1	HSATII	160	757	544	332	1.4e-16	67.7	28.7	Klebsiella pneumoniae strain MH15-289M, whole genome shotgun sequence	WP_108993215.1	ASM311501v1	Klebsiella pneumoniae (enterobacteria)	strain=MH15-289M	573	SAMD00112932	PRJDB6655	National Institute of Infectious Diseases	2018-4-11	n/a	major	Contig	full	CLC Genomic Workbench v. 9.0	158.8x	Illumina HiSeq 4000		GCA_003115015.1	GCF_003115015.1	yes	NC_000024.10	93.427	213	2.42e-84	316	bacteria
NZ_BFCQ01000131.1:1-378	LINE	NZ_BFCQ01000131.1	L1HS_5end	377	378	1	378	7e-130	439.6	36	Klebsiella pneumoniae strain MH15-289M, whole genome shotgun sequence		ASM311501v1	Klebsiella pneumoniae (enterobacteria)	strain=MH15-289M	573	SAMD00112932	PRJDB6655	National Institute of Infectious Diseases	2018-4-11	n/a	major	Contig	full	CLC Genomic Workbench v. 9.0	158.8x	Illumina HiSeq 4000		GCA_003115015.1	GCF_003115015.1	yes	NC_000013.11	97.619	378	0	649	bacteria
NZ_BFCQ01000133.1:1-378	LINE	NZ_BFCQ01000133.1	L1P1_orf2	377	378	1	378	3e-139	469.7	19.1	Klebsiella pneumoniae strain MH15-289M, whole genome shotgun sequence		ASM311501v1	Klebsiella pneumoniae (enterobacteria)	strain=MH15-289M	573	SAMD00112932	PRJDB6655	National Institute of Infectious Diseases	2018-4-11	n/a	major	Contig	full	CLC Genomic Workbench v. 9.0	158.8x	Illumina HiSeq 4000		GCA_003115015.1	GCF_003115015.1	yes	NC_000010.11	99.735	378	0	693	bacteria
NZ_BFCQ01000134.1:137-291	HSATII	NZ_BFCQ01000134.1	HSATII	153	475	137	291	6.1e-38	137.3	12.7	Klebsiella pneumoniae strain MH15-289M, whole genome shotgun sequence		ASM311501v1	Klebsiella pneumoniae (enterobacteria)	strain=MH15-289M	573	SAMD00112932	PRJDB6655	National Institute of Infectious Diseases	2018-4-11	n/a	major	Contig	full	CLC Genomic Workbench v. 9.0	158.8x	Illumina HiSeq 4000		GCA_003115015.1	GCF_003115015.1	yes	NC_000001.11	100	155	1.3e-75	287	bacteria
NZ_BFCQ01000134.1:338-475	HSATII	NZ_BFCQ01000134.1	HSATII	134	475	338	475	2e-30	112.8	16	Klebsiella pneumoniae strain MH15-289M, whole genome shotgun sequence		ASM311501v1	Klebsiella pneumoniae (enterobacteria)	strain=MH15-289M	573	SAMD00112932	PRJDB6655	National Institute of Infectious Diseases	2018-4-11	n/a	major	Contig	full	CLC Genomic Workbench v. 9.0	158.8x	Illumina HiSeq 4000		GCA_003115015.1	GCF_003115015.1	yes	NC_000001.11	100	138	3.19e-66	255	bacteria
NZ_BFCQ01000136.1:99-241	HSATII	NZ_BFCQ01000136.1	HSATII	141	348	99	241	7.3e-37	133.8	15.2	Klebsiella pneumoniae strain MH15-289M, whole genome shotgun sequence		ASM311501v1	Klebsiella pneumoniae (enterobacteria)	strain=MH15-289M	573	SAMD00112932	PRJDB6655	National Institute of Infectious Diseases	2018-4-11	n/a	major	Contig	full	CLC Genomic Workbench v. 9.0	158.8x	Illumina HiSeq 4000		GCA_003115015.1	GCF_003115015.1	yes	NC_000016.10	99.301	143	2.57e-67	259	bacteria
NZ_BFCQ01000137.1:317-453	HSATII	NZ_BFCQ01000137.1	HSATII	134	453	453	317	1.8e-25	96.7	13.6	Klebsiella pneumoniae strain MH15-289M, whole genome shotgun sequence		ASM311501v1	Klebsiella pneumoniae (enterobacteria)	strain=MH15-289M	573	SAMD00112932	PRJDB6655	National Institute of Infectious Diseases	2018-4-11	n/a	major	Contig	full	CLC Genomic Workbench v. 9.0	158.8x	Illumina HiSeq 4000		GCA_003115015.1	GCF_003115015.1	yes	NC_000001.11	100	137	1.14e-65	254	bacteria
NZ_BFCQ01000137.1:91-258	HSATII	NZ_BFCQ01000137.1	HSATII	159	453	258	91	4.3e-41	147.6	12.8	Klebsiella pneumoniae strain MH15-289M, whole genome shotgun sequence		ASM311501v1	Klebsiella pneumoniae (enterobacteria)	strain=MH15-289M	573	SAMD00112932	PRJDB6655	National Institute of Infectious Diseases	2018-4-11	n/a	major	Contig	full	CLC Genomic Workbench v. 9.0	158.8x	Illumina HiSeq 4000		GCA_003115015.1	GCF_003115015.1	yes	NC_000001.11	100	168	8.53e-83	311	bacteria
NZ_BFCQ01000138.1:348-546	HSATII	NZ_BFCQ01000138.1	HSATII	159	616	348	546	7.6e-11	49	26	Klebsiella pneumoniae strain MH15-289M, whole genome shotgun sequence	WP_108993216.1	ASM311501v1	Klebsiella pneumoniae (enterobacteria)	strain=MH15-289M	573	SAMD00112932	PRJDB6655	National Institute of Infectious Diseases	2018-4-11	n/a	major	Contig	full	CLC Genomic Workbench v. 9.0	158.8x	Illumina HiSeq 4000		GCA_003115015.1	GCF_003115015.1	yes	NC_000024.10	98.492	199	6.14e-95	351	bacteria
NZ_BFCQ01000139.1:1-224	Alu	NZ_BFCQ01000139.1	AluSx	223	406	224	1	1.5e-79	274.2	7.3	Klebsiella pneumoniae strain MH15-289M, whole genome shotgun sequence		ASM311501v1	Klebsiella pneumoniae (enterobacteria)	strain=MH15-289M	573	SAMD00112932	PRJDB6655	National Institute of Infectious Diseases	2018-4-11	n/a	major	Contig	full	CLC Genomic Workbench v. 9.0	158.8x	Illumina HiSeq 4000		GCA_003115015.1	GCF_003115015.1	yes	NC_000001.11	96.818	220	6.99e-100	368	bacteria
NZ_BFCQ01000139.1:225-359	Alu	NZ_BFCQ01000139.1	FRAM	159	406	359	225	9.3e-26	97.7	3.1	Klebsiella pneumoniae strain MH15-289M, whole genome shotgun sequence		ASM311501v1	Klebsiella pneumoniae (enterobacteria)	strain=MH15-289M	573	SAMD00112932	PRJDB6655	National Institute of Infectious Diseases	2018-4-11	n/a	major	Contig	full	CLC Genomic Workbench v. 9.0	158.8x	Illumina HiSeq 4000		GCA_003115015.1	GCF_003115015.1	yes	NC_000015.10	96.296	135	1.13e-55	220	bacteria
NZ_BFCQ01000140.1:1-150	Sat	NZ_BFCQ01000140.1	ALR	143	326	150	1	3.4e-40	145.4	5.8	Klebsiella pneumoniae strain MH15-289M, whole genome shotgun sequence		ASM311501v1	Klebsiella pneumoniae (enterobacteria)	strain=MH15-289M	573	SAMD00112932	PRJDB6655	National Institute of Infectious Diseases	2018-4-11	n/a	major	Contig	full	CLC Genomic Workbench v. 9.0	158.8x	Illumina HiSeq 4000		GCA_003115015.1	GCF_003115015.1	yes	NC_000010.11	98	150	7.59e-68	261	bacteria
NZ_BFCQ01000140.1:152-320	Sat	NZ_BFCQ01000140.1	ALR	168	326	320	152	1.3e-47	169.5	8.6	Klebsiella pneumoniae strain MH15-289M, whole genome shotgun sequence		ASM311501v1	Klebsiella pneumoniae (enterobacteria)	strain=MH15-289M	573	SAMD00112932	PRJDB6655	National Institute of Infectious Diseases	2018-4-11	n/a	major	Contig	full	CLC Genomic Workbench v. 9.0	158.8x	Illumina HiSeq 4000		GCA_003115015.1	GCF_003115015.1	yes	NC_000005.10	98.214	168	3.11e-77	292	bacteria
NZ_BFCQ01000142.1:1-127	Sat	NZ_BFCQ01000142.1	ALR	126	544	1	127	4.4e-33	122.2	11.2	Klebsiella pneumoniae strain MH15-289M, whole genome shotgun sequence		ASM311501v1	Klebsiella pneumoniae (enterobacteria)	strain=MH15-289M	573	SAMD00112932	PRJDB6655	National Institute of Infectious Diseases	2018-4-11	n/a	major	Contig	full	CLC Genomic Workbench v. 9.0	158.8x	Illumina HiSeq 4000		GCA_003115015.1	GCF_003115015.1	yes	NC_000009.12	99.213	127	1.74e-58	230	bacteria
NZ_BFCQ01000142.1:128-294	Sat	NZ_BFCQ01000142.1	ALR	170	544	128	294	2.2e-46	165.5	9	Klebsiella pneumoniae strain MH15-289M, whole genome shotgun sequence		ASM311501v1	Klebsiella pneumoniae (enterobacteria)	strain=MH15-289M	573	SAMD00112932	PRJDB6655	National Institute of Infectious Diseases	2018-4-11	n/a	major	Contig	full	CLC Genomic Workbench v. 9.0	158.8x	Illumina HiSeq 4000		GCA_003115015.1	GCF_003115015.1	yes	NC_000009.12	95.181	166	2.41e-68	263	bacteria
NZ_BFCQ01000142.1:295-465	Sat	NZ_BFCQ01000142.1	ALR	170	544	295	465	3.2e-53	187.8	6.3	Klebsiella pneumoniae strain MH15-289M, whole genome shotgun sequence		ASM311501v1	Klebsiella pneumoniae (enterobacteria)	strain=MH15-289M	573	SAMD00112932	PRJDB6655	National Institute of Infectious Diseases	2018-4-11	n/a	major	Contig	full	CLC Genomic Workbench v. 9.0	158.8x	Illumina HiSeq 4000		GCA_003115015.1	GCF_003115015.1	yes	NC_000015.10	97.661	171	8.78e-78	294	bacteria
NZ_BFCQ01000142.1:466-544	Sat	NZ_BFCQ01000142.1	ALR	78	544	466	544	1.5e-19	78.1	6.5	Klebsiella pneumoniae strain MH15-289M, whole genome shotgun sequence		ASM311501v1	Klebsiella pneumoniae (enterobacteria)	strain=MH15-289M	573	SAMD00112932	PRJDB6655	National Institute of Infectious Diseases	2018-4-11	n/a	major	Contig	full	CLC Genomic Workbench v. 9.0	158.8x	Illumina HiSeq 4000		GCA_003115015.1	GCF_003115015.1	yes	NC_000007.14	97.468	79	2.05e-30	135	bacteria
NZ_BFCQ01000143.1:1-92	Sat	NZ_BFCQ01000143.1	ALR	91	324	1	92	2.4e-22	87.2	3.7	Klebsiella pneumoniae strain MH15-289M, whole genome shotgun sequence		ASM311501v1	Klebsiella pneumoniae (enterobacteria)	strain=MH15-289M	573	SAMD00112932	PRJDB6655	National Institute of Infectious Diseases	2018-4-11	n/a	major	Contig	full	CLC Genomic Workbench v. 9.0	158.8x	Illumina HiSeq 4000		GCA_003115015.1	GCF_003115015.1	yes	NC_000020.11	98.913	92	3.26e-39	165	bacteria
NZ_BFCQ01000143.1:264-324	Sat	NZ_BFCQ01000143.1	ALR	60	324	264	324	9.3e-11	49.4	2.5	Klebsiella pneumoniae strain MH15-289M, whole genome shotgun sequence		ASM311501v1	Klebsiella pneumoniae (enterobacteria)	strain=MH15-289M	573	SAMD00112932	PRJDB6655	National Institute of Infectious Diseases	2018-4-11	n/a	major	Contig	full	CLC Genomic Workbench v. 9.0	158.8x	Illumina HiSeq 4000		GCA_003115015.1	GCF_003115015.1	yes	NC_000018.10	100	61	6.46e-24	113	bacteria
NZ_BFCQ01000143.1:93-263	Sat	NZ_BFCQ01000143.1	ALR	170	324	93	263	4.3e-49	174.3	11.7	Klebsiella pneumoniae strain MH15-289M, whole genome shotgun sequence		ASM311501v1	Klebsiella pneumoniae (enterobacteria)	strain=MH15-289M	573	SAMD00112932	PRJDB6655	National Institute of Infectious Diseases	2018-4-11	n/a	major	Contig	full	CLC Genomic Workbench v. 9.0	158.8x	Illumina HiSeq 4000		GCA_003115015.1	GCF_003115015.1	yes	NC_000009.12	98.83	171	4.05e-81	305	bacteria
NZ_BFCQ01000144.1:1-120	Sat	NZ_BFCQ01000144.1	ALR	113	398	120	1	4.9e-31	115.5	8.6	Klebsiella pneumoniae strain MH15-289M, whole genome shotgun sequence		ASM311501v1	Klebsiella pneumoniae (enterobacteria)	strain=MH15-289M	573	SAMD00112932	PRJDB6655	National Institute of Infectious Diseases	2018-4-11	n/a	major	Contig	full	CLC Genomic Workbench v. 9.0	158.8x	Illumina HiSeq 4000		GCA_003115015.1	GCF_003115015.1	yes	NC_000002.12	96.694	121	1.27e-49	200	bacteria
NZ_BFCQ01000144.1:121-291	Sat	NZ_BFCQ01000144.1	ALR	170	398	291	121	1.9e-49	175.5	6.2	Klebsiella pneumoniae strain MH15-289M, whole genome shotgun sequence		ASM311501v1	Klebsiella pneumoniae (enterobacteria)	strain=MH15-289M	573	SAMD00112932	PRJDB6655	National Institute of Infectious Diseases	2018-4-11	n/a	major	Contig	full	CLC Genomic Workbench v. 9.0	158.8x	Illumina HiSeq 4000		GCA_003115015.1	GCF_003115015.1	yes	NC_000018.10	97.661	171	8.78e-78	294	bacteria
NZ_BFCQ01000144.1:292-398	Sat	NZ_BFCQ01000144.1	ALR	108	398	398	292	1e-13	59.1	4.7	Klebsiella pneumoniae strain MH15-289M, whole genome shotgun sequence		ASM311501v1	Klebsiella pneumoniae (enterobacteria)	strain=MH15-289M	573	SAMD00112932	PRJDB6655	National Institute of Infectious Diseases	2018-4-11	n/a	major	Contig	full	CLC Genomic Workbench v. 9.0	158.8x	Illumina HiSeq 4000		GCA_003115015.1	GCF_003115015.1	yes	NC_000015.10	99.065	107	1.84e-47	193	bacteria
NZ_BFCQ01000145.1:266-407	HSATII	NZ_BFCQ01000145.1	HSATII	139	1051	407	266	1.6e-32	119.6	10.9	Klebsiella pneumoniae strain MH15-289M, whole genome shotgun sequence		ASM311501v1	Klebsiella pneumoniae (enterobacteria)	strain=MH15-289M	573	SAMD00112932	PRJDB6655	National Institute of Infectious Diseases	2018-4-11	n/a	major	Contig	full	CLC Genomic Workbench v. 9.0	158.8x	Illumina HiSeq 4000		GCA_003115015.1	GCF_003115015.1	yes	NC_000016.10	98.582	141	1.54e-64	250	bacteria
NZ_BFCQ01000145.1:529-675	HSATII	NZ_BFCQ01000145.1	HSATII	144	1051	675	529	4.8e-36	131.1	11.8	Klebsiella pneumoniae strain MH15-289M, whole genome shotgun sequence		ASM311501v1	Klebsiella pneumoniae (enterobacteria)	strain=MH15-289M	573	SAMD00112932	PRJDB6655	National Institute of Infectious Diseases	2018-4-11	n/a	major	Contig	full	CLC Genomic Workbench v. 9.0	158.8x	Illumina HiSeq 4000		GCA_003115015.1	GCF_003115015.1	yes	NC_000016.10	99.32	147	1.59e-69	267	bacteria
NZ_BFCQ01000145.1:676-826	HSATII	NZ_BFCQ01000145.1	HSATII	143	1051	826	676	6.6e-34	124.2	19.1	Klebsiella pneumoniae strain MH15-289M, whole genome shotgun sequence		ASM311501v1	Klebsiella pneumoniae (enterobacteria)	strain=MH15-289M	573	SAMD00112932	PRJDB6655	National Institute of Infectious Diseases	2018-4-11	n/a	major	Contig	full	CLC Genomic Workbench v. 9.0	158.8x	Illumina HiSeq 4000		GCA_003115015.1	GCF_003115015.1	yes	NC_000016.10	99.338	151	9.84e-72	274	bacteria
NZ_BFCQ01000145.1:71-213	HSATII	NZ_BFCQ01000145.1	HSATII	141	1051	213	71	1.9e-30	112.8	14.2	Klebsiella pneumoniae strain MH15-289M, whole genome shotgun sequence		ASM311501v1	Klebsiella pneumoniae (enterobacteria)	strain=MH15-289M	573	SAMD00112932	PRJDB6655	National Institute of Infectious Diseases	2018-4-11	n/a	major	Contig	full	CLC Genomic Workbench v. 9.0	158.8x	Illumina HiSeq 4000		GCA_003115015.1	GCF_003115015.1	yes	NC_000016.10	96.503	143	1.21e-60	237	bacteria
NZ_BFCQ01000145.1:919-1051	HSATII	NZ_BFCQ01000145.1	HSATII	130	1051	1051	919	2.3e-38	138.7	9.9	Klebsiella pneumoniae strain MH15-289M, whole genome shotgun sequence		ASM311501v1	Klebsiella pneumoniae (enterobacteria)	strain=MH15-289M	573	SAMD00112932	PRJDB6655	National Institute of Infectious Diseases	2018-4-11	n/a	major	Contig	full	CLC Genomic Workbench v. 9.0	158.8x	Illumina HiSeq 4000		GCA_003115015.1	GCF_003115015.1	yes	NC_000022.11	95.489	133	1.86e-53	213	bacteria
NZ_BFCQ01000146.1:1-163	Sat	NZ_BFCQ01000146.1	ALR	163	389	1	163	3.6e-38	138.7	5.8	Klebsiella pneumoniae strain MH15-289M, whole genome shotgun sequence		ASM311501v1	Klebsiella pneumoniae (enterobacteria)	strain=MH15-289M	573	SAMD00112932	PRJDB6655	National Institute of Infectious Diseases	2018-4-11	n/a	major	Contig	full	CLC Genomic Workbench v. 9.0	158.8x	Illumina HiSeq 4000		GCA_003115015.1	GCF_003115015.1	yes	NC_000017.11	100	163	4.95e-80	302	bacteria
NZ_BFCQ01000146.1:164-330	Sat	NZ_BFCQ01000146.1	ALR	168	389	164	330	4.4e-36	132	3.6	Klebsiella pneumoniae strain MH15-289M, whole genome shotgun sequence		ASM311501v1	Klebsiella pneumoniae (enterobacteria)	strain=MH15-289M	573	SAMD00112932	PRJDB6655	National Institute of Infectious Diseases	2018-4-11	n/a	major	Contig	full	CLC Genomic Workbench v. 9.0	158.8x	Illumina HiSeq 4000		GCA_003115015.1	GCF_003115015.1	yes	NC_000017.11	98.204	167	3.07e-77	292	bacteria
NZ_BFCQ01000146.1:331-389	Sat	NZ_BFCQ01000146.1	ALR	58	389	331	389	8.8e-13	56	4.9	Klebsiella pneumoniae strain MH15-289M, whole genome shotgun sequence		ASM311501v1	Klebsiella pneumoniae (enterobacteria)	strain=MH15-289M	573	SAMD00112932	PRJDB6655	National Institute of Infectious Diseases	2018-4-11	n/a	major	Contig	full	CLC Genomic Workbench v. 9.0	158.8x	Illumina HiSeq 4000		GCA_003115015.1	GCF_003115015.1	yes	NC_000002.12	100	59	7.87e-23	110	bacteria
NZ_BFCQ01000147.1:227-374	Sat	NZ_BFCQ01000147.1	ALR	148	374	374	227	3e-37	135.7	4.7	Klebsiella pneumoniae strain MH15-289M, whole genome shotgun sequence		ASM311501v1	Klebsiella pneumoniae (enterobacteria)	strain=MH15-289M	573	SAMD00112932	PRJDB6655	National Institute of Infectious Diseases	2018-4-11	n/a	major	Contig	full	CLC Genomic Workbench v. 9.0	158.8x	Illumina HiSeq 4000		GCA_003115015.1	GCF_003115015.1	yes	NC_000017.11	99.324	148	4.46e-70	268	bacteria
NZ_BFCQ01000147.1:56-226	Sat	NZ_BFCQ01000147.1	ALR	168	374	226	56	3.9e-45	161.4	6.2	Klebsiella pneumoniae strain MH15-289M, whole genome shotgun sequence		ASM311501v1	Klebsiella pneumoniae (enterobacteria)	strain=MH15-289M	573	SAMD00112932	PRJDB6655	National Institute of Infectious Diseases	2018-4-11	n/a	major	Contig	full	CLC Genomic Workbench v. 9.0	158.8x	Illumina HiSeq 4000		GCA_003115015.1	GCF_003115015.1	yes	NC_000017.11	97.041	169	5.28e-75	285	bacteria
NZ_BFCQ01000149.1:1-421	LINE	NZ_BFCQ01000149.1	L1P1_orf2	410	421	1	421	1.6e-88	301.4	49.5	Klebsiella pneumoniae strain MH15-289M, whole genome shotgun sequence		ASM311501v1	Klebsiella pneumoniae (enterobacteria)	strain=MH15-289M	573	SAMD00112932	PRJDB6655	National Institute of Infectious Diseases	2018-4-11	n/a	major	Contig	full	CLC Genomic Workbench v. 9.0	158.8x	Illumina HiSeq 4000		GCA_003115015.1	GCF_003115015.1	yes	NC_000014.9	90.215	419	6.02e-153	545	bacteria
NZ_BFCQ01000153.1:210-320	Sat	NZ_BFCQ01000153.1	ALR	110	320	210	320	6.9e-26	98.7	6.9	Klebsiella pneumoniae strain MH15-289M, whole genome shotgun sequence		ASM311501v1	Klebsiella pneumoniae (enterobacteria)	strain=MH15-289M	573	SAMD00112932	PRJDB6655	National Institute of Infectious Diseases	2018-4-11	n/a	major	Contig	full	CLC Genomic Workbench v. 9.0	158.8x	Illumina HiSeq 4000		GCA_003115015.1	GCF_003115015.1	yes	NC_000006.12	97.297	111	2.5e-46	189	bacteria
NZ_BFCQ01000153.1:40-208	Sat	NZ_BFCQ01000153.1	ALR	168	320	40	208	1.5e-36	133.5	7.9	Klebsiella pneumoniae strain MH15-289M, whole genome shotgun sequence		ASM311501v1	Klebsiella pneumoniae (enterobacteria)	strain=MH15-289M	573	SAMD00112932	PRJDB6655	National Institute of Infectious Diseases	2018-4-11	n/a	major	Contig	full	CLC Genomic Workbench v. 9.0	158.8x	Illumina HiSeq 4000		GCA_003115015.1	GCF_003115015.1	yes	NC_000006.12	100	169	2.39e-83	313	bacteria
NZ_BFCQ01000154.1:1-540	LTR	NZ_BFCQ01000154.1	ERVL	578	540	540	1	1.4e-131	442.3	20.2	Klebsiella pneumoniae strain MH15-289M, whole genome shotgun sequence	WP_108993220.1	ASM311501v1	Klebsiella pneumoniae (enterobacteria)	strain=MH15-289M	573	SAMD00112932	PRJDB6655	National Institute of Infectious Diseases	2018-4-11	n/a	major	Contig	full	CLC Genomic Workbench v. 9.0	158.8x	Illumina HiSeq 4000		GCA_003115015.1	GCF_003115015.1	yes	NC_000001.11	91.606	548	0	743	bacteria
NZ_BFCS01000146.1:1-155	HSATII	NZ_BFCS01000146.1	HSATII	152	447	155	1	2.5e-33	122.2	11.8	Klebsiella pneumoniae strain MH15-258M, whole genome shotgun sequence		ASM311505v1	Klebsiella pneumoniae (enterobacteria)	strain=MH15-258M	573	SAMD00112934	PRJDB6655	National Institute of Infectious Diseases	2018-4-11	n/a	major	Contig	full	CLC Genomic Workbench v. 9.0	444.1x	Illumina MiniSeq		GCA_003115055.1	GCF_003115055.1	yes	NC_000016.10	99.355	155	6.07e-74	281	bacteria
NZ_BFCS01000146.1:283-442	HSATII	NZ_BFCS01000146.1	HSATII	155	447	442	283	1.1e-34	126.6	11.1	Klebsiella pneumoniae strain MH15-258M, whole genome shotgun sequence		ASM311505v1	Klebsiella pneumoniae (enterobacteria)	strain=MH15-258M	573	SAMD00112934	PRJDB6655	National Institute of Infectious Diseases	2018-4-11	n/a	major	Contig	full	CLC Genomic Workbench v. 9.0	444.1x	Illumina MiniSeq		GCA_003115055.1	GCF_003115055.1	yes	NC_000016.10	98.742	159	1.75e-74	283	bacteria
NZ_BFCS01000168.1:1-169	HSATII	NZ_BFCS01000168.1	HSATII	165	739	1	169	1.5e-38	139.2	13.2	Klebsiella pneumoniae strain MH15-258M, whole genome shotgun sequence		ASM311505v1	Klebsiella pneumoniae (enterobacteria)	strain=MH15-258M	573	SAMD00112934	PRJDB6655	National Institute of Infectious Diseases	2018-4-11	n/a	major	Contig	full	CLC Genomic Workbench v. 9.0	444.1x	Illumina MiniSeq		GCA_003115055.1	GCF_003115055.1	yes	NC_000001.11	100	169	2.39e-83	313	bacteria
NZ_BFCS01000168.1:255-420	HSATII	NZ_BFCS01000168.1	HSATII	165	739	255	420	8.2e-39	140.1	16	Klebsiella pneumoniae strain MH15-258M, whole genome shotgun sequence		ASM311505v1	Klebsiella pneumoniae (enterobacteria)	strain=MH15-258M	573	SAMD00112934	PRJDB6655	National Institute of Infectious Diseases	2018-4-11	n/a	major	Contig	full	CLC Genomic Workbench v. 9.0	444.1x	Illumina MiniSeq		GCA_003115055.1	GCF_003115055.1	yes	NC_000001.11	100	166	1.09e-81	307	bacteria
NZ_BFCS01000168.1:467-639	HSATII	NZ_BFCS01000168.1	HSATII	169	739	467	639	1.5e-42	152.2	14.1	Klebsiella pneumoniae strain MH15-258M, whole genome shotgun sequence		ASM311505v1	Klebsiella pneumoniae (enterobacteria)	strain=MH15-258M	573	SAMD00112934	PRJDB6655	National Institute of Infectious Diseases	2018-4-11	n/a	major	Contig	full	CLC Genomic Workbench v. 9.0	444.1x	Illumina MiniSeq		GCA_003115055.1	GCF_003115055.1	yes	NC_000001.11	100	173	1.47e-85	320	bacteria
NZ_BFCS01000180.1:100-270	Sat	NZ_BFCS01000180.1	ALR	170	385	100	270	3.1e-44	158.4	12.5	Klebsiella pneumoniae strain MH15-258M, whole genome shotgun sequence	WP_109017678.1	ASM311505v1	Klebsiella pneumoniae (enterobacteria)	strain=MH15-258M	573	SAMD00112934	PRJDB6655	National Institute of Infectious Diseases	2018-4-11	n/a	major	Contig	full	CLC Genomic Workbench v. 9.0	444.1x	Illumina MiniSeq		GCA_003115055.1	GCF_003115055.1	yes	NC_000009.12	98.83	171	4.05e-81	305	bacteria
NZ_BFCS01000180.1:1-99	Sat	NZ_BFCS01000180.1	ALR	98	385	1	99	2e-18	74.4	5.3	Klebsiella pneumoniae strain MH15-258M, whole genome shotgun sequence	WP_109017678.1	ASM311505v1	Klebsiella pneumoniae (enterobacteria)	strain=MH15-258M	573	SAMD00112934	PRJDB6655	National Institute of Infectious Diseases	2018-4-11	n/a	major	Contig	full	CLC Genomic Workbench v. 9.0	444.1x	Illumina MiniSeq		GCA_003115055.1	GCF_003115055.1	yes	NC_000004.12	96.97	99	1.01e-39	167	bacteria
NZ_BFCS01000180.1:271-385	Sat	NZ_BFCS01000180.1	ALR	113	385	271	385	3.2e-25	96.5	3.5	Klebsiella pneumoniae strain MH15-258M, whole genome shotgun sequence	WP_109017678.1	ASM311505v1	Klebsiella pneumoniae (enterobacteria)	strain=MH15-258M	573	SAMD00112934	PRJDB6655	National Institute of Infectious Diseases	2018-4-11	n/a	major	Contig	full	CLC Genomic Workbench v. 9.0	444.1x	Illumina MiniSeq		GCA_003115055.1	GCF_003115055.1	yes	NC_000004.12	98.276	116	3.37e-50	202	bacteria
NZ_BFCS01000203.1:1-77	Sat	NZ_BFCS01000203.1	ALR	76	544	1	77	2.9e-15	64	5.6	Klebsiella pneumoniae strain MH15-258M, whole genome shotgun sequence		ASM311505v1	Klebsiella pneumoniae (enterobacteria)	strain=MH15-258M	573	SAMD00112934	PRJDB6655	National Institute of Infectious Diseases	2018-4-11	n/a	major	Contig	full	CLC Genomic Workbench v. 9.0	444.1x	Illumina MiniSeq		GCA_003115055.1	GCF_003115055.1	yes	NC_000010.11	95.946	74	5.51e-26	121	bacteria
NZ_BFCS01000203.1:249-419	Sat	NZ_BFCS01000203.1	ALR	170	544	249	419	4.8e-43	154.6	3.5	Klebsiella pneumoniae strain MH15-258M, whole genome shotgun sequence		ASM311505v1	Klebsiella pneumoniae (enterobacteria)	strain=MH15-258M	573	SAMD00112934	PRJDB6655	National Institute of Infectious Diseases	2018-4-11	n/a	major	Contig	full	CLC Genomic Workbench v. 9.0	444.1x	Illumina MiniSeq		GCA_003115055.1	GCF_003115055.1	yes	NC_000004.12	97.661	171	8.78e-78	294	bacteria
NZ_BFCS01000203.1:420-544	Sat	NZ_BFCS01000203.1	ALR	124	544	420	544	2.2e-33	123.1	6.5	Klebsiella pneumoniae strain MH15-258M, whole genome shotgun sequence		ASM311505v1	Klebsiella pneumoniae (enterobacteria)	strain=MH15-258M	573	SAMD00112934	PRJDB6655	National Institute of Infectious Diseases	2018-4-11	n/a	major	Contig	full	CLC Genomic Workbench v. 9.0	444.1x	Illumina MiniSeq		GCA_003115055.1	GCF_003115055.1	yes	NC_000004.12	98.4	125	1.02e-55	220	bacteria
NZ_BFCS01000203.1:79-248	Sat	NZ_BFCS01000203.1	ALR	170	544	79	248	1.3e-42	153.2	8	Klebsiella pneumoniae strain MH15-258M, whole genome shotgun sequence		ASM311505v1	Klebsiella pneumoniae (enterobacteria)	strain=MH15-258M	573	SAMD00112934	PRJDB6655	National Institute of Infectious Diseases	2018-4-11	n/a	major	Contig	full	CLC Genomic Workbench v. 9.0	444.1x	Illumina MiniSeq		GCA_003115055.1	GCF_003115055.1	yes	NC_000004.12	93.452	168	1.91e-64	250	bacteria
NZ_BFCS01000225.1:23-330	Alu	NZ_BFCS01000225.1	AluY	306	549	330	23	2.4e-106	362.4	15.9	Klebsiella pneumoniae strain MH15-258M, whole genome shotgun sequence		ASM311505v1	Klebsiella pneumoniae (enterobacteria)	strain=MH15-258M	573	SAMD00112934	PRJDB6655	National Institute of Infectious Diseases	2018-4-11	n/a	major	Contig	full	CLC Genomic Workbench v. 9.0	444.1x	Illumina MiniSeq		GCA_003115055.1	GCF_003115055.1	yes	NC_000021.9	98.052	308	1.2e-148	531	bacteria
NZ_BFCS01000233.1:34-232	HSATII	NZ_BFCS01000233.1	HSATII	165	522	232	34	3.2e-13	56.7	30.1	Klebsiella pneumoniae strain MH15-258M, whole genome shotgun sequence		ASM311505v1	Klebsiella pneumoniae (enterobacteria)	strain=MH15-258M	573	SAMD00112934	PRJDB6655	National Institute of Infectious Diseases	2018-4-11	n/a	major	Contig	full	CLC Genomic Workbench v. 9.0	444.1x	Illumina MiniSeq		GCA_003115055.1	GCF_003115055.1	yes	NC_000024.10	100	199	6.1e-100	368	bacteria
NZ_BFCS01000233.1:352-522	HSATII	NZ_BFCS01000233.1	HSATII	162	522	522	352	7.8e-15	62	17.5	Klebsiella pneumoniae strain MH15-258M, whole genome shotgun sequence		ASM311505v1	Klebsiella pneumoniae (enterobacteria)	strain=MH15-258M	573	SAMD00112934	PRJDB6655	National Institute of Infectious Diseases	2018-4-11	n/a	major	Contig	full	CLC Genomic Workbench v. 9.0	444.1x	Illumina MiniSeq		GCA_003115055.1	GCF_003115055.1	yes	NC_000024.10	98.83	171	4.05e-81	305	bacteria
NZ_BFCS01000259.1:1-512	LINE	NZ_BFCS01000259.1	L1P1_orf2	511	512	1	512	3e-192	645.5	31	Klebsiella pneumoniae strain MH15-258M, whole genome shotgun sequence		ASM311505v1	Klebsiella pneumoniae (enterobacteria)	strain=MH15-258M	573	SAMD00112934	PRJDB6655	National Institute of Infectious Diseases	2018-4-11	n/a	major	Contig	full	CLC Genomic Workbench v. 9.0	444.1x	Illumina MiniSeq		GCA_003115055.1	GCF_003115055.1	yes	NC_000002.12	99.023	512	0	918	bacteria
NZ_BFCS01000274.1:1-112	LINE	NZ_BFCS01000274.1	L1HS_5end	91	533	1	112	2e-20	76.5	8	Klebsiella pneumoniae strain MH15-258M, whole genome shotgun sequence		ASM311505v1	Klebsiella pneumoniae (enterobacteria)	strain=MH15-258M	573	SAMD00112934	PRJDB6655	National Institute of Infectious Diseases	2018-4-11	n/a	major	Contig	full	CLC Genomic Workbench v. 9.0	444.1x	Illumina MiniSeq		GCA_003115055.1	GCF_003115055.1	yes	NC_000003.12	99.107	112	3.25e-50	202	bacteria
NZ_BFCS01000274.1:195-533	LINE	NZ_BFCS01000274.1	L1HS_5end	318	533	195	533	2.8e-108	367.9	30.6	Klebsiella pneumoniae strain MH15-258M, whole genome shotgun sequence		ASM311505v1	Klebsiella pneumoniae (enterobacteria)	strain=MH15-258M	573	SAMD00112934	PRJDB6655	National Institute of Infectious Diseases	2018-4-11	n/a	major	Contig	full	CLC Genomic Workbench v. 9.0	444.1x	Illumina MiniSeq		GCA_003115055.1	GCF_003115055.1	yes	NC_000003.12	97.64	339	3.63e-164	582	bacteria
NZ_BFCS01000275.1:1-199	Alu	NZ_BFCS01000275.1	AluY	197	329	199	1	1.4e-70	244.8	9.2	Klebsiella pneumoniae strain MH15-258M, whole genome shotgun sequence		ASM311505v1	Klebsiella pneumoniae (enterobacteria)	strain=MH15-258M	573	SAMD00112934	PRJDB6655	National Institute of Infectious Diseases	2018-4-11	n/a	major	Contig	full	CLC Genomic Workbench v. 9.0	444.1x	Illumina MiniSeq		GCA_003115055.1	GCF_003115055.1	yes	NC_000001.11	99.497	199	2.84e-98	363	bacteria
NZ_BFCS01000276.1:159-466	Alu	NZ_BFCS01000276.1	AluSz	300	475	466	159	1.2e-70	244.8	13.3	Klebsiella pneumoniae strain MH15-258M, whole genome shotgun sequence		ASM311505v1	Klebsiella pneumoniae (enterobacteria)	strain=MH15-258M	573	SAMD00112934	PRJDB6655	National Institute of Infectious Diseases	2018-4-11	n/a	major	Contig	full	CLC Genomic Workbench v. 9.0	444.1x	Illumina MiniSeq		GCA_003115055.1	GCF_003115055.1	yes	NC_000021.9	97.727	308	4.31e-148	529	bacteria
NZ_BFCS01000277.1:1-73	Sat	NZ_BFCS01000277.1	ALR	72	868	73	1	6.3e-14	59.7	6.2	Klebsiella pneumoniae strain MH15-258M, whole genome shotgun sequence		ASM311505v1	Klebsiella pneumoniae (enterobacteria)	strain=MH15-258M	573	SAMD00112934	PRJDB6655	National Institute of Infectious Diseases	2018-4-11	n/a	major	Contig	full	CLC Genomic Workbench v. 9.0	444.1x	Illumina MiniSeq		GCA_003115055.1	GCF_003115055.1	yes	NC_000002.12	97.26	73	3.92e-27	124	bacteria
NZ_BFCS01000277.1:245-411	Sat	NZ_BFCS01000277.1	ALR	169	868	411	245	8.2e-35	127.7	8.9	Klebsiella pneumoniae strain MH15-258M, whole genome shotgun sequence		ASM311505v1	Klebsiella pneumoniae (enterobacteria)	strain=MH15-258M	573	SAMD00112934	PRJDB6655	National Institute of Infectious Diseases	2018-4-11	n/a	major	Contig	full	CLC Genomic Workbench v. 9.0	444.1x	Illumina MiniSeq		GCA_003115055.1	GCF_003115055.1	yes	NC_000002.12	100	167	3.05e-82	309	bacteria
NZ_BFCS01000277.1:412-582	Sat	NZ_BFCS01000277.1	ALR	170	868	582	412	2e-41	149.3	6.7	Klebsiella pneumoniae strain MH15-258M, whole genome shotgun sequence		ASM311505v1	Klebsiella pneumoniae (enterobacteria)	strain=MH15-258M	573	SAMD00112934	PRJDB6655	National Institute of Infectious Diseases	2018-4-11	n/a	major	Contig	full	CLC Genomic Workbench v. 9.0	444.1x	Illumina MiniSeq		GCA_003115055.1	GCF_003115055.1	yes	NC_000002.12	99.415	171	8.71e-83	311	bacteria
NZ_BFCS01000277.1:583-753	Sat	NZ_BFCS01000277.1	ALR	170	868	753	583	2.9e-48	171.5	8.9	Klebsiella pneumoniae strain MH15-258M, whole genome shotgun sequence		ASM311505v1	Klebsiella pneumoniae (enterobacteria)	strain=MH15-258M	573	SAMD00112934	PRJDB6655	National Institute of Infectious Diseases	2018-4-11	n/a	major	Contig	full	CLC Genomic Workbench v. 9.0	444.1x	Illumina MiniSeq		GCA_003115055.1	GCF_003115055.1	yes	NC_000002.12	97.661	171	8.78e-78	294	bacteria
NZ_BFCS01000277.1:74-244	Sat	NZ_BFCS01000277.1	ALR	170	868	244	74	2.4e-48	171.8	5.2	Klebsiella pneumoniae strain MH15-258M, whole genome shotgun sequence		ASM311505v1	Klebsiella pneumoniae (enterobacteria)	strain=MH15-258M	573	SAMD00112934	PRJDB6655	National Institute of Infectious Diseases	2018-4-11	n/a	major	Contig	full	CLC Genomic Workbench v. 9.0	444.1x	Illumina MiniSeq		GCA_003115055.1	GCF_003115055.1	yes	NC_000002.12	98.246	171	1.89e-79	300	bacteria
NZ_BFCS01000277.1:754-868	Sat	NZ_BFCS01000277.1	ALR	113	868	868	754	1.7e-29	110.4	4.7	Klebsiella pneumoniae strain MH15-258M, whole genome shotgun sequence		ASM311505v1	Klebsiella pneumoniae (enterobacteria)	strain=MH15-258M	573	SAMD00112934	PRJDB6655	National Institute of Infectious Diseases	2018-4-11	n/a	major	Contig	full	CLC Genomic Workbench v. 9.0	444.1x	Illumina MiniSeq		GCA_003115055.1	GCF_003115055.1	yes	NC_000002.12	97.391	115	1.57e-48	196	bacteria
NZ_BFCS01000279.1:1-162	Sat	NZ_BFCS01000279.1	ALR	161	760	162	1	4.3e-43	154.7	5.6	Klebsiella pneumoniae strain MH15-258M, whole genome shotgun sequence		ASM311505v1	Klebsiella pneumoniae (enterobacteria)	strain=MH15-258M	573	SAMD00112934	PRJDB6655	National Institute of Infectious Diseases	2018-4-11	n/a	major	Contig	full	CLC Genomic Workbench v. 9.0	444.1x	Illumina MiniSeq		GCA_003115055.1	GCF_003115055.1	yes	NC_000013.11	95.679	162	8.34e-68	261	bacteria
NZ_BFCS01000279.1:163-329	Sat	NZ_BFCS01000279.1	ALR	170	760	329	163	1.8e-41	149.4	7.9	Klebsiella pneumoniae strain MH15-258M, whole genome shotgun sequence		ASM311505v1	Klebsiella pneumoniae (enterobacteria)	strain=MH15-258M	573	SAMD00112934	PRJDB6655	National Institute of Infectious Diseases	2018-4-11	n/a	major	Contig	full	CLC Genomic Workbench v. 9.0	444.1x	Illumina MiniSeq		GCA_003115055.1	GCF_003115055.1	yes	NC_000013.11	96.407	167	3.09e-72	276	bacteria
[truncated: 12,763 more rows]

## Sheet: README
	Supplemental Table S1: Results of human repeat profile searches against bacterial and archaeal genomes
	Column name	Example	Description
1	qseqid	NZ_ADGY01000056.1:5-142	Contig AC including from and to position for profile match
2	Profile1	LTR	Category of profile (ALU, LINE, LTR, Sat, …)
[truncated: 36 more rows]
