# Supplementary material for: Human contamination in bacterial genomes has created thousands of spurious proteins
Source: HighWire-hosted journal article supplement (doi:10.1101/gr.245373.118), 2019-05-07
Supplement: Supplemental_Table_S2.xlsx [file Supplemental_Table_S2.xlsx]

## Sheet: Sheet1
SequenceAccession	SequenceLen	HumanPercId	HumanPercLen	Proteins	AssemblyName	OrganismName	InfraspecificName	Taxid	BioSample	BioProject	Submitter	Date	AssemblyType	ReleaseType	AssemblyLevel	GenomeRepresentation	AssemblyMethod	GenomeCoverage	SequencingTechnology	RefSeqCategory	GenBankAssemblyAccession	RefSeqAssemblyAccession	RefSeqAssemblyAndGenBankAssembliesIdentical
NZ_AACK01000135.1	218	99.54	100		ASM16709v1	Actinobacillus pleuropneumoniae serovar 1 str. 4074 (g-proteobacteria)	strain=4074	228399	SAMN02471910	PRJNA198	Univ. Oklahoma	2003-4-21	n/a	major	Scaffold	full					GCA_000167095.1	GCF_000167095.1	yes
NZ_AAWE01000368.1	228	99.56	100		ASM15396v1	Vibrio cholerae B33 (g-proteobacteria)	strain=B33	417400	SAMN02471145	PRJNA18499	TIGR	2007-1-22	n/a	major	Scaffold	full					GCA_000153965.1	GCF_000153965.1	yes
NZ_ABDQ01000076.1	260	100	100		ASM17109v1	Clostridium botulinum C str. Eklund (firmicutes)	strain=Eklund	445337	SAMN02436293	PRJNA20017	J. Craig Venter Institute	2007-7-11	n/a	major	Contig	full					GCA_000171095.1	GCF_000171095.1	yes
NZ_ABFA01000546.1	111	99.1	100		ASM17143v1	Staphylococcus aureus 930918-3 (firmicutes)	strain=930918-3	452948	SAMN02471355	PRJNA20007	University of Central Florida	2009-9-24	n/a	major	Contig	full					GCA_000171435.1	GCF_000171435.1	yes
NZ_ABFA01000710.1	98	100	100		ASM17143v1	Staphylococcus aureus 930918-3 (firmicutes)	strain=930918-3	452948	SAMN02471355	PRJNA20007	University of Central Florida	2009-9-24	n/a	major	Contig	full					GCA_000171435.1	GCF_000171435.1	yes
NZ_ABFB01000339.1	110	100	100		ASM17145v1	Staphylococcus aureus D30 (firmicutes)	strain=D30	455227	SAMN02471356	PRJNA19993	University of Central Florida	2009-9-24	n/a	major	Contig	full					GCA_000171455.1	GCF_000171455.1	yes
NZ_ABFB01000342.1	110	99.07	97.27		ASM17145v1	Staphylococcus aureus D30 (firmicutes)	strain=D30	455227	SAMN02471356	PRJNA19993	University of Central Florida	2009-9-24	n/a	major	Contig	full					GCA_000171455.1	GCF_000171455.1	yes
NZ_ABFB01000407.1	104	100	100		ASM17145v1	Staphylococcus aureus D30 (firmicutes)	strain=D30	455227	SAMN02471356	PRJNA19993	University of Central Florida	2009-9-24	n/a	major	Contig	full					GCA_000171455.1	GCF_000171455.1	yes
NZ_ABFB01000458.1	93	98.94	100		ASM17145v1	Staphylococcus aureus D30 (firmicutes)	strain=D30	455227	SAMN02471356	PRJNA19993	University of Central Florida	2009-9-24	n/a	major	Contig	full					GCA_000171455.1	GCF_000171455.1	yes
NZ_ABGO01000697.1	991	99.8	100		ASM17177v1	Gemmata obscuriglobus UQM 2246 (planctomycetes)	strain=UQM 2246	214688	SAMN02436172	PRJNA20997	J. Craig Venter Institute	2007-10-23	n/a	major	Contig	full				Representative Genome	GCA_000171775.1	GCF_000171775.1	yes
NZ_ABGO01000719.1	863	99.3	100		ASM17177v1	Gemmata obscuriglobus UQM 2246 (planctomycetes)	strain=UQM 2246	214688	SAMN02436172	PRJNA20997	J. Craig Venter Institute	2007-10-23	n/a	major	Contig	full				Representative Genome	GCA_000171775.1	GCF_000171775.1	yes
NZ_ABGO01000720.1	861	99.77	100		ASM17177v1	Gemmata obscuriglobus UQM 2246 (planctomycetes)	strain=UQM 2246	214688	SAMN02436172	PRJNA20997	J. Craig Venter Institute	2007-10-23	n/a	major	Contig	full				Representative Genome	GCA_000171775.1	GCF_000171775.1	yes
NZ_ABGO01000740.1	814	100	100		ASM17177v1	Gemmata obscuriglobus UQM 2246 (planctomycetes)	strain=UQM 2246	214688	SAMN02436172	PRJNA20997	J. Craig Venter Institute	2007-10-23	n/a	major	Contig	full				Representative Genome	GCA_000171775.1	GCF_000171775.1	yes
NZ_ABGO01000747.1	800	99.5	100		ASM17177v1	Gemmata obscuriglobus UQM 2246 (planctomycetes)	strain=UQM 2246	214688	SAMN02436172	PRJNA20997	J. Craig Venter Institute	2007-10-23	n/a	major	Contig	full				Representative Genome	GCA_000171775.1	GCF_000171775.1	yes
NZ_ABGO01000749.1	796	100	100		ASM17177v1	Gemmata obscuriglobus UQM 2246 (planctomycetes)	strain=UQM 2246	214688	SAMN02436172	PRJNA20997	J. Craig Venter Institute	2007-10-23	n/a	major	Contig	full				Representative Genome	GCA_000171775.1	GCF_000171775.1	yes
NZ_ABGO01000752.1	792	99.87	100		ASM17177v1	Gemmata obscuriglobus UQM 2246 (planctomycetes)	strain=UQM 2246	214688	SAMN02436172	PRJNA20997	J. Craig Venter Institute	2007-10-23	n/a	major	Contig	full				Representative Genome	GCA_000171775.1	GCF_000171775.1	yes
NZ_ABGO01000772.1	754	100	100		ASM17177v1	Gemmata obscuriglobus UQM 2246 (planctomycetes)	strain=UQM 2246	214688	SAMN02436172	PRJNA20997	J. Craig Venter Institute	2007-10-23	n/a	major	Contig	full				Representative Genome	GCA_000171775.1	GCF_000171775.1	yes
NZ_ABGO01000774.1	753	99.73	100		ASM17177v1	Gemmata obscuriglobus UQM 2246 (planctomycetes)	strain=UQM 2246	214688	SAMN02436172	PRJNA20997	J. Craig Venter Institute	2007-10-23	n/a	major	Contig	full				Representative Genome	GCA_000171775.1	GCF_000171775.1	yes
NZ_ABGO01000791.1	732	99.86	100		ASM17177v1	Gemmata obscuriglobus UQM 2246 (planctomycetes)	strain=UQM 2246	214688	SAMN02436172	PRJNA20997	J. Craig Venter Institute	2007-10-23	n/a	major	Contig	full				Representative Genome	GCA_000171775.1	GCF_000171775.1	yes
NZ_ABGO01000801.1	703	100	100		ASM17177v1	Gemmata obscuriglobus UQM 2246 (planctomycetes)	strain=UQM 2246	214688	SAMN02436172	PRJNA20997	J. Craig Venter Institute	2007-10-23	n/a	major	Contig	full				Representative Genome	GCA_000171775.1	GCF_000171775.1	yes
NZ_ABGO01000817.1	676	100	100		ASM17177v1	Gemmata obscuriglobus UQM 2246 (planctomycetes)	strain=UQM 2246	214688	SAMN02436172	PRJNA20997	J. Craig Venter Institute	2007-10-23	n/a	major	Contig	full				Representative Genome	GCA_000171775.1	GCF_000171775.1	yes
NZ_ABGO01000856.1	572	99.65	100		ASM17177v1	Gemmata obscuriglobus UQM 2246 (planctomycetes)	strain=UQM 2246	214688	SAMN02436172	PRJNA20997	J. Craig Venter Institute	2007-10-23	n/a	major	Contig	full				Representative Genome	GCA_000171775.1	GCF_000171775.1	yes
NZ_ABGO01000919.1	214	100	100		ASM17177v1	Gemmata obscuriglobus UQM 2246 (planctomycetes)	strain=UQM 2246	214688	SAMN02436172	PRJNA20997	J. Craig Venter Institute	2007-10-23	n/a	major	Contig	full				Representative Genome	GCA_000171775.1	GCF_000171775.1	yes
NZ_ABHO01000186.1	236	100	100		ASM17191v1	Escherichia coli O157:H7 str. EC4196 (E. coli)	strain=EC4196	444451	SAMN02436280	PRJNA27741	J. Craig Venter Institute	2007-11-8	n/a	major	Contig	full					GCA_000171915.1	GCF_000171915.1	yes
NZ_ABVX01000827.1	104	100	100		ASM17313v1	Pectobacterium carotovorum subsp. brasiliensis PBR1692 (enterobacteria)	strain=PBR1692	558269	SAMN02472014	PRJNA31121	University of Wisconsin	2008-9-9	n/a	major	Contig	full					GCA_000173135.1	GCF_000173135.1	yes
NZ_ACEO02000062.1	505	99.8	96.63	WP_004521165.1	ASM17395v1	Neisseria subflava NJ9703 (b-proteobacteria)	strain=NJ9703	546268	SAMN00008843	PRJNA30483	Washington University Genome Sequencing Center	2009-10-5	n/a	major	Contig	full				Representative Genome	GCA_000173955.1	GCF_000173955.1	yes
NZ_ACFY01000068.1	523	97.14	93.31		ASM17419v1	Roseburia inulinivorans DSM 16841 (firmicutes)	strain=DSM 16841	622312	SAMN00008857	PRJNA30757	Washington University Genome Sequencing Center	2009-3-12	n/a	major	Contig	full				Representative Genome	GCA_000174195.1	GCF_000174195.1	yes
NZ_ACFY01000079.1	541	99.44	99.82	WP_007885451.1	ASM17419v1	Roseburia inulinivorans DSM 16841 (firmicutes)	strain=DSM 16841	622312	SAMN00008857	PRJNA30757	Washington University Genome Sequencing Center	2009-3-12	n/a	major	Contig	full				Representative Genome	GCA_000174195.1	GCF_000174195.1	yes
NZ_ACFY01000081.1	502	99.38	96.02		ASM17419v1	Roseburia inulinivorans DSM 16841 (firmicutes)	strain=DSM 16841	622312	SAMN00008857	PRJNA30757	Washington University Genome Sequencing Center	2009-3-12	n/a	major	Contig	full				Representative Genome	GCA_000174195.1	GCF_000174195.1	yes
NZ_ADJX01000024.1	535	99.44	100		ASM211024v1	Escherichia coli H605 (E. coli)	strain=H605	656410	SAMN06392855	PRJNA39025	Broad Institute	2017-4-25	n/a	major	Scaffold	full	unknown v. unknown	37.88x	454		GCA_002110245.1	GCF_002110245.1	yes
NZ_ADJX01000026.1	517	100	100		ASM211024v1	Escherichia coli H605 (E. coli)	strain=H605	656410	SAMN06392855	PRJNA39025	Broad Institute	2017-4-25	n/a	major	Scaffold	full	unknown v. unknown	37.88x	454		GCA_002110245.1	GCF_002110245.1	yes
NZ_ADJX01000029.1	501	99.8	100		ASM211024v1	Escherichia coli H605 (E. coli)	strain=H605	656410	SAMN06392855	PRJNA39025	Broad Institute	2017-4-25	n/a	major	Scaffold	full	unknown v. unknown	37.88x	454		GCA_002110245.1	GCF_002110245.1	yes
NZ_ADKT01000122.1	107	100	100		ASM19355v2	Bordetella pertussis B1831 (b-proteobacteria)	strain=B1831	743275	SAMN02470859	PRJNA46273	RIVM	2010-11-9	n/a	major	Contig	full		26x	454		GCA_000193555.2	GCF_000193555.1	yes
NZ_ADKT01000129.1	105	100	100		ASM19355v2	Bordetella pertussis B1831 (b-proteobacteria)	strain=B1831	743275	SAMN02470859	PRJNA46273	RIVM	2010-11-9	n/a	major	Contig	full		26x	454		GCA_000193555.2	GCF_000193555.1	yes
NZ_ADKT01000206.1	111	100	100		ASM19355v2	Bordetella pertussis B1831 (b-proteobacteria)	strain=B1831	743275	SAMN02470859	PRJNA46273	RIVM	2010-11-9	n/a	major	Contig	full		26x	454		GCA_000193555.2	GCF_000193555.1	yes
NZ_ADKT01000234.1	100	100	100		ASM19355v2	Bordetella pertussis B1831 (b-proteobacteria)	strain=B1831	743275	SAMN02470859	PRJNA46273	RIVM	2010-11-9	n/a	major	Contig	full		26x	454		GCA_000193555.2	GCF_000193555.1	yes
NZ_ADKT01000245.1	93	100	100		ASM19355v2	Bordetella pertussis B1831 (b-proteobacteria)	strain=B1831	743275	SAMN02470859	PRJNA46273	RIVM	2010-11-9	n/a	major	Contig	full		26x	454		GCA_000193555.2	GCF_000193555.1	yes
NZ_ADKT01000281.1	112	100	99.11		ASM19355v2	Bordetella pertussis B1831 (b-proteobacteria)	strain=B1831	743275	SAMN02470859	PRJNA46273	RIVM	2010-11-9	n/a	major	Contig	full		26x	454		GCA_000193555.2	GCF_000193555.1	yes
NZ_ADKT01000291.1	108	100	100		ASM19355v2	Bordetella pertussis B1831 (b-proteobacteria)	strain=B1831	743275	SAMN02470859	PRJNA46273	RIVM	2010-11-9	n/a	major	Contig	full		26x	454		GCA_000193555.2	GCF_000193555.1	yes
NZ_ADKT01000297.1	122	98.35	99.18		ASM19355v2	Bordetella pertussis B1831 (b-proteobacteria)	strain=B1831	743275	SAMN02470859	PRJNA46273	RIVM	2010-11-9	n/a	major	Contig	full		26x	454		GCA_000193555.2	GCF_000193555.1	yes
NZ_ADKU01000185.1	108	100	97.22		ASM19357v2	Bordetella pertussis B1834 (b-proteobacteria)	strain=B1834	743276	SAMN02470860	PRJNA46275	RIVM	2010-11-9	n/a	major	Contig	full		25x	454		GCA_000193575.2	GCF_000193575.1	yes
NZ_ADUX01000105.1	90	100	98.89		ASM17869v1	Escherichia coli O157:H7 str. EC4192 (E. coli)	strain=EC4192	702431	SAMN02470602	PRJNA42811	National Bioforensic Analysis Center	2010-5-11	n/a	major	Contig	full	Newbler v. 1.0.53.17	0.94	454		GCA_000178695.1	GCF_000178695.1	yes
NZ_ADUZ01000121.1	89	100	100		ASM17873v1	Escherichia coli O157:H7 str. EC4127 (E. coli)	strain=EC4127	702433	SAMN02470605	PRJNA42815	National Bioforensic Analysis Center	2010-5-11	n/a	major	Contig	full	Newbler v. 1.0.53.17	0.93	454		GCA_000178735.1	GCF_000178735.1	yes
NZ_ADUZ01000182.1	92	100	100		ASM17873v1	Escherichia coli O157:H7 str. EC4127 (E. coli)	strain=EC4127	702433	SAMN02470605	PRJNA42815	National Bioforensic Analysis Center	2010-5-11	n/a	major	Contig	full	Newbler v. 1.0.53.17	0.93	454		GCA_000178735.1	GCF_000178735.1	yes
NZ_ADVC01000131.1	94	100	100		ASM17879v1	Escherichia coli O157:H7 str. EC536 (E. coli)	strain=EC536	702436	SAMN02470599	PRJNA42821	National Bioforensic Analysis Center	2010-5-11	n/a	major	Contig	full	Newbler v. 1.0.53.17	0.93	454		GCA_000178795.1	GCF_000178795.1	yes
NZ_ADVC01000257.1	98	98.99	100		ASM17879v1	Escherichia coli O157:H7 str. EC536 (E. coli)	strain=EC536	702436	SAMN02470599	PRJNA42821	National Bioforensic Analysis Center	2010-5-11	n/a	major	Contig	full	Newbler v. 1.0.53.17	0.93	454		GCA_000178795.1	GCF_000178795.1	yes
NZ_AEUN01000315.1	101	100	99.01		ASM23564v1	Staphylococcus simiae CCM 7213 (firmicutes)	strain=CCM 7213	911238	SAMN02428990	PRJNA59589	Cornell University	2011-11-16	n/a	major	Contig	full	Newbler v. 08/08/2006	27x	454 GS FLX	Representative Genome	GCA_000235645.2	GCF_000235645.1	yes
NZ_AFIE01000131.1	1019	99.71	100		ASM21413v1	Acinetobacter sp. P8-3-8 (g-proteobacteria)	strain=P8-3-8	1029823	SAMN02470194	PRJNA66629	Genome Resource Center	2011-5-19	n/a	major	Contig	full	Newbler assembler v. 2.3	26x	454 GS FLX Titanium		GCA_000214135.2	GCF_000214135.1	yes
NZ_AFIE01000139.1	810	99.63	100		ASM21413v1	Acinetobacter sp. P8-3-8 (g-proteobacteria)	strain=P8-3-8	1029823	SAMN02470194	PRJNA66629	Genome Resource Center	2011-5-19	n/a	major	Contig	full	Newbler assembler v. 2.3	26x	454 GS FLX Titanium		GCA_000214135.2	GCF_000214135.1	yes
NZ_AKRO01000019.1	228	100	92.54		ASM26856v1	Yersinia pestis PY-03 (enterobacteria)	strain=PY-03	992129	SAMN02141450	PRJNA64285	Institute for Genome Sciences	2012-6-15	n/a	major	Contig	full	Velvet v. 1.1.04	57x	Illumina		GCA_000268565.1	GCF_000268565.1	yes
NZ_AKVP01000090.1	1417	97.72	100		ASM29931v2	Microbacterium barkeri 2011-R4 (high GC Gram+)	strain=2011-R4	1197720	SAMN02472166	PRJNA168054	Zhejiang University	2012-9-26	n/a		Contig	full	IDBA-UD v. 1.0.9	1000.0x	Illumina HiSeq	Representative Genome	GCA_000299315.2	GCF_000299315.2	yes
NZ_AKZK01000116.1	260	100	100		LactoDSM15814_V1	Lactobacillus rossiae DSM 15814 (firmicutes)	strain=DSM 15814	1114972	SAMN02471396	PRJNA165045	Department of Biologia e Università di Bari-Dipartimenti Chimica Agro-Forestale ed Ambientale	2012-7-23	n/a	major	Scaffold	full	CLC Genomics Workbench v. 5.01	1000.0x	Illumina HiSeq		GCA_000277855.1	GCF_000277855.1	yes
NZ_AKZK01000205.1	639	100	100		LactoDSM15814_V1	Lactobacillus rossiae DSM 15814 (firmicutes)	strain=DSM 15814	1114972	SAMN02471396	PRJNA165045	Department of Biologia e Università di Bari-Dipartimenti Chimica Agro-Forestale ed Ambientale	2012-7-23	n/a	major	Scaffold	full	CLC Genomics Workbench v. 5.01	1000.0x	Illumina HiSeq		GCA_000277855.1	GCF_000277855.1	yes
NZ_AKZK01000259.1	319	98.43	100		LactoDSM15814_V1	Lactobacillus rossiae DSM 15814 (firmicutes)	strain=DSM 15814	1114972	SAMN02471396	PRJNA165045	Department of Biologia e Università di Bari-Dipartimenti Chimica Agro-Forestale ed Ambientale	2012-7-23	n/a	major	Scaffold	full	CLC Genomics Workbench v. 5.01	1000.0x	Illumina HiSeq		GCA_000277855.1	GCF_000277855.1	yes
NZ_ALNR01000143.1	211	100	100		ASM28791v1	Pseudomonas putida S12 (g-proteobacteria)	strain=S12	1215087	SAMN02470946	PRJNA171340	Shanghai Jiao Tong University	2012-8-15	n/a	major	Contig	full	Velvet v. 1.2.03	159.0x	Illumina GAII		GCA_000287915.1	GCF_000287915.1	yes
NZ_ALNR01000176.1	241	100	96.27		ASM28791v1	Pseudomonas putida S12 (g-proteobacteria)	strain=S12	1215087	SAMN02470946	PRJNA171340	Shanghai Jiao Tong University	2012-8-15	n/a	major	Contig	full	Velvet v. 1.2.03	159.0x	Illumina GAII		GCA_000287915.1	GCF_000287915.1	yes
NZ_AMQR01000122.1	332	98.47	98.49		C224contig	Vibrio vulnificus B2 (g-proteobacteria)	strain=B2	1229202	SAMN02471155	PRJNA174154	Zhejiang University	2012-10-5	n/a	major	Contig	full	IDBA-UD v. 1.0.9	100.0x	Illumina		GCA_000303175.1	GCF_000303175.1	yes
NZ_AMQR01000145.1	244	97.03	96.72		C224contig	Vibrio vulnificus B2 (g-proteobacteria)	strain=B2	1229202	SAMN02471155	PRJNA174154	Zhejiang University	2012-10-5	n/a	major	Contig	full	IDBA-UD v. 1.0.9	100.0x	Illumina		GCA_000303175.1	GCF_000303175.1	yes
NZ_AMQV01000123.1	344	99.68	91.28		ASM29963v1	Vibrio vulnificus NBRC 15645 = ATCC 27562 (g-proteobacteria)	strain=ATCC 27562	1219061	SAMN02469425	PRJNA172642	Zhejiang University	2012-9-27	n/a	major	Contig	full	SOAPdenovo v. 1.05	100.0x	Illumina HiSeq		GCA_000299635.1	GCF_000299635.1	yes
NZ_AMQV01000134.1	265	98.85	98.11		ASM29963v1	Vibrio vulnificus NBRC 15645 = ATCC 27562 (g-proteobacteria)	strain=ATCC 27562	1219061	SAMN02469425	PRJNA172642	Zhejiang University	2012-9-27	n/a	major	Contig	full	SOAPdenovo v. 1.05	100.0x	Illumina HiSeq		GCA_000299635.1	GCF_000299635.1	yes
NZ_AMSB01000159.1	325	98.01	92.62		ASM30043v1	Herbaspirillum rubrisubalbicans Os34 (b-proteobacteria)	strain=Os34	1235827	SAMN02469493	PRJNA175951	Zhejiang University	2012-10-1	n/a	major	Contig	full	CLC Genomic Workbench v. 5.5.1	600.0x	Illumina HiSeq		GCA_000300435.1	GCF_000300435.1	yes
NZ_AMYT01000013.1	610	98.52	99.84		CMarimammalium1.0	Catellicoccus marimammalium M35/04/3 (firmicutes)	strain=M35/04/3	1234409	SAMN02469835	PRJNA175483	Georgia Institute of Technology	2012-11-21	n/a	major	Contig	full	Velvet v. 1.0.13; Newbler v. 2.0.01.14	235.0x	Illumina HiSeq; 454	Representative Genome	GCA_000313915.1	GCF_000313915.1	yes
NZ_AMYT01000014.1	562	99.64	100		CMarimammalium1.0	Catellicoccus marimammalium M35/04/3 (firmicutes)	strain=M35/04/3	1234409	SAMN02469835	PRJNA175483	Georgia Institute of Technology	2012-11-21	n/a	major	Contig	full	Velvet v. 1.0.13; Newbler v. 2.0.01.14	235.0x	Illumina HiSeq; 454	Representative Genome	GCA_000313915.1	GCF_000313915.1	yes
NZ_ANHW01000065.1	436	99.77	100		Staph-aureus(H29).fna	Staphylococcus aureus subsp. aureus H29 (firmicutes)	strain=H29	1258575	SAMN02470764	PRJNA179361	Oklahoma State University	2013-6-5	n/a	major	Contig	full	Newbler v. 2.6	2.0x	454		GCA_000409145.1	GCF_000409145.1	yes
NZ_AUYP01000065.1	224	100	100		B. pumilus	Bacillus safensis (firmicutes)	strain=CCMA-560	561879	SAMN02471694	PRJNA209569	University of Campinas	2013-8-7	n/a	major	Contig	full	Velvet v. 1.1.07	1300.0x	Illumina HiSeq		GCA_000444805.1	GCF_000444805.1	yes
NZ_AVCR02000170.1	301	96.01	100		Psy1212_130925_2.0	Pseudomonas syringae pv. syringae 1212 (g-proteobacteria)	strain=1212	1357293	SAMN02471561	PRJNA211607	University of Arizona	2013-11-27	n/a	major	Contig	full	SPAdes v. 2.5.0	70.0x	Illumina HiSeq		GCA_000452465.2	GCF_000452465.1	yes
NZ_AVCR02000185.1	273	95.97	100		Psy1212_130925_2.0	Pseudomonas syringae pv. syringae 1212 (g-proteobacteria)	strain=1212	1357293	SAMN02471561	PRJNA211607	University of Arizona	2013-11-27	n/a	major	Contig	full	SPAdes v. 2.5.0	70.0x	Illumina HiSeq		GCA_000452465.2	GCF_000452465.1	yes
NZ_AVCR02000192.1	259	96.53	100		Psy1212_130925_2.0	Pseudomonas syringae pv. syringae 1212 (g-proteobacteria)	strain=1212	1357293	SAMN02471561	PRJNA211607	University of Arizona	2013-11-27	n/a	major	Contig	full	SPAdes v. 2.5.0	70.0x	Illumina HiSeq		GCA_000452465.2	GCF_000452465.1	yes
NZ_AVCR02000224.1	227	96.04	100		Psy1212_130925_2.0	Pseudomonas syringae pv. syringae 1212 (g-proteobacteria)	strain=1212	1357293	SAMN02471561	PRJNA211607	University of Arizona	2013-11-27	n/a	major	Contig	full	SPAdes v. 2.5.0	70.0x	Illumina HiSeq		GCA_000452465.2	GCF_000452465.1	yes
NZ_AVCR02000226.1	225	95.07	98.67		Psy1212_130925_2.0	Pseudomonas syringae pv. syringae 1212 (g-proteobacteria)	strain=1212	1357293	SAMN02471561	PRJNA211607	University of Arizona	2013-11-27	n/a	major	Contig	full	SPAdes v. 2.5.0	70.0x	Illumina HiSeq		GCA_000452465.2	GCF_000452465.1	yes
NZ_AVCR02000229.1	223	95.09	100		Psy1212_130925_2.0	Pseudomonas syringae pv. syringae 1212 (g-proteobacteria)	strain=1212	1357293	SAMN02471561	PRJNA211607	University of Arizona	2013-11-27	n/a	major	Contig	full	SPAdes v. 2.5.0	70.0x	Illumina HiSeq		GCA_000452465.2	GCF_000452465.1	yes
NZ_AVCR02000240.1	218	97.25	100		Psy1212_130925_2.0	Pseudomonas syringae pv. syringae 1212 (g-proteobacteria)	strain=1212	1357293	SAMN02471561	PRJNA211607	University of Arizona	2013-11-27	n/a	major	Contig	full	SPAdes v. 2.5.0	70.0x	Illumina HiSeq		GCA_000452465.2	GCF_000452465.1	yes
NZ_AWTB01000098.1	751	100	99.6		Gordonia amicalis CCMA-559	Gordonia amicalis CCMA-559 (high GC Gram+)	strain=CCMA-559	1386969	SAMN02471693	PRJNA215264	University of Campinas	2013-9-27	n/a	major	Contig	full	Velvet v. 1.2.07	1000x	Illumina		GCA_000472025.1	GCF_000472025.1	yes
NZ_AWXP01000046.1	313	98.67	96.17		version 3 of Proteus hauseri genome	Proteus hauseri ZMd44 (enterobacteria)	strain=ZMd44	1312367	SAMN02472132	PRJNA195421	Xiamen University	2013-11-20	n/a	major	Contig	full	De Bruijn graph v. Apr-2011	98.0x	Illumina		GCA_000497855.1	GCF_000497855.1	yes
NZ_AYKU01000055.1	1283	97.43	96.26		Ef.MTmid8.1	Enterococcus faecalis MTmid8 (firmicutes)	strain=MTmid8	1400806	SAMN02729329	PRJNA219192	Georgia Institute of Technology	2014-4-24	n/a	major	Contig	full	Velvet v. 1.2.03; GS De Novo Assembler v. 2.0.01.14	100.0x	Illumina HiSeq		GCA_000648135.1	GCF_000648135.1	yes
NZ_BACU01000744.1	250	99.6	100		ASM33327v1	Azospirillum sp. B4 (a-proteobacteria)	strain=B4	95605	SAMD00036565	PRJDA69951	Kazusa DNA Research Institute	2013-1-8	n/a	major	Scaffold	full	Paracel GenomeAssembler v. 2.6.2	3x	ABI 3730; Shimadzu DeNOVA-5500HT		GCA_000333275.1	GCF_000333275.1	yes
NZ_BACX01000312.1	104	100	100		ASM33333v1	Sphingomonas-like bacterium B12 (a-proteobacteria)	strain=B12	95606	SAMD00036568	PRJDA69957	Kazusa DNA Research Institute	2013-1-8	n/a	major	Contig	full	Paracel GenomeAssembler v. 2.6.2	3x	ABI 3730; Shimadzu DeNOVA-5500HT		GCA_000333335.1	GCF_000333335.1	yes
NZ_BACZ01000227.1	176	100	100		ASM33337v1	Curtobacterium sp. B18 (high GC Gram+)	strain=B18	95614	SAMD00036570	PRJDA69961	Kazusa DNA Research Institute	2013-1-8	n/a	major	Scaffold	full	Paracel GenomeAssembler v. 2.6.2	3x	ABI 3730; Shimadzu DeNOVA-5500HT		GCA_000333375.1	GCF_000333375.1	yes
NZ_BACZ01000242.1	80	100	100		ASM33337v1	Curtobacterium sp. B18 (high GC Gram+)	strain=B18	95614	SAMD00036570	PRJDA69961	Kazusa DNA Research Institute	2013-1-8	n/a	major	Scaffold	full	Paracel GenomeAssembler v. 2.6.2	3x	ABI 3730; Shimadzu DeNOVA-5500HT		GCA_000333375.1	GCF_000333375.1	yes
NZ_BADD01000209.1	169	100	100		ASM33345v1	Rhodopseudomonas sp. B29 (a-proteobacteria)	strain=B29	95607	SAMD00036574	PRJDA69969	Kazusa DNA Research Institute	2013-1-10	n/a	major	Scaffold	full	Paracel GenomeAssembler v. 2.6.2	3x	ABI 3730; Shimadzu DeNOVA-5500HT		GCA_000333455.1	GCF_000333455.1	yes
NZ_BAYQ01000073.1	461	99.78	100		ASM69501v1	Legionella pneumophila serogroup 1 (g-proteobacteria)	strain=TUM 13948	66976	SAMD00000401	PRJDB1750	Department of Microbiology and Infectious disease, School of Medicine, Toho University	2014-5-10	n/a	major	Contig	full	SPAdes v. 3.0.0	50x	Illumina Misec		GCA_000695015.1	GCF_000695015.1	yes
NZ_BBQT01000073.1	474	99.58	100		ASM157062v1	Syntrophomonas wolfei subsp. methylbutyratica (firmicutes)	strain=JCM14075	378794	SAMD00023186	PRJDB3315	National Institute of Advanced Industrial Science and Technology (AIST)	2016-1-7	n/a	major	Contig	full	SPAdes Genome Assembler v. 3.1.1	762x	Illumina MiSeq		GCA_001570625.1	GCF_001570625.1	yes
NZ_BBUN01001207.1	352	99.43	100		ASM97470v1	Mycobacterium celatum (high GC Gram+)	strain=ATCC 51131	28045	SAMD00025827	PRJDB3515	Kyorin University School of Medicine	2015-2-27	n/a	major	Contig	full	CLC Genomics Workbench v. 7.0	50x	ION Trent PGM	Representative Genome	GCA_000974705.1	GCF_000974705.1	yes
NZ_BBUQ01000166.1	150	100	100		ASM95389v1	Enterobacter cloacae (enterobacteria)	strain=MRY13-0312	550	SAMD00026326	PRJDB3530	National Institute of Infectious Diseases	2015-3-3	n/a	major	Contig	full	CLC Genomic Workbench v. 7.5.1	183.7x	Illumina HiSeq 2500		GCA_000953895.1	GCF_000953895.1	yes
NZ_BCMN01000096.1	460	100	100		ASM148514v1	Streptomyces turgidiscabies (high GC Gram+)	strain=T45	85558	SAMD00034891	PRJDB4008	Plant Pathology and Entomology, Kagoshima Institute for Agricultural Development	2015-12-23	n/a	major	Scaffold	full	SPAdes v. 3.5.0	249x	MiSeq		GCA_001485145.1	GCF_001485145.1	yes
NZ_BCMN01000097.1	438	99.77	100		ASM148514v1	Streptomyces turgidiscabies (high GC Gram+)	strain=T45	85558	SAMD00034891	PRJDB4008	Plant Pathology and Entomology, Kagoshima Institute for Agricultural Development	2015-12-23	n/a	major	Scaffold	full	SPAdes v. 3.5.0	249x	MiSeq		GCA_001485145.1	GCF_001485145.1	yes
NZ_BCOK01000084.1	417	100	100		ASM156976v1	Salmonella enterica (enterobacteria)	strain=NGUA12	28901	SAMD00043348	PRJDB4308	South Dakota State University	2016-1-22	n/a	major	Contig	full	SPAdes v. 3.5.0	Unknown	Illumina MiSeq kit v3		GCA_001569765.1	GCF_001569765.1	yes
NZ_BCOO01000023.1	382	100	100		ASM156984v1	Salmonella enterica (enterobacteria)	strain=NGUA16	28901	SAMD00043352	PRJDB4308	South Dakota State University	2016-1-22	n/a	major	Contig	full	SPAdes v. 3.5.0	Unknown	Illumina MiSeq kit v3		GCA_001569845.1	GCF_001569845.1	yes
NZ_BCOT01000003.1	428	99.77	100		ASM156994v1	Salmonella enterica (enterobacteria)	strain=NGUA21	28901	SAMD00043358	PRJDB4308	South Dakota State University	2016-1-22	n/a	major	Contig	full	SPAdes v. 3.5.0	Unknown	Illumina MiSeq kit v3		GCA_001569945.1	GCF_001569945.1	yes
NZ_BCOX01000153.1	458	99.78	99.56		ASM157002v1	Salmonella enterica (enterobacteria)	strain=NGUA25	28901	SAMD00043362	PRJDB4308	South Dakota State University	2016-1-22	n/a	major	Contig	full	SPAdes v. 3.5.0	Unknown	Illumina MiSeq kit v3		GCA_001570025.1	GCF_001570025.1	yes
NZ_BCPA01000049.1	410	100	100		ASM157008v1	Salmonella enterica (enterobacteria)	strain=NGUA28	28901	SAMD00043365	PRJDB4308	South Dakota State University	2016-1-22	n/a	major	Contig	full	SPAdes v. 3.5.0	Unknown	Illumina MiSeq kit v3		GCA_001570085.1	GCF_001570085.1	yes
NZ_BCPA01000146.1	395	99.49	100		ASM157008v1	Salmonella enterica (enterobacteria)	strain=NGUA28	28901	SAMD00043365	PRJDB4308	South Dakota State University	2016-1-22	n/a	major	Contig	full	SPAdes v. 3.5.0	Unknown	Illumina MiSeq kit v3		GCA_001570085.1	GCF_001570085.1	yes
NZ_BCPD01000042.1	425	99.53	100		ASM157014v1	Salmonella enterica (enterobacteria)	strain=NGUA31	28901	SAMD00043369	PRJDB4308	South Dakota State University	2016-1-22	n/a	major	Contig	full	SPAdes v. 3.5.0	Unknown	Illumina MiSeq kit v3		GCA_001570145.1	GCF_001570145.1	yes
NZ_BCPK01000067.1	478	100	100		ASM157028v1	Salmonella enterica (enterobacteria)	strain=NGUA38	28901	SAMD00043376	PRJDB4308	South Dakota State University	2016-1-22	n/a	major	Contig	full	SPAdes v. 3.5.0	Unknown	Illumina MiSeq kit v3		GCA_001570285.1	GCF_001570285.1	yes
NZ_BCPM01000123.1	419	100	100		ASM157032v1	Salmonella enterica (enterobacteria)	strain=NGUA40	28901	SAMD00043379	PRJDB4308	South Dakota State University	2016-1-22	n/a	major	Contig	full	SPAdes v. 3.5.0	Unknown	Illumina MiSeq kit v3		GCA_001570325.1	GCF_001570325.1	yes
NZ_BCPM01000131.1	459	99.78	100		ASM157032v1	Salmonella enterica (enterobacteria)	strain=NGUA40	28901	SAMD00043379	PRJDB4308	South Dakota State University	2016-1-22	n/a	major	Contig	full	SPAdes v. 3.5.0	Unknown	Illumina MiSeq kit v3		GCA_001570325.1	GCF_001570325.1	yes
NZ_BCPM01000143.1	416	99.76	100		ASM157032v1	Salmonella enterica (enterobacteria)	strain=NGUA40	28901	SAMD00043379	PRJDB4308	South Dakota State University	2016-1-22	n/a	major	Contig	full	SPAdes v. 3.5.0	Unknown	Illumina MiSeq kit v3		GCA_001570325.1	GCF_001570325.1	yes
NZ_BDNP01000528.1	275	100	99.27		ASM208951v1	Mycobacterium avium subsp. hominissuis (high GC Gram+)	strain=IH-788	439334	SAMD00076667	PRJDB502	Meijo University faculty of pharmacy	2017-3-31	n/a	major	Contig	full	CLC Genomics Workbench v. 9.0	236x	Illumina HiSeq 2500 V3 (100x2)		GCA_002089515.1	GCF_002089515.1	yes
NZ_BDQM01000230.1	277	100	100		ASM220786v1	Colwellia marinimaniae (g-proteobacteria)	strain=MTCD1	1513592	SAMD00081185	PRJDB5767	National Institute of Technology, Wakayama College	2017-6-12	n/a	major	Contig	full	SPAdes v. 3.9.1	143x	MiSeq; Illumina	Representative Genome	GCA_002207865.1	GCF_002207865.1	yes
NZ_BDQM01000325.1	262	100	100		ASM220786v1	Colwellia marinimaniae (g-proteobacteria)	strain=MTCD1	1513592	SAMD00081185	PRJDB5767	National Institute of Technology, Wakayama College	2017-6-12	n/a	major	Contig	full	SPAdes v. 3.9.1	143x	MiSeq; Illumina	Representative Genome	GCA_002207865.1	GCF_002207865.1	yes
NZ_BDQM01000344.1	259	100	100		ASM220786v1	Colwellia marinimaniae (g-proteobacteria)	strain=MTCD1	1513592	SAMD00081185	PRJDB5767	National Institute of Technology, Wakayama College	2017-6-12	n/a	major	Contig	full	SPAdes v. 3.9.1	143x	MiSeq; Illumina	Representative Genome	GCA_002207865.1	GCF_002207865.1	yes
NZ_BDQM01000443.1	245	100	100		ASM220786v1	Colwellia marinimaniae (g-proteobacteria)	strain=MTCD1	1513592	SAMD00081185	PRJDB5767	National Institute of Technology, Wakayama College	2017-6-12	n/a	major	Contig	full	SPAdes v. 3.9.1	143x	MiSeq; Illumina	Representative Genome	GCA_002207865.1	GCF_002207865.1	yes
NZ_BDQM01000451.1	244	99.59	100		ASM220786v1	Colwellia marinimaniae (g-proteobacteria)	strain=MTCD1	1513592	SAMD00081185	PRJDB5767	National Institute of Technology, Wakayama College	2017-6-12	n/a	major	Contig	full	SPAdes v. 3.9.1	143x	MiSeq; Illumina	Representative Genome	GCA_002207865.1	GCF_002207865.1	yes
NZ_BDQM01000456.1	244	98.31	97.13		ASM220786v1	Colwellia marinimaniae (g-proteobacteria)	strain=MTCD1	1513592	SAMD00081185	PRJDB5767	National Institute of Technology, Wakayama College	2017-6-12	n/a	major	Contig	full	SPAdes v. 3.9.1	143x	MiSeq; Illumina	Representative Genome	GCA_002207865.1	GCF_002207865.1	yes
NZ_BDQM01000461.1	244	100	100		ASM220786v1	Colwellia marinimaniae (g-proteobacteria)	strain=MTCD1	1513592	SAMD00081185	PRJDB5767	National Institute of Technology, Wakayama College	2017-6-12	n/a	major	Contig	full	SPAdes v. 3.9.1	143x	MiSeq; Illumina	Representative Genome	GCA_002207865.1	GCF_002207865.1	yes
NZ_BDQM01000564.1	230	100	100		ASM220786v1	Colwellia marinimaniae (g-proteobacteria)	strain=MTCD1	1513592	SAMD00081185	PRJDB5767	National Institute of Technology, Wakayama College	2017-6-12	n/a	major	Contig	full	SPAdes v. 3.9.1	143x	MiSeq; Illumina	Representative Genome	GCA_002207865.1	GCF_002207865.1	yes
NZ_BEAF01000065.1	276	100	100		ASM342144v1	Staphylococcus aureus (firmicutes)	strain=M6K034	1280	SAMD00083589	PRJDB5246	Medical Mycology Research Center	2018-8-20	n/a	major	Contig	full	SPAdes v. 3.11.1	499x	HiSeq2500		GCA_003421445.1	GCF_003421445.1	yes
NZ_BEAO01000107.1	374	99.2	100		ASM342162v1	Staphylococcus aureus (firmicutes)	strain=M6K051	1280	SAMD00083598	PRJDB5246	Medical Mycology Research Center	2018-8-20	n/a	major	Scaffold	full	SPAdes v. 3.11.1	300x	HiSeq2500		GCA_003421625.1	GCF_003421625.1	yes
NZ_BEAO01000160.1	223	98.65	100		ASM342162v1	Staphylococcus aureus (firmicutes)	strain=M6K051	1280	SAMD00083598	PRJDB5246	Medical Mycology Research Center	2018-8-20	n/a	major	Scaffold	full	SPAdes v. 3.11.1	300x	HiSeq2500		GCA_003421625.1	GCF_003421625.1	yes
NZ_BEFH01000115.1	563	99.82	100		ASM233412v1	Enterobacter hormaechei (enterobacteria)	strain=TUM10694	158836	SAMD00089487	PRJDB6127	Toho University	2017-8-28	n/a	major	Scaffold	full	CLC genomics workbench v. 9.5.4	88x	illumina MiSeq		GCA_002334125.1	GCF_002334125.1	yes
NZ_BFAC01000067.1	558	99.64	100		ASM293383v1	Microcystis aeruginosa NIES-87 (cyanobacteria)	strain=NIES-87	449440	SAMD00107617	PRJDB6597	National Institute for Environmental Studies	2018-1-25	n/a	major	Scaffold	full	SPAdes v. 3.7.1	95x	Illumina MiSeq		GCA_002933835.1	GCF_002933835.1	yes
NZ_BFAC01000069.1	556	98.92	100		ASM293383v1	Microcystis aeruginosa NIES-87 (cyanobacteria)	strain=NIES-87	449440	SAMD00107617	PRJDB6597	National Institute for Environmental Studies	2018-1-25	n/a	major	Scaffold	full	SPAdes v. 3.7.1	95x	Illumina MiSeq		GCA_002933835.1	GCF_002933835.1	yes
NZ_BFAC01000078.1	521	100	100		ASM293383v1	Microcystis aeruginosa NIES-87 (cyanobacteria)	strain=NIES-87	449440	SAMD00107617	PRJDB6597	National Institute for Environmental Studies	2018-1-25	n/a	major	Scaffold	full	SPAdes v. 3.7.1	95x	Illumina MiSeq		GCA_002933835.1	GCF_002933835.1	yes
NZ_BFAC01000079.1	512	100	100		ASM293383v1	Microcystis aeruginosa NIES-87 (cyanobacteria)	strain=NIES-87	449440	SAMD00107617	PRJDB6597	National Institute for Environmental Studies	2018-1-25	n/a	major	Scaffold	full	SPAdes v. 3.7.1	95x	Illumina MiSeq		GCA_002933835.1	GCF_002933835.1	yes
NZ_BFAC01000084.1	506	99.8	100		ASM293383v1	Microcystis aeruginosa NIES-87 (cyanobacteria)	strain=NIES-87	449440	SAMD00107617	PRJDB6597	National Institute for Environmental Studies	2018-1-25	n/a	major	Scaffold	full	SPAdes v. 3.7.1	95x	Illumina MiSeq		GCA_002933835.1	GCF_002933835.1	yes
NZ_BFAC01000100.1	472	100	100		ASM293383v1	Microcystis aeruginosa NIES-87 (cyanobacteria)	strain=NIES-87	449440	SAMD00107617	PRJDB6597	National Institute for Environmental Studies	2018-1-25	n/a	major	Scaffold	full	SPAdes v. 3.7.1	95x	Illumina MiSeq		GCA_002933835.1	GCF_002933835.1	yes
NZ_BFAC01000109.1	451	100	100		ASM293383v1	Microcystis aeruginosa NIES-87 (cyanobacteria)	strain=NIES-87	449440	SAMD00107617	PRJDB6597	National Institute for Environmental Studies	2018-1-25	n/a	major	Scaffold	full	SPAdes v. 3.7.1	95x	Illumina MiSeq		GCA_002933835.1	GCF_002933835.1	yes
NZ_BFCK01000344.1	319	99.06	100		ASM311489v1	Proteus mirabilis (enterobacteria)	strain=MH13-009N	584	SAMD00112926	PRJDB6655	National Institute of Infectious Diseases	2018-4-11	n/a	major	Contig	full	CLC Genomic Workbench v. 9.0	296.9x	Illumina MiniSeq		GCA_003114895.1	GCF_003114895.1	yes
NZ_BFCK01000485.1	382	99.74	100		ASM311489v1	Proteus mirabilis (enterobacteria)	strain=MH13-009N	584	SAMD00112926	PRJDB6655	National Institute of Infectious Diseases	2018-4-11	n/a	major	Contig	full	CLC Genomic Workbench v. 9.0	296.9x	Illumina MiniSeq		GCA_003114895.1	GCF_003114895.1	yes
NZ_BFCK01000538.1	472	99.58	100		ASM311489v1	Proteus mirabilis (enterobacteria)	strain=MH13-009N	584	SAMD00112926	PRJDB6655	National Institute of Infectious Diseases	2018-4-11	n/a	major	Contig	full	CLC Genomic Workbench v. 9.0	296.9x	Illumina MiniSeq		GCA_003114895.1	GCF_003114895.1	yes
NZ_BFCK01000559.1	335	99.7	100	WP_109024058.1	ASM311489v1	Proteus mirabilis (enterobacteria)	strain=MH13-009N	584	SAMD00112926	PRJDB6655	National Institute of Infectious Diseases	2018-4-11	n/a	major	Contig	full	CLC Genomic Workbench v. 9.0	296.9x	Illumina MiniSeq		GCA_003114895.1	GCF_003114895.1	yes
NZ_BFCK01000580.1	300	100	100		ASM311489v1	Proteus mirabilis (enterobacteria)	strain=MH13-009N	584	SAMD00112926	PRJDB6655	National Institute of Infectious Diseases	2018-4-11	n/a	major	Contig	full	CLC Genomic Workbench v. 9.0	296.9x	Illumina MiniSeq		GCA_003114895.1	GCF_003114895.1	yes
NZ_BFCK01000599.1	431	100	100	WP_109024065.1	ASM311489v1	Proteus mirabilis (enterobacteria)	strain=MH13-009N	584	SAMD00112926	PRJDB6655	National Institute of Infectious Diseases	2018-4-11	n/a	major	Contig	full	CLC Genomic Workbench v. 9.0	296.9x	Illumina MiniSeq		GCA_003114895.1	GCF_003114895.1	yes
NZ_BFCK01000621.1	313	100	100		ASM311489v1	Proteus mirabilis (enterobacteria)	strain=MH13-009N	584	SAMD00112926	PRJDB6655	National Institute of Infectious Diseases	2018-4-11	n/a	major	Contig	full	CLC Genomic Workbench v. 9.0	296.9x	Illumina MiniSeq		GCA_003114895.1	GCF_003114895.1	yes
NZ_BFCK01000626.1	312	99.68	100		ASM311489v1	Proteus mirabilis (enterobacteria)	strain=MH13-009N	584	SAMD00112926	PRJDB6655	National Institute of Infectious Diseases	2018-4-11	n/a	major	Contig	full	CLC Genomic Workbench v. 9.0	296.9x	Illumina MiniSeq		GCA_003114895.1	GCF_003114895.1	yes
NZ_BFCK01000633.1	349	100	100		ASM311489v1	Proteus mirabilis (enterobacteria)	strain=MH13-009N	584	SAMD00112926	PRJDB6655	National Institute of Infectious Diseases	2018-4-11	n/a	major	Contig	full	CLC Genomic Workbench v. 9.0	296.9x	Illumina MiniSeq		GCA_003114895.1	GCF_003114895.1	yes
NZ_BFCK01000653.1	302	99.67	99.34		ASM311489v1	Proteus mirabilis (enterobacteria)	strain=MH13-009N	584	SAMD00112926	PRJDB6655	National Institute of Infectious Diseases	2018-4-11	n/a	major	Contig	full	CLC Genomic Workbench v. 9.0	296.9x	Illumina MiniSeq		GCA_003114895.1	GCF_003114895.1	yes
NZ_BFCK01000685.1	313	99.68	100		ASM311489v1	Proteus mirabilis (enterobacteria)	strain=MH13-009N	584	SAMD00112926	PRJDB6655	National Institute of Infectious Diseases	2018-4-11	n/a	major	Contig	full	CLC Genomic Workbench v. 9.0	296.9x	Illumina MiniSeq		GCA_003114895.1	GCF_003114895.1	yes
NZ_BFCK01000690.1	419	99.76	100		ASM311489v1	Proteus mirabilis (enterobacteria)	strain=MH13-009N	584	SAMD00112926	PRJDB6655	National Institute of Infectious Diseases	2018-4-11	n/a	major	Contig	full	CLC Genomic Workbench v. 9.0	296.9x	Illumina MiniSeq		GCA_003114895.1	GCF_003114895.1	yes
NZ_BFCK01000691.1	389	100	100		ASM311489v1	Proteus mirabilis (enterobacteria)	strain=MH13-009N	584	SAMD00112926	PRJDB6655	National Institute of Infectious Diseases	2018-4-11	n/a	major	Contig	full	CLC Genomic Workbench v. 9.0	296.9x	Illumina MiniSeq		GCA_003114895.1	GCF_003114895.1	yes
NZ_BFCK01000705.1	323	100	100		ASM311489v1	Proteus mirabilis (enterobacteria)	strain=MH13-009N	584	SAMD00112926	PRJDB6655	National Institute of Infectious Diseases	2018-4-11	n/a	major	Contig	full	CLC Genomic Workbench v. 9.0	296.9x	Illumina MiniSeq		GCA_003114895.1	GCF_003114895.1	yes
NZ_BFCK01000707.1	399	99.5	100		ASM311489v1	Proteus mirabilis (enterobacteria)	strain=MH13-009N	584	SAMD00112926	PRJDB6655	National Institute of Infectious Diseases	2018-4-11	n/a	major	Contig	full	CLC Genomic Workbench v. 9.0	296.9x	Illumina MiniSeq		GCA_003114895.1	GCF_003114895.1	yes
NZ_BFCK01000708.1	331	99.7	100		ASM311489v1	Proteus mirabilis (enterobacteria)	strain=MH13-009N	584	SAMD00112926	PRJDB6655	National Institute of Infectious Diseases	2018-4-11	n/a	major	Contig	full	CLC Genomic Workbench v. 9.0	296.9x	Illumina MiniSeq		GCA_003114895.1	GCF_003114895.1	yes
NZ_BFCK01000709.1	307	99.67	100		ASM311489v1	Proteus mirabilis (enterobacteria)	strain=MH13-009N	584	SAMD00112926	PRJDB6655	National Institute of Infectious Diseases	2018-4-11	n/a	major	Contig	full	CLC Genomic Workbench v. 9.0	296.9x	Illumina MiniSeq		GCA_003114895.1	GCF_003114895.1	yes
NZ_BFCK01000712.1	360	99.72	100		ASM311489v1	Proteus mirabilis (enterobacteria)	strain=MH13-009N	584	SAMD00112926	PRJDB6655	National Institute of Infectious Diseases	2018-4-11	n/a	major	Contig	full	CLC Genomic Workbench v. 9.0	296.9x	Illumina MiniSeq		GCA_003114895.1	GCF_003114895.1	yes
NZ_BFCK01000713.1	326	100	100	WP_109024082.1	ASM311489v1	Proteus mirabilis (enterobacteria)	strain=MH13-009N	584	SAMD00112926	PRJDB6655	National Institute of Infectious Diseases	2018-4-11	n/a	major	Contig	full	CLC Genomic Workbench v. 9.0	296.9x	Illumina MiniSeq		GCA_003114895.1	GCF_003114895.1	yes
NZ_BFCK01000723.1	354	100	100		ASM311489v1	Proteus mirabilis (enterobacteria)	strain=MH13-009N	584	SAMD00112926	PRJDB6655	National Institute of Infectious Diseases	2018-4-11	n/a	major	Contig	full	CLC Genomic Workbench v. 9.0	296.9x	Illumina MiniSeq		GCA_003114895.1	GCF_003114895.1	yes
NZ_BFCK01000724.1	429	99.07	100		ASM311489v1	Proteus mirabilis (enterobacteria)	strain=MH13-009N	584	SAMD00112926	PRJDB6655	National Institute of Infectious Diseases	2018-4-11	n/a	major	Contig	full	CLC Genomic Workbench v. 9.0	296.9x	Illumina MiniSeq		GCA_003114895.1	GCF_003114895.1	yes
NZ_BFCK01000728.1	345	100	100		ASM311489v1	Proteus mirabilis (enterobacteria)	strain=MH13-009N	584	SAMD00112926	PRJDB6655	National Institute of Infectious Diseases	2018-4-11	n/a	major	Contig	full	CLC Genomic Workbench v. 9.0	296.9x	Illumina MiniSeq		GCA_003114895.1	GCF_003114895.1	yes
NZ_BFCK01000732.1	341	99.71	100		ASM311489v1	Proteus mirabilis (enterobacteria)	strain=MH13-009N	584	SAMD00112926	PRJDB6655	National Institute of Infectious Diseases	2018-4-11	n/a	major	Contig	full	CLC Genomic Workbench v. 9.0	296.9x	Illumina MiniSeq		GCA_003114895.1	GCF_003114895.1	yes
NZ_BFCK01000739.1	329	99.7	100		ASM311489v1	Proteus mirabilis (enterobacteria)	strain=MH13-009N	584	SAMD00112926	PRJDB6655	National Institute of Infectious Diseases	2018-4-11	n/a	major	Contig	full	CLC Genomic Workbench v. 9.0	296.9x	Illumina MiniSeq		GCA_003114895.1	GCF_003114895.1	yes
NZ_BFCK01000741.1	308	99.68	100		ASM311489v1	Proteus mirabilis (enterobacteria)	strain=MH13-009N	584	SAMD00112926	PRJDB6655	National Institute of Infectious Diseases	2018-4-11	n/a	major	Contig	full	CLC Genomic Workbench v. 9.0	296.9x	Illumina MiniSeq		GCA_003114895.1	GCF_003114895.1	yes
NZ_BFCK01000744.1	307	99.68	100		ASM311489v1	Proteus mirabilis (enterobacteria)	strain=MH13-009N	584	SAMD00112926	PRJDB6655	National Institute of Infectious Diseases	2018-4-11	n/a	major	Contig	full	CLC Genomic Workbench v. 9.0	296.9x	Illumina MiniSeq		GCA_003114895.1	GCF_003114895.1	yes
NZ_BFCK01000752.1	354	99.72	100		ASM311489v1	Proteus mirabilis (enterobacteria)	strain=MH13-009N	584	SAMD00112926	PRJDB6655	National Institute of Infectious Diseases	2018-4-11	n/a	major	Contig	full	CLC Genomic Workbench v. 9.0	296.9x	Illumina MiniSeq		GCA_003114895.1	GCF_003114895.1	yes
NZ_BFCK01000756.1	317	100	100		ASM311489v1	Proteus mirabilis (enterobacteria)	strain=MH13-009N	584	SAMD00112926	PRJDB6655	National Institute of Infectious Diseases	2018-4-11	n/a	major	Contig	full	CLC Genomic Workbench v. 9.0	296.9x	Illumina MiniSeq		GCA_003114895.1	GCF_003114895.1	yes
NZ_BFCK01000759.1	327	99.39	100		ASM311489v1	Proteus mirabilis (enterobacteria)	strain=MH13-009N	584	SAMD00112926	PRJDB6655	National Institute of Infectious Diseases	2018-4-11	n/a	major	Contig	full	CLC Genomic Workbench v. 9.0	296.9x	Illumina MiniSeq		GCA_003114895.1	GCF_003114895.1	yes
NZ_BFCK01000766.1	322	99.69	100		ASM311489v1	Proteus mirabilis (enterobacteria)	strain=MH13-009N	584	SAMD00112926	PRJDB6655	National Institute of Infectious Diseases	2018-4-11	n/a	major	Contig	full	CLC Genomic Workbench v. 9.0	296.9x	Illumina MiniSeq		GCA_003114895.1	GCF_003114895.1	yes
NZ_BFCK01000770.1	462	100	100		ASM311489v1	Proteus mirabilis (enterobacteria)	strain=MH13-009N	584	SAMD00112926	PRJDB6655	National Institute of Infectious Diseases	2018-4-11	n/a	major	Contig	full	CLC Genomic Workbench v. 9.0	296.9x	Illumina MiniSeq		GCA_003114895.1	GCF_003114895.1	yes
NZ_BFCK01000771.1	381	100	100		ASM311489v1	Proteus mirabilis (enterobacteria)	strain=MH13-009N	584	SAMD00112926	PRJDB6655	National Institute of Infectious Diseases	2018-4-11	n/a	major	Contig	full	CLC Genomic Workbench v. 9.0	296.9x	Illumina MiniSeq		GCA_003114895.1	GCF_003114895.1	yes
NZ_BFCK01000775.1	337	100	100		ASM311489v1	Proteus mirabilis (enterobacteria)	strain=MH13-009N	584	SAMD00112926	PRJDB6655	National Institute of Infectious Diseases	2018-4-11	n/a	major	Contig	full	CLC Genomic Workbench v. 9.0	296.9x	Illumina MiniSeq		GCA_003114895.1	GCF_003114895.1	yes
NZ_BFCK01000776.1	385	99.74	100		ASM311489v1	Proteus mirabilis (enterobacteria)	strain=MH13-009N	584	SAMD00112926	PRJDB6655	National Institute of Infectious Diseases	2018-4-11	n/a	major	Contig	full	CLC Genomic Workbench v. 9.0	296.9x	Illumina MiniSeq		GCA_003114895.1	GCF_003114895.1	yes
NZ_BFCK01000777.1	311	99.68	100		ASM311489v1	Proteus mirabilis (enterobacteria)	strain=MH13-009N	584	SAMD00112926	PRJDB6655	National Institute of Infectious Diseases	2018-4-11	n/a	major	Contig	full	CLC Genomic Workbench v. 9.0	296.9x	Illumina MiniSeq		GCA_003114895.1	GCF_003114895.1	yes
NZ_BFCK01000779.1	348	100	100		ASM311489v1	Proteus mirabilis (enterobacteria)	strain=MH13-009N	584	SAMD00112926	PRJDB6655	National Institute of Infectious Diseases	2018-4-11	n/a	major	Contig	full	CLC Genomic Workbench v. 9.0	296.9x	Illumina MiniSeq		GCA_003114895.1	GCF_003114895.1	yes
NZ_BFCK01000782.1	300	100	100		ASM311489v1	Proteus mirabilis (enterobacteria)	strain=MH13-009N	584	SAMD00112926	PRJDB6655	National Institute of Infectious Diseases	2018-4-11	n/a	major	Contig	full	CLC Genomic Workbench v. 9.0	296.9x	Illumina MiniSeq		GCA_003114895.1	GCF_003114895.1	yes
NZ_BFCK01000783.1	302	99.67	100		ASM311489v1	Proteus mirabilis (enterobacteria)	strain=MH13-009N	584	SAMD00112926	PRJDB6655	National Institute of Infectious Diseases	2018-4-11	n/a	major	Contig	full	CLC Genomic Workbench v. 9.0	296.9x	Illumina MiniSeq		GCA_003114895.1	GCF_003114895.1	yes
NZ_BFCK01000787.1	389	99.74	100		ASM311489v1	Proteus mirabilis (enterobacteria)	strain=MH13-009N	584	SAMD00112926	PRJDB6655	National Institute of Infectious Diseases	2018-4-11	n/a	major	Contig	full	CLC Genomic Workbench v. 9.0	296.9x	Illumina MiniSeq		GCA_003114895.1	GCF_003114895.1	yes
NZ_BFCK01000793.1	326	100	100		ASM311489v1	Proteus mirabilis (enterobacteria)	strain=MH13-009N	584	SAMD00112926	PRJDB6655	National Institute of Infectious Diseases	2018-4-11	n/a	major	Contig	full	CLC Genomic Workbench v. 9.0	296.9x	Illumina MiniSeq		GCA_003114895.1	GCF_003114895.1	yes
NZ_BFCK01000797.1	413	99.76	100		ASM311489v1	Proteus mirabilis (enterobacteria)	strain=MH13-009N	584	SAMD00112926	PRJDB6655	National Institute of Infectious Diseases	2018-4-11	n/a	major	Contig	full	CLC Genomic Workbench v. 9.0	296.9x	Illumina MiniSeq		GCA_003114895.1	GCF_003114895.1	yes
NZ_BFCK01000801.1	337	99.7	100		ASM311489v1	Proteus mirabilis (enterobacteria)	strain=MH13-009N	584	SAMD00112926	PRJDB6655	National Institute of Infectious Diseases	2018-4-11	n/a	major	Contig	full	CLC Genomic Workbench v. 9.0	296.9x	Illumina MiniSeq		GCA_003114895.1	GCF_003114895.1	yes
NZ_BFCK01000802.1	331	99.7	100		ASM311489v1	Proteus mirabilis (enterobacteria)	strain=MH13-009N	584	SAMD00112926	PRJDB6655	National Institute of Infectious Diseases	2018-4-11	n/a	major	Contig	full	CLC Genomic Workbench v. 9.0	296.9x	Illumina MiniSeq		GCA_003114895.1	GCF_003114895.1	yes
NZ_BFCK01000803.1	341	100	100		ASM311489v1	Proteus mirabilis (enterobacteria)	strain=MH13-009N	584	SAMD00112926	PRJDB6655	National Institute of Infectious Diseases	2018-4-11	n/a	major	Contig	full	CLC Genomic Workbench v. 9.0	296.9x	Illumina MiniSeq		GCA_003114895.1	GCF_003114895.1	yes
NZ_BFCK01000808.1	382	100	100	WP_109024091.1	ASM311489v1	Proteus mirabilis (enterobacteria)	strain=MH13-009N	584	SAMD00112926	PRJDB6655	National Institute of Infectious Diseases	2018-4-11	n/a	major	Contig	full	CLC Genomic Workbench v. 9.0	296.9x	Illumina MiniSeq		GCA_003114895.1	GCF_003114895.1	yes
NZ_BFCK01000811.1	345	100	100		ASM311489v1	Proteus mirabilis (enterobacteria)	strain=MH13-009N	584	SAMD00112926	PRJDB6655	National Institute of Infectious Diseases	2018-4-11	n/a	major	Contig	full	CLC Genomic Workbench v. 9.0	296.9x	Illumina MiniSeq		GCA_003114895.1	GCF_003114895.1	yes
NZ_BFCK01000812.1	309	99.68	100		ASM311489v1	Proteus mirabilis (enterobacteria)	strain=MH13-009N	584	SAMD00112926	PRJDB6655	National Institute of Infectious Diseases	2018-4-11	n/a	major	Contig	full	CLC Genomic Workbench v. 9.0	296.9x	Illumina MiniSeq		GCA_003114895.1	GCF_003114895.1	yes
NZ_BFCK01000814.1	321	99.38	100		ASM311489v1	Proteus mirabilis (enterobacteria)	strain=MH13-009N	584	SAMD00112926	PRJDB6655	National Institute of Infectious Diseases	2018-4-11	n/a	major	Contig	full	CLC Genomic Workbench v. 9.0	296.9x	Illumina MiniSeq		GCA_003114895.1	GCF_003114895.1	yes
NZ_BFCK01000815.1	330	99.7	100		ASM311489v1	Proteus mirabilis (enterobacteria)	strain=MH13-009N	584	SAMD00112926	PRJDB6655	National Institute of Infectious Diseases	2018-4-11	n/a	major	Contig	full	CLC Genomic Workbench v. 9.0	296.9x	Illumina MiniSeq		GCA_003114895.1	GCF_003114895.1	yes
NZ_BFCK01000817.1	375	99.2	100		ASM311489v1	Proteus mirabilis (enterobacteria)	strain=MH13-009N	584	SAMD00112926	PRJDB6655	National Institute of Infectious Diseases	2018-4-11	n/a	major	Contig	full	CLC Genomic Workbench v. 9.0	296.9x	Illumina MiniSeq		GCA_003114895.1	GCF_003114895.1	yes
NZ_BFCK01000818.1	318	99.69	100		ASM311489v1	Proteus mirabilis (enterobacteria)	strain=MH13-009N	584	SAMD00112926	PRJDB6655	National Institute of Infectious Diseases	2018-4-11	n/a	major	Contig	full	CLC Genomic Workbench v. 9.0	296.9x	Illumina MiniSeq		GCA_003114895.1	GCF_003114895.1	yes
NZ_BFCK01000824.1	333	100	100		ASM311489v1	Proteus mirabilis (enterobacteria)	strain=MH13-009N	584	SAMD00112926	PRJDB6655	National Institute of Infectious Diseases	2018-4-11	n/a	major	Contig	full	CLC Genomic Workbench v. 9.0	296.9x	Illumina MiniSeq		GCA_003114895.1	GCF_003114895.1	yes
NZ_BFCK01000828.1	328	100	100		ASM311489v1	Proteus mirabilis (enterobacteria)	strain=MH13-009N	584	SAMD00112926	PRJDB6655	National Institute of Infectious Diseases	2018-4-11	n/a	major	Contig	full	CLC Genomic Workbench v. 9.0	296.9x	Illumina MiniSeq		GCA_003114895.1	GCF_003114895.1	yes
NZ_BFCK01000829.1	312	99.68	100		ASM311489v1	Proteus mirabilis (enterobacteria)	strain=MH13-009N	584	SAMD00112926	PRJDB6655	National Institute of Infectious Diseases	2018-4-11	n/a	major	Contig	full	CLC Genomic Workbench v. 9.0	296.9x	Illumina MiniSeq		GCA_003114895.1	GCF_003114895.1	yes
NZ_BFCK01000830.1	310	100	100		ASM311489v1	Proteus mirabilis (enterobacteria)	strain=MH13-009N	584	SAMD00112926	PRJDB6655	National Institute of Infectious Diseases	2018-4-11	n/a	major	Contig	full	CLC Genomic Workbench v. 9.0	296.9x	Illumina MiniSeq		GCA_003114895.1	GCF_003114895.1	yes
NZ_BFCK01000831.1	406	99.75	100		ASM311489v1	Proteus mirabilis (enterobacteria)	strain=MH13-009N	584	SAMD00112926	PRJDB6655	National Institute of Infectious Diseases	2018-4-11	n/a	major	Contig	full	CLC Genomic Workbench v. 9.0	296.9x	Illumina MiniSeq		GCA_003114895.1	GCF_003114895.1	yes
NZ_BFCK01000834.1	503	98.61	100		ASM311489v1	Proteus mirabilis (enterobacteria)	strain=MH13-009N	584	SAMD00112926	PRJDB6655	National Institute of Infectious Diseases	2018-4-11	n/a	major	Contig	full	CLC Genomic Workbench v. 9.0	296.9x	Illumina MiniSeq		GCA_003114895.1	GCF_003114895.1	yes
NZ_BFCK01000837.1	361	99.45	100		ASM311489v1	Proteus mirabilis (enterobacteria)	strain=MH13-009N	584	SAMD00112926	PRJDB6655	National Institute of Infectious Diseases	2018-4-11	n/a	major	Contig	full	CLC Genomic Workbench v. 9.0	296.9x	Illumina MiniSeq		GCA_003114895.1	GCF_003114895.1	yes
NZ_BFCK01000838.1	426	95.78	100		ASM311489v1	Proteus mirabilis (enterobacteria)	strain=MH13-009N	584	SAMD00112926	PRJDB6655	National Institute of Infectious Diseases	2018-4-11	n/a	major	Contig	full	CLC Genomic Workbench v. 9.0	296.9x	Illumina MiniSeq		GCA_003114895.1	GCF_003114895.1	yes
NZ_BFCK01000839.1	358	99.72	100		ASM311489v1	Proteus mirabilis (enterobacteria)	strain=MH13-009N	584	SAMD00112926	PRJDB6655	National Institute of Infectious Diseases	2018-4-11	n/a	major	Contig	full	CLC Genomic Workbench v. 9.0	296.9x	Illumina MiniSeq		GCA_003114895.1	GCF_003114895.1	yes
NZ_BFCK01000841.1	318	99.37	100		ASM311489v1	Proteus mirabilis (enterobacteria)	strain=MH13-009N	584	SAMD00112926	PRJDB6655	National Institute of Infectious Diseases	2018-4-11	n/a	major	Contig	full	CLC Genomic Workbench v. 9.0	296.9x	Illumina MiniSeq		GCA_003114895.1	GCF_003114895.1	yes
NZ_BFCK01000846.1	525	99.81	100		ASM311489v1	Proteus mirabilis (enterobacteria)	strain=MH13-009N	584	SAMD00112926	PRJDB6655	National Institute of Infectious Diseases	2018-4-11	n/a	major	Contig	full	CLC Genomic Workbench v. 9.0	296.9x	Illumina MiniSeq		GCA_003114895.1	GCF_003114895.1	yes
NZ_BFCK01000847.1	350	99.71	100		ASM311489v1	Proteus mirabilis (enterobacteria)	strain=MH13-009N	584	SAMD00112926	PRJDB6655	National Institute of Infectious Diseases	2018-4-11	n/a	major	Contig	full	CLC Genomic Workbench v. 9.0	296.9x	Illumina MiniSeq		GCA_003114895.1	GCF_003114895.1	yes
NZ_BFCK01000848.1	344	99.42	100		ASM311489v1	Proteus mirabilis (enterobacteria)	strain=MH13-009N	584	SAMD00112926	PRJDB6655	National Institute of Infectious Diseases	2018-4-11	n/a	major	Contig	full	CLC Genomic Workbench v. 9.0	296.9x	Illumina MiniSeq		GCA_003114895.1	GCF_003114895.1	yes
NZ_BFCK01000853.1	320	99.69	100		ASM311489v1	Proteus mirabilis (enterobacteria)	strain=MH13-009N	584	SAMD00112926	PRJDB6655	National Institute of Infectious Diseases	2018-4-11	n/a	major	Contig	full	CLC Genomic Workbench v. 9.0	296.9x	Illumina MiniSeq		GCA_003114895.1	GCF_003114895.1	yes
NZ_BFCK01000855.1	397	100	100		ASM311489v1	Proteus mirabilis (enterobacteria)	strain=MH13-009N	584	SAMD00112926	PRJDB6655	National Institute of Infectious Diseases	2018-4-11	n/a	major	Contig	full	CLC Genomic Workbench v. 9.0	296.9x	Illumina MiniSeq		GCA_003114895.1	GCF_003114895.1	yes
NZ_BFCK01000859.1	338	99.7	100		ASM311489v1	Proteus mirabilis (enterobacteria)	strain=MH13-009N	584	SAMD00112926	PRJDB6655	National Institute of Infectious Diseases	2018-4-11	n/a	major	Contig	full	CLC Genomic Workbench v. 9.0	296.9x	Illumina MiniSeq		GCA_003114895.1	GCF_003114895.1	yes
NZ_BFCK01000860.1	328	99.7	100		ASM311489v1	Proteus mirabilis (enterobacteria)	strain=MH13-009N	584	SAMD00112926	PRJDB6655	National Institute of Infectious Diseases	2018-4-11	n/a	major	Contig	full	CLC Genomic Workbench v. 9.0	296.9x	Illumina MiniSeq		GCA_003114895.1	GCF_003114895.1	yes
NZ_BFCK01000861.1	329	100	100		ASM311489v1	Proteus mirabilis (enterobacteria)	strain=MH13-009N	584	SAMD00112926	PRJDB6655	National Institute of Infectious Diseases	2018-4-11	n/a	major	Contig	full	CLC Genomic Workbench v. 9.0	296.9x	Illumina MiniSeq		GCA_003114895.1	GCF_003114895.1	yes
NZ_BFCK01000864.1	308	100	100		ASM311489v1	Proteus mirabilis (enterobacteria)	strain=MH13-009N	584	SAMD00112926	PRJDB6655	National Institute of Infectious Diseases	2018-4-11	n/a	major	Contig	full	CLC Genomic Workbench v. 9.0	296.9x	Illumina MiniSeq		GCA_003114895.1	GCF_003114895.1	yes
NZ_BFCL01000134.1	601	99.83	100	WP_108961784.1	ASM311491v1	Citrobacter freundii (enterobacteria)	strain=MH17-012N	546	SAMD00112927	PRJDB6655	National Institute of Infectious Diseases	2018-4-11	n/a	major	Contig	full	CLC Genomic Workbench v. 9.0	235.1x	Illumina HiSeq 4000		GCA_003114915.1	GCF_003114915.1	yes
NZ_BFCN01000177.1	545	100	100	WP_108997664.1	ASM311495v1	Escherichia coli (E. coli)	strain=MH17-008M	562	SAMD00112929	PRJDB6655	National Institute of Infectious Diseases	2018-4-11	n/a	major	Contig	full	CLC Genomic Workbench v. 9.0	129.6x	Illumina HiSeq 4000		GCA_003114955.1	GCF_003114955.1	yes
NZ_BFCN01000201.1	599	99.83	100	WP_108961784.1	ASM311495v1	Escherichia coli (E. coli)	strain=MH17-008M	562	SAMD00112929	PRJDB6655	National Institute of Infectious Diseases	2018-4-11	n/a	major	Contig	full	CLC Genomic Workbench v. 9.0	129.6x	Illumina HiSeq 4000		GCA_003114955.1	GCF_003114955.1	yes
NZ_BFCN01000204.1	657	99.7	100		ASM311495v1	Escherichia coli (E. coli)	strain=MH17-008M	562	SAMD00112929	PRJDB6655	National Institute of Infectious Diseases	2018-4-11	n/a	major	Contig	full	CLC Genomic Workbench v. 9.0	129.6x	Illumina HiSeq 4000		GCA_003114955.1	GCF_003114955.1	yes
NZ_BFCN01000280.1	572	98.25	100		ASM311495v1	Escherichia coli (E. coli)	strain=MH17-008M	562	SAMD00112929	PRJDB6655	National Institute of Infectious Diseases	2018-4-11	n/a	major	Contig	full	CLC Genomic Workbench v. 9.0	129.6x	Illumina HiSeq 4000		GCA_003114955.1	GCF_003114955.1	yes
NZ_BFCN01000321.1	328	96.64	99.7		ASM311495v1	Escherichia coli (E. coli)	strain=MH17-008M	562	SAMD00112929	PRJDB6655	National Institute of Infectious Diseases	2018-4-11	n/a	major	Contig	full	CLC Genomic Workbench v. 9.0	129.6x	Illumina HiSeq 4000		GCA_003114955.1	GCF_003114955.1	yes
NZ_BFCN01000377.1	472	99.79	100		ASM311495v1	Escherichia coli (E. coli)	strain=MH17-008M	562	SAMD00112929	PRJDB6655	National Institute of Infectious Diseases	2018-4-11	n/a	major	Contig	full	CLC Genomic Workbench v. 9.0	129.6x	Illumina HiSeq 4000		GCA_003114955.1	GCF_003114955.1	yes
NZ_BFCN01000409.1	413	96.37	99.52		ASM311495v1	Escherichia coli (E. coli)	strain=MH17-008M	562	SAMD00112929	PRJDB6655	National Institute of Infectious Diseases	2018-4-11	n/a	major	Contig	full	CLC Genomic Workbench v. 9.0	129.6x	Illumina HiSeq 4000		GCA_003114955.1	GCF_003114955.1	yes
NZ_BFCO01000218.1	416	100	100		ASM311497v1	Escherichia coli (E. coli)	strain=MH13-051M	562	SAMD00112930	PRJDB6655	National Institute of Infectious Diseases	2018-4-11	n/a	major	Contig	full	CLC Genomic Workbench v. 9.0	107.9x	Illumina MiniSeq		GCA_003114975.1	GCF_003114975.1	yes
NZ_BFCO01000219.1	326	99.39	100		ASM311497v1	Escherichia coli (E. coli)	strain=MH13-051M	562	SAMD00112930	PRJDB6655	National Institute of Infectious Diseases	2018-4-11	n/a	major	Contig	full	CLC Genomic Workbench v. 9.0	107.9x	Illumina MiniSeq		GCA_003114975.1	GCF_003114975.1	yes
NZ_BFCO01000229.1	344	99.13	100		ASM311497v1	Escherichia coli (E. coli)	strain=MH13-051M	562	SAMD00112930	PRJDB6655	National Institute of Infectious Diseases	2018-4-11	n/a	major	Contig	full	CLC Genomic Workbench v. 9.0	107.9x	Illumina MiniSeq		GCA_003114975.1	GCF_003114975.1	yes
NZ_BFCQ01000156.1	474	99.37	100		ASM311501v1	Klebsiella pneumoniae (enterobacteria)	strain=MH15-289M	573	SAMD00112932	PRJDB6655	National Institute of Infectious Diseases	2018-4-11	n/a	major	Contig	full	CLC Genomic Workbench v. 9.0	158.8x	Illumina HiSeq 4000		GCA_003115015.1	GCF_003115015.1	yes
NZ_BFCS01000167.1	337	100	100		ASM311505v1	Klebsiella pneumoniae (enterobacteria)	strain=MH15-258M	573	SAMD00112934	PRJDB6655	National Institute of Infectious Diseases	2018-4-11	n/a	major	Contig	full	CLC Genomic Workbench v. 9.0	444.1x	Illumina MiniSeq		GCA_003115055.1	GCF_003115055.1	yes
NZ_BFCS01000171.1	302	100	100		ASM311505v1	Klebsiella pneumoniae (enterobacteria)	strain=MH15-258M	573	SAMD00112934	PRJDB6655	National Institute of Infectious Diseases	2018-4-11	n/a	major	Contig	full	CLC Genomic Workbench v. 9.0	444.1x	Illumina MiniSeq		GCA_003115055.1	GCF_003115055.1	yes
NZ_BFCS01000173.1	360	99.72	100		ASM311505v1	Klebsiella pneumoniae (enterobacteria)	strain=MH15-258M	573	SAMD00112934	PRJDB6655	National Institute of Infectious Diseases	2018-4-11	n/a	major	Contig	full	CLC Genomic Workbench v. 9.0	444.1x	Illumina MiniSeq		GCA_003115055.1	GCF_003115055.1	yes
NZ_BFCS01000186.1	393	99.24	100		ASM311505v1	Klebsiella pneumoniae (enterobacteria)	strain=MH15-258M	573	SAMD00112934	PRJDB6655	National Institute of Infectious Diseases	2018-4-11	n/a	major	Contig	full	CLC Genomic Workbench v. 9.0	444.1x	Illumina MiniSeq		GCA_003115055.1	GCF_003115055.1	yes
NZ_BFCS01000190.1	442	99.32	100		ASM311505v1	Klebsiella pneumoniae (enterobacteria)	strain=MH15-258M	573	SAMD00112934	PRJDB6655	National Institute of Infectious Diseases	2018-4-11	n/a	major	Contig	full	CLC Genomic Workbench v. 9.0	444.1x	Illumina MiniSeq		GCA_003115055.1	GCF_003115055.1	yes
NZ_BFCS01000204.1	346	99.42	100		ASM311505v1	Klebsiella pneumoniae (enterobacteria)	strain=MH15-258M	573	SAMD00112934	PRJDB6655	National Institute of Infectious Diseases	2018-4-11	n/a	major	Contig	full	CLC Genomic Workbench v. 9.0	444.1x	Illumina MiniSeq		GCA_003115055.1	GCF_003115055.1	yes
NZ_BFCS01000242.1	317	100	100		ASM311505v1	Klebsiella pneumoniae (enterobacteria)	strain=MH15-258M	573	SAMD00112934	PRJDB6655	National Institute of Infectious Diseases	2018-4-11	n/a	major	Contig	full	CLC Genomic Workbench v. 9.0	444.1x	Illumina MiniSeq		GCA_003115055.1	GCF_003115055.1	yes
NZ_BFCS01000258.1	370	100	100		ASM311505v1	Klebsiella pneumoniae (enterobacteria)	strain=MH15-258M	573	SAMD00112934	PRJDB6655	National Institute of Infectious Diseases	2018-4-11	n/a	major	Contig	full	CLC Genomic Workbench v. 9.0	444.1x	Illumina MiniSeq		GCA_003115055.1	GCF_003115055.1	yes
NZ_BFCS01000269.1	366	99.45	100		ASM311505v1	Klebsiella pneumoniae (enterobacteria)	strain=MH15-258M	573	SAMD00112934	PRJDB6655	National Institute of Infectious Diseases	2018-4-11	n/a	major	Contig	full	CLC Genomic Workbench v. 9.0	444.1x	Illumina MiniSeq		GCA_003115055.1	GCF_003115055.1	yes
NZ_BFCS01000281.1	377	100	100		ASM311505v1	Klebsiella pneumoniae (enterobacteria)	strain=MH15-258M	573	SAMD00112934	PRJDB6655	National Institute of Infectious Diseases	2018-4-11	n/a	major	Contig	full	CLC Genomic Workbench v. 9.0	444.1x	Illumina MiniSeq		GCA_003115055.1	GCF_003115055.1	yes
NZ_BFCS01000290.1	302	99.67	99.34		ASM311505v1	Klebsiella pneumoniae (enterobacteria)	strain=MH15-258M	573	SAMD00112934	PRJDB6655	National Institute of Infectious Diseases	2018-4-11	n/a	major	Contig	full	CLC Genomic Workbench v. 9.0	444.1x	Illumina MiniSeq		GCA_003115055.1	GCF_003115055.1	yes
NZ_BFCS01000297.1	470	99.79	100	WP_109017716.1	ASM311505v1	Klebsiella pneumoniae (enterobacteria)	strain=MH15-258M	573	SAMD00112934	PRJDB6655	National Institute of Infectious Diseases	2018-4-11	n/a	major	Contig	full	CLC Genomic Workbench v. 9.0	444.1x	Illumina MiniSeq		GCA_003115055.1	GCF_003115055.1	yes
NZ_BFCS01000299.1	345	100	100		ASM311505v1	Klebsiella pneumoniae (enterobacteria)	strain=MH15-258M	573	SAMD00112934	PRJDB6655	National Institute of Infectious Diseases	2018-4-11	n/a	major	Contig	full	CLC Genomic Workbench v. 9.0	444.1x	Illumina MiniSeq		GCA_003115055.1	GCF_003115055.1	yes
NZ_BFCS01000306.1	402	99.75	100		ASM311505v1	Klebsiella pneumoniae (enterobacteria)	strain=MH15-258M	573	SAMD00112934	PRJDB6655	National Institute of Infectious Diseases	2018-4-11	n/a	major	Contig	full	CLC Genomic Workbench v. 9.0	444.1x	Illumina MiniSeq		GCA_003115055.1	GCF_003115055.1	yes
NZ_BFCS01000307.1	362	99.45	100		ASM311505v1	Klebsiella pneumoniae (enterobacteria)	strain=MH15-258M	573	SAMD00112934	PRJDB6655	National Institute of Infectious Diseases	2018-4-11	n/a	major	Contig	full	CLC Genomic Workbench v. 9.0	444.1x	Illumina MiniSeq		GCA_003115055.1	GCF_003115055.1	yes
NZ_BFCS01000317.1	379	99.74	100		ASM311505v1	Klebsiella pneumoniae (enterobacteria)	strain=MH15-258M	573	SAMD00112934	PRJDB6655	National Institute of Infectious Diseases	2018-4-11	n/a	major	Contig	full	CLC Genomic Workbench v. 9.0	444.1x	Illumina MiniSeq		GCA_003115055.1	GCF_003115055.1	yes
NZ_BFCS01000320.1	429	100	100		ASM311505v1	Klebsiella pneumoniae (enterobacteria)	strain=MH15-258M	573	SAMD00112934	PRJDB6655	National Institute of Infectious Diseases	2018-4-11	n/a	major	Contig	full	CLC Genomic Workbench v. 9.0	444.1x	Illumina MiniSeq		GCA_003115055.1	GCF_003115055.1	yes
NZ_BFCS01000327.1	316	100	100		ASM311505v1	Klebsiella pneumoniae (enterobacteria)	strain=MH15-258M	573	SAMD00112934	PRJDB6655	National Institute of Infectious Diseases	2018-4-11	n/a	major	Contig	full	CLC Genomic Workbench v. 9.0	444.1x	Illumina MiniSeq		GCA_003115055.1	GCF_003115055.1	yes
NZ_BFCS01000337.1	301	99.67	100		ASM311505v1	Klebsiella pneumoniae (enterobacteria)	strain=MH15-258M	573	SAMD00112934	PRJDB6655	National Institute of Infectious Diseases	2018-4-11	n/a	major	Contig	full	CLC Genomic Workbench v. 9.0	444.1x	Illumina MiniSeq		GCA_003115055.1	GCF_003115055.1	yes
NZ_BFCS01000349.1	397	99.75	100		ASM311505v1	Klebsiella pneumoniae (enterobacteria)	strain=MH15-258M	573	SAMD00112934	PRJDB6655	National Institute of Infectious Diseases	2018-4-11	n/a	major	Contig	full	CLC Genomic Workbench v. 9.0	444.1x	Illumina MiniSeq		GCA_003115055.1	GCF_003115055.1	yes
NZ_BFCS01000354.1	325	99.69	100		ASM311505v1	Klebsiella pneumoniae (enterobacteria)	strain=MH15-258M	573	SAMD00112934	PRJDB6655	National Institute of Infectious Diseases	2018-4-11	n/a	major	Contig	full	CLC Genomic Workbench v. 9.0	444.1x	Illumina MiniSeq		GCA_003115055.1	GCF_003115055.1	yes
NZ_BFCS01000364.1	357	99.16	100		ASM311505v1	Klebsiella pneumoniae (enterobacteria)	strain=MH15-258M	573	SAMD00112934	PRJDB6655	National Institute of Infectious Diseases	2018-4-11	n/a	major	Contig	full	CLC Genomic Workbench v. 9.0	444.1x	Illumina MiniSeq		GCA_003115055.1	GCF_003115055.1	yes
NZ_BFCS01000365.1	379	99.74	100		ASM311505v1	Klebsiella pneumoniae (enterobacteria)	strain=MH15-258M	573	SAMD00112934	PRJDB6655	National Institute of Infectious Diseases	2018-4-11	n/a	major	Contig	full	CLC Genomic Workbench v. 9.0	444.1x	Illumina MiniSeq		GCA_003115055.1	GCF_003115055.1	yes
NZ_BFCS01000367.1	326	99.69	100		ASM311505v1	Klebsiella pneumoniae (enterobacteria)	strain=MH15-258M	573	SAMD00112934	PRJDB6655	National Institute of Infectious Diseases	2018-4-11	n/a	major	Contig	full	CLC Genomic Workbench v. 9.0	444.1x	Illumina MiniSeq		GCA_003115055.1	GCF_003115055.1	yes
NZ_BFCS01000368.1	307	99.35	100		ASM311505v1	Klebsiella pneumoniae (enterobacteria)	strain=MH15-258M	573	SAMD00112934	PRJDB6655	National Institute of Infectious Diseases	2018-4-11	n/a	major	Contig	full	CLC Genomic Workbench v. 9.0	444.1x	Illumina MiniSeq		GCA_003115055.1	GCF_003115055.1	yes
NZ_BFCS01000369.1	350	99.71	100		ASM311505v1	Klebsiella pneumoniae (enterobacteria)	strain=MH15-258M	573	SAMD00112934	PRJDB6655	National Institute of Infectious Diseases	2018-4-11	n/a	major	Contig	full	CLC Genomic Workbench v. 9.0	444.1x	Illumina MiniSeq		GCA_003115055.1	GCF_003115055.1	yes
NZ_BFCS01000370.1	348	99.71	100		ASM311505v1	Klebsiella pneumoniae (enterobacteria)	strain=MH15-258M	573	SAMD00112934	PRJDB6655	National Institute of Infectious Diseases	2018-4-11	n/a	major	Contig	full	CLC Genomic Workbench v. 9.0	444.1x	Illumina MiniSeq		GCA_003115055.1	GCF_003115055.1	yes
NZ_BFCS01000372.1	359	100	100		ASM311505v1	Klebsiella pneumoniae (enterobacteria)	strain=MH15-258M	573	SAMD00112934	PRJDB6655	National Institute of Infectious Diseases	2018-4-11	n/a	major	Contig	full	CLC Genomic Workbench v. 9.0	444.1x	Illumina MiniSeq		GCA_003115055.1	GCF_003115055.1	yes
NZ_BFCS01000374.1	328	99.7	100		ASM311505v1	Klebsiella pneumoniae (enterobacteria)	strain=MH15-258M	573	SAMD00112934	PRJDB6655	National Institute of Infectious Diseases	2018-4-11	n/a	major	Contig	full	CLC Genomic Workbench v. 9.0	444.1x	Illumina MiniSeq		GCA_003115055.1	GCF_003115055.1	yes
NZ_BFCT01000169.1	150	100	100		ASM311507v1	Klebsiella pneumoniae (enterobacteria)	strain=MH15-208H	573	SAMD00112935	PRJDB6655	National Institute of Infectious Diseases	2018-4-11	n/a	major	Contig	full	CLC Genomic Workbench v. 9.0	216.5x	Illumina HiSeq 4000		GCA_003115075.1	GCF_003115075.1	yes
NZ_BFCT01000170.1	150	100	100		ASM311507v1	Klebsiella pneumoniae (enterobacteria)	strain=MH15-208H	573	SAMD00112935	PRJDB6655	National Institute of Infectious Diseases	2018-4-11	n/a	major	Contig	full	CLC Genomic Workbench v. 9.0	216.5x	Illumina HiSeq 4000		GCA_003115075.1	GCF_003115075.1	yes
NZ_BFCT01000184.1	150	100	100		ASM311507v1	Klebsiella pneumoniae (enterobacteria)	strain=MH15-208H	573	SAMD00112935	PRJDB6655	National Institute of Infectious Diseases	2018-4-11	n/a	major	Contig	full	CLC Genomic Workbench v. 9.0	216.5x	Illumina HiSeq 4000		GCA_003115075.1	GCF_003115075.1	yes
NZ_BFCT01000194.1	150	100	100		ASM311507v1	Klebsiella pneumoniae (enterobacteria)	strain=MH15-208H	573	SAMD00112935	PRJDB6655	National Institute of Infectious Diseases	2018-4-11	n/a	major	Contig	full	CLC Genomic Workbench v. 9.0	216.5x	Illumina HiSeq 4000		GCA_003115075.1	GCF_003115075.1	yes
NZ_BFCT01000196.1	150	100	100		ASM311507v1	Klebsiella pneumoniae (enterobacteria)	strain=MH15-208H	573	SAMD00112935	PRJDB6655	National Institute of Infectious Diseases	2018-4-11	n/a	major	Contig	full	CLC Genomic Workbench v. 9.0	216.5x	Illumina HiSeq 4000		GCA_003115075.1	GCF_003115075.1	yes
NZ_BFCT01000197.1	150	100	100		ASM311507v1	Klebsiella pneumoniae (enterobacteria)	strain=MH15-208H	573	SAMD00112935	PRJDB6655	National Institute of Infectious Diseases	2018-4-11	n/a	major	Contig	full	CLC Genomic Workbench v. 9.0	216.5x	Illumina HiSeq 4000		GCA_003115075.1	GCF_003115075.1	yes
NZ_BFCT01000201.1	147	100	100		ASM311507v1	Klebsiella pneumoniae (enterobacteria)	strain=MH15-208H	573	SAMD00112935	PRJDB6655	National Institute of Infectious Diseases	2018-4-11	n/a	major	Contig	full	CLC Genomic Workbench v. 9.0	216.5x	Illumina HiSeq 4000		GCA_003115075.1	GCF_003115075.1	yes
NZ_BFCT01000202.1	150	100	100		ASM311507v1	Klebsiella pneumoniae (enterobacteria)	strain=MH15-208H	573	SAMD00112935	PRJDB6655	National Institute of Infectious Diseases	2018-4-11	n/a	major	Contig	full	CLC Genomic Workbench v. 9.0	216.5x	Illumina HiSeq 4000		GCA_003115075.1	GCF_003115075.1	yes
NZ_BFCU01000106.1	311	100	100		ASM311509v1	Klebsiella pneumoniae (enterobacteria)	strain=MH13-191M	573	SAMD00112936	PRJDB6655	National Institute of Infectious Diseases	2018-4-11	n/a	major	Contig	full	CLC Genomic Workbench v. 9.0	350.8x	Illumina MiniSeq		GCA_003115095.1	GCF_003115095.1	yes
NZ_BFCU01000126.1	344	100	100		ASM311509v1	Klebsiella pneumoniae (enterobacteria)	strain=MH13-191M	573	SAMD00112936	PRJDB6655	National Institute of Infectious Diseases	2018-4-11	n/a	major	Contig	full	CLC Genomic Workbench v. 9.0	350.8x	Illumina MiniSeq		GCA_003115095.1	GCF_003115095.1	yes
NZ_BFCU01000158.1	373	100	100	WP_109039108.1	ASM311509v1	Klebsiella pneumoniae (enterobacteria)	strain=MH13-191M	573	SAMD00112936	PRJDB6655	National Institute of Infectious Diseases	2018-4-11	n/a	major	Contig	full	CLC Genomic Workbench v. 9.0	350.8x	Illumina MiniSeq		GCA_003115095.1	GCF_003115095.1	yes
NZ_BFCU01000159.1	457	100	100		ASM311509v1	Klebsiella pneumoniae (enterobacteria)	strain=MH13-191M	573	SAMD00112936	PRJDB6655	National Institute of Infectious Diseases	2018-4-11	n/a	major	Contig	full	CLC Genomic Workbench v. 9.0	350.8x	Illumina MiniSeq		GCA_003115095.1	GCF_003115095.1	yes
NZ_BFCU01000184.1	396	99.24	100	WP_109039113.1	ASM311509v1	Klebsiella pneumoniae (enterobacteria)	strain=MH13-191M	573	SAMD00112936	PRJDB6655	National Institute of Infectious Diseases	2018-4-11	n/a	major	Contig	full	CLC Genomic Workbench v. 9.0	350.8x	Illumina MiniSeq		GCA_003115095.1	GCF_003115095.1	yes
NZ_BFCU01000192.1	423	99.76	100		ASM311509v1	Klebsiella pneumoniae (enterobacteria)	strain=MH13-191M	573	SAMD00112936	PRJDB6655	National Institute of Infectious Diseases	2018-4-11	n/a	major	Contig	full	CLC Genomic Workbench v. 9.0	350.8x	Illumina MiniSeq		GCA_003115095.1	GCF_003115095.1	yes
NZ_BFCU01000195.1	375	100	100		ASM311509v1	Klebsiella pneumoniae (enterobacteria)	strain=MH13-191M	573	SAMD00112936	PRJDB6655	National Institute of Infectious Diseases	2018-4-11	n/a	major	Contig	full	CLC Genomic Workbench v. 9.0	350.8x	Illumina MiniSeq		GCA_003115095.1	GCF_003115095.1	yes
NZ_BFCU01000198.1	395	99.75	99.49		ASM311509v1	Klebsiella pneumoniae (enterobacteria)	strain=MH13-191M	573	SAMD00112936	PRJDB6655	National Institute of Infectious Diseases	2018-4-11	n/a	major	Contig	full	CLC Genomic Workbench v. 9.0	350.8x	Illumina MiniSeq		GCA_003115095.1	GCF_003115095.1	yes
NZ_BFCU01000205.1	320	100	100		ASM311509v1	Klebsiella pneumoniae (enterobacteria)	strain=MH13-191M	573	SAMD00112936	PRJDB6655	National Institute of Infectious Diseases	2018-4-11	n/a	major	Contig	full	CLC Genomic Workbench v. 9.0	350.8x	Illumina MiniSeq		GCA_003115095.1	GCF_003115095.1	yes
NZ_BFCU01000210.1	328	99.09	100		ASM311509v1	Klebsiella pneumoniae (enterobacteria)	strain=MH13-191M	573	SAMD00112936	PRJDB6655	National Institute of Infectious Diseases	2018-4-11	n/a	major	Contig	full	CLC Genomic Workbench v. 9.0	350.8x	Illumina MiniSeq		GCA_003115095.1	GCF_003115095.1	yes
NZ_BFCU01000212.1	306	99.67	100		ASM311509v1	Klebsiella pneumoniae (enterobacteria)	strain=MH13-191M	573	SAMD00112936	PRJDB6655	National Institute of Infectious Diseases	2018-4-11	n/a	major	Contig	full	CLC Genomic Workbench v. 9.0	350.8x	Illumina MiniSeq		GCA_003115095.1	GCF_003115095.1	yes
NZ_BFCU01000214.1	401	99.75	100		ASM311509v1	Klebsiella pneumoniae (enterobacteria)	strain=MH13-191M	573	SAMD00112936	PRJDB6655	National Institute of Infectious Diseases	2018-4-11	n/a	major	Contig	full	CLC Genomic Workbench v. 9.0	350.8x	Illumina MiniSeq		GCA_003115095.1	GCF_003115095.1	yes
NZ_BFCU01000224.1	437	100	100		ASM311509v1	Klebsiella pneumoniae (enterobacteria)	strain=MH13-191M	573	SAMD00112936	PRJDB6655	National Institute of Infectious Diseases	2018-4-11	n/a	major	Contig	full	CLC Genomic Workbench v. 9.0	350.8x	Illumina MiniSeq		GCA_003115095.1	GCF_003115095.1	yes
NZ_BFCU01000228.1	307	99.67	100		ASM311509v1	Klebsiella pneumoniae (enterobacteria)	strain=MH13-191M	573	SAMD00112936	PRJDB6655	National Institute of Infectious Diseases	2018-4-11	n/a	major	Contig	full	CLC Genomic Workbench v. 9.0	350.8x	Illumina MiniSeq		GCA_003115095.1	GCF_003115095.1	yes
NZ_BFCU01000229.1	305	100	100		ASM311509v1	Klebsiella pneumoniae (enterobacteria)	strain=MH13-191M	573	SAMD00112936	PRJDB6655	National Institute of Infectious Diseases	2018-4-11	n/a	major	Contig	full	CLC Genomic Workbench v. 9.0	350.8x	Illumina MiniSeq		GCA_003115095.1	GCF_003115095.1	yes
NZ_BFCU01000235.1	346	100	100		ASM311509v1	Klebsiella pneumoniae (enterobacteria)	strain=MH13-191M	573	SAMD00112936	PRJDB6655	National Institute of Infectious Diseases	2018-4-11	n/a	major	Contig	full	CLC Genomic Workbench v. 9.0	350.8x	Illumina MiniSeq		GCA_003115095.1	GCF_003115095.1	yes
NZ_BFCU01000245.1	317	100	100	WP_109039122.1	ASM311509v1	Klebsiella pneumoniae (enterobacteria)	strain=MH13-191M	573	SAMD00112936	PRJDB6655	National Institute of Infectious Diseases	2018-4-11	n/a	major	Contig	full	CLC Genomic Workbench v. 9.0	350.8x	Illumina MiniSeq		GCA_003115095.1	GCF_003115095.1	yes
NZ_BFCU01000254.1	312	100	100		ASM311509v1	Klebsiella pneumoniae (enterobacteria)	strain=MH13-191M	573	SAMD00112936	PRJDB6655	National Institute of Infectious Diseases	2018-4-11	n/a	major	Contig	full	CLC Genomic Workbench v. 9.0	350.8x	Illumina MiniSeq		GCA_003115095.1	GCF_003115095.1	yes
NZ_BFCU01000258.1	318	100	100		ASM311509v1	Klebsiella pneumoniae (enterobacteria)	strain=MH13-191M	573	SAMD00112936	PRJDB6655	National Institute of Infectious Diseases	2018-4-11	n/a	major	Contig	full	CLC Genomic Workbench v. 9.0	350.8x	Illumina MiniSeq		GCA_003115095.1	GCF_003115095.1	yes
NZ_BFCU01000261.1	388	100	100		ASM311509v1	Klebsiella pneumoniae (enterobacteria)	strain=MH13-191M	573	SAMD00112936	PRJDB6655	National Institute of Infectious Diseases	2018-4-11	n/a	major	Contig	full	CLC Genomic Workbench v. 9.0	350.8x	Illumina MiniSeq		GCA_003115095.1	GCF_003115095.1	yes
NZ_BFCU01000263.1	461	100	100	WP_109039124.1	ASM311509v1	Klebsiella pneumoniae (enterobacteria)	strain=MH13-191M	573	SAMD00112936	PRJDB6655	National Institute of Infectious Diseases	2018-4-11	n/a	major	Contig	full	CLC Genomic Workbench v. 9.0	350.8x	Illumina MiniSeq		GCA_003115095.1	GCF_003115095.1	yes
NZ_BFCU01000265.1	302	100	99.01		ASM311509v1	Klebsiella pneumoniae (enterobacteria)	strain=MH13-191M	573	SAMD00112936	PRJDB6655	National Institute of Infectious Diseases	2018-4-11	n/a	major	Contig	full	CLC Genomic Workbench v. 9.0	350.8x	Illumina MiniSeq		GCA_003115095.1	GCF_003115095.1	yes
NZ_BFCU01000268.1	329	100	100		ASM311509v1	Klebsiella pneumoniae (enterobacteria)	strain=MH13-191M	573	SAMD00112936	PRJDB6655	National Institute of Infectious Diseases	2018-4-11	n/a	major	Contig	full	CLC Genomic Workbench v. 9.0	350.8x	Illumina MiniSeq		GCA_003115095.1	GCF_003115095.1	yes
NZ_BFCU01000269.1	341	99.41	100		ASM311509v1	Klebsiella pneumoniae (enterobacteria)	strain=MH13-191M	573	SAMD00112936	PRJDB6655	National Institute of Infectious Diseases	2018-4-11	n/a	major	Contig	full	CLC Genomic Workbench v. 9.0	350.8x	Illumina MiniSeq		GCA_003115095.1	GCF_003115095.1	yes
NZ_BFCU01000276.1	434	99.77	100		ASM311509v1	Klebsiella pneumoniae (enterobacteria)	strain=MH13-191M	573	SAMD00112936	PRJDB6655	National Institute of Infectious Diseases	2018-4-11	n/a	major	Contig	full	CLC Genomic Workbench v. 9.0	350.8x	Illumina MiniSeq		GCA_003115095.1	GCF_003115095.1	yes
NZ_BFCU01000277.1	366	99.45	100		ASM311509v1	Klebsiella pneumoniae (enterobacteria)	strain=MH13-191M	573	SAMD00112936	PRJDB6655	National Institute of Infectious Diseases	2018-4-11	n/a	major	Contig	full	CLC Genomic Workbench v. 9.0	350.8x	Illumina MiniSeq		GCA_003115095.1	GCF_003115095.1	yes
NZ_BFCU01000278.1	370	99.73	100		ASM311509v1	Klebsiella pneumoniae (enterobacteria)	strain=MH13-191M	573	SAMD00112936	PRJDB6655	National Institute of Infectious Diseases	2018-4-11	n/a	major	Contig	full	CLC Genomic Workbench v. 9.0	350.8x	Illumina MiniSeq		GCA_003115095.1	GCF_003115095.1	yes
NZ_BFCU01000279.1	353	99.72	100		ASM311509v1	Klebsiella pneumoniae (enterobacteria)	strain=MH13-191M	573	SAMD00112936	PRJDB6655	National Institute of Infectious Diseases	2018-4-11	n/a	major	Contig	full	CLC Genomic Workbench v. 9.0	350.8x	Illumina MiniSeq		GCA_003115095.1	GCF_003115095.1	yes
NZ_BFCU01000281.1	401	99.75	100		ASM311509v1	Klebsiella pneumoniae (enterobacteria)	strain=MH13-191M	573	SAMD00112936	PRJDB6655	National Institute of Infectious Diseases	2018-4-11	n/a	major	Contig	full	CLC Genomic Workbench v. 9.0	350.8x	Illumina MiniSeq		GCA_003115095.1	GCF_003115095.1	yes
NZ_BFCU01000283.1	301	99.67	100		ASM311509v1	Klebsiella pneumoniae (enterobacteria)	strain=MH13-191M	573	SAMD00112936	PRJDB6655	National Institute of Infectious Diseases	2018-4-11	n/a	major	Contig	full	CLC Genomic Workbench v. 9.0	350.8x	Illumina MiniSeq		GCA_003115095.1	GCF_003115095.1	yes
NZ_BFCU01000284.1	450	99.33	100		ASM311509v1	Klebsiella pneumoniae (enterobacteria)	strain=MH13-191M	573	SAMD00112936	PRJDB6655	National Institute of Infectious Diseases	2018-4-11	n/a	major	Contig	full	CLC Genomic Workbench v. 9.0	350.8x	Illumina MiniSeq		GCA_003115095.1	GCF_003115095.1	yes
NZ_BFCU01000286.1	372	100	100		ASM311509v1	Klebsiella pneumoniae (enterobacteria)	strain=MH13-191M	573	SAMD00112936	PRJDB6655	National Institute of Infectious Diseases	2018-4-11	n/a	major	Contig	full	CLC Genomic Workbench v. 9.0	350.8x	Illumina MiniSeq		GCA_003115095.1	GCF_003115095.1	yes
NZ_BFCU01000287.1	313	99.68	99.36		ASM311509v1	Klebsiella pneumoniae (enterobacteria)	strain=MH13-191M	573	SAMD00112936	PRJDB6655	National Institute of Infectious Diseases	2018-4-11	n/a	major	Contig	full	CLC Genomic Workbench v. 9.0	350.8x	Illumina MiniSeq		GCA_003115095.1	GCF_003115095.1	yes
NZ_BFCU01000290.1	351	99.43	100		ASM311509v1	Klebsiella pneumoniae (enterobacteria)	strain=MH13-191M	573	SAMD00112936	PRJDB6655	National Institute of Infectious Diseases	2018-4-11	n/a	major	Contig	full	CLC Genomic Workbench v. 9.0	350.8x	Illumina MiniSeq		GCA_003115095.1	GCF_003115095.1	yes
NZ_BFCU01000291.1	398	100	100		ASM311509v1	Klebsiella pneumoniae (enterobacteria)	strain=MH13-191M	573	SAMD00112936	PRJDB6655	National Institute of Infectious Diseases	2018-4-11	n/a	major	Contig	full	CLC Genomic Workbench v. 9.0	350.8x	Illumina MiniSeq		GCA_003115095.1	GCF_003115095.1	yes
NZ_BFCU01000292.1	339	100	100		ASM311509v1	Klebsiella pneumoniae (enterobacteria)	strain=MH13-191M	573	SAMD00112936	PRJDB6655	National Institute of Infectious Diseases	2018-4-11	n/a	major	Contig	full	CLC Genomic Workbench v. 9.0	350.8x	Illumina MiniSeq		GCA_003115095.1	GCF_003115095.1	yes
NZ_BFCU01000293.1	334	100	100		ASM311509v1	Klebsiella pneumoniae (enterobacteria)	strain=MH13-191M	573	SAMD00112936	PRJDB6655	National Institute of Infectious Diseases	2018-4-11	n/a	major	Contig	full	CLC Genomic Workbench v. 9.0	350.8x	Illumina MiniSeq		GCA_003115095.1	GCF_003115095.1	yes
NZ_BFCU01000296.1	346	99.71	100		ASM311509v1	Klebsiella pneumoniae (enterobacteria)	strain=MH13-191M	573	SAMD00112936	PRJDB6655	National Institute of Infectious Diseases	2018-4-11	n/a	major	Contig	full	CLC Genomic Workbench v. 9.0	350.8x	Illumina MiniSeq		GCA_003115095.1	GCF_003115095.1	yes
NZ_BFCU01000300.1	387	100	100		ASM311509v1	Klebsiella pneumoniae (enterobacteria)	strain=MH13-191M	573	SAMD00112936	PRJDB6655	National Institute of Infectious Diseases	2018-4-11	n/a	major	Contig	full	CLC Genomic Workbench v. 9.0	350.8x	Illumina MiniSeq		GCA_003115095.1	GCF_003115095.1	yes
NZ_BFCU01000301.1	357	99.72	100		ASM311509v1	Klebsiella pneumoniae (enterobacteria)	strain=MH13-191M	573	SAMD00112936	PRJDB6655	National Institute of Infectious Diseases	2018-4-11	n/a	major	Contig	full	CLC Genomic Workbench v. 9.0	350.8x	Illumina MiniSeq		GCA_003115095.1	GCF_003115095.1	yes
NZ_BFCU01000307.1	353	100	100		ASM311509v1	Klebsiella pneumoniae (enterobacteria)	strain=MH13-191M	573	SAMD00112936	PRJDB6655	National Institute of Infectious Diseases	2018-4-11	n/a	major	Contig	full	CLC Genomic Workbench v. 9.0	350.8x	Illumina MiniSeq		GCA_003115095.1	GCF_003115095.1	yes
NZ_BFCU01000313.1	365	98.9	100		ASM311509v1	Klebsiella pneumoniae (enterobacteria)	strain=MH13-191M	573	SAMD00112936	PRJDB6655	National Institute of Infectious Diseases	2018-4-11	n/a	major	Contig	full	CLC Genomic Workbench v. 9.0	350.8x	Illumina MiniSeq		GCA_003115095.1	GCF_003115095.1	yes
NZ_BFCU01000314.1	388	100	100		ASM311509v1	Klebsiella pneumoniae (enterobacteria)	strain=MH13-191M	573	SAMD00112936	PRJDB6655	National Institute of Infectious Diseases	2018-4-11	n/a	major	Contig	full	CLC Genomic Workbench v. 9.0	350.8x	Illumina MiniSeq		GCA_003115095.1	GCF_003115095.1	yes
NZ_BFCU01000318.1	368	98.91	100		ASM311509v1	Klebsiella pneumoniae (enterobacteria)	strain=MH13-191M	573	SAMD00112936	PRJDB6655	National Institute of Infectious Diseases	2018-4-11	n/a	major	Contig	full	CLC Genomic Workbench v. 9.0	350.8x	Illumina MiniSeq		GCA_003115095.1	GCF_003115095.1	yes
NZ_BFCU01000319.1	383	99.22	100		ASM311509v1	Klebsiella pneumoniae (enterobacteria)	strain=MH13-191M	573	SAMD00112936	PRJDB6655	National Institute of Infectious Diseases	2018-4-11	n/a	major	Contig	full	CLC Genomic Workbench v. 9.0	350.8x	Illumina MiniSeq		GCA_003115095.1	GCF_003115095.1	yes
NZ_BFCU01000321.1	354	99.72	100		ASM311509v1	Klebsiella pneumoniae (enterobacteria)	strain=MH13-191M	573	SAMD00112936	PRJDB6655	National Institute of Infectious Diseases	2018-4-11	n/a	major	Contig	full	CLC Genomic Workbench v. 9.0	350.8x	Illumina MiniSeq		GCA_003115095.1	GCF_003115095.1	yes
NZ_BFCU01000336.1	399	99.25	100		ASM311509v1	Klebsiella pneumoniae (enterobacteria)	strain=MH13-191M	573	SAMD00112936	PRJDB6655	National Institute of Infectious Diseases	2018-4-11	n/a	major	Contig	full	CLC Genomic Workbench v. 9.0	350.8x	Illumina MiniSeq		GCA_003115095.1	GCF_003115095.1	yes
NZ_BFCU01000337.1	328	98.79	100		ASM311509v1	Klebsiella pneumoniae (enterobacteria)	strain=MH13-191M	573	SAMD00112936	PRJDB6655	National Institute of Infectious Diseases	2018-4-11	n/a	major	Contig	full	CLC Genomic Workbench v. 9.0	350.8x	Illumina MiniSeq		GCA_003115095.1	GCF_003115095.1	yes
NZ_BFCU01000338.1	358	95.81	100		ASM311509v1	Klebsiella pneumoniae (enterobacteria)	strain=MH13-191M	573	SAMD00112936	PRJDB6655	National Institute of Infectious Diseases	2018-4-11	n/a	major	Contig	full	CLC Genomic Workbench v. 9.0	350.8x	Illumina MiniSeq		GCA_003115095.1	GCF_003115095.1	yes
NZ_BFCU01000340.1	326	100	100		ASM311509v1	Klebsiella pneumoniae (enterobacteria)	strain=MH13-191M	573	SAMD00112936	PRJDB6655	National Institute of Infectious Diseases	2018-4-11	n/a	major	Contig	full	CLC Genomic Workbench v. 9.0	350.8x	Illumina MiniSeq		GCA_003115095.1	GCF_003115095.1	yes
NZ_BFCU01000341.1	413	98.55	100		ASM311509v1	Klebsiella pneumoniae (enterobacteria)	strain=MH13-191M	573	SAMD00112936	PRJDB6655	National Institute of Infectious Diseases	2018-4-11	n/a	major	Contig	full	CLC Genomic Workbench v. 9.0	350.8x	Illumina MiniSeq		GCA_003115095.1	GCF_003115095.1	yes
NZ_BFCU01000346.1	795	99.38	100	WP_109039130.1	ASM311509v1	Klebsiella pneumoniae (enterobacteria)	strain=MH13-191M	573	SAMD00112936	PRJDB6655	National Institute of Infectious Diseases	2018-4-11	n/a	major	Contig	full	CLC Genomic Workbench v. 9.0	350.8x	Illumina MiniSeq		GCA_003115095.1	GCF_003115095.1	yes
NZ_BFCU01000350.1	391	99.23	100		ASM311509v1	Klebsiella pneumoniae (enterobacteria)	strain=MH13-191M	573	SAMD00112936	PRJDB6655	National Institute of Infectious Diseases	2018-4-11	n/a	major	Contig	full	CLC Genomic Workbench v. 9.0	350.8x	Illumina MiniSeq		GCA_003115095.1	GCF_003115095.1	yes
NZ_BFCU01000352.1	485	98.77	100		ASM311509v1	Klebsiella pneumoniae (enterobacteria)	strain=MH13-191M	573	SAMD00112936	PRJDB6655	National Institute of Infectious Diseases	2018-4-11	n/a	major	Contig	full	CLC Genomic Workbench v. 9.0	350.8x	Illumina MiniSeq		GCA_003115095.1	GCF_003115095.1	yes
NZ_BFCU01000356.1	362	98.9	100		ASM311509v1	Klebsiella pneumoniae (enterobacteria)	strain=MH13-191M	573	SAMD00112936	PRJDB6655	National Institute of Infectious Diseases	2018-4-11	n/a	major	Contig	full	CLC Genomic Workbench v. 9.0	350.8x	Illumina MiniSeq		GCA_003115095.1	GCF_003115095.1	yes
NZ_BFCU01000358.1	408	99.26	100		ASM311509v1	Klebsiella pneumoniae (enterobacteria)	strain=MH13-191M	573	SAMD00112936	PRJDB6655	National Institute of Infectious Diseases	2018-4-11	n/a	major	Contig	full	CLC Genomic Workbench v. 9.0	350.8x	Illumina MiniSeq		GCA_003115095.1	GCF_003115095.1	yes
NZ_BFCU01000360.1	323	100	100		ASM311509v1	Klebsiella pneumoniae (enterobacteria)	strain=MH13-191M	573	SAMD00112936	PRJDB6655	National Institute of Infectious Diseases	2018-4-11	n/a	major	Contig	full	CLC Genomic Workbench v. 9.0	350.8x	Illumina MiniSeq		GCA_003115095.1	GCF_003115095.1	yes
NZ_BFCU01000361.1	361	99.45	100		ASM311509v1	Klebsiella pneumoniae (enterobacteria)	strain=MH13-191M	573	SAMD00112936	PRJDB6655	National Institute of Infectious Diseases	2018-4-11	n/a	major	Contig	full	CLC Genomic Workbench v. 9.0	350.8x	Illumina MiniSeq		GCA_003115095.1	GCF_003115095.1	yes
NZ_BFCU01000363.1	329	99.7	100		ASM311509v1	Klebsiella pneumoniae (enterobacteria)	strain=MH13-191M	573	SAMD00112936	PRJDB6655	National Institute of Infectious Diseases	2018-4-11	n/a	major	Contig	full	CLC Genomic Workbench v. 9.0	350.8x	Illumina MiniSeq		GCA_003115095.1	GCF_003115095.1	yes
NZ_BFCU01000364.1	389	100	100		ASM311509v1	Klebsiella pneumoniae (enterobacteria)	strain=MH13-191M	573	SAMD00112936	PRJDB6655	National Institute of Infectious Diseases	2018-4-11	n/a	major	Contig	full	CLC Genomic Workbench v. 9.0	350.8x	Illumina MiniSeq		GCA_003115095.1	GCF_003115095.1	yes
NZ_BFCU01000370.1	374	99.73	100		ASM311509v1	Klebsiella pneumoniae (enterobacteria)	strain=MH13-191M	573	SAMD00112936	PRJDB6655	National Institute of Infectious Diseases	2018-4-11	n/a	major	Contig	full	CLC Genomic Workbench v. 9.0	350.8x	Illumina MiniSeq		GCA_003115095.1	GCF_003115095.1	yes
NZ_BFCU01000371.1	299	99.66	99.33		ASM311509v1	Klebsiella pneumoniae (enterobacteria)	strain=MH13-191M	573	SAMD00112936	PRJDB6655	National Institute of Infectious Diseases	2018-4-11	n/a	major	Contig	full	CLC Genomic Workbench v. 9.0	350.8x	Illumina MiniSeq		GCA_003115095.1	GCF_003115095.1	yes
NZ_BFCW01000106.1	339	99.71	100		ASM311513v1	Klebsiella pneumoniae (enterobacteria)	strain=MH17-010D	573	SAMD00112938	PRJDB6655	National Institute of Infectious Diseases	2018-4-11	n/a	major	Contig	full	CLC Genomic Workbench v. 9.0	261.8x	Illumina HiSeq 4000		GCA_003115135.1	GCF_003115135.1	yes
NZ_BFCW01000113.1	603	99.84	100	WP_108961784.1	ASM311513v1	Klebsiella pneumoniae (enterobacteria)	strain=MH17-010D	573	SAMD00112938	PRJDB6655	National Institute of Infectious Diseases	2018-4-11	n/a	major	Contig	full	CLC Genomic Workbench v. 9.0	261.8x	Illumina HiSeq 4000		GCA_003115135.1	GCF_003115135.1	yes
NZ_BFCW01000154.1	342	98.83	100	WP_109027998.1	ASM311513v1	Klebsiella pneumoniae (enterobacteria)	strain=MH17-010D	573	SAMD00112938	PRJDB6655	National Institute of Infectious Diseases	2018-4-11	n/a	major	Contig	full	CLC Genomic Workbench v. 9.0	261.8x	Illumina HiSeq 4000		GCA_003115135.1	GCF_003115135.1	yes
NZ_BFCX01000117.1	128	100	100		ASM311515v1	Klebsiella pneumoniae (enterobacteria)	strain=MH17-007D	573	SAMD00112939	PRJDB6655	National Institute of Infectious Diseases	2018-4-11	n/a	major	Contig	full	CLC Genomic Workbench v. 9.0	131.1x	Illumina HiSeq 4000		GCA_003115155.1	GCF_003115155.1	yes
NZ_BFCX01000149.1	146	100	100		ASM311515v1	Klebsiella pneumoniae (enterobacteria)	strain=MH17-007D	573	SAMD00112939	PRJDB6655	National Institute of Infectious Diseases	2018-4-11	n/a	major	Contig	full	CLC Genomic Workbench v. 9.0	131.1x	Illumina HiSeq 4000		GCA_003115155.1	GCF_003115155.1	yes
NZ_BFDB01000146.1	589	99.83	96.1	WP_108998590.1	ASM311523v1	Klebsiella pneumoniae (enterobacteria)	strain=MH17-017D	573	SAMD00112943	PRJDB6655	National Institute of Infectious Diseases	2018-4-11	n/a	major	Contig	full	CLC Genomic Workbench v. 9.0	203.0x	Illumina HiSeq 4000		GCA_003115235.1	GCF_003115235.1	yes
NZ_BFDB01000187.1	607	99.83	99.34	WP_108961784.1	ASM311523v1	Klebsiella pneumoniae (enterobacteria)	strain=MH17-017D	573	SAMD00112943	PRJDB6655	National Institute of Infectious Diseases	2018-4-11	n/a	major	Contig	full	CLC Genomic Workbench v. 9.0	203.0x	Illumina HiSeq 4000		GCA_003115235.1	GCF_003115235.1	yes
NZ_BFDB01000220.1	464	99.78	100		ASM311523v1	Klebsiella pneumoniae (enterobacteria)	strain=MH17-017D	573	SAMD00112943	PRJDB6655	National Institute of Infectious Diseases	2018-4-11	n/a	major	Contig	full	CLC Genomic Workbench v. 9.0	203.0x	Illumina HiSeq 4000		GCA_003115235.1	GCF_003115235.1	yes
NZ_BFDB01000238.1	631	99.37	100		ASM311523v1	Klebsiella pneumoniae (enterobacteria)	strain=MH17-017D	573	SAMD00112943	PRJDB6655	National Institute of Infectious Diseases	2018-4-11	n/a	major	Contig	full	CLC Genomic Workbench v. 9.0	203.0x	Illumina HiSeq 4000		GCA_003115235.1	GCF_003115235.1	yes
NZ_BFDB01000245.1	317	99.69	99.37	WP_108998610.1	ASM311523v1	Klebsiella pneumoniae (enterobacteria)	strain=MH17-017D	573	SAMD00112943	PRJDB6655	National Institute of Infectious Diseases	2018-4-11	n/a	major	Contig	full	CLC Genomic Workbench v. 9.0	203.0x	Illumina HiSeq 4000		GCA_003115235.1	GCF_003115235.1	yes
NZ_BFDG01000158.1	392	99.23	100	WP_108996622.1	ASM311533v1	Klebsiella pneumoniae (enterobacteria)	strain=MH17-011M	573	SAMD00112948	PRJDB6655	National Institute of Infectious Diseases	2018-4-11	n/a	major	Contig	full	CLC Genomic Workbench v. 9.0	182.1x	Illumina HiSeq 4000		GCA_003115335.1	GCF_003115335.1	yes
NZ_BFDG01000169.1	427	99.3	100		ASM311533v1	Klebsiella pneumoniae (enterobacteria)	strain=MH17-011M	573	SAMD00112948	PRJDB6655	National Institute of Infectious Diseases	2018-4-11	n/a	major	Contig	full	CLC Genomic Workbench v. 9.0	182.1x	Illumina HiSeq 4000		GCA_003115335.1	GCF_003115335.1	yes
NZ_BFDG01000186.1	416	100	100		ASM311533v1	Klebsiella pneumoniae (enterobacteria)	strain=MH17-011M	573	SAMD00112948	PRJDB6655	National Institute of Infectious Diseases	2018-4-11	n/a	major	Contig	full	CLC Genomic Workbench v. 9.0	182.1x	Illumina HiSeq 4000		GCA_003115335.1	GCF_003115335.1	yes
NZ_BFDG01000193.1	360	100	100	WP_108996626.1	ASM311533v1	Klebsiella pneumoniae (enterobacteria)	strain=MH17-011M	573	SAMD00112948	PRJDB6655	National Institute of Infectious Diseases	2018-4-11	n/a	major	Contig	full	CLC Genomic Workbench v. 9.0	182.1x	Illumina HiSeq 4000		GCA_003115335.1	GCF_003115335.1	yes
NZ_BGKV01000132.1	434	98.62	100		ASM317547v1	Proteus mirabilis (enterobacteria)	strain=TUM11570	584	SAMD00115675	PRJDB6851	Toho University	2018-5-25	n/a	major	Contig	full	SPAdes v. 3.11	31.3x	illumina MiSeq		GCA_003175475.1	GCF_003175475.1	yes
NZ_BGKW01000116.1	456	99.56	100		ASM317549v1	Proteus mirabilis (enterobacteria)	strain=TUM11571	584	SAMD00115676	PRJDB6851	Toho University	2018-5-25	n/a	major	Contig	full	SPAdes v. 3.11	41.5x	illumina MiSeq		GCA_003175495.1	GCF_003175495.1	yes
NZ_BGLJ01000593.1	483	99.79	100		ASM317597v1	Escherichia coli (E. coli)	strain=TUM1522	562	SAMD00115689	PRJDB6851	Toho University	2018-5-25	n/a	major	Contig	full	SPAdes v. 3.11	379.2x	illumina MiSeq		GCA_003175975.1	GCF_003175975.1	yes
NZ_BGLU01000144.1	447	100	100		ASM317635v1	Escherichia coli (E. coli)	strain=TUM1825	562	SAMD00115700	PRJDB6851	Toho University	2018-5-25	n/a	major	Contig	full	SPAdes v. 3.11	56.2x	illumina MiSeq		GCA_003176355.1	GCF_003176355.1	yes
NZ_BGMI01000066.1	484	99.79	100	WP_109913356.1	ASM317663v1	Providencia rettgeri (enterobacteria)	strain=TUM9994	587	SAMD00115714	PRJDB6851	Toho University	2018-5-25	n/a	major	Contig	full	SPAdes v. 3.11	74.9x	illumina MiSeq		GCA_003176635.1	GCF_003176635.1	yes
NZ_BGMI01000078.1	434	99.54	100		ASM317663v1	Providencia rettgeri (enterobacteria)	strain=TUM9994	587	SAMD00115714	PRJDB6851	Toho University	2018-5-25	n/a	major	Contig	full	SPAdes v. 3.11	74.9x	illumina MiSeq		GCA_003176635.1	GCF_003176635.1	yes
NZ_BGMI01000079.1	434	99.77	100		ASM317663v1	Providencia rettgeri (enterobacteria)	strain=TUM9994	587	SAMD00115714	PRJDB6851	Toho University	2018-5-25	n/a	major	Contig	full	SPAdes v. 3.11	74.9x	illumina MiSeq		GCA_003176635.1	GCF_003176635.1	yes
NZ_BGNB01000174.1	150	100	100		ASM320329v1	Escherichia coli (E. coli)	strain=MH16-331M	562	SAMD00117344	PRJDB6655	National Institute of Infectious Diseases	2018-5-30	n/a	major	Contig	full	CLC Genomic Workbench v. 9.0	191.6x	Illumina HiSeq4000		GCA_003203295.1	GCF_003203295.1	yes
NZ_BGNB01000175.1	150	100	100		ASM320329v1	Escherichia coli (E. coli)	strain=MH16-331M	562	SAMD00117344	PRJDB6655	National Institute of Infectious Diseases	2018-5-30	n/a	major	Contig	full	CLC Genomic Workbench v. 9.0	191.6x	Illumina HiSeq4000		GCA_003203295.1	GCF_003203295.1	yes
NZ_BGNE01000121.1	622	99.83	92.44	WP_109027992.1	ASM320335v1	Escherichia coli (E. coli)	strain=MH17-014Ds	562	SAMD00117347	PRJDB6655	National Institute of Infectious Diseases	2018-5-30	n/a	major	Contig	full	CLC Genomic Workbench v. 9.0	41.1x	Illumina HiSeq4000		GCA_003203355.1	GCF_003203355.1	yes
NZ_BGRS01000109.1	533	100	100		ASM329934v1	Escherichia coli (E. coli)	strain=TUM18583	562	SAMD00126408	PRJDB7087	Toho University	2018-6-29	n/a	major	Contig	full	SPAdes v. 3.11	34.5x	illumina MiSeq		GCA_003299345.1	GCF_003299345.1	yes
NZ_BGRS01000111.1	513	100	100		ASM329934v1	Escherichia coli (E. coli)	strain=TUM18583	562	SAMD00126408	PRJDB7087	Toho University	2018-6-29	n/a	major	Contig	full	SPAdes v. 3.11	34.5x	illumina MiSeq		GCA_003299345.1	GCF_003299345.1	yes
NZ_BGRS01000122.1	468	99.57	100	WP_113287144.1	ASM329934v1	Escherichia coli (E. coli)	strain=TUM18583	562	SAMD00126408	PRJDB7087	Toho University	2018-6-29	n/a	major	Contig	full	SPAdes v. 3.11	34.5x	illumina MiSeq		GCA_003299345.1	GCF_003299345.1	yes
NZ_BGRS01000124.1	462	100	100		ASM329934v1	Escherichia coli (E. coli)	strain=TUM18583	562	SAMD00126408	PRJDB7087	Toho University	2018-6-29	n/a	major	Contig	full	SPAdes v. 3.11	34.5x	illumina MiSeq		GCA_003299345.1	GCF_003299345.1	yes
NZ_BGRS01000129.1	441	100	100		ASM329934v1	Escherichia coli (E. coli)	strain=TUM18583	562	SAMD00126408	PRJDB7087	Toho University	2018-6-29	n/a	major	Contig	full	SPAdes v. 3.11	34.5x	illumina MiSeq		GCA_003299345.1	GCF_003299345.1	yes
NZ_BGRS01000132.1	430	99.53	100		ASM329934v1	Escherichia coli (E. coli)	strain=TUM18583	562	SAMD00126408	PRJDB7087	Toho University	2018-6-29	n/a	major	Contig	full	SPAdes v. 3.11	34.5x	illumina MiSeq		GCA_003299345.1	GCF_003299345.1	yes
NZ_BGRS01000133.1	424	100	100		ASM329934v1	Escherichia coli (E. coli)	strain=TUM18583	562	SAMD00126408	PRJDB7087	Toho University	2018-6-29	n/a	major	Contig	full	SPAdes v. 3.11	34.5x	illumina MiSeq		GCA_003299345.1	GCF_003299345.1	yes
NZ_BGTG01000053.1	455	100	100		ASM330082v1	Escherichia coli (E. coli)	strain=TUM18623	562	SAMD00126448	PRJDB7087	Toho University	2018-6-29	n/a	major	Contig	full	SPAdes v. 3.11	20.1x	illumina MiSeq		GCA_003300825.1	GCF_003300825.1	yes
NZ_CACK01000288.1	241	100	92.12		ASM20878v1	Wolbachia endosymbiont of Culex pipiens molestus (a-proteobacteria)		263438	SAMEA2272196	PRJEA52451	Wellcome Trust Sanger Institute	2010-12-1	n/a	major	Contig	full				Representative Genome	GCA_000208785.1	GCF_000208785.1	yes
NZ_CACK01000514.1	245	99.18	100		ASM20878v1	Wolbachia endosymbiont of Culex pipiens molestus (a-proteobacteria)		263438	SAMEA2272196	PRJEA52451	Wellcome Trust Sanger Institute	2010-12-1	n/a	major	Contig	full				Representative Genome	GCA_000208785.1	GCF_000208785.1	yes
NZ_CAEU01000097.1	209	99.52	100		ASM28555v1	Kurthia massiliensis (firmicutes)	strain=JC30T	1033739	SAMEA2272071	PRJEA70831	laboratoire URMITE CNRS 6236	2012-7-19	n/a	major	Scaffold	full				Representative Genome	GCA_000285555.1	GCF_000285555.1	yes
NZ_CAEU01000106.1	175	98.86	100		ASM28555v1	Kurthia massiliensis (firmicutes)	strain=JC30T	1033739	SAMEA2272071	PRJEA70831	laboratoire URMITE CNRS 6236	2012-7-19	n/a	major	Scaffold	full				Representative Genome	GCA_000285555.1	GCF_000285555.1	yes
NZ_CDFS01000087.1	241	100	100		PAE221	Pseudomonas aeruginosa (g-proteobacteria)	strain=Pae221_ST274	287	SAMEA2795755	PRJEB7414	ERA7	2014-12-1	n/a	major	Contig	full		189x			GCA_000825745.1	GCF_000825745.1	yes
NZ_CDFS01000088.1	240	100	100		PAE221	Pseudomonas aeruginosa (g-proteobacteria)	strain=Pae221_ST274	287	SAMEA2795755	PRJEB7414	ERA7	2014-12-1	n/a	major	Contig	full		189x			GCA_000825745.1	GCF_000825745.1	yes
NZ_CDFS01000089.1	241	100	100		PAE221	Pseudomonas aeruginosa (g-proteobacteria)	strain=Pae221_ST274	287	SAMEA2795755	PRJEB7414	ERA7	2014-12-1	n/a	major	Contig	full		189x			GCA_000825745.1	GCF_000825745.1	yes
NZ_CDFS01000090.1	241	100	100		PAE221	Pseudomonas aeruginosa (g-proteobacteria)	strain=Pae221_ST274	287	SAMEA2795755	PRJEB7414	ERA7	2014-12-1	n/a	major	Contig	full		189x			GCA_000825745.1	GCF_000825745.1	yes
NZ_CDFS01000091.1	240	100	100		PAE221	Pseudomonas aeruginosa (g-proteobacteria)	strain=Pae221_ST274	287	SAMEA2795755	PRJEB7414	ERA7	2014-12-1	n/a	major	Contig	full		189x			GCA_000825745.1	GCF_000825745.1	yes
NZ_CDFS01000092.1	215	100	100		PAE221	Pseudomonas aeruginosa (g-proteobacteria)	strain=Pae221_ST274	287	SAMEA2795755	PRJEB7414	ERA7	2014-12-1	n/a	major	Contig	full		189x			GCA_000825745.1	GCF_000825745.1	yes
NZ_CDFS01000095.1	215	99.53	100		PAE221	Pseudomonas aeruginosa (g-proteobacteria)	strain=Pae221_ST274	287	SAMEA2795755	PRJEB7414	ERA7	2014-12-1	n/a	major	Contig	full		189x			GCA_000825745.1	GCF_000825745.1	yes
NZ_CDFS01000096.1	215	100	100	WP_079396152.1	PAE221	Pseudomonas aeruginosa (g-proteobacteria)	strain=Pae221_ST274	287	SAMEA2795755	PRJEB7414	ERA7	2014-12-1	n/a	major	Contig	full		189x			GCA_000825745.1	GCF_000825745.1	yes
NZ_CDFS01000097.1	215	99.53	100		PAE221	Pseudomonas aeruginosa (g-proteobacteria)	strain=Pae221_ST274	287	SAMEA2795755	PRJEB7414	ERA7	2014-12-1	n/a	major	Contig	full		189x			GCA_000825745.1	GCF_000825745.1	yes
NZ_CDFS01000098.1	215	99.53	100		PAE221	Pseudomonas aeruginosa (g-proteobacteria)	strain=Pae221_ST274	287	SAMEA2795755	PRJEB7414	ERA7	2014-12-1	n/a	major	Contig	full		189x			GCA_000825745.1	GCF_000825745.1	yes
NZ_CDFS01000100.1	216	97.67	99.54		PAE221	Pseudomonas aeruginosa (g-proteobacteria)	strain=Pae221_ST274	287	SAMEA2795755	PRJEB7414	ERA7	2014-12-1	n/a	major	Contig	full		189x			GCA_000825745.1	GCF_000825745.1	yes
NZ_CDFS01000101.1	216	100	100		PAE221	Pseudomonas aeruginosa (g-proteobacteria)	strain=Pae221_ST274	287	SAMEA2795755	PRJEB7414	ERA7	2014-12-1	n/a	major	Contig	full		189x			GCA_000825745.1	GCF_000825745.1	yes
NZ_CDFS01000102.1	244	100	100		PAE221	Pseudomonas aeruginosa (g-proteobacteria)	strain=Pae221_ST274	287	SAMEA2795755	PRJEB7414	ERA7	2014-12-1	n/a	major	Contig	full		189x			GCA_000825745.1	GCF_000825745.1	yes
NZ_CDFS01000103.1	242	100	100		PAE221	Pseudomonas aeruginosa (g-proteobacteria)	strain=Pae221_ST274	287	SAMEA2795755	PRJEB7414	ERA7	2014-12-1	n/a	major	Contig	full		189x			GCA_000825745.1	GCF_000825745.1	yes
NZ_CDFS01000104.1	242	100	100		PAE221	Pseudomonas aeruginosa (g-proteobacteria)	strain=Pae221_ST274	287	SAMEA2795755	PRJEB7414	ERA7	2014-12-1	n/a	major	Contig	full		189x			GCA_000825745.1	GCF_000825745.1	yes
NZ_CDFS01000105.1	243	97.38	94.24		PAE221	Pseudomonas aeruginosa (g-proteobacteria)	strain=Pae221_ST274	287	SAMEA2795755	PRJEB7414	ERA7	2014-12-1	n/a	major	Contig	full		189x			GCA_000825745.1	GCF_000825745.1	yes
NZ_CDFS01000106.1	244	100	100		PAE221	Pseudomonas aeruginosa (g-proteobacteria)	strain=Pae221_ST274	287	SAMEA2795755	PRJEB7414	ERA7	2014-12-1	n/a	major	Contig	full		189x			GCA_000825745.1	GCF_000825745.1	yes
NZ_CDFS01000108.1	246	100	100		PAE221	Pseudomonas aeruginosa (g-proteobacteria)	strain=Pae221_ST274	287	SAMEA2795755	PRJEB7414	ERA7	2014-12-1	n/a	major	Contig	full		189x			GCA_000825745.1	GCF_000825745.1	yes
NZ_CDFS01000109.1	246	100	100		PAE221	Pseudomonas aeruginosa (g-proteobacteria)	strain=Pae221_ST274	287	SAMEA2795755	PRJEB7414	ERA7	2014-12-1	n/a	major	Contig	full		189x			GCA_000825745.1	GCF_000825745.1	yes
NZ_CDFS01000110.1	246	99.59	100		PAE221	Pseudomonas aeruginosa (g-proteobacteria)	strain=Pae221_ST274	287	SAMEA2795755	PRJEB7414	ERA7	2014-12-1	n/a	major	Contig	full		189x			GCA_000825745.1	GCF_000825745.1	yes
NZ_CDFS01000111.1	245	100	100		PAE221	Pseudomonas aeruginosa (g-proteobacteria)	strain=Pae221_ST274	287	SAMEA2795755	PRJEB7414	ERA7	2014-12-1	n/a	major	Contig	full		189x			GCA_000825745.1	GCF_000825745.1	yes
NZ_CDFS01000113.1	217	100	100		PAE221	Pseudomonas aeruginosa (g-proteobacteria)	strain=Pae221_ST274	287	SAMEA2795755	PRJEB7414	ERA7	2014-12-1	n/a	major	Contig	full		189x			GCA_000825745.1	GCF_000825745.1	yes
NZ_CDFS01000114.1	217	96.77	100		PAE221	Pseudomonas aeruginosa (g-proteobacteria)	strain=Pae221_ST274	287	SAMEA2795755	PRJEB7414	ERA7	2014-12-1	n/a	major	Contig	full		189x			GCA_000825745.1	GCF_000825745.1	yes
NZ_CDFS01000115.1	217	100	100		PAE221	Pseudomonas aeruginosa (g-proteobacteria)	strain=Pae221_ST274	287	SAMEA2795755	PRJEB7414	ERA7	2014-12-1	n/a	major	Contig	full		189x			GCA_000825745.1	GCF_000825745.1	yes
NZ_CDFS01000117.1	217	98.16	100		PAE221	Pseudomonas aeruginosa (g-proteobacteria)	strain=Pae221_ST274	287	SAMEA2795755	PRJEB7414	ERA7	2014-12-1	n/a	major	Contig	full		189x			GCA_000825745.1	GCF_000825745.1	yes
NZ_CDFS01000118.1	217	100	100		PAE221	Pseudomonas aeruginosa (g-proteobacteria)	strain=Pae221_ST274	287	SAMEA2795755	PRJEB7414	ERA7	2014-12-1	n/a	major	Contig	full		189x			GCA_000825745.1	GCF_000825745.1	yes
NZ_CDFS01000119.1	217	99.54	100		PAE221	Pseudomonas aeruginosa (g-proteobacteria)	strain=Pae221_ST274	287	SAMEA2795755	PRJEB7414	ERA7	2014-12-1	n/a	major	Contig	full		189x			GCA_000825745.1	GCF_000825745.1	yes
NZ_CDFS01000120.1	218	100	100		PAE221	Pseudomonas aeruginosa (g-proteobacteria)	strain=Pae221_ST274	287	SAMEA2795755	PRJEB7414	ERA7	2014-12-1	n/a	major	Contig	full		189x			GCA_000825745.1	GCF_000825745.1	yes
NZ_CDFS01000121.1	218	100	100		PAE221	Pseudomonas aeruginosa (g-proteobacteria)	strain=Pae221_ST274	287	SAMEA2795755	PRJEB7414	ERA7	2014-12-1	n/a	major	Contig	full		189x			GCA_000825745.1	GCF_000825745.1	yes
NZ_CDFS01000123.1	247	99.6	100		PAE221	Pseudomonas aeruginosa (g-proteobacteria)	strain=Pae221_ST274	287	SAMEA2795755	PRJEB7414	ERA7	2014-12-1	n/a	major	Contig	full		189x			GCA_000825745.1	GCF_000825745.1	yes
NZ_CDFS01000124.1	247	99.6	100		PAE221	Pseudomonas aeruginosa (g-proteobacteria)	strain=Pae221_ST274	287	SAMEA2795755	PRJEB7414	ERA7	2014-12-1	n/a	major	Contig	full		189x			GCA_000825745.1	GCF_000825745.1	yes
NZ_CDFS01000126.1	248	99.19	100		PAE221	Pseudomonas aeruginosa (g-proteobacteria)	strain=Pae221_ST274	287	SAMEA2795755	PRJEB7414	ERA7	2014-12-1	n/a	major	Contig	full		189x			GCA_000825745.1	GCF_000825745.1	yes
NZ_CDFS01000127.1	249	100	100		PAE221	Pseudomonas aeruginosa (g-proteobacteria)	strain=Pae221_ST274	287	SAMEA2795755	PRJEB7414	ERA7	2014-12-1	n/a	major	Contig	full		189x			GCA_000825745.1	GCF_000825745.1	yes
NZ_CDFS01000128.1	248	100	100		PAE221	Pseudomonas aeruginosa (g-proteobacteria)	strain=Pae221_ST274	287	SAMEA2795755	PRJEB7414	ERA7	2014-12-1	n/a	major	Contig	full		189x			GCA_000825745.1	GCF_000825745.1	yes
NZ_CDFS01000129.1	250	95.38	94.8		PAE221	Pseudomonas aeruginosa (g-proteobacteria)	strain=Pae221_ST274	287	SAMEA2795755	PRJEB7414	ERA7	2014-12-1	n/a	major	Contig	full		189x			GCA_000825745.1	GCF_000825745.1	yes
NZ_CDFS01000130.1	250	98.77	97.6		PAE221	Pseudomonas aeruginosa (g-proteobacteria)	strain=Pae221_ST274	287	SAMEA2795755	PRJEB7414	ERA7	2014-12-1	n/a	major	Contig	full		189x			GCA_000825745.1	GCF_000825745.1	yes
NZ_CDFS01000132.1	251	100	100		PAE221	Pseudomonas aeruginosa (g-proteobacteria)	strain=Pae221_ST274	287	SAMEA2795755	PRJEB7414	ERA7	2014-12-1	n/a	major	Contig	full		189x			GCA_000825745.1	GCF_000825745.1	yes
NZ_CDFS01000134.1	252	99.6	100		PAE221	Pseudomonas aeruginosa (g-proteobacteria)	strain=Pae221_ST274	287	SAMEA2795755	PRJEB7414	ERA7	2014-12-1	n/a	major	Contig	full		189x			GCA_000825745.1	GCF_000825745.1	yes
NZ_CDFS01000135.1	252	100	100		PAE221	Pseudomonas aeruginosa (g-proteobacteria)	strain=Pae221_ST274	287	SAMEA2795755	PRJEB7414	ERA7	2014-12-1	n/a	major	Contig	full		189x			GCA_000825745.1	GCF_000825745.1	yes
NZ_CDFS01000136.1	253	100	100		PAE221	Pseudomonas aeruginosa (g-proteobacteria)	strain=Pae221_ST274	287	SAMEA2795755	PRJEB7414	ERA7	2014-12-1	n/a	major	Contig	full		189x			GCA_000825745.1	GCF_000825745.1	yes
NZ_CDFS01000139.1	252	100	100		PAE221	Pseudomonas aeruginosa (g-proteobacteria)	strain=Pae221_ST274	287	SAMEA2795755	PRJEB7414	ERA7	2014-12-1	n/a	major	Contig	full		189x			GCA_000825745.1	GCF_000825745.1	yes
NZ_CDFS01000140.1	256	99.61	100		PAE221	Pseudomonas aeruginosa (g-proteobacteria)	strain=Pae221_ST274	287	SAMEA2795755	PRJEB7414	ERA7	2014-12-1	n/a	major	Contig	full		189x			GCA_000825745.1	GCF_000825745.1	yes
NZ_CDFS01000141.1	256	100	100		PAE221	Pseudomonas aeruginosa (g-proteobacteria)	strain=Pae221_ST274	287	SAMEA2795755	PRJEB7414	ERA7	2014-12-1	n/a	major	Contig	full		189x			GCA_000825745.1	GCF_000825745.1	yes
NZ_CDFS01000142.1	255	99.61	100		PAE221	Pseudomonas aeruginosa (g-proteobacteria)	strain=Pae221_ST274	287	SAMEA2795755	PRJEB7414	ERA7	2014-12-1	n/a	major	Contig	full		189x			GCA_000825745.1	GCF_000825745.1	yes
NZ_CDFS01000144.1	256	100	100		PAE221	Pseudomonas aeruginosa (g-proteobacteria)	strain=Pae221_ST274	287	SAMEA2795755	PRJEB7414	ERA7	2014-12-1	n/a	major	Contig	full		189x			GCA_000825745.1	GCF_000825745.1	yes
NZ_CDFS01000145.1	257	97.28	100		PAE221	Pseudomonas aeruginosa (g-proteobacteria)	strain=Pae221_ST274	287	SAMEA2795755	PRJEB7414	ERA7	2014-12-1	n/a	major	Contig	full		189x			GCA_000825745.1	GCF_000825745.1	yes
NZ_CDFS01000152.1	395	100	100		PAE221	Pseudomonas aeruginosa (g-proteobacteria)	strain=Pae221_ST274	287	SAMEA2795755	PRJEB7414	ERA7	2014-12-1	n/a	major	Contig	full		189x			GCA_000825745.1	GCF_000825745.1	yes
NZ_CDFS01000159.1	314	99.36	100		PAE221	Pseudomonas aeruginosa (g-proteobacteria)	strain=Pae221_ST274	287	SAMEA2795755	PRJEB7414	ERA7	2014-12-1	n/a	major	Contig	full		189x			GCA_000825745.1	GCF_000825745.1	yes
NZ_CDFS01000160.1	315	99.37	100		PAE221	Pseudomonas aeruginosa (g-proteobacteria)	strain=Pae221_ST274	287	SAMEA2795755	PRJEB7414	ERA7	2014-12-1	n/a	major	Contig	full		189x			GCA_000825745.1	GCF_000825745.1	yes
NZ_CDFS01000163.1	302	99.67	100	WP_079396154.1	PAE221	Pseudomonas aeruginosa (g-proteobacteria)	strain=Pae221_ST274	287	SAMEA2795755	PRJEB7414	ERA7	2014-12-1	n/a	major	Contig	full		189x			GCA_000825745.1	GCF_000825745.1	yes
NZ_CDFS01000164.1	215	99.53	100		PAE221	Pseudomonas aeruginosa (g-proteobacteria)	strain=Pae221_ST274	287	SAMEA2795755	PRJEB7414	ERA7	2014-12-1	n/a	major	Contig	full		189x			GCA_000825745.1	GCF_000825745.1	yes
NZ_CDFS01000166.1	280	100	100		PAE221	Pseudomonas aeruginosa (g-proteobacteria)	strain=Pae221_ST274	287	SAMEA2795755	PRJEB7414	ERA7	2014-12-1	n/a	major	Contig	full		189x			GCA_000825745.1	GCF_000825745.1	yes
NZ_CDFS01000167.1	282	95.76	100		PAE221	Pseudomonas aeruginosa (g-proteobacteria)	strain=Pae221_ST274	287	SAMEA2795755	PRJEB7414	ERA7	2014-12-1	n/a	major	Contig	full		189x			GCA_000825745.1	GCF_000825745.1	yes
NZ_CDFS01000168.1	279	99.64	100		PAE221	Pseudomonas aeruginosa (g-proteobacteria)	strain=Pae221_ST274	287	SAMEA2795755	PRJEB7414	ERA7	2014-12-1	n/a	major	Contig	full		189x			GCA_000825745.1	GCF_000825745.1	yes
NZ_CDFS01000169.1	280	99.64	100		PAE221	Pseudomonas aeruginosa (g-proteobacteria)	strain=Pae221_ST274	287	SAMEA2795755	PRJEB7414	ERA7	2014-12-1	n/a	major	Contig	full		189x			GCA_000825745.1	GCF_000825745.1	yes
NZ_CDFS01000170.1	285	99.3	100		PAE221	Pseudomonas aeruginosa (g-proteobacteria)	strain=Pae221_ST274	287	SAMEA2795755	PRJEB7414	ERA7	2014-12-1	n/a	major	Contig	full		189x			GCA_000825745.1	GCF_000825745.1	yes
NZ_CDFS01000171.1	213	99.53	100		PAE221	Pseudomonas aeruginosa (g-proteobacteria)	strain=Pae221_ST274	287	SAMEA2795755	PRJEB7414	ERA7	2014-12-1	n/a	major	Contig	full		189x			GCA_000825745.1	GCF_000825745.1	yes
NZ_CDFS01000172.1	285	100	100	WP_079396155.1	PAE221	Pseudomonas aeruginosa (g-proteobacteria)	strain=Pae221_ST274	287	SAMEA2795755	PRJEB7414	ERA7	2014-12-1	n/a	major	Contig	full		189x			GCA_000825745.1	GCF_000825745.1	yes
NZ_CDFS01000173.1	214	100	100		PAE221	Pseudomonas aeruginosa (g-proteobacteria)	strain=Pae221_ST274	287	SAMEA2795755	PRJEB7414	ERA7	2014-12-1	n/a	major	Contig	full		189x			GCA_000825745.1	GCF_000825745.1	yes
NZ_CDFS01000174.1	282	100	100		PAE221	Pseudomonas aeruginosa (g-proteobacteria)	strain=Pae221_ST274	287	SAMEA2795755	PRJEB7414	ERA7	2014-12-1	n/a	major	Contig	full		189x			GCA_000825745.1	GCF_000825745.1	yes
NZ_CDFS01000175.1	213	100	100		PAE221	Pseudomonas aeruginosa (g-proteobacteria)	strain=Pae221_ST274	287	SAMEA2795755	PRJEB7414	ERA7	2014-12-1	n/a	major	Contig	full		189x			GCA_000825745.1	GCF_000825745.1	yes
NZ_CDFS01000176.1	282	99.29	100		PAE221	Pseudomonas aeruginosa (g-proteobacteria)	strain=Pae221_ST274	287	SAMEA2795755	PRJEB7414	ERA7	2014-12-1	n/a	major	Contig	full		189x			GCA_000825745.1	GCF_000825745.1	yes
NZ_CDFS01000177.1	213	100	100		PAE221	Pseudomonas aeruginosa (g-proteobacteria)	strain=Pae221_ST274	287	SAMEA2795755	PRJEB7414	ERA7	2014-12-1	n/a	major	Contig	full		189x			GCA_000825745.1	GCF_000825745.1	yes
NZ_CDFS01000178.1	214	100	100		PAE221	Pseudomonas aeruginosa (g-proteobacteria)	strain=Pae221_ST274	287	SAMEA2795755	PRJEB7414	ERA7	2014-12-1	n/a	major	Contig	full		189x			GCA_000825745.1	GCF_000825745.1	yes
NZ_CDFS01000179.1	214	100	100		PAE221	Pseudomonas aeruginosa (g-proteobacteria)	strain=Pae221_ST274	287	SAMEA2795755	PRJEB7414	ERA7	2014-12-1	n/a	major	Contig	full		189x			GCA_000825745.1	GCF_000825745.1	yes
NZ_CDFS01000180.1	286	100	100		PAE221	Pseudomonas aeruginosa (g-proteobacteria)	strain=Pae221_ST274	287	SAMEA2795755	PRJEB7414	ERA7	2014-12-1	n/a	major	Contig	full		189x			GCA_000825745.1	GCF_000825745.1	yes
NZ_CDFS01000181.1	214	100	100		PAE221	Pseudomonas aeruginosa (g-proteobacteria)	strain=Pae221_ST274	287	SAMEA2795755	PRJEB7414	ERA7	2014-12-1	n/a	major	Contig	full		189x			GCA_000825745.1	GCF_000825745.1	yes
NZ_CDFS01000183.1	213	99.06	100		PAE221	Pseudomonas aeruginosa (g-proteobacteria)	strain=Pae221_ST274	287	SAMEA2795755	PRJEB7414	ERA7	2014-12-1	n/a	major	Contig	full		189x			GCA_000825745.1	GCF_000825745.1	yes
NZ_CDFS01000184.1	213	99.53	100		PAE221	Pseudomonas aeruginosa (g-proteobacteria)	strain=Pae221_ST274	287	SAMEA2795755	PRJEB7414	ERA7	2014-12-1	n/a	major	Contig	full		189x			GCA_000825745.1	GCF_000825745.1	yes
NZ_CDFS01000186.1	213	99.06	100		PAE221	Pseudomonas aeruginosa (g-proteobacteria)	strain=Pae221_ST274	287	SAMEA2795755	PRJEB7414	ERA7	2014-12-1	n/a	major	Contig	full		189x			GCA_000825745.1	GCF_000825745.1	yes
NZ_CDFS01000187.1	290	100	100		PAE221	Pseudomonas aeruginosa (g-proteobacteria)	strain=Pae221_ST274	287	SAMEA2795755	PRJEB7414	ERA7	2014-12-1	n/a	major	Contig	full		189x			GCA_000825745.1	GCF_000825745.1	yes
NZ_CDFS01000188.1	291	100	100		PAE221	Pseudomonas aeruginosa (g-proteobacteria)	strain=Pae221_ST274	287	SAMEA2795755	PRJEB7414	ERA7	2014-12-1	n/a	major	Contig	full		189x			GCA_000825745.1	GCF_000825745.1	yes
NZ_CDFS01000189.1	292	100	100		PAE221	Pseudomonas aeruginosa (g-proteobacteria)	strain=Pae221_ST274	287	SAMEA2795755	PRJEB7414	ERA7	2014-12-1	n/a	major	Contig	full		189x			GCA_000825745.1	GCF_000825745.1	yes
NZ_CDFS01000190.1	294	100	100		PAE221	Pseudomonas aeruginosa (g-proteobacteria)	strain=Pae221_ST274	287	SAMEA2795755	PRJEB7414	ERA7	2014-12-1	n/a	major	Contig	full		189x			GCA_000825745.1	GCF_000825745.1	yes
NZ_CDFS01000191.1	296	100	100		PAE221	Pseudomonas aeruginosa (g-proteobacteria)	strain=Pae221_ST274	287	SAMEA2795755	PRJEB7414	ERA7	2014-12-1	n/a	major	Contig	full		189x			GCA_000825745.1	GCF_000825745.1	yes
NZ_CDFS01000192.1	296	100	100		PAE221	Pseudomonas aeruginosa (g-proteobacteria)	strain=Pae221_ST274	287	SAMEA2795755	PRJEB7414	ERA7	2014-12-1	n/a	major	Contig	full		189x			GCA_000825745.1	GCF_000825745.1	yes
NZ_CDFS01000193.1	211	100	100	WP_079396156.1	PAE221	Pseudomonas aeruginosa (g-proteobacteria)	strain=Pae221_ST274	287	SAMEA2795755	PRJEB7414	ERA7	2014-12-1	n/a	major	Contig	full		189x			GCA_000825745.1	GCF_000825745.1	yes
NZ_CDFS01000194.1	297	100	100		PAE221	Pseudomonas aeruginosa (g-proteobacteria)	strain=Pae221_ST274	287	SAMEA2795755	PRJEB7414	ERA7	2014-12-1	n/a	major	Contig	full		189x			GCA_000825745.1	GCF_000825745.1	yes
NZ_CDFS01000196.1	298	100	100		PAE221	Pseudomonas aeruginosa (g-proteobacteria)	strain=Pae221_ST274	287	SAMEA2795755	PRJEB7414	ERA7	2014-12-1	n/a	major	Contig	full		189x			GCA_000825745.1	GCF_000825745.1	yes
NZ_CDFS01000198.1	212	100	100		PAE221	Pseudomonas aeruginosa (g-proteobacteria)	strain=Pae221_ST274	287	SAMEA2795755	PRJEB7414	ERA7	2014-12-1	n/a	major	Contig	full		189x			GCA_000825745.1	GCF_000825745.1	yes
NZ_CDFS01000199.1	212	100	100		PAE221	Pseudomonas aeruginosa (g-proteobacteria)	strain=Pae221_ST274	287	SAMEA2795755	PRJEB7414	ERA7	2014-12-1	n/a	major	Contig	full		189x			GCA_000825745.1	GCF_000825745.1	yes
NZ_CDFS01000200.1	212	100	100		PAE221	Pseudomonas aeruginosa (g-proteobacteria)	strain=Pae221_ST274	287	SAMEA2795755	PRJEB7414	ERA7	2014-12-1	n/a	major	Contig	full		189x			GCA_000825745.1	GCF_000825745.1	yes
NZ_CDFS01000201.1	212	100	100		PAE221	Pseudomonas aeruginosa (g-proteobacteria)	strain=Pae221_ST274	287	SAMEA2795755	PRJEB7414	ERA7	2014-12-1	n/a	major	Contig	full		189x			GCA_000825745.1	GCF_000825745.1	yes
NZ_CDFS01000202.1	272	99.63	100	WP_079396157.1	PAE221	Pseudomonas aeruginosa (g-proteobacteria)	strain=Pae221_ST274	287	SAMEA2795755	PRJEB7414	ERA7	2014-12-1	n/a	major	Contig	full		189x			GCA_000825745.1	GCF_000825745.1	yes
NZ_CDFS01000204.1	270	100	100		PAE221	Pseudomonas aeruginosa (g-proteobacteria)	strain=Pae221_ST274	287	SAMEA2795755	PRJEB7414	ERA7	2014-12-1	n/a	major	Contig	full		189x			GCA_000825745.1	GCF_000825745.1	yes
NZ_CDFS01000205.1	269	99.63	99.63		PAE221	Pseudomonas aeruginosa (g-proteobacteria)	strain=Pae221_ST274	287	SAMEA2795755	PRJEB7414	ERA7	2014-12-1	n/a	major	Contig	full		189x			GCA_000825745.1	GCF_000825745.1	yes
NZ_CDFS01000207.1	268	100	100		PAE221	Pseudomonas aeruginosa (g-proteobacteria)	strain=Pae221_ST274	287	SAMEA2795755	PRJEB7414	ERA7	2014-12-1	n/a	major	Contig	full		189x			GCA_000825745.1	GCF_000825745.1	yes
NZ_CDFS01000208.1	268	98.13	100		PAE221	Pseudomonas aeruginosa (g-proteobacteria)	strain=Pae221_ST274	287	SAMEA2795755	PRJEB7414	ERA7	2014-12-1	n/a	major	Contig	full		189x			GCA_000825745.1	GCF_000825745.1	yes
NZ_CDFS01000214.1	274	100	100		PAE221	Pseudomonas aeruginosa (g-proteobacteria)	strain=Pae221_ST274	287	SAMEA2795755	PRJEB7414	ERA7	2014-12-1	n/a	major	Contig	full		189x			GCA_000825745.1	GCF_000825745.1	yes
NZ_CDFS01000217.1	274	100	100		PAE221	Pseudomonas aeruginosa (g-proteobacteria)	strain=Pae221_ST274	287	SAMEA2795755	PRJEB7414	ERA7	2014-12-1	n/a	major	Contig	full		189x			GCA_000825745.1	GCF_000825745.1	yes
NZ_CDFS01000218.1	272	100	100	WP_079396159.1	PAE221	Pseudomonas aeruginosa (g-proteobacteria)	strain=Pae221_ST274	287	SAMEA2795755	PRJEB7414	ERA7	2014-12-1	n/a	major	Contig	full		189x			GCA_000825745.1	GCF_000825745.1	yes
NZ_CDFS01000219.1	272	100	100		PAE221	Pseudomonas aeruginosa (g-proteobacteria)	strain=Pae221_ST274	287	SAMEA2795755	PRJEB7414	ERA7	2014-12-1	n/a	major	Contig	full		189x			GCA_000825745.1	GCF_000825745.1	yes
NZ_CDFS01000220.1	273	100	100		PAE221	Pseudomonas aeruginosa (g-proteobacteria)	strain=Pae221_ST274	287	SAMEA2795755	PRJEB7414	ERA7	2014-12-1	n/a	major	Contig	full		189x			GCA_000825745.1	GCF_000825745.1	yes
NZ_CDFS01000222.1	260	100	100		PAE221	Pseudomonas aeruginosa (g-proteobacteria)	strain=Pae221_ST274	287	SAMEA2795755	PRJEB7414	ERA7	2014-12-1	n/a	major	Contig	full		189x			GCA_000825745.1	GCF_000825745.1	yes
NZ_CDFS01000224.1	259	99.23	100		PAE221	Pseudomonas aeruginosa (g-proteobacteria)	strain=Pae221_ST274	287	SAMEA2795755	PRJEB7414	ERA7	2014-12-1	n/a	major	Contig	full		189x			GCA_000825745.1	GCF_000825745.1	yes
NZ_CDFS01000225.1	257	99.61	100		PAE221	Pseudomonas aeruginosa (g-proteobacteria)	strain=Pae221_ST274	287	SAMEA2795755	PRJEB7414	ERA7	2014-12-1	n/a	major	Contig	full		189x			GCA_000825745.1	GCF_000825745.1	yes
NZ_CDFS01000226.1	263	100	100		PAE221	Pseudomonas aeruginosa (g-proteobacteria)	strain=Pae221_ST274	287	SAMEA2795755	PRJEB7414	ERA7	2014-12-1	n/a	major	Contig	full		189x			GCA_000825745.1	GCF_000825745.1	yes
NZ_CDFS01000227.1	263	99.62	100		PAE221	Pseudomonas aeruginosa (g-proteobacteria)	strain=Pae221_ST274	287	SAMEA2795755	PRJEB7414	ERA7	2014-12-1	n/a	major	Contig	full		189x			GCA_000825745.1	GCF_000825745.1	yes
NZ_CDFS01000228.1	261	100	100		PAE221	Pseudomonas aeruginosa (g-proteobacteria)	strain=Pae221_ST274	287	SAMEA2795755	PRJEB7414	ERA7	2014-12-1	n/a	major	Contig	full		189x			GCA_000825745.1	GCF_000825745.1	yes
NZ_CDFS01000229.1	261	99.62	99.62		PAE221	Pseudomonas aeruginosa (g-proteobacteria)	strain=Pae221_ST274	287	SAMEA2795755	PRJEB7414	ERA7	2014-12-1	n/a	major	Contig	full		189x			GCA_000825745.1	GCF_000825745.1	yes
NZ_CDFS01000232.1	265	100	100		PAE221	Pseudomonas aeruginosa (g-proteobacteria)	strain=Pae221_ST274	287	SAMEA2795755	PRJEB7414	ERA7	2014-12-1	n/a	major	Contig	full		189x			GCA_000825745.1	GCF_000825745.1	yes
NZ_CDFS01000233.1	264	99.62	100		PAE221	Pseudomonas aeruginosa (g-proteobacteria)	strain=Pae221_ST274	287	SAMEA2795755	PRJEB7414	ERA7	2014-12-1	n/a	major	Contig	full		189x			GCA_000825745.1	GCF_000825745.1	yes
NZ_CDFS01000234.1	265	100	100		PAE221	Pseudomonas aeruginosa (g-proteobacteria)	strain=Pae221_ST274	287	SAMEA2795755	PRJEB7414	ERA7	2014-12-1	n/a	major	Contig	full		189x			GCA_000825745.1	GCF_000825745.1	yes
NZ_CDFS01000237.1	266	99.62	100		PAE221	Pseudomonas aeruginosa (g-proteobacteria)	strain=Pae221_ST274	287	SAMEA2795755	PRJEB7414	ERA7	2014-12-1	n/a	major	Contig	full		189x			GCA_000825745.1	GCF_000825745.1	yes
NZ_CDFS01000240.1	264	99.24	100		PAE221	Pseudomonas aeruginosa (g-proteobacteria)	strain=Pae221_ST274	287	SAMEA2795755	PRJEB7414	ERA7	2014-12-1	n/a	major	Contig	full		189x			GCA_000825745.1	GCF_000825745.1	yes
NZ_CDFS01000241.1	264	98.11	100		PAE221	Pseudomonas aeruginosa (g-proteobacteria)	strain=Pae221_ST274	287	SAMEA2795755	PRJEB7414	ERA7	2014-12-1	n/a	major	Contig	full		189x			GCA_000825745.1	GCF_000825745.1	yes
NZ_CDFS01000242.1	221	100	100		PAE221	Pseudomonas aeruginosa (g-proteobacteria)	strain=Pae221_ST274	287	SAMEA2795755	PRJEB7414	ERA7	2014-12-1	n/a	major	Contig	full		189x			GCA_000825745.1	GCF_000825745.1	yes
NZ_CDFS01000246.1	133	99.25	100		PAE221	Pseudomonas aeruginosa (g-proteobacteria)	strain=Pae221_ST274	287	SAMEA2795755	PRJEB7414	ERA7	2014-12-1	n/a	major	Contig	full		189x			GCA_000825745.1	GCF_000825745.1	yes
NZ_CDFS01000249.1	115	99.13	100		PAE221	Pseudomonas aeruginosa (g-proteobacteria)	strain=Pae221_ST274	287	SAMEA2795755	PRJEB7414	ERA7	2014-12-1	n/a	major	Contig	full		189x			GCA_000825745.1	GCF_000825745.1	yes
NZ_CDFS01000250.1	220	100	100		PAE221	Pseudomonas aeruginosa (g-proteobacteria)	strain=Pae221_ST274	287	SAMEA2795755	PRJEB7414	ERA7	2014-12-1	n/a	major	Contig	full		189x			GCA_000825745.1	GCF_000825745.1	yes
NZ_CDFS01000253.1	220	100	100		PAE221	Pseudomonas aeruginosa (g-proteobacteria)	strain=Pae221_ST274	287	SAMEA2795755	PRJEB7414	ERA7	2014-12-1	n/a	major	Contig	full		189x			GCA_000825745.1	GCF_000825745.1	yes
NZ_CDFS01000254.1	220	100	100		PAE221	Pseudomonas aeruginosa (g-proteobacteria)	strain=Pae221_ST274	287	SAMEA2795755	PRJEB7414	ERA7	2014-12-1	n/a	major	Contig	full		189x			GCA_000825745.1	GCF_000825745.1	yes
NZ_CDFS01000258.1	221	100	100		PAE221	Pseudomonas aeruginosa (g-proteobacteria)	strain=Pae221_ST274	287	SAMEA2795755	PRJEB7414	ERA7	2014-12-1	n/a	major	Contig	full		189x			GCA_000825745.1	GCF_000825745.1	yes
NZ_CDFS01000259.1	221	100	100		PAE221	Pseudomonas aeruginosa (g-proteobacteria)	strain=Pae221_ST274	287	SAMEA2795755	PRJEB7414	ERA7	2014-12-1	n/a	major	Contig	full		189x			GCA_000825745.1	GCF_000825745.1	yes
NZ_CDFS01000260.1	221	100	100		PAE221	Pseudomonas aeruginosa (g-proteobacteria)	strain=Pae221_ST274	287	SAMEA2795755	PRJEB7414	ERA7	2014-12-1	n/a	major	Contig	full		189x			GCA_000825745.1	GCF_000825745.1	yes
NZ_CDFS01000261.1	221	100	100		PAE221	Pseudomonas aeruginosa (g-proteobacteria)	strain=Pae221_ST274	287	SAMEA2795755	PRJEB7414	ERA7	2014-12-1	n/a	major	Contig	full		189x			GCA_000825745.1	GCF_000825745.1	yes
NZ_CDFS01000263.1	219	100	100		PAE221	Pseudomonas aeruginosa (g-proteobacteria)	strain=Pae221_ST274	287	SAMEA2795755	PRJEB7414	ERA7	2014-12-1	n/a	major	Contig	full		189x			GCA_000825745.1	GCF_000825745.1	yes
NZ_CDFS01000265.1	218	100	100		PAE221	Pseudomonas aeruginosa (g-proteobacteria)	strain=Pae221_ST274	287	SAMEA2795755	PRJEB7414	ERA7	2014-12-1	n/a	major	Contig	full		189x			GCA_000825745.1	GCF_000825745.1	yes
NZ_CDFS01000266.1	218	99.54	100		PAE221	Pseudomonas aeruginosa (g-proteobacteria)	strain=Pae221_ST274	287	SAMEA2795755	PRJEB7414	ERA7	2014-12-1	n/a	major	Contig	full		189x			GCA_000825745.1	GCF_000825745.1	yes
NZ_CDFS01000267.1	218	100	100		PAE221	Pseudomonas aeruginosa (g-proteobacteria)	strain=Pae221_ST274	287	SAMEA2795755	PRJEB7414	ERA7	2014-12-1	n/a	major	Contig	full		189x			GCA_000825745.1	GCF_000825745.1	yes
NZ_CDFS01000268.1	218	100	100		PAE221	Pseudomonas aeruginosa (g-proteobacteria)	strain=Pae221_ST274	287	SAMEA2795755	PRJEB7414	ERA7	2014-12-1	n/a	major	Contig	full		189x			GCA_000825745.1	GCF_000825745.1	yes
NZ_CDFS01000270.1	219	100	100		PAE221	Pseudomonas aeruginosa (g-proteobacteria)	strain=Pae221_ST274	287	SAMEA2795755	PRJEB7414	ERA7	2014-12-1	n/a	major	Contig	full		189x			GCA_000825745.1	GCF_000825745.1	yes
NZ_CDFS01000271.1	218	100	100		PAE221	Pseudomonas aeruginosa (g-proteobacteria)	strain=Pae221_ST274	287	SAMEA2795755	PRJEB7414	ERA7	2014-12-1	n/a	major	Contig	full		189x			GCA_000825745.1	GCF_000825745.1	yes
NZ_CDFS01000272.1	219	99.09	100		PAE221	Pseudomonas aeruginosa (g-proteobacteria)	strain=Pae221_ST274	287	SAMEA2795755	PRJEB7414	ERA7	2014-12-1	n/a	major	Contig	full		189x			GCA_000825745.1	GCF_000825745.1	yes
NZ_CDFS01000274.1	225	100	100		PAE221	Pseudomonas aeruginosa (g-proteobacteria)	strain=Pae221_ST274	287	SAMEA2795755	PRJEB7414	ERA7	2014-12-1	n/a	major	Contig	full		189x			GCA_000825745.1	GCF_000825745.1	yes
NZ_CDFS01000275.1	226	99.56	100		PAE221	Pseudomonas aeruginosa (g-proteobacteria)	strain=Pae221_ST274	287	SAMEA2795755	PRJEB7414	ERA7	2014-12-1	n/a	major	Contig	full		189x			GCA_000825745.1	GCF_000825745.1	yes
NZ_CDFS01000277.1	229	99.13	100		PAE221	Pseudomonas aeruginosa (g-proteobacteria)	strain=Pae221_ST274	287	SAMEA2795755	PRJEB7414	ERA7	2014-12-1	n/a	major	Contig	full		189x			GCA_000825745.1	GCF_000825745.1	yes
NZ_CDFS01000278.1	229	100	100		PAE221	Pseudomonas aeruginosa (g-proteobacteria)	strain=Pae221_ST274	287	SAMEA2795755	PRJEB7414	ERA7	2014-12-1	n/a	major	Contig	full		189x			GCA_000825745.1	GCF_000825745.1	yes
NZ_CDFS01000279.1	227	96.92	100		PAE221	Pseudomonas aeruginosa (g-proteobacteria)	strain=Pae221_ST274	287	SAMEA2795755	PRJEB7414	ERA7	2014-12-1	n/a	major	Contig	full		189x			GCA_000825745.1	GCF_000825745.1	yes
NZ_CDFS01000280.1	227	100	100		PAE221	Pseudomonas aeruginosa (g-proteobacteria)	strain=Pae221_ST274	287	SAMEA2795755	PRJEB7414	ERA7	2014-12-1	n/a	major	Contig	full		189x			GCA_000825745.1	GCF_000825745.1	yes
NZ_CDFS01000281.1	228	98.25	100		PAE221	Pseudomonas aeruginosa (g-proteobacteria)	strain=Pae221_ST274	287	SAMEA2795755	PRJEB7414	ERA7	2014-12-1	n/a	major	Contig	full		189x			GCA_000825745.1	GCF_000825745.1	yes
NZ_CDFS01000282.1	228	100	100		PAE221	Pseudomonas aeruginosa (g-proteobacteria)	strain=Pae221_ST274	287	SAMEA2795755	PRJEB7414	ERA7	2014-12-1	n/a	major	Contig	full		189x			GCA_000825745.1	GCF_000825745.1	yes
NZ_CDFS01000283.1	222	100	100		PAE221	Pseudomonas aeruginosa (g-proteobacteria)	strain=Pae221_ST274	287	SAMEA2795755	PRJEB7414	ERA7	2014-12-1	n/a	major	Contig	full		189x			GCA_000825745.1	GCF_000825745.1	yes
NZ_CDFS01000285.1	224	100	100		PAE221	Pseudomonas aeruginosa (g-proteobacteria)	strain=Pae221_ST274	287	SAMEA2795755	PRJEB7414	ERA7	2014-12-1	n/a	major	Contig	full		189x			GCA_000825745.1	GCF_000825745.1	yes
NZ_CDFS01000286.1	224	100	100		PAE221	Pseudomonas aeruginosa (g-proteobacteria)	strain=Pae221_ST274	287	SAMEA2795755	PRJEB7414	ERA7	2014-12-1	n/a	major	Contig	full		189x			GCA_000825745.1	GCF_000825745.1	yes
NZ_CDFS01000287.1	224	97.32	100		PAE221	Pseudomonas aeruginosa (g-proteobacteria)	strain=Pae221_ST274	287	SAMEA2795755	PRJEB7414	ERA7	2014-12-1	n/a	major	Contig	full		189x			GCA_000825745.1	GCF_000825745.1	yes
NZ_CDFS01000288.1	224	100	100		PAE221	Pseudomonas aeruginosa (g-proteobacteria)	strain=Pae221_ST274	287	SAMEA2795755	PRJEB7414	ERA7	2014-12-1	n/a	major	Contig	full		189x			GCA_000825745.1	GCF_000825745.1	yes
NZ_CDFS01000289.1	222	100	100		PAE221	Pseudomonas aeruginosa (g-proteobacteria)	strain=Pae221_ST274	287	SAMEA2795755	PRJEB7414	ERA7	2014-12-1	n/a	major	Contig	full		189x			GCA_000825745.1	GCF_000825745.1	yes
NZ_CDFS01000290.1	223	100	100		PAE221	Pseudomonas aeruginosa (g-proteobacteria)	strain=Pae221_ST274	287	SAMEA2795755	PRJEB7414	ERA7	2014-12-1	n/a	major	Contig	full		189x			GCA_000825745.1	GCF_000825745.1	yes
NZ_CDFS01000291.1	222	100	100		PAE221	Pseudomonas aeruginosa (g-proteobacteria)	strain=Pae221_ST274	287	SAMEA2795755	PRJEB7414	ERA7	2014-12-1	n/a	major	Contig	full		189x			GCA_000825745.1	GCF_000825745.1	yes
NZ_CDFS01000292.1	222	100	100		PAE221	Pseudomonas aeruginosa (g-proteobacteria)	strain=Pae221_ST274	287	SAMEA2795755	PRJEB7414	ERA7	2014-12-1	n/a	major	Contig	full		189x			GCA_000825745.1	GCF_000825745.1	yes
NZ_CDFS01000295.1	233	99.15	100		PAE221	Pseudomonas aeruginosa (g-proteobacteria)	strain=Pae221_ST274	287	SAMEA2795755	PRJEB7414	ERA7	2014-12-1	n/a	major	Contig	full		189x			GCA_000825745.1	GCF_000825745.1	yes
NZ_CDFS01000297.1	234	100	100		PAE221	Pseudomonas aeruginosa (g-proteobacteria)	strain=Pae221_ST274	287	SAMEA2795755	PRJEB7414	ERA7	2014-12-1	n/a	major	Contig	full		189x			GCA_000825745.1	GCF_000825745.1	yes
NZ_CDFS01000298.1	210	99.52	100		PAE221	Pseudomonas aeruginosa (g-proteobacteria)	strain=Pae221_ST274	287	SAMEA2795755	PRJEB7414	ERA7	2014-12-1	n/a	major	Contig	full		189x			GCA_000825745.1	GCF_000825745.1	yes
NZ_CDFS01000300.1	210	100	100		PAE221	Pseudomonas aeruginosa (g-proteobacteria)	strain=Pae221_ST274	287	SAMEA2795755	PRJEB7414	ERA7	2014-12-1	n/a	major	Contig	full		189x			GCA_000825745.1	GCF_000825745.1	yes
NZ_CDFS01000301.1	234	99.15	100		PAE221	Pseudomonas aeruginosa (g-proteobacteria)	strain=Pae221_ST274	287	SAMEA2795755	PRJEB7414	ERA7	2014-12-1	n/a	major	Contig	full		189x			GCA_000825745.1	GCF_000825745.1	yes
NZ_CDFS01000302.1	210	98.08	99.05		PAE221	Pseudomonas aeruginosa (g-proteobacteria)	strain=Pae221_ST274	287	SAMEA2795755	PRJEB7414	ERA7	2014-12-1	n/a	major	Contig	full		189x			GCA_000825745.1	GCF_000825745.1	yes
NZ_CDFS01000303.1	209	100	100		PAE221	Pseudomonas aeruginosa (g-proteobacteria)	strain=Pae221_ST274	287	SAMEA2795755	PRJEB7414	ERA7	2014-12-1	n/a	major	Contig	full		189x			GCA_000825745.1	GCF_000825745.1	yes
NZ_CDFS01000304.1	232	96.12	100		PAE221	Pseudomonas aeruginosa (g-proteobacteria)	strain=Pae221_ST274	287	SAMEA2795755	PRJEB7414	ERA7	2014-12-1	n/a	major	Contig	full		189x			GCA_000825745.1	GCF_000825745.1	yes
NZ_CDFS01000307.1	232	99.14	100		PAE221	Pseudomonas aeruginosa (g-proteobacteria)	strain=Pae221_ST274	287	SAMEA2795755	PRJEB7414	ERA7	2014-12-1	n/a	major	Contig	full		189x			GCA_000825745.1	GCF_000825745.1	yes
NZ_CDFS01000308.1	210	100	100		PAE221	Pseudomonas aeruginosa (g-proteobacteria)	strain=Pae221_ST274	287	SAMEA2795755	PRJEB7414	ERA7	2014-12-1	n/a	major	Contig	full		189x			GCA_000825745.1	GCF_000825745.1	yes
NZ_CDFS01000309.1	232	99.57	100		PAE221	Pseudomonas aeruginosa (g-proteobacteria)	strain=Pae221_ST274	287	SAMEA2795755	PRJEB7414	ERA7	2014-12-1	n/a	major	Contig	full		189x			GCA_000825745.1	GCF_000825745.1	yes
NZ_CDFS01000310.1	211	99.53	100		PAE221	Pseudomonas aeruginosa (g-proteobacteria)	strain=Pae221_ST274	287	SAMEA2795755	PRJEB7414	ERA7	2014-12-1	n/a	major	Contig	full		189x			GCA_000825745.1	GCF_000825745.1	yes
NZ_CDFS01000311.1	232	100	100		PAE221	Pseudomonas aeruginosa (g-proteobacteria)	strain=Pae221_ST274	287	SAMEA2795755	PRJEB7414	ERA7	2014-12-1	n/a	major	Contig	full		189x			GCA_000825745.1	GCF_000825745.1	yes
NZ_CDFS01000312.1	211	100	100		PAE221	Pseudomonas aeruginosa (g-proteobacteria)	strain=Pae221_ST274	287	SAMEA2795755	PRJEB7414	ERA7	2014-12-1	n/a	major	Contig	full		189x			GCA_000825745.1	GCF_000825745.1	yes
NZ_CDFS01000313.1	231	100	100		PAE221	Pseudomonas aeruginosa (g-proteobacteria)	strain=Pae221_ST274	287	SAMEA2795755	PRJEB7414	ERA7	2014-12-1	n/a	major	Contig	full		189x			GCA_000825745.1	GCF_000825745.1	yes
NZ_CDFS01000314.1	208	100	100		PAE221	Pseudomonas aeruginosa (g-proteobacteria)	strain=Pae221_ST274	287	SAMEA2795755	PRJEB7414	ERA7	2014-12-1	n/a	major	Contig	full		189x			GCA_000825745.1	GCF_000825745.1	yes
NZ_CDFS01000315.1	230	100	100		PAE221	Pseudomonas aeruginosa (g-proteobacteria)	strain=Pae221_ST274	287	SAMEA2795755	PRJEB7414	ERA7	2014-12-1	n/a	major	Contig	full		189x			GCA_000825745.1	GCF_000825745.1	yes
NZ_CDFS01000316.1	207	100	100		PAE221	Pseudomonas aeruginosa (g-proteobacteria)	strain=Pae221_ST274	287	SAMEA2795755	PRJEB7414	ERA7	2014-12-1	n/a	major	Contig	full		189x			GCA_000825745.1	GCF_000825745.1	yes
NZ_CDFS01000317.1	230	99.57	100		PAE221	Pseudomonas aeruginosa (g-proteobacteria)	strain=Pae221_ST274	287	SAMEA2795755	PRJEB7414	ERA7	2014-12-1	n/a	major	Contig	full		189x			GCA_000825745.1	GCF_000825745.1	yes
NZ_CDFS01000319.1	230	100	100		PAE221	Pseudomonas aeruginosa (g-proteobacteria)	strain=Pae221_ST274	287	SAMEA2795755	PRJEB7414	ERA7	2014-12-1	n/a	major	Contig	full		189x			GCA_000825745.1	GCF_000825745.1	yes
NZ_CDFS01000321.1	207	100	100		PAE221	Pseudomonas aeruginosa (g-proteobacteria)	strain=Pae221_ST274	287	SAMEA2795755	PRJEB7414	ERA7	2014-12-1	n/a	major	Contig	full		189x			GCA_000825745.1	GCF_000825745.1	yes
NZ_CDFS01000322.1	231	98.27	100		PAE221	Pseudomonas aeruginosa (g-proteobacteria)	strain=Pae221_ST274	287	SAMEA2795755	PRJEB7414	ERA7	2014-12-1	n/a	major	Contig	full		189x			GCA_000825745.1	GCF_000825745.1	yes
NZ_CDFS01000323.1	231	100	100		PAE221	Pseudomonas aeruginosa (g-proteobacteria)	strain=Pae221_ST274	287	SAMEA2795755	PRJEB7414	ERA7	2014-12-1	n/a	major	Contig	full		189x			GCA_000825745.1	GCF_000825745.1	yes
NZ_CDFS01000324.1	209	97.61	100		PAE221	Pseudomonas aeruginosa (g-proteobacteria)	strain=Pae221_ST274	287	SAMEA2795755	PRJEB7414	ERA7	2014-12-1	n/a	major	Contig	full		189x			GCA_000825745.1	GCF_000825745.1	yes
NZ_CDFS01000326.1	208	100	100		PAE221	Pseudomonas aeruginosa (g-proteobacteria)	strain=Pae221_ST274	287	SAMEA2795755	PRJEB7414	ERA7	2014-12-1	n/a	major	Contig	full		189x			GCA_000825745.1	GCF_000825745.1	yes
NZ_CDFS01000329.1	229	100	100		PAE221	Pseudomonas aeruginosa (g-proteobacteria)	strain=Pae221_ST274	287	SAMEA2795755	PRJEB7414	ERA7	2014-12-1	n/a	major	Contig	full		189x			GCA_000825745.1	GCF_000825745.1	yes
NZ_CDFS01000331.1	229	99.13	100		PAE221	Pseudomonas aeruginosa (g-proteobacteria)	strain=Pae221_ST274	287	SAMEA2795755	PRJEB7414	ERA7	2014-12-1	n/a	major	Contig	full		189x			GCA_000825745.1	GCF_000825745.1	yes
NZ_CDFS01000332.1	208	99.52	100		PAE221	Pseudomonas aeruginosa (g-proteobacteria)	strain=Pae221_ST274	287	SAMEA2795755	PRJEB7414	ERA7	2014-12-1	n/a	major	Contig	full		189x			GCA_000825745.1	GCF_000825745.1	yes
NZ_CDFS01000333.1	206	100	100		PAE221	Pseudomonas aeruginosa (g-proteobacteria)	strain=Pae221_ST274	287	SAMEA2795755	PRJEB7414	ERA7	2014-12-1	n/a	major	Contig	full		189x			GCA_000825745.1	GCF_000825745.1	yes
NZ_CDFS01000334.1	239	100	100		PAE221	Pseudomonas aeruginosa (g-proteobacteria)	strain=Pae221_ST274	287	SAMEA2795755	PRJEB7414	ERA7	2014-12-1	n/a	major	Contig	full		189x			GCA_000825745.1	GCF_000825745.1	yes
NZ_CDFS01000335.1	206	99.51	100		PAE221	Pseudomonas aeruginosa (g-proteobacteria)	strain=Pae221_ST274	287	SAMEA2795755	PRJEB7414	ERA7	2014-12-1	n/a	major	Contig	full		189x			GCA_000825745.1	GCF_000825745.1	yes
NZ_CDFS01000336.1	206	100	100		PAE221	Pseudomonas aeruginosa (g-proteobacteria)	strain=Pae221_ST274	287	SAMEA2795755	PRJEB7414	ERA7	2014-12-1	n/a	major	Contig	full		189x			GCA_000825745.1	GCF_000825745.1	yes
NZ_CDFS01000337.1	206	100	100	WP_079396160.1	PAE221	Pseudomonas aeruginosa (g-proteobacteria)	strain=Pae221_ST274	287	SAMEA2795755	PRJEB7414	ERA7	2014-12-1	n/a	major	Contig	full		189x			GCA_000825745.1	GCF_000825745.1	yes
NZ_CDFS01000340.1	237	100	100		PAE221	Pseudomonas aeruginosa (g-proteobacteria)	strain=Pae221_ST274	287	SAMEA2795755	PRJEB7414	ERA7	2014-12-1	n/a	major	Contig	full		189x			GCA_000825745.1	GCF_000825745.1	yes
NZ_CDFS01000341.1	206	100	100		PAE221	Pseudomonas aeruginosa (g-proteobacteria)	strain=Pae221_ST274	287	SAMEA2795755	PRJEB7414	ERA7	2014-12-1	n/a	major	Contig	full		189x			GCA_000825745.1	GCF_000825745.1	yes
NZ_CDFS01000344.1	238	98.72	98.74		PAE221	Pseudomonas aeruginosa (g-proteobacteria)	strain=Pae221_ST274	287	SAMEA2795755	PRJEB7414	ERA7	2014-12-1	n/a	major	Contig	full		189x			GCA_000825745.1	GCF_000825745.1	yes
NZ_CDFS01000345.1	206	100	100		PAE221	Pseudomonas aeruginosa (g-proteobacteria)	strain=Pae221_ST274	287	SAMEA2795755	PRJEB7414	ERA7	2014-12-1	n/a	major	Contig	full		189x			GCA_000825745.1	GCF_000825745.1	yes
NZ_CDFS01000347.1	207	100	100		PAE221	Pseudomonas aeruginosa (g-proteobacteria)	strain=Pae221_ST274	287	SAMEA2795755	PRJEB7414	ERA7	2014-12-1	n/a	major	Contig	full		189x			GCA_000825745.1	GCF_000825745.1	yes
NZ_CDFS01000348.1	207	100	100		PAE221	Pseudomonas aeruginosa (g-proteobacteria)	strain=Pae221_ST274	287	SAMEA2795755	PRJEB7414	ERA7	2014-12-1	n/a	major	Contig	full		189x			GCA_000825745.1	GCF_000825745.1	yes
NZ_CDFS01000349.1	237	100	100		PAE221	Pseudomonas aeruginosa (g-proteobacteria)	strain=Pae221_ST274	287	SAMEA2795755	PRJEB7414	ERA7	2014-12-1	n/a	major	Contig	full		189x			GCA_000825745.1	GCF_000825745.1	yes
NZ_CDFS01000350.1	236	100	100		PAE221	Pseudomonas aeruginosa (g-proteobacteria)	strain=Pae221_ST274	287	SAMEA2795755	PRJEB7414	ERA7	2014-12-1	n/a	major	Contig	full		189x			GCA_000825745.1	GCF_000825745.1	yes
NZ_CDFS01000353.1	235	100	100		PAE221	Pseudomonas aeruginosa (g-proteobacteria)	strain=Pae221_ST274	287	SAMEA2795755	PRJEB7414	ERA7	2014-12-1	n/a	major	Contig	full		189x			GCA_000825745.1	GCF_000825745.1	yes
NZ_CDFS01000355.1	235	100	100		PAE221	Pseudomonas aeruginosa (g-proteobacteria)	strain=Pae221_ST274	287	SAMEA2795755	PRJEB7414	ERA7	2014-12-1	n/a	major	Contig	full		189x			GCA_000825745.1	GCF_000825745.1	yes
NZ_CDFS01000357.1	235	100	100		PAE221	Pseudomonas aeruginosa (g-proteobacteria)	strain=Pae221_ST274	287	SAMEA2795755	PRJEB7414	ERA7	2014-12-1	n/a	major	Contig	full		189x			GCA_000825745.1	GCF_000825745.1	yes
NZ_CDFS01000358.1	235	99.57	100		PAE221	Pseudomonas aeruginosa (g-proteobacteria)	strain=Pae221_ST274	287	SAMEA2795755	PRJEB7414	ERA7	2014-12-1	n/a	major	Contig	full		189x			GCA_000825745.1	GCF_000825745.1	yes
NZ_CDFS01000360.1	235	100	100		PAE221	Pseudomonas aeruginosa (g-proteobacteria)	strain=Pae221_ST274	287	SAMEA2795755	PRJEB7414	ERA7	2014-12-1	n/a	major	Contig	full		189x			GCA_000825745.1	GCF_000825745.1	yes
NZ_CDFS01000361.1	182	100	100		PAE221	Pseudomonas aeruginosa (g-proteobacteria)	strain=Pae221_ST274	287	SAMEA2795755	PRJEB7414	ERA7	2014-12-1	n/a	major	Contig	full		189x			GCA_000825745.1	GCF_000825745.1	yes
NZ_CDFS01000362.1	235	99.57	100		PAE221	Pseudomonas aeruginosa (g-proteobacteria)	strain=Pae221_ST274	287	SAMEA2795755	PRJEB7414	ERA7	2014-12-1	n/a	major	Contig	full		189x			GCA_000825745.1	GCF_000825745.1	yes
NZ_CDFS01000364.1	234	100	100		PAE221	Pseudomonas aeruginosa (g-proteobacteria)	strain=Pae221_ST274	287	SAMEA2795755	PRJEB7414	ERA7	2014-12-1	n/a	major	Contig	full		189x			GCA_000825745.1	GCF_000825745.1	yes
NZ_CDFS01000366.1	234	100	100		PAE221	Pseudomonas aeruginosa (g-proteobacteria)	strain=Pae221_ST274	287	SAMEA2795755	PRJEB7414	ERA7	2014-12-1	n/a	major	Contig	full		189x			GCA_000825745.1	GCF_000825745.1	yes
NZ_CDFS01000367.1	234	100	100		PAE221	Pseudomonas aeruginosa (g-proteobacteria)	strain=Pae221_ST274	287	SAMEA2795755	PRJEB7414	ERA7	2014-12-1	n/a	major	Contig	full		189x			GCA_000825745.1	GCF_000825745.1	yes
NZ_CDFS01000368.1	206	99.51	100		PAE221	Pseudomonas aeruginosa (g-proteobacteria)	strain=Pae221_ST274	287	SAMEA2795755	PRJEB7414	ERA7	2014-12-1	n/a	major	Contig	full		189x			GCA_000825745.1	GCF_000825745.1	yes
NZ_CDFS01000369.1	206	100	100		PAE221	Pseudomonas aeruginosa (g-proteobacteria)	strain=Pae221_ST274	287	SAMEA2795755	PRJEB7414	ERA7	2014-12-1	n/a	major	Contig	full		189x			GCA_000825745.1	GCF_000825745.1	yes
NZ_CDFS01000370.1	206	99.02	99.51		PAE221	Pseudomonas aeruginosa (g-proteobacteria)	strain=Pae221_ST274	287	SAMEA2795755	PRJEB7414	ERA7	2014-12-1	n/a	major	Contig	full		189x			GCA_000825745.1	GCF_000825745.1	yes
NZ_CDLH01000006.1	245	99.59	100		ASM105138v1	Salmonella enterica subsp. enterica serovar Typhi (enterobacteria)	strain=H58	90370	SAMEA3110714	PRJEB7681	HPA	2014-12-9	n/a	major	Contig	full					GCA_001051385.1	GCF_001051385.1	yes
NZ_CDLH01000008.1	237	99.58	100		ASM105138v1	Salmonella enterica subsp. enterica serovar Typhi (enterobacteria)	strain=H58	90370	SAMEA3110714	PRJEB7681	HPA	2014-12-9	n/a	major	Contig	full					GCA_001051385.1	GCF_001051385.1	yes
NZ_CDLH01000009.1	246	99.59	100		ASM105138v1	Salmonella enterica subsp. enterica serovar Typhi (enterobacteria)	strain=H58	90370	SAMEA3110714	PRJEB7681	HPA	2014-12-9	n/a	major	Contig	full					GCA_001051385.1	GCF_001051385.1	yes
NZ_CDLH01000012.1	239	99.58	100		ASM105138v1	Salmonella enterica subsp. enterica serovar Typhi (enterobacteria)	strain=H58	90370	SAMEA3110714	PRJEB7681	HPA	2014-12-9	n/a	major	Contig	full					GCA_001051385.1	GCF_001051385.1	yes
NZ_CDLH01000014.1	248	100	100		ASM105138v1	Salmonella enterica subsp. enterica serovar Typhi (enterobacteria)	strain=H58	90370	SAMEA3110714	PRJEB7681	HPA	2014-12-9	n/a	major	Contig	full					GCA_001051385.1	GCF_001051385.1	yes
NZ_CDLH01000016.1	245	100	100		ASM105138v1	Salmonella enterica subsp. enterica serovar Typhi (enterobacteria)	strain=H58	90370	SAMEA3110714	PRJEB7681	HPA	2014-12-9	n/a	major	Contig	full					GCA_001051385.1	GCF_001051385.1	yes
NZ_CDLH01000029.1	270	99.26	100		ASM105138v1	Salmonella enterica subsp. enterica serovar Typhi (enterobacteria)	strain=H58	90370	SAMEA3110714	PRJEB7681	HPA	2014-12-9	n/a	major	Contig	full					GCA_001051385.1	GCF_001051385.1	yes
NZ_CDLH01000031.1	241	99.59	100		ASM105138v1	Salmonella enterica subsp. enterica serovar Typhi (enterobacteria)	strain=H58	90370	SAMEA3110714	PRJEB7681	HPA	2014-12-9	n/a	major	Contig	full					GCA_001051385.1	GCF_001051385.1	yes
NZ_CDLH01000047.1	235	99.57	100		ASM105138v1	Salmonella enterica subsp. enterica serovar Typhi (enterobacteria)	strain=H58	90370	SAMEA3110714	PRJEB7681	HPA	2014-12-9	n/a	major	Contig	full					GCA_001051385.1	GCF_001051385.1	yes
NZ_CDLH01000048.1	272	100	100		ASM105138v1	Salmonella enterica subsp. enterica serovar Typhi (enterobacteria)	strain=H58	90370	SAMEA3110714	PRJEB7681	HPA	2014-12-9	n/a	major	Contig	full					GCA_001051385.1	GCF_001051385.1	yes
NZ_CDLH01000052.1	253	100	100		ASM105138v1	Salmonella enterica subsp. enterica serovar Typhi (enterobacteria)	strain=H58	90370	SAMEA3110714	PRJEB7681	HPA	2014-12-9	n/a	major	Contig	full					GCA_001051385.1	GCF_001051385.1	yes
NZ_CDLH01000059.1	255	100	100		ASM105138v1	Salmonella enterica subsp. enterica serovar Typhi (enterobacteria)	strain=H58	90370	SAMEA3110714	PRJEB7681	HPA	2014-12-9	n/a	major	Contig	full					GCA_001051385.1	GCF_001051385.1	yes
NZ_CDLH01000066.1	237	99.58	100		ASM105138v1	Salmonella enterica subsp. enterica serovar Typhi (enterobacteria)	strain=H58	90370	SAMEA3110714	PRJEB7681	HPA	2014-12-9	n/a	major	Contig	full					GCA_001051385.1	GCF_001051385.1	yes
NZ_CDLH01000068.1	235	99.15	100		ASM105138v1	Salmonella enterica subsp. enterica serovar Typhi (enterobacteria)	strain=H58	90370	SAMEA3110714	PRJEB7681	HPA	2014-12-9	n/a	major	Contig	full					GCA_001051385.1	GCF_001051385.1	yes
NZ_CDLI01000013.1	235	99.15	100		H125160566_illumina_only.fasta	Salmonella enterica subsp. enterica serovar Typhi (enterobacteria)	strain=H58	90370	SAMEA3110714	PRJEB7681	HPA	2014-12-9	n/a	major	Contig	full		35x			GCA_000944835.1	GCF_000944835.1	yes
NZ_CDLI01000015.1	237	99.58	100		H125160566_illumina_only.fasta	Salmonella enterica subsp. enterica serovar Typhi (enterobacteria)	strain=H58	90370	SAMEA3110714	PRJEB7681	HPA	2014-12-9	n/a	major	Contig	full		35x			GCA_000944835.1	GCF_000944835.1	yes
NZ_CDLI01000019.1	270	99.26	100		H125160566_illumina_only.fasta	Salmonella enterica subsp. enterica serovar Typhi (enterobacteria)	strain=H58	90370	SAMEA3110714	PRJEB7681	HPA	2014-12-9	n/a	major	Contig	full		35x			GCA_000944835.1	GCF_000944835.1	yes
NZ_CDLI01000031.1	255	100	100		H125160566_illumina_only.fasta	Salmonella enterica subsp. enterica serovar Typhi (enterobacteria)	strain=H58	90370	SAMEA3110714	PRJEB7681	HPA	2014-12-9	n/a	major	Contig	full		35x			GCA_000944835.1	GCF_000944835.1	yes
NZ_CDLI01000034.1	253	100	100		H125160566_illumina_only.fasta	Salmonella enterica subsp. enterica serovar Typhi (enterobacteria)	strain=H58	90370	SAMEA3110714	PRJEB7681	HPA	2014-12-9	n/a	major	Contig	full		35x			GCA_000944835.1	GCF_000944835.1	yes
NZ_CDLI01000038.1	246	99.59	100		H125160566_illumina_only.fasta	Salmonella enterica subsp. enterica serovar Typhi (enterobacteria)	strain=H58	90370	SAMEA3110714	PRJEB7681	HPA	2014-12-9	n/a	major	Contig	full		35x			GCA_000944835.1	GCF_000944835.1	yes
NZ_CDLI01000039.1	241	99.59	100		H125160566_illumina_only.fasta	Salmonella enterica subsp. enterica serovar Typhi (enterobacteria)	strain=H58	90370	SAMEA3110714	PRJEB7681	HPA	2014-12-9	n/a	major	Contig	full		35x			GCA_000944835.1	GCF_000944835.1	yes
NZ_CDLI01000044.1	248	100	100		H125160566_illumina_only.fasta	Salmonella enterica subsp. enterica serovar Typhi (enterobacteria)	strain=H58	90370	SAMEA3110714	PRJEB7681	HPA	2014-12-9	n/a	major	Contig	full		35x			GCA_000944835.1	GCF_000944835.1	yes
NZ_CDLI01000056.1	245	99.59	100		H125160566_illumina_only.fasta	Salmonella enterica subsp. enterica serovar Typhi (enterobacteria)	strain=H58	90370	SAMEA3110714	PRJEB7681	HPA	2014-12-9	n/a	major	Contig	full		35x			GCA_000944835.1	GCF_000944835.1	yes
NZ_CDLI01000066.1	235	99.57	100		H125160566_illumina_only.fasta	Salmonella enterica subsp. enterica serovar Typhi (enterobacteria)	strain=H58	90370	SAMEA3110714	PRJEB7681	HPA	2014-12-9	n/a	major	Contig	full		35x			GCA_000944835.1	GCF_000944835.1	yes
NZ_CDLI01000084.1	272	100	100		H125160566_illumina_only.fasta	Salmonella enterica subsp. enterica serovar Typhi (enterobacteria)	strain=H58	90370	SAMEA3110714	PRJEB7681	HPA	2014-12-9	n/a	major	Contig	full		35x			GCA_000944835.1	GCF_000944835.1	yes
NZ_CDLI01000115.1	245	100	100		H125160566_illumina_only.fasta	Salmonella enterica subsp. enterica serovar Typhi (enterobacteria)	strain=H58	90370	SAMEA3110714	PRJEB7681	HPA	2014-12-9	n/a	major	Contig	full		35x			GCA_000944835.1	GCF_000944835.1	yes
NZ_CDLI01000117.1	237	99.58	100		H125160566_illumina_only.fasta	Salmonella enterica subsp. enterica serovar Typhi (enterobacteria)	strain=H58	90370	SAMEA3110714	PRJEB7681	HPA	2014-12-9	n/a	major	Contig	full		35x			GCA_000944835.1	GCF_000944835.1	yes
NZ_CDLI01000128.1	239	99.58	100		H125160566_illumina_only.fasta	Salmonella enterica subsp. enterica serovar Typhi (enterobacteria)	strain=H58	90370	SAMEA3110714	PRJEB7681	HPA	2014-12-9	n/a	major	Contig	full		35x			GCA_000944835.1	GCF_000944835.1	yes
NZ_CDSE01000078.1	717	99.86	100	WP_082423252.1	Paenibacillus dakarensis FF9	Paenibacillus sp. FF9 (firmicutes)	strain=FF9	1527293	SAMEA3246153	PRJEB8435	URMITE	2015-4-9	n/a	major	Contig	full		65x			GCA_001373415.1	GCF_001373415.1	yes
NZ_CEYG01000039.1	1735	99.37	100	WP_072056632.1	10561_2#3	Salmonella enterica subsp. enterica serovar Typhi (enterobacteria)	strain=np94	90370	SAMEA2145334	PRJEB3215	SC	2015-3-19	n/a	major	Scaffold	full		100x			GCA_001363235.1	GCF_001363235.1	yes
NZ_CEYG01000041.1	1531	95.45	99.41		10561_2#3	Salmonella enterica subsp. enterica serovar Typhi (enterobacteria)	strain=np94	90370	SAMEA2145334	PRJEB3215	SC	2015-3-19	n/a	major	Scaffold	full		100x			GCA_001363235.1	GCF_001363235.1	yes
NZ_CGUB01000053.1	1732	99.42	99.88	WP_072082888.1	10561_2#10	Salmonella enterica subsp. enterica serovar Typhi (enterobacteria)	strain=np95	90370	SAMEA2162457	PRJEB3215	SC	2015-7-24	n/a	major	Scaffold	full		100x			GCA_001368195.1	GCF_001368195.1	yes
NZ_CGZQ01000061.1	1921	100	100	WP_050389090.1	6983_4#74	Streptococcus pneumoniae (firmicutes)	strain=SMRU2282	1313	SAMEA1025844	PRJEB2397	SC	2015-7-24	n/a	major	Scaffold	full		100x			GCA_001343555.1	GCF_001343555.1	yes
NZ_CGZQ01000097.1	688	100	100		6983_4#74	Streptococcus pneumoniae (firmicutes)	strain=SMRU2282	1313	SAMEA1025844	PRJEB2397	SC	2015-7-24	n/a	major	Scaffold	full		100x			GCA_001343555.1	GCF_001343555.1	yes
NZ_CGZQ01000111.1	446	100	100		6983_4#74	Streptococcus pneumoniae (firmicutes)	strain=SMRU2282	1313	SAMEA1025844	PRJEB2397	SC	2015-7-24	n/a	major	Scaffold	full		100x			GCA_001343555.1	GCF_001343555.1	yes
NZ_CGZQ01000120.1	370	100	100		6983_4#74	Streptococcus pneumoniae (firmicutes)	strain=SMRU2282	1313	SAMEA1025844	PRJEB2397	SC	2015-7-24	n/a	major	Scaffold	full		100x			GCA_001343555.1	GCF_001343555.1	yes
NZ_CGZQ01000121.1	370	100	100		6983_4#74	Streptococcus pneumoniae (firmicutes)	strain=SMRU2282	1313	SAMEA1025844	PRJEB2397	SC	2015-7-24	n/a	major	Scaffold	full		100x			GCA_001343555.1	GCF_001343555.1	yes
NZ_CGZQ01000124.1	322	100	99.69		6983_4#74	Streptococcus pneumoniae (firmicutes)	strain=SMRU2282	1313	SAMEA1025844	PRJEB2397	SC	2015-7-24	n/a	major	Scaffold	full		100x			GCA_001343555.1	GCF_001343555.1	yes
NZ_CGZQ01000134.1	373	100	99.46		6983_4#74	Streptococcus pneumoniae (firmicutes)	strain=SMRU2282	1313	SAMEA1025844	PRJEB2397	SC	2015-7-24	n/a	major	Scaffold	full		100x			GCA_001343555.1	GCF_001343555.1	yes
NZ_CGZQ01000141.1	317	100	100		6983_4#74	Streptococcus pneumoniae (firmicutes)	strain=SMRU2282	1313	SAMEA1025844	PRJEB2397	SC	2015-7-24	n/a	major	Scaffold	full		100x			GCA_001343555.1	GCF_001343555.1	yes
NZ_CJEY01000039.1	3992	95.86	93.46		10561_2#1	Salmonella enterica subsp. enterica serovar Typhi (enterobacteria)	strain=np4	90370	SAMEA2162164	PRJEB3215	SC	2015-7-10	n/a	major	Scaffold	full		100x			GCA_001134345.1	GCF_001134345.1	yes
NZ_CJEY01000043.1	1741	99.37	99.94	WP_072056632.1	10561_2#1	Salmonella enterica subsp. enterica serovar Typhi (enterobacteria)	strain=np4	90370	SAMEA2162164	PRJEB3215	SC	2015-7-10	n/a	major	Scaffold	full		100x			GCA_001134345.1	GCF_001134345.1	yes
NZ_CJEZ01000051.1	1732	99.36	99.94	WP_072056632.1	10561_2#12	Salmonella enterica subsp. enterica serovar Typhi (enterobacteria)	strain=np8	90370	SAMEA2144076	PRJEB3215	SC	2015-7-10	n/a	major	Scaffold	full		100x			GCA_001125245.1	GCF_001125245.1	yes
NZ_CJFD01000049.1	1730	99.36	99.94	WP_072056632.1	10561_2#2	Salmonella enterica subsp. enterica serovar Typhi (enterobacteria)	strain=np41	90370	SAMEA2154270	PRJEB3215	SC	2015-7-10	n/a	major	Scaffold	full		100x			GCA_001083745.1	GCF_001083745.1	yes
NZ_CJFD01000050.1	1695	95.48	96.52		10561_2#2	Salmonella enterica subsp. enterica serovar Typhi (enterobacteria)	strain=np41	90370	SAMEA2154270	PRJEB3215	SC	2015-7-10	n/a	major	Scaffold	full		100x			GCA_001083745.1	GCF_001083745.1	yes
NZ_CJGE01000042.1	1698	99.35	100	WP_072082888.1	10561_2#6	Salmonella enterica subsp. enterica serovar Typhi (enterobacteria)	strain=ERL113717	90370	SAMEA2145865	PRJEB3215	SC	2015-7-10	n/a	major	Contig	full		100x			GCA_001125085.1	GCF_001125085.1	yes
NZ_CJGE01000043.1	1561	95.51	97.5		10561_2#6	Salmonella enterica subsp. enterica serovar Typhi (enterobacteria)	strain=ERL113717	90370	SAMEA2145865	PRJEB3215	SC	2015-7-10	n/a	major	Contig	full		100x			GCA_001125085.1	GCF_001125085.1	yes
NZ_CKYY01000077.1	392	100	100		6840_1#21	Streptococcus pneumoniae (firmicutes)	strain=SMRU1773	1313	SAMEA1025922	PRJEB2397	SC	2015-7-13	n/a	major	Scaffold	full		100x			GCA_001110885.1	GCF_001110885.1	yes
NZ_CKYY01000079.1	328	100	100		6840_1#21	Streptococcus pneumoniae (firmicutes)	strain=SMRU1773	1313	SAMEA1025922	PRJEB2397	SC	2015-7-13	n/a	major	Scaffold	full		100x			GCA_001110885.1	GCF_001110885.1	yes
NZ_CKYY01000080.1	313	100	100		6840_1#21	Streptococcus pneumoniae (firmicutes)	strain=SMRU1773	1313	SAMEA1025922	PRJEB2397	SC	2015-7-13	n/a	major	Scaffold	full		100x			GCA_001110885.1	GCF_001110885.1	yes
NZ_CMHF01000101.1	353	100	100		7038_5#15	Streptococcus pneumoniae (firmicutes)	strain=SMRU2967	1313	SAMEA1029322	PRJEB2480	SC	2015-7-14	n/a	major	Scaffold	full		100x			GCA_001116085.1	GCF_001116085.1	yes
NZ_CMKS01000069.1	1556	100	100	WP_072056632.1	7054_4#6	Streptococcus pneumoniae (firmicutes)	strain=SMRU3030	1313	SAMEA1029436	PRJEB2480	SC	2015-7-14	n/a	major	Scaffold	full		100x			GCA_001171765.1	GCF_001171765.1	yes
NZ_CMKS01000074.1	1068	99.81	100		7054_4#6	Streptococcus pneumoniae (firmicutes)	strain=SMRU3030	1313	SAMEA1029436	PRJEB2480	SC	2015-7-14	n/a	major	Scaffold	full		100x			GCA_001171765.1	GCF_001171765.1	yes
NZ_CMKS01000077.1	1219	100	100		7054_4#6	Streptococcus pneumoniae (firmicutes)	strain=SMRU3030	1313	SAMEA1029436	PRJEB2480	SC	2015-7-14	n/a	major	Scaffold	full		100x			GCA_001171765.1	GCF_001171765.1	yes
NZ_CMKS01000082.1	1098	100	100		7054_4#6	Streptococcus pneumoniae (firmicutes)	strain=SMRU3030	1313	SAMEA1029436	PRJEB2480	SC	2015-7-14	n/a	major	Scaffold	full		100x			GCA_001171765.1	GCF_001171765.1	yes
NZ_CMKS01000095.1	694	100	100		7054_4#6	Streptococcus pneumoniae (firmicutes)	strain=SMRU3030	1313	SAMEA1029436	PRJEB2480	SC	2015-7-14	n/a	major	Scaffold	full		100x			GCA_001171765.1	GCF_001171765.1	yes
NZ_CMKS01000106.1	505	99.8	100		7054_4#6	Streptococcus pneumoniae (firmicutes)	strain=SMRU3030	1313	SAMEA1029436	PRJEB2480	SC	2015-7-14	n/a	major	Scaffold	full		100x			GCA_001171765.1	GCF_001171765.1	yes
NZ_CMKS01000108.1	391	97.04	100		7054_4#6	Streptococcus pneumoniae (firmicutes)	strain=SMRU3030	1313	SAMEA1029436	PRJEB2480	SC	2015-7-14	n/a	major	Scaffold	full		100x			GCA_001171765.1	GCF_001171765.1	yes
NZ_CMKS01000109.1	498	99.6	100	WP_050389110.1	7054_4#6	Streptococcus pneumoniae (firmicutes)	strain=SMRU3030	1313	SAMEA1029436	PRJEB2480	SC	2015-7-14	n/a	major	Scaffold	full		100x			GCA_001171765.1	GCF_001171765.1	yes
NZ_CMKS01000113.1	487	100	100		7054_4#6	Streptococcus pneumoniae (firmicutes)	strain=SMRU3030	1313	SAMEA1029436	PRJEB2480	SC	2015-7-14	n/a	major	Scaffold	full		100x			GCA_001171765.1	GCF_001171765.1	yes
NZ_CMKS01000115.1	460	100	100		7054_4#6	Streptococcus pneumoniae (firmicutes)	strain=SMRU3030	1313	SAMEA1029436	PRJEB2480	SC	2015-7-14	n/a	major	Scaffold	full		100x			GCA_001171765.1	GCF_001171765.1	yes
NZ_CMKS01000126.1	361	100	100		7054_4#6	Streptococcus pneumoniae (firmicutes)	strain=SMRU3030	1313	SAMEA1029436	PRJEB2480	SC	2015-7-14	n/a	major	Scaffold	full		100x			GCA_001171765.1	GCF_001171765.1	yes
NZ_CQSC01000311.1	641	100	100		5227_6#11	Mycobacterium tuberculosis (high GC Gram+)	strain=O00100977	1773	SAMEA1706680	PRJEB2057	SC	2015-7-18	n/a	major	Scaffold	full		100x			GCA_001201895.1	GCF_001201895.1	yes
NZ_CQSC01000320.1	496	99.8	100		5227_6#11	Mycobacterium tuberculosis (high GC Gram+)	strain=O00100977	1773	SAMEA1706680	PRJEB2057	SC	2015-7-18	n/a	major	Scaffold	full		100x			GCA_001201895.1	GCF_001201895.1	yes
NZ_CQSC01000347.1	332	100	100		5227_6#11	Mycobacterium tuberculosis (high GC Gram+)	strain=O00100977	1773	SAMEA1706680	PRJEB2057	SC	2015-7-18	n/a	major	Scaffold	full		100x			GCA_001201895.1	GCF_001201895.1	yes
NZ_CQTE01000330.1	457	100	100	WP_078839796.1	5237_5#6	Mycobacterium tuberculosis (high GC Gram+)	strain=I09800059	1773	SAMEA968077	PRJEB2057	SC	2015-7-18	n/a	major	Scaffold	full		100x			GCA_001205215.1	GCF_001205215.1	yes
NZ_CQTE01000337.1	436	100	100		5237_5#6	Mycobacterium tuberculosis (high GC Gram+)	strain=I09800059	1773	SAMEA968077	PRJEB2057	SC	2015-7-18	n/a	major	Scaffold	full		100x			GCA_001205215.1	GCF_001205215.1	yes
NZ_CQTE01000342.1	416	99.76	100		5237_5#6	Mycobacterium tuberculosis (high GC Gram+)	strain=I09800059	1773	SAMEA968077	PRJEB2057	SC	2015-7-18	n/a	major	Scaffold	full		100x			GCA_001205215.1	GCF_001205215.1	yes
NZ_CSTK01000030.1	134	100	100		5082_8#4	Chlamydia trachomatis (chlamydias)	strain=Swab5	813	SAMEA901487	PRJEB2214	SC	2015-7-22	n/a	major	Scaffold	full		100x			GCA_001213525.1	GCF_001213525.1	yes
NZ_CSTK01000033.1	467	99.79	100		5082_8#4	Chlamydia trachomatis (chlamydias)	strain=Swab5	813	SAMEA901487	PRJEB2214	SC	2015-7-22	n/a	major	Scaffold	full		100x			GCA_001213525.1	GCF_001213525.1	yes
NZ_CUTM01000041.1	1014	100	100		7213_3#3	Campylobacter jejuni (e-proteobacteria)	strain=OXC6546	197	SAMEA1401318	PRJEB2075	SC	2015-8-3	n/a	major	Scaffold	full		124x			GCA_001239045.1	GCF_001239045.1	yes
NZ_CUTM01000052.1	395	100	100	WP_079676496.1	7213_3#3	Campylobacter jejuni (e-proteobacteria)	strain=OXC6546	197	SAMEA1401318	PRJEB2075	SC	2015-8-3	n/a	major	Scaffold	full		124x			GCA_001239045.1	GCF_001239045.1	yes
NZ_CUTM01000054.1	329	100	100		7213_3#3	Campylobacter jejuni (e-proteobacteria)	strain=OXC6546	197	SAMEA1401318	PRJEB2075	SC	2015-8-3	n/a	major	Scaffold	full		124x			GCA_001239045.1	GCF_001239045.1	yes
NZ_CUTM01000056.1	308	100	99.68		7213_3#3	Campylobacter jejuni (e-proteobacteria)	strain=OXC6546	197	SAMEA1401318	PRJEB2075	SC	2015-8-3	n/a	major	Scaffold	full		124x			GCA_001239045.1	GCF_001239045.1	yes
NZ_CUUH01000019.1	1295	99.69	100		7213_3#5	Campylobacter jejuni (e-proteobacteria)	strain=OXC6548	197	SAMEA1401556	PRJEB2075	SC	2015-8-3	n/a	major	Contig	full		131x			GCA_001235985.1	GCF_001235985.1	yes
NZ_CUUH01000022.1	408	100	100		7213_3#5	Campylobacter jejuni (e-proteobacteria)	strain=OXC6548	197	SAMEA1401556	PRJEB2075	SC	2015-8-3	n/a	major	Contig	full		131x			GCA_001235985.1	GCF_001235985.1	yes
NZ_CUUH01000024.1	348	99.71	99.14		7213_3#5	Campylobacter jejuni (e-proteobacteria)	strain=OXC6548	197	SAMEA1401556	PRJEB2075	SC	2015-8-3	n/a	major	Contig	full		131x			GCA_001235985.1	GCF_001235985.1	yes
NZ_CUUH01000027.1	316	99.68	100		7213_3#5	Campylobacter jejuni (e-proteobacteria)	strain=OXC6548	197	SAMEA1401556	PRJEB2075	SC	2015-8-3	n/a	major	Contig	full		131x			GCA_001235985.1	GCF_001235985.1	yes
NZ_CUUH01000028.1	307	100	97.07		7213_3#5	Campylobacter jejuni (e-proteobacteria)	strain=OXC6548	197	SAMEA1401556	PRJEB2075	SC	2015-8-3	n/a	major	Contig	full		131x			GCA_001235985.1	GCF_001235985.1	yes
NZ_CUUQ01000018.1	312	100	100		7213_3#6	Campylobacter jejuni (e-proteobacteria)	strain=OXC6549	197	SAMEA1401582	PRJEB2075	SC	2015-8-3	n/a	major	Contig	full		133x			GCA_001232205.1	GCF_001232205.1	yes
NZ_CVMZ01000038.1	507	99.8	100	WP_087064480.1	ASM90000578v1	Carnobacterium maltaromaticum (firmicutes)	strain=3-18	2751	SAMEA3335284	PRJEB8756	UNIV-LORRAINE	2017-3-12	n/a	major	Contig	full		30x			GCA_900005785.1	GCF_900005785.1	yes
NZ_CVRX01000187.1	230	100	100		Mycobacterium fortuitum ATCC 6841	Mycolicibacterium fortuitum subsp. fortuitum DSM 46621 = ATCC 6841 (high GC Gram+)	strain=ATCC 6841	1214102	SAMEA3444530	PRJEB9497	Centre for Proteomic and Genomic Research	2015-6-30	n/a	major	Scaffold	full		25x			GCA_001050075.1	GCF_001050075.1	yes
NZ_CVTA01000056.1	333	100	100		Mycobacterium komanii GPK 1020	Mycolicibacterium komanii (high GC Gram+)	strain=GPK 1020	1566885	SAMEA3432687	PRJEB9486	Centre for Proteomic and Genomic Research	2015-6-30	n/a	major	Contig	full		23x		Representative Genome	GCA_001050035.1	GCF_001050035.1	yes
NZ_CVWE01000833.1	112	100	100		E5_London_17_VIM_2_12_12	Pseudomonas aeruginosa (g-proteobacteria)	strain=E5_London_17_VIM_2_12_12	287	SAMEA3374635	PRJEB9312	PHE	2015-7-7	n/a	major	Contig	full		6x			GCA_001181325.1	GCF_001181325.1	yes
NZ_CZJT01000023.1	852	95.57	98.12		Pseudoclavibacter helvolus, strain W3	Paeniglutamicibacter antarcticus (high GC Gram+)	strain=W2	494023	SAMEA3490269	PRJEB9950	Universitetsparken 15	2016-2-2	n/a	major	Contig	full		31x		Representative Genome	GCA_900010755.1	GCF_900010755.1	yes
NZ_CZJV02000067.1	799	96.65	97	WP_087813814.1	ASM90001623v2	Psychrobacter cibarius (g-proteobacteria)	strain=W1	282669	SAMEA3489744	PRJEB9944	Universitetsparken 15	2016-4-11	n/a	major	Contig	full		117x		Representative Genome	GCA_900016235.2	GCF_900016235.2	yes
NZ_CZJV02000127.1	764	97.91	100		ASM90001623v2	Psychrobacter cibarius (g-proteobacteria)	strain=W1	282669	SAMEA3489744	PRJEB9944	Universitetsparken 15	2016-4-11	n/a	major	Contig	full		117x		Representative Genome	GCA_900016235.2	GCF_900016235.2	yes
NZ_FACW01000262.1	207	100	100		Peptoclostridium difficile	Clostridioides difficile (firmicutes)		1496	SAMEA3664158	PRJEB11776	UNIVERSITE LAVAL	2016-4-2	n/a	major	Contig	full		30x			GCA_900013215.1	GCF_900013215.1	yes
NZ_FADH01000295.1	101	100	100		Peptoclostridium difficile	Clostridioides difficile (firmicutes)		1496	SAMEA3664172	PRJEB11776	UNIVERSITE LAVAL	2016-4-1	n/a	major	Contig	full		30x			GCA_900012765.1	GCF_900012765.1	yes
NZ_FADH01000331.1	77	100	100		Peptoclostridium difficile	Clostridioides difficile (firmicutes)		1496	SAMEA3664172	PRJEB11776	UNIVERSITE LAVAL	2016-4-1	n/a	major	Contig	full		30x			GCA_900012765.1	GCF_900012765.1	yes
NZ_FAEB01000309.1	109	99.08	100		Peptoclostridium difficile	Clostridioides difficile (firmicutes)		1496	SAMEA3664190	PRJEB11776	UNIVERSITE LAVAL	2016-4-2	n/a	major	Contig	full		30x			GCA_900012875.1	GCF_900012875.1	yes
NZ_FAEI01000181.1	239	100	100		Peptoclostridium difficile	Clostridioides difficile (firmicutes)		1496	SAMEA3664198	PRJEB11776	UNIVERSITE LAVAL	2016-4-2	n/a	major	Contig	full		30x			GCA_900012915.1	GCF_900012915.1	yes
NZ_FAFY01000254.1	127	98.44	100		Peptoclostridium difficile	Clostridioides difficile (firmicutes)		1496	SAMEA3664238	PRJEB11776	UNIVERSITE LAVAL	2016-4-2	n/a	major	Contig	full		30x			GCA_900013685.1	GCF_900013685.1	yes
NZ_FAGN01000123.1	240	100	100		Peptoclostridium difficile	Clostridioides difficile (firmicutes)		1496	SAMEA3664257	PRJEB11776	UNIVERSITE LAVAL	2016-4-1	n/a	major	Contig	full		30x			GCA_900008475.1	GCF_900008475.1	yes
NZ_FAGT01000262.1	145	98.62	100		Peptoclostridium difficile	Clostridioides difficile (firmicutes)		1496	SAMEA3664261	PRJEB11776	UNIVERSITE LAVAL	2016-4-2	n/a	major	Contig	full		30x			GCA_900007655.1	GCF_900007655.1	yes
NZ_FAGT01000738.1	90	100	100		Peptoclostridium difficile	Clostridioides difficile (firmicutes)		1496	SAMEA3664261	PRJEB11776	UNIVERSITE LAVAL	2016-4-2	n/a	major	Contig	full		30x			GCA_900007655.1	GCF_900007655.1	yes
NZ_FAJZ01000193.1	118	100	100		Peptoclostridium difficile	Clostridioides difficile (firmicutes)		1496	SAMEA3664343	PRJEB11776	UNIVERSITE LAVAL	2016-4-2	n/a	major	Contig	full		30x			GCA_900012515.1	GCF_900012515.1	yes
NZ_FAKO01000276.1	167	100	100		Peptoclostridium difficile	Clostridioides difficile (firmicutes)		1496	SAMEA3664358	PRJEB11776	UNIVERSITE LAVAL	2016-4-2	n/a	major	Contig	full		30x			GCA_900007705.1	GCF_900007705.1	yes
NZ_FALE01001049.1	96	100	100		Peptoclostridium difficile	Clostridioides difficile (firmicutes)		1496	SAMEA3664368	PRJEB11776	UNIVERSITE LAVAL	2016-4-2	n/a	major	Contig	full		30x			GCA_900012535.1	GCF_900012535.1	yes
NZ_FALZ01000189.1	266	100	100		Peptoclostridium difficile	Clostridioides difficile (firmicutes)		1496	SAMEA3664396	PRJEB11776	UNIVERSITE LAVAL	2016-4-2	n/a	major	Contig	full		30x			GCA_900014625.1	GCF_900014625.1	yes
NZ_FJOJ01000048.1	398	100	100		CD105KSE5	Clostridioides difficile (firmicutes)	strain=CD105KSE5	1496	SAMEA3297403	PRJEB8702	UNIVERSITY OF WARWICK	2016-5-4	n/a	major	Contig	full		50x			GCA_900073125.1	GCF_900073125.1	yes
NZ_FJQG01000103.1	416	99.76	100		CD105KSE2	Clostridioides difficile (firmicutes)	strain=CD105KSE2	1496	SAMEA3297402	PRJEB8702	UNIVERSITY OF WARWICK	2016-5-4	n/a	major	Contig	full		99x			GCA_900073255.1	GCF_900073255.1	yes
NZ_FJUG01000223.1	446	98.88	100		CD105KSE4	Clostridioides difficile (firmicutes)	strain=CD105KSE4	1496	SAMEA3294009	PRJEB8702	UNIVERSITY OF WARWICK	2016-5-4	n/a	major	Contig	full		52x			GCA_900074645.1	GCF_900074645.1	yes
NZ_FLOW01000056.1	230	100	100		TC-1-1-2	Helicobacter pylori (e-proteobacteria)		210	SAMEA3993946	PRJEB13893	Institute of Medical Microbiology and Hospital Epidemiology	2016-6-15	n/a	major	Contig	full		117x			GCA_900087575.1	GCF_900087575.1	yes
NZ_FLOX01000071.1	230	100	100		TC-1-1-4	Helicobacter pylori (e-proteobacteria)		210	SAMEA3993948	PRJEB13893	Institute of Medical Microbiology and Hospital Epidemiology	2016-6-15	n/a	major	Contig	full		72x			GCA_900087765.1	GCF_900087765.1	yes
NZ_FLOY01000060.1	240	100	100		TC-1-1-6	Helicobacter pylori (e-proteobacteria)		210	SAMEA3993950	PRJEB13893	Institute of Medical Microbiology and Hospital Epidemiology	2016-6-15	n/a	major	Contig	full		111x			GCA_900087595.1	GCF_900087595.1	yes
NZ_FLPY01000064.1	269	100	100		STT-1-1-3-Cm	Helicobacter pylori (e-proteobacteria)		210	SAMEA4000261	PRJEB13893	Institute of Medical Microbiology and Hospital Epidemiology	2016-6-15	n/a	major	Contig	full		200x			GCA_900088185.1	GCF_900088185.1	yes
NZ_FLPY01000065.1	326	99.36	95.4		STT-1-1-3-Cm	Helicobacter pylori (e-proteobacteria)		210	SAMEA4000261	PRJEB13893	Institute of Medical Microbiology and Hospital Epidemiology	2016-6-15	n/a	major	Contig	full		200x			GCA_900088185.1	GCF_900088185.1	yes
NZ_FLPY01000067.1	274	100	100		STT-1-1-3-Cm	Helicobacter pylori (e-proteobacteria)		210	SAMEA4000261	PRJEB13893	Institute of Medical Microbiology and Hospital Epidemiology	2016-6-15	n/a	major	Contig	full		200x			GCA_900088185.1	GCF_900088185.1	yes
NZ_FLPY01000068.1	316	99.37	100		STT-1-1-3-Cm	Helicobacter pylori (e-proteobacteria)		210	SAMEA4000261	PRJEB13893	Institute of Medical Microbiology and Hospital Epidemiology	2016-6-15	n/a	major	Contig	full		200x			GCA_900088185.1	GCF_900088185.1	yes
NZ_FLPY01000069.1	286	99.65	100	WP_064780111.1	STT-1-1-3-Cm	Helicobacter pylori (e-proteobacteria)		210	SAMEA4000261	PRJEB13893	Institute of Medical Microbiology and Hospital Epidemiology	2016-6-15	n/a	major	Contig	full		200x			GCA_900088185.1	GCF_900088185.1	yes
NZ_FLPY01000070.1	309	100	100		STT-1-1-3-Cm	Helicobacter pylori (e-proteobacteria)		210	SAMEA4000261	PRJEB13893	Institute of Medical Microbiology and Hospital Epidemiology	2016-6-15	n/a	major	Contig	full		200x			GCA_900088185.1	GCF_900088185.1	yes
NZ_FLPY01000073.1	286	99.65	100		STT-1-1-3-Cm	Helicobacter pylori (e-proteobacteria)		210	SAMEA4000261	PRJEB13893	Institute of Medical Microbiology and Hospital Epidemiology	2016-6-15	n/a	major	Contig	full		200x			GCA_900088185.1	GCF_900088185.1	yes
NZ_FLPY01000074.1	229	100	100		STT-1-1-3-Cm	Helicobacter pylori (e-proteobacteria)		210	SAMEA4000261	PRJEB13893	Institute of Medical Microbiology and Hospital Epidemiology	2016-6-15	n/a	major	Contig	full		200x			GCA_900088185.1	GCF_900088185.1	yes
NZ_FLPY01000077.1	234	99.57	100		STT-1-1-3-Cm	Helicobacter pylori (e-proteobacteria)		210	SAMEA4000261	PRJEB13893	Institute of Medical Microbiology and Hospital Epidemiology	2016-6-15	n/a	major	Contig	full		200x			GCA_900088185.1	GCF_900088185.1	yes
NZ_FLQG01000065.1	284	100	100		STT-1-2-2-Cm	Helicobacter pylori (e-proteobacteria)		210	SAMEA4000271	PRJEB13893	Institute of Medical Microbiology and Hospital Epidemiology	2016-6-15	n/a	major	Contig	full		196x			GCA_900088335.1	GCF_900088335.1	yes
NZ_FLQG01000067.1	255	100	100		STT-1-2-2-Cm	Helicobacter pylori (e-proteobacteria)		210	SAMEA4000271	PRJEB13893	Institute of Medical Microbiology and Hospital Epidemiology	2016-6-15	n/a	major	Contig	full		196x			GCA_900088335.1	GCF_900088335.1	yes
NZ_FLQG01000068.1	253	98.81	100		STT-1-2-2-Cm	Helicobacter pylori (e-proteobacteria)		210	SAMEA4000271	PRJEB13893	Institute of Medical Microbiology and Hospital Epidemiology	2016-6-15	n/a	major	Contig	full		196x			GCA_900088335.1	GCF_900088335.1	yes
NZ_FLQG01000069.1	262	99.62	100		STT-1-2-2-Cm	Helicobacter pylori (e-proteobacteria)		210	SAMEA4000271	PRJEB13893	Institute of Medical Microbiology and Hospital Epidemiology	2016-6-15	n/a	major	Contig	full		196x			GCA_900088335.1	GCF_900088335.1	yes
NZ_FLQG01000071.1	262	99.24	100		STT-1-2-2-Cm	Helicobacter pylori (e-proteobacteria)		210	SAMEA4000271	PRJEB13893	Institute of Medical Microbiology and Hospital Epidemiology	2016-6-15	n/a	major	Contig	full		196x			GCA_900088335.1	GCF_900088335.1	yes
NZ_FLQG01000074.1	240	99.58	100		STT-1-2-2-Cm	Helicobacter pylori (e-proteobacteria)		210	SAMEA4000271	PRJEB13893	Institute of Medical Microbiology and Hospital Epidemiology	2016-6-15	n/a	major	Contig	full		196x			GCA_900088335.1	GCF_900088335.1	yes
NZ_FLQG01000076.1	332	99.7	100		STT-1-2-2-Cm	Helicobacter pylori (e-proteobacteria)		210	SAMEA4000271	PRJEB13893	Institute of Medical Microbiology and Hospital Epidemiology	2016-6-15	n/a	major	Contig	full		196x			GCA_900088335.1	GCF_900088335.1	yes
NZ_FLQG01000077.1	279	99.64	100		STT-1-2-2-Cm	Helicobacter pylori (e-proteobacteria)		210	SAMEA4000271	PRJEB13893	Institute of Medical Microbiology and Hospital Epidemiology	2016-6-15	n/a	major	Contig	full		196x			GCA_900088335.1	GCF_900088335.1	yes
NZ_FLQG01000080.1	286	100	97.9		STT-1-2-2-Cm	Helicobacter pylori (e-proteobacteria)		210	SAMEA4000271	PRJEB13893	Institute of Medical Microbiology and Hospital Epidemiology	2016-6-15	n/a	major	Contig	full		196x			GCA_900088335.1	GCF_900088335.1	yes
NZ_FLQI01000089.1	265	100	100		STT-1-1-5-Cm	Helicobacter pylori (e-proteobacteria)		210	SAMEA4000263	PRJEB13893	Institute of Medical Microbiology and Hospital Epidemiology	2016-6-15	n/a	major	Contig	full		256x			GCA_900088205.1	GCF_900088205.1	yes
NZ_FLQI01000093.1	245	100	100		STT-1-1-5-Cm	Helicobacter pylori (e-proteobacteria)		210	SAMEA4000263	PRJEB13893	Institute of Medical Microbiology and Hospital Epidemiology	2016-6-15	n/a	major	Contig	full		256x			GCA_900088205.1	GCF_900088205.1	yes
NZ_FLQI01000094.1	231	100	100		STT-1-1-5-Cm	Helicobacter pylori (e-proteobacteria)		210	SAMEA4000263	PRJEB13893	Institute of Medical Microbiology and Hospital Epidemiology	2016-6-15	n/a	major	Contig	full		256x			GCA_900088205.1	GCF_900088205.1	yes
NZ_FLQI01000097.1	273	99.63	100		STT-1-1-5-Cm	Helicobacter pylori (e-proteobacteria)		210	SAMEA4000263	PRJEB13893	Institute of Medical Microbiology and Hospital Epidemiology	2016-6-15	n/a	major	Contig	full		256x			GCA_900088205.1	GCF_900088205.1	yes
NZ_FLQI01000099.1	388	100	100		STT-1-1-5-Cm	Helicobacter pylori (e-proteobacteria)		210	SAMEA4000263	PRJEB13893	Institute of Medical Microbiology and Hospital Epidemiology	2016-6-15	n/a	major	Contig	full		256x			GCA_900088205.1	GCF_900088205.1	yes
NZ_FLQI01000100.1	274	99.27	100		STT-1-1-5-Cm	Helicobacter pylori (e-proteobacteria)		210	SAMEA4000263	PRJEB13893	Institute of Medical Microbiology and Hospital Epidemiology	2016-6-15	n/a	major	Contig	full		256x			GCA_900088205.1	GCF_900088205.1	yes
NZ_FLQI01000103.1	263	100	100		STT-1-1-5-Cm	Helicobacter pylori (e-proteobacteria)		210	SAMEA4000263	PRJEB13893	Institute of Medical Microbiology and Hospital Epidemiology	2016-6-15	n/a	major	Contig	full		256x			GCA_900088205.1	GCF_900088205.1	yes
NZ_FLQI01000106.1	288	99.31	100		STT-1-1-5-Cm	Helicobacter pylori (e-proteobacteria)		210	SAMEA4000263	PRJEB13893	Institute of Medical Microbiology and Hospital Epidemiology	2016-6-15	n/a	major	Contig	full		256x			GCA_900088205.1	GCF_900088205.1	yes
NZ_FLQI01000107.1	280	99.29	100		STT-1-1-5-Cm	Helicobacter pylori (e-proteobacteria)		210	SAMEA4000263	PRJEB13893	Institute of Medical Microbiology and Hospital Epidemiology	2016-6-15	n/a	major	Contig	full		256x			GCA_900088205.1	GCF_900088205.1	yes
NZ_FLQI01000110.1	278	100	100		STT-1-1-5-Cm	Helicobacter pylori (e-proteobacteria)		210	SAMEA4000263	PRJEB13893	Institute of Medical Microbiology and Hospital Epidemiology	2016-6-15	n/a	major	Contig	full		256x			GCA_900088205.1	GCF_900088205.1	yes
NZ_FLQI01000111.1	228	100	100		STT-1-1-5-Cm	Helicobacter pylori (e-proteobacteria)		210	SAMEA4000263	PRJEB13893	Institute of Medical Microbiology and Hospital Epidemiology	2016-6-15	n/a	major	Contig	full		256x			GCA_900088205.1	GCF_900088205.1	yes
NZ_FLQM01000068.1	235	100	100		STT-1-2-3-Cm	Helicobacter pylori (e-proteobacteria)		210	SAMEA4000272	PRJEB13893	Institute of Medical Microbiology and Hospital Epidemiology	2016-6-15	n/a	major	Contig	full		269x			GCA_900088265.1	GCF_900088265.1	yes
NZ_FLQM01000075.1	252	98.81	100		STT-1-2-3-Cm	Helicobacter pylori (e-proteobacteria)		210	SAMEA4000272	PRJEB13893	Institute of Medical Microbiology and Hospital Epidemiology	2016-6-15	n/a	major	Contig	full		269x			GCA_900088265.1	GCF_900088265.1	yes
NZ_FLQM01000077.1	258	100	100		STT-1-2-3-Cm	Helicobacter pylori (e-proteobacteria)		210	SAMEA4000272	PRJEB13893	Institute of Medical Microbiology and Hospital Epidemiology	2016-6-15	n/a	major	Contig	full		269x			GCA_900088265.1	GCF_900088265.1	yes
NZ_FLQM01000079.1	273	100	99.63		STT-1-2-3-Cm	Helicobacter pylori (e-proteobacteria)		210	SAMEA4000272	PRJEB13893	Institute of Medical Microbiology and Hospital Epidemiology	2016-6-15	n/a	major	Contig	full		269x			GCA_900088265.1	GCF_900088265.1	yes
NZ_FLYR01000124.1	255	100	100		scaffolds_20160016	Escherichia coli (E. coli)		562	SAMEA4350780	PRJEB14873	academisch medisch centrum	2016-12-3	n/a	major	Scaffold	full		100x			GCA_900093955.1	GCF_900093955.1	yes
NZ_FLYR01000129.1	247	99.19	100		scaffolds_20160016	Escherichia coli (E. coli)		562	SAMEA4350780	PRJEB14873	academisch medisch centrum	2016-12-3	n/a	major	Scaffold	full		100x			GCA_900093955.1	GCF_900093955.1	yes
NZ_FLYR01000131.1	245	99.59	100		scaffolds_20160016	Escherichia coli (E. coli)		562	SAMEA4350780	PRJEB14873	academisch medisch centrum	2016-12-3	n/a	major	Scaffold	full		100x			GCA_900093955.1	GCF_900093955.1	yes
NZ_FLYR01000137.1	241	100	100		scaffolds_20160016	Escherichia coli (E. coli)		562	SAMEA4350780	PRJEB14873	academisch medisch centrum	2016-12-3	n/a	major	Scaffold	full		100x			GCA_900093955.1	GCF_900093955.1	yes
NZ_FLYR01000143.1	232	100	100		scaffolds_20160016	Escherichia coli (E. coli)		562	SAMEA4350780	PRJEB14873	academisch medisch centrum	2016-12-3	n/a	major	Scaffold	full		100x			GCA_900093955.1	GCF_900093955.1	yes
NZ_FLYS01000138.1	446	100	100		scaffolds_20160006	Escherichia coli (E. coli)		562	SAMEA4350776	PRJEB14873	academisch medisch centrum	2016-12-3	n/a	major	Scaffold	full		100x			GCA_900094005.1	GCF_900094005.1	yes
NZ_FLYS01000139.1	438	99.32	100		scaffolds_20160006	Escherichia coli (E. coli)		562	SAMEA4350776	PRJEB14873	academisch medisch centrum	2016-12-3	n/a	major	Scaffold	full		100x			GCA_900094005.1	GCF_900094005.1	yes
NZ_FLYS01000141.1	411	100	100		scaffolds_20160006	Escherichia coli (E. coli)		562	SAMEA4350776	PRJEB14873	academisch medisch centrum	2016-12-3	n/a	major	Scaffold	full		100x			GCA_900094005.1	GCF_900094005.1	yes
NZ_FLYS01000142.1	411	99.76	100		scaffolds_20160006	Escherichia coli (E. coli)		562	SAMEA4350776	PRJEB14873	academisch medisch centrum	2016-12-3	n/a	major	Scaffold	full		100x			GCA_900094005.1	GCF_900094005.1	yes
NZ_FLYS01000143.1	405	97.04	100		scaffolds_20160006	Escherichia coli (E. coli)		562	SAMEA4350776	PRJEB14873	academisch medisch centrum	2016-12-3	n/a	major	Scaffold	full		100x			GCA_900094005.1	GCF_900094005.1	yes
NZ_FLYS01000147.1	367	100	100	WP_073034637.1	scaffolds_20160006	Escherichia coli (E. coli)		562	SAMEA4350776	PRJEB14873	academisch medisch centrum	2016-12-3	n/a	major	Scaffold	full		100x			GCA_900094005.1	GCF_900094005.1	yes
NZ_FLYS01000149.1	356	99.44	100	WP_072794624.1	scaffolds_20160006	Escherichia coli (E. coli)		562	SAMEA4350776	PRJEB14873	academisch medisch centrum	2016-12-3	n/a	major	Scaffold	full		100x			GCA_900094005.1	GCF_900094005.1	yes
NZ_FLYS01000151.1	351	100	100		scaffolds_20160006	Escherichia coli (E. coli)		562	SAMEA4350776	PRJEB14873	academisch medisch centrum	2016-12-3	n/a	major	Scaffold	full		100x			GCA_900094005.1	GCF_900094005.1	yes
NZ_FLYS01000152.1	350	100	100	WP_072794684.1	scaffolds_20160006	Escherichia coli (E. coli)		562	SAMEA4350776	PRJEB14873	academisch medisch centrum	2016-12-3	n/a	major	Scaffold	full		100x			GCA_900094005.1	GCF_900094005.1	yes
NZ_FLYS01000153.1	348	100	100		scaffolds_20160006	Escherichia coli (E. coli)		562	SAMEA4350776	PRJEB14873	academisch medisch centrum	2016-12-3	n/a	major	Scaffold	full		100x			GCA_900094005.1	GCF_900094005.1	yes
NZ_FLYS01000154.1	343	99.71	100		scaffolds_20160006	Escherichia coli (E. coli)		562	SAMEA4350776	PRJEB14873	academisch medisch centrum	2016-12-3	n/a	major	Scaffold	full		100x			GCA_900094005.1	GCF_900094005.1	yes
NZ_FLYS01000156.1	338	99.7	100		scaffolds_20160006	Escherichia coli (E. coli)		562	SAMEA4350776	PRJEB14873	academisch medisch centrum	2016-12-3	n/a	major	Scaffold	full		100x			GCA_900094005.1	GCF_900094005.1	yes
NZ_FLYS01000157.1	338	100	100		scaffolds_20160006	Escherichia coli (E. coli)		562	SAMEA4350776	PRJEB14873	academisch medisch centrum	2016-12-3	n/a	major	Scaffold	full		100x			GCA_900094005.1	GCF_900094005.1	yes
NZ_FLYS01000158.1	334	100	100		scaffolds_20160006	Escherichia coli (E. coli)		562	SAMEA4350776	PRJEB14873	academisch medisch centrum	2016-12-3	n/a	major	Scaffold	full		100x			GCA_900094005.1	GCF_900094005.1	yes
NZ_FLYS01000159.1	333	100	100	WP_073034639.1	scaffolds_20160006	Escherichia coli (E. coli)		562	SAMEA4350776	PRJEB14873	academisch medisch centrum	2016-12-3	n/a	major	Scaffold	full		100x			GCA_900094005.1	GCF_900094005.1	yes
NZ_FLYS01000160.1	332	100	100		scaffolds_20160006	Escherichia coli (E. coli)		562	SAMEA4350776	PRJEB14873	academisch medisch centrum	2016-12-3	n/a	major	Scaffold	full		100x			GCA_900094005.1	GCF_900094005.1	yes
NZ_FLYS01000161.1	332	99.4	100		scaffolds_20160006	Escherichia coli (E. coli)		562	SAMEA4350776	PRJEB14873	academisch medisch centrum	2016-12-3	n/a	major	Scaffold	full		100x			GCA_900094005.1	GCF_900094005.1	yes
NZ_FLYS01000162.1	331	100	100		scaffolds_20160006	Escherichia coli (E. coli)		562	SAMEA4350776	PRJEB14873	academisch medisch centrum	2016-12-3	n/a	major	Scaffold	full		100x			GCA_900094005.1	GCF_900094005.1	yes
NZ_FLYS01000164.1	325	100	100		scaffolds_20160006	Escherichia coli (E. coli)		562	SAMEA4350776	PRJEB14873	academisch medisch centrum	2016-12-3	n/a	major	Scaffold	full		100x			GCA_900094005.1	GCF_900094005.1	yes
NZ_FLYS01000165.1	324	100	100		scaffolds_20160006	Escherichia coli (E. coli)		562	SAMEA4350776	PRJEB14873	academisch medisch centrum	2016-12-3	n/a	major	Scaffold	full		100x			GCA_900094005.1	GCF_900094005.1	yes
NZ_FLYS01000166.1	322	99.69	100		scaffolds_20160006	Escherichia coli (E. coli)		562	SAMEA4350776	PRJEB14873	academisch medisch centrum	2016-12-3	n/a	major	Scaffold	full		100x			GCA_900094005.1	GCF_900094005.1	yes
NZ_FLYS01000167.1	321	100	100		scaffolds_20160006	Escherichia coli (E. coli)		562	SAMEA4350776	PRJEB14873	academisch medisch centrum	2016-12-3	n/a	major	Scaffold	full		100x			GCA_900094005.1	GCF_900094005.1	yes
NZ_FLYS01000168.1	321	100	100		scaffolds_20160006	Escherichia coli (E. coli)		562	SAMEA4350776	PRJEB14873	academisch medisch centrum	2016-12-3	n/a	major	Scaffold	full		100x			GCA_900094005.1	GCF_900094005.1	yes
NZ_FLYS01000169.1	320	100	100		scaffolds_20160006	Escherichia coli (E. coli)		562	SAMEA4350776	PRJEB14873	academisch medisch centrum	2016-12-3	n/a	major	Scaffold	full		100x			GCA_900094005.1	GCF_900094005.1	yes
NZ_FLYS01000170.1	319	100	100		scaffolds_20160006	Escherichia coli (E. coli)		562	SAMEA4350776	PRJEB14873	academisch medisch centrum	2016-12-3	n/a	major	Scaffold	full		100x			GCA_900094005.1	GCF_900094005.1	yes
NZ_FLYS01000171.1	319	100	100		scaffolds_20160006	Escherichia coli (E. coli)		562	SAMEA4350776	PRJEB14873	academisch medisch centrum	2016-12-3	n/a	major	Scaffold	full		100x			GCA_900094005.1	GCF_900094005.1	yes
NZ_FLYS01000172.1	317	100	100		scaffolds_20160006	Escherichia coli (E. coli)		562	SAMEA4350776	PRJEB14873	academisch medisch centrum	2016-12-3	n/a	major	Scaffold	full		100x			GCA_900094005.1	GCF_900094005.1	yes
NZ_FLYS01000173.1	315	100	100		scaffolds_20160006	Escherichia coli (E. coli)		562	SAMEA4350776	PRJEB14873	academisch medisch centrum	2016-12-3	n/a	major	Scaffold	full		100x			GCA_900094005.1	GCF_900094005.1	yes
NZ_FLYS01000174.1	308	100	100		scaffolds_20160006	Escherichia coli (E. coli)		562	SAMEA4350776	PRJEB14873	academisch medisch centrum	2016-12-3	n/a	major	Scaffold	full		100x			GCA_900094005.1	GCF_900094005.1	yes
NZ_FLYS01000176.1	307	100	100		scaffolds_20160006	Escherichia coli (E. coli)		562	SAMEA4350776	PRJEB14873	academisch medisch centrum	2016-12-3	n/a	major	Scaffold	full		100x			GCA_900094005.1	GCF_900094005.1	yes
NZ_FLYS01000177.1	305	100	100		scaffolds_20160006	Escherichia coli (E. coli)		562	SAMEA4350776	PRJEB14873	academisch medisch centrum	2016-12-3	n/a	major	Scaffold	full		100x			GCA_900094005.1	GCF_900094005.1	yes
NZ_FLYS01000178.1	305	100	100		scaffolds_20160006	Escherichia coli (E. coli)		562	SAMEA4350776	PRJEB14873	academisch medisch centrum	2016-12-3	n/a	major	Scaffold	full		100x			GCA_900094005.1	GCF_900094005.1	yes
NZ_FLYS01000179.1	305	100	100		scaffolds_20160006	Escherichia coli (E. coli)		562	SAMEA4350776	PRJEB14873	academisch medisch centrum	2016-12-3	n/a	major	Scaffold	full		100x			GCA_900094005.1	GCF_900094005.1	yes
NZ_FLYS01000180.1	302	100	100		scaffolds_20160006	Escherichia coli (E. coli)		562	SAMEA4350776	PRJEB14873	academisch medisch centrum	2016-12-3	n/a	major	Scaffold	full		100x			GCA_900094005.1	GCF_900094005.1	yes
NZ_FLYS01000181.1	300	100	100		scaffolds_20160006	Escherichia coli (E. coli)		562	SAMEA4350776	PRJEB14873	academisch medisch centrum	2016-12-3	n/a	major	Scaffold	full		100x			GCA_900094005.1	GCF_900094005.1	yes
NZ_FLYS01000184.1	296	100	100		scaffolds_20160006	Escherichia coli (E. coli)		562	SAMEA4350776	PRJEB14873	academisch medisch centrum	2016-12-3	n/a	major	Scaffold	full		100x			GCA_900094005.1	GCF_900094005.1	yes
NZ_FLYS01000185.1	291	100	100		scaffolds_20160006	Escherichia coli (E. coli)		562	SAMEA4350776	PRJEB14873	academisch medisch centrum	2016-12-3	n/a	major	Scaffold	full		100x			GCA_900094005.1	GCF_900094005.1	yes
NZ_FLYS01000186.1	289	100	100		scaffolds_20160006	Escherichia coli (E. coli)		562	SAMEA4350776	PRJEB14873	academisch medisch centrum	2016-12-3	n/a	major	Scaffold	full		100x			GCA_900094005.1	GCF_900094005.1	yes
NZ_FLYS01000187.1	288	100	100		scaffolds_20160006	Escherichia coli (E. coli)		562	SAMEA4350776	PRJEB14873	academisch medisch centrum	2016-12-3	n/a	major	Scaffold	full		100x			GCA_900094005.1	GCF_900094005.1	yes
NZ_FLYS01000188.1	288	99.31	100		scaffolds_20160006	Escherichia coli (E. coli)		562	SAMEA4350776	PRJEB14873	academisch medisch centrum	2016-12-3	n/a	major	Scaffold	full		100x			GCA_900094005.1	GCF_900094005.1	yes
NZ_FLYS01000189.1	286	100	100		scaffolds_20160006	Escherichia coli (E. coli)		562	SAMEA4350776	PRJEB14873	academisch medisch centrum	2016-12-3	n/a	major	Scaffold	full		100x			GCA_900094005.1	GCF_900094005.1	yes
NZ_FLYS01000190.1	282	100	100		scaffolds_20160006	Escherichia coli (E. coli)		562	SAMEA4350776	PRJEB14873	academisch medisch centrum	2016-12-3	n/a	major	Scaffold	full		100x			GCA_900094005.1	GCF_900094005.1	yes
NZ_FLYS01000191.1	281	100	100		scaffolds_20160006	Escherichia coli (E. coli)		562	SAMEA4350776	PRJEB14873	academisch medisch centrum	2016-12-3	n/a	major	Scaffold	full		100x			GCA_900094005.1	GCF_900094005.1	yes
NZ_FLYS01000192.1	277	100	100		scaffolds_20160006	Escherichia coli (E. coli)		562	SAMEA4350776	PRJEB14873	academisch medisch centrum	2016-12-3	n/a	major	Scaffold	full		100x			GCA_900094005.1	GCF_900094005.1	yes
NZ_FLYS01000193.1	277	100	100		scaffolds_20160006	Escherichia coli (E. coli)		562	SAMEA4350776	PRJEB14873	academisch medisch centrum	2016-12-3	n/a	major	Scaffold	full		100x			GCA_900094005.1	GCF_900094005.1	yes
NZ_FLYS01000194.1	277	100	100		scaffolds_20160006	Escherichia coli (E. coli)		562	SAMEA4350776	PRJEB14873	academisch medisch centrum	2016-12-3	n/a	major	Scaffold	full		100x			GCA_900094005.1	GCF_900094005.1	yes
NZ_FLYS01000195.1	276	99.28	100		scaffolds_20160006	Escherichia coli (E. coli)		562	SAMEA4350776	PRJEB14873	academisch medisch centrum	2016-12-3	n/a	major	Scaffold	full		100x			GCA_900094005.1	GCF_900094005.1	yes
NZ_FLYS01000196.1	275	100	100	WP_073034642.1	scaffolds_20160006	Escherichia coli (E. coli)		562	SAMEA4350776	PRJEB14873	academisch medisch centrum	2016-12-3	n/a	major	Scaffold	full		100x			GCA_900094005.1	GCF_900094005.1	yes
NZ_FLYS01000197.1	274	100	100		scaffolds_20160006	Escherichia coli (E. coli)		562	SAMEA4350776	PRJEB14873	academisch medisch centrum	2016-12-3	n/a	major	Scaffold	full		100x			GCA_900094005.1	GCF_900094005.1	yes
NZ_FLYS01000199.1	273	100	100		scaffolds_20160006	Escherichia coli (E. coli)		562	SAMEA4350776	PRJEB14873	academisch medisch centrum	2016-12-3	n/a	major	Scaffold	full		100x			GCA_900094005.1	GCF_900094005.1	yes
NZ_FLYS01000200.1	272	100	100		scaffolds_20160006	Escherichia coli (E. coli)		562	SAMEA4350776	PRJEB14873	academisch medisch centrum	2016-12-3	n/a	major	Scaffold	full		100x			GCA_900094005.1	GCF_900094005.1	yes
NZ_FLYS01000201.1	271	100	100		scaffolds_20160006	Escherichia coli (E. coli)		562	SAMEA4350776	PRJEB14873	academisch medisch centrum	2016-12-3	n/a	major	Scaffold	full		100x			GCA_900094005.1	GCF_900094005.1	yes
NZ_FLYS01000202.1	270	100	100		scaffolds_20160006	Escherichia coli (E. coli)		562	SAMEA4350776	PRJEB14873	academisch medisch centrum	2016-12-3	n/a	major	Scaffold	full		100x			GCA_900094005.1	GCF_900094005.1	yes
NZ_FLYS01000204.1	268	100	100		scaffolds_20160006	Escherichia coli (E. coli)		562	SAMEA4350776	PRJEB14873	academisch medisch centrum	2016-12-3	n/a	major	Scaffold	full		100x			GCA_900094005.1	GCF_900094005.1	yes
NZ_FLYS01000206.1	267	99.63	100		scaffolds_20160006	Escherichia coli (E. coli)		562	SAMEA4350776	PRJEB14873	academisch medisch centrum	2016-12-3	n/a	major	Scaffold	full		100x			GCA_900094005.1	GCF_900094005.1	yes
NZ_FLYS01000207.1	266	99.62	100		scaffolds_20160006	Escherichia coli (E. coli)		562	SAMEA4350776	PRJEB14873	academisch medisch centrum	2016-12-3	n/a	major	Scaffold	full		100x			GCA_900094005.1	GCF_900094005.1	yes
NZ_FLYS01000208.1	266	100	100		scaffolds_20160006	Escherichia coli (E. coli)		562	SAMEA4350776	PRJEB14873	academisch medisch centrum	2016-12-3	n/a	major	Scaffold	full		100x			GCA_900094005.1	GCF_900094005.1	yes
NZ_FLYS01000209.1	265	100	100		scaffolds_20160006	Escherichia coli (E. coli)		562	SAMEA4350776	PRJEB14873	academisch medisch centrum	2016-12-3	n/a	major	Scaffold	full		100x			GCA_900094005.1	GCF_900094005.1	yes
NZ_FLYS01000210.1	264	100	100		scaffolds_20160006	Escherichia coli (E. coli)		562	SAMEA4350776	PRJEB14873	academisch medisch centrum	2016-12-3	n/a	major	Scaffold	full		100x			GCA_900094005.1	GCF_900094005.1	yes
NZ_FLYS01000211.1	264	100	100		scaffolds_20160006	Escherichia coli (E. coli)		562	SAMEA4350776	PRJEB14873	academisch medisch centrum	2016-12-3	n/a	major	Scaffold	full		100x			GCA_900094005.1	GCF_900094005.1	yes
NZ_FLYS01000213.1	263	100	100		scaffolds_20160006	Escherichia coli (E. coli)		562	SAMEA4350776	PRJEB14873	academisch medisch centrum	2016-12-3	n/a	major	Scaffold	full		100x			GCA_900094005.1	GCF_900094005.1	yes
NZ_FLYS01000215.1	262	98.85	100		scaffolds_20160006	Escherichia coli (E. coli)		562	SAMEA4350776	PRJEB14873	academisch medisch centrum	2016-12-3	n/a	major	Scaffold	full		100x			GCA_900094005.1	GCF_900094005.1	yes
NZ_FLYS01000217.1	260	99.62	100		scaffolds_20160006	Escherichia coli (E. coli)		562	SAMEA4350776	PRJEB14873	academisch medisch centrum	2016-12-3	n/a	major	Scaffold	full		100x			GCA_900094005.1	GCF_900094005.1	yes
NZ_FLYS01000218.1	260	100	100		scaffolds_20160006	Escherichia coli (E. coli)		562	SAMEA4350776	PRJEB14873	academisch medisch centrum	2016-12-3	n/a	major	Scaffold	full		100x			GCA_900094005.1	GCF_900094005.1	yes
NZ_FLYS01000219.1	259	99.61	100		scaffolds_20160006	Escherichia coli (E. coli)		562	SAMEA4350776	PRJEB14873	academisch medisch centrum	2016-12-3	n/a	major	Scaffold	full		100x			GCA_900094005.1	GCF_900094005.1	yes
NZ_FLYS01000220.1	259	99.61	100		scaffolds_20160006	Escherichia coli (E. coli)		562	SAMEA4350776	PRJEB14873	academisch medisch centrum	2016-12-3	n/a	major	Scaffold	full		100x			GCA_900094005.1	GCF_900094005.1	yes
NZ_FLYS01000221.1	257	100	100		scaffolds_20160006	Escherichia coli (E. coli)		562	SAMEA4350776	PRJEB14873	academisch medisch centrum	2016-12-3	n/a	major	Scaffold	full		100x			GCA_900094005.1	GCF_900094005.1	yes
NZ_FLYS01000223.1	256	100	100		scaffolds_20160006	Escherichia coli (E. coli)		562	SAMEA4350776	PRJEB14873	academisch medisch centrum	2016-12-3	n/a	major	Scaffold	full		100x			GCA_900094005.1	GCF_900094005.1	yes
NZ_FLYS01000225.1	255	99.61	100		scaffolds_20160006	Escherichia coli (E. coli)		562	SAMEA4350776	PRJEB14873	academisch medisch centrum	2016-12-3	n/a	major	Scaffold	full		100x			GCA_900094005.1	GCF_900094005.1	yes
NZ_FLYS01000226.1	254	100	100		scaffolds_20160006	Escherichia coli (E. coli)		562	SAMEA4350776	PRJEB14873	academisch medisch centrum	2016-12-3	n/a	major	Scaffold	full		100x			GCA_900094005.1	GCF_900094005.1	yes
NZ_FLYS01000227.1	254	100	100		scaffolds_20160006	Escherichia coli (E. coli)		562	SAMEA4350776	PRJEB14873	academisch medisch centrum	2016-12-3	n/a	major	Scaffold	full		100x			GCA_900094005.1	GCF_900094005.1	yes
NZ_FLYS01000228.1	253	100	100		scaffolds_20160006	Escherichia coli (E. coli)		562	SAMEA4350776	PRJEB14873	academisch medisch centrum	2016-12-3	n/a	major	Scaffold	full		100x			GCA_900094005.1	GCF_900094005.1	yes
NZ_FLYS01000229.1	252	100	100		scaffolds_20160006	Escherichia coli (E. coli)		562	SAMEA4350776	PRJEB14873	academisch medisch centrum	2016-12-3	n/a	major	Scaffold	full		100x			GCA_900094005.1	GCF_900094005.1	yes
NZ_FLYS01000230.1	252	100	100		scaffolds_20160006	Escherichia coli (E. coli)		562	SAMEA4350776	PRJEB14873	academisch medisch centrum	2016-12-3	n/a	major	Scaffold	full		100x			GCA_900094005.1	GCF_900094005.1	yes
NZ_FLYS01000231.1	250	100	100		scaffolds_20160006	Escherichia coli (E. coli)		562	SAMEA4350776	PRJEB14873	academisch medisch centrum	2016-12-3	n/a	major	Scaffold	full		100x			GCA_900094005.1	GCF_900094005.1	yes
NZ_FLYS01000232.1	250	100	100		scaffolds_20160006	Escherichia coli (E. coli)		562	SAMEA4350776	PRJEB14873	academisch medisch centrum	2016-12-3	n/a	major	Scaffold	full		100x			GCA_900094005.1	GCF_900094005.1	yes
NZ_FLYS01000233.1	249	99.6	100		scaffolds_20160006	Escherichia coli (E. coli)		562	SAMEA4350776	PRJEB14873	academisch medisch centrum	2016-12-3	n/a	major	Scaffold	full		100x			GCA_900094005.1	GCF_900094005.1	yes
NZ_FLYS01000234.1	249	100	100		scaffolds_20160006	Escherichia coli (E. coli)		562	SAMEA4350776	PRJEB14873	academisch medisch centrum	2016-12-3	n/a	major	Scaffold	full		100x			GCA_900094005.1	GCF_900094005.1	yes
NZ_FLYS01000235.1	247	99.6	100		scaffolds_20160006	Escherichia coli (E. coli)		562	SAMEA4350776	PRJEB14873	academisch medisch centrum	2016-12-3	n/a	major	Scaffold	full		100x			GCA_900094005.1	GCF_900094005.1	yes
NZ_FLYS01000236.1	246	99.59	100		scaffolds_20160006	Escherichia coli (E. coli)		562	SAMEA4350776	PRJEB14873	academisch medisch centrum	2016-12-3	n/a	major	Scaffold	full		100x			GCA_900094005.1	GCF_900094005.1	yes
NZ_FLYS01000238.1	245	99.59	100		scaffolds_20160006	Escherichia coli (E. coli)		562	SAMEA4350776	PRJEB14873	academisch medisch centrum	2016-12-3	n/a	major	Scaffold	full		100x			GCA_900094005.1	GCF_900094005.1	yes
NZ_FLYS01000239.1	245	98.76	98.78		scaffolds_20160006	Escherichia coli (E. coli)		562	SAMEA4350776	PRJEB14873	academisch medisch centrum	2016-12-3	n/a	major	Scaffold	full		100x			GCA_900094005.1	GCF_900094005.1	yes
NZ_FLYS01000240.1	244	100	100		scaffolds_20160006	Escherichia coli (E. coli)		562	SAMEA4350776	PRJEB14873	academisch medisch centrum	2016-12-3	n/a	major	Scaffold	full		100x			GCA_900094005.1	GCF_900094005.1	yes
NZ_FLYS01000241.1	243	100	100		scaffolds_20160006	Escherichia coli (E. coli)		562	SAMEA4350776	PRJEB14873	academisch medisch centrum	2016-12-3	n/a	major	Scaffold	full		100x			GCA_900094005.1	GCF_900094005.1	yes
NZ_FLYS01000242.1	242	100	99.59		scaffolds_20160006	Escherichia coli (E. coli)		562	SAMEA4350776	PRJEB14873	academisch medisch centrum	2016-12-3	n/a	major	Scaffold	full		100x			GCA_900094005.1	GCF_900094005.1	yes
NZ_FLYS01000243.1	242	100	100		scaffolds_20160006	Escherichia coli (E. coli)		562	SAMEA4350776	PRJEB14873	academisch medisch centrum	2016-12-3	n/a	major	Scaffold	full		100x			GCA_900094005.1	GCF_900094005.1	yes
NZ_FLYS01000244.1	241	100	100		scaffolds_20160006	Escherichia coli (E. coli)		562	SAMEA4350776	PRJEB14873	academisch medisch centrum	2016-12-3	n/a	major	Scaffold	full		100x			GCA_900094005.1	GCF_900094005.1	yes
NZ_FLYS01000245.1	239	100	100		scaffolds_20160006	Escherichia coli (E. coli)		562	SAMEA4350776	PRJEB14873	academisch medisch centrum	2016-12-3	n/a	major	Scaffold	full		100x			GCA_900094005.1	GCF_900094005.1	yes
NZ_FLYS01000246.1	239	100	100		scaffolds_20160006	Escherichia coli (E. coli)		562	SAMEA4350776	PRJEB14873	academisch medisch centrum	2016-12-3	n/a	major	Scaffold	full		100x			GCA_900094005.1	GCF_900094005.1	yes
NZ_FLYS01000247.1	239	100	100		scaffolds_20160006	Escherichia coli (E. coli)		562	SAMEA4350776	PRJEB14873	academisch medisch centrum	2016-12-3	n/a	major	Scaffold	full		100x			GCA_900094005.1	GCF_900094005.1	yes
NZ_FLYS01000248.1	239	99.58	100		scaffolds_20160006	Escherichia coli (E. coli)		562	SAMEA4350776	PRJEB14873	academisch medisch centrum	2016-12-3	n/a	major	Scaffold	full		100x			GCA_900094005.1	GCF_900094005.1	yes
NZ_FLYS01000250.1	238	99.58	100		scaffolds_20160006	Escherichia coli (E. coli)		562	SAMEA4350776	PRJEB14873	academisch medisch centrum	2016-12-3	n/a	major	Scaffold	full		100x			GCA_900094005.1	GCF_900094005.1	yes
NZ_FLYS01000251.1	235	100	100		scaffolds_20160006	Escherichia coli (E. coli)		562	SAMEA4350776	PRJEB14873	academisch medisch centrum	2016-12-3	n/a	major	Scaffold	full		100x			GCA_900094005.1	GCF_900094005.1	yes
NZ_FLYS01000253.1	234	100	100	WP_072794668.1	scaffolds_20160006	Escherichia coli (E. coli)		562	SAMEA4350776	PRJEB14873	academisch medisch centrum	2016-12-3	n/a	major	Scaffold	full		100x			GCA_900094005.1	GCF_900094005.1	yes
NZ_FLYS01000255.1	233	100	100		scaffolds_20160006	Escherichia coli (E. coli)		562	SAMEA4350776	PRJEB14873	academisch medisch centrum	2016-12-3	n/a	major	Scaffold	full		100x			GCA_900094005.1	GCF_900094005.1	yes
NZ_FLYS01000256.1	233	99.57	100		scaffolds_20160006	Escherichia coli (E. coli)		562	SAMEA4350776	PRJEB14873	academisch medisch centrum	2016-12-3	n/a	major	Scaffold	full		100x			GCA_900094005.1	GCF_900094005.1	yes
NZ_FLYS01000258.1	232	100	100		scaffolds_20160006	Escherichia coli (E. coli)		562	SAMEA4350776	PRJEB14873	academisch medisch centrum	2016-12-3	n/a	major	Scaffold	full		100x			GCA_900094005.1	GCF_900094005.1	yes
NZ_FLYS01000259.1	232	100	100		scaffolds_20160006	Escherichia coli (E. coli)		562	SAMEA4350776	PRJEB14873	academisch medisch centrum	2016-12-3	n/a	major	Scaffold	full		100x			GCA_900094005.1	GCF_900094005.1	yes
NZ_FLYS01000260.1	232	100	100		scaffolds_20160006	Escherichia coli (E. coli)		562	SAMEA4350776	PRJEB14873	academisch medisch centrum	2016-12-3	n/a	major	Scaffold	full		100x			GCA_900094005.1	GCF_900094005.1	yes
NZ_FLYS01000261.1	231	100	100		scaffolds_20160006	Escherichia coli (E. coli)		562	SAMEA4350776	PRJEB14873	academisch medisch centrum	2016-12-3	n/a	major	Scaffold	full		100x			GCA_900094005.1	GCF_900094005.1	yes
NZ_FLYS01000263.1	230	100	100		scaffolds_20160006	Escherichia coli (E. coli)		562	SAMEA4350776	PRJEB14873	academisch medisch centrum	2016-12-3	n/a	major	Scaffold	full		100x			GCA_900094005.1	GCF_900094005.1	yes
NZ_FLYS01000264.1	230	100	100		scaffolds_20160006	Escherichia coli (E. coli)		562	SAMEA4350776	PRJEB14873	academisch medisch centrum	2016-12-3	n/a	major	Scaffold	full		100x			GCA_900094005.1	GCF_900094005.1	yes
NZ_FLYS01000265.1	230	99.57	100		scaffolds_20160006	Escherichia coli (E. coli)		562	SAMEA4350776	PRJEB14873	academisch medisch centrum	2016-12-3	n/a	major	Scaffold	full		100x			GCA_900094005.1	GCF_900094005.1	yes
NZ_FLYS01000267.1	229	100	100	WP_077248808.1	scaffolds_20160006	Escherichia coli (E. coli)		562	SAMEA4350776	PRJEB14873	academisch medisch centrum	2016-12-3	n/a	major	Scaffold	full		100x			GCA_900094005.1	GCF_900094005.1	yes
NZ_FLYT01000113.1	878	99.89	100	WP_072800896.1	scaffolds_20151359	Escherichia coli (E. coli)		562	SAMEA4350773	PRJEB14873	academisch medisch centrum	2016-12-3	n/a	major	Scaffold	full		100x			GCA_900093885.1	GCF_900093885.1	yes
NZ_FLYT01000115.1	812	99.63	100		scaffolds_20151359	Escherichia coli (E. coli)		562	SAMEA4350773	PRJEB14873	academisch medisch centrum	2016-12-3	n/a	major	Scaffold	full		100x			GCA_900093885.1	GCF_900093885.1	yes
NZ_FLYT01000122.1	704	100	100	WP_072800898.1	scaffolds_20151359	Escherichia coli (E. coli)		562	SAMEA4350773	PRJEB14873	academisch medisch centrum	2016-12-3	n/a	major	Scaffold	full		100x			GCA_900093885.1	GCF_900093885.1	yes
NZ_FLYT01000123.1	692	100	100		scaffolds_20151359	Escherichia coli (E. coli)		562	SAMEA4350773	PRJEB14873	academisch medisch centrum	2016-12-3	n/a	major	Scaffold	full		100x			GCA_900093885.1	GCF_900093885.1	yes
NZ_FLYT01000124.1	682	99.85	100		scaffolds_20151359	Escherichia coli (E. coli)		562	SAMEA4350773	PRJEB14873	academisch medisch centrum	2016-12-3	n/a	major	Scaffold	full		100x			GCA_900093885.1	GCF_900093885.1	yes
NZ_FLYT01000131.1	633	100	100		scaffolds_20151359	Escherichia coli (E. coli)		562	SAMEA4350773	PRJEB14873	academisch medisch centrum	2016-12-3	n/a	major	Scaffold	full		100x			GCA_900093885.1	GCF_900093885.1	yes
NZ_FLYT01000133.1	613	100	100	WP_077251374.1	scaffolds_20151359	Escherichia coli (E. coli)		562	SAMEA4350773	PRJEB14873	academisch medisch centrum	2016-12-3	n/a	major	Scaffold	full		100x			GCA_900093885.1	GCF_900093885.1	yes
NZ_FLYT01000136.1	605	99.83	100	WP_077251376.1	scaffolds_20151359	Escherichia coli (E. coli)		562	SAMEA4350773	PRJEB14873	academisch medisch centrum	2016-12-3	n/a	major	Scaffold	full		100x			GCA_900093885.1	GCF_900093885.1	yes
NZ_FLYT01000138.1	596	99.16	100		scaffolds_20151359	Escherichia coli (E. coli)		562	SAMEA4350773	PRJEB14873	academisch medisch centrum	2016-12-3	n/a	major	Scaffold	full		100x			GCA_900093885.1	GCF_900093885.1	yes
NZ_FLYT01000140.1	581	99.83	100	WP_072800905.1	scaffolds_20151359	Escherichia coli (E. coli)		562	SAMEA4350773	PRJEB14873	academisch medisch centrum	2016-12-3	n/a	major	Scaffold	full		100x			GCA_900093885.1	GCF_900093885.1	yes
NZ_FLYT01000141.1	576	99.83	100	WP_077251377.1	scaffolds_20151359	Escherichia coli (E. coli)		562	SAMEA4350773	PRJEB14873	academisch medisch centrum	2016-12-3	n/a	major	Scaffold	full		100x			GCA_900093885.1	GCF_900093885.1	yes
NZ_FLYT01000146.1	551	99.82	100		scaffolds_20151359	Escherichia coli (E. coli)		562	SAMEA4350773	PRJEB14873	academisch medisch centrum	2016-12-3	n/a	major	Scaffold	full		100x			GCA_900093885.1	GCF_900093885.1	yes
NZ_FLYT01000149.1	517	99.81	100		scaffolds_20151359	Escherichia coli (E. coli)		562	SAMEA4350773	PRJEB14873	academisch medisch centrum	2016-12-3	n/a	major	Scaffold	full		100x			GCA_900093885.1	GCF_900093885.1	yes
NZ_FLYT01000150.1	515	99.42	100		scaffolds_20151359	Escherichia coli (E. coli)		562	SAMEA4350773	PRJEB14873	academisch medisch centrum	2016-12-3	n/a	major	Scaffold	full		100x			GCA_900093885.1	GCF_900093885.1	yes
NZ_FLYT01000152.1	500	100	100		scaffolds_20151359	Escherichia coli (E. coli)		562	SAMEA4350773	PRJEB14873	academisch medisch centrum	2016-12-3	n/a	major	Scaffold	full		100x			GCA_900093885.1	GCF_900093885.1	yes
NZ_FLYT01000154.1	484	99.59	100	WP_072800921.1	scaffolds_20151359	Escherichia coli (E. coli)		562	SAMEA4350773	PRJEB14873	academisch medisch centrum	2016-12-3	n/a	major	Scaffold	full		100x			GCA_900093885.1	GCF_900093885.1	yes
NZ_FLYT01000155.1	476	99.58	100	WP_077251379.1	scaffolds_20151359	Escherichia coli (E. coli)		562	SAMEA4350773	PRJEB14873	academisch medisch centrum	2016-12-3	n/a	major	Scaffold	full		100x			GCA_900093885.1	GCF_900093885.1	yes
NZ_FLYT01000158.1	464	100	100		scaffolds_20151359	Escherichia coli (E. coli)		562	SAMEA4350773	PRJEB14873	academisch medisch centrum	2016-12-3	n/a	major	Scaffold	full		100x			GCA_900093885.1	GCF_900093885.1	yes
NZ_FLYT01000160.1	460	99.78	100		scaffolds_20151359	Escherichia coli (E. coli)		562	SAMEA4350773	PRJEB14873	academisch medisch centrum	2016-12-3	n/a	major	Scaffold	full		100x			GCA_900093885.1	GCF_900093885.1	yes
NZ_FLYT01000161.1	459	99.78	100		scaffolds_20151359	Escherichia coli (E. coli)		562	SAMEA4350773	PRJEB14873	academisch medisch centrum	2016-12-3	n/a	major	Scaffold	full		100x			GCA_900093885.1	GCF_900093885.1	yes
NZ_FLYT01000162.1	451	99.78	100		scaffolds_20151359	Escherichia coli (E. coli)		562	SAMEA4350773	PRJEB14873	academisch medisch centrum	2016-12-3	n/a	major	Scaffold	full		100x			GCA_900093885.1	GCF_900093885.1	yes
NZ_FLYT01000164.1	445	100	100	WP_077251380.1	scaffolds_20151359	Escherichia coli (E. coli)		562	SAMEA4350773	PRJEB14873	academisch medisch centrum	2016-12-3	n/a	major	Scaffold	full		100x			GCA_900093885.1	GCF_900093885.1	yes
NZ_FLYT01000165.1	441	100	100		scaffolds_20151359	Escherichia coli (E. coli)		562	SAMEA4350773	PRJEB14873	academisch medisch centrum	2016-12-3	n/a	major	Scaffold	full		100x			GCA_900093885.1	GCF_900093885.1	yes
NZ_FLYT01000166.1	440	100	100	WP_072800927.1	scaffolds_20151359	Escherichia coli (E. coli)		562	SAMEA4350773	PRJEB14873	academisch medisch centrum	2016-12-3	n/a	major	Scaffold	full		100x			GCA_900093885.1	GCF_900093885.1	yes
NZ_FLYT01000167.1	439	99.77	100		scaffolds_20151359	Escherichia coli (E. coli)		562	SAMEA4350773	PRJEB14873	academisch medisch centrum	2016-12-3	n/a	major	Scaffold	full		100x			GCA_900093885.1	GCF_900093885.1	yes
NZ_FLYT01000168.1	438	99.77	100		scaffolds_20151359	Escherichia coli (E. coli)		562	SAMEA4350773	PRJEB14873	academisch medisch centrum	2016-12-3	n/a	major	Scaffold	full		100x			GCA_900093885.1	GCF_900093885.1	yes
NZ_FLYT01000169.1	437	100	100		scaffolds_20151359	Escherichia coli (E. coli)		562	SAMEA4350773	PRJEB14873	academisch medisch centrum	2016-12-3	n/a	major	Scaffold	full		100x			GCA_900093885.1	GCF_900093885.1	yes
NZ_FLYT01000172.1	426	100	100		scaffolds_20151359	Escherichia coli (E. coli)		562	SAMEA4350773	PRJEB14873	academisch medisch centrum	2016-12-3	n/a	major	Scaffold	full		100x			GCA_900093885.1	GCF_900093885.1	yes
NZ_FLYT01000174.1	417	100	100	WP_072800929.1	scaffolds_20151359	Escherichia coli (E. coli)		562	SAMEA4350773	PRJEB14873	academisch medisch centrum	2016-12-3	n/a	major	Scaffold	full		100x			GCA_900093885.1	GCF_900093885.1	yes
NZ_FLYT01000175.1	416	99.52	100		scaffolds_20151359	Escherichia coli (E. coli)		562	SAMEA4350773	PRJEB14873	academisch medisch centrum	2016-12-3	n/a	major	Scaffold	full		100x			GCA_900093885.1	GCF_900093885.1	yes
NZ_FLYT01000176.1	413	99.76	100		scaffolds_20151359	Escherichia coli (E. coli)		562	SAMEA4350773	PRJEB14873	academisch medisch centrum	2016-12-3	n/a	major	Scaffold	full		100x			GCA_900093885.1	GCF_900093885.1	yes
NZ_FLYT01000177.1	411	100	100		scaffolds_20151359	Escherichia coli (E. coli)		562	SAMEA4350773	PRJEB14873	academisch medisch centrum	2016-12-3	n/a	major	Scaffold	full		100x			GCA_900093885.1	GCF_900093885.1	yes
NZ_FLYT01000178.1	411	99.76	100		scaffolds_20151359	Escherichia coli (E. coli)		562	SAMEA4350773	PRJEB14873	academisch medisch centrum	2016-12-3	n/a	major	Scaffold	full		100x			GCA_900093885.1	GCF_900093885.1	yes
NZ_FLYT01000179.1	411	100	100		scaffolds_20151359	Escherichia coli (E. coli)		562	SAMEA4350773	PRJEB14873	academisch medisch centrum	2016-12-3	n/a	major	Scaffold	full		100x			GCA_900093885.1	GCF_900093885.1	yes
NZ_FLYT01000180.1	408	99.75	100	WP_072800931.1	scaffolds_20151359	Escherichia coli (E. coli)		562	SAMEA4350773	PRJEB14873	academisch medisch centrum	2016-12-3	n/a	major	Scaffold	full		100x			GCA_900093885.1	GCF_900093885.1	yes
NZ_FLYT01000181.1	408	100	99.51		scaffolds_20151359	Escherichia coli (E. coli)		562	SAMEA4350773	PRJEB14873	academisch medisch centrum	2016-12-3	n/a	major	Scaffold	full		100x			GCA_900093885.1	GCF_900093885.1	yes
NZ_FLYT01000182.1	408	100	100		scaffolds_20151359	Escherichia coli (E. coli)		562	SAMEA4350773	PRJEB14873	academisch medisch centrum	2016-12-3	n/a	major	Scaffold	full		100x			GCA_900093885.1	GCF_900093885.1	yes
NZ_FLYT01000184.1	406	100	100		scaffolds_20151359	Escherichia coli (E. coli)		562	SAMEA4350773	PRJEB14873	academisch medisch centrum	2016-12-3	n/a	major	Scaffold	full		100x			GCA_900093885.1	GCF_900093885.1	yes
NZ_FLYT01000185.1	403	100	100		scaffolds_20151359	Escherichia coli (E. coli)		562	SAMEA4350773	PRJEB14873	academisch medisch centrum	2016-12-3	n/a	major	Scaffold	full		100x			GCA_900093885.1	GCF_900093885.1	yes
NZ_FLYT01000187.1	399	100	100		scaffolds_20151359	Escherichia coli (E. coli)		562	SAMEA4350773	PRJEB14873	academisch medisch centrum	2016-12-3	n/a	major	Scaffold	full		100x			GCA_900093885.1	GCF_900093885.1	yes
NZ_FLYT01000188.1	398	99.75	100		scaffolds_20151359	Escherichia coli (E. coli)		562	SAMEA4350773	PRJEB14873	academisch medisch centrum	2016-12-3	n/a	major	Scaffold	full		100x			GCA_900093885.1	GCF_900093885.1	yes
NZ_FLYT01000189.1	397	100	100		scaffolds_20151359	Escherichia coli (E. coli)		562	SAMEA4350773	PRJEB14873	academisch medisch centrum	2016-12-3	n/a	major	Scaffold	full		100x			GCA_900093885.1	GCF_900093885.1	yes
NZ_FLYT01000190.1	397	99.75	100		scaffolds_20151359	Escherichia coli (E. coli)		562	SAMEA4350773	PRJEB14873	academisch medisch centrum	2016-12-3	n/a	major	Scaffold	full		100x			GCA_900093885.1	GCF_900093885.1	yes
NZ_FLYT01000191.1	395	100	100		scaffolds_20151359	Escherichia coli (E. coli)		562	SAMEA4350773	PRJEB14873	academisch medisch centrum	2016-12-3	n/a	major	Scaffold	full		100x			GCA_900093885.1	GCF_900093885.1	yes
NZ_FLYT01000192.1	395	99.49	100		scaffolds_20151359	Escherichia coli (E. coli)		562	SAMEA4350773	PRJEB14873	academisch medisch centrum	2016-12-3	n/a	major	Scaffold	full		100x			GCA_900093885.1	GCF_900093885.1	yes
NZ_FLYT01000194.1	392	100	100		scaffolds_20151359	Escherichia coli (E. coli)		562	SAMEA4350773	PRJEB14873	academisch medisch centrum	2016-12-3	n/a	major	Scaffold	full		100x			GCA_900093885.1	GCF_900093885.1	yes
NZ_FLYT01000195.1	392	99.75	100		scaffolds_20151359	Escherichia coli (E. coli)		562	SAMEA4350773	PRJEB14873	academisch medisch centrum	2016-12-3	n/a	major	Scaffold	full		100x			GCA_900093885.1	GCF_900093885.1	yes
NZ_FLYT01000196.1	390	99.74	100		scaffolds_20151359	Escherichia coli (E. coli)		562	SAMEA4350773	PRJEB14873	academisch medisch centrum	2016-12-3	n/a	major	Scaffold	full		100x			GCA_900093885.1	GCF_900093885.1	yes
NZ_FLYT01000197.1	389	99.49	100		scaffolds_20151359	Escherichia coli (E. coli)		562	SAMEA4350773	PRJEB14873	academisch medisch centrum	2016-12-3	n/a	major	Scaffold	full		100x			GCA_900093885.1	GCF_900093885.1	yes
NZ_FLYT01000198.1	386	99.48	100	WP_077251381.1	scaffolds_20151359	Escherichia coli (E. coli)		562	SAMEA4350773	PRJEB14873	academisch medisch centrum	2016-12-3	n/a	major	Scaffold	full		100x			GCA_900093885.1	GCF_900093885.1	yes
NZ_FLYT01000199.1	382	100	100		scaffolds_20151359	Escherichia coli (E. coli)		562	SAMEA4350773	PRJEB14873	academisch medisch centrum	2016-12-3	n/a	major	Scaffold	full		100x			GCA_900093885.1	GCF_900093885.1	yes
NZ_FLYT01000200.1	381	99.48	100		scaffolds_20151359	Escherichia coli (E. coli)		562	SAMEA4350773	PRJEB14873	academisch medisch centrum	2016-12-3	n/a	major	Scaffold	full		100x			GCA_900093885.1	GCF_900093885.1	yes
NZ_FLYT01000202.1	380	100	100	WP_077251382.1	scaffolds_20151359	Escherichia coli (E. coli)		562	SAMEA4350773	PRJEB14873	academisch medisch centrum	2016-12-3	n/a	major	Scaffold	full		100x			GCA_900093885.1	GCF_900093885.1	yes
NZ_FLYT01000203.1	379	99.74	100	WP_077251383.1	scaffolds_20151359	Escherichia coli (E. coli)		562	SAMEA4350773	PRJEB14873	academisch medisch centrum	2016-12-3	n/a	major	Scaffold	full		100x			GCA_900093885.1	GCF_900093885.1	yes
NZ_FLYT01000204.1	377	100	100		scaffolds_20151359	Escherichia coli (E. coli)		562	SAMEA4350773	PRJEB14873	academisch medisch centrum	2016-12-3	n/a	major	Scaffold	full		100x			GCA_900093885.1	GCF_900093885.1	yes
NZ_FLYT01000205.1	374	100	100		scaffolds_20151359	Escherichia coli (E. coli)		562	SAMEA4350773	PRJEB14873	academisch medisch centrum	2016-12-3	n/a	major	Scaffold	full		100x			GCA_900093885.1	GCF_900093885.1	yes
NZ_FLYT01000207.1	370	100	100	WP_077251384.1	scaffolds_20151359	Escherichia coli (E. coli)		562	SAMEA4350773	PRJEB14873	academisch medisch centrum	2016-12-3	n/a	major	Scaffold	full		100x			GCA_900093885.1	GCF_900093885.1	yes
NZ_FLYT01000208.1	370	100	100	WP_072800937.1	scaffolds_20151359	Escherichia coli (E. coli)		562	SAMEA4350773	PRJEB14873	academisch medisch centrum	2016-12-3	n/a	major	Scaffold	full		100x			GCA_900093885.1	GCF_900093885.1	yes
NZ_FLYT01000209.1	370	100	100	WP_077251385.1	scaffolds_20151359	Escherichia coli (E. coli)		562	SAMEA4350773	PRJEB14873	academisch medisch centrum	2016-12-3	n/a	major	Scaffold	full		100x			GCA_900093885.1	GCF_900093885.1	yes
NZ_FLYT01000210.1	368	100	100		scaffolds_20151359	Escherichia coli (E. coli)		562	SAMEA4350773	PRJEB14873	academisch medisch centrum	2016-12-3	n/a	major	Scaffold	full		100x			GCA_900093885.1	GCF_900093885.1	yes
NZ_FLYT01000212.1	364	99.73	100	WP_072800939.1	scaffolds_20151359	Escherichia coli (E. coli)		562	SAMEA4350773	PRJEB14873	academisch medisch centrum	2016-12-3	n/a	major	Scaffold	full		100x			GCA_900093885.1	GCF_900093885.1	yes
NZ_FLYT01000213.1	362	99.45	100		scaffolds_20151359	Escherichia coli (E. coli)		562	SAMEA4350773	PRJEB14873	academisch medisch centrum	2016-12-3	n/a	major	Scaffold	full		100x			GCA_900093885.1	GCF_900093885.1	yes
NZ_FLYT01000214.1	360	100	100		scaffolds_20151359	Escherichia coli (E. coli)		562	SAMEA4350773	PRJEB14873	academisch medisch centrum	2016-12-3	n/a	major	Scaffold	full		100x			GCA_900093885.1	GCF_900093885.1	yes
NZ_FLYT01000216.1	360	100	100	WP_072800940.1	scaffolds_20151359	Escherichia coli (E. coli)		562	SAMEA4350773	PRJEB14873	academisch medisch centrum	2016-12-3	n/a	major	Scaffold	full		100x			GCA_900093885.1	GCF_900093885.1	yes
NZ_FLYT01000217.1	358	100	100		scaffolds_20151359	Escherichia coli (E. coli)		562	SAMEA4350773	PRJEB14873	academisch medisch centrum	2016-12-3	n/a	major	Scaffold	full		100x			GCA_900093885.1	GCF_900093885.1	yes
NZ_FLYT01000223.1	352	100	100		scaffolds_20151359	Escherichia coli (E. coli)		562	SAMEA4350773	PRJEB14873	academisch medisch centrum	2016-12-3	n/a	major	Scaffold	full		100x			GCA_900093885.1	GCF_900093885.1	yes
NZ_FLYT01000224.1	351	99.72	100		scaffolds_20151359	Escherichia coli (E. coli)		562	SAMEA4350773	PRJEB14873	academisch medisch centrum	2016-12-3	n/a	major	Scaffold	full		100x			GCA_900093885.1	GCF_900093885.1	yes
NZ_FLYT01000226.1	350	99.71	100		scaffolds_20151359	Escherichia coli (E. coli)		562	SAMEA4350773	PRJEB14873	academisch medisch centrum	2016-12-3	n/a	major	Scaffold	full		100x			GCA_900093885.1	GCF_900093885.1	yes
NZ_FLYT01000227.1	348	99.71	100		scaffolds_20151359	Escherichia coli (E. coli)		562	SAMEA4350773	PRJEB14873	academisch medisch centrum	2016-12-3	n/a	major	Scaffold	full		100x			GCA_900093885.1	GCF_900093885.1	yes
NZ_FLYT01000228.1	346	100	100		scaffolds_20151359	Escherichia coli (E. coli)		562	SAMEA4350773	PRJEB14873	academisch medisch centrum	2016-12-3	n/a	major	Scaffold	full		100x			GCA_900093885.1	GCF_900093885.1	yes
NZ_FLYT01000229.1	345	100	100	WP_072800942.1	scaffolds_20151359	Escherichia coli (E. coli)		562	SAMEA4350773	PRJEB14873	academisch medisch centrum	2016-12-3	n/a	major	Scaffold	full		100x			GCA_900093885.1	GCF_900093885.1	yes
NZ_FLYT01000231.1	345	98.85	100		scaffolds_20151359	Escherichia coli (E. coli)		562	SAMEA4350773	PRJEB14873	academisch medisch centrum	2016-12-3	n/a	major	Scaffold	full		100x			GCA_900093885.1	GCF_900093885.1	yes
NZ_FLYT01000232.1	343	100	100		scaffolds_20151359	Escherichia coli (E. coli)		562	SAMEA4350773	PRJEB14873	academisch medisch centrum	2016-12-3	n/a	major	Scaffold	full		100x			GCA_900093885.1	GCF_900093885.1	yes
NZ_FLYT01000233.1	343	100	100		scaffolds_20151359	Escherichia coli (E. coli)		562	SAMEA4350773	PRJEB14873	academisch medisch centrum	2016-12-3	n/a	major	Scaffold	full		100x			GCA_900093885.1	GCF_900093885.1	yes
NZ_FLYT01000234.1	342	100	100		scaffolds_20151359	Escherichia coli (E. coli)		562	SAMEA4350773	PRJEB14873	academisch medisch centrum	2016-12-3	n/a	major	Scaffold	full		100x			GCA_900093885.1	GCF_900093885.1	yes
NZ_FLYT01000235.1	342	100	100		scaffolds_20151359	Escherichia coli (E. coli)		562	SAMEA4350773	PRJEB14873	academisch medisch centrum	2016-12-3	n/a	major	Scaffold	full		100x			GCA_900093885.1	GCF_900093885.1	yes
NZ_FLYT01000236.1	340	99.71	100		scaffolds_20151359	Escherichia coli (E. coli)		562	SAMEA4350773	PRJEB14873	academisch medisch centrum	2016-12-3	n/a	major	Scaffold	full		100x			GCA_900093885.1	GCF_900093885.1	yes
NZ_FLYT01000237.1	340	98.08	91.76		scaffolds_20151359	Escherichia coli (E. coli)		562	SAMEA4350773	PRJEB14873	academisch medisch centrum	2016-12-3	n/a	major	Scaffold	full		100x			GCA_900093885.1	GCF_900093885.1	yes
NZ_FLYT01000238.1	339	100	100		scaffolds_20151359	Escherichia coli (E. coli)		562	SAMEA4350773	PRJEB14873	academisch medisch centrum	2016-12-3	n/a	major	Scaffold	full		100x			GCA_900093885.1	GCF_900093885.1	yes
NZ_FLYT01000239.1	339	100	100		scaffolds_20151359	Escherichia coli (E. coli)		562	SAMEA4350773	PRJEB14873	academisch medisch centrum	2016-12-3	n/a	major	Scaffold	full		100x			GCA_900093885.1	GCF_900093885.1	yes
NZ_FLYT01000240.1	338	99.41	100		scaffolds_20151359	Escherichia coli (E. coli)		562	SAMEA4350773	PRJEB14873	academisch medisch centrum	2016-12-3	n/a	major	Scaffold	full		100x			GCA_900093885.1	GCF_900093885.1	yes
NZ_FLYT01000241.1	338	97.34	100		scaffolds_20151359	Escherichia coli (E. coli)		562	SAMEA4350773	PRJEB14873	academisch medisch centrum	2016-12-3	n/a	major	Scaffold	full		100x			GCA_900093885.1	GCF_900093885.1	yes
NZ_FLYT01000243.1	334	100	99.7	WP_077251387.1	scaffolds_20151359	Escherichia coli (E. coli)		562	SAMEA4350773	PRJEB14873	academisch medisch centrum	2016-12-3	n/a	major	Scaffold	full		100x			GCA_900093885.1	GCF_900093885.1	yes
NZ_FLYT01000244.1	334	100	100	WP_072800945.1	scaffolds_20151359	Escherichia coli (E. coli)		562	SAMEA4350773	PRJEB14873	academisch medisch centrum	2016-12-3	n/a	major	Scaffold	full		100x			GCA_900093885.1	GCF_900093885.1	yes
NZ_FLYT01000245.1	333	100	100		scaffolds_20151359	Escherichia coli (E. coli)		562	SAMEA4350773	PRJEB14873	academisch medisch centrum	2016-12-3	n/a	major	Scaffold	full		100x			GCA_900093885.1	GCF_900093885.1	yes
NZ_FLYT01000246.1	332	97.59	100		scaffolds_20151359	Escherichia coli (E. coli)		562	SAMEA4350773	PRJEB14873	academisch medisch centrum	2016-12-3	n/a	major	Scaffold	full		100x			GCA_900093885.1	GCF_900093885.1	yes
NZ_FLYT01000247.1	331	100	100		scaffolds_20151359	Escherichia coli (E. coli)		562	SAMEA4350773	PRJEB14873	academisch medisch centrum	2016-12-3	n/a	major	Scaffold	full		100x			GCA_900093885.1	GCF_900093885.1	yes
NZ_FLYT01000248.1	329	100	100		scaffolds_20151359	Escherichia coli (E. coli)		562	SAMEA4350773	PRJEB14873	academisch medisch centrum	2016-12-3	n/a	major	Scaffold	full		100x			GCA_900093885.1	GCF_900093885.1	yes
NZ_FLYT01000249.1	328	100	100		scaffolds_20151359	Escherichia coli (E. coli)		562	SAMEA4350773	PRJEB14873	academisch medisch centrum	2016-12-3	n/a	major	Scaffold	full		100x			GCA_900093885.1	GCF_900093885.1	yes
NZ_FLYT01000250.1	327	99.7	100		scaffolds_20151359	Escherichia coli (E. coli)		562	SAMEA4350773	PRJEB14873	academisch medisch centrum	2016-12-3	n/a	major	Scaffold	full		100x			GCA_900093885.1	GCF_900093885.1	yes
NZ_FLYT01000251.1	327	100	100		scaffolds_20151359	Escherichia coli (E. coli)		562	SAMEA4350773	PRJEB14873	academisch medisch centrum	2016-12-3	n/a	major	Scaffold	full		100x			GCA_900093885.1	GCF_900093885.1	yes
NZ_FLYT01000252.1	326	99.69	100		scaffolds_20151359	Escherichia coli (E. coli)		562	SAMEA4350773	PRJEB14873	academisch medisch centrum	2016-12-3	n/a	major	Scaffold	full		100x			GCA_900093885.1	GCF_900093885.1	yes
NZ_FLYT01000253.1	325	99.38	100		scaffolds_20151359	Escherichia coli (E. coli)		562	SAMEA4350773	PRJEB14873	academisch medisch centrum	2016-12-3	n/a	major	Scaffold	full		100x			GCA_900093885.1	GCF_900093885.1	yes
NZ_FLYT01000255.1	325	99.38	100	WP_077251388.1	scaffolds_20151359	Escherichia coli (E. coli)		562	SAMEA4350773	PRJEB14873	academisch medisch centrum	2016-12-3	n/a	major	Scaffold	full		100x			GCA_900093885.1	GCF_900093885.1	yes
NZ_FLYT01000256.1	323	100	100		scaffolds_20151359	Escherichia coli (E. coli)		562	SAMEA4350773	PRJEB14873	academisch medisch centrum	2016-12-3	n/a	major	Scaffold	full		100x			GCA_900093885.1	GCF_900093885.1	yes
NZ_FLYT01000257.1	322	100	100		scaffolds_20151359	Escherichia coli (E. coli)		562	SAMEA4350773	PRJEB14873	academisch medisch centrum	2016-12-3	n/a	major	Scaffold	full		100x			GCA_900093885.1	GCF_900093885.1	yes
NZ_FLYT01000258.1	321	100	100		scaffolds_20151359	Escherichia coli (E. coli)		562	SAMEA4350773	PRJEB14873	academisch medisch centrum	2016-12-3	n/a	major	Scaffold	full		100x			GCA_900093885.1	GCF_900093885.1	yes
NZ_FLYT01000259.1	321	100	100		scaffolds_20151359	Escherichia coli (E. coli)		562	SAMEA4350773	PRJEB14873	academisch medisch centrum	2016-12-3	n/a	major	Scaffold	full		100x			GCA_900093885.1	GCF_900093885.1	yes
NZ_FLYT01000260.1	320	99.69	100		scaffolds_20151359	Escherichia coli (E. coli)		562	SAMEA4350773	PRJEB14873	academisch medisch centrum	2016-12-3	n/a	major	Scaffold	full		100x			GCA_900093885.1	GCF_900093885.1	yes
NZ_FLYT01000261.1	319	99.38	100		scaffolds_20151359	Escherichia coli (E. coli)		562	SAMEA4350773	PRJEB14873	academisch medisch centrum	2016-12-3	n/a	major	Scaffold	full		100x			GCA_900093885.1	GCF_900093885.1	yes
NZ_FLYT01000264.1	318	99.69	100		scaffolds_20151359	Escherichia coli (E. coli)		562	SAMEA4350773	PRJEB14873	academisch medisch centrum	2016-12-3	n/a	major	Scaffold	full		100x			GCA_900093885.1	GCF_900093885.1	yes
NZ_FLYT01000267.1	315	100	100		scaffolds_20151359	Escherichia coli (E. coli)		562	SAMEA4350773	PRJEB14873	academisch medisch centrum	2016-12-3	n/a	major	Scaffold	full		100x			GCA_900093885.1	GCF_900093885.1	yes
NZ_FLYT01000268.1	314	100	100		scaffolds_20151359	Escherichia coli (E. coli)		562	SAMEA4350773	PRJEB14873	academisch medisch centrum	2016-12-3	n/a	major	Scaffold	full		100x			GCA_900093885.1	GCF_900093885.1	yes
NZ_FLYT01000269.1	314	99.68	100		scaffolds_20151359	Escherichia coli (E. coli)		562	SAMEA4350773	PRJEB14873	academisch medisch centrum	2016-12-3	n/a	major	Scaffold	full		100x			GCA_900093885.1	GCF_900093885.1	yes
NZ_FLYT01000272.1	313	100	100		scaffolds_20151359	Escherichia coli (E. coli)		562	SAMEA4350773	PRJEB14873	academisch medisch centrum	2016-12-3	n/a	major	Scaffold	full		100x			GCA_900093885.1	GCF_900093885.1	yes
NZ_FLYT01000273.1	311	100	100		scaffolds_20151359	Escherichia coli (E. coli)		562	SAMEA4350773	PRJEB14873	academisch medisch centrum	2016-12-3	n/a	major	Scaffold	full		100x			GCA_900093885.1	GCF_900093885.1	yes
NZ_FLYT01000274.1	310	100	100		scaffolds_20151359	Escherichia coli (E. coli)		562	SAMEA4350773	PRJEB14873	academisch medisch centrum	2016-12-3	n/a	major	Scaffold	full		100x			GCA_900093885.1	GCF_900093885.1	yes
NZ_FLYT01000275.1	309	99.68	100		scaffolds_20151359	Escherichia coli (E. coli)		562	SAMEA4350773	PRJEB14873	academisch medisch centrum	2016-12-3	n/a	major	Scaffold	full		100x			GCA_900093885.1	GCF_900093885.1	yes
NZ_FLYT01000276.1	309	100	100		scaffolds_20151359	Escherichia coli (E. coli)		562	SAMEA4350773	PRJEB14873	academisch medisch centrum	2016-12-3	n/a	major	Scaffold	full		100x			GCA_900093885.1	GCF_900093885.1	yes
NZ_FLYT01000277.1	309	100	99.68		scaffolds_20151359	Escherichia coli (E. coli)		562	SAMEA4350773	PRJEB14873	academisch medisch centrum	2016-12-3	n/a	major	Scaffold	full		100x			GCA_900093885.1	GCF_900093885.1	yes
NZ_FLYT01000278.1	309	99.68	100	WP_072800949.1	scaffolds_20151359	Escherichia coli (E. coli)		562	SAMEA4350773	PRJEB14873	academisch medisch centrum	2016-12-3	n/a	major	Scaffold	full		100x			GCA_900093885.1	GCF_900093885.1	yes
NZ_FLYT01000279.1	308	100	100		scaffolds_20151359	Escherichia coli (E. coli)		562	SAMEA4350773	PRJEB14873	academisch medisch centrum	2016-12-3	n/a	major	Scaffold	full		100x			GCA_900093885.1	GCF_900093885.1	yes
NZ_FLYT01000280.1	307	100	100		scaffolds_20151359	Escherichia coli (E. coli)		562	SAMEA4350773	PRJEB14873	academisch medisch centrum	2016-12-3	n/a	major	Scaffold	full		100x			GCA_900093885.1	GCF_900093885.1	yes
NZ_FLYT01000281.1	306	100	100		scaffolds_20151359	Escherichia coli (E. coli)		562	SAMEA4350773	PRJEB14873	academisch medisch centrum	2016-12-3	n/a	major	Scaffold	full		100x			GCA_900093885.1	GCF_900093885.1	yes
NZ_FLYT01000282.1	306	99.35	100		scaffolds_20151359	Escherichia coli (E. coli)		562	SAMEA4350773	PRJEB14873	academisch medisch centrum	2016-12-3	n/a	major	Scaffold	full		100x			GCA_900093885.1	GCF_900093885.1	yes
NZ_FLYT01000283.1	305	100	100		scaffolds_20151359	Escherichia coli (E. coli)		562	SAMEA4350773	PRJEB14873	academisch medisch centrum	2016-12-3	n/a	major	Scaffold	full		100x			GCA_900093885.1	GCF_900093885.1	yes
NZ_FLYT01000285.1	304	100	100	WP_077251389.1	scaffolds_20151359	Escherichia coli (E. coli)		562	SAMEA4350773	PRJEB14873	academisch medisch centrum	2016-12-3	n/a	major	Scaffold	full		100x			GCA_900093885.1	GCF_900093885.1	yes
NZ_FLYT01000286.1	300	100	100	WP_077251390.1	scaffolds_20151359	Escherichia coli (E. coli)		562	SAMEA4350773	PRJEB14873	academisch medisch centrum	2016-12-3	n/a	major	Scaffold	full		100x			GCA_900093885.1	GCF_900093885.1	yes
NZ_FLYT01000287.1	299	99.67	100		scaffolds_20151359	Escherichia coli (E. coli)		562	SAMEA4350773	PRJEB14873	academisch medisch centrum	2016-12-3	n/a	major	Scaffold	full		100x			GCA_900093885.1	GCF_900093885.1	yes
NZ_FLYT01000288.1	299	99.67	100		scaffolds_20151359	Escherichia coli (E. coli)		562	SAMEA4350773	PRJEB14873	academisch medisch centrum	2016-12-3	n/a	major	Scaffold	full		100x			GCA_900093885.1	GCF_900093885.1	yes
NZ_FLYT01000289.1	299	99.67	100		scaffolds_20151359	Escherichia coli (E. coli)		562	SAMEA4350773	PRJEB14873	academisch medisch centrum	2016-12-3	n/a	major	Scaffold	full		100x			GCA_900093885.1	GCF_900093885.1	yes
NZ_FLYT01000292.1	297	100	100		scaffolds_20151359	Escherichia coli (E. coli)		562	SAMEA4350773	PRJEB14873	academisch medisch centrum	2016-12-3	n/a	major	Scaffold	full		100x			GCA_900093885.1	GCF_900093885.1	yes
NZ_FLYT01000294.1	295	100	100		scaffolds_20151359	Escherichia coli (E. coli)		562	SAMEA4350773	PRJEB14873	academisch medisch centrum	2016-12-3	n/a	major	Scaffold	full		100x			GCA_900093885.1	GCF_900093885.1	yes
NZ_FLYT01000296.1	292	99.66	100		scaffolds_20151359	Escherichia coli (E. coli)		562	SAMEA4350773	PRJEB14873	academisch medisch centrum	2016-12-3	n/a	major	Scaffold	full		100x			GCA_900093885.1	GCF_900093885.1	yes
NZ_FLYT01000297.1	290	99.66	100		scaffolds_20151359	Escherichia coli (E. coli)		562	SAMEA4350773	PRJEB14873	academisch medisch centrum	2016-12-3	n/a	major	Scaffold	full		100x			GCA_900093885.1	GCF_900093885.1	yes
NZ_FLYT01000299.1	290	99.66	100	WP_072800951.1	scaffolds_20151359	Escherichia coli (E. coli)		562	SAMEA4350773	PRJEB14873	academisch medisch centrum	2016-12-3	n/a	major	Scaffold	full		100x			GCA_900093885.1	GCF_900093885.1	yes
NZ_FLYT01000301.1	288	100	100		scaffolds_20151359	Escherichia coli (E. coli)		562	SAMEA4350773	PRJEB14873	academisch medisch centrum	2016-12-3	n/a	major	Scaffold	full		100x			GCA_900093885.1	GCF_900093885.1	yes
NZ_FLYT01000302.1	287	99.65	100		scaffolds_20151359	Escherichia coli (E. coli)		562	SAMEA4350773	PRJEB14873	academisch medisch centrum	2016-12-3	n/a	major	Scaffold	full		100x			GCA_900093885.1	GCF_900093885.1	yes
NZ_FLYT01000304.1	286	100	100		scaffolds_20151359	Escherichia coli (E. coli)		562	SAMEA4350773	PRJEB14873	academisch medisch centrum	2016-12-3	n/a	major	Scaffold	full		100x			GCA_900093885.1	GCF_900093885.1	yes
NZ_FLYT01000305.1	284	99.3	100		scaffolds_20151359	Escherichia coli (E. coli)		562	SAMEA4350773	PRJEB14873	academisch medisch centrum	2016-12-3	n/a	major	Scaffold	full		100x			GCA_900093885.1	GCF_900093885.1	yes
NZ_FLYT01000306.1	283	100	100		scaffolds_20151359	Escherichia coli (E. coli)		562	SAMEA4350773	PRJEB14873	academisch medisch centrum	2016-12-3	n/a	major	Scaffold	full		100x			GCA_900093885.1	GCF_900093885.1	yes
NZ_FLYT01000307.1	283	100	100		scaffolds_20151359	Escherichia coli (E. coli)		562	SAMEA4350773	PRJEB14873	academisch medisch centrum	2016-12-3	n/a	major	Scaffold	full		100x			GCA_900093885.1	GCF_900093885.1	yes
NZ_FLYT01000308.1	283	100	100		scaffolds_20151359	Escherichia coli (E. coli)		562	SAMEA4350773	PRJEB14873	academisch medisch centrum	2016-12-3	n/a	major	Scaffold	full		100x			GCA_900093885.1	GCF_900093885.1	yes
NZ_FLYT01000309.1	283	99.65	100		scaffolds_20151359	Escherichia coli (E. coli)		562	SAMEA4350773	PRJEB14873	academisch medisch centrum	2016-12-3	n/a	major	Scaffold	full		100x			GCA_900093885.1	GCF_900093885.1	yes
NZ_FLYT01000310.1	281	100	100	WP_072800956.1	scaffolds_20151359	Escherichia coli (E. coli)		562	SAMEA4350773	PRJEB14873	academisch medisch centrum	2016-12-3	n/a	major	Scaffold	full		100x			GCA_900093885.1	GCF_900093885.1	yes
NZ_FLYT01000311.1	280	99.64	100		scaffolds_20151359	Escherichia coli (E. coli)		562	SAMEA4350773	PRJEB14873	academisch medisch centrum	2016-12-3	n/a	major	Scaffold	full		100x			GCA_900093885.1	GCF_900093885.1	yes
NZ_FLYT01000312.1	280	99.64	100		scaffolds_20151359	Escherichia coli (E. coli)		562	SAMEA4350773	PRJEB14873	academisch medisch centrum	2016-12-3	n/a	major	Scaffold	full		100x			GCA_900093885.1	GCF_900093885.1	yes
NZ_FLYT01000313.1	279	100	100		scaffolds_20151359	Escherichia coli (E. coli)		562	SAMEA4350773	PRJEB14873	academisch medisch centrum	2016-12-3	n/a	major	Scaffold	full		100x			GCA_900093885.1	GCF_900093885.1	yes
NZ_FLYT01000314.1	279	100	100		scaffolds_20151359	Escherichia coli (E. coli)		562	SAMEA4350773	PRJEB14873	academisch medisch centrum	2016-12-3	n/a	major	Scaffold	full		100x			GCA_900093885.1	GCF_900093885.1	yes
NZ_FLYT01000316.1	278	100	100		scaffolds_20151359	Escherichia coli (E. coli)		562	SAMEA4350773	PRJEB14873	academisch medisch centrum	2016-12-3	n/a	major	Scaffold	full		100x			GCA_900093885.1	GCF_900093885.1	yes
NZ_FLYT01000317.1	275	100	100		scaffolds_20151359	Escherichia coli (E. coli)		562	SAMEA4350773	PRJEB14873	academisch medisch centrum	2016-12-3	n/a	major	Scaffold	full		100x			GCA_900093885.1	GCF_900093885.1	yes
NZ_FLYT01000319.1	273	100	100		scaffolds_20151359	Escherichia coli (E. coli)		562	SAMEA4350773	PRJEB14873	academisch medisch centrum	2016-12-3	n/a	major	Scaffold	full		100x			GCA_900093885.1	GCF_900093885.1	yes
NZ_FLYT01000320.1	273	100	100		scaffolds_20151359	Escherichia coli (E. coli)		562	SAMEA4350773	PRJEB14873	academisch medisch centrum	2016-12-3	n/a	major	Scaffold	full		100x			GCA_900093885.1	GCF_900093885.1	yes
NZ_FLYT01000321.1	273	100	100		scaffolds_20151359	Escherichia coli (E. coli)		562	SAMEA4350773	PRJEB14873	academisch medisch centrum	2016-12-3	n/a	major	Scaffold	full		100x			GCA_900093885.1	GCF_900093885.1	yes
NZ_FLYT01000322.1	272	99.63	100		scaffolds_20151359	Escherichia coli (E. coli)		562	SAMEA4350773	PRJEB14873	academisch medisch centrum	2016-12-3	n/a	major	Scaffold	full		100x			GCA_900093885.1	GCF_900093885.1	yes
NZ_FLYT01000323.1	271	100	100		scaffolds_20151359	Escherichia coli (E. coli)		562	SAMEA4350773	PRJEB14873	academisch medisch centrum	2016-12-3	n/a	major	Scaffold	full		100x			GCA_900093885.1	GCF_900093885.1	yes
NZ_FLYT01000324.1	271	100	100		scaffolds_20151359	Escherichia coli (E. coli)		562	SAMEA4350773	PRJEB14873	academisch medisch centrum	2016-12-3	n/a	major	Scaffold	full		100x			GCA_900093885.1	GCF_900093885.1	yes
NZ_FLYT01000326.1	270	99.63	100		scaffolds_20151359	Escherichia coli (E. coli)		562	SAMEA4350773	PRJEB14873	academisch medisch centrum	2016-12-3	n/a	major	Scaffold	full		100x			GCA_900093885.1	GCF_900093885.1	yes
NZ_FLYT01000327.1	270	99.26	100		scaffolds_20151359	Escherichia coli (E. coli)		562	SAMEA4350773	PRJEB14873	academisch medisch centrum	2016-12-3	n/a	major	Scaffold	full		100x			GCA_900093885.1	GCF_900093885.1	yes
NZ_FLYT01000328.1	269	100	100		scaffolds_20151359	Escherichia coli (E. coli)		562	SAMEA4350773	PRJEB14873	academisch medisch centrum	2016-12-3	n/a	major	Scaffold	full		100x			GCA_900093885.1	GCF_900093885.1	yes
NZ_FLYT01000329.1	269	100	100		scaffolds_20151359	Escherichia coli (E. coli)		562	SAMEA4350773	PRJEB14873	academisch medisch centrum	2016-12-3	n/a	major	Scaffold	full		100x			GCA_900093885.1	GCF_900093885.1	yes
NZ_FLYT01000330.1	269	100	100		scaffolds_20151359	Escherichia coli (E. coli)		562	SAMEA4350773	PRJEB14873	academisch medisch centrum	2016-12-3	n/a	major	Scaffold	full		100x			GCA_900093885.1	GCF_900093885.1	yes
NZ_FLYT01000331.1	269	100	100		scaffolds_20151359	Escherichia coli (E. coli)		562	SAMEA4350773	PRJEB14873	academisch medisch centrum	2016-12-3	n/a	major	Scaffold	full		100x			GCA_900093885.1	GCF_900093885.1	yes
NZ_FLYT01000332.1	267	99.63	100		scaffolds_20151359	Escherichia coli (E. coli)		562	SAMEA4350773	PRJEB14873	academisch medisch centrum	2016-12-3	n/a	major	Scaffold	full		100x			GCA_900093885.1	GCF_900093885.1	yes
NZ_FLYT01000333.1	267	100	100		scaffolds_20151359	Escherichia coli (E. coli)		562	SAMEA4350773	PRJEB14873	academisch medisch centrum	2016-12-3	n/a	major	Scaffold	full		100x			GCA_900093885.1	GCF_900093885.1	yes
NZ_FLYT01000334.1	266	100	100		scaffolds_20151359	Escherichia coli (E. coli)		562	SAMEA4350773	PRJEB14873	academisch medisch centrum	2016-12-3	n/a	major	Scaffold	full		100x			GCA_900093885.1	GCF_900093885.1	yes
NZ_FLYT01000335.1	266	99.62	100		scaffolds_20151359	Escherichia coli (E. coli)		562	SAMEA4350773	PRJEB14873	academisch medisch centrum	2016-12-3	n/a	major	Scaffold	full		100x			GCA_900093885.1	GCF_900093885.1	yes
NZ_FLYT01000336.1	265	100	100		scaffolds_20151359	Escherichia coli (E. coli)		562	SAMEA4350773	PRJEB14873	academisch medisch centrum	2016-12-3	n/a	major	Scaffold	full		100x			GCA_900093885.1	GCF_900093885.1	yes
NZ_FLYT01000338.1	264	99.62	100		scaffolds_20151359	Escherichia coli (E. coli)		562	SAMEA4350773	PRJEB14873	academisch medisch centrum	2016-12-3	n/a	major	Scaffold	full		100x			GCA_900093885.1	GCF_900093885.1	yes
NZ_FLYT01000339.1	264	100	100		scaffolds_20151359	Escherichia coli (E. coli)		562	SAMEA4350773	PRJEB14873	academisch medisch centrum	2016-12-3	n/a	major	Scaffold	full		100x			GCA_900093885.1	GCF_900093885.1	yes
NZ_FLYT01000341.1	262	99.24	100	WP_077251391.1	scaffolds_20151359	Escherichia coli (E. coli)		562	SAMEA4350773	PRJEB14873	academisch medisch centrum	2016-12-3	n/a	major	Scaffold	full		100x			GCA_900093885.1	GCF_900093885.1	yes
NZ_FLYT01000342.1	262	100	100		scaffolds_20151359	Escherichia coli (E. coli)		562	SAMEA4350773	PRJEB14873	academisch medisch centrum	2016-12-3	n/a	major	Scaffold	full		100x			GCA_900093885.1	GCF_900093885.1	yes
NZ_FLYT01000343.1	262	97.75	100		scaffolds_20151359	Escherichia coli (E. coli)		562	SAMEA4350773	PRJEB14873	academisch medisch centrum	2016-12-3	n/a	major	Scaffold	full		100x			GCA_900093885.1	GCF_900093885.1	yes
NZ_FLYT01000344.1	261	100	100		scaffolds_20151359	Escherichia coli (E. coli)		562	SAMEA4350773	PRJEB14873	academisch medisch centrum	2016-12-3	n/a	major	Scaffold	full		100x			GCA_900093885.1	GCF_900093885.1	yes
NZ_FLYT01000346.1	260	100	100		scaffolds_20151359	Escherichia coli (E. coli)		562	SAMEA4350773	PRJEB14873	academisch medisch centrum	2016-12-3	n/a	major	Scaffold	full		100x			GCA_900093885.1	GCF_900093885.1	yes
NZ_FLYT01000347.1	259	99.23	100		scaffolds_20151359	Escherichia coli (E. coli)		562	SAMEA4350773	PRJEB14873	academisch medisch centrum	2016-12-3	n/a	major	Scaffold	full		100x			GCA_900093885.1	GCF_900093885.1	yes
NZ_FLYT01000348.1	258	100	100		scaffolds_20151359	Escherichia coli (E. coli)		562	SAMEA4350773	PRJEB14873	academisch medisch centrum	2016-12-3	n/a	major	Scaffold	full		100x			GCA_900093885.1	GCF_900093885.1	yes
NZ_FLYT01000349.1	258	100	100		scaffolds_20151359	Escherichia coli (E. coli)		562	SAMEA4350773	PRJEB14873	academisch medisch centrum	2016-12-3	n/a	major	Scaffold	full		100x			GCA_900093885.1	GCF_900093885.1	yes
NZ_FLYT01000351.1	257	100	100		scaffolds_20151359	Escherichia coli (E. coli)		562	SAMEA4350773	PRJEB14873	academisch medisch centrum	2016-12-3	n/a	major	Scaffold	full		100x			GCA_900093885.1	GCF_900093885.1	yes
NZ_FLYT01000353.1	256	100	100		scaffolds_20151359	Escherichia coli (E. coli)		562	SAMEA4350773	PRJEB14873	academisch medisch centrum	2016-12-3	n/a	major	Scaffold	full		100x			GCA_900093885.1	GCF_900093885.1	yes
NZ_FLYT01000354.1	256	100	100		scaffolds_20151359	Escherichia coli (E. coli)		562	SAMEA4350773	PRJEB14873	academisch medisch centrum	2016-12-3	n/a	major	Scaffold	full		100x			GCA_900093885.1	GCF_900093885.1	yes
NZ_FLYT01000355.1	256	99.61	100		scaffolds_20151359	Escherichia coli (E. coli)		562	SAMEA4350773	PRJEB14873	academisch medisch centrum	2016-12-3	n/a	major	Scaffold	full		100x			GCA_900093885.1	GCF_900093885.1	yes
NZ_FLYT01000356.1	256	100	100		scaffolds_20151359	Escherichia coli (E. coli)		562	SAMEA4350773	PRJEB14873	academisch medisch centrum	2016-12-3	n/a	major	Scaffold	full		100x			GCA_900093885.1	GCF_900093885.1	yes
NZ_FLYT01000357.1	255	100	100		scaffolds_20151359	Escherichia coli (E. coli)		562	SAMEA4350773	PRJEB14873	academisch medisch centrum	2016-12-3	n/a	major	Scaffold	full		100x			GCA_900093885.1	GCF_900093885.1	yes
NZ_FLYT01000358.1	255	100	100		scaffolds_20151359	Escherichia coli (E. coli)		562	SAMEA4350773	PRJEB14873	academisch medisch centrum	2016-12-3	n/a	major	Scaffold	full		100x			GCA_900093885.1	GCF_900093885.1	yes
NZ_FLYT01000361.1	254	100	100		scaffolds_20151359	Escherichia coli (E. coli)		562	SAMEA4350773	PRJEB14873	academisch medisch centrum	2016-12-3	n/a	major	Scaffold	full		100x			GCA_900093885.1	GCF_900093885.1	yes
NZ_FLYT01000362.1	254	99.61	100		scaffolds_20151359	Escherichia coli (E. coli)		562	SAMEA4350773	PRJEB14873	academisch medisch centrum	2016-12-3	n/a	major	Scaffold	full		100x			GCA_900093885.1	GCF_900093885.1	yes
NZ_FLYT01000363.1	251	99.2	100		scaffolds_20151359	Escherichia coli (E. coli)		562	SAMEA4350773	PRJEB14873	academisch medisch centrum	2016-12-3	n/a	major	Scaffold	full		100x			GCA_900093885.1	GCF_900093885.1	yes
NZ_FLYT01000364.1	251	100	100		scaffolds_20151359	Escherichia coli (E. coli)		562	SAMEA4350773	PRJEB14873	academisch medisch centrum	2016-12-3	n/a	major	Scaffold	full		100x			GCA_900093885.1	GCF_900093885.1	yes
NZ_FLYT01000365.1	251	100	100		scaffolds_20151359	Escherichia coli (E. coli)		562	SAMEA4350773	PRJEB14873	academisch medisch centrum	2016-12-3	n/a	major	Scaffold	full		100x			GCA_900093885.1	GCF_900093885.1	yes
NZ_FLYT01000367.1	250	100	100		scaffolds_20151359	Escherichia coli (E. coli)		562	SAMEA4350773	PRJEB14873	academisch medisch centrum	2016-12-3	n/a	major	Scaffold	full		100x			GCA_900093885.1	GCF_900093885.1	yes
NZ_FLYT01000368.1	250	100	100		scaffolds_20151359	Escherichia coli (E. coli)		562	SAMEA4350773	PRJEB14873	academisch medisch centrum	2016-12-3	n/a	major	Scaffold	full		100x			GCA_900093885.1	GCF_900093885.1	yes
NZ_FLYT01000369.1	250	100	100		scaffolds_20151359	Escherichia coli (E. coli)		562	SAMEA4350773	PRJEB14873	academisch medisch centrum	2016-12-3	n/a	major	Scaffold	full		100x			GCA_900093885.1	GCF_900093885.1	yes
NZ_FLYT01000370.1	249	100	100		scaffolds_20151359	Escherichia coli (E. coli)		562	SAMEA4350773	PRJEB14873	academisch medisch centrum	2016-12-3	n/a	major	Scaffold	full		100x			GCA_900093885.1	GCF_900093885.1	yes
NZ_FLYT01000371.1	248	100	100		scaffolds_20151359	Escherichia coli (E. coli)		562	SAMEA4350773	PRJEB14873	academisch medisch centrum	2016-12-3	n/a	major	Scaffold	full		100x			GCA_900093885.1	GCF_900093885.1	yes
NZ_FLYT01000372.1	248	100	100		scaffolds_20151359	Escherichia coli (E. coli)		562	SAMEA4350773	PRJEB14873	academisch medisch centrum	2016-12-3	n/a	major	Scaffold	full		100x			GCA_900093885.1	GCF_900093885.1	yes
NZ_FLYT01000373.1	246	100	100		scaffolds_20151359	Escherichia coli (E. coli)		562	SAMEA4350773	PRJEB14873	academisch medisch centrum	2016-12-3	n/a	major	Scaffold	full		100x			GCA_900093885.1	GCF_900093885.1	yes
NZ_FLYT01000374.1	246	100	100		scaffolds_20151359	Escherichia coli (E. coli)		562	SAMEA4350773	PRJEB14873	academisch medisch centrum	2016-12-3	n/a	major	Scaffold	full		100x			GCA_900093885.1	GCF_900093885.1	yes
NZ_FLYT01000375.1	246	100	100		scaffolds_20151359	Escherichia coli (E. coli)		562	SAMEA4350773	PRJEB14873	academisch medisch centrum	2016-12-3	n/a	major	Scaffold	full		100x			GCA_900093885.1	GCF_900093885.1	yes
NZ_FLYT01000376.1	246	100	100		scaffolds_20151359	Escherichia coli (E. coli)		562	SAMEA4350773	PRJEB14873	academisch medisch centrum	2016-12-3	n/a	major	Scaffold	full		100x			GCA_900093885.1	GCF_900093885.1	yes
NZ_FLYT01000377.1	245	99.59	100		scaffolds_20151359	Escherichia coli (E. coli)		562	SAMEA4350773	PRJEB14873	academisch medisch centrum	2016-12-3	n/a	major	Scaffold	full		100x			GCA_900093885.1	GCF_900093885.1	yes
NZ_FLYT01000378.1	245	100	100		scaffolds_20151359	Escherichia coli (E. coli)		562	SAMEA4350773	PRJEB14873	academisch medisch centrum	2016-12-3	n/a	major	Scaffold	full		100x			GCA_900093885.1	GCF_900093885.1	yes
NZ_FLYT01000379.1	245	100	100		scaffolds_20151359	Escherichia coli (E. coli)		562	SAMEA4350773	PRJEB14873	academisch medisch centrum	2016-12-3	n/a	major	Scaffold	full		100x			GCA_900093885.1	GCF_900093885.1	yes
NZ_FLYT01000380.1	245	99.59	100		scaffolds_20151359	Escherichia coli (E. coli)		562	SAMEA4350773	PRJEB14873	academisch medisch centrum	2016-12-3	n/a	major	Scaffold	full		100x			GCA_900093885.1	GCF_900093885.1	yes
NZ_FLYT01000381.1	243	99.59	100		scaffolds_20151359	Escherichia coli (E. coli)		562	SAMEA4350773	PRJEB14873	academisch medisch centrum	2016-12-3	n/a	major	Scaffold	full		100x			GCA_900093885.1	GCF_900093885.1	yes
NZ_FLYT01000383.1	242	100	100		scaffolds_20151359	Escherichia coli (E. coli)		562	SAMEA4350773	PRJEB14873	academisch medisch centrum	2016-12-3	n/a	major	Scaffold	full		100x			GCA_900093885.1	GCF_900093885.1	yes
NZ_FLYT01000384.1	242	100	100		scaffolds_20151359	Escherichia coli (E. coli)		562	SAMEA4350773	PRJEB14873	academisch medisch centrum	2016-12-3	n/a	major	Scaffold	full		100x			GCA_900093885.1	GCF_900093885.1	yes
NZ_FLYT01000385.1	242	100	100		scaffolds_20151359	Escherichia coli (E. coli)		562	SAMEA4350773	PRJEB14873	academisch medisch centrum	2016-12-3	n/a	major	Scaffold	full		100x			GCA_900093885.1	GCF_900093885.1	yes
NZ_FLYT01000386.1	241	99.59	100		scaffolds_20151359	Escherichia coli (E. coli)		562	SAMEA4350773	PRJEB14873	academisch medisch centrum	2016-12-3	n/a	major	Scaffold	full		100x			GCA_900093885.1	GCF_900093885.1	yes
NZ_FLYT01000387.1	241	99.17	100		scaffolds_20151359	Escherichia coli (E. coli)		562	SAMEA4350773	PRJEB14873	academisch medisch centrum	2016-12-3	n/a	major	Scaffold	full		100x			GCA_900093885.1	GCF_900093885.1	yes
NZ_FLYT01000388.1	241	100	100		scaffolds_20151359	Escherichia coli (E. coli)		562	SAMEA4350773	PRJEB14873	academisch medisch centrum	2016-12-3	n/a	major	Scaffold	full		100x			GCA_900093885.1	GCF_900093885.1	yes
NZ_FLYT01000389.1	240	100	100		scaffolds_20151359	Escherichia coli (E. coli)		562	SAMEA4350773	PRJEB14873	academisch medisch centrum	2016-12-3	n/a	major	Scaffold	full		100x			GCA_900093885.1	GCF_900093885.1	yes
NZ_FLYT01000390.1	240	100	100		scaffolds_20151359	Escherichia coli (E. coli)		562	SAMEA4350773	PRJEB14873	academisch medisch centrum	2016-12-3	n/a	major	Scaffold	full		100x			GCA_900093885.1	GCF_900093885.1	yes
NZ_FLYT01000391.1	240	99.58	100		scaffolds_20151359	Escherichia coli (E. coli)		562	SAMEA4350773	PRJEB14873	academisch medisch centrum	2016-12-3	n/a	major	Scaffold	full		100x			GCA_900093885.1	GCF_900093885.1	yes
NZ_FLYT01000393.1	240	99.15	98.33		scaffolds_20151359	Escherichia coli (E. coli)		562	SAMEA4350773	PRJEB14873	academisch medisch centrum	2016-12-3	n/a	major	Scaffold	full		100x			GCA_900093885.1	GCF_900093885.1	yes
NZ_FLYT01000394.1	239	100	100		scaffolds_20151359	Escherichia coli (E. coli)		562	SAMEA4350773	PRJEB14873	academisch medisch centrum	2016-12-3	n/a	major	Scaffold	full		100x			GCA_900093885.1	GCF_900093885.1	yes
NZ_FLYT01000395.1	239	100	100		scaffolds_20151359	Escherichia coli (E. coli)		562	SAMEA4350773	PRJEB14873	academisch medisch centrum	2016-12-3	n/a	major	Scaffold	full		100x			GCA_900093885.1	GCF_900093885.1	yes
NZ_FLYT01000396.1	239	99.58	100		scaffolds_20151359	Escherichia coli (E. coli)		562	SAMEA4350773	PRJEB14873	academisch medisch centrum	2016-12-3	n/a	major	Scaffold	full		100x			GCA_900093885.1	GCF_900093885.1	yes
NZ_FLYT01000397.1	238	100	100		scaffolds_20151359	Escherichia coli (E. coli)		562	SAMEA4350773	PRJEB14873	academisch medisch centrum	2016-12-3	n/a	major	Scaffold	full		100x			GCA_900093885.1	GCF_900093885.1	yes
NZ_FLYT01000398.1	238	100	100		scaffolds_20151359	Escherichia coli (E. coli)		562	SAMEA4350773	PRJEB14873	academisch medisch centrum	2016-12-3	n/a	major	Scaffold	full		100x			GCA_900093885.1	GCF_900093885.1	yes
NZ_FLYT01000399.1	238	100	100		scaffolds_20151359	Escherichia coli (E. coli)		562	SAMEA4350773	PRJEB14873	academisch medisch centrum	2016-12-3	n/a	major	Scaffold	full		100x			GCA_900093885.1	GCF_900093885.1	yes
NZ_FLYT01000400.1	238	99.58	100		scaffolds_20151359	Escherichia coli (E. coli)		562	SAMEA4350773	PRJEB14873	academisch medisch centrum	2016-12-3	n/a	major	Scaffold	full		100x			GCA_900093885.1	GCF_900093885.1	yes
NZ_FLYT01000401.1	238	100	100		scaffolds_20151359	Escherichia coli (E. coli)		562	SAMEA4350773	PRJEB14873	academisch medisch centrum	2016-12-3	n/a	major	Scaffold	full		100x			GCA_900093885.1	GCF_900093885.1	yes
NZ_FLYT01000402.1	238	99.58	100		scaffolds_20151359	Escherichia coli (E. coli)		562	SAMEA4350773	PRJEB14873	academisch medisch centrum	2016-12-3	n/a	major	Scaffold	full		100x			GCA_900093885.1	GCF_900093885.1	yes
NZ_FLYT01000403.1	238	100	100		scaffolds_20151359	Escherichia coli (E. coli)		562	SAMEA4350773	PRJEB14873	academisch medisch centrum	2016-12-3	n/a	major	Scaffold	full		100x			GCA_900093885.1	GCF_900093885.1	yes
NZ_FLYT01000404.1	238	100	100		scaffolds_20151359	Escherichia coli (E. coli)		562	SAMEA4350773	PRJEB14873	academisch medisch centrum	2016-12-3	n/a	major	Scaffold	full		100x			GCA_900093885.1	GCF_900093885.1	yes
NZ_FLYT01000406.1	237	100	100		scaffolds_20151359	Escherichia coli (E. coli)		562	SAMEA4350773	PRJEB14873	academisch medisch centrum	2016-12-3	n/a	major	Scaffold	full		100x			GCA_900093885.1	GCF_900093885.1	yes
NZ_FLYT01000407.1	236	99.58	100		scaffolds_20151359	Escherichia coli (E. coli)		562	SAMEA4350773	PRJEB14873	academisch medisch centrum	2016-12-3	n/a	major	Scaffold	full		100x			GCA_900093885.1	GCF_900093885.1	yes
NZ_FLYT01000409.1	236	99.58	100		scaffolds_20151359	Escherichia coli (E. coli)		562	SAMEA4350773	PRJEB14873	academisch medisch centrum	2016-12-3	n/a	major	Scaffold	full		100x			GCA_900093885.1	GCF_900093885.1	yes
NZ_FLYT01000410.1	236	100	100		scaffolds_20151359	Escherichia coli (E. coli)		562	SAMEA4350773	PRJEB14873	academisch medisch centrum	2016-12-3	n/a	major	Scaffold	full		100x			GCA_900093885.1	GCF_900093885.1	yes
NZ_FLYT01000411.1	236	99.15	100		scaffolds_20151359	Escherichia coli (E. coli)		562	SAMEA4350773	PRJEB14873	academisch medisch centrum	2016-12-3	n/a	major	Scaffold	full		100x			GCA_900093885.1	GCF_900093885.1	yes
NZ_FLYT01000412.1	235	100	100		scaffolds_20151359	Escherichia coli (E. coli)		562	SAMEA4350773	PRJEB14873	academisch medisch centrum	2016-12-3	n/a	major	Scaffold	full		100x			GCA_900093885.1	GCF_900093885.1	yes
NZ_FLYT01000413.1	234	100	100	WP_077251392.1	scaffolds_20151359	Escherichia coli (E. coli)		562	SAMEA4350773	PRJEB14873	academisch medisch centrum	2016-12-3	n/a	major	Scaffold	full		100x			GCA_900093885.1	GCF_900093885.1	yes
NZ_FLYT01000414.1	234	100	100		scaffolds_20151359	Escherichia coli (E. coli)		562	SAMEA4350773	PRJEB14873	academisch medisch centrum	2016-12-3	n/a	major	Scaffold	full		100x			GCA_900093885.1	GCF_900093885.1	yes
NZ_FLYT01000415.1	234	100	100		scaffolds_20151359	Escherichia coli (E. coli)		562	SAMEA4350773	PRJEB14873	academisch medisch centrum	2016-12-3	n/a	major	Scaffold	full		100x			GCA_900093885.1	GCF_900093885.1	yes
NZ_FLYT01000416.1	234	99.15	100		scaffolds_20151359	Escherichia coli (E. coli)		562	SAMEA4350773	PRJEB14873	academisch medisch centrum	2016-12-3	n/a	major	Scaffold	full		100x			GCA_900093885.1	GCF_900093885.1	yes
NZ_FLYT01000417.1	234	99.15	100		scaffolds_20151359	Escherichia coli (E. coli)		562	SAMEA4350773	PRJEB14873	academisch medisch centrum	2016-12-3	n/a	major	Scaffold	full		100x			GCA_900093885.1	GCF_900093885.1	yes
NZ_FLYT01000418.1	233	100	100		scaffolds_20151359	Escherichia coli (E. coli)		562	SAMEA4350773	PRJEB14873	academisch medisch centrum	2016-12-3	n/a	major	Scaffold	full		100x			GCA_900093885.1	GCF_900093885.1	yes
NZ_FLYT01000419.1	233	100	100		scaffolds_20151359	Escherichia coli (E. coli)		562	SAMEA4350773	PRJEB14873	academisch medisch centrum	2016-12-3	n/a	major	Scaffold	full		100x			GCA_900093885.1	GCF_900093885.1	yes
NZ_FLYT01000420.1	233	100	100		scaffolds_20151359	Escherichia coli (E. coli)		562	SAMEA4350773	PRJEB14873	academisch medisch centrum	2016-12-3	n/a	major	Scaffold	full		100x			GCA_900093885.1	GCF_900093885.1	yes
NZ_FLYT01000421.1	233	100	100		scaffolds_20151359	Escherichia coli (E. coli)		562	SAMEA4350773	PRJEB14873	academisch medisch centrum	2016-12-3	n/a	major	Scaffold	full		100x			GCA_900093885.1	GCF_900093885.1	yes
NZ_FLYT01000422.1	232	100	100		scaffolds_20151359	Escherichia coli (E. coli)		562	SAMEA4350773	PRJEB14873	academisch medisch centrum	2016-12-3	n/a	major	Scaffold	full		100x			GCA_900093885.1	GCF_900093885.1	yes
NZ_FLYT01000423.1	232	100	100		scaffolds_20151359	Escherichia coli (E. coli)		562	SAMEA4350773	PRJEB14873	academisch medisch centrum	2016-12-3	n/a	major	Scaffold	full		100x			GCA_900093885.1	GCF_900093885.1	yes
NZ_FLYT01000424.1	231	100	100		scaffolds_20151359	Escherichia coli (E. coli)		562	SAMEA4350773	PRJEB14873	academisch medisch centrum	2016-12-3	n/a	major	Scaffold	full		100x			GCA_900093885.1	GCF_900093885.1	yes
NZ_FLYT01000425.1	231	100	100		scaffolds_20151359	Escherichia coli (E. coli)		562	SAMEA4350773	PRJEB14873	academisch medisch centrum	2016-12-3	n/a	major	Scaffold	full		100x			GCA_900093885.1	GCF_900093885.1	yes
NZ_FLYT01000426.1	231	100	100		scaffolds_20151359	Escherichia coli (E. coli)		562	SAMEA4350773	PRJEB14873	academisch medisch centrum	2016-12-3	n/a	major	Scaffold	full		100x			GCA_900093885.1	GCF_900093885.1	yes
NZ_FLYT01000427.1	231	99.57	100		scaffolds_20151359	Escherichia coli (E. coli)		562	SAMEA4350773	PRJEB14873	academisch medisch centrum	2016-12-3	n/a	major	Scaffold	full		100x			GCA_900093885.1	GCF_900093885.1	yes
NZ_FLYT01000429.1	230	99.57	100		scaffolds_20151359	Escherichia coli (E. coli)		562	SAMEA4350773	PRJEB14873	academisch medisch centrum	2016-12-3	n/a	major	Scaffold	full		100x			GCA_900093885.1	GCF_900093885.1	yes
NZ_FLYT01000430.1	230	99.56	99.13		scaffolds_20151359	Escherichia coli (E. coli)		562	SAMEA4350773	PRJEB14873	academisch medisch centrum	2016-12-3	n/a	major	Scaffold	full		100x			GCA_900093885.1	GCF_900093885.1	yes
NZ_FLYT01000431.1	230	100	100		scaffolds_20151359	Escherichia coli (E. coli)		562	SAMEA4350773	PRJEB14873	academisch medisch centrum	2016-12-3	n/a	major	Scaffold	full		100x			GCA_900093885.1	GCF_900093885.1	yes
NZ_FLYT01000432.1	229	100	100		scaffolds_20151359	Escherichia coli (E. coli)		562	SAMEA4350773	PRJEB14873	academisch medisch centrum	2016-12-3	n/a	major	Scaffold	full		100x			GCA_900093885.1	GCF_900093885.1	yes
NZ_FLYT01000433.1	229	100	100		scaffolds_20151359	Escherichia coli (E. coli)		562	SAMEA4350773	PRJEB14873	academisch medisch centrum	2016-12-3	n/a	major	Scaffold	full		100x			GCA_900093885.1	GCF_900093885.1	yes
NZ_FLYT01000434.1	229	100	100		scaffolds_20151359	Escherichia coli (E. coli)		562	SAMEA4350773	PRJEB14873	academisch medisch centrum	2016-12-3	n/a	major	Scaffold	full		100x			GCA_900093885.1	GCF_900093885.1	yes
NZ_FLYU01000216.1	242	100	100		scaffolds_20160018	Escherichia coli (E. coli)		562	SAMEA4350782	PRJEB14873	academisch medisch centrum	2016-12-3	n/a	major	Scaffold	full		100x			GCA_900093975.1	GCF_900093975.1	yes
NZ_FLYU01000220.1	239	100	100		scaffolds_20160018	Escherichia coli (E. coli)		562	SAMEA4350782	PRJEB14873	academisch medisch centrum	2016-12-3	n/a	major	Scaffold	full		100x			GCA_900093975.1	GCF_900093975.1	yes
NZ_FLYU01000221.1	238	100	100		scaffolds_20160018	Escherichia coli (E. coli)		562	SAMEA4350782	PRJEB14873	academisch medisch centrum	2016-12-3	n/a	major	Scaffold	full		100x			GCA_900093975.1	GCF_900093975.1	yes
NZ_FLYU01000223.1	236	100	100	WP_077250463.1	scaffolds_20160018	Escherichia coli (E. coli)		562	SAMEA4350782	PRJEB14873	academisch medisch centrum	2016-12-3	n/a	major	Scaffold	full		100x			GCA_900093975.1	GCF_900093975.1	yes
NZ_FLYU01000225.1	234	100	100		scaffolds_20160018	Escherichia coli (E. coli)		562	SAMEA4350782	PRJEB14873	academisch medisch centrum	2016-12-3	n/a	major	Scaffold	full		100x			GCA_900093975.1	GCF_900093975.1	yes
NZ_FLYV01000194.1	262	100	100		scaffolds_20160017	Escherichia coli (E. coli)		562	SAMEA4350781	PRJEB14873	academisch medisch centrum	2016-12-3	n/a	major	Scaffold	full		100x			GCA_900093985.1	GCF_900093985.1	yes
NZ_FLYV01000207.1	235	99.57	100		scaffolds_20160017	Escherichia coli (E. coli)		562	SAMEA4350781	PRJEB14873	academisch medisch centrum	2016-12-3	n/a	major	Scaffold	full		100x			GCA_900093985.1	GCF_900093985.1	yes
NZ_FLYV01000210.1	233	100	100		scaffolds_20160017	Escherichia coli (E. coli)		562	SAMEA4350781	PRJEB14873	academisch medisch centrum	2016-12-3	n/a	major	Scaffold	full		100x			GCA_900093985.1	GCF_900093985.1	yes
NZ_FLYV01000213.1	233	100	100		scaffolds_20160017	Escherichia coli (E. coli)		562	SAMEA4350781	PRJEB14873	academisch medisch centrum	2016-12-3	n/a	major	Scaffold	full		100x			GCA_900093985.1	GCF_900093985.1	yes
NZ_FLYW01000146.1	245	99.18	100		scaffolds_20160014	Escherichia coli (E. coli)		562	SAMEA4350778	PRJEB14873	academisch medisch centrum	2016-12-3	n/a	major	Scaffold	full		100x			GCA_900093965.1	GCF_900093965.1	yes
NZ_FLYW01000147.1	244	100	100		scaffolds_20160014	Escherichia coli (E. coli)		562	SAMEA4350778	PRJEB14873	academisch medisch centrum	2016-12-3	n/a	major	Scaffold	full		100x			GCA_900093965.1	GCF_900093965.1	yes
NZ_FLYX01000192.1	246	100	100		scaffolds_C333	Escherichia coli (E. coli)		562	SAMEA4350789	PRJEB14873	academisch medisch centrum	2016-12-3	n/a	major	Scaffold	full		100x			GCA_900093875.1	GCF_900093875.1	yes
NZ_FLYX01000197.1	241	100	100		scaffolds_C333	Escherichia coli (E. coli)		562	SAMEA4350789	PRJEB14873	academisch medisch centrum	2016-12-3	n/a	major	Scaffold	full		100x			GCA_900093875.1	GCF_900093875.1	yes
NZ_FLYX01000206.1	232	100	100		scaffolds_C333	Escherichia coli (E. coli)		562	SAMEA4350789	PRJEB14873	academisch medisch centrum	2016-12-3	n/a	major	Scaffold	full		100x			GCA_900093875.1	GCF_900093875.1	yes
NZ_FLYY01000177.1	278	100	100		scaffolds_C413	Escherichia coli (E. coli)		562	SAMEA4350790	PRJEB14873	academisch medisch centrum	2016-12-3	n/a	major	Scaffold	full		100x			GCA_900094025.1	GCF_900094025.1	yes
NZ_FLYY01000185.1	268	100	100		scaffolds_C413	Escherichia coli (E. coli)		562	SAMEA4350790	PRJEB14873	academisch medisch centrum	2016-12-3	n/a	major	Scaffold	full		100x			GCA_900094025.1	GCF_900094025.1	yes
NZ_FLYY01000188.1	264	99.62	100		scaffolds_C413	Escherichia coli (E. coli)		562	SAMEA4350790	PRJEB14873	academisch medisch centrum	2016-12-3	n/a	major	Scaffold	full		100x			GCA_900094025.1	GCF_900094025.1	yes
NZ_FLYY01000197.1	236	100	100		scaffolds_C413	Escherichia coli (E. coli)		562	SAMEA4350790	PRJEB14873	academisch medisch centrum	2016-12-3	n/a	major	Scaffold	full		100x			GCA_900094025.1	GCF_900094025.1	yes
NZ_FLYY01000199.1	232	100	100		scaffolds_C413	Escherichia coli (E. coli)		562	SAMEA4350790	PRJEB14873	academisch medisch centrum	2016-12-3	n/a	major	Scaffold	full		100x			GCA_900094025.1	GCF_900094025.1	yes
NZ_FLYZ01000248.1	277	100	100		scaffolds_20160015	Escherichia coli (E. coli)		562	SAMEA4350779	PRJEB14873	academisch medisch centrum	2016-12-3	n/a	major	Scaffold	full		100x			GCA_900093825.1	GCF_900093825.1	yes
NZ_FLYZ01000255.1	271	100	100		scaffolds_20160015	Escherichia coli (E. coli)		562	SAMEA4350779	PRJEB14873	academisch medisch centrum	2016-12-3	n/a	major	Scaffold	full		100x			GCA_900093825.1	GCF_900093825.1	yes
NZ_FLYZ01000264.1	259	100	100		scaffolds_20160015	Escherichia coli (E. coli)		562	SAMEA4350779	PRJEB14873	academisch medisch centrum	2016-12-3	n/a	major	Scaffold	full		100x			GCA_900093825.1	GCF_900093825.1	yes
NZ_FLYZ01000266.1	257	100	100		scaffolds_20160015	Escherichia coli (E. coli)		562	SAMEA4350779	PRJEB14873	academisch medisch centrum	2016-12-3	n/a	major	Scaffold	full		100x			GCA_900093825.1	GCF_900093825.1	yes
NZ_FLYZ01000278.1	241	100	100		scaffolds_20160015	Escherichia coli (E. coli)		562	SAMEA4350779	PRJEB14873	academisch medisch centrum	2016-12-3	n/a	major	Scaffold	full		100x			GCA_900093825.1	GCF_900093825.1	yes
NZ_FLYZ01000281.1	239	100	100		scaffolds_20160015	Escherichia coli (E. coli)		562	SAMEA4350779	PRJEB14873	academisch medisch centrum	2016-12-3	n/a	major	Scaffold	full		100x			GCA_900093825.1	GCF_900093825.1	yes
NZ_FLZB01000124.1	676	99.7	100		scaffolds_20151360	Escherichia coli (E. coli)		562	SAMEA4350774	PRJEB14873	academisch medisch centrum	2016-12-3	n/a	major	Scaffold	full		100x			GCA_900093835.1	GCF_900093835.1	yes
NZ_FLZB01000131.1	607	99.84	100		scaffolds_20151360	Escherichia coli (E. coli)		562	SAMEA4350774	PRJEB14873	academisch medisch centrum	2016-12-3	n/a	major	Scaffold	full		100x			GCA_900093835.1	GCF_900093835.1	yes
NZ_FLZB01000135.1	583	99.83	100	WP_077251380.1	scaffolds_20151360	Escherichia coli (E. coli)		562	SAMEA4350774	PRJEB14873	academisch medisch centrum	2016-12-3	n/a	major	Scaffold	full		100x			GCA_900093835.1	GCF_900093835.1	yes
NZ_FLZB01000136.1	582	100	100	WP_072820583.1	scaffolds_20151360	Escherichia coli (E. coli)		562	SAMEA4350774	PRJEB14873	academisch medisch centrum	2016-12-3	n/a	major	Scaffold	full		100x			GCA_900093835.1	GCF_900093835.1	yes
NZ_FLZB01000137.1	571	99.12	100		scaffolds_20151360	Escherichia coli (E. coli)		562	SAMEA4350774	PRJEB14873	academisch medisch centrum	2016-12-3	n/a	major	Scaffold	full		100x			GCA_900093835.1	GCF_900093835.1	yes
NZ_FLZB01000138.1	571	100	100		scaffolds_20151360	Escherichia coli (E. coli)		562	SAMEA4350774	PRJEB14873	academisch medisch centrum	2016-12-3	n/a	major	Scaffold	full		100x			GCA_900093835.1	GCF_900093835.1	yes
NZ_FLZB01000145.1	542	99.82	100	WP_077252387.1	scaffolds_20151360	Escherichia coli (E. coli)		562	SAMEA4350774	PRJEB14873	academisch medisch centrum	2016-12-3	n/a	major	Scaffold	full		100x			GCA_900093835.1	GCF_900093835.1	yes
NZ_FLZB01000147.1	538	100	100		scaffolds_20151360	Escherichia coli (E. coli)		562	SAMEA4350774	PRJEB14873	academisch medisch centrum	2016-12-3	n/a	major	Scaffold	full		100x			GCA_900093835.1	GCF_900093835.1	yes
NZ_FLZB01000148.1	536	100	100		scaffolds_20151360	Escherichia coli (E. coli)		562	SAMEA4350774	PRJEB14873	academisch medisch centrum	2016-12-3	n/a	major	Scaffold	full		100x			GCA_900093835.1	GCF_900093835.1	yes
NZ_FLZB01000149.1	530	99.62	100		scaffolds_20151360	Escherichia coli (E. coli)		562	SAMEA4350774	PRJEB14873	academisch medisch centrum	2016-12-3	n/a	major	Scaffold	full		100x			GCA_900093835.1	GCF_900093835.1	yes
NZ_FLZB01000151.1	513	99.81	100	WP_077252388.1	scaffolds_20151360	Escherichia coli (E. coli)		562	SAMEA4350774	PRJEB14873	academisch medisch centrum	2016-12-3	n/a	major	Scaffold	full		100x			GCA_900093835.1	GCF_900093835.1	yes
NZ_FLZB01000153.1	511	99.61	100		scaffolds_20151360	Escherichia coli (E. coli)		562	SAMEA4350774	PRJEB14873	academisch medisch centrum	2016-12-3	n/a	major	Scaffold	full		100x			GCA_900093835.1	GCF_900093835.1	yes
NZ_FLZB01000155.1	496	100	100	WP_077252389.1	scaffolds_20151360	Escherichia coli (E. coli)		562	SAMEA4350774	PRJEB14873	academisch medisch centrum	2016-12-3	n/a	major	Scaffold	full		100x			GCA_900093835.1	GCF_900093835.1	yes
NZ_FLZB01000156.1	496	99.8	100		scaffolds_20151360	Escherichia coli (E. coli)		562	SAMEA4350774	PRJEB14873	academisch medisch centrum	2016-12-3	n/a	major	Scaffold	full		100x			GCA_900093835.1	GCF_900093835.1	yes
NZ_FLZB01000159.1	488	99.8	100		scaffolds_20151360	Escherichia coli (E. coli)		562	SAMEA4350774	PRJEB14873	academisch medisch centrum	2016-12-3	n/a	major	Scaffold	full		100x			GCA_900093835.1	GCF_900093835.1	yes
NZ_FLZB01000160.1	485	100	100	WP_072820595.1	scaffolds_20151360	Escherichia coli (E. coli)		562	SAMEA4350774	PRJEB14873	academisch medisch centrum	2016-12-3	n/a	major	Scaffold	full		100x			GCA_900093835.1	GCF_900093835.1	yes
NZ_FLZB01000161.1	474	100	100		scaffolds_20151360	Escherichia coli (E. coli)		562	SAMEA4350774	PRJEB14873	academisch medisch centrum	2016-12-3	n/a	major	Scaffold	full		100x			GCA_900093835.1	GCF_900093835.1	yes
NZ_FLZB01000162.1	474	99.79	100		scaffolds_20151360	Escherichia coli (E. coli)		562	SAMEA4350774	PRJEB14873	academisch medisch centrum	2016-12-3	n/a	major	Scaffold	full		100x			GCA_900093835.1	GCF_900093835.1	yes
NZ_FLZB01000163.1	473	100	100	WP_072820598.1	scaffolds_20151360	Escherichia coli (E. coli)		562	SAMEA4350774	PRJEB14873	academisch medisch centrum	2016-12-3	n/a	major	Scaffold	full		100x			GCA_900093835.1	GCF_900093835.1	yes
NZ_FLZB01000166.1	472	99.79	100	WP_077252390.1	scaffolds_20151360	Escherichia coli (E. coli)		562	SAMEA4350774	PRJEB14873	academisch medisch centrum	2016-12-3	n/a	major	Scaffold	full		100x			GCA_900093835.1	GCF_900093835.1	yes
NZ_FLZB01000168.1	466	99.79	100	WP_077252391.1	scaffolds_20151360	Escherichia coli (E. coli)		562	SAMEA4350774	PRJEB14873	academisch medisch centrum	2016-12-3	n/a	major	Scaffold	full		100x			GCA_900093835.1	GCF_900093835.1	yes
NZ_FLZB01000169.1	466	99.36	100	WP_077252392.1	scaffolds_20151360	Escherichia coli (E. coli)		562	SAMEA4350774	PRJEB14873	academisch medisch centrum	2016-12-3	n/a	major	Scaffold	full		100x			GCA_900093835.1	GCF_900093835.1	yes
NZ_FLZB01000170.1	466	95.01	100	WP_072820605.1	scaffolds_20151360	Escherichia coli (E. coli)		562	SAMEA4350774	PRJEB14873	academisch medisch centrum	2016-12-3	n/a	major	Scaffold	full		100x			GCA_900093835.1	GCF_900093835.1	yes
NZ_FLZB01000171.1	459	99.78	100		scaffolds_20151360	Escherichia coli (E. coli)		562	SAMEA4350774	PRJEB14873	academisch medisch centrum	2016-12-3	n/a	major	Scaffold	full		100x			GCA_900093835.1	GCF_900093835.1	yes
NZ_FLZB01000172.1	457	99.78	100		scaffolds_20151360	Escherichia coli (E. coli)		562	SAMEA4350774	PRJEB14873	academisch medisch centrum	2016-12-3	n/a	major	Scaffold	full		100x			GCA_900093835.1	GCF_900093835.1	yes
NZ_FLZB01000174.1	453	99.56	100		scaffolds_20151360	Escherichia coli (E. coli)		562	SAMEA4350774	PRJEB14873	academisch medisch centrum	2016-12-3	n/a	major	Scaffold	full		100x			GCA_900093835.1	GCF_900093835.1	yes
NZ_FLZB01000175.1	452	100	100		scaffolds_20151360	Escherichia coli (E. coli)		562	SAMEA4350774	PRJEB14873	academisch medisch centrum	2016-12-3	n/a	major	Scaffold	full		100x			GCA_900093835.1	GCF_900093835.1	yes
NZ_FLZB01000176.1	448	99.78	100		scaffolds_20151360	Escherichia coli (E. coli)		562	SAMEA4350774	PRJEB14873	academisch medisch centrum	2016-12-3	n/a	major	Scaffold	full		100x			GCA_900093835.1	GCF_900093835.1	yes
NZ_FLZB01000177.1	438	100	100	WP_077252393.1	scaffolds_20151360	Escherichia coli (E. coli)		562	SAMEA4350774	PRJEB14873	academisch medisch centrum	2016-12-3	n/a	major	Scaffold	full		100x			GCA_900093835.1	GCF_900093835.1	yes
NZ_FLZB01000178.1	435	100	100		scaffolds_20151360	Escherichia coli (E. coli)		562	SAMEA4350774	PRJEB14873	academisch medisch centrum	2016-12-3	n/a	major	Scaffold	full		100x			GCA_900093835.1	GCF_900093835.1	yes
NZ_FLZB01000179.1	434	100	100	WP_072820614.1	scaffolds_20151360	Escherichia coli (E. coli)		562	SAMEA4350774	PRJEB14873	academisch medisch centrum	2016-12-3	n/a	major	Scaffold	full		100x			GCA_900093835.1	GCF_900093835.1	yes
NZ_FLZB01000181.1	429	99.77	100		scaffolds_20151360	Escherichia coli (E. coli)		562	SAMEA4350774	PRJEB14873	academisch medisch centrum	2016-12-3	n/a	major	Scaffold	full		100x			GCA_900093835.1	GCF_900093835.1	yes
NZ_FLZB01000182.1	428	100	100		scaffolds_20151360	Escherichia coli (E. coli)		562	SAMEA4350774	PRJEB14873	academisch medisch centrum	2016-12-3	n/a	major	Scaffold	full		100x			GCA_900093835.1	GCF_900093835.1	yes
NZ_FLZB01000183.1	423	99.76	100		scaffolds_20151360	Escherichia coli (E. coli)		562	SAMEA4350774	PRJEB14873	academisch medisch centrum	2016-12-3	n/a	major	Scaffold	full		100x			GCA_900093835.1	GCF_900093835.1	yes
NZ_FLZB01000184.1	422	98.34	100		scaffolds_20151360	Escherichia coli (E. coli)		562	SAMEA4350774	PRJEB14873	academisch medisch centrum	2016-12-3	n/a	major	Scaffold	full		100x			GCA_900093835.1	GCF_900093835.1	yes
NZ_FLZB01000185.1	417	99.76	99.28		scaffolds_20151360	Escherichia coli (E. coli)		562	SAMEA4350774	PRJEB14873	academisch medisch centrum	2016-12-3	n/a	major	Scaffold	full		100x			GCA_900093835.1	GCF_900093835.1	yes
NZ_FLZB01000187.1	415	100	100		scaffolds_20151360	Escherichia coli (E. coli)		562	SAMEA4350774	PRJEB14873	academisch medisch centrum	2016-12-3	n/a	major	Scaffold	full		100x			GCA_900093835.1	GCF_900093835.1	yes
NZ_FLZB01000188.1	414	100	100		scaffolds_20151360	Escherichia coli (E. coli)		562	SAMEA4350774	PRJEB14873	academisch medisch centrum	2016-12-3	n/a	major	Scaffold	full		100x			GCA_900093835.1	GCF_900093835.1	yes
NZ_FLZB01000189.1	412	99.76	100		scaffolds_20151360	Escherichia coli (E. coli)		562	SAMEA4350774	PRJEB14873	academisch medisch centrum	2016-12-3	n/a	major	Scaffold	full		100x			GCA_900093835.1	GCF_900093835.1	yes
NZ_FLZB01000190.1	406	99.75	100	WP_072820617.1	scaffolds_20151360	Escherichia coli (E. coli)		562	SAMEA4350774	PRJEB14873	academisch medisch centrum	2016-12-3	n/a	major	Scaffold	full		100x			GCA_900093835.1	GCF_900093835.1	yes
NZ_FLZB01000191.1	406	100	100		scaffolds_20151360	Escherichia coli (E. coli)		562	SAMEA4350774	PRJEB14873	academisch medisch centrum	2016-12-3	n/a	major	Scaffold	full		100x			GCA_900093835.1	GCF_900093835.1	yes
NZ_FLZB01000192.1	403	100	99.26		scaffolds_20151360	Escherichia coli (E. coli)		562	SAMEA4350774	PRJEB14873	academisch medisch centrum	2016-12-3	n/a	major	Scaffold	full		100x			GCA_900093835.1	GCF_900093835.1	yes
NZ_FLZB01000193.1	402	99.75	100		scaffolds_20151360	Escherichia coli (E. coli)		562	SAMEA4350774	PRJEB14873	academisch medisch centrum	2016-12-3	n/a	major	Scaffold	full		100x			GCA_900093835.1	GCF_900093835.1	yes
NZ_FLZB01000194.1	399	99.75	100		scaffolds_20151360	Escherichia coli (E. coli)		562	SAMEA4350774	PRJEB14873	academisch medisch centrum	2016-12-3	n/a	major	Scaffold	full		100x			GCA_900093835.1	GCF_900093835.1	yes
NZ_FLZB01000195.1	399	99.75	100		scaffolds_20151360	Escherichia coli (E. coli)		562	SAMEA4350774	PRJEB14873	academisch medisch centrum	2016-12-3	n/a	major	Scaffold	full		100x			GCA_900093835.1	GCF_900093835.1	yes
NZ_FLZB01000197.1	392	95.8	90.82		scaffolds_20151360	Escherichia coli (E. coli)		562	SAMEA4350774	PRJEB14873	academisch medisch centrum	2016-12-3	n/a	major	Scaffold	full		100x			GCA_900093835.1	GCF_900093835.1	yes
NZ_FLZB01000198.1	391	99.74	100		scaffolds_20151360	Escherichia coli (E. coli)		562	SAMEA4350774	PRJEB14873	academisch medisch centrum	2016-12-3	n/a	major	Scaffold	full		100x			GCA_900093835.1	GCF_900093835.1	yes
NZ_FLZB01000199.1	390	100	100		scaffolds_20151360	Escherichia coli (E. coli)		562	SAMEA4350774	PRJEB14873	academisch medisch centrum	2016-12-3	n/a	major	Scaffold	full		100x			GCA_900093835.1	GCF_900093835.1	yes
NZ_FLZB01000200.1	388	99.74	100	WP_072820620.1	scaffolds_20151360	Escherichia coli (E. coli)		562	SAMEA4350774	PRJEB14873	academisch medisch centrum	2016-12-3	n/a	major	Scaffold	full		100x			GCA_900093835.1	GCF_900093835.1	yes
NZ_FLZB01000201.1	386	99.74	100		scaffolds_20151360	Escherichia coli (E. coli)		562	SAMEA4350774	PRJEB14873	academisch medisch centrum	2016-12-3	n/a	major	Scaffold	full		100x			GCA_900093835.1	GCF_900093835.1	yes
NZ_FLZB01000202.1	384	100	100		scaffolds_20151360	Escherichia coli (E. coli)		562	SAMEA4350774	PRJEB14873	academisch medisch centrum	2016-12-3	n/a	major	Scaffold	full		100x			GCA_900093835.1	GCF_900093835.1	yes
NZ_FLZB01000204.1	383	100	100		scaffolds_20151360	Escherichia coli (E. coli)		562	SAMEA4350774	PRJEB14873	academisch medisch centrum	2016-12-3	n/a	major	Scaffold	full		100x			GCA_900093835.1	GCF_900093835.1	yes
NZ_FLZB01000205.1	381	99.74	99.48		scaffolds_20151360	Escherichia coli (E. coli)		562	SAMEA4350774	PRJEB14873	academisch medisch centrum	2016-12-3	n/a	major	Scaffold	full		100x			GCA_900093835.1	GCF_900093835.1	yes
NZ_FLZB01000207.1	380	99.74	100	WP_077252394.1	scaffolds_20151360	Escherichia coli (E. coli)		562	SAMEA4350774	PRJEB14873	academisch medisch centrum	2016-12-3	n/a	major	Scaffold	full		100x			GCA_900093835.1	GCF_900093835.1	yes
NZ_FLZB01000208.1	374	99.73	100		scaffolds_20151360	Escherichia coli (E. coli)		562	SAMEA4350774	PRJEB14873	academisch medisch centrum	2016-12-3	n/a	major	Scaffold	full		100x			GCA_900093835.1	GCF_900093835.1	yes
NZ_FLZB01000209.1	372	100	100		scaffolds_20151360	Escherichia coli (E. coli)		562	SAMEA4350774	PRJEB14873	academisch medisch centrum	2016-12-3	n/a	major	Scaffold	full		100x			GCA_900093835.1	GCF_900093835.1	yes
NZ_FLZB01000210.1	371	100	100		scaffolds_20151360	Escherichia coli (E. coli)		562	SAMEA4350774	PRJEB14873	academisch medisch centrum	2016-12-3	n/a	major	Scaffold	full		100x			GCA_900093835.1	GCF_900093835.1	yes
NZ_FLZB01000212.1	368	99.73	100		scaffolds_20151360	Escherichia coli (E. coli)		562	SAMEA4350774	PRJEB14873	academisch medisch centrum	2016-12-3	n/a	major	Scaffold	full		100x			GCA_900093835.1	GCF_900093835.1	yes
NZ_FLZB01000213.1	366	99.73	100		scaffolds_20151360	Escherichia coli (E. coli)		562	SAMEA4350774	PRJEB14873	academisch medisch centrum	2016-12-3	n/a	major	Scaffold	full		100x			GCA_900093835.1	GCF_900093835.1	yes
NZ_FLZB01000214.1	366	99.73	100		scaffolds_20151360	Escherichia coli (E. coli)		562	SAMEA4350774	PRJEB14873	academisch medisch centrum	2016-12-3	n/a	major	Scaffold	full		100x			GCA_900093835.1	GCF_900093835.1	yes
NZ_FLZB01000215.1	365	99.73	100		scaffolds_20151360	Escherichia coli (E. coli)		562	SAMEA4350774	PRJEB14873	academisch medisch centrum	2016-12-3	n/a	major	Scaffold	full		100x			GCA_900093835.1	GCF_900093835.1	yes
NZ_FLZB01000217.1	364	99.73	100		scaffolds_20151360	Escherichia coli (E. coli)		562	SAMEA4350774	PRJEB14873	academisch medisch centrum	2016-12-3	n/a	major	Scaffold	full		100x			GCA_900093835.1	GCF_900093835.1	yes
NZ_FLZB01000218.1	363	100	100		scaffolds_20151360	Escherichia coli (E. coli)		562	SAMEA4350774	PRJEB14873	academisch medisch centrum	2016-12-3	n/a	major	Scaffold	full		100x			GCA_900093835.1	GCF_900093835.1	yes
NZ_FLZB01000219.1	360	99.72	100		scaffolds_20151360	Escherichia coli (E. coli)		562	SAMEA4350774	PRJEB14873	academisch medisch centrum	2016-12-3	n/a	major	Scaffold	full		100x			GCA_900093835.1	GCF_900093835.1	yes
NZ_FLZB01000221.1	360	99.72	100	WP_077252395.1	scaffolds_20151360	Escherichia coli (E. coli)		562	SAMEA4350774	PRJEB14873	academisch medisch centrum	2016-12-3	n/a	major	Scaffold	full		100x			GCA_900093835.1	GCF_900093835.1	yes
NZ_FLZB01000222.1	359	100	100		scaffolds_20151360	Escherichia coli (E. coli)		562	SAMEA4350774	PRJEB14873	academisch medisch centrum	2016-12-3	n/a	major	Scaffold	full		100x			GCA_900093835.1	GCF_900093835.1	yes
NZ_FLZB01000223.1	358	99.72	100		scaffolds_20151360	Escherichia coli (E. coli)		562	SAMEA4350774	PRJEB14873	academisch medisch centrum	2016-12-3	n/a	major	Scaffold	full		100x			GCA_900093835.1	GCF_900093835.1	yes
NZ_FLZB01000224.1	357	99.72	100		scaffolds_20151360	Escherichia coli (E. coli)		562	SAMEA4350774	PRJEB14873	academisch medisch centrum	2016-12-3	n/a	major	Scaffold	full		100x			GCA_900093835.1	GCF_900093835.1	yes
NZ_FLZB01000225.1	357	99.72	100		scaffolds_20151360	Escherichia coli (E. coli)		562	SAMEA4350774	PRJEB14873	academisch medisch centrum	2016-12-3	n/a	major	Scaffold	full		100x			GCA_900093835.1	GCF_900093835.1	yes
NZ_FLZB01000226.1	354	100	100	WP_077252396.1	scaffolds_20151360	Escherichia coli (E. coli)		562	SAMEA4350774	PRJEB14873	academisch medisch centrum	2016-12-3	n/a	major	Scaffold	full		100x			GCA_900093835.1	GCF_900093835.1	yes
NZ_FLZB01000227.1	354	99.72	100		scaffolds_20151360	Escherichia coli (E. coli)		562	SAMEA4350774	PRJEB14873	academisch medisch centrum	2016-12-3	n/a	major	Scaffold	full		100x			GCA_900093835.1	GCF_900093835.1	yes
NZ_FLZB01000229.1	350	100	100		scaffolds_20151360	Escherichia coli (E. coli)		562	SAMEA4350774	PRJEB14873	academisch medisch centrum	2016-12-3	n/a	major	Scaffold	full		100x			GCA_900093835.1	GCF_900093835.1	yes
NZ_FLZB01000231.1	350	100	100	WP_077252397.1	scaffolds_20151360	Escherichia coli (E. coli)		562	SAMEA4350774	PRJEB14873	academisch medisch centrum	2016-12-3	n/a	major	Scaffold	full		100x			GCA_900093835.1	GCF_900093835.1	yes
NZ_FLZB01000232.1	349	100	100		scaffolds_20151360	Escherichia coli (E. coli)		562	SAMEA4350774	PRJEB14873	academisch medisch centrum	2016-12-3	n/a	major	Scaffold	full		100x			GCA_900093835.1	GCF_900093835.1	yes
NZ_FLZB01000233.1	349	100	100		scaffolds_20151360	Escherichia coli (E. coli)		562	SAMEA4350774	PRJEB14873	academisch medisch centrum	2016-12-3	n/a	major	Scaffold	full		100x			GCA_900093835.1	GCF_900093835.1	yes
NZ_FLZB01000234.1	349	100	100		scaffolds_20151360	Escherichia coli (E. coli)		562	SAMEA4350774	PRJEB14873	academisch medisch centrum	2016-12-3	n/a	major	Scaffold	full		100x			GCA_900093835.1	GCF_900093835.1	yes
NZ_FLZB01000235.1	348	99.43	100		scaffolds_20151360	Escherichia coli (E. coli)		562	SAMEA4350774	PRJEB14873	academisch medisch centrum	2016-12-3	n/a	major	Scaffold	full		100x			GCA_900093835.1	GCF_900093835.1	yes
NZ_FLZB01000236.1	346	100	100		scaffolds_20151360	Escherichia coli (E. coli)		562	SAMEA4350774	PRJEB14873	academisch medisch centrum	2016-12-3	n/a	major	Scaffold	full		100x			GCA_900093835.1	GCF_900093835.1	yes
NZ_FLZB01000237.1	346	100	100	WP_072820647.1	scaffolds_20151360	Escherichia coli (E. coli)		562	SAMEA4350774	PRJEB14873	academisch medisch centrum	2016-12-3	n/a	major	Scaffold	full		100x			GCA_900093835.1	GCF_900093835.1	yes
NZ_FLZB01000238.1	345	99.71	100		scaffolds_20151360	Escherichia coli (E. coli)		562	SAMEA4350774	PRJEB14873	academisch medisch centrum	2016-12-3	n/a	major	Scaffold	full		100x			GCA_900093835.1	GCF_900093835.1	yes
NZ_FLZB01000241.1	340	100	100		scaffolds_20151360	Escherichia coli (E. coli)		562	SAMEA4350774	PRJEB14873	academisch medisch centrum	2016-12-3	n/a	major	Scaffold	full		100x			GCA_900093835.1	GCF_900093835.1	yes
NZ_FLZB01000242.1	340	96.47	100		scaffolds_20151360	Escherichia coli (E. coli)		562	SAMEA4350774	PRJEB14873	academisch medisch centrum	2016-12-3	n/a	major	Scaffold	full		100x			GCA_900093835.1	GCF_900093835.1	yes
NZ_FLZB01000245.1	337	100	100		scaffolds_20151360	Escherichia coli (E. coli)		562	SAMEA4350774	PRJEB14873	academisch medisch centrum	2016-12-3	n/a	major	Scaffold	full		100x			GCA_900093835.1	GCF_900093835.1	yes
NZ_FLZB01000246.1	334	100	100		scaffolds_20151360	Escherichia coli (E. coli)		562	SAMEA4350774	PRJEB14873	academisch medisch centrum	2016-12-3	n/a	major	Scaffold	full		100x			GCA_900093835.1	GCF_900093835.1	yes
NZ_FLZB01000247.1	333	99.7	100	WP_077251379.1	scaffolds_20151360	Escherichia coli (E. coli)		562	SAMEA4350774	PRJEB14873	academisch medisch centrum	2016-12-3	n/a	major	Scaffold	full		100x			GCA_900093835.1	GCF_900093835.1	yes
NZ_FLZB01000248.1	333	99.4	100		scaffolds_20151360	Escherichia coli (E. coli)		562	SAMEA4350774	PRJEB14873	academisch medisch centrum	2016-12-3	n/a	major	Scaffold	full		100x			GCA_900093835.1	GCF_900093835.1	yes
NZ_FLZB01000249.1	332	100	100		scaffolds_20151360	Escherichia coli (E. coli)		562	SAMEA4350774	PRJEB14873	academisch medisch centrum	2016-12-3	n/a	major	Scaffold	full		100x			GCA_900093835.1	GCF_900093835.1	yes
NZ_FLZB01000250.1	332	100	100		scaffolds_20151360	Escherichia coli (E. coli)		562	SAMEA4350774	PRJEB14873	academisch medisch centrum	2016-12-3	n/a	major	Scaffold	full		100x			GCA_900093835.1	GCF_900093835.1	yes
NZ_FLZB01000251.1	332	100	100		scaffolds_20151360	Escherichia coli (E. coli)		562	SAMEA4350774	PRJEB14873	academisch medisch centrum	2016-12-3	n/a	major	Scaffold	full		100x			GCA_900093835.1	GCF_900093835.1	yes
NZ_FLZB01000252.1	331	99.7	100		scaffolds_20151360	Escherichia coli (E. coli)		562	SAMEA4350774	PRJEB14873	academisch medisch centrum	2016-12-3	n/a	major	Scaffold	full		100x			GCA_900093835.1	GCF_900093835.1	yes
NZ_FLZB01000253.1	331	99.7	100		scaffolds_20151360	Escherichia coli (E. coli)		562	SAMEA4350774	PRJEB14873	academisch medisch centrum	2016-12-3	n/a	major	Scaffold	full		100x			GCA_900093835.1	GCF_900093835.1	yes
NZ_FLZB01000254.1	329	100	100		scaffolds_20151360	Escherichia coli (E. coli)		562	SAMEA4350774	PRJEB14873	academisch medisch centrum	2016-12-3	n/a	major	Scaffold	full		100x			GCA_900093835.1	GCF_900093835.1	yes
NZ_FLZB01000255.1	329	100	100	WP_072820651.1	scaffolds_20151360	Escherichia coli (E. coli)		562	SAMEA4350774	PRJEB14873	academisch medisch centrum	2016-12-3	n/a	major	Scaffold	full		100x			GCA_900093835.1	GCF_900093835.1	yes
NZ_FLZB01000256.1	329	100	100		scaffolds_20151360	Escherichia coli (E. coli)		562	SAMEA4350774	PRJEB14873	academisch medisch centrum	2016-12-3	n/a	major	Scaffold	full		100x			GCA_900093835.1	GCF_900093835.1	yes
NZ_FLZB01000257.1	328	100	100	WP_072820654.1	scaffolds_20151360	Escherichia coli (E. coli)		562	SAMEA4350774	PRJEB14873	academisch medisch centrum	2016-12-3	n/a	major	Scaffold	full		100x			GCA_900093835.1	GCF_900093835.1	yes
NZ_FLZB01000258.1	328	100	100		scaffolds_20151360	Escherichia coli (E. coli)		562	SAMEA4350774	PRJEB14873	academisch medisch centrum	2016-12-3	n/a	major	Scaffold	full		100x			GCA_900093835.1	GCF_900093835.1	yes
NZ_FLZB01000259.1	327	100	100		scaffolds_20151360	Escherichia coli (E. coli)		562	SAMEA4350774	PRJEB14873	academisch medisch centrum	2016-12-3	n/a	major	Scaffold	full		100x			GCA_900093835.1	GCF_900093835.1	yes
NZ_FLZB01000260.1	326	99.38	99.39		scaffolds_20151360	Escherichia coli (E. coli)		562	SAMEA4350774	PRJEB14873	academisch medisch centrum	2016-12-3	n/a	major	Scaffold	full		100x			GCA_900093835.1	GCF_900093835.1	yes
NZ_FLZB01000261.1	326	100	100		scaffolds_20151360	Escherichia coli (E. coli)		562	SAMEA4350774	PRJEB14873	academisch medisch centrum	2016-12-3	n/a	major	Scaffold	full		100x			GCA_900093835.1	GCF_900093835.1	yes
NZ_FLZB01000262.1	323	100	100		scaffolds_20151360	Escherichia coli (E. coli)		562	SAMEA4350774	PRJEB14873	academisch medisch centrum	2016-12-3	n/a	major	Scaffold	full		100x			GCA_900093835.1	GCF_900093835.1	yes
NZ_FLZB01000263.1	323	99.69	100		scaffolds_20151360	Escherichia coli (E. coli)		562	SAMEA4350774	PRJEB14873	academisch medisch centrum	2016-12-3	n/a	major	Scaffold	full		100x			GCA_900093835.1	GCF_900093835.1	yes
NZ_FLZB01000265.1	320	100	100		scaffolds_20151360	Escherichia coli (E. coli)		562	SAMEA4350774	PRJEB14873	academisch medisch centrum	2016-12-3	n/a	major	Scaffold	full		100x			GCA_900093835.1	GCF_900093835.1	yes
NZ_FLZB01000267.1	319	99.69	100		scaffolds_20151360	Escherichia coli (E. coli)		562	SAMEA4350774	PRJEB14873	academisch medisch centrum	2016-12-3	n/a	major	Scaffold	full		100x			GCA_900093835.1	GCF_900093835.1	yes
NZ_FLZB01000268.1	319	100	100		scaffolds_20151360	Escherichia coli (E. coli)		562	SAMEA4350774	PRJEB14873	academisch medisch centrum	2016-12-3	n/a	major	Scaffold	full		100x			GCA_900093835.1	GCF_900093835.1	yes
NZ_FLZB01000269.1	318	100	100		scaffolds_20151360	Escherichia coli (E. coli)		562	SAMEA4350774	PRJEB14873	academisch medisch centrum	2016-12-3	n/a	major	Scaffold	full		100x			GCA_900093835.1	GCF_900093835.1	yes
NZ_FLZB01000270.1	318	100	100		scaffolds_20151360	Escherichia coli (E. coli)		562	SAMEA4350774	PRJEB14873	academisch medisch centrum	2016-12-3	n/a	major	Scaffold	full		100x			GCA_900093835.1	GCF_900093835.1	yes
NZ_FLZB01000271.1	318	99.69	100		scaffolds_20151360	Escherichia coli (E. coli)		562	SAMEA4350774	PRJEB14873	academisch medisch centrum	2016-12-3	n/a	major	Scaffold	full		100x			GCA_900093835.1	GCF_900093835.1	yes
NZ_FLZB01000272.1	318	99.69	100		scaffolds_20151360	Escherichia coli (E. coli)		562	SAMEA4350774	PRJEB14873	academisch medisch centrum	2016-12-3	n/a	major	Scaffold	full		100x			GCA_900093835.1	GCF_900093835.1	yes
NZ_FLZB01000273.1	317	100	100		scaffolds_20151360	Escherichia coli (E. coli)		562	SAMEA4350774	PRJEB14873	academisch medisch centrum	2016-12-3	n/a	major	Scaffold	full		100x			GCA_900093835.1	GCF_900093835.1	yes
NZ_FLZB01000274.1	317	99.68	100		scaffolds_20151360	Escherichia coli (E. coli)		562	SAMEA4350774	PRJEB14873	academisch medisch centrum	2016-12-3	n/a	major	Scaffold	full		100x			GCA_900093835.1	GCF_900093835.1	yes
NZ_FLZB01000275.1	316	99.68	100		scaffolds_20151360	Escherichia coli (E. coli)		562	SAMEA4350774	PRJEB14873	academisch medisch centrum	2016-12-3	n/a	major	Scaffold	full		100x			GCA_900093835.1	GCF_900093835.1	yes
NZ_FLZB01000277.1	315	99.68	100	WP_077252398.1	scaffolds_20151360	Escherichia coli (E. coli)		562	SAMEA4350774	PRJEB14873	academisch medisch centrum	2016-12-3	n/a	major	Scaffold	full		100x			GCA_900093835.1	GCF_900093835.1	yes
NZ_FLZB01000278.1	315	100	100	WP_077252399.1	scaffolds_20151360	Escherichia coli (E. coli)		562	SAMEA4350774	PRJEB14873	academisch medisch centrum	2016-12-3	n/a	major	Scaffold	full		100x			GCA_900093835.1	GCF_900093835.1	yes
NZ_FLZB01000279.1	315	99.37	100		scaffolds_20151360	Escherichia coli (E. coli)		562	SAMEA4350774	PRJEB14873	academisch medisch centrum	2016-12-3	n/a	major	Scaffold	full		100x			GCA_900093835.1	GCF_900093835.1	yes
NZ_FLZB01000283.1	309	98.71	100	WP_077252400.1	scaffolds_20151360	Escherichia coli (E. coli)		562	SAMEA4350774	PRJEB14873	academisch medisch centrum	2016-12-3	n/a	major	Scaffold	full		100x			GCA_900093835.1	GCF_900093835.1	yes
NZ_FLZB01000284.1	308	100	100		scaffolds_20151360	Escherichia coli (E. coli)		562	SAMEA4350774	PRJEB14873	academisch medisch centrum	2016-12-3	n/a	major	Scaffold	full		100x			GCA_900093835.1	GCF_900093835.1	yes
NZ_FLZB01000285.1	307	100	100		scaffolds_20151360	Escherichia coli (E. coli)		562	SAMEA4350774	PRJEB14873	academisch medisch centrum	2016-12-3	n/a	major	Scaffold	full		100x			GCA_900093835.1	GCF_900093835.1	yes
NZ_FLZB01000286.1	307	99.35	100		scaffolds_20151360	Escherichia coli (E. coli)		562	SAMEA4350774	PRJEB14873	academisch medisch centrum	2016-12-3	n/a	major	Scaffold	full		100x			GCA_900093835.1	GCF_900093835.1	yes
NZ_FLZB01000287.1	305	100	100		scaffolds_20151360	Escherichia coli (E. coli)		562	SAMEA4350774	PRJEB14873	academisch medisch centrum	2016-12-3	n/a	major	Scaffold	full		100x			GCA_900093835.1	GCF_900093835.1	yes
NZ_FLZB01000289.1	304	100	100		scaffolds_20151360	Escherichia coli (E. coli)		562	SAMEA4350774	PRJEB14873	academisch medisch centrum	2016-12-3	n/a	major	Scaffold	full		100x			GCA_900093835.1	GCF_900093835.1	yes
NZ_FLZB01000290.1	304	99.67	100	WP_077252401.1	scaffolds_20151360	Escherichia coli (E. coli)		562	SAMEA4350774	PRJEB14873	academisch medisch centrum	2016-12-3	n/a	major	Scaffold	full		100x			GCA_900093835.1	GCF_900093835.1	yes
NZ_FLZB01000292.1	302	100	100		scaffolds_20151360	Escherichia coli (E. coli)		562	SAMEA4350774	PRJEB14873	academisch medisch centrum	2016-12-3	n/a	major	Scaffold	full		100x			GCA_900093835.1	GCF_900093835.1	yes
NZ_FLZB01000293.1	302	100	100		scaffolds_20151360	Escherichia coli (E. coli)		562	SAMEA4350774	PRJEB14873	academisch medisch centrum	2016-12-3	n/a	major	Scaffold	full		100x			GCA_900093835.1	GCF_900093835.1	yes
NZ_FLZB01000294.1	300	99.67	100		scaffolds_20151360	Escherichia coli (E. coli)		562	SAMEA4350774	PRJEB14873	academisch medisch centrum	2016-12-3	n/a	major	Scaffold	full		100x			GCA_900093835.1	GCF_900093835.1	yes
NZ_FLZB01000295.1	299	100	100		scaffolds_20151360	Escherichia coli (E. coli)		562	SAMEA4350774	PRJEB14873	academisch medisch centrum	2016-12-3	n/a	major	Scaffold	full		100x			GCA_900093835.1	GCF_900093835.1	yes
NZ_FLZB01000296.1	298	100	100	WP_072820660.1	scaffolds_20151360	Escherichia coli (E. coli)		562	SAMEA4350774	PRJEB14873	academisch medisch centrum	2016-12-3	n/a	major	Scaffold	full		100x			GCA_900093835.1	GCF_900093835.1	yes
NZ_FLZB01000298.1	297	100	100		scaffolds_20151360	Escherichia coli (E. coli)		562	SAMEA4350774	PRJEB14873	academisch medisch centrum	2016-12-3	n/a	major	Scaffold	full		100x			GCA_900093835.1	GCF_900093835.1	yes
NZ_FLZB01000299.1	297	100	99.33	WP_077252402.1	scaffolds_20151360	Escherichia coli (E. coli)		562	SAMEA4350774	PRJEB14873	academisch medisch centrum	2016-12-3	n/a	major	Scaffold	full		100x			GCA_900093835.1	GCF_900093835.1	yes
NZ_FLZB01000300.1	297	100	100		scaffolds_20151360	Escherichia coli (E. coli)		562	SAMEA4350774	PRJEB14873	academisch medisch centrum	2016-12-3	n/a	major	Scaffold	full		100x			GCA_900093835.1	GCF_900093835.1	yes
NZ_FLZB01000301.1	295	99.32	100		scaffolds_20151360	Escherichia coli (E. coli)		562	SAMEA4350774	PRJEB14873	academisch medisch centrum	2016-12-3	n/a	major	Scaffold	full		100x			GCA_900093835.1	GCF_900093835.1	yes
NZ_FLZB01000302.1	295	100	100		scaffolds_20151360	Escherichia coli (E. coli)		562	SAMEA4350774	PRJEB14873	academisch medisch centrum	2016-12-3	n/a	major	Scaffold	full		100x			GCA_900093835.1	GCF_900093835.1	yes
NZ_FLZB01000303.1	295	99.66	100		scaffolds_20151360	Escherichia coli (E. coli)		562	SAMEA4350774	PRJEB14873	academisch medisch centrum	2016-12-3	n/a	major	Scaffold	full		100x			GCA_900093835.1	GCF_900093835.1	yes
NZ_FLZB01000304.1	294	100	100	WP_072820663.1	scaffolds_20151360	Escherichia coli (E. coli)		562	SAMEA4350774	PRJEB14873	academisch medisch centrum	2016-12-3	n/a	major	Scaffold	full		100x			GCA_900093835.1	GCF_900093835.1	yes
NZ_FLZB01000305.1	292	100	100		scaffolds_20151360	Escherichia coli (E. coli)		562	SAMEA4350774	PRJEB14873	academisch medisch centrum	2016-12-3	n/a	major	Scaffold	full		100x			GCA_900093835.1	GCF_900093835.1	yes
NZ_FLZB01000306.1	291	100	100		scaffolds_20151360	Escherichia coli (E. coli)		562	SAMEA4350774	PRJEB14873	academisch medisch centrum	2016-12-3	n/a	major	Scaffold	full		100x			GCA_900093835.1	GCF_900093835.1	yes
NZ_FLZB01000307.1	291	99.32	100		scaffolds_20151360	Escherichia coli (E. coli)		562	SAMEA4350774	PRJEB14873	academisch medisch centrum	2016-12-3	n/a	major	Scaffold	full		100x			GCA_900093835.1	GCF_900093835.1	yes
NZ_FLZB01000308.1	291	99.31	100		scaffolds_20151360	Escherichia coli (E. coli)		562	SAMEA4350774	PRJEB14873	academisch medisch centrum	2016-12-3	n/a	major	Scaffold	full		100x			GCA_900093835.1	GCF_900093835.1	yes
NZ_FLZB01000309.1	289	99.31	100		scaffolds_20151360	Escherichia coli (E. coli)		562	SAMEA4350774	PRJEB14873	academisch medisch centrum	2016-12-3	n/a	major	Scaffold	full		100x			GCA_900093835.1	GCF_900093835.1	yes
NZ_FLZB01000310.1	289	99.65	100		scaffolds_20151360	Escherichia coli (E. coli)		562	SAMEA4350774	PRJEB14873	academisch medisch centrum	2016-12-3	n/a	major	Scaffold	full		100x			GCA_900093835.1	GCF_900093835.1	yes
NZ_FLZB01000311.1	288	100	100		scaffolds_20151360	Escherichia coli (E. coli)		562	SAMEA4350774	PRJEB14873	academisch medisch centrum	2016-12-3	n/a	major	Scaffold	full		100x			GCA_900093835.1	GCF_900093835.1	yes
NZ_FLZB01000312.1	288	99.65	100		scaffolds_20151360	Escherichia coli (E. coli)		562	SAMEA4350774	PRJEB14873	academisch medisch centrum	2016-12-3	n/a	major	Scaffold	full		100x			GCA_900093835.1	GCF_900093835.1	yes
NZ_FLZB01000313.1	287	100	100	WP_077252403.1	scaffolds_20151360	Escherichia coli (E. coli)		562	SAMEA4350774	PRJEB14873	academisch medisch centrum	2016-12-3	n/a	major	Scaffold	full		100x			GCA_900093835.1	GCF_900093835.1	yes
NZ_FLZB01000314.1	287	100	100	WP_077252404.1	scaffolds_20151360	Escherichia coli (E. coli)		562	SAMEA4350774	PRJEB14873	academisch medisch centrum	2016-12-3	n/a	major	Scaffold	full		100x			GCA_900093835.1	GCF_900093835.1	yes
NZ_FLZB01000316.1	285	100	100		scaffolds_20151360	Escherichia coli (E. coli)		562	SAMEA4350774	PRJEB14873	academisch medisch centrum	2016-12-3	n/a	major	Scaffold	full		100x			GCA_900093835.1	GCF_900093835.1	yes
NZ_FLZB01000317.1	283	100	100		scaffolds_20151360	Escherichia coli (E. coli)		562	SAMEA4350774	PRJEB14873	academisch medisch centrum	2016-12-3	n/a	major	Scaffold	full		100x			GCA_900093835.1	GCF_900093835.1	yes
NZ_FLZB01000318.1	283	100	100		scaffolds_20151360	Escherichia coli (E. coli)		562	SAMEA4350774	PRJEB14873	academisch medisch centrum	2016-12-3	n/a	major	Scaffold	full		100x			GCA_900093835.1	GCF_900093835.1	yes
NZ_FLZB01000319.1	283	99.3	100	WP_077252405.1	scaffolds_20151360	Escherichia coli (E. coli)		562	SAMEA4350774	PRJEB14873	academisch medisch centrum	2016-12-3	n/a	major	Scaffold	full		100x			GCA_900093835.1	GCF_900093835.1	yes
NZ_FLZB01000320.1	283	100	100		scaffolds_20151360	Escherichia coli (E. coli)		562	SAMEA4350774	PRJEB14873	academisch medisch centrum	2016-12-3	n/a	major	Scaffold	full		100x			GCA_900093835.1	GCF_900093835.1	yes
NZ_FLZB01000322.1	282	100	100		scaffolds_20151360	Escherichia coli (E. coli)		562	SAMEA4350774	PRJEB14873	academisch medisch centrum	2016-12-3	n/a	major	Scaffold	full		100x			GCA_900093835.1	GCF_900093835.1	yes
NZ_FLZB01000323.1	282	99.65	100		scaffolds_20151360	Escherichia coli (E. coli)		562	SAMEA4350774	PRJEB14873	academisch medisch centrum	2016-12-3	n/a	major	Scaffold	full		100x			GCA_900093835.1	GCF_900093835.1	yes
NZ_FLZB01000325.1	280	100	100		scaffolds_20151360	Escherichia coli (E. coli)		562	SAMEA4350774	PRJEB14873	academisch medisch centrum	2016-12-3	n/a	major	Scaffold	full		100x			GCA_900093835.1	GCF_900093835.1	yes
NZ_FLZB01000329.1	278	100	100		scaffolds_20151360	Escherichia coli (E. coli)		562	SAMEA4350774	PRJEB14873	academisch medisch centrum	2016-12-3	n/a	major	Scaffold	full		100x			GCA_900093835.1	GCF_900093835.1	yes
NZ_FLZB01000330.1	278	100	100		scaffolds_20151360	Escherichia coli (E. coli)		562	SAMEA4350774	PRJEB14873	academisch medisch centrum	2016-12-3	n/a	major	Scaffold	full		100x			GCA_900093835.1	GCF_900093835.1	yes
NZ_FLZB01000331.1	278	100	100		scaffolds_20151360	Escherichia coli (E. coli)		562	SAMEA4350774	PRJEB14873	academisch medisch centrum	2016-12-3	n/a	major	Scaffold	full		100x			GCA_900093835.1	GCF_900093835.1	yes
NZ_FLZB01000332.1	278	99.64	100		scaffolds_20151360	Escherichia coli (E. coli)		562	SAMEA4350774	PRJEB14873	academisch medisch centrum	2016-12-3	n/a	major	Scaffold	full		100x			GCA_900093835.1	GCF_900093835.1	yes
NZ_FLZB01000333.1	278	100	100		scaffolds_20151360	Escherichia coli (E. coli)		562	SAMEA4350774	PRJEB14873	academisch medisch centrum	2016-12-3	n/a	major	Scaffold	full		100x			GCA_900093835.1	GCF_900093835.1	yes
NZ_FLZB01000334.1	278	98.56	100		scaffolds_20151360	Escherichia coli (E. coli)		562	SAMEA4350774	PRJEB14873	academisch medisch centrum	2016-12-3	n/a	major	Scaffold	full		100x			GCA_900093835.1	GCF_900093835.1	yes
NZ_FLZB01000335.1	277	96.42	100		scaffolds_20151360	Escherichia coli (E. coli)		562	SAMEA4350774	PRJEB14873	academisch medisch centrum	2016-12-3	n/a	major	Scaffold	full		100x			GCA_900093835.1	GCF_900093835.1	yes
NZ_FLZB01000336.1	276	100	100		scaffolds_20151360	Escherichia coli (E. coli)		562	SAMEA4350774	PRJEB14873	academisch medisch centrum	2016-12-3	n/a	major	Scaffold	full		100x			GCA_900093835.1	GCF_900093835.1	yes
NZ_FLZB01000337.1	275	100	100		scaffolds_20151360	Escherichia coli (E. coli)		562	SAMEA4350774	PRJEB14873	academisch medisch centrum	2016-12-3	n/a	major	Scaffold	full		100x			GCA_900093835.1	GCF_900093835.1	yes
NZ_FLZB01000338.1	273	100	100		scaffolds_20151360	Escherichia coli (E. coli)		562	SAMEA4350774	PRJEB14873	academisch medisch centrum	2016-12-3	n/a	major	Scaffold	full		100x			GCA_900093835.1	GCF_900093835.1	yes
NZ_FLZB01000339.1	273	99.27	100	WP_072820675.1	scaffolds_20151360	Escherichia coli (E. coli)		562	SAMEA4350774	PRJEB14873	academisch medisch centrum	2016-12-3	n/a	major	Scaffold	full		100x			GCA_900093835.1	GCF_900093835.1	yes
NZ_FLZB01000340.1	273	99.27	100		scaffolds_20151360	Escherichia coli (E. coli)		562	SAMEA4350774	PRJEB14873	academisch medisch centrum	2016-12-3	n/a	major	Scaffold	full		100x			GCA_900093835.1	GCF_900093835.1	yes
NZ_FLZB01000341.1	272	99.63	100		scaffolds_20151360	Escherichia coli (E. coli)		562	SAMEA4350774	PRJEB14873	academisch medisch centrum	2016-12-3	n/a	major	Scaffold	full		100x			GCA_900093835.1	GCF_900093835.1	yes
NZ_FLZB01000342.1	272	99.26	100		scaffolds_20151360	Escherichia coli (E. coli)		562	SAMEA4350774	PRJEB14873	academisch medisch centrum	2016-12-3	n/a	major	Scaffold	full		100x			GCA_900093835.1	GCF_900093835.1	yes
NZ_FLZB01000343.1	272	100	100		scaffolds_20151360	Escherichia coli (E. coli)		562	SAMEA4350774	PRJEB14873	academisch medisch centrum	2016-12-3	n/a	major	Scaffold	full		100x			GCA_900093835.1	GCF_900093835.1	yes
NZ_FLZB01000344.1	271	100	100		scaffolds_20151360	Escherichia coli (E. coli)		562	SAMEA4350774	PRJEB14873	academisch medisch centrum	2016-12-3	n/a	major	Scaffold	full		100x			GCA_900093835.1	GCF_900093835.1	yes
NZ_FLZB01000345.1	271	100	100		scaffolds_20151360	Escherichia coli (E. coli)		562	SAMEA4350774	PRJEB14873	academisch medisch centrum	2016-12-3	n/a	major	Scaffold	full		100x			GCA_900093835.1	GCF_900093835.1	yes
NZ_FLZB01000348.1	270	100	100		scaffolds_20151360	Escherichia coli (E. coli)		562	SAMEA4350774	PRJEB14873	academisch medisch centrum	2016-12-3	n/a	major	Scaffold	full		100x			GCA_900093835.1	GCF_900093835.1	yes
NZ_FLZB01000350.1	270	100	100		scaffolds_20151360	Escherichia coli (E. coli)		562	SAMEA4350774	PRJEB14873	academisch medisch centrum	2016-12-3	n/a	major	Scaffold	full		100x			GCA_900093835.1	GCF_900093835.1	yes
NZ_FLZB01000351.1	269	99.26	100		scaffolds_20151360	Escherichia coli (E. coli)		562	SAMEA4350774	PRJEB14873	academisch medisch centrum	2016-12-3	n/a	major	Scaffold	full		100x			GCA_900093835.1	GCF_900093835.1	yes
NZ_FLZB01000352.1	269	99.26	100		scaffolds_20151360	Escherichia coli (E. coli)		562	SAMEA4350774	PRJEB14873	academisch medisch centrum	2016-12-3	n/a	major	Scaffold	full		100x			GCA_900093835.1	GCF_900093835.1	yes
NZ_FLZB01000353.1	268	100	100	WP_077252407.1	scaffolds_20151360	Escherichia coli (E. coli)		562	SAMEA4350774	PRJEB14873	academisch medisch centrum	2016-12-3	n/a	major	Scaffold	full		100x			GCA_900093835.1	GCF_900093835.1	yes
NZ_FLZB01000354.1	268	99.63	100		scaffolds_20151360	Escherichia coli (E. coli)		562	SAMEA4350774	PRJEB14873	academisch medisch centrum	2016-12-3	n/a	major	Scaffold	full		100x			GCA_900093835.1	GCF_900093835.1	yes
NZ_FLZB01000355.1	268	99.25	100		scaffolds_20151360	Escherichia coli (E. coli)		562	SAMEA4350774	PRJEB14873	academisch medisch centrum	2016-12-3	n/a	major	Scaffold	full		100x			GCA_900093835.1	GCF_900093835.1	yes
NZ_FLZB01000356.1	267	100	100		scaffolds_20151360	Escherichia coli (E. coli)		562	SAMEA4350774	PRJEB14873	academisch medisch centrum	2016-12-3	n/a	major	Scaffold	full		100x			GCA_900093835.1	GCF_900093835.1	yes
NZ_FLZB01000359.1	266	100	98.87		scaffolds_20151360	Escherichia coli (E. coli)		562	SAMEA4350774	PRJEB14873	academisch medisch centrum	2016-12-3	n/a	major	Scaffold	full		100x			GCA_900093835.1	GCF_900093835.1	yes
NZ_FLZB01000360.1	266	100	100		scaffolds_20151360	Escherichia coli (E. coli)		562	SAMEA4350774	PRJEB14873	academisch medisch centrum	2016-12-3	n/a	major	Scaffold	full		100x			GCA_900093835.1	GCF_900093835.1	yes
NZ_FLZB01000361.1	266	99.62	100		scaffolds_20151360	Escherichia coli (E. coli)		562	SAMEA4350774	PRJEB14873	academisch medisch centrum	2016-12-3	n/a	major	Scaffold	full		100x			GCA_900093835.1	GCF_900093835.1	yes
NZ_FLZB01000363.1	265	99.62	100		scaffolds_20151360	Escherichia coli (E. coli)		562	SAMEA4350774	PRJEB14873	academisch medisch centrum	2016-12-3	n/a	major	Scaffold	full		100x			GCA_900093835.1	GCF_900093835.1	yes
NZ_FLZB01000364.1	265	99.25	100		scaffolds_20151360	Escherichia coli (E. coli)		562	SAMEA4350774	PRJEB14873	academisch medisch centrum	2016-12-3	n/a	major	Scaffold	full		100x			GCA_900093835.1	GCF_900093835.1	yes
NZ_FLZB01000365.1	265	99.62	100		scaffolds_20151360	Escherichia coli (E. coli)		562	SAMEA4350774	PRJEB14873	academisch medisch centrum	2016-12-3	n/a	major	Scaffold	full		100x			GCA_900093835.1	GCF_900093835.1	yes
NZ_FLZB01000366.1	265	100	100		scaffolds_20151360	Escherichia coli (E. coli)		562	SAMEA4350774	PRJEB14873	academisch medisch centrum	2016-12-3	n/a	major	Scaffold	full		100x			GCA_900093835.1	GCF_900093835.1	yes
NZ_FLZB01000368.1	264	100	100		scaffolds_20151360	Escherichia coli (E. coli)		562	SAMEA4350774	PRJEB14873	academisch medisch centrum	2016-12-3	n/a	major	Scaffold	full		100x			GCA_900093835.1	GCF_900093835.1	yes
NZ_FLZB01000369.1	264	100	100		scaffolds_20151360	Escherichia coli (E. coli)		562	SAMEA4350774	PRJEB14873	academisch medisch centrum	2016-12-3	n/a	major	Scaffold	full		100x			GCA_900093835.1	GCF_900093835.1	yes
NZ_FLZB01000370.1	263	100	100	WP_077251389.1	scaffolds_20151360	Escherichia coli (E. coli)		562	SAMEA4350774	PRJEB14873	academisch medisch centrum	2016-12-3	n/a	major	Scaffold	full		100x			GCA_900093835.1	GCF_900093835.1	yes
NZ_FLZB01000371.1	263	100	100		scaffolds_20151360	Escherichia coli (E. coli)		562	SAMEA4350774	PRJEB14873	academisch medisch centrum	2016-12-3	n/a	major	Scaffold	full		100x			GCA_900093835.1	GCF_900093835.1	yes
NZ_FLZB01000372.1	263	100	100		scaffolds_20151360	Escherichia coli (E. coli)		562	SAMEA4350774	PRJEB14873	academisch medisch centrum	2016-12-3	n/a	major	Scaffold	full		100x			GCA_900093835.1	GCF_900093835.1	yes
NZ_FLZB01000373.1	263	100	100		scaffolds_20151360	Escherichia coli (E. coli)		562	SAMEA4350774	PRJEB14873	academisch medisch centrum	2016-12-3	n/a	major	Scaffold	full		100x			GCA_900093835.1	GCF_900093835.1	yes
NZ_FLZB01000375.1	261	99.23	100		scaffolds_20151360	Escherichia coli (E. coli)		562	SAMEA4350774	PRJEB14873	academisch medisch centrum	2016-12-3	n/a	major	Scaffold	full		100x			GCA_900093835.1	GCF_900093835.1	yes
NZ_FLZB01000376.1	261	99.23	100		scaffolds_20151360	Escherichia coli (E. coli)		562	SAMEA4350774	PRJEB14873	academisch medisch centrum	2016-12-3	n/a	major	Scaffold	full		100x			GCA_900093835.1	GCF_900093835.1	yes
NZ_FLZB01000377.1	260	99.62	100		scaffolds_20151360	Escherichia coli (E. coli)		562	SAMEA4350774	PRJEB14873	academisch medisch centrum	2016-12-3	n/a	major	Scaffold	full		100x			GCA_900093835.1	GCF_900093835.1	yes
NZ_FLZB01000379.1	259	100	100		scaffolds_20151360	Escherichia coli (E. coli)		562	SAMEA4350774	PRJEB14873	academisch medisch centrum	2016-12-3	n/a	major	Scaffold	full		100x			GCA_900093835.1	GCF_900093835.1	yes
NZ_FLZB01000380.1	259	100	100		scaffolds_20151360	Escherichia coli (E. coli)		562	SAMEA4350774	PRJEB14873	academisch medisch centrum	2016-12-3	n/a	major	Scaffold	full		100x			GCA_900093835.1	GCF_900093835.1	yes
NZ_FLZB01000381.1	259	100	100		scaffolds_20151360	Escherichia coli (E. coli)		562	SAMEA4350774	PRJEB14873	academisch medisch centrum	2016-12-3	n/a	major	Scaffold	full		100x			GCA_900093835.1	GCF_900093835.1	yes
NZ_FLZB01000382.1	259	100	100		scaffolds_20151360	Escherichia coli (E. coli)		562	SAMEA4350774	PRJEB14873	academisch medisch centrum	2016-12-3	n/a	major	Scaffold	full		100x			GCA_900093835.1	GCF_900093835.1	yes
NZ_FLZB01000383.1	259	100	100		scaffolds_20151360	Escherichia coli (E. coli)		562	SAMEA4350774	PRJEB14873	academisch medisch centrum	2016-12-3	n/a	major	Scaffold	full		100x			GCA_900093835.1	GCF_900093835.1	yes
NZ_FLZB01000384.1	259	99.23	100		scaffolds_20151360	Escherichia coli (E. coli)		562	SAMEA4350774	PRJEB14873	academisch medisch centrum	2016-12-3	n/a	major	Scaffold	full		100x			GCA_900093835.1	GCF_900093835.1	yes
NZ_FLZB01000385.1	258	100	100		scaffolds_20151360	Escherichia coli (E. coli)		562	SAMEA4350774	PRJEB14873	academisch medisch centrum	2016-12-3	n/a	major	Scaffold	full		100x			GCA_900093835.1	GCF_900093835.1	yes
NZ_FLZB01000386.1	257	100	100		scaffolds_20151360	Escherichia coli (E. coli)		562	SAMEA4350774	PRJEB14873	academisch medisch centrum	2016-12-3	n/a	major	Scaffold	full		100x			GCA_900093835.1	GCF_900093835.1	yes
NZ_FLZB01000387.1	257	100	100		scaffolds_20151360	Escherichia coli (E. coli)		562	SAMEA4350774	PRJEB14873	academisch medisch centrum	2016-12-3	n/a	major	Scaffold	full		100x			GCA_900093835.1	GCF_900093835.1	yes
NZ_FLZB01000389.1	256	100	100		scaffolds_20151360	Escherichia coli (E. coli)		562	SAMEA4350774	PRJEB14873	academisch medisch centrum	2016-12-3	n/a	major	Scaffold	full		100x			GCA_900093835.1	GCF_900093835.1	yes
NZ_FLZB01000390.1	255	100	100		scaffolds_20151360	Escherichia coli (E. coli)		562	SAMEA4350774	PRJEB14873	academisch medisch centrum	2016-12-3	n/a	major	Scaffold	full		100x			GCA_900093835.1	GCF_900093835.1	yes
NZ_FLZB01000391.1	255	100	100		scaffolds_20151360	Escherichia coli (E. coli)		562	SAMEA4350774	PRJEB14873	academisch medisch centrum	2016-12-3	n/a	major	Scaffold	full		100x			GCA_900093835.1	GCF_900093835.1	yes
NZ_FLZB01000392.1	255	100	100		scaffolds_20151360	Escherichia coli (E. coli)		562	SAMEA4350774	PRJEB14873	academisch medisch centrum	2016-12-3	n/a	major	Scaffold	full		100x			GCA_900093835.1	GCF_900093835.1	yes
NZ_FLZB01000393.1	255	100	99.61		scaffolds_20151360	Escherichia coli (E. coli)		562	SAMEA4350774	PRJEB14873	academisch medisch centrum	2016-12-3	n/a	major	Scaffold	full		100x			GCA_900093835.1	GCF_900093835.1	yes
NZ_FLZB01000394.1	255	100	100		scaffolds_20151360	Escherichia coli (E. coli)		562	SAMEA4350774	PRJEB14873	academisch medisch centrum	2016-12-3	n/a	major	Scaffold	full		100x			GCA_900093835.1	GCF_900093835.1	yes
NZ_FLZB01000397.1	254	99.61	100		scaffolds_20151360	Escherichia coli (E. coli)		562	SAMEA4350774	PRJEB14873	academisch medisch centrum	2016-12-3	n/a	major	Scaffold	full		100x			GCA_900093835.1	GCF_900093835.1	yes
NZ_FLZB01000399.1	253	100	100		scaffolds_20151360	Escherichia coli (E. coli)		562	SAMEA4350774	PRJEB14873	academisch medisch centrum	2016-12-3	n/a	major	Scaffold	full		100x			GCA_900093835.1	GCF_900093835.1	yes
NZ_FLZB01000400.1	253	100	100		scaffolds_20151360	Escherichia coli (E. coli)		562	SAMEA4350774	PRJEB14873	academisch medisch centrum	2016-12-3	n/a	major	Scaffold	full		100x			GCA_900093835.1	GCF_900093835.1	yes
NZ_FLZB01000401.1	253	99.6	100		scaffolds_20151360	Escherichia coli (E. coli)		562	SAMEA4350774	PRJEB14873	academisch medisch centrum	2016-12-3	n/a	major	Scaffold	full		100x			GCA_900093835.1	GCF_900093835.1	yes
NZ_FLZB01000402.1	252	100	100		scaffolds_20151360	Escherichia coli (E. coli)		562	SAMEA4350774	PRJEB14873	academisch medisch centrum	2016-12-3	n/a	major	Scaffold	full		100x			GCA_900093835.1	GCF_900093835.1	yes
NZ_FLZB01000403.1	252	100	100		scaffolds_20151360	Escherichia coli (E. coli)		562	SAMEA4350774	PRJEB14873	academisch medisch centrum	2016-12-3	n/a	major	Scaffold	full		100x			GCA_900093835.1	GCF_900093835.1	yes
NZ_FLZB01000404.1	252	100	100		scaffolds_20151360	Escherichia coli (E. coli)		562	SAMEA4350774	PRJEB14873	academisch medisch centrum	2016-12-3	n/a	major	Scaffold	full		100x			GCA_900093835.1	GCF_900093835.1	yes
NZ_FLZB01000406.1	252	100	100		scaffolds_20151360	Escherichia coli (E. coli)		562	SAMEA4350774	PRJEB14873	academisch medisch centrum	2016-12-3	n/a	major	Scaffold	full		100x			GCA_900093835.1	GCF_900093835.1	yes
NZ_FLZB01000407.1	251	99.6	100		scaffolds_20151360	Escherichia coli (E. coli)		562	SAMEA4350774	PRJEB14873	academisch medisch centrum	2016-12-3	n/a	major	Scaffold	full		100x			GCA_900093835.1	GCF_900093835.1	yes
NZ_FLZB01000408.1	251	100	100		scaffolds_20151360	Escherichia coli (E. coli)		562	SAMEA4350774	PRJEB14873	academisch medisch centrum	2016-12-3	n/a	major	Scaffold	full		100x			GCA_900093835.1	GCF_900093835.1	yes
NZ_FLZB01000409.1	251	100	100		scaffolds_20151360	Escherichia coli (E. coli)		562	SAMEA4350774	PRJEB14873	academisch medisch centrum	2016-12-3	n/a	major	Scaffold	full		100x			GCA_900093835.1	GCF_900093835.1	yes
NZ_FLZB01000410.1	251	100	100		scaffolds_20151360	Escherichia coli (E. coli)		562	SAMEA4350774	PRJEB14873	academisch medisch centrum	2016-12-3	n/a	major	Scaffold	full		100x			GCA_900093835.1	GCF_900093835.1	yes
NZ_FLZB01000411.1	250	100	100		scaffolds_20151360	Escherichia coli (E. coli)		562	SAMEA4350774	PRJEB14873	academisch medisch centrum	2016-12-3	n/a	major	Scaffold	full		100x			GCA_900093835.1	GCF_900093835.1	yes
NZ_FLZB01000412.1	250	100	100		scaffolds_20151360	Escherichia coli (E. coli)		562	SAMEA4350774	PRJEB14873	academisch medisch centrum	2016-12-3	n/a	major	Scaffold	full		100x			GCA_900093835.1	GCF_900093835.1	yes
NZ_FLZB01000413.1	249	100	100		scaffolds_20151360	Escherichia coli (E. coli)		562	SAMEA4350774	PRJEB14873	academisch medisch centrum	2016-12-3	n/a	major	Scaffold	full		100x			GCA_900093835.1	GCF_900093835.1	yes
NZ_FLZB01000414.1	249	100	100		scaffolds_20151360	Escherichia coli (E. coli)		562	SAMEA4350774	PRJEB14873	academisch medisch centrum	2016-12-3	n/a	major	Scaffold	full		100x			GCA_900093835.1	GCF_900093835.1	yes
NZ_FLZB01000415.1	249	100	100		scaffolds_20151360	Escherichia coli (E. coli)		562	SAMEA4350774	PRJEB14873	academisch medisch centrum	2016-12-3	n/a	major	Scaffold	full		100x			GCA_900093835.1	GCF_900093835.1	yes
NZ_FLZB01000417.1	249	99.6	100		scaffolds_20151360	Escherichia coli (E. coli)		562	SAMEA4350774	PRJEB14873	academisch medisch centrum	2016-12-3	n/a	major	Scaffold	full		100x			GCA_900093835.1	GCF_900093835.1	yes
NZ_FLZB01000419.1	248	100	100		scaffolds_20151360	Escherichia coli (E. coli)		562	SAMEA4350774	PRJEB14873	academisch medisch centrum	2016-12-3	n/a	major	Scaffold	full		100x			GCA_900093835.1	GCF_900093835.1	yes
NZ_FLZB01000420.1	248	99.6	100		scaffolds_20151360	Escherichia coli (E. coli)		562	SAMEA4350774	PRJEB14873	academisch medisch centrum	2016-12-3	n/a	major	Scaffold	full		100x			GCA_900093835.1	GCF_900093835.1	yes
NZ_FLZB01000421.1	248	99.6	100		scaffolds_20151360	Escherichia coli (E. coli)		562	SAMEA4350774	PRJEB14873	academisch medisch centrum	2016-12-3	n/a	major	Scaffold	full		100x			GCA_900093835.1	GCF_900093835.1	yes
NZ_FLZB01000422.1	247	100	100		scaffolds_20151360	Escherichia coli (E. coli)		562	SAMEA4350774	PRJEB14873	academisch medisch centrum	2016-12-3	n/a	major	Scaffold	full		100x			GCA_900093835.1	GCF_900093835.1	yes
NZ_FLZB01000424.1	247	99.19	100		scaffolds_20151360	Escherichia coli (E. coli)		562	SAMEA4350774	PRJEB14873	academisch medisch centrum	2016-12-3	n/a	major	Scaffold	full		100x			GCA_900093835.1	GCF_900093835.1	yes
NZ_FLZB01000428.1	245	100	100		scaffolds_20151360	Escherichia coli (E. coli)		562	SAMEA4350774	PRJEB14873	academisch medisch centrum	2016-12-3	n/a	major	Scaffold	full		100x			GCA_900093835.1	GCF_900093835.1	yes
NZ_FLZB01000429.1	245	99.59	100		scaffolds_20151360	Escherichia coli (E. coli)		562	SAMEA4350774	PRJEB14873	academisch medisch centrum	2016-12-3	n/a	major	Scaffold	full		100x			GCA_900093835.1	GCF_900093835.1	yes
NZ_FLZB01000430.1	244	100	100		scaffolds_20151360	Escherichia coli (E. coli)		562	SAMEA4350774	PRJEB14873	academisch medisch centrum	2016-12-3	n/a	major	Scaffold	full		100x			GCA_900093835.1	GCF_900093835.1	yes
NZ_FLZB01000431.1	244	100	100		scaffolds_20151360	Escherichia coli (E. coli)		562	SAMEA4350774	PRJEB14873	academisch medisch centrum	2016-12-3	n/a	major	Scaffold	full		100x			GCA_900093835.1	GCF_900093835.1	yes
NZ_FLZB01000432.1	243	99.59	100		scaffolds_20151360	Escherichia coli (E. coli)		562	SAMEA4350774	PRJEB14873	academisch medisch centrum	2016-12-3	n/a	major	Scaffold	full		100x			GCA_900093835.1	GCF_900093835.1	yes
NZ_FLZB01000433.1	242	100	100		scaffolds_20151360	Escherichia coli (E. coli)		562	SAMEA4350774	PRJEB14873	academisch medisch centrum	2016-12-3	n/a	major	Scaffold	full		100x			GCA_900093835.1	GCF_900093835.1	yes
NZ_FLZB01000434.1	242	100	100		scaffolds_20151360	Escherichia coli (E. coli)		562	SAMEA4350774	PRJEB14873	academisch medisch centrum	2016-12-3	n/a	major	Scaffold	full		100x			GCA_900093835.1	GCF_900093835.1	yes
NZ_FLZB01000435.1	242	100	100	WP_072820683.1	scaffolds_20151360	Escherichia coli (E. coli)		562	SAMEA4350774	PRJEB14873	academisch medisch centrum	2016-12-3	n/a	major	Scaffold	full		100x			GCA_900093835.1	GCF_900093835.1	yes
NZ_FLZB01000436.1	242	99.59	100		scaffolds_20151360	Escherichia coli (E. coli)		562	SAMEA4350774	PRJEB14873	academisch medisch centrum	2016-12-3	n/a	major	Scaffold	full		100x			GCA_900093835.1	GCF_900093835.1	yes
NZ_FLZB01000437.1	241	99.17	100		scaffolds_20151360	Escherichia coli (E. coli)		562	SAMEA4350774	PRJEB14873	academisch medisch centrum	2016-12-3	n/a	major	Scaffold	full		100x			GCA_900093835.1	GCF_900093835.1	yes
NZ_FLZB01000438.1	241	100	100		scaffolds_20151360	Escherichia coli (E. coli)		562	SAMEA4350774	PRJEB14873	academisch medisch centrum	2016-12-3	n/a	major	Scaffold	full		100x			GCA_900093835.1	GCF_900093835.1	yes
NZ_FLZB01000439.1	241	100	100		scaffolds_20151360	Escherichia coli (E. coli)		562	SAMEA4350774	PRJEB14873	academisch medisch centrum	2016-12-3	n/a	major	Scaffold	full		100x			GCA_900093835.1	GCF_900093835.1	yes
NZ_FLZB01000441.1	240	99.59	100		scaffolds_20151360	Escherichia coli (E. coli)		562	SAMEA4350774	PRJEB14873	academisch medisch centrum	2016-12-3	n/a	major	Scaffold	full		100x			GCA_900093835.1	GCF_900093835.1	yes
NZ_FLZB01000442.1	240	99.58	100		scaffolds_20151360	Escherichia coli (E. coli)		562	SAMEA4350774	PRJEB14873	academisch medisch centrum	2016-12-3	n/a	major	Scaffold	full		100x			GCA_900093835.1	GCF_900093835.1	yes
NZ_FLZB01000443.1	240	99.14	96.67		scaffolds_20151360	Escherichia coli (E. coli)		562	SAMEA4350774	PRJEB14873	academisch medisch centrum	2016-12-3	n/a	major	Scaffold	full		100x			GCA_900093835.1	GCF_900093835.1	yes
NZ_FLZB01000444.1	239	99.58	100		scaffolds_20151360	Escherichia coli (E. coli)		562	SAMEA4350774	PRJEB14873	academisch medisch centrum	2016-12-3	n/a	major	Scaffold	full		100x			GCA_900093835.1	GCF_900093835.1	yes
NZ_FLZB01000445.1	239	100	100		scaffolds_20151360	Escherichia coli (E. coli)		562	SAMEA4350774	PRJEB14873	academisch medisch centrum	2016-12-3	n/a	major	Scaffold	full		100x			GCA_900093835.1	GCF_900093835.1	yes
NZ_FLZB01000447.1	238	100	100		scaffolds_20151360	Escherichia coli (E. coli)		562	SAMEA4350774	PRJEB14873	academisch medisch centrum	2016-12-3	n/a	major	Scaffold	full		100x			GCA_900093835.1	GCF_900093835.1	yes
NZ_FLZB01000448.1	238	100	100		scaffolds_20151360	Escherichia coli (E. coli)		562	SAMEA4350774	PRJEB14873	academisch medisch centrum	2016-12-3	n/a	major	Scaffold	full		100x			GCA_900093835.1	GCF_900093835.1	yes
NZ_FLZB01000449.1	238	100	100		scaffolds_20151360	Escherichia coli (E. coli)		562	SAMEA4350774	PRJEB14873	academisch medisch centrum	2016-12-3	n/a	major	Scaffold	full		100x			GCA_900093835.1	GCF_900093835.1	yes
NZ_FLZB01000451.1	237	100	100		scaffolds_20151360	Escherichia coli (E. coli)		562	SAMEA4350774	PRJEB14873	academisch medisch centrum	2016-12-3	n/a	major	Scaffold	full		100x			GCA_900093835.1	GCF_900093835.1	yes
NZ_FLZB01000452.1	236	100	100		scaffolds_20151360	Escherichia coli (E. coli)		562	SAMEA4350774	PRJEB14873	academisch medisch centrum	2016-12-3	n/a	major	Scaffold	full		100x			GCA_900093835.1	GCF_900093835.1	yes
NZ_FLZB01000453.1	236	100	100		scaffolds_20151360	Escherichia coli (E. coli)		562	SAMEA4350774	PRJEB14873	academisch medisch centrum	2016-12-3	n/a	major	Scaffold	full		100x			GCA_900093835.1	GCF_900093835.1	yes
NZ_FLZB01000454.1	236	100	100		scaffolds_20151360	Escherichia coli (E. coli)		562	SAMEA4350774	PRJEB14873	academisch medisch centrum	2016-12-3	n/a	major	Scaffold	full		100x			GCA_900093835.1	GCF_900093835.1	yes
NZ_FLZB01000456.1	236	100	100		scaffolds_20151360	Escherichia coli (E. coli)		562	SAMEA4350774	PRJEB14873	academisch medisch centrum	2016-12-3	n/a	major	Scaffold	full		100x			GCA_900093835.1	GCF_900093835.1	yes
NZ_FLZB01000458.1	235	100	100		scaffolds_20151360	Escherichia coli (E. coli)		562	SAMEA4350774	PRJEB14873	academisch medisch centrum	2016-12-3	n/a	major	Scaffold	full		100x			GCA_900093835.1	GCF_900093835.1	yes
NZ_FLZB01000459.1	235	100	100		scaffolds_20151360	Escherichia coli (E. coli)		562	SAMEA4350774	PRJEB14873	academisch medisch centrum	2016-12-3	n/a	major	Scaffold	full		100x			GCA_900093835.1	GCF_900093835.1	yes
NZ_FLZB01000460.1	235	99.57	100		scaffolds_20151360	Escherichia coli (E. coli)		562	SAMEA4350774	PRJEB14873	academisch medisch centrum	2016-12-3	n/a	major	Scaffold	full		100x			GCA_900093835.1	GCF_900093835.1	yes
NZ_FLZB01000463.1	234	99.57	100		scaffolds_20151360	Escherichia coli (E. coli)		562	SAMEA4350774	PRJEB14873	academisch medisch centrum	2016-12-3	n/a	major	Scaffold	full		100x			GCA_900093835.1	GCF_900093835.1	yes
NZ_FLZB01000464.1	233	100	100		scaffolds_20151360	Escherichia coli (E. coli)		562	SAMEA4350774	PRJEB14873	academisch medisch centrum	2016-12-3	n/a	major	Scaffold	full		100x			GCA_900093835.1	GCF_900093835.1	yes
NZ_FLZB01000465.1	233	99.14	100		scaffolds_20151360	Escherichia coli (E. coli)		562	SAMEA4350774	PRJEB14873	academisch medisch centrum	2016-12-3	n/a	major	Scaffold	full		100x			GCA_900093835.1	GCF_900093835.1	yes
NZ_FLZB01000466.1	233	100	100		scaffolds_20151360	Escherichia coli (E. coli)		562	SAMEA4350774	PRJEB14873	academisch medisch centrum	2016-12-3	n/a	major	Scaffold	full		100x			GCA_900093835.1	GCF_900093835.1	yes
NZ_FLZB01000468.1	233	98.28	100		scaffolds_20151360	Escherichia coli (E. coli)		562	SAMEA4350774	PRJEB14873	academisch medisch centrum	2016-12-3	n/a	major	Scaffold	full		100x			GCA_900093835.1	GCF_900093835.1	yes
NZ_FLZB01000469.1	232	99.57	100		scaffolds_20151360	Escherichia coli (E. coli)		562	SAMEA4350774	PRJEB14873	academisch medisch centrum	2016-12-3	n/a	major	Scaffold	full		100x			GCA_900093835.1	GCF_900093835.1	yes
NZ_FLZB01000470.1	232	100	98.71		scaffolds_20151360	Escherichia coli (E. coli)		562	SAMEA4350774	PRJEB14873	academisch medisch centrum	2016-12-3	n/a	major	Scaffold	full		100x			GCA_900093835.1	GCF_900093835.1	yes
NZ_FLZB01000471.1	232	99.57	100		scaffolds_20151360	Escherichia coli (E. coli)		562	SAMEA4350774	PRJEB14873	academisch medisch centrum	2016-12-3	n/a	major	Scaffold	full		100x			GCA_900093835.1	GCF_900093835.1	yes
NZ_FLZB01000472.1	231	99.57	100		scaffolds_20151360	Escherichia coli (E. coli)		562	SAMEA4350774	PRJEB14873	academisch medisch centrum	2016-12-3	n/a	major	Scaffold	full		100x			GCA_900093835.1	GCF_900093835.1	yes
NZ_FLZB01000474.1	230	99.57	100		scaffolds_20151360	Escherichia coli (E. coli)		562	SAMEA4350774	PRJEB14873	academisch medisch centrum	2016-12-3	n/a	major	Scaffold	full		100x			GCA_900093835.1	GCF_900093835.1	yes
NZ_FLZB01000475.1	230	100	100		scaffolds_20151360	Escherichia coli (E. coli)		562	SAMEA4350774	PRJEB14873	academisch medisch centrum	2016-12-3	n/a	major	Scaffold	full		100x			GCA_900093835.1	GCF_900093835.1	yes
NZ_FLZB01000476.1	230	100	100		scaffolds_20151360	Escherichia coli (E. coli)		562	SAMEA4350774	PRJEB14873	academisch medisch centrum	2016-12-3	n/a	major	Scaffold	full		100x			GCA_900093835.1	GCF_900093835.1	yes
NZ_FLZB01000477.1	230	100	100		scaffolds_20151360	Escherichia coli (E. coli)		562	SAMEA4350774	PRJEB14873	academisch medisch centrum	2016-12-3	n/a	major	Scaffold	full		100x			GCA_900093835.1	GCF_900093835.1	yes
NZ_FLZB01000478.1	230	100	100		scaffolds_20151360	Escherichia coli (E. coli)		562	SAMEA4350774	PRJEB14873	academisch medisch centrum	2016-12-3	n/a	major	Scaffold	full		100x			GCA_900093835.1	GCF_900093835.1	yes
NZ_FLZB01000479.1	229	100	100		scaffolds_20151360	Escherichia coli (E. coli)		562	SAMEA4350774	PRJEB14873	academisch medisch centrum	2016-12-3	n/a	major	Scaffold	full		100x			GCA_900093835.1	GCF_900093835.1	yes
NZ_FLZB01000480.1	229	100	100		scaffolds_20151360	Escherichia coli (E. coli)		562	SAMEA4350774	PRJEB14873	academisch medisch centrum	2016-12-3	n/a	major	Scaffold	full		100x			GCA_900093835.1	GCF_900093835.1	yes
NZ_FLZB01000481.1	229	99.56	100		scaffolds_20151360	Escherichia coli (E. coli)		562	SAMEA4350774	PRJEB14873	academisch medisch centrum	2016-12-3	n/a	major	Scaffold	full		100x			GCA_900093835.1	GCF_900093835.1	yes
NZ_FLZC01000251.1	243	100	100		scaffolds_20151473	Escherichia coli (E. coli)		562	SAMEA4350775	PRJEB14873	academisch medisch centrum	2016-12-3	n/a	major	Scaffold	full		100x			GCA_900093925.1	GCF_900093925.1	yes
NZ_FLZC01000256.1	239	96.37	100		scaffolds_20151473	Escherichia coli (E. coli)		562	SAMEA4350775	PRJEB14873	academisch medisch centrum	2016-12-3	n/a	major	Scaffold	full		100x			GCA_900093925.1	GCF_900093925.1	yes
NZ_FLZC01000271.1	229	100	100	WP_072936156.1	scaffolds_20151473	Escherichia coli (E. coli)		562	SAMEA4350775	PRJEB14873	academisch medisch centrum	2016-12-3	n/a	major	Scaffold	full		100x			GCA_900093925.1	GCF_900093925.1	yes
NZ_FLZD01000139.1	688	100	100	WP_077250800.1	scaffolds_C281	Escherichia coli (E. coli)		562	SAMEA4350786	PRJEB14873	academisch medisch centrum	2016-12-3	n/a	major	Scaffold	full		100x			GCA_900093895.1	GCF_900093895.1	yes
NZ_FLZD01000144.1	623	99.84	100		scaffolds_C281	Escherichia coli (E. coli)		562	SAMEA4350786	PRJEB14873	academisch medisch centrum	2016-12-3	n/a	major	Scaffold	full		100x			GCA_900093895.1	GCF_900093895.1	yes
NZ_FLZD01000146.1	593	99.66	100		scaffolds_C281	Escherichia coli (E. coli)		562	SAMEA4350786	PRJEB14873	academisch medisch centrum	2016-12-3	n/a	major	Scaffold	full		100x			GCA_900093895.1	GCF_900093895.1	yes
NZ_FLZD01000147.1	552	99.64	100	WP_072796251.1	scaffolds_C281	Escherichia coli (E. coli)		562	SAMEA4350786	PRJEB14873	academisch medisch centrum	2016-12-3	n/a	major	Scaffold	full		100x			GCA_900093895.1	GCF_900093895.1	yes
NZ_FLZD01000155.1	503	100	100		scaffolds_C281	Escherichia coli (E. coli)		562	SAMEA4350786	PRJEB14873	academisch medisch centrum	2016-12-3	n/a	major	Scaffold	full		100x			GCA_900093895.1	GCF_900093895.1	yes
NZ_FLZD01000156.1	498	100	100	WP_077250814.1	scaffolds_C281	Escherichia coli (E. coli)		562	SAMEA4350786	PRJEB14873	academisch medisch centrum	2016-12-3	n/a	major	Scaffold	full		100x			GCA_900093895.1	GCF_900093895.1	yes
NZ_FLZD01000172.1	428	100	100		scaffolds_C281	Escherichia coli (E. coli)		562	SAMEA4350786	PRJEB14873	academisch medisch centrum	2016-12-3	n/a	major	Scaffold	full		100x			GCA_900093895.1	GCF_900093895.1	yes
NZ_FLZD01000180.1	405	100	100		scaffolds_C281	Escherichia coli (E. coli)		562	SAMEA4350786	PRJEB14873	academisch medisch centrum	2016-12-3	n/a	major	Scaffold	full		100x			GCA_900093895.1	GCF_900093895.1	yes
NZ_FLZD01000181.1	401	100	100		scaffolds_C281	Escherichia coli (E. coli)		562	SAMEA4350786	PRJEB14873	academisch medisch centrum	2016-12-3	n/a	major	Scaffold	full		100x			GCA_900093895.1	GCF_900093895.1	yes
NZ_FLZD01000184.1	399	100	100		scaffolds_C281	Escherichia coli (E. coli)		562	SAMEA4350786	PRJEB14873	academisch medisch centrum	2016-12-3	n/a	major	Scaffold	full		100x			GCA_900093895.1	GCF_900093895.1	yes
NZ_FLZD01000185.1	397	100	100		scaffolds_C281	Escherichia coli (E. coli)		562	SAMEA4350786	PRJEB14873	academisch medisch centrum	2016-12-3	n/a	major	Scaffold	full		100x			GCA_900093895.1	GCF_900093895.1	yes
NZ_FLZD01000189.1	390	100	100		scaffolds_C281	Escherichia coli (E. coli)		562	SAMEA4350786	PRJEB14873	academisch medisch centrum	2016-12-3	n/a	major	Scaffold	full		100x			GCA_900093895.1	GCF_900093895.1	yes
NZ_FLZD01000190.1	386	100	100	WP_072796267.1	scaffolds_C281	Escherichia coli (E. coli)		562	SAMEA4350786	PRJEB14873	academisch medisch centrum	2016-12-3	n/a	major	Scaffold	full		100x			GCA_900093895.1	GCF_900093895.1	yes
NZ_FLZD01000192.1	381	100	100		scaffolds_C281	Escherichia coli (E. coli)		562	SAMEA4350786	PRJEB14873	academisch medisch centrum	2016-12-3	n/a	major	Scaffold	full		100x			GCA_900093895.1	GCF_900093895.1	yes
NZ_FLZD01000197.1	374	100	100		scaffolds_C281	Escherichia coli (E. coli)		562	SAMEA4350786	PRJEB14873	academisch medisch centrum	2016-12-3	n/a	major	Scaffold	full		100x			GCA_900093895.1	GCF_900093895.1	yes
NZ_FLZD01000198.1	372	99.73	100		scaffolds_C281	Escherichia coli (E. coli)		562	SAMEA4350786	PRJEB14873	academisch medisch centrum	2016-12-3	n/a	major	Scaffold	full		100x			GCA_900093895.1	GCF_900093895.1	yes
NZ_FLZD01000199.1	372	100	100		scaffolds_C281	Escherichia coli (E. coli)		562	SAMEA4350786	PRJEB14873	academisch medisch centrum	2016-12-3	n/a	major	Scaffold	full		100x			GCA_900093895.1	GCF_900093895.1	yes
NZ_FLZD01000200.1	370	100	95.41		scaffolds_C281	Escherichia coli (E. coli)		562	SAMEA4350786	PRJEB14873	academisch medisch centrum	2016-12-3	n/a	major	Scaffold	full		100x			GCA_900093895.1	GCF_900093895.1	yes
NZ_FLZD01000201.1	369	100	100		scaffolds_C281	Escherichia coli (E. coli)		562	SAMEA4350786	PRJEB14873	academisch medisch centrum	2016-12-3	n/a	major	Scaffold	full		100x			GCA_900093895.1	GCF_900093895.1	yes
NZ_FLZD01000202.1	367	100	100		scaffolds_C281	Escherichia coli (E. coli)		562	SAMEA4350786	PRJEB14873	academisch medisch centrum	2016-12-3	n/a	major	Scaffold	full		100x			GCA_900093895.1	GCF_900093895.1	yes
NZ_FLZD01000203.1	364	100	100		scaffolds_C281	Escherichia coli (E. coli)		562	SAMEA4350786	PRJEB14873	academisch medisch centrum	2016-12-3	n/a	major	Scaffold	full		100x			GCA_900093895.1	GCF_900093895.1	yes
NZ_FLZD01000204.1	364	100	100	WP_077254295.1	scaffolds_C281	Escherichia coli (E. coli)		562	SAMEA4350786	PRJEB14873	academisch medisch centrum	2016-12-3	n/a	major	Scaffold	full		100x			GCA_900093895.1	GCF_900093895.1	yes
NZ_FLZD01000206.1	362	99.45	100		scaffolds_C281	Escherichia coli (E. coli)		562	SAMEA4350786	PRJEB14873	academisch medisch centrum	2016-12-3	n/a	major	Scaffold	full		100x			GCA_900093895.1	GCF_900093895.1	yes
NZ_FLZD01000209.1	360	96.94	100		scaffolds_C281	Escherichia coli (E. coli)		562	SAMEA4350786	PRJEB14873	academisch medisch centrum	2016-12-3	n/a	major	Scaffold	full		100x			GCA_900093895.1	GCF_900093895.1	yes
NZ_FLZD01000211.1	355	100	99.15		scaffolds_C281	Escherichia coli (E. coli)		562	SAMEA4350786	PRJEB14873	academisch medisch centrum	2016-12-3	n/a	major	Scaffold	full		100x			GCA_900093895.1	GCF_900093895.1	yes
NZ_FLZD01000212.1	354	100	100		scaffolds_C281	Escherichia coli (E. coli)		562	SAMEA4350786	PRJEB14873	academisch medisch centrum	2016-12-3	n/a	major	Scaffold	full		100x			GCA_900093895.1	GCF_900093895.1	yes
NZ_FLZD01000213.1	351	100	100		scaffolds_C281	Escherichia coli (E. coli)		562	SAMEA4350786	PRJEB14873	academisch medisch centrum	2016-12-3	n/a	major	Scaffold	full		100x			GCA_900093895.1	GCF_900093895.1	yes
NZ_FLZD01000214.1	350	100	100		scaffolds_C281	Escherichia coli (E. coli)		562	SAMEA4350786	PRJEB14873	academisch medisch centrum	2016-12-3	n/a	major	Scaffold	full		100x			GCA_900093895.1	GCF_900093895.1	yes
NZ_FLZD01000215.1	347	100	100	WP_072796273.1	scaffolds_C281	Escherichia coli (E. coli)		562	SAMEA4350786	PRJEB14873	academisch medisch centrum	2016-12-3	n/a	major	Scaffold	full		100x			GCA_900093895.1	GCF_900093895.1	yes
NZ_FLZD01000217.1	345	99.71	100		scaffolds_C281	Escherichia coli (E. coli)		562	SAMEA4350786	PRJEB14873	academisch medisch centrum	2016-12-3	n/a	major	Scaffold	full		100x			GCA_900093895.1	GCF_900093895.1	yes
NZ_FLZD01000218.1	344	99.71	100		scaffolds_C281	Escherichia coli (E. coli)		562	SAMEA4350786	PRJEB14873	academisch medisch centrum	2016-12-3	n/a	major	Scaffold	full		100x			GCA_900093895.1	GCF_900093895.1	yes
NZ_FLZD01000220.1	341	99.41	100		scaffolds_C281	Escherichia coli (E. coli)		562	SAMEA4350786	PRJEB14873	academisch medisch centrum	2016-12-3	n/a	major	Scaffold	full		100x			GCA_900093895.1	GCF_900093895.1	yes
NZ_FLZD01000221.1	337	100	100		scaffolds_C281	Escherichia coli (E. coli)		562	SAMEA4350786	PRJEB14873	academisch medisch centrum	2016-12-3	n/a	major	Scaffold	full		100x			GCA_900093895.1	GCF_900093895.1	yes
NZ_FLZD01000222.1	336	99.7	100		scaffolds_C281	Escherichia coli (E. coli)		562	SAMEA4350786	PRJEB14873	academisch medisch centrum	2016-12-3	n/a	major	Scaffold	full		100x			GCA_900093895.1	GCF_900093895.1	yes
NZ_FLZD01000223.1	335	100	100		scaffolds_C281	Escherichia coli (E. coli)		562	SAMEA4350786	PRJEB14873	academisch medisch centrum	2016-12-3	n/a	major	Scaffold	full		100x			GCA_900093895.1	GCF_900093895.1	yes
NZ_FLZD01000226.1	330	100	100		scaffolds_C281	Escherichia coli (E. coli)		562	SAMEA4350786	PRJEB14873	academisch medisch centrum	2016-12-3	n/a	major	Scaffold	full		100x			GCA_900093895.1	GCF_900093895.1	yes
NZ_FLZD01000227.1	328	98.78	100		scaffolds_C281	Escherichia coli (E. coli)		562	SAMEA4350786	PRJEB14873	academisch medisch centrum	2016-12-3	n/a	major	Scaffold	full		100x			GCA_900093895.1	GCF_900093895.1	yes
NZ_FLZD01000229.1	324	100	100		scaffolds_C281	Escherichia coli (E. coli)		562	SAMEA4350786	PRJEB14873	academisch medisch centrum	2016-12-3	n/a	major	Scaffold	full		100x			GCA_900093895.1	GCF_900093895.1	yes
NZ_FLZD01000230.1	322	100	100		scaffolds_C281	Escherichia coli (E. coli)		562	SAMEA4350786	PRJEB14873	academisch medisch centrum	2016-12-3	n/a	major	Scaffold	full		100x			GCA_900093895.1	GCF_900093895.1	yes
NZ_FLZD01000231.1	321	99.38	100		scaffolds_C281	Escherichia coli (E. coli)		562	SAMEA4350786	PRJEB14873	academisch medisch centrum	2016-12-3	n/a	major	Scaffold	full		100x			GCA_900093895.1	GCF_900093895.1	yes
NZ_FLZD01000232.1	320	100	100		scaffolds_C281	Escherichia coli (E. coli)		562	SAMEA4350786	PRJEB14873	academisch medisch centrum	2016-12-3	n/a	major	Scaffold	full		100x			GCA_900093895.1	GCF_900093895.1	yes
NZ_FLZD01000235.1	317	100	100		scaffolds_C281	Escherichia coli (E. coli)		562	SAMEA4350786	PRJEB14873	academisch medisch centrum	2016-12-3	n/a	major	Scaffold	full		100x			GCA_900093895.1	GCF_900093895.1	yes
NZ_FLZD01000237.1	316	100	100	WP_072796282.1	scaffolds_C281	Escherichia coli (E. coli)		562	SAMEA4350786	PRJEB14873	academisch medisch centrum	2016-12-3	n/a	major	Scaffold	full		100x			GCA_900093895.1	GCF_900093895.1	yes
NZ_FLZD01000238.1	313	100	100		scaffolds_C281	Escherichia coli (E. coli)		562	SAMEA4350786	PRJEB14873	academisch medisch centrum	2016-12-3	n/a	major	Scaffold	full		100x			GCA_900093895.1	GCF_900093895.1	yes
NZ_FLZD01000239.1	313	99.68	100		scaffolds_C281	Escherichia coli (E. coli)		562	SAMEA4350786	PRJEB14873	academisch medisch centrum	2016-12-3	n/a	major	Scaffold	full		100x			GCA_900093895.1	GCF_900093895.1	yes
NZ_FLZD01000240.1	312	100	100		scaffolds_C281	Escherichia coli (E. coli)		562	SAMEA4350786	PRJEB14873	academisch medisch centrum	2016-12-3	n/a	major	Scaffold	full		100x			GCA_900093895.1	GCF_900093895.1	yes
NZ_FLZD01000241.1	311	99.68	100		scaffolds_C281	Escherichia coli (E. coli)		562	SAMEA4350786	PRJEB14873	academisch medisch centrum	2016-12-3	n/a	major	Scaffold	full		100x			GCA_900093895.1	GCF_900093895.1	yes
NZ_FLZD01000243.1	309	100	100		scaffolds_C281	Escherichia coli (E. coli)		562	SAMEA4350786	PRJEB14873	academisch medisch centrum	2016-12-3	n/a	major	Scaffold	full		100x			GCA_900093895.1	GCF_900093895.1	yes
NZ_FLZD01000244.1	308	100	100	WP_077254296.1	scaffolds_C281	Escherichia coli (E. coli)		562	SAMEA4350786	PRJEB14873	academisch medisch centrum	2016-12-3	n/a	major	Scaffold	full		100x			GCA_900093895.1	GCF_900093895.1	yes
NZ_FLZD01000245.1	308	100	100		scaffolds_C281	Escherichia coli (E. coli)		562	SAMEA4350786	PRJEB14873	academisch medisch centrum	2016-12-3	n/a	major	Scaffold	full		100x			GCA_900093895.1	GCF_900093895.1	yes
NZ_FLZD01000246.1	308	100	100	WP_077254297.1	scaffolds_C281	Escherichia coli (E. coli)		562	SAMEA4350786	PRJEB14873	academisch medisch centrum	2016-12-3	n/a	major	Scaffold	full		100x			GCA_900093895.1	GCF_900093895.1	yes
NZ_FLZD01000248.1	307	100	100		scaffolds_C281	Escherichia coli (E. coli)		562	SAMEA4350786	PRJEB14873	academisch medisch centrum	2016-12-3	n/a	major	Scaffold	full		100x			GCA_900093895.1	GCF_900093895.1	yes
NZ_FLZD01000250.1	306	100	100		scaffolds_C281	Escherichia coli (E. coli)		562	SAMEA4350786	PRJEB14873	academisch medisch centrum	2016-12-3	n/a	major	Scaffold	full		100x			GCA_900093895.1	GCF_900093895.1	yes
NZ_FLZD01000251.1	304	100	100		scaffolds_C281	Escherichia coli (E. coli)		562	SAMEA4350786	PRJEB14873	academisch medisch centrum	2016-12-3	n/a	major	Scaffold	full		100x			GCA_900093895.1	GCF_900093895.1	yes
NZ_FLZD01000252.1	304	100	100		scaffolds_C281	Escherichia coli (E. coli)		562	SAMEA4350786	PRJEB14873	academisch medisch centrum	2016-12-3	n/a	major	Scaffold	full		100x			GCA_900093895.1	GCF_900093895.1	yes
NZ_FLZD01000253.1	303	99.67	100		scaffolds_C281	Escherichia coli (E. coli)		562	SAMEA4350786	PRJEB14873	academisch medisch centrum	2016-12-3	n/a	major	Scaffold	full		100x			GCA_900093895.1	GCF_900093895.1	yes
NZ_FLZD01000255.1	300	100	100		scaffolds_C281	Escherichia coli (E. coli)		562	SAMEA4350786	PRJEB14873	academisch medisch centrum	2016-12-3	n/a	major	Scaffold	full		100x			GCA_900093895.1	GCF_900093895.1	yes
NZ_FLZD01000256.1	300	100	100		scaffolds_C281	Escherichia coli (E. coli)		562	SAMEA4350786	PRJEB14873	academisch medisch centrum	2016-12-3	n/a	major	Scaffold	full		100x			GCA_900093895.1	GCF_900093895.1	yes
NZ_FLZD01000257.1	299	98.68	100		scaffolds_C281	Escherichia coli (E. coli)		562	SAMEA4350786	PRJEB14873	academisch medisch centrum	2016-12-3	n/a	major	Scaffold	full		100x			GCA_900093895.1	GCF_900093895.1	yes
NZ_FLZD01000258.1	297	100	100		scaffolds_C281	Escherichia coli (E. coli)		562	SAMEA4350786	PRJEB14873	academisch medisch centrum	2016-12-3	n/a	major	Scaffold	full		100x			GCA_900093895.1	GCF_900093895.1	yes
NZ_FLZD01000259.1	296	100	100		scaffolds_C281	Escherichia coli (E. coli)		562	SAMEA4350786	PRJEB14873	academisch medisch centrum	2016-12-3	n/a	major	Scaffold	full		100x			GCA_900093895.1	GCF_900093895.1	yes
NZ_FLZD01000260.1	292	98.97	100		scaffolds_C281	Escherichia coli (E. coli)		562	SAMEA4350786	PRJEB14873	academisch medisch centrum	2016-12-3	n/a	major	Scaffold	full		100x			GCA_900093895.1	GCF_900093895.1	yes
NZ_FLZD01000261.1	289	99.31	100		scaffolds_C281	Escherichia coli (E. coli)		562	SAMEA4350786	PRJEB14873	academisch medisch centrum	2016-12-3	n/a	major	Scaffold	full		100x			GCA_900093895.1	GCF_900093895.1	yes
NZ_FLZD01000262.1	288	100	100		scaffolds_C281	Escherichia coli (E. coli)		562	SAMEA4350786	PRJEB14873	academisch medisch centrum	2016-12-3	n/a	major	Scaffold	full		100x			GCA_900093895.1	GCF_900093895.1	yes
NZ_FLZD01000263.1	287	100	100		scaffolds_C281	Escherichia coli (E. coli)		562	SAMEA4350786	PRJEB14873	academisch medisch centrum	2016-12-3	n/a	major	Scaffold	full		100x			GCA_900093895.1	GCF_900093895.1	yes
NZ_FLZD01000264.1	283	100	100		scaffolds_C281	Escherichia coli (E. coli)		562	SAMEA4350786	PRJEB14873	academisch medisch centrum	2016-12-3	n/a	major	Scaffold	full		100x			GCA_900093895.1	GCF_900093895.1	yes
NZ_FLZD01000265.1	282	99.65	100		scaffolds_C281	Escherichia coli (E. coli)		562	SAMEA4350786	PRJEB14873	academisch medisch centrum	2016-12-3	n/a	major	Scaffold	full		100x			GCA_900093895.1	GCF_900093895.1	yes
NZ_FLZD01000266.1	282	100	100		scaffolds_C281	Escherichia coli (E. coli)		562	SAMEA4350786	PRJEB14873	academisch medisch centrum	2016-12-3	n/a	major	Scaffold	full		100x			GCA_900093895.1	GCF_900093895.1	yes
NZ_FLZD01000267.1	282	99.65	100		scaffolds_C281	Escherichia coli (E. coli)		562	SAMEA4350786	PRJEB14873	academisch medisch centrum	2016-12-3	n/a	major	Scaffold	full		100x			GCA_900093895.1	GCF_900093895.1	yes
NZ_FLZD01000268.1	282	100	100		scaffolds_C281	Escherichia coli (E. coli)		562	SAMEA4350786	PRJEB14873	academisch medisch centrum	2016-12-3	n/a	major	Scaffold	full		100x			GCA_900093895.1	GCF_900093895.1	yes
NZ_FLZD01000269.1	281	100	100		scaffolds_C281	Escherichia coli (E. coli)		562	SAMEA4350786	PRJEB14873	academisch medisch centrum	2016-12-3	n/a	major	Scaffold	full		100x			GCA_900093895.1	GCF_900093895.1	yes
NZ_FLZD01000271.1	279	99.64	100		scaffolds_C281	Escherichia coli (E. coli)		562	SAMEA4350786	PRJEB14873	academisch medisch centrum	2016-12-3	n/a	major	Scaffold	full		100x			GCA_900093895.1	GCF_900093895.1	yes
NZ_FLZD01000272.1	278	100	100		scaffolds_C281	Escherichia coli (E. coli)		562	SAMEA4350786	PRJEB14873	academisch medisch centrum	2016-12-3	n/a	major	Scaffold	full		100x			GCA_900093895.1	GCF_900093895.1	yes
NZ_FLZD01000273.1	276	100	100		scaffolds_C281	Escherichia coli (E. coli)		562	SAMEA4350786	PRJEB14873	academisch medisch centrum	2016-12-3	n/a	major	Scaffold	full		100x			GCA_900093895.1	GCF_900093895.1	yes
NZ_FLZD01000274.1	276	100	100		scaffolds_C281	Escherichia coli (E. coli)		562	SAMEA4350786	PRJEB14873	academisch medisch centrum	2016-12-3	n/a	major	Scaffold	full		100x			GCA_900093895.1	GCF_900093895.1	yes
NZ_FLZD01000276.1	275	98.18	100		scaffolds_C281	Escherichia coli (E. coli)		562	SAMEA4350786	PRJEB14873	academisch medisch centrum	2016-12-3	n/a	major	Scaffold	full		100x			GCA_900093895.1	GCF_900093895.1	yes
NZ_FLZD01000277.1	273	100	100		scaffolds_C281	Escherichia coli (E. coli)		562	SAMEA4350786	PRJEB14873	academisch medisch centrum	2016-12-3	n/a	major	Scaffold	full		100x			GCA_900093895.1	GCF_900093895.1	yes
NZ_FLZD01000278.1	272	100	100		scaffolds_C281	Escherichia coli (E. coli)		562	SAMEA4350786	PRJEB14873	academisch medisch centrum	2016-12-3	n/a	major	Scaffold	full		100x			GCA_900093895.1	GCF_900093895.1	yes
NZ_FLZD01000279.1	272	100	100		scaffolds_C281	Escherichia coli (E. coli)		562	SAMEA4350786	PRJEB14873	academisch medisch centrum	2016-12-3	n/a	major	Scaffold	full		100x			GCA_900093895.1	GCF_900093895.1	yes
NZ_FLZD01000280.1	270	100	100		scaffolds_C281	Escherichia coli (E. coli)		562	SAMEA4350786	PRJEB14873	academisch medisch centrum	2016-12-3	n/a	major	Scaffold	full		100x			GCA_900093895.1	GCF_900093895.1	yes
NZ_FLZD01000281.1	270	100	100		scaffolds_C281	Escherichia coli (E. coli)		562	SAMEA4350786	PRJEB14873	academisch medisch centrum	2016-12-3	n/a	major	Scaffold	full		100x			GCA_900093895.1	GCF_900093895.1	yes
NZ_FLZD01000282.1	269	100	100		scaffolds_C281	Escherichia coli (E. coli)		562	SAMEA4350786	PRJEB14873	academisch medisch centrum	2016-12-3	n/a	major	Scaffold	full		100x			GCA_900093895.1	GCF_900093895.1	yes
NZ_FLZD01000283.1	268	100	100		scaffolds_C281	Escherichia coli (E. coli)		562	SAMEA4350786	PRJEB14873	academisch medisch centrum	2016-12-3	n/a	major	Scaffold	full		100x			GCA_900093895.1	GCF_900093895.1	yes
NZ_FLZD01000286.1	266	100	100		scaffolds_C281	Escherichia coli (E. coli)		562	SAMEA4350786	PRJEB14873	academisch medisch centrum	2016-12-3	n/a	major	Scaffold	full		100x			GCA_900093895.1	GCF_900093895.1	yes
NZ_FLZD01000287.1	264	100	100		scaffolds_C281	Escherichia coli (E. coli)		562	SAMEA4350786	PRJEB14873	academisch medisch centrum	2016-12-3	n/a	major	Scaffold	full		100x			GCA_900093895.1	GCF_900093895.1	yes
NZ_FLZD01000290.1	261	99.62	100		scaffolds_C281	Escherichia coli (E. coli)		562	SAMEA4350786	PRJEB14873	academisch medisch centrum	2016-12-3	n/a	major	Scaffold	full		100x			GCA_900093895.1	GCF_900093895.1	yes
NZ_FLZD01000291.1	260	100	100	WP_072796285.1	scaffolds_C281	Escherichia coli (E. coli)		562	SAMEA4350786	PRJEB14873	academisch medisch centrum	2016-12-3	n/a	major	Scaffold	full		100x			GCA_900093895.1	GCF_900093895.1	yes
NZ_FLZD01000294.1	259	100	100		scaffolds_C281	Escherichia coli (E. coli)		562	SAMEA4350786	PRJEB14873	academisch medisch centrum	2016-12-3	n/a	major	Scaffold	full		100x			GCA_900093895.1	GCF_900093895.1	yes
NZ_FLZD01000295.1	259	100	100		scaffolds_C281	Escherichia coli (E. coli)		562	SAMEA4350786	PRJEB14873	academisch medisch centrum	2016-12-3	n/a	major	Scaffold	full		100x			GCA_900093895.1	GCF_900093895.1	yes
NZ_FLZD01000296.1	258	100	100		scaffolds_C281	Escherichia coli (E. coli)		562	SAMEA4350786	PRJEB14873	academisch medisch centrum	2016-12-3	n/a	major	Scaffold	full		100x			GCA_900093895.1	GCF_900093895.1	yes
NZ_FLZD01000297.1	257	100	100		scaffolds_C281	Escherichia coli (E. coli)		562	SAMEA4350786	PRJEB14873	academisch medisch centrum	2016-12-3	n/a	major	Scaffold	full		100x			GCA_900093895.1	GCF_900093895.1	yes
NZ_FLZD01000298.1	257	99.61	100		scaffolds_C281	Escherichia coli (E. coli)		562	SAMEA4350786	PRJEB14873	academisch medisch centrum	2016-12-3	n/a	major	Scaffold	full		100x			GCA_900093895.1	GCF_900093895.1	yes
NZ_FLZD01000299.1	257	99.61	100		scaffolds_C281	Escherichia coli (E. coli)		562	SAMEA4350786	PRJEB14873	academisch medisch centrum	2016-12-3	n/a	major	Scaffold	full		100x			GCA_900093895.1	GCF_900093895.1	yes
NZ_FLZD01000300.1	257	100	100		scaffolds_C281	Escherichia coli (E. coli)		562	SAMEA4350786	PRJEB14873	academisch medisch centrum	2016-12-3	n/a	major	Scaffold	full		100x			GCA_900093895.1	GCF_900093895.1	yes
NZ_FLZD01000302.1	255	98.82	100		scaffolds_C281	Escherichia coli (E. coli)		562	SAMEA4350786	PRJEB14873	academisch medisch centrum	2016-12-3	n/a	major	Scaffold	full		100x			GCA_900093895.1	GCF_900093895.1	yes
NZ_FLZD01000304.1	252	100	100		scaffolds_C281	Escherichia coli (E. coli)		562	SAMEA4350786	PRJEB14873	academisch medisch centrum	2016-12-3	n/a	major	Scaffold	full		100x			GCA_900093895.1	GCF_900093895.1	yes
NZ_FLZD01000305.1	252	100	100		scaffolds_C281	Escherichia coli (E. coli)		562	SAMEA4350786	PRJEB14873	academisch medisch centrum	2016-12-3	n/a	major	Scaffold	full		100x			GCA_900093895.1	GCF_900093895.1	yes
NZ_FLZD01000306.1	252	99.6	100		scaffolds_C281	Escherichia coli (E. coli)		562	SAMEA4350786	PRJEB14873	academisch medisch centrum	2016-12-3	n/a	major	Scaffold	full		100x			GCA_900093895.1	GCF_900093895.1	yes
NZ_FLZD01000307.1	252	100	100		scaffolds_C281	Escherichia coli (E. coli)		562	SAMEA4350786	PRJEB14873	academisch medisch centrum	2016-12-3	n/a	major	Scaffold	full		100x			GCA_900093895.1	GCF_900093895.1	yes
NZ_FLZD01000309.1	249	100	100		scaffolds_C281	Escherichia coli (E. coli)		562	SAMEA4350786	PRJEB14873	academisch medisch centrum	2016-12-3	n/a	major	Scaffold	full		100x			GCA_900093895.1	GCF_900093895.1	yes
NZ_FLZD01000310.1	247	100	100		scaffolds_C281	Escherichia coli (E. coli)		562	SAMEA4350786	PRJEB14873	academisch medisch centrum	2016-12-3	n/a	major	Scaffold	full		100x			GCA_900093895.1	GCF_900093895.1	yes
NZ_FLZD01000311.1	246	99.59	100		scaffolds_C281	Escherichia coli (E. coli)		562	SAMEA4350786	PRJEB14873	academisch medisch centrum	2016-12-3	n/a	major	Scaffold	full		100x			GCA_900093895.1	GCF_900093895.1	yes
NZ_FLZD01000312.1	246	99.59	100		scaffolds_C281	Escherichia coli (E. coli)		562	SAMEA4350786	PRJEB14873	academisch medisch centrum	2016-12-3	n/a	major	Scaffold	full		100x			GCA_900093895.1	GCF_900093895.1	yes
NZ_FLZD01000313.1	246	100	100		scaffolds_C281	Escherichia coli (E. coli)		562	SAMEA4350786	PRJEB14873	academisch medisch centrum	2016-12-3	n/a	major	Scaffold	full		100x			GCA_900093895.1	GCF_900093895.1	yes
NZ_FLZD01000314.1	244	100	100		scaffolds_C281	Escherichia coli (E. coli)		562	SAMEA4350786	PRJEB14873	academisch medisch centrum	2016-12-3	n/a	major	Scaffold	full		100x			GCA_900093895.1	GCF_900093895.1	yes
NZ_FLZD01000316.1	243	100	100		scaffolds_C281	Escherichia coli (E. coli)		562	SAMEA4350786	PRJEB14873	academisch medisch centrum	2016-12-3	n/a	major	Scaffold	full		100x			GCA_900093895.1	GCF_900093895.1	yes
NZ_FLZD01000317.1	243	99.59	100		scaffolds_C281	Escherichia coli (E. coli)		562	SAMEA4350786	PRJEB14873	academisch medisch centrum	2016-12-3	n/a	major	Scaffold	full		100x			GCA_900093895.1	GCF_900093895.1	yes
NZ_FLZD01000318.1	242	100	100		scaffolds_C281	Escherichia coli (E. coli)		562	SAMEA4350786	PRJEB14873	academisch medisch centrum	2016-12-3	n/a	major	Scaffold	full		100x			GCA_900093895.1	GCF_900093895.1	yes
NZ_FLZD01000319.1	241	100	100		scaffolds_C281	Escherichia coli (E. coli)		562	SAMEA4350786	PRJEB14873	academisch medisch centrum	2016-12-3	n/a	major	Scaffold	full		100x			GCA_900093895.1	GCF_900093895.1	yes
NZ_FLZD01000320.1	241	100	100		scaffolds_C281	Escherichia coli (E. coli)		562	SAMEA4350786	PRJEB14873	academisch medisch centrum	2016-12-3	n/a	major	Scaffold	full		100x			GCA_900093895.1	GCF_900093895.1	yes
NZ_FLZD01000321.1	240	100	100		scaffolds_C281	Escherichia coli (E. coli)		562	SAMEA4350786	PRJEB14873	academisch medisch centrum	2016-12-3	n/a	major	Scaffold	full		100x			GCA_900093895.1	GCF_900093895.1	yes
NZ_FLZD01000322.1	240	100	100		scaffolds_C281	Escherichia coli (E. coli)		562	SAMEA4350786	PRJEB14873	academisch medisch centrum	2016-12-3	n/a	major	Scaffold	full		100x			GCA_900093895.1	GCF_900093895.1	yes
NZ_FLZD01000323.1	240	100	100		scaffolds_C281	Escherichia coli (E. coli)		562	SAMEA4350786	PRJEB14873	academisch medisch centrum	2016-12-3	n/a	major	Scaffold	full		100x			GCA_900093895.1	GCF_900093895.1	yes
NZ_FLZD01000324.1	239	100	100		scaffolds_C281	Escherichia coli (E. coli)		562	SAMEA4350786	PRJEB14873	academisch medisch centrum	2016-12-3	n/a	major	Scaffold	full		100x			GCA_900093895.1	GCF_900093895.1	yes
NZ_FLZD01000326.1	238	100	100		scaffolds_C281	Escherichia coli (E. coli)		562	SAMEA4350786	PRJEB14873	academisch medisch centrum	2016-12-3	n/a	major	Scaffold	full		100x			GCA_900093895.1	GCF_900093895.1	yes
NZ_FLZD01000327.1	238	100	100		scaffolds_C281	Escherichia coli (E. coli)		562	SAMEA4350786	PRJEB14873	academisch medisch centrum	2016-12-3	n/a	major	Scaffold	full		100x			GCA_900093895.1	GCF_900093895.1	yes
NZ_FLZD01000328.1	238	100	100		scaffolds_C281	Escherichia coli (E. coli)		562	SAMEA4350786	PRJEB14873	academisch medisch centrum	2016-12-3	n/a	major	Scaffold	full		100x			GCA_900093895.1	GCF_900093895.1	yes
NZ_FLZD01000329.1	237	100	100		scaffolds_C281	Escherichia coli (E. coli)		562	SAMEA4350786	PRJEB14873	academisch medisch centrum	2016-12-3	n/a	major	Scaffold	full		100x			GCA_900093895.1	GCF_900093895.1	yes
NZ_FLZD01000330.1	237	100	100		scaffolds_C281	Escherichia coli (E. coli)		562	SAMEA4350786	PRJEB14873	academisch medisch centrum	2016-12-3	n/a	major	Scaffold	full		100x			GCA_900093895.1	GCF_900093895.1	yes
NZ_FLZD01000331.1	236	100	100	WP_072794699.1	scaffolds_C281	Escherichia coli (E. coli)		562	SAMEA4350786	PRJEB14873	academisch medisch centrum	2016-12-3	n/a	major	Scaffold	full		100x			GCA_900093895.1	GCF_900093895.1	yes
NZ_FLZD01000332.1	236	100	100		scaffolds_C281	Escherichia coli (E. coli)		562	SAMEA4350786	PRJEB14873	academisch medisch centrum	2016-12-3	n/a	major	Scaffold	full		100x			GCA_900093895.1	GCF_900093895.1	yes
NZ_FLZD01000334.1	236	100	100		scaffolds_C281	Escherichia coli (E. coli)		562	SAMEA4350786	PRJEB14873	academisch medisch centrum	2016-12-3	n/a	major	Scaffold	full		100x			GCA_900093895.1	GCF_900093895.1	yes
NZ_FLZD01000335.1	236	100	100		scaffolds_C281	Escherichia coli (E. coli)		562	SAMEA4350786	PRJEB14873	academisch medisch centrum	2016-12-3	n/a	major	Scaffold	full		100x			GCA_900093895.1	GCF_900093895.1	yes
NZ_FLZD01000336.1	235	100	100		scaffolds_C281	Escherichia coli (E. coli)		562	SAMEA4350786	PRJEB14873	academisch medisch centrum	2016-12-3	n/a	major	Scaffold	full		100x			GCA_900093895.1	GCF_900093895.1	yes
NZ_FLZD01000337.1	235	100	100		scaffolds_C281	Escherichia coli (E. coli)		562	SAMEA4350786	PRJEB14873	academisch medisch centrum	2016-12-3	n/a	major	Scaffold	full		100x			GCA_900093895.1	GCF_900093895.1	yes
NZ_FLZD01000338.1	235	99.57	100		scaffolds_C281	Escherichia coli (E. coli)		562	SAMEA4350786	PRJEB14873	academisch medisch centrum	2016-12-3	n/a	major	Scaffold	full		100x			GCA_900093895.1	GCF_900093895.1	yes
NZ_FLZD01000339.1	235	100	100		scaffolds_C281	Escherichia coli (E. coli)		562	SAMEA4350786	PRJEB14873	academisch medisch centrum	2016-12-3	n/a	major	Scaffold	full		100x			GCA_900093895.1	GCF_900093895.1	yes
NZ_FLZD01000341.1	235	99.15	100		scaffolds_C281	Escherichia coli (E. coli)		562	SAMEA4350786	PRJEB14873	academisch medisch centrum	2016-12-3	n/a	major	Scaffold	full		100x			GCA_900093895.1	GCF_900093895.1	yes
NZ_FLZD01000342.1	235	100	100		scaffolds_C281	Escherichia coli (E. coli)		562	SAMEA4350786	PRJEB14873	academisch medisch centrum	2016-12-3	n/a	major	Scaffold	full		100x			GCA_900093895.1	GCF_900093895.1	yes
NZ_FLZD01000343.1	234	100	100		scaffolds_C281	Escherichia coli (E. coli)		562	SAMEA4350786	PRJEB14873	academisch medisch centrum	2016-12-3	n/a	major	Scaffold	full		100x			GCA_900093895.1	GCF_900093895.1	yes
NZ_FLZD01000345.1	233	100	100		scaffolds_C281	Escherichia coli (E. coli)		562	SAMEA4350786	PRJEB14873	academisch medisch centrum	2016-12-3	n/a	major	Scaffold	full		100x			GCA_900093895.1	GCF_900093895.1	yes
NZ_FLZD01000346.1	232	99.14	100		scaffolds_C281	Escherichia coli (E. coli)		562	SAMEA4350786	PRJEB14873	academisch medisch centrum	2016-12-3	n/a	major	Scaffold	full		100x			GCA_900093895.1	GCF_900093895.1	yes
NZ_FLZD01000348.1	232	99.57	100		scaffolds_C281	Escherichia coli (E. coli)		562	SAMEA4350786	PRJEB14873	academisch medisch centrum	2016-12-3	n/a	major	Scaffold	full		100x			GCA_900093895.1	GCF_900093895.1	yes
NZ_FLZD01000349.1	231	100	100		scaffolds_C281	Escherichia coli (E. coli)		562	SAMEA4350786	PRJEB14873	academisch medisch centrum	2016-12-3	n/a	major	Scaffold	full		100x			GCA_900093895.1	GCF_900093895.1	yes
NZ_FLZD01000350.1	231	100	100		scaffolds_C281	Escherichia coli (E. coli)		562	SAMEA4350786	PRJEB14873	academisch medisch centrum	2016-12-3	n/a	major	Scaffold	full		100x			GCA_900093895.1	GCF_900093895.1	yes
NZ_FLZD01000351.1	231	100	100		scaffolds_C281	Escherichia coli (E. coli)		562	SAMEA4350786	PRJEB14873	academisch medisch centrum	2016-12-3	n/a	major	Scaffold	full		100x			GCA_900093895.1	GCF_900093895.1	yes
NZ_FLZD01000352.1	231	99.57	100		scaffolds_C281	Escherichia coli (E. coli)		562	SAMEA4350786	PRJEB14873	academisch medisch centrum	2016-12-3	n/a	major	Scaffold	full		100x			GCA_900093895.1	GCF_900093895.1	yes
NZ_FLZD01000353.1	231	100	100		scaffolds_C281	Escherichia coli (E. coli)		562	SAMEA4350786	PRJEB14873	academisch medisch centrum	2016-12-3	n/a	major	Scaffold	full		100x			GCA_900093895.1	GCF_900093895.1	yes
NZ_FLZD01000354.1	230	100	100		scaffolds_C281	Escherichia coli (E. coli)		562	SAMEA4350786	PRJEB14873	academisch medisch centrum	2016-12-3	n/a	major	Scaffold	full		100x			GCA_900093895.1	GCF_900093895.1	yes
NZ_FLZD01000355.1	230	100	100		scaffolds_C281	Escherichia coli (E. coli)		562	SAMEA4350786	PRJEB14873	academisch medisch centrum	2016-12-3	n/a	major	Scaffold	full		100x			GCA_900093895.1	GCF_900093895.1	yes
NZ_FLZD01000356.1	230	100	100		scaffolds_C281	Escherichia coli (E. coli)		562	SAMEA4350786	PRJEB14873	academisch medisch centrum	2016-12-3	n/a	major	Scaffold	full		100x			GCA_900093895.1	GCF_900093895.1	yes
NZ_FLZD01000357.1	230	100	100		scaffolds_C281	Escherichia coli (E. coli)		562	SAMEA4350786	PRJEB14873	academisch medisch centrum	2016-12-3	n/a	major	Scaffold	full		100x			GCA_900093895.1	GCF_900093895.1	yes
NZ_FLZD01000358.1	230	99.57	100		scaffolds_C281	Escherichia coli (E. coli)		562	SAMEA4350786	PRJEB14873	academisch medisch centrum	2016-12-3	n/a	major	Scaffold	full		100x			GCA_900093895.1	GCF_900093895.1	yes
NZ_FLZD01000359.1	229	100	100		scaffolds_C281	Escherichia coli (E. coli)		562	SAMEA4350786	PRJEB14873	academisch medisch centrum	2016-12-3	n/a	major	Scaffold	full		100x			GCA_900093895.1	GCF_900093895.1	yes
NZ_FLZD01000360.1	229	100	100	WP_072794665.1	scaffolds_C281	Escherichia coli (E. coli)		562	SAMEA4350786	PRJEB14873	academisch medisch centrum	2016-12-3	n/a	major	Scaffold	full		100x			GCA_900093895.1	GCF_900093895.1	yes
NZ_FLZD01000361.1	229	99.56	100		scaffolds_C281	Escherichia coli (E. coli)		562	SAMEA4350786	PRJEB14873	academisch medisch centrum	2016-12-3	n/a	major	Scaffold	full		100x			GCA_900093895.1	GCF_900093895.1	yes
NZ_FLZE01000107.1	554	99.82	100		scaffolds_20160007	Escherichia coli (E. coli)		562	SAMEA4350777	PRJEB14873	academisch medisch centrum	2016-12-3	n/a	major	Scaffold	full		100x			GCA_900093855.1	GCF_900093855.1	yes
NZ_FLZE01000110.1	528	99.43	100		scaffolds_20160007	Escherichia coli (E. coli)		562	SAMEA4350777	PRJEB14873	academisch medisch centrum	2016-12-3	n/a	major	Scaffold	full		100x			GCA_900093855.1	GCF_900093855.1	yes
NZ_FLZE01000120.1	455	100	100		scaffolds_20160007	Escherichia coli (E. coli)		562	SAMEA4350777	PRJEB14873	academisch medisch centrum	2016-12-3	n/a	major	Scaffold	full		100x			GCA_900093855.1	GCF_900093855.1	yes
NZ_FLZE01000123.1	445	99.78	100		scaffolds_20160007	Escherichia coli (E. coli)		562	SAMEA4350777	PRJEB14873	academisch medisch centrum	2016-12-3	n/a	major	Scaffold	full		100x			GCA_900093855.1	GCF_900093855.1	yes
NZ_FLZE01000124.1	441	99.77	100		scaffolds_20160007	Escherichia coli (E. coli)		562	SAMEA4350777	PRJEB14873	academisch medisch centrum	2016-12-3	n/a	major	Scaffold	full		100x			GCA_900093855.1	GCF_900093855.1	yes
NZ_FLZE01000125.1	437	100	100		scaffolds_20160007	Escherichia coli (E. coli)		562	SAMEA4350777	PRJEB14873	academisch medisch centrum	2016-12-3	n/a	major	Scaffold	full		100x			GCA_900093855.1	GCF_900093855.1	yes
NZ_FLZE01000126.1	436	100	100	WP_077250948.1	scaffolds_20160007	Escherichia coli (E. coli)		562	SAMEA4350777	PRJEB14873	academisch medisch centrum	2016-12-3	n/a	major	Scaffold	full		100x			GCA_900093855.1	GCF_900093855.1	yes
NZ_FLZE01000135.1	390	100	100		scaffolds_20160007	Escherichia coli (E. coli)		562	SAMEA4350777	PRJEB14873	academisch medisch centrum	2016-12-3	n/a	major	Scaffold	full		100x			GCA_900093855.1	GCF_900093855.1	yes
NZ_FLZE01000136.1	387	99.74	100		scaffolds_20160007	Escherichia coli (E. coli)		562	SAMEA4350777	PRJEB14873	academisch medisch centrum	2016-12-3	n/a	major	Scaffold	full		100x			GCA_900093855.1	GCF_900093855.1	yes
NZ_FLZE01000138.1	378	100	100	WP_072775667.1	scaffolds_20160007	Escherichia coli (E. coli)		562	SAMEA4350777	PRJEB14873	academisch medisch centrum	2016-12-3	n/a	major	Scaffold	full		100x			GCA_900093855.1	GCF_900093855.1	yes
NZ_FLZE01000140.1	369	99.73	100		scaffolds_20160007	Escherichia coli (E. coli)		562	SAMEA4350777	PRJEB14873	academisch medisch centrum	2016-12-3	n/a	major	Scaffold	full		100x			GCA_900093855.1	GCF_900093855.1	yes
NZ_FLZE01000141.1	365	100	100	WP_072775669.1	scaffolds_20160007	Escherichia coli (E. coli)		562	SAMEA4350777	PRJEB14873	academisch medisch centrum	2016-12-3	n/a	major	Scaffold	full		100x			GCA_900093855.1	GCF_900093855.1	yes
NZ_FLZE01000142.1	364	99.73	100		scaffolds_20160007	Escherichia coli (E. coli)		562	SAMEA4350777	PRJEB14873	academisch medisch centrum	2016-12-3	n/a	major	Scaffold	full		100x			GCA_900093855.1	GCF_900093855.1	yes
NZ_FLZE01000144.1	363	99.72	100		scaffolds_20160007	Escherichia coli (E. coli)		562	SAMEA4350777	PRJEB14873	academisch medisch centrum	2016-12-3	n/a	major	Scaffold	full		100x			GCA_900093855.1	GCF_900093855.1	yes
NZ_FLZE01000145.1	357	100	100	WP_072775670.1	scaffolds_20160007	Escherichia coli (E. coli)		562	SAMEA4350777	PRJEB14873	academisch medisch centrum	2016-12-3	n/a	major	Scaffold	full		100x			GCA_900093855.1	GCF_900093855.1	yes
NZ_FLZE01000151.1	351	100	100		scaffolds_20160007	Escherichia coli (E. coli)		562	SAMEA4350777	PRJEB14873	academisch medisch centrum	2016-12-3	n/a	major	Scaffold	full		100x			GCA_900093855.1	GCF_900093855.1	yes
NZ_FLZE01000152.1	349	99.71	100		scaffolds_20160007	Escherichia coli (E. coli)		562	SAMEA4350777	PRJEB14873	academisch medisch centrum	2016-12-3	n/a	major	Scaffold	full		100x			GCA_900093855.1	GCF_900093855.1	yes
NZ_FLZE01000153.1	349	100	100		scaffolds_20160007	Escherichia coli (E. coli)		562	SAMEA4350777	PRJEB14873	academisch medisch centrum	2016-12-3	n/a	major	Scaffold	full		100x			GCA_900093855.1	GCF_900093855.1	yes
NZ_FLZE01000154.1	348	100	100		scaffolds_20160007	Escherichia coli (E. coli)		562	SAMEA4350777	PRJEB14873	academisch medisch centrum	2016-12-3	n/a	major	Scaffold	full		100x			GCA_900093855.1	GCF_900093855.1	yes
NZ_FLZE01000155.1	347	100	100	WP_077250949.1	scaffolds_20160007	Escherichia coli (E. coli)		562	SAMEA4350777	PRJEB14873	academisch medisch centrum	2016-12-3	n/a	major	Scaffold	full		100x			GCA_900093855.1	GCF_900093855.1	yes
NZ_FLZE01000157.1	346	100	100		scaffolds_20160007	Escherichia coli (E. coli)		562	SAMEA4350777	PRJEB14873	academisch medisch centrum	2016-12-3	n/a	major	Scaffold	full		100x			GCA_900093855.1	GCF_900093855.1	yes
NZ_FLZE01000158.1	345	99.71	100		scaffolds_20160007	Escherichia coli (E. coli)		562	SAMEA4350777	PRJEB14873	academisch medisch centrum	2016-12-3	n/a	major	Scaffold	full		100x			GCA_900093855.1	GCF_900093855.1	yes
NZ_FLZE01000159.1	345	99.71	100		scaffolds_20160007	Escherichia coli (E. coli)		562	SAMEA4350777	PRJEB14873	academisch medisch centrum	2016-12-3	n/a	major	Scaffold	full		100x			GCA_900093855.1	GCF_900093855.1	yes
NZ_FLZE01000160.1	342	97.66	100		scaffolds_20160007	Escherichia coli (E. coli)		562	SAMEA4350777	PRJEB14873	academisch medisch centrum	2016-12-3	n/a	major	Scaffold	full		100x			GCA_900093855.1	GCF_900093855.1	yes
NZ_FLZE01000162.1	341	99.71	100		scaffolds_20160007	Escherichia coli (E. coli)		562	SAMEA4350777	PRJEB14873	academisch medisch centrum	2016-12-3	n/a	major	Scaffold	full		100x			GCA_900093855.1	GCF_900093855.1	yes
NZ_FLZE01000164.1	339	99.71	100		scaffolds_20160007	Escherichia coli (E. coli)		562	SAMEA4350777	PRJEB14873	academisch medisch centrum	2016-12-3	n/a	major	Scaffold	full		100x			GCA_900093855.1	GCF_900093855.1	yes
NZ_FLZE01000165.1	335	100	100		scaffolds_20160007	Escherichia coli (E. coli)		562	SAMEA4350777	PRJEB14873	academisch medisch centrum	2016-12-3	n/a	major	Scaffold	full		100x			GCA_900093855.1	GCF_900093855.1	yes
NZ_FLZE01000166.1	332	100	100		scaffolds_20160007	Escherichia coli (E. coli)		562	SAMEA4350777	PRJEB14873	academisch medisch centrum	2016-12-3	n/a	major	Scaffold	full		100x			GCA_900093855.1	GCF_900093855.1	yes
NZ_FLZE01000168.1	328	100	100		scaffolds_20160007	Escherichia coli (E. coli)		562	SAMEA4350777	PRJEB14873	academisch medisch centrum	2016-12-3	n/a	major	Scaffold	full		100x			GCA_900093855.1	GCF_900093855.1	yes
NZ_FLZE01000169.1	328	100	100		scaffolds_20160007	Escherichia coli (E. coli)		562	SAMEA4350777	PRJEB14873	academisch medisch centrum	2016-12-3	n/a	major	Scaffold	full		100x			GCA_900093855.1	GCF_900093855.1	yes
NZ_FLZE01000170.1	327	100	100		scaffolds_20160007	Escherichia coli (E. coli)		562	SAMEA4350777	PRJEB14873	academisch medisch centrum	2016-12-3	n/a	major	Scaffold	full		100x			GCA_900093855.1	GCF_900093855.1	yes
NZ_FLZE01000171.1	325	97.28	100		scaffolds_20160007	Escherichia coli (E. coli)		562	SAMEA4350777	PRJEB14873	academisch medisch centrum	2016-12-3	n/a	major	Scaffold	full		100x			GCA_900093855.1	GCF_900093855.1	yes
NZ_FLZE01000172.1	323	99.69	100		scaffolds_20160007	Escherichia coli (E. coli)		562	SAMEA4350777	PRJEB14873	academisch medisch centrum	2016-12-3	n/a	major	Scaffold	full		100x			GCA_900093855.1	GCF_900093855.1	yes
NZ_FLZE01000173.1	322	100	100		scaffolds_20160007	Escherichia coli (E. coli)		562	SAMEA4350777	PRJEB14873	academisch medisch centrum	2016-12-3	n/a	major	Scaffold	full		100x			GCA_900093855.1	GCF_900093855.1	yes
NZ_FLZE01000174.1	319	99.69	100		scaffolds_20160007	Escherichia coli (E. coli)		562	SAMEA4350777	PRJEB14873	academisch medisch centrum	2016-12-3	n/a	major	Scaffold	full		100x			GCA_900093855.1	GCF_900093855.1	yes
NZ_FLZE01000175.1	317	98.15	100	WP_077250950.1	scaffolds_20160007	Escherichia coli (E. coli)		562	SAMEA4350777	PRJEB14873	academisch medisch centrum	2016-12-3	n/a	major	Scaffold	full		100x			GCA_900093855.1	GCF_900093855.1	yes
NZ_FLZE01000180.1	312	100	100		scaffolds_20160007	Escherichia coli (E. coli)		562	SAMEA4350777	PRJEB14873	academisch medisch centrum	2016-12-3	n/a	major	Scaffold	full		100x			GCA_900093855.1	GCF_900093855.1	yes
NZ_FLZE01000182.1	309	100	100		scaffolds_20160007	Escherichia coli (E. coli)		562	SAMEA4350777	PRJEB14873	academisch medisch centrum	2016-12-3	n/a	major	Scaffold	full		100x			GCA_900093855.1	GCF_900093855.1	yes
NZ_FLZE01000183.1	309	99.68	100		scaffolds_20160007	Escherichia coli (E. coli)		562	SAMEA4350777	PRJEB14873	academisch medisch centrum	2016-12-3	n/a	major	Scaffold	full		100x			GCA_900093855.1	GCF_900093855.1	yes
NZ_FLZE01000184.1	307	100	100	WP_114141997.1	scaffolds_20160007	Escherichia coli (E. coli)		562	SAMEA4350777	PRJEB14873	academisch medisch centrum	2016-12-3	n/a	major	Scaffold	full		100x			GCA_900093855.1	GCF_900093855.1	yes
NZ_FLZE01000185.1	306	100	100	WP_077250951.1	scaffolds_20160007	Escherichia coli (E. coli)		562	SAMEA4350777	PRJEB14873	academisch medisch centrum	2016-12-3	n/a	major	Scaffold	full		100x			GCA_900093855.1	GCF_900093855.1	yes
NZ_FLZE01000186.1	304	100	100		scaffolds_20160007	Escherichia coli (E. coli)		562	SAMEA4350777	PRJEB14873	academisch medisch centrum	2016-12-3	n/a	major	Scaffold	full		100x			GCA_900093855.1	GCF_900093855.1	yes
NZ_FLZE01000188.1	297	100	100		scaffolds_20160007	Escherichia coli (E. coli)		562	SAMEA4350777	PRJEB14873	academisch medisch centrum	2016-12-3	n/a	major	Scaffold	full		100x			GCA_900093855.1	GCF_900093855.1	yes
NZ_FLZE01000189.1	295	99.66	100		scaffolds_20160007	Escherichia coli (E. coli)		562	SAMEA4350777	PRJEB14873	academisch medisch centrum	2016-12-3	n/a	major	Scaffold	full		100x			GCA_900093855.1	GCF_900093855.1	yes
NZ_FLZE01000190.1	295	100	100		scaffolds_20160007	Escherichia coli (E. coli)		562	SAMEA4350777	PRJEB14873	academisch medisch centrum	2016-12-3	n/a	major	Scaffold	full		100x			GCA_900093855.1	GCF_900093855.1	yes
NZ_FLZE01000191.1	294	99.32	100		scaffolds_20160007	Escherichia coli (E. coli)		562	SAMEA4350777	PRJEB14873	academisch medisch centrum	2016-12-3	n/a	major	Scaffold	full		100x			GCA_900093855.1	GCF_900093855.1	yes
NZ_FLZE01000192.1	293	99.66	100		scaffolds_20160007	Escherichia coli (E. coli)		562	SAMEA4350777	PRJEB14873	academisch medisch centrum	2016-12-3	n/a	major	Scaffold	full		100x			GCA_900093855.1	GCF_900093855.1	yes
NZ_FLZE01000193.1	292	100	100		scaffolds_20160007	Escherichia coli (E. coli)		562	SAMEA4350777	PRJEB14873	academisch medisch centrum	2016-12-3	n/a	major	Scaffold	full		100x			GCA_900093855.1	GCF_900093855.1	yes
NZ_FLZE01000194.1	288	99.65	100		scaffolds_20160007	Escherichia coli (E. coli)		562	SAMEA4350777	PRJEB14873	academisch medisch centrum	2016-12-3	n/a	major	Scaffold	full		100x			GCA_900093855.1	GCF_900093855.1	yes
NZ_FLZE01000195.1	285	100	100		scaffolds_20160007	Escherichia coli (E. coli)		562	SAMEA4350777	PRJEB14873	academisch medisch centrum	2016-12-3	n/a	major	Scaffold	full		100x			GCA_900093855.1	GCF_900093855.1	yes
NZ_FLZE01000196.1	284	100	100		scaffolds_20160007	Escherichia coli (E. coli)		562	SAMEA4350777	PRJEB14873	academisch medisch centrum	2016-12-3	n/a	major	Scaffold	full		100x			GCA_900093855.1	GCF_900093855.1	yes
NZ_FLZE01000198.1	283	100	100		scaffolds_20160007	Escherichia coli (E. coli)		562	SAMEA4350777	PRJEB14873	academisch medisch centrum	2016-12-3	n/a	major	Scaffold	full		100x			GCA_900093855.1	GCF_900093855.1	yes
NZ_FLZE01000201.1	279	100	100		scaffolds_20160007	Escherichia coli (E. coli)		562	SAMEA4350777	PRJEB14873	academisch medisch centrum	2016-12-3	n/a	major	Scaffold	full		100x			GCA_900093855.1	GCF_900093855.1	yes
NZ_FLZE01000202.1	279	100	100		scaffolds_20160007	Escherichia coli (E. coli)		562	SAMEA4350777	PRJEB14873	academisch medisch centrum	2016-12-3	n/a	major	Scaffold	full		100x			GCA_900093855.1	GCF_900093855.1	yes
NZ_FLZE01000204.1	277	100	100		scaffolds_20160007	Escherichia coli (E. coli)		562	SAMEA4350777	PRJEB14873	academisch medisch centrum	2016-12-3	n/a	major	Scaffold	full		100x			GCA_900093855.1	GCF_900093855.1	yes
NZ_FLZE01000205.1	277	99.28	100		scaffolds_20160007	Escherichia coli (E. coli)		562	SAMEA4350777	PRJEB14873	academisch medisch centrum	2016-12-3	n/a	major	Scaffold	full		100x			GCA_900093855.1	GCF_900093855.1	yes
NZ_FLZE01000206.1	276	100	100		scaffolds_20160007	Escherichia coli (E. coli)		562	SAMEA4350777	PRJEB14873	academisch medisch centrum	2016-12-3	n/a	major	Scaffold	full		100x			GCA_900093855.1	GCF_900093855.1	yes
NZ_FLZE01000208.1	274	100	100		scaffolds_20160007	Escherichia coli (E. coli)		562	SAMEA4350777	PRJEB14873	academisch medisch centrum	2016-12-3	n/a	major	Scaffold	full		100x			GCA_900093855.1	GCF_900093855.1	yes
NZ_FLZE01000209.1	273	100	100		scaffolds_20160007	Escherichia coli (E. coli)		562	SAMEA4350777	PRJEB14873	academisch medisch centrum	2016-12-3	n/a	major	Scaffold	full		100x			GCA_900093855.1	GCF_900093855.1	yes
NZ_FLZE01000210.1	271	100	100		scaffolds_20160007	Escherichia coli (E. coli)		562	SAMEA4350777	PRJEB14873	academisch medisch centrum	2016-12-3	n/a	major	Scaffold	full		100x			GCA_900093855.1	GCF_900093855.1	yes
NZ_FLZE01000212.1	269	99.63	100		scaffolds_20160007	Escherichia coli (E. coli)		562	SAMEA4350777	PRJEB14873	academisch medisch centrum	2016-12-3	n/a	major	Scaffold	full		100x			GCA_900093855.1	GCF_900093855.1	yes
NZ_FLZE01000213.1	269	100	100		scaffolds_20160007	Escherichia coli (E. coli)		562	SAMEA4350777	PRJEB14873	academisch medisch centrum	2016-12-3	n/a	major	Scaffold	full		100x			GCA_900093855.1	GCF_900093855.1	yes
NZ_FLZE01000214.1	269	99.63	100		scaffolds_20160007	Escherichia coli (E. coli)		562	SAMEA4350777	PRJEB14873	academisch medisch centrum	2016-12-3	n/a	major	Scaffold	full		100x			GCA_900093855.1	GCF_900093855.1	yes
NZ_FLZE01000215.1	268	100	100		scaffolds_20160007	Escherichia coli (E. coli)		562	SAMEA4350777	PRJEB14873	academisch medisch centrum	2016-12-3	n/a	major	Scaffold	full		100x			GCA_900093855.1	GCF_900093855.1	yes
NZ_FLZE01000216.1	268	100	100		scaffolds_20160007	Escherichia coli (E. coli)		562	SAMEA4350777	PRJEB14873	academisch medisch centrum	2016-12-3	n/a	major	Scaffold	full		100x			GCA_900093855.1	GCF_900093855.1	yes
NZ_FLZE01000217.1	267	99.63	100		scaffolds_20160007	Escherichia coli (E. coli)		562	SAMEA4350777	PRJEB14873	academisch medisch centrum	2016-12-3	n/a	major	Scaffold	full		100x			GCA_900093855.1	GCF_900093855.1	yes
NZ_FLZE01000218.1	267	99.63	100		scaffolds_20160007	Escherichia coli (E. coli)		562	SAMEA4350777	PRJEB14873	academisch medisch centrum	2016-12-3	n/a	major	Scaffold	full		100x			GCA_900093855.1	GCF_900093855.1	yes
NZ_FLZE01000219.1	266	100	100		scaffolds_20160007	Escherichia coli (E. coli)		562	SAMEA4350777	PRJEB14873	academisch medisch centrum	2016-12-3	n/a	major	Scaffold	full		100x			GCA_900093855.1	GCF_900093855.1	yes
NZ_FLZE01000222.1	264	100	100		scaffolds_20160007	Escherichia coli (E. coli)		562	SAMEA4350777	PRJEB14873	academisch medisch centrum	2016-12-3	n/a	major	Scaffold	full		100x			GCA_900093855.1	GCF_900093855.1	yes
NZ_FLZE01000223.1	263	100	100		scaffolds_20160007	Escherichia coli (E. coli)		562	SAMEA4350777	PRJEB14873	academisch medisch centrum	2016-12-3	n/a	major	Scaffold	full		100x			GCA_900093855.1	GCF_900093855.1	yes
NZ_FLZE01000225.1	262	100	100		scaffolds_20160007	Escherichia coli (E. coli)		562	SAMEA4350777	PRJEB14873	academisch medisch centrum	2016-12-3	n/a	major	Scaffold	full		100x			GCA_900093855.1	GCF_900093855.1	yes
NZ_FLZE01000226.1	261	100	100		scaffolds_20160007	Escherichia coli (E. coli)		562	SAMEA4350777	PRJEB14873	academisch medisch centrum	2016-12-3	n/a	major	Scaffold	full		100x			GCA_900093855.1	GCF_900093855.1	yes
NZ_FLZE01000229.1	259	100	100		scaffolds_20160007	Escherichia coli (E. coli)		562	SAMEA4350777	PRJEB14873	academisch medisch centrum	2016-12-3	n/a	major	Scaffold	full		100x			GCA_900093855.1	GCF_900093855.1	yes
NZ_FLZE01000230.1	259	100	100		scaffolds_20160007	Escherichia coli (E. coli)		562	SAMEA4350777	PRJEB14873	academisch medisch centrum	2016-12-3	n/a	major	Scaffold	full		100x			GCA_900093855.1	GCF_900093855.1	yes
NZ_FLZE01000232.1	258	100	100		scaffolds_20160007	Escherichia coli (E. coli)		562	SAMEA4350777	PRJEB14873	academisch medisch centrum	2016-12-3	n/a	major	Scaffold	full		100x			GCA_900093855.1	GCF_900093855.1	yes
NZ_FLZE01000233.1	257	99.61	100		scaffolds_20160007	Escherichia coli (E. coli)		562	SAMEA4350777	PRJEB14873	academisch medisch centrum	2016-12-3	n/a	major	Scaffold	full		100x			GCA_900093855.1	GCF_900093855.1	yes
NZ_FLZE01000234.1	257	100	100		scaffolds_20160007	Escherichia coli (E. coli)		562	SAMEA4350777	PRJEB14873	academisch medisch centrum	2016-12-3	n/a	major	Scaffold	full		100x			GCA_900093855.1	GCF_900093855.1	yes
NZ_FLZE01000235.1	255	100	100		scaffolds_20160007	Escherichia coli (E. coli)		562	SAMEA4350777	PRJEB14873	academisch medisch centrum	2016-12-3	n/a	major	Scaffold	full		100x			GCA_900093855.1	GCF_900093855.1	yes
NZ_FLZE01000236.1	254	100	100		scaffolds_20160007	Escherichia coli (E. coli)		562	SAMEA4350777	PRJEB14873	academisch medisch centrum	2016-12-3	n/a	major	Scaffold	full		100x			GCA_900093855.1	GCF_900093855.1	yes
NZ_FLZE01000238.1	252	100	100		scaffolds_20160007	Escherichia coli (E. coli)		562	SAMEA4350777	PRJEB14873	academisch medisch centrum	2016-12-3	n/a	major	Scaffold	full		100x			GCA_900093855.1	GCF_900093855.1	yes
NZ_FLZE01000239.1	252	100	100		scaffolds_20160007	Escherichia coli (E. coli)		562	SAMEA4350777	PRJEB14873	academisch medisch centrum	2016-12-3	n/a	major	Scaffold	full		100x			GCA_900093855.1	GCF_900093855.1	yes
NZ_FLZE01000241.1	250	100	100		scaffolds_20160007	Escherichia coli (E. coli)		562	SAMEA4350777	PRJEB14873	academisch medisch centrum	2016-12-3	n/a	major	Scaffold	full		100x			GCA_900093855.1	GCF_900093855.1	yes
NZ_FLZE01000243.1	250	99.6	100		scaffolds_20160007	Escherichia coli (E. coli)		562	SAMEA4350777	PRJEB14873	academisch medisch centrum	2016-12-3	n/a	major	Scaffold	full		100x			GCA_900093855.1	GCF_900093855.1	yes
NZ_FLZE01000244.1	249	100	100		scaffolds_20160007	Escherichia coli (E. coli)		562	SAMEA4350777	PRJEB14873	academisch medisch centrum	2016-12-3	n/a	major	Scaffold	full		100x			GCA_900093855.1	GCF_900093855.1	yes
NZ_FLZE01000245.1	249	100	100		scaffolds_20160007	Escherichia coli (E. coli)		562	SAMEA4350777	PRJEB14873	academisch medisch centrum	2016-12-3	n/a	major	Scaffold	full		100x			GCA_900093855.1	GCF_900093855.1	yes
NZ_FLZE01000246.1	249	99.6	100		scaffolds_20160007	Escherichia coli (E. coli)		562	SAMEA4350777	PRJEB14873	academisch medisch centrum	2016-12-3	n/a	major	Scaffold	full		100x			GCA_900093855.1	GCF_900093855.1	yes
NZ_FLZE01000247.1	247	100	100		scaffolds_20160007	Escherichia coli (E. coli)		562	SAMEA4350777	PRJEB14873	academisch medisch centrum	2016-12-3	n/a	major	Scaffold	full		100x			GCA_900093855.1	GCF_900093855.1	yes
NZ_FLZE01000248.1	247	100	100		scaffolds_20160007	Escherichia coli (E. coli)		562	SAMEA4350777	PRJEB14873	academisch medisch centrum	2016-12-3	n/a	major	Scaffold	full		100x			GCA_900093855.1	GCF_900093855.1	yes
NZ_FLZE01000249.1	247	100	100		scaffolds_20160007	Escherichia coli (E. coli)		562	SAMEA4350777	PRJEB14873	academisch medisch centrum	2016-12-3	n/a	major	Scaffold	full		100x			GCA_900093855.1	GCF_900093855.1	yes
NZ_FLZE01000250.1	243	100	100		scaffolds_20160007	Escherichia coli (E. coli)		562	SAMEA4350777	PRJEB14873	academisch medisch centrum	2016-12-3	n/a	major	Scaffold	full		100x			GCA_900093855.1	GCF_900093855.1	yes
NZ_FLZE01000251.1	243	100	100		scaffolds_20160007	Escherichia coli (E. coli)		562	SAMEA4350777	PRJEB14873	academisch medisch centrum	2016-12-3	n/a	major	Scaffold	full		100x			GCA_900093855.1	GCF_900093855.1	yes
NZ_FLZE01000253.1	242	99.17	100		scaffolds_20160007	Escherichia coli (E. coli)		562	SAMEA4350777	PRJEB14873	academisch medisch centrum	2016-12-3	n/a	major	Scaffold	full		100x			GCA_900093855.1	GCF_900093855.1	yes
NZ_FLZE01000254.1	241	100	100		scaffolds_20160007	Escherichia coli (E. coli)		562	SAMEA4350777	PRJEB14873	academisch medisch centrum	2016-12-3	n/a	major	Scaffold	full		100x			GCA_900093855.1	GCF_900093855.1	yes
NZ_FLZE01000255.1	241	100	100		scaffolds_20160007	Escherichia coli (E. coli)		562	SAMEA4350777	PRJEB14873	academisch medisch centrum	2016-12-3	n/a	major	Scaffold	full		100x			GCA_900093855.1	GCF_900093855.1	yes
NZ_FLZE01000256.1	240	100	100		scaffolds_20160007	Escherichia coli (E. coli)		562	SAMEA4350777	PRJEB14873	academisch medisch centrum	2016-12-3	n/a	major	Scaffold	full		100x			GCA_900093855.1	GCF_900093855.1	yes
NZ_FLZE01000257.1	240	99.59	100		scaffolds_20160007	Escherichia coli (E. coli)		562	SAMEA4350777	PRJEB14873	academisch medisch centrum	2016-12-3	n/a	major	Scaffold	full		100x			GCA_900093855.1	GCF_900093855.1	yes
NZ_FLZE01000259.1	239	100	100		scaffolds_20160007	Escherichia coli (E. coli)		562	SAMEA4350777	PRJEB14873	academisch medisch centrum	2016-12-3	n/a	major	Scaffold	full		100x			GCA_900093855.1	GCF_900093855.1	yes
NZ_FLZE01000260.1	239	100	100		scaffolds_20160007	Escherichia coli (E. coli)		562	SAMEA4350777	PRJEB14873	academisch medisch centrum	2016-12-3	n/a	major	Scaffold	full		100x			GCA_900093855.1	GCF_900093855.1	yes
NZ_FLZE01000262.1	239	100	100		scaffolds_20160007	Escherichia coli (E. coli)		562	SAMEA4350777	PRJEB14873	academisch medisch centrum	2016-12-3	n/a	major	Scaffold	full		100x			GCA_900093855.1	GCF_900093855.1	yes
NZ_FLZE01000266.1	238	100	100		scaffolds_20160007	Escherichia coli (E. coli)		562	SAMEA4350777	PRJEB14873	academisch medisch centrum	2016-12-3	n/a	major	Scaffold	full		100x			GCA_900093855.1	GCF_900093855.1	yes
NZ_FLZE01000267.1	237	100	100		scaffolds_20160007	Escherichia coli (E. coli)		562	SAMEA4350777	PRJEB14873	academisch medisch centrum	2016-12-3	n/a	major	Scaffold	full		100x			GCA_900093855.1	GCF_900093855.1	yes
NZ_FLZE01000268.1	237	100	100		scaffolds_20160007	Escherichia coli (E. coli)		562	SAMEA4350777	PRJEB14873	academisch medisch centrum	2016-12-3	n/a	major	Scaffold	full		100x			GCA_900093855.1	GCF_900093855.1	yes
NZ_FLZE01000269.1	237	100	100		scaffolds_20160007	Escherichia coli (E. coli)		562	SAMEA4350777	PRJEB14873	academisch medisch centrum	2016-12-3	n/a	major	Scaffold	full		100x			GCA_900093855.1	GCF_900093855.1	yes
NZ_FLZE01000270.1	237	100	100		scaffolds_20160007	Escherichia coli (E. coli)		562	SAMEA4350777	PRJEB14873	academisch medisch centrum	2016-12-3	n/a	major	Scaffold	full		100x			GCA_900093855.1	GCF_900093855.1	yes
NZ_FLZE01000272.1	235	100	100		scaffolds_20160007	Escherichia coli (E. coli)		562	SAMEA4350777	PRJEB14873	academisch medisch centrum	2016-12-3	n/a	major	Scaffold	full		100x			GCA_900093855.1	GCF_900093855.1	yes
NZ_FLZE01000273.1	235	100	100		scaffolds_20160007	Escherichia coli (E. coli)		562	SAMEA4350777	PRJEB14873	academisch medisch centrum	2016-12-3	n/a	major	Scaffold	full		100x			GCA_900093855.1	GCF_900093855.1	yes
NZ_FLZE01000275.1	235	100	100		scaffolds_20160007	Escherichia coli (E. coli)		562	SAMEA4350777	PRJEB14873	academisch medisch centrum	2016-12-3	n/a	major	Scaffold	full		100x			GCA_900093855.1	GCF_900093855.1	yes
NZ_FLZE01000276.1	234	100	100		scaffolds_20160007	Escherichia coli (E. coli)		562	SAMEA4350777	PRJEB14873	academisch medisch centrum	2016-12-3	n/a	major	Scaffold	full		100x			GCA_900093855.1	GCF_900093855.1	yes
NZ_FLZE01000277.1	234	100	100		scaffolds_20160007	Escherichia coli (E. coli)		562	SAMEA4350777	PRJEB14873	academisch medisch centrum	2016-12-3	n/a	major	Scaffold	full		100x			GCA_900093855.1	GCF_900093855.1	yes
NZ_FLZE01000280.1	233	100	100		scaffolds_20160007	Escherichia coli (E. coli)		562	SAMEA4350777	PRJEB14873	academisch medisch centrum	2016-12-3	n/a	major	Scaffold	full		100x			GCA_900093855.1	GCF_900093855.1	yes
NZ_FLZE01000281.1	233	99.57	100		scaffolds_20160007	Escherichia coli (E. coli)		562	SAMEA4350777	PRJEB14873	academisch medisch centrum	2016-12-3	n/a	major	Scaffold	full		100x			GCA_900093855.1	GCF_900093855.1	yes
NZ_FLZE01000282.1	233	100	100		scaffolds_20160007	Escherichia coli (E. coli)		562	SAMEA4350777	PRJEB14873	academisch medisch centrum	2016-12-3	n/a	major	Scaffold	full		100x			GCA_900093855.1	GCF_900093855.1	yes
NZ_FLZE01000283.1	232	99.14	100		scaffolds_20160007	Escherichia coli (E. coli)		562	SAMEA4350777	PRJEB14873	academisch medisch centrum	2016-12-3	n/a	major	Scaffold	full		100x			GCA_900093855.1	GCF_900093855.1	yes
NZ_FLZE01000285.1	231	100	100		scaffolds_20160007	Escherichia coli (E. coli)		562	SAMEA4350777	PRJEB14873	academisch medisch centrum	2016-12-3	n/a	major	Scaffold	full		100x			GCA_900093855.1	GCF_900093855.1	yes
NZ_FLZE01000286.1	231	100	100		scaffolds_20160007	Escherichia coli (E. coli)		562	SAMEA4350777	PRJEB14873	academisch medisch centrum	2016-12-3	n/a	major	Scaffold	full		100x			GCA_900093855.1	GCF_900093855.1	yes
NZ_FLZE01000287.1	230	100	100		scaffolds_20160007	Escherichia coli (E. coli)		562	SAMEA4350777	PRJEB14873	academisch medisch centrum	2016-12-3	n/a	major	Scaffold	full		100x			GCA_900093855.1	GCF_900093855.1	yes
NZ_FLZE01000288.1	230	99.57	100		scaffolds_20160007	Escherichia coli (E. coli)		562	SAMEA4350777	PRJEB14873	academisch medisch centrum	2016-12-3	n/a	major	Scaffold	full		100x			GCA_900093855.1	GCF_900093855.1	yes
NZ_FLZE01000289.1	229	99.56	100		scaffolds_20160007	Escherichia coli (E. coli)		562	SAMEA4350777	PRJEB14873	academisch medisch centrum	2016-12-3	n/a	major	Scaffold	full		100x			GCA_900093855.1	GCF_900093855.1	yes
NZ_FLZE01000290.1	229	100	100		scaffolds_20160007	Escherichia coli (E. coli)		562	SAMEA4350777	PRJEB14873	academisch medisch centrum	2016-12-3	n/a	major	Scaffold	full		100x			GCA_900093855.1	GCF_900093855.1	yes
NZ_FLZE01000291.1	229	100	100		scaffolds_20160007	Escherichia coli (E. coli)		562	SAMEA4350777	PRJEB14873	academisch medisch centrum	2016-12-3	n/a	major	Scaffold	full		100x			GCA_900093855.1	GCF_900093855.1	yes
NZ_FLZE01000292.1	229	100	100		scaffolds_20160007	Escherichia coli (E. coli)		562	SAMEA4350777	PRJEB14873	academisch medisch centrum	2016-12-3	n/a	major	Scaffold	full		100x			GCA_900093855.1	GCF_900093855.1	yes
NZ_FLZE01000293.1	229	100	100		scaffolds_20160007	Escherichia coli (E. coli)		562	SAMEA4350777	PRJEB14873	academisch medisch centrum	2016-12-3	n/a	major	Scaffold	full		100x			GCA_900093855.1	GCF_900093855.1	yes
NZ_FLZF01000124.1	842	99.76	100	WP_072794626.1;WP_072794625.1	scaffolds_C318	Escherichia coli (E. coli)		562	SAMEA4350787	PRJEB14873	academisch medisch centrum	2016-12-3	n/a	major	Scaffold	full		100x			GCA_900093865.1	GCF_900093865.1	yes
NZ_FLZF01000138.1	656	99.7	100	WP_072842326.1	scaffolds_C318	Escherichia coli (E. coli)		562	SAMEA4350787	PRJEB14873	academisch medisch centrum	2016-12-3	n/a	major	Scaffold	full		100x			GCA_900093865.1	GCF_900093865.1	yes
NZ_FLZF01000141.1	579	99.83	100	WP_072842330.1	scaffolds_C318	Escherichia coli (E. coli)		562	SAMEA4350787	PRJEB14873	academisch medisch centrum	2016-12-3	n/a	major	Scaffold	full		100x			GCA_900093865.1	GCF_900093865.1	yes
NZ_FLZF01000145.1	512	99.41	100		scaffolds_C318	Escherichia coli (E. coli)		562	SAMEA4350787	PRJEB14873	academisch medisch centrum	2016-12-3	n/a	major	Scaffold	full		100x			GCA_900093865.1	GCF_900093865.1	yes
NZ_FLZF01000146.1	510	100	100		scaffolds_C318	Escherichia coli (E. coli)		562	SAMEA4350787	PRJEB14873	academisch medisch centrum	2016-12-3	n/a	major	Scaffold	full		100x			GCA_900093865.1	GCF_900093865.1	yes
NZ_FLZF01000147.1	498	99	100		scaffolds_C318	Escherichia coli (E. coli)		562	SAMEA4350787	PRJEB14873	academisch medisch centrum	2016-12-3	n/a	major	Scaffold	full		100x			GCA_900093865.1	GCF_900093865.1	yes
NZ_FLZF01000149.1	492	100	100		scaffolds_C318	Escherichia coli (E. coli)		562	SAMEA4350787	PRJEB14873	academisch medisch centrum	2016-12-3	n/a	major	Scaffold	full		100x			GCA_900093865.1	GCF_900093865.1	yes
NZ_FLZF01000150.1	492	99.8	100	WP_072842332.1	scaffolds_C318	Escherichia coli (E. coli)		562	SAMEA4350787	PRJEB14873	academisch medisch centrum	2016-12-3	n/a	major	Scaffold	full		100x			GCA_900093865.1	GCF_900093865.1	yes
NZ_FLZF01000151.1	477	100	100		scaffolds_C318	Escherichia coli (E. coli)		562	SAMEA4350787	PRJEB14873	academisch medisch centrum	2016-12-3	n/a	major	Scaffold	full		100x			GCA_900093865.1	GCF_900093865.1	yes
NZ_FLZF01000152.1	475	99.79	100		scaffolds_C318	Escherichia coli (E. coli)		562	SAMEA4350787	PRJEB14873	academisch medisch centrum	2016-12-3	n/a	major	Scaffold	full		100x			GCA_900093865.1	GCF_900093865.1	yes
NZ_FLZF01000154.1	472	99.79	100		scaffolds_C318	Escherichia coli (E. coli)		562	SAMEA4350787	PRJEB14873	academisch medisch centrum	2016-12-3	n/a	major	Scaffold	full		100x			GCA_900093865.1	GCF_900093865.1	yes
NZ_FLZF01000156.1	465	100	100		scaffolds_C318	Escherichia coli (E. coli)		562	SAMEA4350787	PRJEB14873	academisch medisch centrum	2016-12-3	n/a	major	Scaffold	full		100x			GCA_900093865.1	GCF_900093865.1	yes
NZ_FLZF01000157.1	456	100	100		scaffolds_C318	Escherichia coli (E. coli)		562	SAMEA4350787	PRJEB14873	academisch medisch centrum	2016-12-3	n/a	major	Scaffold	full		100x			GCA_900093865.1	GCF_900093865.1	yes
NZ_FLZF01000158.1	449	100	100		scaffolds_C318	Escherichia coli (E. coli)		562	SAMEA4350787	PRJEB14873	academisch medisch centrum	2016-12-3	n/a	major	Scaffold	full		100x			GCA_900093865.1	GCF_900093865.1	yes
NZ_FLZF01000160.1	438	100	100		scaffolds_C318	Escherichia coli (E. coli)		562	SAMEA4350787	PRJEB14873	academisch medisch centrum	2016-12-3	n/a	major	Scaffold	full		100x			GCA_900093865.1	GCF_900093865.1	yes
NZ_FLZF01000161.1	434	99.77	100		scaffolds_C318	Escherichia coli (E. coli)		562	SAMEA4350787	PRJEB14873	academisch medisch centrum	2016-12-3	n/a	major	Scaffold	full		100x			GCA_900093865.1	GCF_900093865.1	yes
NZ_FLZF01000162.1	430	100	100		scaffolds_C318	Escherichia coli (E. coli)		562	SAMEA4350787	PRJEB14873	academisch medisch centrum	2016-12-3	n/a	major	Scaffold	full		100x			GCA_900093865.1	GCF_900093865.1	yes
NZ_FLZF01000163.1	423	100	100		scaffolds_C318	Escherichia coli (E. coli)		562	SAMEA4350787	PRJEB14873	academisch medisch centrum	2016-12-3	n/a	major	Scaffold	full		100x			GCA_900093865.1	GCF_900093865.1	yes
NZ_FLZF01000165.1	419	100	100	WP_072842334.1	scaffolds_C318	Escherichia coli (E. coli)		562	SAMEA4350787	PRJEB14873	academisch medisch centrum	2016-12-3	n/a	major	Scaffold	full		100x			GCA_900093865.1	GCF_900093865.1	yes
NZ_FLZF01000167.1	410	100	100		scaffolds_C318	Escherichia coli (E. coli)		562	SAMEA4350787	PRJEB14873	academisch medisch centrum	2016-12-3	n/a	major	Scaffold	full		100x			GCA_900093865.1	GCF_900093865.1	yes
NZ_FLZF01000168.1	409	99.51	100		scaffolds_C318	Escherichia coli (E. coli)		562	SAMEA4350787	PRJEB14873	academisch medisch centrum	2016-12-3	n/a	major	Scaffold	full		100x			GCA_900093865.1	GCF_900093865.1	yes
NZ_FLZF01000169.1	404	99.75	100	WP_072842336.1	scaffolds_C318	Escherichia coli (E. coli)		562	SAMEA4350787	PRJEB14873	academisch medisch centrum	2016-12-3	n/a	major	Scaffold	full		100x			GCA_900093865.1	GCF_900093865.1	yes
NZ_FLZF01000171.1	395	100	100		scaffolds_C318	Escherichia coli (E. coli)		562	SAMEA4350787	PRJEB14873	academisch medisch centrum	2016-12-3	n/a	major	Scaffold	full		100x			GCA_900093865.1	GCF_900093865.1	yes
NZ_FLZF01000172.1	392	100	100		scaffolds_C318	Escherichia coli (E. coli)		562	SAMEA4350787	PRJEB14873	academisch medisch centrum	2016-12-3	n/a	major	Scaffold	full		100x			GCA_900093865.1	GCF_900093865.1	yes
NZ_FLZF01000173.1	390	100	100		scaffolds_C318	Escherichia coli (E. coli)		562	SAMEA4350787	PRJEB14873	academisch medisch centrum	2016-12-3	n/a	major	Scaffold	full		100x			GCA_900093865.1	GCF_900093865.1	yes
NZ_FLZF01000174.1	390	99.23	100		scaffolds_C318	Escherichia coli (E. coli)		562	SAMEA4350787	PRJEB14873	academisch medisch centrum	2016-12-3	n/a	major	Scaffold	full		100x			GCA_900093865.1	GCF_900093865.1	yes
NZ_FLZF01000175.1	389	100	100		scaffolds_C318	Escherichia coli (E. coli)		562	SAMEA4350787	PRJEB14873	academisch medisch centrum	2016-12-3	n/a	major	Scaffold	full		100x			GCA_900093865.1	GCF_900093865.1	yes
NZ_FLZF01000177.1	380	100	100		scaffolds_C318	Escherichia coli (E. coli)		562	SAMEA4350787	PRJEB14873	academisch medisch centrum	2016-12-3	n/a	major	Scaffold	full		100x			GCA_900093865.1	GCF_900093865.1	yes
NZ_FLZF01000178.1	380	100	100		scaffolds_C318	Escherichia coli (E. coli)		562	SAMEA4350787	PRJEB14873	academisch medisch centrum	2016-12-3	n/a	major	Scaffold	full		100x			GCA_900093865.1	GCF_900093865.1	yes
NZ_FLZF01000180.1	376	100	100	WP_072775670.1	scaffolds_C318	Escherichia coli (E. coli)		562	SAMEA4350787	PRJEB14873	academisch medisch centrum	2016-12-3	n/a	major	Scaffold	full		100x			GCA_900093865.1	GCF_900093865.1	yes
NZ_FLZF01000181.1	372	100	100		scaffolds_C318	Escherichia coli (E. coli)		562	SAMEA4350787	PRJEB14873	academisch medisch centrum	2016-12-3	n/a	major	Scaffold	full		100x			GCA_900093865.1	GCF_900093865.1	yes
NZ_FLZF01000182.1	371	100	100		scaffolds_C318	Escherichia coli (E. coli)		562	SAMEA4350787	PRJEB14873	academisch medisch centrum	2016-12-3	n/a	major	Scaffold	full		100x			GCA_900093865.1	GCF_900093865.1	yes
NZ_FLZF01000183.1	370	100	100	WP_072842338.1	scaffolds_C318	Escherichia coli (E. coli)		562	SAMEA4350787	PRJEB14873	academisch medisch centrum	2016-12-3	n/a	major	Scaffold	full		100x			GCA_900093865.1	GCF_900093865.1	yes
NZ_FLZF01000184.1	369	100	100		scaffolds_C318	Escherichia coli (E. coli)		562	SAMEA4350787	PRJEB14873	academisch medisch centrum	2016-12-3	n/a	major	Scaffold	full		100x			GCA_900093865.1	GCF_900093865.1	yes
NZ_FLZF01000185.1	368	99.73	100		scaffolds_C318	Escherichia coli (E. coli)		562	SAMEA4350787	PRJEB14873	academisch medisch centrum	2016-12-3	n/a	major	Scaffold	full		100x			GCA_900093865.1	GCF_900093865.1	yes
NZ_FLZF01000186.1	366	99.73	100		scaffolds_C318	Escherichia coli (E. coli)		562	SAMEA4350787	PRJEB14873	academisch medisch centrum	2016-12-3	n/a	major	Scaffold	full		100x			GCA_900093865.1	GCF_900093865.1	yes
NZ_FLZF01000187.1	366	99.73	100		scaffolds_C318	Escherichia coli (E. coli)		562	SAMEA4350787	PRJEB14873	academisch medisch centrum	2016-12-3	n/a	major	Scaffold	full		100x			GCA_900093865.1	GCF_900093865.1	yes
NZ_FLZF01000189.1	364	100	100		scaffolds_C318	Escherichia coli (E. coli)		562	SAMEA4350787	PRJEB14873	academisch medisch centrum	2016-12-3	n/a	major	Scaffold	full		100x			GCA_900093865.1	GCF_900093865.1	yes
NZ_FLZF01000190.1	363	100	100		scaffolds_C318	Escherichia coli (E. coli)		562	SAMEA4350787	PRJEB14873	academisch medisch centrum	2016-12-3	n/a	major	Scaffold	full		100x			GCA_900093865.1	GCF_900093865.1	yes
NZ_FLZF01000191.1	363	100	100		scaffolds_C318	Escherichia coli (E. coli)		562	SAMEA4350787	PRJEB14873	academisch medisch centrum	2016-12-3	n/a	major	Scaffold	full		100x			GCA_900093865.1	GCF_900093865.1	yes
NZ_FLZF01000192.1	361	100	100		scaffolds_C318	Escherichia coli (E. coli)		562	SAMEA4350787	PRJEB14873	academisch medisch centrum	2016-12-3	n/a	major	Scaffold	full		100x			GCA_900093865.1	GCF_900093865.1	yes
NZ_FLZF01000193.1	359	99.44	100		scaffolds_C318	Escherichia coli (E. coli)		562	SAMEA4350787	PRJEB14873	academisch medisch centrum	2016-12-3	n/a	major	Scaffold	full		100x			GCA_900093865.1	GCF_900093865.1	yes
NZ_FLZF01000194.1	359	99.72	100	WP_072794623.1	scaffolds_C318	Escherichia coli (E. coli)		562	SAMEA4350787	PRJEB14873	academisch medisch centrum	2016-12-3	n/a	major	Scaffold	full		100x			GCA_900093865.1	GCF_900093865.1	yes
NZ_FLZF01000195.1	359	99.44	100		scaffolds_C318	Escherichia coli (E. coli)		562	SAMEA4350787	PRJEB14873	academisch medisch centrum	2016-12-3	n/a	major	Scaffold	full		100x			GCA_900093865.1	GCF_900093865.1	yes
NZ_FLZF01000198.1	357	100	100	WP_077251028.1	scaffolds_C318	Escherichia coli (E. coli)		562	SAMEA4350787	PRJEB14873	academisch medisch centrum	2016-12-3	n/a	major	Scaffold	full		100x			GCA_900093865.1	GCF_900093865.1	yes
NZ_FLZF01000199.1	357	100	100		scaffolds_C318	Escherichia coli (E. coli)		562	SAMEA4350787	PRJEB14873	academisch medisch centrum	2016-12-3	n/a	major	Scaffold	full		100x			GCA_900093865.1	GCF_900093865.1	yes
NZ_FLZF01000200.1	357	100	100		scaffolds_C318	Escherichia coli (E. coli)		562	SAMEA4350787	PRJEB14873	academisch medisch centrum	2016-12-3	n/a	major	Scaffold	full		100x			GCA_900093865.1	GCF_900093865.1	yes
NZ_FLZF01000201.1	355	99.72	100		scaffolds_C318	Escherichia coli (E. coli)		562	SAMEA4350787	PRJEB14873	academisch medisch centrum	2016-12-3	n/a	major	Scaffold	full		100x			GCA_900093865.1	GCF_900093865.1	yes
NZ_FLZF01000202.1	354	99.15	100		scaffolds_C318	Escherichia coli (E. coli)		562	SAMEA4350787	PRJEB14873	academisch medisch centrum	2016-12-3	n/a	major	Scaffold	full		100x			GCA_900093865.1	GCF_900093865.1	yes
NZ_FLZF01000203.1	354	100	100		scaffolds_C318	Escherichia coli (E. coli)		562	SAMEA4350787	PRJEB14873	academisch medisch centrum	2016-12-3	n/a	major	Scaffold	full		100x			GCA_900093865.1	GCF_900093865.1	yes
NZ_FLZF01000204.1	354	100	100	WP_077251029.1	scaffolds_C318	Escherichia coli (E. coli)		562	SAMEA4350787	PRJEB14873	academisch medisch centrum	2016-12-3	n/a	major	Scaffold	full		100x			GCA_900093865.1	GCF_900093865.1	yes
NZ_FLZF01000205.1	353	100	100		scaffolds_C318	Escherichia coli (E. coli)		562	SAMEA4350787	PRJEB14873	academisch medisch centrum	2016-12-3	n/a	major	Scaffold	full		100x			GCA_900093865.1	GCF_900093865.1	yes
NZ_FLZF01000206.1	353	99.72	100		scaffolds_C318	Escherichia coli (E. coli)		562	SAMEA4350787	PRJEB14873	academisch medisch centrum	2016-12-3	n/a	major	Scaffold	full		100x			GCA_900093865.1	GCF_900093865.1	yes
NZ_FLZF01000208.1	351	100	100		scaffolds_C318	Escherichia coli (E. coli)		562	SAMEA4350787	PRJEB14873	academisch medisch centrum	2016-12-3	n/a	major	Scaffold	full		100x			GCA_900093865.1	GCF_900093865.1	yes
NZ_FLZF01000209.1	350	100	100		scaffolds_C318	Escherichia coli (E. coli)		562	SAMEA4350787	PRJEB14873	academisch medisch centrum	2016-12-3	n/a	major	Scaffold	full		100x			GCA_900093865.1	GCF_900093865.1	yes
NZ_FLZF01000210.1	349	100	100		scaffolds_C318	Escherichia coli (E. coli)		562	SAMEA4350787	PRJEB14873	academisch medisch centrum	2016-12-3	n/a	major	Scaffold	full		100x			GCA_900093865.1	GCF_900093865.1	yes
NZ_FLZF01000211.1	348	99.43	100		scaffolds_C318	Escherichia coli (E. coli)		562	SAMEA4350787	PRJEB14873	academisch medisch centrum	2016-12-3	n/a	major	Scaffold	full		100x			GCA_900093865.1	GCF_900093865.1	yes
NZ_FLZF01000212.1	348	100	100	WP_072842340.1	scaffolds_C318	Escherichia coli (E. coli)		562	SAMEA4350787	PRJEB14873	academisch medisch centrum	2016-12-3	n/a	major	Scaffold	full		100x			GCA_900093865.1	GCF_900093865.1	yes
NZ_FLZF01000213.1	347	99.42	100		scaffolds_C318	Escherichia coli (E. coli)		562	SAMEA4350787	PRJEB14873	academisch medisch centrum	2016-12-3	n/a	major	Scaffold	full		100x			GCA_900093865.1	GCF_900093865.1	yes
NZ_FLZF01000214.1	346	100	100	WP_072794693.1	scaffolds_C318	Escherichia coli (E. coli)		562	SAMEA4350787	PRJEB14873	academisch medisch centrum	2016-12-3	n/a	major	Scaffold	full		100x			GCA_900093865.1	GCF_900093865.1	yes
NZ_FLZF01000215.1	345	100	100		scaffolds_C318	Escherichia coli (E. coli)		562	SAMEA4350787	PRJEB14873	academisch medisch centrum	2016-12-3	n/a	major	Scaffold	full		100x			GCA_900093865.1	GCF_900093865.1	yes
NZ_FLZF01000216.1	345	99.71	100		scaffolds_C318	Escherichia coli (E. coli)		562	SAMEA4350787	PRJEB14873	academisch medisch centrum	2016-12-3	n/a	major	Scaffold	full		100x			GCA_900093865.1	GCF_900093865.1	yes
NZ_FLZF01000218.1	344	100	100		scaffolds_C318	Escherichia coli (E. coli)		562	SAMEA4350787	PRJEB14873	academisch medisch centrum	2016-12-3	n/a	major	Scaffold	full		100x			GCA_900093865.1	GCF_900093865.1	yes
NZ_FLZF01000220.1	341	100	100		scaffolds_C318	Escherichia coli (E. coli)		562	SAMEA4350787	PRJEB14873	academisch medisch centrum	2016-12-3	n/a	major	Scaffold	full		100x			GCA_900093865.1	GCF_900093865.1	yes
NZ_FLZF01000221.1	341	100	100		scaffolds_C318	Escherichia coli (E. coli)		562	SAMEA4350787	PRJEB14873	academisch medisch centrum	2016-12-3	n/a	major	Scaffold	full		100x			GCA_900093865.1	GCF_900093865.1	yes
NZ_FLZF01000223.1	340	100	100		scaffolds_C318	Escherichia coli (E. coli)		562	SAMEA4350787	PRJEB14873	academisch medisch centrum	2016-12-3	n/a	major	Scaffold	full		100x			GCA_900093865.1	GCF_900093865.1	yes
NZ_FLZF01000224.1	339	100	100		scaffolds_C318	Escherichia coli (E. coli)		562	SAMEA4350787	PRJEB14873	academisch medisch centrum	2016-12-3	n/a	major	Scaffold	full		100x			GCA_900093865.1	GCF_900093865.1	yes
NZ_FLZF01000225.1	338	99.41	100		scaffolds_C318	Escherichia coli (E. coli)		562	SAMEA4350787	PRJEB14873	academisch medisch centrum	2016-12-3	n/a	major	Scaffold	full		100x			GCA_900093865.1	GCF_900093865.1	yes
NZ_FLZF01000227.1	335	99.4	100		scaffolds_C318	Escherichia coli (E. coli)		562	SAMEA4350787	PRJEB14873	academisch medisch centrum	2016-12-3	n/a	major	Scaffold	full		100x			GCA_900093865.1	GCF_900093865.1	yes
NZ_FLZF01000228.1	335	99.7	100		scaffolds_C318	Escherichia coli (E. coli)		562	SAMEA4350787	PRJEB14873	academisch medisch centrum	2016-12-3	n/a	major	Scaffold	full		100x			GCA_900093865.1	GCF_900093865.1	yes
NZ_FLZF01000229.1	333	100	100		scaffolds_C318	Escherichia coli (E. coli)		562	SAMEA4350787	PRJEB14873	academisch medisch centrum	2016-12-3	n/a	major	Scaffold	full		100x			GCA_900093865.1	GCF_900093865.1	yes
NZ_FLZF01000230.1	333	100	100	WP_114141885.1	scaffolds_C318	Escherichia coli (E. coli)		562	SAMEA4350787	PRJEB14873	academisch medisch centrum	2016-12-3	n/a	major	Scaffold	full		100x			GCA_900093865.1	GCF_900093865.1	yes
NZ_FLZF01000231.1	331	100	100	WP_114141886.1	scaffolds_C318	Escherichia coli (E. coli)		562	SAMEA4350787	PRJEB14873	academisch medisch centrum	2016-12-3	n/a	major	Scaffold	full		100x			GCA_900093865.1	GCF_900093865.1	yes
NZ_FLZF01000232.1	330	100	100		scaffolds_C318	Escherichia coli (E. coli)		562	SAMEA4350787	PRJEB14873	academisch medisch centrum	2016-12-3	n/a	major	Scaffold	full		100x			GCA_900093865.1	GCF_900093865.1	yes
NZ_FLZF01000233.1	330	100	100	WP_077250804.1	scaffolds_C318	Escherichia coli (E. coli)		562	SAMEA4350787	PRJEB14873	academisch medisch centrum	2016-12-3	n/a	major	Scaffold	full		100x			GCA_900093865.1	GCF_900093865.1	yes
NZ_FLZF01000234.1	330	99.7	100		scaffolds_C318	Escherichia coli (E. coli)		562	SAMEA4350787	PRJEB14873	academisch medisch centrum	2016-12-3	n/a	major	Scaffold	full		100x			GCA_900093865.1	GCF_900093865.1	yes
NZ_FLZF01000235.1	328	99.7	100		scaffolds_C318	Escherichia coli (E. coli)		562	SAMEA4350787	PRJEB14873	academisch medisch centrum	2016-12-3	n/a	major	Scaffold	full		100x			GCA_900093865.1	GCF_900093865.1	yes
NZ_FLZF01000236.1	327	99.69	100		scaffolds_C318	Escherichia coli (E. coli)		562	SAMEA4350787	PRJEB14873	academisch medisch centrum	2016-12-3	n/a	major	Scaffold	full		100x			GCA_900093865.1	GCF_900093865.1	yes
NZ_FLZF01000238.1	327	99.69	100	WP_077251036.1	scaffolds_C318	Escherichia coli (E. coli)		562	SAMEA4350787	PRJEB14873	academisch medisch centrum	2016-12-3	n/a	major	Scaffold	full		100x			GCA_900093865.1	GCF_900093865.1	yes
NZ_FLZF01000239.1	326	99.69	100		scaffolds_C318	Escherichia coli (E. coli)		562	SAMEA4350787	PRJEB14873	academisch medisch centrum	2016-12-3	n/a	major	Scaffold	full		100x			GCA_900093865.1	GCF_900093865.1	yes
NZ_FLZF01000240.1	326	99.69	100		scaffolds_C318	Escherichia coli (E. coli)		562	SAMEA4350787	PRJEB14873	academisch medisch centrum	2016-12-3	n/a	major	Scaffold	full		100x			GCA_900093865.1	GCF_900093865.1	yes
NZ_FLZF01000241.1	326	100	100		scaffolds_C318	Escherichia coli (E. coli)		562	SAMEA4350787	PRJEB14873	academisch medisch centrum	2016-12-3	n/a	major	Scaffold	full		100x			GCA_900093865.1	GCF_900093865.1	yes
NZ_FLZF01000243.1	325	100	100		scaffolds_C318	Escherichia coli (E. coli)		562	SAMEA4350787	PRJEB14873	academisch medisch centrum	2016-12-3	n/a	major	Scaffold	full		100x			GCA_900093865.1	GCF_900093865.1	yes
NZ_FLZF01000244.1	324	99.38	100		scaffolds_C318	Escherichia coli (E. coli)		562	SAMEA4350787	PRJEB14873	academisch medisch centrum	2016-12-3	n/a	major	Scaffold	full		100x			GCA_900093865.1	GCF_900093865.1	yes
NZ_FLZF01000245.1	323	100	90.09	WP_114141887.1	scaffolds_C318	Escherichia coli (E. coli)		562	SAMEA4350787	PRJEB14873	academisch medisch centrum	2016-12-3	n/a	major	Scaffold	full		100x			GCA_900093865.1	GCF_900093865.1	yes
NZ_FLZF01000246.1	323	100	100		scaffolds_C318	Escherichia coli (E. coli)		562	SAMEA4350787	PRJEB14873	academisch medisch centrum	2016-12-3	n/a	major	Scaffold	full		100x			GCA_900093865.1	GCF_900093865.1	yes
NZ_FLZF01000247.1	320	100	100		scaffolds_C318	Escherichia coli (E. coli)		562	SAMEA4350787	PRJEB14873	academisch medisch centrum	2016-12-3	n/a	major	Scaffold	full		100x			GCA_900093865.1	GCF_900093865.1	yes
NZ_FLZF01000248.1	320	99.06	100		scaffolds_C318	Escherichia coli (E. coli)		562	SAMEA4350787	PRJEB14873	academisch medisch centrum	2016-12-3	n/a	major	Scaffold	full		100x			GCA_900093865.1	GCF_900093865.1	yes
NZ_FLZF01000249.1	319	99.37	100		scaffolds_C318	Escherichia coli (E. coli)		562	SAMEA4350787	PRJEB14873	academisch medisch centrum	2016-12-3	n/a	major	Scaffold	full		100x			GCA_900093865.1	GCF_900093865.1	yes
NZ_FLZF01000250.1	315	100	100		scaffolds_C318	Escherichia coli (E. coli)		562	SAMEA4350787	PRJEB14873	academisch medisch centrum	2016-12-3	n/a	major	Scaffold	full		100x			GCA_900093865.1	GCF_900093865.1	yes
NZ_FLZF01000251.1	315	100	100		scaffolds_C318	Escherichia coli (E. coli)		562	SAMEA4350787	PRJEB14873	academisch medisch centrum	2016-12-3	n/a	major	Scaffold	full		100x			GCA_900093865.1	GCF_900093865.1	yes
NZ_FLZF01000252.1	313	100	100		scaffolds_C318	Escherichia coli (E. coli)		562	SAMEA4350787	PRJEB14873	academisch medisch centrum	2016-12-3	n/a	major	Scaffold	full		100x			GCA_900093865.1	GCF_900093865.1	yes
NZ_FLZF01000253.1	313	100	100		scaffolds_C318	Escherichia coli (E. coli)		562	SAMEA4350787	PRJEB14873	academisch medisch centrum	2016-12-3	n/a	major	Scaffold	full		100x			GCA_900093865.1	GCF_900093865.1	yes
NZ_FLZF01000254.1	313	100	100		scaffolds_C318	Escherichia coli (E. coli)		562	SAMEA4350787	PRJEB14873	academisch medisch centrum	2016-12-3	n/a	major	Scaffold	full		100x			GCA_900093865.1	GCF_900093865.1	yes
NZ_FLZF01000255.1	311	100	100		scaffolds_C318	Escherichia coli (E. coli)		562	SAMEA4350787	PRJEB14873	academisch medisch centrum	2016-12-3	n/a	major	Scaffold	full		100x			GCA_900093865.1	GCF_900093865.1	yes
NZ_FLZF01000256.1	310	99.68	100		scaffolds_C318	Escherichia coli (E. coli)		562	SAMEA4350787	PRJEB14873	academisch medisch centrum	2016-12-3	n/a	major	Scaffold	full		100x			GCA_900093865.1	GCF_900093865.1	yes
NZ_FLZF01000257.1	307	100	100		scaffolds_C318	Escherichia coli (E. coli)		562	SAMEA4350787	PRJEB14873	academisch medisch centrum	2016-12-3	n/a	major	Scaffold	full		100x			GCA_900093865.1	GCF_900093865.1	yes
NZ_FLZF01000258.1	306	100	100		scaffolds_C318	Escherichia coli (E. coli)		562	SAMEA4350787	PRJEB14873	academisch medisch centrum	2016-12-3	n/a	major	Scaffold	full		100x			GCA_900093865.1	GCF_900093865.1	yes
NZ_FLZF01000259.1	306	100	100		scaffolds_C318	Escherichia coli (E. coli)		562	SAMEA4350787	PRJEB14873	academisch medisch centrum	2016-12-3	n/a	major	Scaffold	full		100x			GCA_900093865.1	GCF_900093865.1	yes
NZ_FLZF01000260.1	302	100	100		scaffolds_C318	Escherichia coli (E. coli)		562	SAMEA4350787	PRJEB14873	academisch medisch centrum	2016-12-3	n/a	major	Scaffold	full		100x			GCA_900093865.1	GCF_900093865.1	yes
NZ_FLZF01000261.1	302	96.69	100		scaffolds_C318	Escherichia coli (E. coli)		562	SAMEA4350787	PRJEB14873	academisch medisch centrum	2016-12-3	n/a	major	Scaffold	full		100x			GCA_900093865.1	GCF_900093865.1	yes
NZ_FLZF01000262.1	301	100	100		scaffolds_C318	Escherichia coli (E. coli)		562	SAMEA4350787	PRJEB14873	academisch medisch centrum	2016-12-3	n/a	major	Scaffold	full		100x			GCA_900093865.1	GCF_900093865.1	yes
NZ_FLZF01000263.1	298	100	100		scaffolds_C318	Escherichia coli (E. coli)		562	SAMEA4350787	PRJEB14873	academisch medisch centrum	2016-12-3	n/a	major	Scaffold	full		100x			GCA_900093865.1	GCF_900093865.1	yes
NZ_FLZF01000264.1	298	100	100		scaffolds_C318	Escherichia coli (E. coli)		562	SAMEA4350787	PRJEB14873	academisch medisch centrum	2016-12-3	n/a	major	Scaffold	full		100x			GCA_900093865.1	GCF_900093865.1	yes
NZ_FLZF01000265.1	297	100	100		scaffolds_C318	Escherichia coli (E. coli)		562	SAMEA4350787	PRJEB14873	academisch medisch centrum	2016-12-3	n/a	major	Scaffold	full		100x			GCA_900093865.1	GCF_900093865.1	yes
NZ_FLZF01000266.1	294	100	100		scaffolds_C318	Escherichia coli (E. coli)		562	SAMEA4350787	PRJEB14873	academisch medisch centrum	2016-12-3	n/a	major	Scaffold	full		100x			GCA_900093865.1	GCF_900093865.1	yes
NZ_FLZF01000267.1	294	100	100		scaffolds_C318	Escherichia coli (E. coli)		562	SAMEA4350787	PRJEB14873	academisch medisch centrum	2016-12-3	n/a	major	Scaffold	full		100x			GCA_900093865.1	GCF_900093865.1	yes
NZ_FLZF01000269.1	293	99.66	100		scaffolds_C318	Escherichia coli (E. coli)		562	SAMEA4350787	PRJEB14873	academisch medisch centrum	2016-12-3	n/a	major	Scaffold	full		100x			GCA_900093865.1	GCF_900093865.1	yes
NZ_FLZF01000270.1	291	99.66	100		scaffolds_C318	Escherichia coli (E. coli)		562	SAMEA4350787	PRJEB14873	academisch medisch centrum	2016-12-3	n/a	major	Scaffold	full		100x			GCA_900093865.1	GCF_900093865.1	yes
NZ_FLZF01000271.1	291	99.66	100		scaffolds_C318	Escherichia coli (E. coli)		562	SAMEA4350787	PRJEB14873	academisch medisch centrum	2016-12-3	n/a	major	Scaffold	full		100x			GCA_900093865.1	GCF_900093865.1	yes
NZ_FLZF01000272.1	290	100	100		scaffolds_C318	Escherichia coli (E. coli)		562	SAMEA4350787	PRJEB14873	academisch medisch centrum	2016-12-3	n/a	major	Scaffold	full		100x			GCA_900093865.1	GCF_900093865.1	yes
NZ_FLZF01000273.1	290	100	100		scaffolds_C318	Escherichia coli (E. coli)		562	SAMEA4350787	PRJEB14873	academisch medisch centrum	2016-12-3	n/a	major	Scaffold	full		100x			GCA_900093865.1	GCF_900093865.1	yes
NZ_FLZF01000274.1	289	100	100		scaffolds_C318	Escherichia coli (E. coli)		562	SAMEA4350787	PRJEB14873	academisch medisch centrum	2016-12-3	n/a	major	Scaffold	full		100x			GCA_900093865.1	GCF_900093865.1	yes
NZ_FLZF01000276.1	287	100	100		scaffolds_C318	Escherichia coli (E. coli)		562	SAMEA4350787	PRJEB14873	academisch medisch centrum	2016-12-3	n/a	major	Scaffold	full		100x			GCA_900093865.1	GCF_900093865.1	yes
NZ_FLZF01000277.1	287	99.65	100		scaffolds_C318	Escherichia coli (E. coli)		562	SAMEA4350787	PRJEB14873	academisch medisch centrum	2016-12-3	n/a	major	Scaffold	full		100x			GCA_900093865.1	GCF_900093865.1	yes
NZ_FLZF01000278.1	286	100	100		scaffolds_C318	Escherichia coli (E. coli)		562	SAMEA4350787	PRJEB14873	academisch medisch centrum	2016-12-3	n/a	major	Scaffold	full		100x			GCA_900093865.1	GCF_900093865.1	yes
NZ_FLZF01000279.1	285	99.65	100		scaffolds_C318	Escherichia coli (E. coli)		562	SAMEA4350787	PRJEB14873	academisch medisch centrum	2016-12-3	n/a	major	Scaffold	full		100x			GCA_900093865.1	GCF_900093865.1	yes
NZ_FLZF01000281.1	284	100	100		scaffolds_C318	Escherichia coli (E. coli)		562	SAMEA4350787	PRJEB14873	academisch medisch centrum	2016-12-3	n/a	major	Scaffold	full		100x			GCA_900093865.1	GCF_900093865.1	yes
NZ_FLZF01000282.1	282	100	100		scaffolds_C318	Escherichia coli (E. coli)		562	SAMEA4350787	PRJEB14873	academisch medisch centrum	2016-12-3	n/a	major	Scaffold	full		100x			GCA_900093865.1	GCF_900093865.1	yes
NZ_FLZF01000286.1	278	100	100		scaffolds_C318	Escherichia coli (E. coli)		562	SAMEA4350787	PRJEB14873	academisch medisch centrum	2016-12-3	n/a	major	Scaffold	full		100x			GCA_900093865.1	GCF_900093865.1	yes
NZ_FLZF01000287.1	278	100	100		scaffolds_C318	Escherichia coli (E. coli)		562	SAMEA4350787	PRJEB14873	academisch medisch centrum	2016-12-3	n/a	major	Scaffold	full		100x			GCA_900093865.1	GCF_900093865.1	yes
NZ_FLZF01000288.1	278	97.67	92.45		scaffolds_C318	Escherichia coli (E. coli)		562	SAMEA4350787	PRJEB14873	academisch medisch centrum	2016-12-3	n/a	major	Scaffold	full		100x			GCA_900093865.1	GCF_900093865.1	yes
NZ_FLZF01000290.1	276	100	100	WP_072842348.1	scaffolds_C318	Escherichia coli (E. coli)		562	SAMEA4350787	PRJEB14873	academisch medisch centrum	2016-12-3	n/a	major	Scaffold	full		100x			GCA_900093865.1	GCF_900093865.1	yes
NZ_FLZF01000291.1	275	100	100		scaffolds_C318	Escherichia coli (E. coli)		562	SAMEA4350787	PRJEB14873	academisch medisch centrum	2016-12-3	n/a	major	Scaffold	full		100x			GCA_900093865.1	GCF_900093865.1	yes
NZ_FLZF01000292.1	275	100	100		scaffolds_C318	Escherichia coli (E. coli)		562	SAMEA4350787	PRJEB14873	academisch medisch centrum	2016-12-3	n/a	major	Scaffold	full		100x			GCA_900093865.1	GCF_900093865.1	yes
NZ_FLZF01000294.1	273	100	100		scaffolds_C318	Escherichia coli (E. coli)		562	SAMEA4350787	PRJEB14873	academisch medisch centrum	2016-12-3	n/a	major	Scaffold	full		100x			GCA_900093865.1	GCF_900093865.1	yes
NZ_FLZF01000298.1	273	100	100		scaffolds_C318	Escherichia coli (E. coli)		562	SAMEA4350787	PRJEB14873	academisch medisch centrum	2016-12-3	n/a	major	Scaffold	full		100x			GCA_900093865.1	GCF_900093865.1	yes
NZ_FLZF01000300.1	272	100	100		scaffolds_C318	Escherichia coli (E. coli)		562	SAMEA4350787	PRJEB14873	academisch medisch centrum	2016-12-3	n/a	major	Scaffold	full		100x			GCA_900093865.1	GCF_900093865.1	yes
NZ_FLZF01000301.1	272	100	98.53		scaffolds_C318	Escherichia coli (E. coli)		562	SAMEA4350787	PRJEB14873	academisch medisch centrum	2016-12-3	n/a	major	Scaffold	full		100x			GCA_900093865.1	GCF_900093865.1	yes
NZ_FLZF01000302.1	272	100	100		scaffolds_C318	Escherichia coli (E. coli)		562	SAMEA4350787	PRJEB14873	academisch medisch centrum	2016-12-3	n/a	major	Scaffold	full		100x			GCA_900093865.1	GCF_900093865.1	yes
NZ_FLZF01000303.1	271	100	100		scaffolds_C318	Escherichia coli (E. coli)		562	SAMEA4350787	PRJEB14873	academisch medisch centrum	2016-12-3	n/a	major	Scaffold	full		100x			GCA_900093865.1	GCF_900093865.1	yes
NZ_FLZF01000304.1	271	100	100		scaffolds_C318	Escherichia coli (E. coli)		562	SAMEA4350787	PRJEB14873	academisch medisch centrum	2016-12-3	n/a	major	Scaffold	full		100x			GCA_900093865.1	GCF_900093865.1	yes
NZ_FLZF01000306.1	270	100	100		scaffolds_C318	Escherichia coli (E. coli)		562	SAMEA4350787	PRJEB14873	academisch medisch centrum	2016-12-3	n/a	major	Scaffold	full		100x			GCA_900093865.1	GCF_900093865.1	yes
NZ_FLZF01000307.1	270	100	100		scaffolds_C318	Escherichia coli (E. coli)		562	SAMEA4350787	PRJEB14873	academisch medisch centrum	2016-12-3	n/a	major	Scaffold	full		100x			GCA_900093865.1	GCF_900093865.1	yes
NZ_FLZF01000308.1	270	99.63	100		scaffolds_C318	Escherichia coli (E. coli)		562	SAMEA4350787	PRJEB14873	academisch medisch centrum	2016-12-3	n/a	major	Scaffold	full		100x			GCA_900093865.1	GCF_900093865.1	yes
NZ_FLZF01000309.1	270	100	100		scaffolds_C318	Escherichia coli (E. coli)		562	SAMEA4350787	PRJEB14873	academisch medisch centrum	2016-12-3	n/a	major	Scaffold	full		100x			GCA_900093865.1	GCF_900093865.1	yes
NZ_FLZF01000311.1	269	100	100		scaffolds_C318	Escherichia coli (E. coli)		562	SAMEA4350787	PRJEB14873	academisch medisch centrum	2016-12-3	n/a	major	Scaffold	full		100x			GCA_900093865.1	GCF_900093865.1	yes
NZ_FLZF01000312.1	269	100	100		scaffolds_C318	Escherichia coli (E. coli)		562	SAMEA4350787	PRJEB14873	academisch medisch centrum	2016-12-3	n/a	major	Scaffold	full		100x			GCA_900093865.1	GCF_900093865.1	yes
NZ_FLZF01000313.1	269	100	100		scaffolds_C318	Escherichia coli (E. coli)		562	SAMEA4350787	PRJEB14873	academisch medisch centrum	2016-12-3	n/a	major	Scaffold	full		100x			GCA_900093865.1	GCF_900093865.1	yes
NZ_FLZF01000315.1	267	100	100		scaffolds_C318	Escherichia coli (E. coli)		562	SAMEA4350787	PRJEB14873	academisch medisch centrum	2016-12-3	n/a	major	Scaffold	full		100x			GCA_900093865.1	GCF_900093865.1	yes
NZ_FLZF01000316.1	267	100	100		scaffolds_C318	Escherichia coli (E. coli)		562	SAMEA4350787	PRJEB14873	academisch medisch centrum	2016-12-3	n/a	major	Scaffold	full		100x			GCA_900093865.1	GCF_900093865.1	yes
NZ_FLZF01000318.1	266	99.25	100		scaffolds_C318	Escherichia coli (E. coli)		562	SAMEA4350787	PRJEB14873	academisch medisch centrum	2016-12-3	n/a	major	Scaffold	full		100x			GCA_900093865.1	GCF_900093865.1	yes
NZ_FLZF01000319.1	265	100	100		scaffolds_C318	Escherichia coli (E. coli)		562	SAMEA4350787	PRJEB14873	academisch medisch centrum	2016-12-3	n/a	major	Scaffold	full		100x			GCA_900093865.1	GCF_900093865.1	yes
NZ_FLZF01000320.1	265	100	100		scaffolds_C318	Escherichia coli (E. coli)		562	SAMEA4350787	PRJEB14873	academisch medisch centrum	2016-12-3	n/a	major	Scaffold	full		100x			GCA_900093865.1	GCF_900093865.1	yes
NZ_FLZF01000321.1	264	99.62	100		scaffolds_C318	Escherichia coli (E. coli)		562	SAMEA4350787	PRJEB14873	academisch medisch centrum	2016-12-3	n/a	major	Scaffold	full		100x			GCA_900093865.1	GCF_900093865.1	yes
NZ_FLZF01000322.1	263	100	100		scaffolds_C318	Escherichia coli (E. coli)		562	SAMEA4350787	PRJEB14873	academisch medisch centrum	2016-12-3	n/a	major	Scaffold	full		100x			GCA_900093865.1	GCF_900093865.1	yes
NZ_FLZF01000323.1	263	99.62	100		scaffolds_C318	Escherichia coli (E. coli)		562	SAMEA4350787	PRJEB14873	academisch medisch centrum	2016-12-3	n/a	major	Scaffold	full		100x			GCA_900093865.1	GCF_900093865.1	yes
NZ_FLZF01000324.1	263	100	100	WP_114141889.1	scaffolds_C318	Escherichia coli (E. coli)		562	SAMEA4350787	PRJEB14873	academisch medisch centrum	2016-12-3	n/a	major	Scaffold	full		100x			GCA_900093865.1	GCF_900093865.1	yes
NZ_FLZF01000325.1	262	100	100		scaffolds_C318	Escherichia coli (E. coli)		562	SAMEA4350787	PRJEB14873	academisch medisch centrum	2016-12-3	n/a	major	Scaffold	full		100x			GCA_900093865.1	GCF_900093865.1	yes
NZ_FLZF01000326.1	262	99.24	100		scaffolds_C318	Escherichia coli (E. coli)		562	SAMEA4350787	PRJEB14873	academisch medisch centrum	2016-12-3	n/a	major	Scaffold	full		100x			GCA_900093865.1	GCF_900093865.1	yes
NZ_FLZF01000328.1	260	100	100		scaffolds_C318	Escherichia coli (E. coli)		562	SAMEA4350787	PRJEB14873	academisch medisch centrum	2016-12-3	n/a	major	Scaffold	full		100x			GCA_900093865.1	GCF_900093865.1	yes
NZ_FLZF01000330.1	260	100	100		scaffolds_C318	Escherichia coli (E. coli)		562	SAMEA4350787	PRJEB14873	academisch medisch centrum	2016-12-3	n/a	major	Scaffold	full		100x			GCA_900093865.1	GCF_900093865.1	yes
NZ_FLZF01000331.1	259	100	100		scaffolds_C318	Escherichia coli (E. coli)		562	SAMEA4350787	PRJEB14873	academisch medisch centrum	2016-12-3	n/a	major	Scaffold	full		100x			GCA_900093865.1	GCF_900093865.1	yes
NZ_FLZF01000333.1	259	100	100		scaffolds_C318	Escherichia coli (E. coli)		562	SAMEA4350787	PRJEB14873	academisch medisch centrum	2016-12-3	n/a	major	Scaffold	full		100x			GCA_900093865.1	GCF_900093865.1	yes
[truncated: 3,710 more rows]

## Sheet: README
	Supplemental Table S2: Results of human genome searches against bacterial and archaeal genomes
[truncated: 25 more rows]
