# Supplementary material for: Human contamination in bacterial genomes has created thousands of spurious proteins
Source: HighWire-hosted journal article supplement (doi:10.1101/gr.245373.118), 2019-05-07
Supplement: Supplemental_Table_S4.xlsx [file Supplemental_Table_S4.xlsx]

## Sheet: Sheet 1
RefSeqAssemblyAccession	OrganismName	SequenceAccession	SequenceLen	ContigLen	DistanceToN	MatchedSeq	ContaminationSource	AssemblyLevel	SequencingTechnology	AssemblyMethod	AssemblyLevel.1	Date	BioSample	SRA
GCF_000825925.1	Ralstonia solanacearum (b-proteobacteria)	NZ_CDLX01000001.1	5744274	102	0	2782-2886;5735029-5735138	Alu,Sat	Scaffold			Scaffold	2015-1-6	SAMEA3137588	ERS609445 (not accessible)
GCF_000825845.1	Ralstonia solanacearum (b-proteobacteria)	NZ_CDLW01000001.1	5479463	937	0	5416642-5416772	Alu	Scaffold			Scaffold	2015-1-6	SAMEA3137596	ERS609455 (not accessible)
GCF_000161355.1	Bacillus cereus AH676 (firmicutes)	NZ_CM000738.1	5594747	14627	0	5307534-5307718	Alu	Chromosome	454 GS FLX Titanium		Chromosome	2009-5-29	SAMN00727673	SRS265360
GCF_000156435.1	Streptomyces viridosporus ATCC 14672 (high GC Gram+)	NZ_DS999641.1	8265412	59144	0	5475304-5475517	LINE	Scaffold			Scaffold	2009-1-27	SAMN02595233
GCF_001584095.1	Bacillus cereus (firmicutes)	NZ_LONH01000293.1	106210	106210	0	106122-106210	Alu,DNATransposon,HSATII,HumanGenome,LINE,LTR,Sat	Contig	Illumina MiSeq	SPAdes v. 3.0.0	Contig	2016-3-9	SAMN03800030	SRS1095654
GCF_000156475.1	Streptomyces albidoflavus (high GC Gram+)	NZ_DS999645.1	6813830	15396	78	1679195-1679453	Alu	Scaffold			Scaffold	2009-1-27	SAMN02595235
GCF_001046855.1	Tetrasphaera japonica T1-X7 (high GC Gram+)	NZ_HF570958.1	5162321	1024	112	4830489-4830808	Alu	Scaffold			Scaffold	2014-7-25	SAMEA3146271	ERS617227 (not accessible)
GCF_900087875.1	Neisseria gonorrhoeae (b-proteobacteria)	NZ_FLLA01000002.1	134169	134169	655	132793-133514	LINE	Contig	PacBio		Contig	2016-9-16	SAMEA2448463	ERS433507
GCF_000695855.3	Acinetobacter baumannii (g-proteobacteria)	NZ_CP007535.2	3851648	3851648	1109	3843700-3844581;3848571-3848984;3849650-3850539	DNATransposon	Complete Genome	Illumina	CLCBio Genomic Workbench v. 5.0	Complete Genome	2015-4-6	SAMN02714232
GCF_002214325.1	Exiguobacterium oxidotolerans (firmicutes)	NZ_CP022236.1	3032448	17094	1987	3030172-3030461	LINE	Chromosome	Illumina MiSeq	SPAdes v. 3.10.1	Chromosome	2017-7-3	SAMN04537352
GCF_003056725.1	Mangrovicoccus ximenensis (a-proteobacteria)	NZ_QBKZ01000003.1	124614	51060	2771	91800-91930;109542-109677	Alu,HSATII,LTR	Contig	Illumina HiSeq	Velvet v. 2.3	Contig	2018-4-18	SAMN08730605
GCF_003428945.1	Pasteurella multocida subsp. multocida (g-proteobacteria)	NZ_CP014157.1	2386620	111990	6119	2272573-2272816;2272926-2273216;2273309-2273451;2273453-2273702;2280750-2280937;2283528-2283695;2283696-2283800;2284020-2284203;2288138-2288351;2303222-2303489;2306824-2307085;2316002-2316192;2350345-2350444;2371424-2371611;2371921-2372091;2372121-2372296;2373523-2373749;2378392-2378530	Alu,LINE,LTR,Sat	Chromosome	Illumina HiSeq	Velvet v. 1.2.09	Chromosome	2018-8-27	SAMN04195477
GCF_900050915.1	Enterobacter cloacae (enterobacteria)	NZ_LT160614.1	5159348	950148	7659	4171473-4172269;4792783-4793095	Alu,LINE	Chromosome			Chromosome	2016-2-19	SAMEA3856670	ERS1043804 (not accessible)
GCF_002407105.1	Staphylococcus aureus (firmicutes)	NZ_CP023560.1	3124697	111858	11466	3101338-3101645;3107610-3107777;3107783-3107948;3109873-3110124;3112477-3112640;3112641-3112737;3112971-3113231	Alu,LINE,Sat	Chromosome	Illumina; Oxford Nanopore	SPAdes v. 3.10.1	Chromosome	2017-10-2	SAMN04621062
GCF_003285265.1	Paracoccus mutanolyticus (a-proteobacteria)	NZ_CP030239.1	3592357	3008043	16756	2991199-2991287	Alu	Complete Genome	Illumina NextSeq 500	CLC denovo v. 9.0.1	Complete Genome	2018-7-2	SAMN09453177	SRS3704233
GCF_001746535.1	Klebsiella pneumoniae subsp. pneumoniae (enterobacteria)	NZ_CP012745.1	5344576	5344576	16949	5327303-5327627	Alu	Complete Genome	Illumina	SPAdes v. 3.1	Complete Genome	2016-9-26	SAMN04087463
GCF_003056725.1	Mangrovicoccus ximenensis (a-proteobacteria)	NZ_QBKZ01000001.1	1157771	122912	30354	47238-47484	Alu,HSATII,LTR	Contig	Illumina HiSeq	Velvet v. 2.3	Contig	2018-4-18	SAMN08730605
GCF_001611095.1	Klebsiella pneumoniae subsp. pneumoniae (enterobacteria)	NZ_CP012744.1	5355459	5355459	65817	65818-66184;68421-68667	Alu,LINE	Complete Genome	Illumina	SPAdes v. 3.1	Complete Genome	2016-4-5	SAMN04087462
GCF_001047255.1	Neisseria gonorrhoeae (b-proteobacteria)	NZ_CP012027.1	2168698	2168698	692577	692578-693299	LINE	Complete Genome	PacBio	Prokka v. 1.11	Complete Genome	2015-7-7	SAMN03459416
GCF_900454065.1	Neisseria gonorrhoeae (b-proteobacteria)	NZ_UGRJ01000003.1	2163390	2163390	1032090	1130579-1131300	LINE	Contig	PacBio		Contig	2018-8-1	SAMEA3174299	ERS627822

## Sheet: README
	Supplemental Table S4: Longest bacterial scaffolds (> 100 kbp) that match one or more human repeats
	Columns name	Example	Description
1	RefSeqAssemblyAccession	GCF_001584095.1	RefSeq Assembly AC
2	OrganismName	Bacillus cereus (firmicutes)	Organism name
3	SequenceAccession	NZ_LONH01000293.1	AC of contamianted sequence
4	SequenceLen	106210	Length of contaminated sequence
5	ContigLen	106210	Length of contamianted contig. A contig here is defined as any part in the sequence delimited by one or more N's
6	DistanceToN	0	Distance of contaminated stretch to closest N (i.e., beginning or start of 'contig')
7	MatchedSeq	106122-106210	Contaminated stretch
8	ContaminationSource	Alu,DNATransposon,HSATII,HumanGenome,LINE,LTR,Sat	HMM profile(s) that matched the sequence
9	AssemblyLevel	Contig	Assembly level of genome
10	SequencingTechnology	Illumina MiSeq	Assembly sequencing technology
11	AssemblyMethod	SPAdes v. 3.0.0	Assembly software
12	AssemblyLevel.1	Contig	Assembly level of genome
13	Date	2016-3-9	Assembly date
14	BioSample	SAMN03800030	Assembly BioSample AC
15	SRA	SRS1095654	SRA entry linked to BioSample
