# Supplementary material for: Human contamination in bacterial genomes has created thousands of spurious proteins
Source: HighWire-hosted journal article supplement (doi:10.1101/gr.245373.118), 2019-05-07
Supplement: Supplemental_Table_S5.xlsx [file Supplemental_Table_S5.xlsx]

## Sheet: Sheet1
qseqid	sseqid	pident	length	mismatch	gapopen	qstart	qend	sstart	send	evalue	bitscore	ProteinAC	ProteinTitle	ProteinLen	ProteinStatus	ProteinTaxId	ProteinCreateDate	ProteinUpdateDate	ProteinComment	ProteinOrg	ProteinKingdom	nCDS	CDS	NucleotideId	NucleotideTitle	NucleotideLen	Profile	Database	Domain	Lineage
NZ_LZSE01000010.1:1742-5035	gi|1114009257|ref|WP_072035609.1|	100	213	0	0	1	639	1	213	7e-118	434.9	WP_072035609.1	hypothetical protein, partial [Enterobacter hormaechei]	213	suppressed	158836	2016-12-10	2016-12-10	This protein record was suppressed because it is no longer annotated on any genome	REMOVED	NA	NA	NA	NA	NA	NA	L1P1_orf2	nr	bacteria	|-__root|-__cellular_organisms|k__Bacteria|p__Proteobacteria|c__Gammaproteobacteria|o__Enterobacterales|f__Enterobacteriaceae|g__Enterobacter|-__Enterobacter_cloacae_complex|s__Enterobacter_hormaechei
NZ_JPWZ01000242.1:124-287	gi|1143202201|ref|WP_077128843.1|	100	54	0	0	1	162	22	75	9e-24	117.1	WP_077128843.1	hypothetical protein [Shigella sonnei]	81	suppressed	624	2017-02-08	2017-02-08	This protein record was suppressed because it is no longer annotated on any genome	REMOVED	NA	NA	NA	NA	NA	NA	HSATII	nr	bacteria	|-__root|-__cellular_organisms|k__Bacteria|p__Proteobacteria|c__Gammaproteobacteria|o__Enterobacterales|f__Enterobacteriaceae|g__Shigella|s__Shigella_sonnei
NZ_FTZV01000265.1:1077-1247	gi|1143202206|ref|WP_077128848.1|	100	57	0	0	171	1	13	69	1e-24	119.8	WP_077128848.1	hypothetical protein [Shigella sonnei]	83	suppressed	624	2017-02-08	2017-02-08	This protein record was suppressed because it is no longer annotated on any genome	REMOVED	NA	NA	NA	NA	NA	NA	ALR	nr	bacteria	|-__root|-__cellular_organisms|k__Bacteria|p__Proteobacteria|c__Gammaproteobacteria|o__Enterobacterales|f__Enterobacteriaceae|g__Shigella|s__Shigella_sonnei
NZ_QLYT01000039.1:340-510	gi|1143202210|ref|WP_077128852.1|	100	57	0	0	1	171	22	78	2e-24	119	WP_077128852.1	hypothetical protein [Shigella sonnei]	99	suppressed	624	2017-02-08	2017-02-08	This protein record was suppressed because it is no longer annotated on any genome	REMOVED	NA	NA	NA	NA	NA	NA	ALR	nr	bacteria	|-__root|-__cellular_organisms|k__Bacteria|p__Proteobacteria|c__Gammaproteobacteria|o__Enterobacterales|f__Enterobacteriaceae|g__Shigella|s__Shigella_sonnei
NZ_PYPV01000107.1:1284-1454	gi|1143202211|ref|WP_077128853.1|	100	40	0	0	171	52	23	62	7e-16	90.9	WP_077128853.1	hypothetical protein [Shigella sonnei]	62	suppressed	624	2017-02-08	2017-02-08	This protein record was suppressed because it is no longer annotated on any genome	REMOVED	NA	NA	NA	NA	NA	NA	ALR	nr	bacteria	|-__root|-__cellular_organisms|k__Bacteria|p__Proteobacteria|c__Gammaproteobacteria|o__Enterobacterales|f__Enterobacteriaceae|g__Shigella|s__Shigella_sonnei
NZ_FTZV01000410.1:3-201	gi|1143202225|ref|WP_077128867.1|	100	48	0	0	197	54	113	160	3e-18	99	WP_077128867.1	hypothetical protein [Shigella sonnei]	160	suppressed	624	2017-02-08	2018-01-11	This protein record was suppressed because it is no longer annotated on any genome	REMOVED	NA	NA	NA	NA	NA	NA	AluJo	nr	bacteria	|-__root|-__cellular_organisms|k__Bacteria|p__Proteobacteria|c__Gammaproteobacteria|o__Enterobacterales|f__Enterobacteriaceae|g__Shigella|s__Shigella_sonnei
NZ_FRWP01000042.1:1-645	gi|1279676564|ref|WP_100226836.1|	99.36	157	1	0	136	606	1	157	4e-92	345.5	WP_100226836.1	DUF1725 domain-containing protein [Microbacterium laevaniformans]	157	suppressed	36807	2017-11-23	2017-12-06	This protein record was suppressed because it is no longer annotated on any genome	REMOVED	NA	NA	NA	NA	NA	NA	L1HS_3end	nr	bacteria	|-__root|-__cellular_organisms|k__Bacteria|-__Terrabacteria_group|p__Actinobacteria|c__Actinobacteria|o__Micrococcales|f__Microbacteriaceae|g__Microbacterium|s__Microbacterium_laevaniformans
NZ_JYDX01000100.1:2647-3251	gi|1349016079|gb|PPV24016.1|	98.18	55	1	0	187	23	79	133	1e-23	117.5	PPV24016.1	hypothetical protein AWN80_18665 [Clostridioides difficile]	133	live	1496	2018-02-24	2018-02-24		REMOVED	NA	NA	NA	NA	NA	NA	L1HS_3end	nr	bacteria	|-__root|-__cellular_organisms|k__Bacteria|-__Terrabacteria_group|p__Firmicutes|c__Clostridia|o__Clostridiales|f__Peptostreptococcaceae|g__Clostridioides|s__Clostridioides_difficile
NZ_LRDM01000041.1:134-664	gi|1349026068|gb|PPV32980.1|	100	86	0	0	412	155	1	86	7e-46	191	PPV32980.1	hypothetical protein AWN77_20380 [Clostridioides difficile]	86	live	1496	2018-02-24	2018-02-24		REMOVED	NA	NA	NA	NA	NA	NA	L1HS_3end	nr	bacteria	|-__root|-__cellular_organisms|k__Bacteria|-__Terrabacteria_group|p__Firmicutes|c__Clostridia|o__Clostridiales|f__Peptostreptococcaceae|g__Clostridioides|s__Clostridioides_difficile
NZ_QLCK01000126.1:1-272	gi|1406786652|gb|RAF54035.1|	98.39	62	1	0	86	271	1	62	7e-28	131	RAF54035.1	hypothetical protein DN525_31145, partial [Burkholderia multivorans]	62	live	87883	2018-06-19	2018-06-19		REMOVED	NA	NA	NA	NA	NA	NA	L1P1_orf2	nr	bacteria	|-__root|-__cellular_organisms|k__Bacteria|p__Proteobacteria|c__Betaproteobacteria|o__Burkholderiales|f__Burkholderiaceae|g__Burkholderia|-__Burkholderia_cepacia_complex|s__Burkholderia_multivorans
NZ_QLBZ01000131.1:1-243	gi|1406795575|gb|RAF62412.1|	100	80	0	0	241	2	1	80	3e-43	181.8	RAF62412.1	hypothetical protein DN538_31110, partial [Burkholderia multivorans]	80	live	87883	2018-06-19	2018-06-19		REMOVED	NA	NA	NA	NA	NA	NA	L1HS_3end	nr	bacteria	|-__root|-__cellular_organisms|k__Bacteria|p__Proteobacteria|c__Betaproteobacteria|o__Burkholderiales|f__Burkholderiaceae|g__Burkholderia|-__Burkholderia_cepacia_complex|s__Burkholderia_multivorans
NZ_QLBZ01000129.1:1-332	gi|1406795582|gb|RAF62415.1|	100	110	0	0	2	331	1	110	8e-58	230.3	RAF62415.1	hypothetical protein DN538_31100, partial [Burkholderia multivorans]	110	live	87883	2018-06-19	2018-06-19		REMOVED	NA	NA	NA	NA	NA	NA	L1P1_orf2	nr	bacteria	|-__root|-__cellular_organisms|k__Bacteria|p__Proteobacteria|c__Betaproteobacteria|o__Burkholderiales|f__Burkholderiaceae|g__Burkholderia|-__Burkholderia_cepacia_complex|s__Burkholderia_multivorans
NZ_QLBE01000146.1:1-270	gi|1406797970|gb|RAF64557.1|	100	89	0	0	2	268	1	89	4e-43	181.4	RAF64557.1	hypothetical protein DN552_31130, partial [Burkholderia multivorans]	89	live	87883	2018-06-19	2018-06-19		REMOVED	NA	NA	NA	NA	NA	NA	L1P1_orf2	nr	bacteria	|-__root|-__cellular_organisms|k__Bacteria|p__Proteobacteria|c__Betaproteobacteria|o__Burkholderiales|f__Burkholderiaceae|g__Burkholderia|-__Burkholderia_cepacia_complex|s__Burkholderia_multivorans
NZ_QRBT01000121.1:1-481	gi|1406809198|gb|RAF75159.1|	100	115	0	0	24	368	1	115	6e-58	231.1	RAF75159.1	endonuclease, partial [Burkholderia multivorans]	115	live	87883	2018-06-19	2018-06-19		REMOVED	NA	NA	NA	NA	NA	NA	L1P1_orf2	nr	bacteria	|-__root|-__cellular_organisms|k__Bacteria|p__Proteobacteria|c__Betaproteobacteria|o__Burkholderiales|f__Burkholderiaceae|g__Burkholderia|-__Burkholderia_cepacia_complex|s__Burkholderia_multivorans
NZ_QLBA01000193.1:1-402	gi|1406810519|gb|RAF76401.1|	100	134	0	0	1	402	1	134	2e-72	279.3	RAF76401.1	endonuclease, partial [Burkholderia multivorans]	134	live	87883	2018-06-19	2018-06-19		REMOVED	NA	NA	NA	NA	NA	NA	L1P1_orf2	nr	bacteria	|-__root|-__cellular_organisms|k__Bacteria|p__Proteobacteria|c__Betaproteobacteria|o__Burkholderiales|f__Burkholderiaceae|g__Burkholderia|-__Burkholderia_cepacia_complex|s__Burkholderia_multivorans
NZ_QLCN01000196.1:1-1034	gi|1406810550|gb|RAF76415.1|	100	344	0	0	1033	2	1	344	2e-196	693.3	RAF76415.1	endonuclease, partial [Burkholderia multivorans]	344	live	87883	2018-06-19	2018-06-19		REMOVED	NA	NA	NA	NA	NA	NA	L1P1_orf2	nr	bacteria	|-__root|-__cellular_organisms|k__Bacteria|p__Proteobacteria|c__Betaproteobacteria|o__Burkholderiales|f__Burkholderiaceae|g__Burkholderia|-__Burkholderia_cepacia_complex|s__Burkholderia_multivorans
NZ_QLBD01000119.1:1-283	gi|1406830282|gb|RAF95434.1|	100	92	0	0	3	278	1	92	9e-43	180.3	RAF95434.1	hypothetical protein DN577_31110, partial [Burkholderia multivorans]	92	live	87883	2018-06-19	2018-06-19		REMOVED	NA	NA	NA	NA	NA	NA	L1P1_orf2	nr	bacteria	|-__root|-__cellular_organisms|k__Bacteria|p__Proteobacteria|c__Betaproteobacteria|o__Burkholderiales|f__Burkholderiaceae|g__Burkholderia|-__Burkholderia_cepacia_complex|s__Burkholderia_multivorans
NZ_QLBS01000090.1:1-402	gi|1406843995|gb|RAG08945.1|	100	134	0	0	1	402	1	134	4e-70	271.2	RAG08945.1	endonuclease, partial [Burkholderia multivorans]	134	live	87883	2018-06-19	2018-06-19		REMOVED	NA	NA	NA	NA	NA	NA	L1P1_orf2	nr	bacteria	|-__root|-__cellular_organisms|k__Bacteria|p__Proteobacteria|c__Betaproteobacteria|o__Burkholderiales|f__Burkholderiaceae|g__Burkholderia|-__Burkholderia_cepacia_complex|s__Burkholderia_multivorans
NZ_QLAM01000161.1:1-251	gi|1406847525|gb|RAG12402.1|	100	83	0	0	251	3	1	83	5e-39	167.9	RAG12402.1	hypothetical protein DN579_31175, partial [Burkholderia multivorans]	83	live	87883	2018-06-19	2018-06-19		REMOVED	NA	NA	NA	NA	NA	NA	L1P1_orf2	nr	bacteria	|-__root|-__cellular_organisms|k__Bacteria|p__Proteobacteria|c__Betaproteobacteria|o__Burkholderiales|f__Burkholderiaceae|g__Burkholderia|-__Burkholderia_cepacia_complex|s__Burkholderia_multivorans
NZ_QLAM01000156.1:1-346	gi|1406847596|gb|RAG12467.1|	100	73	0	0	128	346	1	73	2e-39	169.5	RAG12467.1	hypothetical protein DN579_31160, partial [Burkholderia multivorans]	73	live	87883	2018-06-19	2018-06-19		REMOVED	NA	NA	NA	NA	NA	NA	L1HS_3end	nr	bacteria	|-__root|-__cellular_organisms|k__Bacteria|p__Proteobacteria|c__Betaproteobacteria|o__Burkholderiales|f__Burkholderiaceae|g__Burkholderia|-__Burkholderia_cepacia_complex|s__Burkholderia_multivorans
NZ_QLAY01000200.1:1-354	gi|1406847740|gb|RAG12581.1|	100	118	0	0	354	1	1	118	4e-62	244.6	RAG12581.1	endonuclease, partial [Burkholderia multivorans]	118	live	87883	2018-06-19	2018-06-19		REMOVED	NA	NA	NA	NA	NA	NA	L1P1_orf2	nr	bacteria	|-__root|-__cellular_organisms|k__Bacteria|p__Proteobacteria|c__Betaproteobacteria|o__Burkholderiales|f__Burkholderiaceae|g__Burkholderia|-__Burkholderia_cepacia_complex|s__Burkholderia_multivorans
NZ_QLAX01000152.1:1-281	gi|1406883814|gb|RAG47437.1|	100	93	0	0	279	1	6	98	3e-53	214.9	RAG47437.1	hypothetical protein DN559_31150, partial [Burkholderia multivorans]	98	live	87883	2018-06-19	2018-06-19		REMOVED	NA	NA	NA	NA	NA	NA	L1HS_3end	nr	bacteria	|-__root|-__cellular_organisms|k__Bacteria|p__Proteobacteria|c__Betaproteobacteria|o__Burkholderiales|f__Burkholderiaceae|g__Burkholderia|-__Burkholderia_cepacia_complex|s__Burkholderia_multivorans
NZ_QLDO01000234.1:1-503	gi|1406897175|gb|RAG59948.1|	100	167	0	0	1	501	1	167	2e-89	335.5	RAG59948.1	endonuclease, partial [Burkholderia multivorans]	168	live	87883	2018-06-19	2018-06-19		REMOVED	NA	NA	NA	NA	NA	NA	L1P1_orf2	nr	bacteria	|-__root|-__cellular_organisms|k__Bacteria|p__Proteobacteria|c__Betaproteobacteria|o__Burkholderiales|f__Burkholderiaceae|g__Burkholderia|-__Burkholderia_cepacia_complex|s__Burkholderia_multivorans
NZ_QLBD01000121.1:1-218	gi|1408012861|ref|WP_111452896.1|	100	60	0	0	204	25	1	60	3e-27	128.6	WP_111452896.1	DUF1725 domain-containing protein [Burkholderia multivorans]	60	live	87883	2018-06-22	2018-06-28		Burkholderia multivorans	Bacteria	0	NA	NA	NA	NA	L1HS_3end	nr	bacteria	|-__root|-__cellular_organisms|k__Bacteria|p__Proteobacteria|c__Betaproteobacteria|o__Burkholderiales|f__Burkholderiaceae|g__Burkholderia|-__Burkholderia_cepacia_complex|s__Burkholderia_multivorans
NZ_QLBE01000143.1:1-343	gi|1408064103|ref|WP_111474822.1|	100	80	0	0	42	281	1	80	5e-40	171.4	WP_111474822.1	DUF1725 domain-containing protein [Burkholderia multivorans]	80	live	87883	2018-06-22	2018-06-28		Burkholderia multivorans	Bacteria	0	NA	NA	NA	NA	L1HS_3end	nr	bacteria	|-__root|-__cellular_organisms|k__Bacteria|p__Proteobacteria|c__Betaproteobacteria|o__Burkholderiales|f__Burkholderiaceae|g__Burkholderia|-__Burkholderia_cepacia_complex|s__Burkholderia_multivorans
NZ_QLAJ01000128.1:112-282	gi|1408067288|ref|WP_111475071.1|	97.62	42	1	0	46	171	1	42	4e-18	98.2	WP_111475071.1	hypothetical protein [Burkholderia multivorans]	63	live	87883	2018-06-22	2018-06-22		REMOVED	NA	NA	NA	NA	NA	NA	ALR	nr	bacteria	|-__root|-__cellular_organisms|k__Bacteria|p__Proteobacteria|c__Betaproteobacteria|o__Burkholderiales|f__Burkholderiaceae|g__Burkholderia|-__Burkholderia_cepacia_complex|s__Burkholderia_multivorans
NZ_QMCW01000329.1:1-311	gi|1418675310|gb|RAY43292.1|	100	103	0	0	311	3	1	103	1e-52	213	RAY43292.1	hypothetical protein DP200_26005, partial [Enterobacter hormaechei subsp. oharae]	103	live	301102	2018-07-06	2018-07-06		REMOVED	NA	NA	NA	NA	NA	NA	L1P1_orf2	nr	bacteria	|-__root|-__cellular_organisms|k__Bacteria|p__Proteobacteria|c__Gammaproteobacteria|o__Enterobacterales|f__Enterobacteriaceae|g__Enterobacter|-__Enterobacter_cloacae_complex|s__Enterobacter_hormaechei|-__Enterobacter_hormaechei_subsp._oharae
NZ_LEKB01000127.1:1-526	gi|959241373|embl|CUV48234.1|	98.33	60	1	0	210	31	1	60	2e-26	126.7	CUV48234.1	protein of unknown function [Ralstonia solanacearum]	60	live	305	2015-12-04	2015-12-05		Ralstonia solanacearum	Bacteria	1	LN899827.1:5523491-5523673	LN899827.1	Ralstonia solanacearum genome assembly 9 genomes, chromosome : IX	5566589	L1HS_3end	nr	bacteria	|-__root|-__cellular_organisms|k__Bacteria|p__Proteobacteria|c__Betaproteobacteria|o__Burkholderiales|f__Burkholderiaceae|g__Ralstonia|s__Ralstonia_solanacearum
NZ_LT160614.1:4171473-4172269	gi|1105230302|ref|WP_071830102.1|	100	40	0	0	533	652	1	40	1e-14	88.6	WP_071830102.1	hypothetical protein [Enterobacter cloacae]	40	live	550	2016-11-25	2016-11-25		Enterobacter cloacae	Bacteria	1	NZ_LT160614.1:4172005-4172127	NZ_LT160614.1	Enterobacter cloacae strain NH52 chromosome I, whole genome shotgun sequence	5159348	L1HS_5end	nr	bacteria	|-__root|-__cellular_organisms|k__Bacteria|p__Proteobacteria|c__Gammaproteobacteria|o__Enterobacterales|f__Enterobacteriaceae|g__Enterobacter|-__Enterobacter_cloacae_complex|s__Enterobacter_cloacae
NZ_BEDS01000027.1:1431-4721	gi|1370570986|gb|AVQ44152.1|	97.79	770	16	1	982	3291	1	769	0	1518.1	AVQ44152.1	endonuclease [Clostridium botulinum]	944	live	1491	2018-03-26	2018-03-26		Clostridium botulinum	Bacteria	1	CP027778.1:3963837-3966671	CP027778.1	Clostridium botulinum strain Mfbjulcb6 chromosome, complete genome	4004635	L1P1_orf2	nr	bacteria	|-__root|-__cellular_organisms|k__Bacteria|-__Terrabacteria_group|p__Firmicutes|c__Clostridia|o__Clostridiales|f__Clostridiaceae|g__Clostridium|s__Clostridium_botulinum
NZ_CP023560.1:3107783-3107948	gi|1249967190|ref|WP_096784217.1|	100	30	0	0	92	3	1	30	7e-08	64.3	WP_096784217.1	hypothetical protein [Staphylococcus aureus]	60	live	1280	2017-10-04	2017-10-04		Staphylococcus aureus	Bacteria	1	NZ_CP023560.1:3107692-3107874	NZ_CP023560.1	Staphylococcus aureus strain NMR08 chromosome	3124697	L1P1_orf2	nr	bacteria	|-__root|-__cellular_organisms|k__Bacteria|-__Terrabacteria_group|p__Firmicutes|c__Bacilli|o__Bacillales|f__Staphylococcaceae|g__Staphylococcus|s__Staphylococcus_aureus
NZ_CP023560.1:3112477-3112640	gi|1249967193|ref|WP_096784220.1|	100	43	0	0	162	34	25	67	3e-15	89	WP_096784220.1	hypothetical protein [Staphylococcus aureus]	67	live	1280	2017-10-04	2017-10-04		Staphylococcus aureus	Bacteria	1	NZ_CP023560.1:3112507-3112710	NZ_CP023560.1	Staphylococcus aureus strain NMR08 chromosome	3124697	ALR	nr	bacteria	|-__root|-__cellular_organisms|k__Bacteria|-__Terrabacteria_group|p__Firmicutes|c__Bacilli|o__Bacillales|f__Staphylococcaceae|g__Staphylococcus|s__Staphylococcus_aureus
NZ_UGRJ01000003.1:1130579-1131300	gi|893693483|gb|KMW65646.1|	100	37	0	0	1	111	13	49	4e-15	90.1	KMW65646.1	hypothetical protein NGCG_01773, partial [Neisseria gonorrhoeae DGI18]	49	live	528347	2015-07-17	2015-07-17		Neisseria gonorrhoeae DGI18	Bacteria	2	EQ972671.1:23985-24136,EQ972957.1:23802-23953	EQ972671.1	Neisseria gonorrhoeae DGI18 supercont1.24 genomic scaffold, whole genome shotgun sequence	93199	L1HS_5end	nr	bacteria	|-__root|-__cellular_organisms|k__Bacteria|p__Proteobacteria|c__Betaproteobacteria|o__Neisseriales|f__Neisseriaceae|g__Neisseria|s__Neisseria_gonorrhoeae|-__Neisseria_gonorrhoeae_DGI18
NZ_UGRJ01000003.1:1130579-1131300	gi|899687750|gb|KMY25485.1|	97.14	35	1	0	89	193	1	35	5e-10	73.2	KMY25485.1	hypothetical protein NGDG_01745 [Neisseria gonorrhoeae FA6140]	35	live	528353	2015-07-21	2015-07-21		Neisseria gonorrhoeae FA6140	Bacteria	1	EQ972718.1:23892-23999	EQ972718.1	Neisseria gonorrhoeae FA6140 supercont1.29 genomic scaffold, whole genome shotgun sequence	93061	L1HS_5end	nr	bacteria	|-__root|-__cellular_organisms|k__Bacteria|p__Proteobacteria|c__Betaproteobacteria|o__Neisseriales|f__Neisseriaceae|g__Neisseria|s__Neisseria_gonorrhoeae|-__Neisseria_gonorrhoeae_FA6140
NZ_UGRJ01000003.1:1130579-1131300	gi|899687751|gb|KMY25486.1|	99.51	205	1	0	108	722	1	205	1e-114	420.6	KMY25486.1	transposase [Neisseria gonorrhoeae FA6140]	214	live	528353	2015-07-21	2015-07-21		Neisseria gonorrhoeae FA6140	Bacteria	1	EQ972718.1:23911-24555	EQ972718.1	Neisseria gonorrhoeae FA6140 supercont1.29 genomic scaffold, whole genome shotgun sequence	93061	L1HS_5end	nr	bacteria	|-__root|-__cellular_organisms|k__Bacteria|p__Proteobacteria|c__Betaproteobacteria|o__Neisseriales|f__Neisseriaceae|g__Neisseria|s__Neisseria_gonorrhoeae|-__Neisseria_gonorrhoeae_FA6140
NZ_PYPZ01000125.1:278-414	gi|1037156756|embl|SBT55970.1|	96.97	33	1	0	101	3	8	40	1e-10	73.2	SBT55970.1	PIR Superfamily Protein [Plasmodium ovale wallikeri]	383	live	864142	2016-06-16	2016-06-16		Plasmodium ovale wallikeri	Eukaryota	1	FLRE01001206.1:1-1913	FLRE01001206.1	Plasmodium ovale wallikeri genome assembly, contig: contig1206, whole genome shotgun sequence	38129	BSR	nr	bacteria	|-__root|-__cellular_organisms|k__Eukaryota|-__Alveolata|p__Apicomplexa|c__Aconoidasida|o__Haemosporida|f__Plasmodiidae|g__Plasmodium|-__Plasmodium_(Plasmodium)|s__Plasmodium_ovale|-__Plasmodium_ovale_wallikeri
NZ_NTUG01000095.1:4-172	gi|663521543|gb|AIF11849.1|	100	36	0	0	3	110	58	93	2e-11	75.9	AIF11849.1	hypothetical protein [uncultured marine thaumarchaeote KM3_53_F08]	93	live	1456186	2014-07-15	2014-07-15		uncultured marine thaumarchaeote KM3_53_F08	Archaea	1	KF900928.1:27032-27313	KF900928.1	Uncultured marine thaumarchaeote KM3_53_F08 genomic sequence	27443	ALR	nr	bacteria	|-__root|-__cellular_organisms|k__Archaea|-__TACK_group|p__Thaumarchaeota|-__environmental_samples|s__uncultured_marine_thaumarchaeote_KM3_53_F08
NZ_QKVY01000002.1:393-564	gi|1037157038|embl|SBT55693.1|	100	43	0	0	1	129	339	381	3e-18	98.6	SBT55693.1	PIR Superfamily Protein [Plasmodium ovale wallikeri]	392	live	864142	2016-06-16	2016-06-16		Plasmodium ovale wallikeri	Eukaryota	1	FLRE01001026.1:1-1526	FLRE01001026.1	Plasmodium ovale wallikeri genome assembly, contig: contig1026, whole genome shotgun sequence	23534	ALR	nr	bacteria	|-__root|-__cellular_organisms|k__Eukaryota|-__Alveolata|p__Apicomplexa|c__Aconoidasida|o__Haemosporida|f__Plasmodiidae|g__Plasmodium|-__Plasmodium_(Plasmodium)|s__Plasmodium_ovale|-__Plasmodium_ovale_wallikeri
NZ_PJCX01000431.1:188-496	gi|1037155918|embl|SBT56954.1|	96.88	32	1	0	40	135	649	680	7e-09	67.8	SBT56954.1	PIR Superfamily Protein [Plasmodium ovale wallikeri]	680	live	864142	2016-06-16	2016-06-16		Plasmodium ovale wallikeri	Eukaryota	1	FLRE01001625.1:12510-14972	FLRE01001625.1	Plasmodium ovale wallikeri genome assembly, contig: contig1625, whole genome shotgun sequence	14972	AluY	nr	bacteria	|-__root|-__cellular_organisms|k__Eukaryota|-__Alveolata|p__Apicomplexa|c__Aconoidasida|o__Haemosporida|f__Plasmodiidae|g__Plasmodium|-__Plasmodium_(Plasmodium)|s__Plasmodium_ovale|-__Plasmodium_ovale_wallikeri
NZ_FTZV01000303.1:2068-2238	gi|1037144979|embl|SBT55483.1|	100	42	0	0	126	1	27	68	4e-16	91.7	SBT55483.1	STP1 protein [Plasmodium ovale wallikeri]	716	live	864142	2016-06-16	2016-06-16		Plasmodium ovale wallikeri	Eukaryota	1	FLRD01000713.1:1-2691	FLRD01000713.1	Plasmodium ovale wallikeri genome assembly, contig: contig713, whole genome shotgun sequence	13153	ALR	nr	bacteria	|-__root|-__cellular_organisms|k__Eukaryota|-__Alveolata|p__Apicomplexa|c__Aconoidasida|o__Haemosporida|f__Plasmodiidae|g__Plasmodium|-__Plasmodium_(Plasmodium)|s__Plasmodium_ovale|-__Plasmodium_ovale_wallikeri
NZ_FPIJ01000010.1:1847-3180	gi|343473615|embl|CCD14538.1|	99.08	434	4	0	1329	28	10	443	5e-241	842	CCD14538.1	unnamed protein product [Trypanosoma congolense IL3000]	443	live	1068625	2011-08-04	2012-05-11		Trypanosoma congolense IL3000	Eukaryota	1	CAEQ01001556.1:163-1494	CAEQ01001556.1	Trypanosoma congolense IL3000 WGS project CAEQ00000000 data, annotated contig 2083, whole genome shotgun sequence	12492	L1P1_orf2	nr	bacteria	|-__root|-__cellular_organisms|k__Eukaryota|-__Euglenozoa|o__Kinetoplastida|f__Trypanosomatidae|g__Trypanosoma|-__Nannomonas|s__Trypanosoma_congolense|-__Trypanosoma_congolense_IL3000
NZ_FPIH01000023.1:675-2529	gi|343473616|embl|CCD14539.1|	97.87	563	12	0	1689	1	1	563	0	1126.3	CCD14539.1	unnamed protein product [Trypanosoma congolense IL3000]	710	live	1068625	2011-08-04	2012-05-11		Trypanosoma congolense IL3000	Eukaryota	1	CAEQ01001556.1:1789-3921	CAEQ01001556.1	Trypanosoma congolense IL3000 WGS project CAEQ00000000 data, annotated contig 2083, whole genome shotgun sequence	12492	L1P1_orf2	nr	bacteria	|-__root|-__cellular_organisms|k__Eukaryota|-__Euglenozoa|o__Kinetoplastida|f__Trypanosomatidae|g__Trypanosoma|-__Nannomonas|s__Trypanosoma_congolense|-__Trypanosoma_congolense_IL3000
NZ_FRWQ01000309.1:321-1385	gi|861635631|gb|KMQ91611.1|	98.2	334	6	0	1	1002	1	334	2e-189	670.2	KMQ91611.1	i38588 reverse transcriptase-like protein [Lasius niger]	346	live	67767	2015-07-02	2015-07-02		Lasius niger	Eukaryota	1	LBMM01005319.1:10982-12022	LBMM01005319.1	Lasius niger Lnig_2.1_5376, whole genome shotgun sequence	12199	L1P1_orf2	nr	bacteria	|-__root|-__cellular_organisms|k__Eukaryota|-__Opisthokonta|-__Metazoa|-__Eumetazoa|-__Bilateria|-__Protostomia|-__Ecdysozoa|-__Panarthropoda|p__Arthropoda|-__Mandibulata|-__Pancrustacea|-__Hexapoda|c__Insecta|-__Dicondylia|-__Pterygota|-__Neoptera|-__Holometabola|o__Hymenoptera|-__Apocrita|-__Aculeata|-__Formicoidea|f__Formicidae|-__Formicinae|-__Lasiini|g__Lasius|-__Lasius|s__Lasius_niger
NZ_CVNJ01000005.1:5066-6572	gi|1197015673|ref|WP_086427331.1|	97.12	486	14	0	1503	46	10	495	4e-268	932.6	WP_086427331.1	hypothetical protein [Chlamydia abortus]	499	live	83555	2017-05-24	2017-05-24		Chlamydia abortus	Bacteria	2	NZ_FQLM01000003.1:2789-4288,FQLM01000003.1:2789-4288	NZ_FQLM01000003.1	Chlamydia abortus strain 15a, whole genome shotgun sequence	11600	L1P1_orf2	nr	bacteria	|-__root|-__cellular_organisms|k__Bacteria|-__PVC_group|p__Chlamydiae|c__Chlamydiia|o__Chlamydiales|f__Chlamydiaceae|-__Chlamydia/Chlamydophila_group|g__Chlamydia|s__Chlamydia_abortus
NZ_FQLM01000003.1:4122-5041	gi|1197015674|ref|WP_086427332.1|	100	236	0	0	918	211	413	648	2e-130	473.8	WP_086427332.1	hypothetical protein [Chlamydia abortus]	648	live	83555	2017-05-24	2017-05-24		Chlamydia abortus	Bacteria	2	NZ_FQLM01000003.1:4329-6275,FQLM01000003.1:4329-6275	NZ_FQLM01000003.1	Chlamydia abortus strain 15a, whole genome shotgun sequence	11600	L1PBa_5end	nr	bacteria	|-__root|-__cellular_organisms|k__Bacteria|-__PVC_group|p__Chlamydiae|c__Chlamydiia|o__Chlamydiales|f__Chlamydiaceae|-__Chlamydia/Chlamydophila_group|g__Chlamydia|s__Chlamydia_abortus
NZ_FQLM01000003.1:8288-8668	gi|1197015677|ref|WP_086427335.1|	100	127	0	0	381	1	12	138	8e-67	260.4	WP_086427335.1	hypothetical protein [Chlamydia abortus]	147	live	83555	2017-05-24	2017-05-24		Chlamydia abortus	Bacteria	2	NZ_FQLM01000003.1:8258-8701,FQLM01000003.1:8258-8701	NZ_FQLM01000003.1	Chlamydia abortus strain 15a, whole genome shotgun sequence	11600	L1P1_orf2	nr	bacteria	|-__root|-__cellular_organisms|k__Bacteria|-__PVC_group|p__Chlamydiae|c__Chlamydiia|o__Chlamydiales|f__Chlamydiaceae|-__Chlamydia/Chlamydophila_group|g__Chlamydia|s__Chlamydia_abortus
NZ_FPIJ01000009.1:1501-2185	gi|1190713218|embl|SFW05767.1|	97.33	187	4	1	3	560	97	283	5e-96	358.6	SFW05767.1	L1 transposable element [Chlamydia abortus]	305	live	83555	2017-05-10	2017-05-10		Chlamydia abortus	Bacteria	1	FPIJ01000009.1:45-962	FPIJ01000009.1	Chlamydophila abortus strain T20 genome assembly, contig: ERS003308SCcontig000009, whole genome shotgun sequence	11520	L1PBa_5end	nr	bacteria	|-__root|-__cellular_organisms|k__Bacteria|-__PVC_group|p__Chlamydiae|c__Chlamydiia|o__Chlamydiales|f__Chlamydiaceae|-__Chlamydia/Chlamydophila_group|g__Chlamydia|s__Chlamydia_abortus
NZ_FQLM01000003.1:4122-5041	gi|1190713221|embl|SFW05773.1|	95.34	236	11	0	918	211	33	268	2e-124	453.8	SFW05773.1	L1 transposable element [Chlamydia abortus]	268	live	83555	2017-05-10	2017-05-10		Chlamydia abortus	Bacteria	1	FPIJ01000009.1:4629-5435	FPIJ01000009.1	Chlamydophila abortus strain T20 genome assembly, contig: ERS003308SCcontig000009, whole genome shotgun sequence	11520	L1PBa_5end	nr	bacteria	|-__root|-__cellular_organisms|k__Bacteria|-__PVC_group|p__Chlamydiae|c__Chlamydiia|o__Chlamydiales|f__Chlamydiaceae|-__Chlamydia/Chlamydophila_group|g__Chlamydia|s__Chlamydia_abortus
NZ_FPIJ01000009.1:5782-6591	gi|1190713223|embl|SFW05778.1|	100	183	0	0	48	596	1	183	3e-100	373.2	SFW05778.1	L1 transposable element [Chlamydia abortus]	183	live	83555	2017-05-10	2017-05-10		Chlamydia abortus	Bacteria	1	FPIJ01000009.1:5829-6380	FPIJ01000009.1	Chlamydophila abortus strain T20 genome assembly, contig: ERS003308SCcontig000009, whole genome shotgun sequence	11520	L1HS_5end	nr	bacteria	|-__root|-__cellular_organisms|k__Bacteria|-__PVC_group|p__Chlamydiae|c__Chlamydiia|o__Chlamydiales|f__Chlamydiaceae|-__Chlamydia/Chlamydophila_group|g__Chlamydia|s__Chlamydia_abortus
NZ_FQLM01000003.1:4122-5041	gi|1190713225|embl|SFW05784.1|	95.95	222	9	0	876	211	1	222	4e-117	429.5	SFW05784.1	L1 transposable element [Chlamydia abortus]	222	live	83555	2017-05-10	2017-05-10		Chlamydia abortus	Bacteria	1	FPIJ01000009.1:6810-7478	FPIJ01000009.1	Chlamydophila abortus strain T20 genome assembly, contig: ERS003308SCcontig000009, whole genome shotgun sequence	11520	L1PBa_5end	nr	bacteria	|-__root|-__cellular_organisms|k__Bacteria|-__PVC_group|p__Chlamydiae|c__Chlamydiia|o__Chlamydiales|f__Chlamydiaceae|-__Chlamydia/Chlamydophila_group|g__Chlamydia|s__Chlamydia_abortus
NZ_FPIJ01000009.1:1501-2185	gi|1196979745|ref|WP_086400403.1|	97.33	187	4	1	3	560	111	297	5e-96	358.6	WP_086400403.1	hypothetical protein, partial [Chlamydia abortus]	319	live	83555	2017-05-24	2017-05-24		Chlamydia abortus	Bacteria	1	NZ_FPIJ01000009.1:1-962	NZ_FPIJ01000009.1	Chlamydia abortus strain T20, whole genome shotgun sequence	11520	L1PBa_5end	nr	bacteria	|-__root|-__cellular_organisms|k__Bacteria|-__PVC_group|p__Chlamydiae|c__Chlamydiia|o__Chlamydiales|f__Chlamydiaceae|-__Chlamydia/Chlamydophila_group|g__Chlamydia|s__Chlamydia_abortus
NZ_FQLM01000003.1:4122-5041	gi|1196979746|ref|WP_086400404.1|	95.76	236	10	0	918	211	447	682	8e-124	451.8	WP_086400404.1	hypothetical protein [Chlamydia abortus]	682	live	83555	2017-05-24	2017-05-24		Chlamydia abortus	Bacteria	2	NZ_FPIJ01000009.1:1116-3164,FPIJ01000009.1:1116-3164	NZ_FPIJ01000009.1	Chlamydia abortus strain T20, whole genome shotgun sequence	11520	L1PBa_5end	nr	bacteria	|-__root|-__cellular_organisms|k__Bacteria|-__PVC_group|p__Chlamydiae|c__Chlamydiia|o__Chlamydiales|f__Chlamydiaceae|-__Chlamydia/Chlamydophila_group|g__Chlamydia|s__Chlamydia_abortus
NZ_FPIJ01000009.1:3228-4621	gi|1196979747|ref|WP_086400405.1|	100	464	0	0	2	1393	9	472	2e-261	909.8	WP_086400405.1	hypothetical protein [Chlamydia abortus]	472	live	83555	2017-05-24	2017-05-24		Chlamydia abortus	Bacteria	2	NZ_FPIJ01000009.1:3205-4623,FPIJ01000009.1:3205-4623	NZ_FPIJ01000009.1	Chlamydia abortus strain T20, whole genome shotgun sequence	11520	L1P1_orf2	nr	bacteria	|-__root|-__cellular_organisms|k__Bacteria|-__PVC_group|p__Chlamydiae|c__Chlamydiia|o__Chlamydiales|f__Chlamydiaceae|-__Chlamydia/Chlamydophila_group|g__Chlamydia|s__Chlamydia_abortus
NZ_FQLM01000003.1:4122-5041	gi|1196979748|ref|WP_086400406.1|	95.34	236	11	0	918	211	35	270	2e-124	453.8	WP_086400406.1	hypothetical protein [Chlamydia abortus]	270	live	83555	2017-05-24	2017-05-24		Chlamydia abortus	Bacteria	1	NZ_FPIJ01000009.1:4623-5435	NZ_FPIJ01000009.1	Chlamydia abortus strain T20, whole genome shotgun sequence	11520	L1PBa_5end	nr	bacteria	|-__root|-__cellular_organisms|k__Bacteria|-__PVC_group|p__Chlamydiae|c__Chlamydiia|o__Chlamydiales|f__Chlamydiaceae|-__Chlamydia/Chlamydophila_group|g__Chlamydia|s__Chlamydia_abortus
NZ_FPIJ01000009.1:5782-6591	gi|1196979750|ref|WP_086400408.1|	100	198	0	0	3	596	11	208	3e-109	402.9	WP_086400408.1	hypothetical protein [Chlamydia abortus]	208	live	83555	2017-05-24	2017-05-24		Chlamydia abortus	Bacteria	1	NZ_FPIJ01000009.1:5754-6380	NZ_FPIJ01000009.1	Chlamydia abortus strain T20, whole genome shotgun sequence	11520	L1HS_5end	nr	bacteria	|-__root|-__cellular_organisms|k__Bacteria|-__PVC_group|p__Chlamydiae|c__Chlamydiia|o__Chlamydiales|f__Chlamydiaceae|-__Chlamydia/Chlamydophila_group|g__Chlamydia|s__Chlamydia_abortus
NZ_FPIJ01000010.1:1847-3180	gi|1196979751|ref|WP_086400409.1|	98.85	87	1	0	1332	1072	9	95	1e-42	183	WP_086400409.1	hypothetical protein [Chlamydia abortus]	98	live	83555	2017-05-24	2017-05-24		Chlamydia abortus	Bacteria	2	NZ_FPIJ01000009.1:6421-6717,FPIJ01000009.1:6421-6717	NZ_FPIJ01000009.1	Chlamydia abortus strain T20, whole genome shotgun sequence	11520	L1P1_orf2	nr	bacteria	|-__root|-__cellular_organisms|k__Bacteria|-__PVC_group|p__Chlamydiae|c__Chlamydiia|o__Chlamydiales|f__Chlamydiaceae|-__Chlamydia/Chlamydophila_group|g__Chlamydia|s__Chlamydia_abortus
NZ_FQLM01000003.1:4122-5041	gi|1196979752|ref|WP_086400410.1|	96.19	236	9	0	918	211	19	254	1e-124	454.9	WP_086400410.1	hypothetical protein [Chlamydia abortus]	254	live	83555	2017-05-24	2017-05-24		Chlamydia abortus	Bacteria	1	NZ_FPIJ01000009.1:6714-7478	NZ_FPIJ01000009.1	Chlamydia abortus strain T20, whole genome shotgun sequence	11520	L1PBa_5end	nr	bacteria	|-__root|-__cellular_organisms|k__Bacteria|-__PVC_group|p__Chlamydiae|c__Chlamydiia|o__Chlamydiales|f__Chlamydiaceae|-__Chlamydia/Chlamydophila_group|g__Chlamydia|s__Chlamydia_abortus
NZ_FPIJ01000009.1:7540-7919	gi|1196979753|ref|WP_086400411.1|	100	126	0	0	1	378	8	133	2e-67	262.3	WP_086400411.1	hypothetical protein [Chlamydia abortus]	145	live	83555	2017-05-24	2017-05-24		Chlamydia abortus	Bacteria	2	NZ_FPIJ01000009.1:7519-7956,FPIJ01000009.1:7519-7956	NZ_FPIJ01000009.1	Chlamydia abortus strain T20, whole genome shotgun sequence	11520	L1P1_orf2	nr	bacteria	|-__root|-__cellular_organisms|k__Bacteria|-__PVC_group|p__Chlamydiae|c__Chlamydiia|o__Chlamydiales|f__Chlamydiaceae|-__Chlamydia/Chlamydophila_group|g__Chlamydia|s__Chlamydia_abortus
NZ_FPIJ01000009.1:9249-10593	gi|1196979754|ref|WP_086400412.1|	100	448	0	0	2	1345	9	456	1e-251	877.5	WP_086400412.1	hypothetical protein [Chlamydia abortus]	458	live	83555	2017-05-24	2017-05-24		Chlamydia abortus	Bacteria	2	NZ_FPIJ01000009.1:9226-10602,FPIJ01000009.1:9226-10602	NZ_FPIJ01000009.1	Chlamydia abortus strain T20, whole genome shotgun sequence	11520	L1P1_orf2	nr	bacteria	|-__root|-__cellular_organisms|k__Bacteria|-__PVC_group|p__Chlamydiae|c__Chlamydiia|o__Chlamydiales|f__Chlamydiaceae|-__Chlamydia/Chlamydophila_group|g__Chlamydia|s__Chlamydia_abortus
NZ_QETM01000070.1:1086-1399	gi|884051408|embl|CKC03773.1|	100	104	0	0	313	2	3	106	4e-54	218	CKC03773.1	Uncharacterised protein [Streptococcus pneumoniae]	190	live	1313	2015-03-23	2015-06-13		Streptococcus pneumoniae	Bacteria	1	CMKS01000044.1:6940-7512	CMKS01000044.1	Streptococcus pneumoniae genome assembly 7054_4#6, scaffold ERS022540SCcontig000044, whole genome shotgun sequence	10407	AluSx	nr	bacteria	|-__root|-__cellular_organisms|k__Bacteria|-__Terrabacteria_group|p__Firmicutes|c__Bacilli|o__Lactobacillales|f__Streptococcaceae|g__Streptococcus|s__Streptococcus_pneumoniae
NZ_QETM01000070.1:1450-1772	gi|884051409|embl|CKC03796.1|	100	97	0	0	322	32	29	125	5e-52	211.1	CKC03796.1	Uncharacterised protein [Streptococcus pneumoniae]	126	live	1313	2015-03-23	2015-06-13		Streptococcus pneumoniae	Bacteria	1	CMKS01000044.1:7587-7967	CMKS01000044.1	Streptococcus pneumoniae genome assembly 7054_4#6, scaffold ERS022540SCcontig000044, whole genome shotgun sequence	10407	AluSg	nr	bacteria	|-__root|-__cellular_organisms|k__Bacteria|-__Terrabacteria_group|p__Firmicutes|c__Bacilli|o__Lactobacillales|f__Streptococcaceae|g__Streptococcus|s__Streptococcus_pneumoniae
NZ_QETM01000070.1:2281-2602	gi|884051410|embl|CKC03822.1|	96.43	28	1	0	123	40	1	28	9e-09	67.4	CKC03822.1	Uncharacterised protein [Streptococcus pneumoniae]	167	live	1313	2015-03-23	2015-06-13		Streptococcus pneumoniae	Bacteria	1	CMKS01000044.1:8033-8536	CMKS01000044.1	Streptococcus pneumoniae genome assembly 7054_4#6, scaffold ERS022540SCcontig000044, whole genome shotgun sequence	10407	AluSx	nr	bacteria	|-__root|-__cellular_organisms|k__Bacteria|-__Terrabacteria_group|p__Firmicutes|c__Bacilli|o__Lactobacillales|f__Streptococcaceae|g__Streptococcus|s__Streptococcus_pneumoniae
NZ_QETM01000070.1:2281-2602	gi|884051411|embl|CKC03845.1|	100	51	0	0	168	320	1	51	8e-21	107.5	CKC03845.1	Ribosomal protein S12 [Streptococcus pneumoniae]	301	live	1313	2015-03-23	2015-06-13		Streptococcus pneumoniae	Bacteria	1	CMKS01000044.1:8581-9486	CMKS01000044.1	Streptococcus pneumoniae genome assembly 7054_4#6, scaffold ERS022540SCcontig000044, whole genome shotgun sequence	10407	AluSx	nr	bacteria	|-__root|-__cellular_organisms|k__Bacteria|-__Terrabacteria_group|p__Firmicutes|c__Bacilli|o__Lactobacillales|f__Streptococcaceae|g__Streptococcus|s__Streptococcus_pneumoniae
NZ_QETM01000070.1:2281-2602	gi|913376244|ref|WP_050389093.1|	100	30	0	0	322	233	217	246	8e-10	70.9	WP_050389093.1	hypothetical protein [Streptococcus pneumoniae]	246	live	1313	2015-08-06	2015-08-06		Streptococcus pneumoniae	Bacteria	1	NZ_CMKS01000044.1:8643-9383	NZ_CMKS01000044.1	Streptococcus pneumoniae strain SMRU3030, whole genome shotgun sequence	10407	AluSx	nr	bacteria	|-__root|-__cellular_organisms|k__Bacteria|-__Terrabacteria_group|p__Firmicutes|c__Bacilli|o__Lactobacillales|f__Streptococcaceae|g__Streptococcus|s__Streptococcus_pneumoniae
NZ_QETM01000070.1:3216-3543	gi|913376245|ref|WP_050389094.1|	100	30	0	0	328	239	39	68	3e-08	65.5	WP_050389094.1	MULTISPECIES: hypothetical protein [Streptococcus]	68	live	1301	2015-08-06	2018-05-23		Streptococcus	Bacteria	3	NZ_CMKS01000044.1:9682-9888,NZ_QEMY01000845.1:409-615,QEMY01000845.1:409-615	NZ_CMKS01000044.1	Streptococcus pneumoniae strain SMRU3030, whole genome shotgun sequence	10407	AluSx	nr	bacteria	|-__root|-__cellular_organisms|k__Bacteria|-__Terrabacteria_group|p__Firmicutes|c__Bacilli|o__Lactobacillales|f__Streptococcaceae|g__Streptococcus
NZ_FPIH01000010.1:1557-2962	gi|1190717850|embl|SFW05721.1|	100	468	0	0	2	1405	9	476	2e-260	906.4	SFW05721.1	Exodeoxyribonuclease [Chlamydia abortus]	492	live	83555	2017-05-10	2017-05-10		Chlamydia abortus	Bacteria	1	FPIH01000010.1:1534-3012	FPIH01000010.1	Chlamydophila abortus strain 86/30 genome assembly, contig: ERS008766SCcontig000010, whole genome shotgun sequence	10174	L1P1_orf2	nr	bacteria	|-__root|-__cellular_organisms|k__Bacteria|-__PVC_group|p__Chlamydiae|c__Chlamydiia|o__Chlamydiales|f__Chlamydiaceae|-__Chlamydia/Chlamydophila_group|g__Chlamydia|s__Chlamydia_abortus
NZ_FPIK01000009.1:93-776	gi|1190717852|embl|SFW05726.1|	99.12	227	2	0	683	3	27	253	1e-123	450.3	SFW05726.1	L1 transposable element [Chlamydia abortus]	268	live	83555	2017-05-10	2017-05-10		Chlamydia abortus	Bacteria	1	FPIH01000010.1:4047-4853	FPIH01000010.1	Chlamydophila abortus strain 86/30 genome assembly, contig: ERS008766SCcontig000010, whole genome shotgun sequence	10174	L1PBa_5end	nr	bacteria	|-__root|-__cellular_organisms|k__Bacteria|-__PVC_group|p__Chlamydiae|c__Chlamydiia|o__Chlamydiales|f__Chlamydiaceae|-__Chlamydia/Chlamydophila_group|g__Chlamydia|s__Chlamydia_abortus
NZ_FPIH01000010.1:4916-5560	gi|1190717853|embl|SFW05730.1|	100	214	0	0	3	644	9	222	8e-121	440.7	SFW05730.1	exonuclease III [Chlamydia abortus]	291	live	83555	2017-05-10	2017-05-10		Chlamydia abortus	Bacteria	1	FPIH01000010.1:4894-5769	FPIH01000010.1	Chlamydophila abortus strain 86/30 genome assembly, contig: ERS008766SCcontig000010, whole genome shotgun sequence	10174	L1P1_orf2	nr	bacteria	|-__root|-__cellular_organisms|k__Bacteria|-__PVC_group|p__Chlamydiae|c__Chlamydiia|o__Chlamydiales|f__Chlamydiaceae|-__Chlamydia/Chlamydophila_group|g__Chlamydia|s__Chlamydia_abortus
NZ_FPIJ01000009.1:5782-6591	gi|1190717854|embl|SFW05736.1|	96.17	183	7	0	48	596	1	183	2e-96	360.1	SFW05736.1	L1 transposable element [Chlamydia abortus]	183	live	83555	2017-05-10	2017-05-10		Chlamydia abortus	Bacteria	1	FPIH01000010.1:5732-6283	FPIH01000010.1	Chlamydophila abortus strain 86/30 genome assembly, contig: ERS008766SCcontig000010, whole genome shotgun sequence	10174	L1HS_5end	nr	bacteria	|-__root|-__cellular_organisms|k__Bacteria|-__PVC_group|p__Chlamydiae|c__Chlamydiia|o__Chlamydiales|f__Chlamydiaceae|-__Chlamydia/Chlamydophila_group|g__Chlamydia|s__Chlamydia_abortus
NZ_FPIJ01000009.1:9249-10593	gi|1190717855|embl|SFW05737.1|	98.42	443	7	0	2	1330	9	451	2e-245	857.1	SFW05737.1	exonuclease III [Chlamydia abortus]	556	live	83555	2017-05-10	2017-05-10		Chlamydia abortus	Bacteria	1	FPIH01000010.1:6324-7994	FPIH01000010.1	Chlamydophila abortus strain 86/30 genome assembly, contig: ERS008766SCcontig000010, whole genome shotgun sequence	10174	L1P1_orf2	nr	bacteria	|-__root|-__cellular_organisms|k__Bacteria|-__PVC_group|p__Chlamydiae|c__Chlamydiia|o__Chlamydiales|f__Chlamydiaceae|-__Chlamydia/Chlamydophila_group|g__Chlamydia|s__Chlamydia_abortus
NZ_FQLK01000004.1:94-712	gi|1196985410|ref|WP_086404969.1|	99.45	182	1	0	2	547	130	311	7e-97	360.9	WP_086404969.1	hypothetical protein [Chlamydia abortus]	312	live	83555	2017-05-24	2017-05-24		Chlamydia abortus	Bacteria	2	NZ_FPIH01000010.1:3029-3967,FPIH01000010.1:3029-3967	NZ_FPIH01000010.1	Chlamydia abortus strain 86/30, whole genome shotgun sequence	10174	L1PBa_5end	nr	bacteria	|-__root|-__cellular_organisms|k__Bacteria|-__PVC_group|p__Chlamydiae|c__Chlamydiia|o__Chlamydiales|f__Chlamydiaceae|-__Chlamydia/Chlamydophila_group|g__Chlamydia|s__Chlamydia_abortus
NZ_FPIK01000009.1:93-776	gi|1196985411|ref|WP_086404970.1|	99.12	227	2	0	683	3	47	273	1e-123	450.3	WP_086404970.1	hypothetical protein [Chlamydia abortus]	288	live	83555	2017-05-24	2017-05-24		Chlamydia abortus	Bacteria	1	NZ_FPIH01000010.1:3987-4853	NZ_FPIH01000010.1	Chlamydia abortus strain 86/30, whole genome shotgun sequence	10174	L1PBa_5end	nr	bacteria	|-__root|-__cellular_organisms|k__Bacteria|-__PVC_group|p__Chlamydiae|c__Chlamydiia|o__Chlamydiales|f__Chlamydiaceae|-__Chlamydia/Chlamydophila_group|g__Chlamydia|s__Chlamydia_abortus
NZ_FPIK01000009.1:2551-3360	gi|1196985412|ref|WP_086404971.1|	95.95	173	7	0	733	215	1	173	2e-90	340.9	WP_086404971.1	hypothetical protein [Chlamydia abortus]	173	live	83555	2017-05-24	2017-05-24		Chlamydia abortus	Bacteria	1	NZ_FPIH01000010.1:5762-6283	NZ_FPIH01000010.1	Chlamydia abortus strain 86/30, whole genome shotgun sequence	10174	L1HS_5end	nr	bacteria	|-__root|-__cellular_organisms|k__Bacteria|-__PVC_group|p__Chlamydiae|c__Chlamydiia|o__Chlamydiales|f__Chlamydiaceae|-__Chlamydia/Chlamydophila_group|g__Chlamydia|s__Chlamydia_abortus
NZ_FPIH01000010.1:4916-5560	gi|1196985414|ref|WP_086404973.1|	100	214	0	0	3	644	2	215	8e-121	440.7	WP_086404973.1	hypothetical protein [Chlamydia abortus]	284	live	83555	2017-05-24	2017-05-24		Chlamydia abortus	Bacteria	1	NZ_FPIH01000010.1:4915-5769	NZ_FPIH01000010.1	Chlamydia abortus strain 86/30, whole genome shotgun sequence	10174	L1P1_orf2	nr	bacteria	|-__root|-__cellular_organisms|k__Bacteria|-__PVC_group|p__Chlamydiae|c__Chlamydiia|o__Chlamydiales|f__Chlamydiaceae|-__Chlamydia/Chlamydophila_group|g__Chlamydia|s__Chlamydia_abortus
NZ_BEDS01000027.1:1431-4721	gi|1314812326|dbj|GBE63528.1|	98.73	946	12	0	454	3291	1	946	0	1800.8	GBE63528.1	Retrovirus-related Pol poly LINE-1, putative [Babesia ovata]	1121	live	189622	2017-12-16	2017-12-16		Babesia ovata	Eukaryota	1	BDSA01000072.1:369-3734	BDSA01000072.1	Babesia ovata DNA, contig: BOVATA_72_v07, strain: Miyake, whole genome shotgun sequence	8691	L1P1_orf2	nr	bacteria	|-__root|-__cellular_organisms|k__Eukaryota|-__Alveolata|p__Apicomplexa|c__Aconoidasida|-__Piroplasmida|f__Babesiidae|g__Babesia|s__Babesia_ovata
NZ_BEAF01000015.1:4285-5052	gi|1314812327|dbj|GBE63529.1|	98.82	255	3	0	768	4	54	308	1e-105	391	GBE63529.1	LINE-1 type transposase domain-containing 1-like protein [Babesia ovata]	308	live	189622	2017-12-16	2017-12-16		Babesia ovata	Eukaryota	1	BDSA01000072.1:4238-5164	BDSA01000072.1	Babesia ovata DNA, contig: BOVATA_72_v07, strain: Miyake, whole genome shotgun sequence	8691	L1PBa_5end	nr	bacteria	|-__root|-__cellular_organisms|k__Eukaryota|-__Alveolata|p__Apicomplexa|c__Aconoidasida|-__Piroplasmida|f__Babesiidae|g__Babesia|s__Babesia_ovata
NZ_FXYJ02000037.1:183-353	gi|1037157654|embl|SBT54765.1|	100	57	0	0	171	1	123	179	2e-23	116.3	SBT54765.1	STP1 protein [Plasmodium ovale wallikeri]	753	live	864142	2016-06-16	2016-06-16		Plasmodium ovale wallikeri	Eukaryota	1	FLRE01000654.1:1-3019	FLRE01000654.1	Plasmodium ovale wallikeri genome assembly, contig: contig654, whole genome shotgun sequence	8288	ALR	nr	bacteria	|-__root|-__cellular_organisms|k__Eukaryota|-__Alveolata|p__Apicomplexa|c__Aconoidasida|o__Haemosporida|f__Plasmodiidae|g__Plasmodium|-__Plasmodium_(Plasmodium)|s__Plasmodium_ovale|-__Plasmodium_ovale_wallikeri
NZ_FPIH01000022.1:915-2032	gi|1168803990|ref|WP_080373930.1|	99.72	360	1	0	1080	1	1	360	4e-215	755.7	WP_080373930.1	DUF1725 domain-containing protein [Chlamydia trachomatis]	536	live	813	2017-03-26	2017-07-09		Chlamydia trachomatis	Bacteria	2	NZ_CVNJ01000005.1:1123-2733,CVNJ01000005.1:1123-2733	NZ_CVNJ01000005.1	Chlamydia trachomatis strain R28017IMS, whole genome shotgun sequence	8226	L1P1_orf2	nr	bacteria	|-__root|-__cellular_organisms|k__Bacteria|-__PVC_group|p__Chlamydiae|c__Chlamydiia|o__Chlamydiales|f__Chlamydiaceae|-__Chlamydia/Chlamydophila_group|g__Chlamydia|s__Chlamydia_trachomatis
NZ_FPIJ01000046.1:21-372	gi|809290324|embl|CRH42966.1|	100	28	0	0	2	85	64	91	8e-08	64.3	CRH42966.1	Uncharacterised protein [Chlamydia trachomatis]	91	live	813	2015-04-21	2015-06-13		Chlamydia trachomatis	Bacteria	1	CVNJ01000005.1:119-394	CVNJ01000005.1	Chlamydia trachomatis genome assembly 7396_3#13, scaffold ERS075188SCcontig000005, whole genome shotgun sequence	8226	L1HS_3end	nr	bacteria	|-__root|-__cellular_organisms|k__Bacteria|-__PVC_group|p__Chlamydiae|c__Chlamydiia|o__Chlamydiales|f__Chlamydiaceae|-__Chlamydia/Chlamydophila_group|g__Chlamydia|s__Chlamydia_trachomatis
NZ_CVNJ01000005.1:306-648	gi|809290325|embl|CRH42968.1|	100	58	0	0	170	343	1	58	1e-24	120.2	CRH42968.1	Uncharacterised protein [Chlamydia trachomatis]	100	live	813	2015-04-21	2015-06-13		Chlamydia trachomatis	Bacteria	1	CVNJ01000005.1:475-777	CVNJ01000005.1	Chlamydia trachomatis genome assembly 7396_3#13, scaffold ERS075188SCcontig000005, whole genome shotgun sequence	8226	L1HS_3end	nr	bacteria	|-__root|-__cellular_organisms|k__Bacteria|-__PVC_group|p__Chlamydiae|c__Chlamydiia|o__Chlamydiales|f__Chlamydiaceae|-__Chlamydia/Chlamydophila_group|g__Chlamydia|s__Chlamydia_trachomatis
NZ_FPIJ01000012.1:1-1159	gi|809290328|embl|CRH42973.1|	100	266	0	0	220	1017	1	266	3e-146	526.9	CRH42973.1	Retron-type reverse transcriptase [Chlamydia trachomatis]	273	live	813	2015-04-21	2015-06-13		Chlamydia trachomatis	Bacteria	1	CVNJ01000005.1:3955-4776	CVNJ01000005.1	Chlamydia trachomatis genome assembly 7396_3#13, scaffold ERS075188SCcontig000005, whole genome shotgun sequence	8226	L1P1_orf2	nr	bacteria	|-__root|-__cellular_organisms|k__Bacteria|-__PVC_group|p__Chlamydiae|c__Chlamydiia|o__Chlamydiales|f__Chlamydiaceae|-__Chlamydia/Chlamydophila_group|g__Chlamydia|s__Chlamydia_trachomatis
NZ_FPIL01000018.1:1-462	gi|950129148|ref|WP_057184880.1|	100	80	0	0	202	441	1	80	7e-40	171	WP_057184880.1	MULTISPECIES: DUF1725 domain-containing protein [Chlamydia]	80	live	810	2015-11-09	2017-07-08		Chlamydia	Bacteria	6	NZ_CVNJ01000005.1:324-566,NZ_CVNW01000026.1:25-267,NZ_FPIH01000046.1:471-713,NZ_FPIJ01000046.1:38-280,NZ_FPIK01000245.1:24-266,NZ_FPIL01000018.1:202-444	NZ_CVNJ01000005.1	Chlamydia trachomatis strain R28017IMS, whole genome shotgun sequence	8226	L1HS_3end	nr	bacteria	|-__root|-__cellular_organisms|k__Bacteria|-__PVC_group|p__Chlamydiae|c__Chlamydiia|o__Chlamydiales|f__Chlamydiaceae|-__Chlamydia/Chlamydophila_group|g__Chlamydia
NZ_CVNJ01000005.1:2760-3985	gi|950129153|ref|WP_057184884.1|	100	408	0	0	1226	3	2	409	1e-239	837.4	WP_057184884.1	hypothetical protein [Chlamydia trachomatis]	411	live	813	2015-11-09	2015-11-09		Chlamydia trachomatis	Bacteria	2	NZ_CVNJ01000005.1:2753-3988,CVNJ01000005.1:2753-3988	NZ_CVNJ01000005.1	Chlamydia trachomatis strain R28017IMS, whole genome shotgun sequence	8226	L1P1_orf2	nr	bacteria	|-__root|-__cellular_organisms|k__Bacteria|-__PVC_group|p__Chlamydiae|c__Chlamydiia|o__Chlamydiales|f__Chlamydiaceae|-__Chlamydia/Chlamydophila_group|g__Chlamydia|s__Chlamydia_trachomatis
NZ_FQLM01000003.1:4122-5041	gi|950129156|ref|WP_057184887.1|	95.76	236	10	0	918	211	264	499	8e-124	451.8	WP_057184887.1	hypothetical protein [Chlamydia trachomatis]	499	live	813	2015-11-09	2015-11-09		Chlamydia trachomatis	Bacteria	2	NZ_CVNJ01000005.1:6636-8135,CVNJ01000005.1:6636-8135	NZ_CVNJ01000005.1	Chlamydia trachomatis strain R28017IMS, whole genome shotgun sequence	8226	L1PBa_5end	nr	bacteria	|-__root|-__cellular_organisms|k__Bacteria|-__PVC_group|p__Chlamydiae|c__Chlamydiia|o__Chlamydiales|f__Chlamydiaceae|-__Chlamydia/Chlamydophila_group|g__Chlamydia|s__Chlamydia_trachomatis
NZ_FQSZ01000002.1:3949-6601	gi|1190674706|embl|SHD82720.1|	100	808	0	0	230	2653	1	808	0	1610.5	SHD82720.1	Retron-type reverse transcriptase [Chlamydia abortus]	815	live	83555	2017-05-10	2017-05-10		Chlamydia abortus	Bacteria	1	FQSZ01000002.1:4178-6625	FQSZ01000002.1	Chlamydia abortus strain S3_3 genome assembly, contig: ERS067067SCcontig000002, whole genome shotgun sequence	8191	L1P1_orf2	nr	bacteria	|-__root|-__cellular_organisms|k__Bacteria|-__PVC_group|p__Chlamydiae|c__Chlamydiia|o__Chlamydiales|f__Chlamydiaceae|-__Chlamydia/Chlamydophila_group|g__Chlamydia|s__Chlamydia_abortus
NZ_FQSZ01000002.1:6603-7541	gi|1190674707|embl|SHD82723.1|	100	284	0	0	88	939	1	284	2e-169	603.6	SHD82723.1	Retron-type reverse transcriptase [Chlamydia abortus]	460	live	83555	2017-05-10	2017-05-10		Chlamydia abortus	Bacteria	1	FQSZ01000002.1:6690-8072	FQSZ01000002.1	Chlamydia abortus strain S3_3 genome assembly, contig: ERS067067SCcontig000002, whole genome shotgun sequence	8191	L1P1_orf2	nr	bacteria	|-__root|-__cellular_organisms|k__Bacteria|-__PVC_group|p__Chlamydiae|c__Chlamydiia|o__Chlamydiales|f__Chlamydiaceae|-__Chlamydia/Chlamydophila_group|g__Chlamydia|s__Chlamydia_abortus
NZ_FPIJ01000009.1:3228-4621	gi|1196970917|ref|WP_086393220.1|	97.67	301	7	0	5	907	10	310	1e-170	608.6	WP_086393220.1	hypothetical protein [Chlamydia abortus]	313	live	83555	2017-05-24	2017-05-24		Chlamydia abortus	Bacteria	2	NZ_FQSZ01000002.1:1778-2719,FQSZ01000002.1:1778-2719	NZ_FQSZ01000002.1	Chlamydia abortus strain S3_3, whole genome shotgun sequence	8191	L1P1_orf2	nr	bacteria	|-__root|-__cellular_organisms|k__Bacteria|-__PVC_group|p__Chlamydiae|c__Chlamydiia|o__Chlamydiales|f__Chlamydiaceae|-__Chlamydia/Chlamydophila_group|g__Chlamydia|s__Chlamydia_abortus
NZ_FQSZ01000002.1:3949-6601	gi|1196970918|ref|WP_086393221.1|	99.89	879	1	0	17	2653	1	879	0	1758.4	WP_086393221.1	endonuclease [Chlamydia abortus]	886	live	83555	2017-05-24	2017-05-24		Chlamydia abortus	Bacteria	1	NZ_FQSZ01000002.1:3965-6625	NZ_FQSZ01000002.1	Chlamydia abortus strain S3_3, whole genome shotgun sequence	8191	L1P1_orf2	nr	bacteria	|-__root|-__cellular_organisms|k__Bacteria|-__PVC_group|p__Chlamydiae|c__Chlamydiia|o__Chlamydiales|f__Chlamydiaceae|-__Chlamydia/Chlamydophila_group|g__Chlamydia|s__Chlamydia_abortus
NZ_FPIJ01000028.1:709-1403	gi|1196970919|ref|WP_086393222.1|	98.72	156	2	0	211	678	1	156	8e-89	334.7	WP_086393222.1	DUF1725 domain-containing protein [Chlamydia abortus]	156	live	83555	2017-05-24	2017-07-10		Chlamydia abortus	Bacteria	1	NZ_FQSZ01000002.1:7602-8072	NZ_FQSZ01000002.1	Chlamydia abortus strain S3_3, whole genome shotgun sequence	8191	L1HS_3end	nr	bacteria	|-__root|-__cellular_organisms|k__Bacteria|-__PVC_group|p__Chlamydiae|c__Chlamydiia|o__Chlamydiales|f__Chlamydiaceae|-__Chlamydia/Chlamydophila_group|g__Chlamydia|s__Chlamydia_abortus
NZ_JHOK01000044.1:520-686	gi|1037158362|embl|SBT51423.1|	95.92	49	2	0	158	12	1	49	3e-20	105.5	SBT51423.1	STP1 protein [Plasmodium ovale wallikeri]	926	live	864142	2016-06-16	2016-06-16		Plasmodium ovale wallikeri	Eukaryota	1	FLRE01000229.1:1-3261	FLRE01000229.1	Plasmodium ovale wallikeri genome assembly, contig: contig229, whole genome shotgun sequence	7550	HSATII	nr	bacteria	|-__root|-__cellular_organisms|k__Eukaryota|-__Alveolata|p__Apicomplexa|c__Aconoidasida|o__Haemosporida|f__Plasmodiidae|g__Plasmodium|-__Plasmodium_(Plasmodium)|s__Plasmodium_ovale|-__Plasmodium_ovale_wallikeri
NZ_LZSC01000001.1:2017-5310	gi|1037467288|gb|OBA65061.1|	99.89	931	1	0	502	3294	1	931	0	1875.9	OBA65061.1	endonuclease [Mycobacterium sp. 1100029.7]	1108	live	1834067	2016-06-17	2016-06-17		Mycobacterium sp. 1100029.7	Bacteria	1	LZSC01000001.1:2518-5844	LZSC01000001.1	Mycobacterium sp. 1100029.7 contig_1, whole genome shotgun sequence	7387	L1P1_orf2	nr	bacteria	|-__root|-__cellular_organisms|k__Bacteria|-__Terrabacteria_group|p__Actinobacteria|c__Actinobacteria|o__Corynebacteriales|f__Mycobacteriaceae|g__Mycobacterium|s__Mycobacterium_sp._1100029.7
NZ_FTZV01000294.1:1314-3058	gi|1178440013|ref|WP_082962389.1|	99.11	338	3	0	1230	217	1	338	2e-178	634.8	WP_082962389.1	hypothetical protein [Mycobacterium sp. 1100029.7]	338	live	1834067	2017-04-13	2017-04-13		Mycobacterium sp. 1100029.7	Bacteria	1	NZ_LZSC01000001.1:937-1953	NZ_LZSC01000001.1	Mycobacterium sp. 1100029.7 contig_1, whole genome shotgun sequence	7387	L1HS_5end	nr	bacteria	|-__root|-__cellular_organisms|k__Bacteria|-__Terrabacteria_group|p__Actinobacteria|c__Actinobacteria|o__Corynebacteriales|f__Mycobacteriaceae|g__Mycobacterium|s__Mycobacterium_sp._1100029.7
NZ_LZSC01000001.1:2017-5310	gi|1178440015|ref|WP_082962391.1|	100	1098	0	0	1	3294	1	1098	0	2213.3	WP_082962391.1	DUF1725 domain-containing protein [Mycobacterium sp. 1100029.7]	1275	live	1834067	2017-04-13	2017-12-11		Mycobacterium sp. 1100029.7	Bacteria	1	NZ_LZSC01000001.1:2017-5844	NZ_LZSC01000001.1	Mycobacterium sp. 1100029.7 contig_1, whole genome shotgun sequence	7387	L1P1_orf2	nr	bacteria	|-__root|-__cellular_organisms|k__Bacteria|-__Terrabacteria_group|p__Actinobacteria|c__Actinobacteria|o__Corynebacteriales|f__Mycobacteriaceae|g__Mycobacterium|s__Mycobacterium_sp._1100029.7
NZ_FPIK01000009.1:93-776	gi|815045574|embl|CRH55758.1|	97.37	76	2	0	683	456	130	205	8e-33	148.7	CRH55758.1	L1 transposable element [Chlamydia trachomatis]	214	live	813	2015-04-22	2015-06-13		Chlamydia trachomatis	Bacteria	1	CVNU01000037.1:521-1165	CVNU01000037.1	Chlamydia trachomatis genome assembly 7501_6#59, scaffold ERS082928SCcontig000037, whole genome shotgun sequence	6858	L1PBa_5end	nr	bacteria	|-__root|-__cellular_organisms|k__Bacteria|-__PVC_group|p__Chlamydiae|c__Chlamydiia|o__Chlamydiales|f__Chlamydiaceae|-__Chlamydia/Chlamydophila_group|g__Chlamydia|s__Chlamydia_trachomatis
NZ_FPIK01000013.1:4819-5850	gi|815045576|embl|CRH55760.1|	100	183	0	0	1	549	9	191	9e-101	375.6	CRH55760.1	exonuclease III [Chlamydia trachomatis]	204	live	813	2015-04-22	2015-06-13		Chlamydia trachomatis	Bacteria	1	CVNU01000037.1:2762-3376	CVNU01000037.1	Chlamydia trachomatis genome assembly 7501_6#59, scaffold ERS082928SCcontig000037, whole genome shotgun sequence	6858	L1P1_orf2	nr	bacteria	|-__root|-__cellular_organisms|k__Bacteria|-__PVC_group|p__Chlamydiae|c__Chlamydiia|o__Chlamydiales|f__Chlamydiaceae|-__Chlamydia/Chlamydophila_group|g__Chlamydia|s__Chlamydia_trachomatis
NZ_FPIK01000009.1:93-776	gi|815045577|embl|CRH55761.1|	97.47	79	2	0	683	447	130	208	9e-34	151.8	CRH55761.1	L1 transposable element [Chlamydia trachomatis]	217	live	813	2015-04-22	2015-06-13		Chlamydia trachomatis	Bacteria	1	CVNU01000037.1:3674-4327	CVNU01000037.1	Chlamydia trachomatis genome assembly 7501_6#59, scaffold ERS082928SCcontig000037, whole genome shotgun sequence	6858	L1PBa_5end	nr	bacteria	|-__root|-__cellular_organisms|k__Bacteria|-__PVC_group|p__Chlamydiae|c__Chlamydiia|o__Chlamydiales|f__Chlamydiaceae|-__Chlamydia/Chlamydophila_group|g__Chlamydia|s__Chlamydia_trachomatis
NZ_FPIJ01000009.1:1501-2185	gi|815045578|embl|CRH55762.1|	96.92	195	6	0	3	587	27	221	1e-101	377.1	CRH55762.1	L1 transposable element [Chlamydia trachomatis]	247	live	813	2015-04-22	2015-06-13		Chlamydia trachomatis	Bacteria	1	CVNU01000037.1:4375-5118	CVNU01000037.1	Chlamydia trachomatis genome assembly 7501_6#59, scaffold ERS082928SCcontig000037, whole genome shotgun sequence	6858	L1PBa_5end	nr	bacteria	|-__root|-__cellular_organisms|k__Bacteria|-__PVC_group|p__Chlamydiae|c__Chlamydiia|o__Chlamydiales|f__Chlamydiaceae|-__Chlamydia/Chlamydophila_group|g__Chlamydia|s__Chlamydia_trachomatis
NZ_FPLU01000003.1:89-926	gi|1190727247|embl|SGA30850.1|	99.12	227	2	0	838	158	60	286	2e-134	486.9	SGA30850.1	Retron-type reverse transcriptase [Chlamydia abortus]	286	live	83555	2017-05-10	2017-05-10		Chlamydia abortus	Bacteria	1	FPMU01000006.1:220-1080	FPMU01000006.1	Chlamydia abortus strain 03DC36 genome assembly, contig: ERS067054SCcontig000006, whole genome shotgun sequence	6852	L1HS_3end	nr	bacteria	|-__root|-__cellular_organisms|k__Bacteria|-__PVC_group|p__Chlamydiae|c__Chlamydiia|o__Chlamydiales|f__Chlamydiaceae|-__Chlamydia/Chlamydophila_group|g__Chlamydia|s__Chlamydia_abortus
NZ_FPMI01000004.1:66-3359	gi|1190727248|embl|SGA30856.1|	99.62	791	3	0	3294	922	1	791	0	1563.1	SGA30856.1	exonuclease III [Chlamydia abortus]	1290	live	83555	2017-05-10	2017-05-10		Chlamydia abortus	Bacteria	1	FPMU01000006.1:1214-5086	FPMU01000006.1	Chlamydia abortus strain 03DC36 genome assembly, contig: ERS067054SCcontig000006, whole genome shotgun sequence	6852	L1P1_orf2	nr	bacteria	|-__root|-__cellular_organisms|k__Bacteria|-__PVC_group|p__Chlamydiae|c__Chlamydiia|o__Chlamydiales|f__Chlamydiaceae|-__Chlamydia/Chlamydophila_group|g__Chlamydia|s__Chlamydia_abortus
NZ_FTZV01000200.1:480-645	gi|1137039401|embl|SJG81226.1|	100	41	0	0	2	124	6	46	1e-15	90.1	SJG81226.1	Uncharacterised protein [Shigella sonnei]	46	live	624	2017-01-28	2017-01-28		Shigella sonnei	Bacteria	1	FTZV01000200.1:466-606	FTZV01000200.1	Shigella sonnei strain sh1364 genome assembly, contig: ERS158000SCcontig000200, whole genome shotgun sequence	6817	HSATII	nr	bacteria	|-__root|-__cellular_organisms|k__Bacteria|p__Proteobacteria|c__Gammaproteobacteria|o__Enterobacterales|f__Enterobacteriaceae|g__Shigella|s__Shigella_sonnei
NZ_FTZV01000200.1:2962-3128	gi|1137039407|embl|SJG81368.1|	100	35	0	0	33	137	1	35	2e-12	79.3	SJG81368.1	Uncharacterised protein [Shigella sonnei]	35	live	624	2017-01-28	2017-01-28		Shigella sonnei	Bacteria	1	FTZV01000200.1:2994-3101	FTZV01000200.1	Shigella sonnei strain sh1364 genome assembly, contig: ERS158000SCcontig000200, whole genome shotgun sequence	6817	HSATII	nr	bacteria	|-__root|-__cellular_organisms|k__Bacteria|p__Proteobacteria|c__Gammaproteobacteria|o__Enterobacterales|f__Enterobacteriaceae|g__Shigella|s__Shigella_sonnei
NZ_FTZV01000200.1:4459-4628	gi|1137039410|embl|SJG81432.1|	100	56	0	0	2	169	19	74	7e-26	124	SJG81432.1	Uncharacterised protein [Shigella sonnei]	95	live	624	2017-01-28	2017-01-28		Shigella sonnei	Bacteria	1	FTZV01000200.1:4406-4693	FTZV01000200.1	Shigella sonnei strain sh1364 genome assembly, contig: ERS158000SCcontig000200, whole genome shotgun sequence	6817	HSATII	nr	bacteria	|-__root|-__cellular_organisms|k__Bacteria|p__Proteobacteria|c__Gammaproteobacteria|o__Enterobacterales|f__Enterobacteriaceae|g__Shigella|s__Shigella_sonnei
NZ_FVQV01000049.1:105-279	gi|1137039413|embl|SJG81511.1|	100	50	0	0	9	158	1	50	1e-21	110.2	SJG81511.1	Uncharacterised protein [Shigella sonnei]	50	live	624	2017-01-28	2017-01-28		Shigella sonnei	Bacteria	1	FTZV01000200.1:5531-5683	FTZV01000200.1	Shigella sonnei strain sh1364 genome assembly, contig: ERS158000SCcontig000200, whole genome shotgun sequence	6817	HSATII	nr	bacteria	|-__root|-__cellular_organisms|k__Bacteria|p__Proteobacteria|c__Gammaproteobacteria|o__Enterobacterales|f__Enterobacteriaceae|g__Shigella|s__Shigella_sonnei
NZ_PZRW01000026.1:397-567	gi|1137039417|embl|SJG81623.1|	100	38	0	0	115	2	1	38	1e-15	90.1	SJG81623.1	Uncharacterised protein [Shigella sonnei]	50	live	624	2017-01-28	2017-01-28		Shigella sonnei	Bacteria	1	FTZV01000200.1:6458-6610	FTZV01000200.1	Shigella sonnei strain sh1364 genome assembly, contig: ERS158000SCcontig000200, whole genome shotgun sequence	6817	HSATII	nr	bacteria	|-__root|-__cellular_organisms|k__Bacteria|p__Proteobacteria|c__Gammaproteobacteria|o__Enterobacterales|f__Enterobacteriaceae|g__Shigella|s__Shigella_sonnei
NZ_FTZV01000200.1:6670-6817	gi|1137039419|embl|SJG81675.1|	100	35	0	0	2	106	6	40	4e-13	81.6	SJG81675.1	Uncharacterised protein [Shigella sonnei]	40	live	624	2017-01-28	2017-01-28		Shigella sonnei	Bacteria	1	FTZV01000200.1:6656-6778	FTZV01000200.1	Shigella sonnei strain sh1364 genome assembly, contig: ERS158000SCcontig000200, whole genome shotgun sequence	6817	HSATII	nr	bacteria	|-__root|-__cellular_organisms|k__Bacteria|p__Proteobacteria|c__Gammaproteobacteria|o__Enterobacterales|f__Enterobacteriaceae|g__Shigella|s__Shigella_sonnei
NZ_QLYV01000095.1:1371-1536	gi|1143202202|ref|WP_077128844.1|	100	55	0	0	2	166	36	103	5e-24	117.9	WP_077128844.1	hypothetical protein [Shigella sonnei]	121	suppressed	624	2017-02-08	2018-01-11	This protein record was suppressed because it is no longer annotated on any genome	Shigella sonnei	Bacteria	1	FTZV01000200.1:1813-2178	FTZV01000200.1	Shigella sonnei strain sh1364 genome assembly, contig: ERS158000SCcontig000200, whole genome shotgun sequence	6817	HSATII	nr	bacteria	|-__root|-__cellular_organisms|k__Bacteria|p__Proteobacteria|c__Gammaproteobacteria|o__Enterobacterales|f__Enterobacteriaceae|g__Shigella|s__Shigella_sonnei
NZ_MOOL01000001.1:1-383	gi|1190669974|embl|SGA03451.1|	100	75	0	0	33	257	1	75	3e-35	155.6	SGA03451.1	Uncharacterised protein [Chlamydia abortus]	75	live	83555	2017-05-10	2017-05-10		Chlamydia abortus	Bacteria	1	FPLT01000002.1:3388-3615	FPLT01000002.1	Chlamydia abortus strain 08DC62 genome assembly, contig: ERS067056SCcontig000002, whole genome shotgun sequence	6682	L1P1_orf2	nr	bacteria	|-__root|-__cellular_organisms|k__Bacteria|-__PVC_group|p__Chlamydiae|c__Chlamydiia|o__Chlamydiales|f__Chlamydiaceae|-__Chlamydia/Chlamydophila_group|g__Chlamydia|s__Chlamydia_abortus
NZ_LONH01000058.1:2101-5394	gi|1205106452|ref|WP_087813239.1|	97.09	1098	32	0	1	3294	1	1098	0	2157.9	WP_087813239.1	DUF1725 domain-containing protein [Mycobacterium tuberculosis]	1275	live	1773	2017-06-12	2017-12-11		Mycobacterium tuberculosis	Bacteria	1	NZ_FMDE03000213.1:500-4327	NZ_FMDE03000213.1	Mycobacterium tuberculosis isolate MTB2_M, whole genome shotgun sequence	6590	L1P1_orf2	nr	bacteria	|-__root|-__cellular_organisms|k__Bacteria|-__Terrabacteria_group|p__Actinobacteria|c__Actinobacteria|o__Corynebacteriales|f__Mycobacteriaceae|g__Mycobacterium|-__Mycobacterium_tuberculosis_complex|s__Mycobacterium_tuberculosis
NZ_LPSC01000038.1:1-327	gi|1205106453|ref|WP_087813240.1|	99.08	109	1	0	1	327	204	312	2e-53	215.7	WP_087813240.1	hypothetical protein [Mycobacterium tuberculosis]	338	live	1773	2017-06-12	2017-06-12		Mycobacterium tuberculosis	Bacteria	1	NZ_FMDE03000213.1:4391-5407	NZ_FMDE03000213.1	Mycobacterium tuberculosis isolate MTB2_M, whole genome shotgun sequence	6590	L1HS_5end	nr	archaea	|-__root|-__cellular_organisms|k__Bacteria|-__Terrabacteria_group|p__Actinobacteria|c__Actinobacteria|o__Corynebacteriales|f__Mycobacteriaceae|g__Mycobacterium|-__Mycobacterium_tuberculosis_complex|s__Mycobacterium_tuberculosis
NZ_CZJT01000051.1:698-3990	gi|1180961911|ref|WP_084382029.1|	100	1000	0	0	3000	1	1	1000	0	2014.6	WP_084382029.1	DUF1725 domain-containing protein [Paeniglutamicibacter antarcticus]	1177	live	494023	2017-04-17	2017-12-14		Paeniglutamicibacter antarcticus	Bacteria	1	NZ_CZJT01000051.1:164-3697	NZ_CZJT01000051.1	Paeniglutamicibacter antarcticus strain W2, whole genome shotgun sequence	6443	L1P1_orf2	nr	bacteria	|-__root|-__cellular_organisms|k__Bacteria|-__Terrabacteria_group|p__Actinobacteria|c__Actinobacteria|o__Micrococcales|f__Micrococcaceae|g__Paeniglutamicibacter|s__Paeniglutamicibacter_antarcticus
NZ_FPIJ01000012.1:1161-3588	gi|1190713205|embl|SFW05838.1|	100	807	0	0	8	2428	317	1123	0	1606.7	SFW05838.1	Retron-type reverse transcriptase [Chlamydia abortus]	1468	live	83555	2017-05-10	2017-05-10		Chlamydia abortus	Bacteria	1	FPIJ01000012.1:220-4626	FPIJ01000012.1	Chlamydophila abortus strain T20 genome assembly, contig: ERS003308SCcontig000012, whole genome shotgun sequence	6427	L1P1_orf2	nr	bacteria	|-__root|-__cellular_organisms|k__Bacteria|-__PVC_group|p__Chlamydiae|c__Chlamydiia|o__Chlamydiales|f__Chlamydiaceae|-__Chlamydia/Chlamydophila_group|g__Chlamydia|s__Chlamydia_abortus
NZ_CVNK01000005.1:111-809	gi|1190713206|embl|SFW05840.1|	100	225	0	0	699	25	69	293	1e-131	476.9	SFW05840.1	Retron-type reverse transcriptase [Chlamydia abortus]	304	live	83555	2017-05-10	2017-05-10		Chlamydia abortus	Bacteria	1	FPIJ01000012.1:4723-5637	FPIJ01000012.1	Chlamydophila abortus strain T20 genome assembly, contig: ERS003308SCcontig000012, whole genome shotgun sequence	6427	L1HS_3end	nr	bacteria	|-__root|-__cellular_organisms|k__Bacteria|-__PVC_group|p__Chlamydiae|c__Chlamydiia|o__Chlamydiales|f__Chlamydiaceae|-__Chlamydia/Chlamydophila_group|g__Chlamydia|s__Chlamydia_abortus
NZ_CVNK01000005.1:111-809	gi|1196979758|ref|WP_086400416.1|	100	155	0	0	489	25	1	155	2e-89	337	WP_086400416.1	DUF1725 domain-containing protein [Chlamydia abortus]	166	live	83555	2017-05-24	2017-07-08		Chlamydia abortus	Bacteria	1	NZ_FPIJ01000012.1:5137-5637	NZ_FPIJ01000012.1	Chlamydia abortus strain T20, whole genome shotgun sequence	6427	L1HS_3end	nr	bacteria	|-__root|-__cellular_organisms|k__Bacteria|-__PVC_group|p__Chlamydiae|c__Chlamydiia|o__Chlamydiales|f__Chlamydiaceae|-__Chlamydia/Chlamydophila_group|g__Chlamydia|s__Chlamydia_abortus
NZ_QLYV01000095.1:1371-1536	gi|1061384925|ref|WP_069187498.1|	100	55	0	0	2	166	47	114	5e-24	117.9	WP_069187498.1	hypothetical protein [Streptococcus pneumoniae]	132	live	1313	2016-09-01	2016-09-01		Streptococcus pneumoniae	Bacteria	8	NZ_CGZQ01000049.1:3533-3931,NZ_CKYY01000054.1:687-1085,NZ_CMHF01000059.1:1225-1623,NZ_CMKS01000050.1:4034-4432,CKYY01000054.1:687-1085,CGZQ01000049.1:3533-3931,CMHF01000059.1:1225-1623,CMKS01000050.1:4034-4432	NZ_CGZQ01000049.1	Streptococcus pneumoniae strain SMRU2282, whole genome shotgun sequence	6426	HSATII	nr	bacteria	|-__root|-__cellular_organisms|k__Bacteria|-__Terrabacteria_group|p__Firmicutes|c__Bacilli|o__Lactobacillales|f__Streptococcaceae|g__Streptococcus|s__Streptococcus_pneumoniae
NZ_QLYV01000095.1:2544-2710	gi|545617220|ref|WP_021741101.1|	100	52	0	0	10	165	1	52	9e-24	117.1	WP_021741101.1	hypothetical protein [Streptococcus pneumoniae]	60	live	1313	2013-09-24	2015-08-07		Streptococcus pneumoniae	Bacteria	9	NZ_CGZQ01000049.1:2293-2475,NZ_CKYY01000039.1:197-379,NZ_CMKS01000050.1:2892-3074,CKYY01000039.1:197-379,CGZQ01000049.1:2293-2475,CMKS01000050.1:2892-3074,CQSC01000353.1:105-287,AWVK01000010.1:13-195,KI271212.1:13-195	NZ_CGZQ01000049.1	Streptococcus pneumoniae strain SMRU2282, whole genome shotgun sequence	6426	HSATII	nr	bacteria	|-__root|-__cellular_organisms|k__Bacteria|-__Terrabacteria_group|p__Firmicutes|c__Bacilli|o__Lactobacillales|f__Streptococcaceae|g__Streptococcus|s__Streptococcus_pneumoniae
NZ_CMHF01000056.1:1914-2077	gi|809852566|embl|CJS60795.1|	100	42	0	0	36	161	1	42	2e-16	92.4	CJS60795.1	Uncharacterised protein [Streptococcus pneumoniae]	48	live	1313	2015-04-21	2015-06-14		Streptococcus pneumoniae	Bacteria	7	CGZQ01000049.1:583-729,CKYY01000039.1:1943-2089,CLCE01000362.1:1387-1533,CMHC01000050.1:450-596,CMKS01000050.1:1182-1328,FECI01000032.1:178-324,FTZV01000200.1:5410-5556	CGZQ01000049.1	Streptococcus pneumoniae genome assembly 6983_4#74, scaffold ERS021791SCcontig000049, whole genome shotgun sequence	6426	HSATII	nr	bacteria	|-__root|-__cellular_organisms|k__Bacteria|-__Terrabacteria_group|p__Firmicutes|c__Bacilli|o__Lactobacillales|f__Streptococcaceae|g__Streptococcus|s__Streptococcus_pneumoniae
NZ_QLYV01000095.1:3348-3517	gi|809852567|embl|CJS60824.1|	100	50	0	0	20	169	1	50	4e-22	111.7	CJS60824.1	Uncharacterised protein [Streptococcus pneumoniae]	71	live	1313	2015-04-21	2015-06-14		Streptococcus pneumoniae	Bacteria	3	CGZQ01000049.1:1446-1661,CKYY01000039.1:1011-1226,CLCE01000362.1:2250-2465	CGZQ01000049.1	Streptococcus pneumoniae genome assembly 6983_4#74, scaffold ERS021791SCcontig000049, whole genome shotgun sequence	6426	HSATII	nr	bacteria	|-__root|-__cellular_organisms|k__Bacteria|-__Terrabacteria_group|p__Firmicutes|c__Bacilli|o__Lactobacillales|f__Streptococcaceae|g__Streptococcus|s__Streptococcus_pneumoniae
NZ_CSAF01000431.1:337-499	gi|809852570|embl|CJS60895.1|	100	35	0	0	58	162	1	35	1e-12	80.1	CJS60895.1	Uncharacterised protein [Streptococcus pneumoniae]	41	live	1313	2015-04-21	2015-06-14		Streptococcus pneumoniae	Bacteria	3	CGZQ01000049.1:2465-2590,CKYY01000039.1:82-207,CMKS01000050.1:3064-3189	CGZQ01000049.1	Streptococcus pneumoniae genome assembly 6983_4#74, scaffold ERS021791SCcontig000049, whole genome shotgun sequence	6426	HSATII	nr	bacteria	|-__root|-__cellular_organisms|k__Bacteria|-__Terrabacteria_group|p__Firmicutes|c__Bacilli|o__Lactobacillales|f__Streptococcaceae|g__Streptococcus|s__Streptococcus_pneumoniae
NZ_QLYV01000095.1:2181-2327	gi|809852571|embl|CJS60912.1|	100	32	0	0	16	111	1	32	2e-10	72.4	CJS60912.1	Uncharacterised protein [Streptococcus pneumoniae]	32	live	1313	2015-04-21	2015-06-14		Streptococcus pneumoniae	Bacteria	3	CGZQ01000049.1:2734-2832,CMHF01000059.1:2226-2324,CMKS01000050.1:3333-3431	CGZQ01000049.1	Streptococcus pneumoniae genome assembly 6983_4#74, scaffold ERS021791SCcontig000049, whole genome shotgun sequence	6426	HSATII	nr	bacteria	|-__root|-__cellular_organisms|k__Bacteria|-__Terrabacteria_group|p__Firmicutes|c__Bacilli|o__Lactobacillales|f__Streptococcaceae|g__Streptococcus|s__Streptococcus_pneumoniae
NZ_AMQV01000127.1:136-294	gi|809852572|embl|CJS60931.1|	100	38	0	0	2	115	19	56	4e-14	85.1	CJS60931.1	Uncharacterised protein [Streptococcus pneumoniae]	56	live	1313	2015-04-21	2015-06-14		Streptococcus pneumoniae	Bacteria	6	CGZQ01000049.1:2786-2956,CMHF01000059.1:2102-2272,CMKS01000050.1:3385-3555,CQTE01000309.1:242-412,FTZV01000200.1:2487-2657,FTZV01000200.1:3399-3569	CGZQ01000049.1	Streptococcus pneumoniae genome assembly 6983_4#74, scaffold ERS021791SCcontig000049, whole genome shotgun sequence	6426	HSATII	nr	bacteria	|-__root|-__cellular_organisms|k__Bacteria|-__Terrabacteria_group|p__Firmicutes|c__Bacilli|o__Lactobacillales|f__Streptococcaceae|g__Streptococcus|s__Streptococcus_pneumoniae
NZ_CQSC01000305.1:125-289	gi|809852575|embl|CJS60998.1|	100	41	0	0	1	123	6	46	3e-16	92	CJS60998.1	Uncharacterised protein [Streptococcus pneumoniae]	46	live	1313	2015-04-21	2015-06-14		Streptococcus pneumoniae	Bacteria	1	CGZQ01000049.1:5105-5245	CGZQ01000049.1	Streptococcus pneumoniae genome assembly 6983_4#74, scaffold ERS021791SCcontig000049, whole genome shotgun sequence	6426	HSATII	nr	bacteria	|-__root|-__cellular_organisms|k__Bacteria|-__Terrabacteria_group|p__Firmicutes|c__Bacilli|o__Lactobacillales|f__Streptococcaceae|g__Streptococcus|s__Streptococcus_pneumoniae
NZ_CQTE01000215.1:1772-1937	gi|809852576|embl|CJS61020.1|	100	55	0	0	2	166	21	75	1e-24	119.8	CJS61020.1	Uncharacterised protein [Streptococcus pneumoniae]	112	live	1313	2015-04-21	2015-06-14		Streptococcus pneumoniae	Bacteria	1	CGZQ01000049.1:5236-5574	CGZQ01000049.1	Streptococcus pneumoniae genome assembly 6983_4#74, scaffold ERS021791SCcontig000049, whole genome shotgun sequence	6426	HSATII	nr	bacteria	|-__root|-__cellular_organisms|k__Bacteria|-__Terrabacteria_group|p__Firmicutes|c__Bacilli|o__Lactobacillales|f__Streptococcaceae|g__Streptococcus|s__Streptococcus_pneumoniae
NZ_LZSC01000039.1:670-822	gi|809852577|embl|CJS61039.1|	100	40	0	0	144	25	1	40	2e-15	89	CJS61039.1	Uncharacterised protein [Streptococcus pneumoniae]	40	live	1313	2015-04-21	2015-06-14		Streptococcus pneumoniae	Bacteria	5	CGZQ01000049.1:5668-5790,CKYY01000039.1:3092-3214,CMHF01000056.1:3235-3357,CMKS01000050.1:30-152,FTZV01000200.1:6559-6681	CGZQ01000049.1	Streptococcus pneumoniae genome assembly 6983_4#74, scaffold ERS021791SCcontig000049, whole genome shotgun sequence	6426	HSATII	nr	bacteria	|-__root|-__cellular_organisms|k__Bacteria|-__Terrabacteria_group|p__Firmicutes|c__Bacilli|o__Lactobacillales|f__Streptococcaceae|g__Streptococcus|s__Streptococcus_pneumoniae
NZ_PZRW01000026.1:397-567	gi|809852578|embl|CJS61057.1|	100	51	0	0	154	2	1	51	1e-23	116.7	CJS61057.1	Uncharacterised protein [Streptococcus pneumoniae]	63	live	1313	2015-04-21	2015-06-14		Streptococcus pneumoniae	Bacteria	2	CGZQ01000049.1:5739-5930,CKYY01000039.1:2952-3143	CGZQ01000049.1	Streptococcus pneumoniae genome assembly 6983_4#74, scaffold ERS021791SCcontig000049, whole genome shotgun sequence	6426	HSATII	nr	bacteria	|-__root|-__cellular_organisms|k__Bacteria|-__Terrabacteria_group|p__Firmicutes|c__Bacilli|o__Lactobacillales|f__Streptococcaceae|g__Streptococcus|s__Streptococcus_pneumoniae
NZ_LPSC01000028.1:519-683	gi|809852580|embl|CJS61107.1|	95.56	45	2	0	1	135	1	45	3e-18	98.6	CJS61107.1	Uncharacterised protein [Streptococcus pneumoniae]	45	live	1313	2015-04-21	2015-06-14		Streptococcus pneumoniae	Bacteria	1	CGZQ01000049.1:6199-6336	CGZQ01000049.1	Streptococcus pneumoniae genome assembly 6983_4#74, scaffold ERS021791SCcontig000049, whole genome shotgun sequence	6426	HSATII	nr	archaea	|-__root|-__cellular_organisms|k__Bacteria|-__Terrabacteria_group|p__Firmicutes|c__Bacilli|o__Lactobacillales|f__Streptococcaceae|g__Streptococcus|s__Streptococcus_pneumoniae
NZ_FTZV01000200.1:2567-2742	gi|912654299|ref|WP_050218427.1|	100	46	0	0	3	140	36	81	5e-19	101.3	WP_050218427.1	MULTISPECIES: hypothetical protein [Bacteria]	81	live	2	2015-08-05	2017-02-09		Bacteria	Bacteria	4	NZ_CGZQ01000049.1:2734-2979,NZ_CMHF01000059.1:2079-2324,NZ_CMKS01000050.1:3333-3578,NZ_FTZV01000200.1:2464-2709	NZ_CGZQ01000049.1	Streptococcus pneumoniae strain SMRU2282, whole genome shotgun sequence	6426	HSATII	nr	bacteria	|-__root|-__cellular_organisms|k__Bacteria
NZ_QLYV01000095.1:3348-3517	gi|912673038|ref|WP_050226854.1|	100	56	0	0	2	169	6	61	4e-26	124.8	WP_050226854.1	hypothetical protein [Streptococcus pneumoniae]	82	live	1313	2015-08-05	2015-08-05		Streptococcus pneumoniae	Bacteria	3	NZ_CGZQ01000049.1:1446-1694,NZ_CKYY01000039.1:978-1226,NZ_CMKS01000050.1:2045-2293	NZ_CGZQ01000049.1	Streptococcus pneumoniae strain SMRU2282, whole genome shotgun sequence	6426	HSATII	nr	bacteria	|-__root|-__cellular_organisms|k__Bacteria|-__Terrabacteria_group|p__Firmicutes|c__Bacilli|o__Lactobacillales|f__Streptococcaceae|g__Streptococcus|s__Streptococcus_pneumoniae
NZ_JPWZ01000241.1:397-569	gi|913376254|ref|WP_050389103.1|	100	57	0	0	171	1	15	71	3e-24	118.6	WP_050389103.1	MULTISPECIES: hypothetical protein [Bacteria]	82	live	2	2015-08-06	2016-12-11		Bacteria	Bacteria	16	NZ_CGZQ01000049.1:2011-2259,NZ_CKYY01000039.1:413-661,NZ_CMKS01000050.1:2610-2858,NZ_FTZV01000200.1:3880-4128,NZ_JUHZ01000079.1:280-528,NZ_LZRJ01000116.1:122-370,CKYY01000039.1:413-661,CLCE01000362.1:2815-3063,CGZQ01000049.1:2011-2259,CMHF01000056.1:131-379,CMKS01000050.1:2610-2858,CQTE01000319.1:215-463,CSAF01000474.1:117-365,LZRJ01000116.1:122-370,FSLH01000049.1:155-403,FTZV01000200.1:3880-4128	NZ_CGZQ01000049.1	Streptococcus pneumoniae strain SMRU2282, whole genome shotgun sequence	6426	HSATII	nr	bacteria	|-__root|-__cellular_organisms|k__Bacteria
NZ_LPSC01000035.1:15-188	gi|951098010|ref|WP_057589215.1|	100	40	0	0	13	132	20	59	6e-17	94.4	WP_057589215.1	MULTISPECIES: hypothetical protein [Bacteria]	59	live	2	2015-11-10	2017-02-09		Bacteria	Bacteria	8	NZ_CGZQ01000049.1:4237-4416,NZ_FTZV01000200.1:1295-1474,CGZQ01000049.1:4237-4416,CMHF01000059.1:740-919,CMKS01000050.1:4738-4917,CQTE01000215.1:2871-3050,CSAF01000398.1:98-277,FTZV01000200.1:1295-1474	NZ_CGZQ01000049.1	Streptococcus pneumoniae strain SMRU2282, whole genome shotgun sequence	6426	HSATII	nr	archaea	|-__root|-__cellular_organisms|k__Bacteria
NZ_CVND01000042.1:5983-6323	gi|809292584|embl|CRH27300.1|	100	37	0	0	111	1	1	37	6e-14	84.7	CRH27300.1	Uncharacterised protein [Chlamydia trachomatis]	71	live	813	2015-04-21	2015-06-13		Chlamydia trachomatis	Bacteria	1	CVND01000042.1:5878-6093	CVND01000042.1	Chlamydia trachomatis genome assembly 7054_3#88, scaffold ERS066955SCcontig000042, whole genome shotgun sequence	6396	L1P1_orf2	nr	bacteria	|-__root|-__cellular_organisms|k__Bacteria|-__PVC_group|p__Chlamydiae|c__Chlamydiia|o__Chlamydiales|f__Chlamydiaceae|-__Chlamydia/Chlamydophila_group|g__Chlamydia|s__Chlamydia_trachomatis
NZ_CVND01000042.1:1167-1591	gi|942535259|ref|WP_055348856.1|	100	58	0	0	3	176	22	79	3e-16	92.4	WP_055348856.1	hypothetical protein [Chlamydia trachomatis]	79	live	813	2015-10-27	2015-10-27		Chlamydia trachomatis	Bacteria	1	NZ_CVND01000042.1:1106-1345	NZ_CVND01000042.1	Chlamydia trachomatis strain LGV1339, whole genome shotgun sequence	6396	L1P1_orf2	nr	bacteria	|-__root|-__cellular_organisms|k__Bacteria|-__PVC_group|p__Chlamydiae|c__Chlamydiia|o__Chlamydiales|f__Chlamydiaceae|-__Chlamydia/Chlamydophila_group|g__Chlamydia|s__Chlamydia_trachomatis
NZ_CVND01000042.1:5983-6323	gi|942535263|ref|WP_055348858.1|	100	87	0	0	34	294	1	87	3e-42	178.7	WP_055348858.1	hypothetical protein [Chlamydia trachomatis]	87	live	813	2015-10-27	2018-01-12		Chlamydia trachomatis	Bacteria	1	NZ_CVND01000042.1:6016-6279	NZ_CVND01000042.1	Chlamydia trachomatis strain LGV1339, whole genome shotgun sequence	6396	L1P1_orf2	nr	bacteria	|-__root|-__cellular_organisms|k__Bacteria|-__PVC_group|p__Chlamydiae|c__Chlamydiia|o__Chlamydiales|f__Chlamydiaceae|-__Chlamydia/Chlamydophila_group|g__Chlamydia|s__Chlamydia_trachomatis
NZ_CMKS01000050.1:139-308	gi|884051339|embl|CKC05495.1|	100	51	0	0	154	2	1	51	8e-23	114	CKC05495.1	Uncharacterised protein [Streptococcus pneumoniae]	63	live	1313	2015-03-23	2015-06-13		Streptococcus pneumoniae	Bacteria	1	CMKS01000050.1:101-292	CMKS01000050.1	Streptococcus pneumoniae genome assembly 7054_4#6, scaffold ERS022540SCcontig000050, whole genome shotgun sequence	6358	HSATII	nr	bacteria	|-__root|-__cellular_organisms|k__Bacteria|-__Terrabacteria_group|p__Firmicutes|c__Bacilli|o__Lactobacillales|f__Streptococcaceae|g__Streptococcus|s__Streptococcus_pneumoniae
NZ_QLYV01000095.1:3348-3517	gi|884051344|embl|CKC05611.1|	100	56	0	0	2	169	19	74	4e-26	124.8	CKC05611.1	Uncharacterised protein [Streptococcus pneumoniae]	95	live	1313	2015-03-23	2015-06-13		Streptococcus pneumoniae	Bacteria	1	CMKS01000050.1:2045-2332	CMKS01000050.1	Streptococcus pneumoniae genome assembly 7054_4#6, scaffold ERS022540SCcontig000050, whole genome shotgun sequence	6358	HSATII	nr	bacteria	|-__root|-__cellular_organisms|k__Bacteria|-__Terrabacteria_group|p__Firmicutes|c__Bacilli|o__Lactobacillales|f__Streptococcaceae|g__Streptococcus|s__Streptococcus_pneumoniae
NZ_QLYV01000095.1:127-299	gi|884051352|embl|CKC05796.1|	100	42	0	0	46	171	1	42	5e-17	94.7	CKC05796.1	Uncharacterised protein [Streptococcus pneumoniae]	92	live	1313	2015-03-23	2015-06-13		Streptococcus pneumoniae	Bacteria	1	CMKS01000050.1:5239-5517	CMKS01000050.1	Streptococcus pneumoniae genome assembly 7054_4#6, scaffold ERS022540SCcontig000050, whole genome shotgun sequence	6358	HSATII	nr	bacteria	|-__root|-__cellular_organisms|k__Bacteria|-__Terrabacteria_group|p__Firmicutes|c__Bacilli|o__Lactobacillales|f__Streptococcaceae|g__Streptococcus|s__Streptococcus_pneumoniae
NZ_PVDJ01000058.1:275-429	gi|884051353|embl|CKC05819.1|	100	32	0	0	97	2	1	32	2e-09	69.3	CKC05819.1	Uncharacterised protein [Streptococcus pneumoniae]	34	live	1313	2015-03-23	2015-06-13		Streptococcus pneumoniae	Bacteria	5	CMKS01000050.1:5524-5628,CQSC01000305.1:228-332,CQTE01000215.1:2160-2264,FSLH01000033.1:224-328,FTZV01000200.1:584-688	CMKS01000050.1	Streptococcus pneumoniae genome assembly 7054_4#6, scaffold ERS022540SCcontig000050, whole genome shotgun sequence	6358	HSATII	nr	bacteria	|-__root|-__cellular_organisms|k__Bacteria|-__Terrabacteria_group|p__Firmicutes|c__Bacilli|o__Lactobacillales|f__Streptococcaceae|g__Streptococcus|s__Streptococcus_pneumoniae
NZ_JPWZ01000242.1:124-287	gi|884051354|embl|CKC05844.1|	100	54	0	0	2	163	7	60	6e-25	120.9	CKC05844.1	Uncharacterised protein [Streptococcus pneumoniae]	105	live	1313	2015-03-23	2015-06-13		Streptococcus pneumoniae	Bacteria	1	CMKS01000050.1:5619-5936	CMKS01000050.1	Streptococcus pneumoniae genome assembly 7054_4#6, scaffold ERS022540SCcontig000050, whole genome shotgun sequence	6358	HSATII	nr	bacteria	|-__root|-__cellular_organisms|k__Bacteria|-__Terrabacteria_group|p__Firmicutes|c__Bacilli|o__Lactobacillales|f__Streptococcaceae|g__Streptococcus|s__Streptococcus_pneumoniae
NZ_CMHF01000056.1:3458-3625	gi|884051355|embl|CKC05865.1|	100	44	0	0	35	166	1	44	1e-17	97.1	CKC05865.1	Uncharacterised protein [Streptococcus pneumoniae]	44	live	1313	2015-03-23	2015-06-13		Streptococcus pneumoniae	Bacteria	1	CMKS01000050.1:5900-6034	CMKS01000050.1	Streptococcus pneumoniae genome assembly 7054_4#6, scaffold ERS022540SCcontig000050, whole genome shotgun sequence	6358	HSATII	nr	bacteria	|-__root|-__cellular_organisms|k__Bacteria|-__Terrabacteria_group|p__Firmicutes|c__Bacilli|o__Lactobacillales|f__Streptococcaceae|g__Streptococcus|s__Streptococcus_pneumoniae
NZ_CMKS01000050.1:6021-6196	gi|884051356|embl|CKC05888.1|	100	35	0	0	175	71	6	40	5e-13	81.3	CKC05888.1	Uncharacterised protein [Streptococcus pneumoniae]	40	live	1313	2015-03-23	2015-06-13		Streptococcus pneumoniae	Bacteria	1	CMKS01000050.1:6088-6210	CMKS01000050.1	Streptococcus pneumoniae genome assembly 7054_4#6, scaffold ERS022540SCcontig000050, whole genome shotgun sequence	6358	HSATII	nr	bacteria	|-__root|-__cellular_organisms|k__Bacteria|-__Terrabacteria_group|p__Firmicutes|c__Bacilli|o__Lactobacillales|f__Streptococcaceae|g__Streptococcus|s__Streptococcus_pneumoniae
NZ_CMKS01000050.1:6197-6358	gi|884051357|embl|CKC05914.1|	100	50	0	0	150	1	1	50	1e-21	110.2	CKC05914.1	Uncharacterised protein [Streptococcus pneumoniae]	53	live	1313	2015-03-23	2015-06-13		Streptococcus pneumoniae	Bacteria	1	CMKS01000050.1:6185-6346	CMKS01000050.1	Streptococcus pneumoniae genome assembly 7054_4#6, scaffold ERS022540SCcontig000050, whole genome shotgun sequence	6358	HSATII	nr	bacteria	|-__root|-__cellular_organisms|k__Bacteria|-__Terrabacteria_group|p__Firmicutes|c__Bacilli|o__Lactobacillales|f__Streptococcaceae|g__Streptococcus|s__Streptococcus_pneumoniae
NZ_JPWZ01000242.1:124-287	gi|913376255|ref|WP_050389104.1|	100	54	0	0	2	163	19	72	6e-25	120.9	WP_050389104.1	hypothetical protein [Streptococcus pneumoniae]	117	live	1313	2015-08-06	2015-08-06		Streptococcus pneumoniae	Bacteria	2	NZ_CMKS01000050.1:5619-5972,QFQJ01000216.1:116-469	NZ_CMKS01000050.1	Streptococcus pneumoniae strain SMRU3030, whole genome shotgun sequence	6358	HSATII	nr	bacteria	|-__root|-__cellular_organisms|k__Bacteria|-__Terrabacteria_group|p__Firmicutes|c__Bacilli|o__Lactobacillales|f__Streptococcaceae|g__Streptococcus|s__Streptococcus_pneumoniae
NZ_MPOR01000079.1:757-4050	gi|1120935894|ref|WP_073454701.1|	100	1098	0	0	3294	1	1	1098	0	2214.5	WP_073454701.1	DUF1725 domain-containing protein [Pseudomonas sp. FSL W5-0203]	1275	live	1920491	2016-12-19	2017-12-13		Pseudomonas sp. FSL W5-0203	Bacteria	2	NZ_MPOR01000079.1:223-4050,MPOR01000079.1:223-4050	NZ_MPOR01000079.1	Pseudomonas sp. FSL W5-0203 NODE_79_length_6219_cov_0.253553_ID_14916, whole genome shotgun sequence	6219	L1P1_orf2	nr	bacteria	|-__root|-__cellular_organisms|k__Bacteria|p__Proteobacteria|c__Gammaproteobacteria|o__Pseudomonadales|f__Pseudomonadaceae|g__Pseudomonas|s__Pseudomonas_sp._FSL_W5-0203
NZ_FTZV01000294.1:1314-3058	gi|1382142216|ref|WP_108011493.1|	97.04	338	10	0	1230	217	1	338	2e-174	621.3	WP_108011493.1	hypothetical protein [Mycobacterium tuberculosis]	338	live	1773	2018-04-25	2018-04-25		Mycobacterium tuberculosis	Bacteria	1	NZ_PYPZ01000098.1:1261-2277	NZ_PYPZ01000098.1	Mycobacterium tuberculosis strain AUH13 NODE_99_length_6206_cov_17.2158, whole genome shotgun sequence	6206	L1HS_5end	nr	bacteria	|-__root|-__cellular_organisms|k__Bacteria|-__Terrabacteria_group|p__Actinobacteria|c__Actinobacteria|o__Corynebacteriales|f__Mycobacteriaceae|g__Mycobacterium|-__Mycobacterium_tuberculosis_complex|s__Mycobacterium_tuberculosis
NZ_PYPZ01000098.1:2341-5634	gi|1382142219|ref|WP_108011496.1|	100	1098	0	0	1	3294	1	1098	0	2216.4	WP_108011496.1	DUF1725 domain-containing protein [Mycobacterium tuberculosis]	1275	live	1773	2018-04-25	2018-04-29		Mycobacterium tuberculosis	Bacteria	1	NZ_PYPZ01000098.1:2341-6168	NZ_PYPZ01000098.1	Mycobacterium tuberculosis strain AUH13 NODE_99_length_6206_cov_17.2158, whole genome shotgun sequence	6206	L1P1_orf2	nr	bacteria	|-__root|-__cellular_organisms|k__Bacteria|-__Terrabacteria_group|p__Actinobacteria|c__Actinobacteria|o__Corynebacteriales|f__Mycobacteriaceae|g__Mycobacterium|-__Mycobacterium_tuberculosis_complex|s__Mycobacterium_tuberculosis
NZ_FPIJ01000009.1:7540-7919	gi|1190713213|embl|SFW05809.1|	100	96	0	0	1	288	8	103	7e-50	204.1	SFW05809.1	exodeoxyribonuclease III (xth) [Chlamydia abortus]	112	live	83555	2017-05-10	2017-05-10		Chlamydia abortus	Bacteria	1	FPIJ01000010.1:3243-3581	FPIJ01000010.1	Chlamydophila abortus strain T20 genome assembly, contig: ERS003308SCcontig000010, whole genome shotgun sequence	6116	L1P1_orf2	nr	bacteria	|-__root|-__cellular_organisms|k__Bacteria|-__PVC_group|p__Chlamydiae|c__Chlamydiia|o__Chlamydiales|f__Chlamydiaceae|-__Chlamydia/Chlamydophila_group|g__Chlamydia|s__Chlamydia_abortus
NZ_FPIK01000009.1:2551-3360	gi|1190713214|embl|SFW05812.1|	97.87	141	3	0	637	215	1	141	9e-73	282	SFW05812.1	L1 transposable element [Chlamydia abortus]	141	live	83555	2017-05-10	2017-05-10		Chlamydia abortus	Bacteria	1	FPIJ01000010.1:3622-4047	FPIJ01000010.1	Chlamydophila abortus strain T20 genome assembly, contig: ERS003308SCcontig000010, whole genome shotgun sequence	6116	L1HS_5end	nr	bacteria	|-__root|-__cellular_organisms|k__Bacteria|-__PVC_group|p__Chlamydiae|c__Chlamydiia|o__Chlamydiales|f__Chlamydiaceae|-__Chlamydia/Chlamydophila_group|g__Chlamydia|s__Chlamydia_abortus
NZ_FPIK01000009.1:2551-3360	gi|1196979755|ref|WP_086400413.1|	98.08	156	3	0	682	215	2	157	4e-82	313.2	WP_086400413.1	hypothetical protein [Chlamydia abortus]	157	live	83555	2017-05-24	2017-05-24		Chlamydia abortus	Bacteria	1	NZ_FPIJ01000010.1:3622-4095	NZ_FPIJ01000010.1	Chlamydia abortus strain T20, whole genome shotgun sequence	6116	L1HS_5end	nr	bacteria	|-__root|-__cellular_organisms|k__Bacteria|-__PVC_group|p__Chlamydiae|c__Chlamydiia|o__Chlamydiales|f__Chlamydiaceae|-__Chlamydia/Chlamydophila_group|g__Chlamydia|s__Chlamydia_abortus
NZ_FQLL01000005.1:2080-3150	gi|1196979756|ref|WP_086400414.1|	99.17	121	1	0	2	364	10	130	2e-62	248.1	WP_086400414.1	hypothetical protein [Chlamydia abortus]	140	live	83555	2017-05-24	2017-05-24		Chlamydia abortus	Bacteria	2	NZ_FPIJ01000010.1:4062-4484,FPIJ01000010.1:4062-4484	NZ_FPIJ01000010.1	Chlamydia abortus strain T20, whole genome shotgun sequence	6116	L1P1_orf2	nr	bacteria	|-__root|-__cellular_organisms|k__Bacteria|-__PVC_group|p__Chlamydiae|c__Chlamydiia|o__Chlamydiales|f__Chlamydiaceae|-__Chlamydia/Chlamydophila_group|g__Chlamydia|s__Chlamydia_abortus
NZ_PYPV01000099.1:595-3888	gi|1382147775|ref|WP_108016252.1|	100	1098	0	0	3294	1	1	1098	0	2216	WP_108016252.1	DUF1725 domain-containing protein [Mycobacterium tuberculosis]	1275	live	1773	2018-04-25	2018-04-29		Mycobacterium tuberculosis	Bacteria	1	NZ_PYPV01000099.1:61-3888	NZ_PYPV01000099.1	Mycobacterium tuberculosis strain AUH8 NODE_100_length_6064_cov_12.0701, whole genome shotgun sequence	6064	L1P1_orf2	nr	bacteria	|-__root|-__cellular_organisms|k__Bacteria|-__Terrabacteria_group|p__Actinobacteria|c__Actinobacteria|o__Corynebacteriales|f__Mycobacteriaceae|g__Mycobacterium|-__Mycobacterium_tuberculosis_complex|s__Mycobacterium_tuberculosis
NZ_FTZV01000294.1:1314-3058	gi|1382147776|ref|WP_108016253.1|	97.04	338	10	0	1230	217	1	338	1e-173	619	WP_108016253.1	hypothetical protein [Mycobacterium tuberculosis]	338	live	1773	2018-04-25	2018-04-25		Mycobacterium tuberculosis	Bacteria	1	NZ_PYPV01000099.1:3952-4968	NZ_PYPV01000099.1	Mycobacterium tuberculosis strain AUH8 NODE_100_length_6064_cov_12.0701, whole genome shotgun sequence	6064	L1HS_5end	nr	bacteria	|-__root|-__cellular_organisms|k__Bacteria|-__Terrabacteria_group|p__Actinobacteria|c__Actinobacteria|o__Corynebacteriales|f__Mycobacteriaceae|g__Mycobacterium|-__Mycobacterium_tuberculosis_complex|s__Mycobacterium_tuberculosis
NZ_FPLY01000003.1:723-4016	gi|1197015644|ref|WP_086427321.1|	100	1098	0	0	3294	1	1	1098	0	2182.5	WP_086427321.1	DUF1725 domain-containing protein [Chlamydia abortus]	1275	live	83555	2017-05-24	2017-12-12		Chlamydia abortus	Bacteria	2	NZ_FPLY01000003.1:189-4016,FPLY01000003.1:189-4016	NZ_FPLY01000003.1	Chlamydia abortus strain 10DC85, whole genome shotgun sequence	6049	L1P1_orf2	nr	bacteria	|-__root|-__cellular_organisms|k__Bacteria|-__PVC_group|p__Chlamydiae|c__Chlamydiia|o__Chlamydiales|f__Chlamydiaceae|-__Chlamydia/Chlamydophila_group|g__Chlamydia|s__Chlamydia_abortus
NZ_CIEA01000101.1:1-1286	gi|1003911085|gb|KXZ01564.1|	98.39	186	3	0	513	1070	1	186	1e-97	365.9	KXZ01564.1	hypothetical protein AT276_04355 [Bacillus cereus]	186	live	1396	2016-03-09	2016-03-09		Bacillus cereus	Bacteria	1	LONH01000058.1:1477-2037	LONH01000058.1	Bacillus cereus strain FSL W8-0520 contig_150, whole genome shotgun sequence	6031	L1HS_5end	nr	bacteria	|-__root|-__cellular_organisms|k__Bacteria|-__Terrabacteria_group|p__Firmicutes|c__Bacilli|o__Bacillales|f__Bacillaceae|g__Bacillus|-__Bacillus_cereus_group|s__Bacillus_cereus
NZ_LONH01000058.1:2101-5394	gi|1003911086|gb|KXZ01565.1|	99.89	931	1	0	502	3294	1	931	0	1877.8	KXZ01565.1	endonuclease [Bacillus cereus]	1108	live	1396	2016-03-09	2016-03-09		Bacillus cereus	Bacteria	1	LONH01000058.1:2602-5928	LONH01000058.1	Bacillus cereus strain FSL W8-0520 contig_150, whole genome shotgun sequence	6031	L1P1_orf2	nr	bacteria	|-__root|-__cellular_organisms|k__Bacteria|-__Terrabacteria_group|p__Firmicutes|c__Bacilli|o__Bacillales|f__Bacillaceae|g__Bacillus|-__Bacillus_cereus_group|s__Bacillus_cereus
NZ_FTZV01000294.1:1314-3058	gi|1169095619|ref|WP_080450771.1|	100	48	0	0	1230	1087	1	48	4e-18	102.4	WP_080450771.1	hypothetical protein [Bacillus cereus]	48	live	1396	2017-03-27	2017-03-27		Bacillus cereus	Bacteria	1	NZ_LONH01000058.1:1021-1167	NZ_LONH01000058.1	Bacillus cereus strain FSL W8-0520 contig_150, whole genome shotgun sequence	6031	L1HS_5end	nr	bacteria	|-__root|-__cellular_organisms|k__Bacteria|-__Terrabacteria_group|p__Firmicutes|c__Bacilli|o__Bacillales|f__Bacillaceae|g__Bacillus|-__Bacillus_cereus_group|s__Bacillus_cereus
NZ_UGRJ01000003.1:1130579-1131300	gi|1169095620|ref|WP_080450772.1|	95.77	71	3	0	381	593	1	71	9e-30	138.7	WP_080450772.1	hypothetical protein [Bacillus cereus]	71	live	1396	2017-03-27	2017-03-27		Bacillus cereus	Bacteria	1	NZ_LONH01000058.1:1195-1410	NZ_LONH01000058.1	Bacillus cereus strain FSL W8-0520 contig_150, whole genome shotgun sequence	6031	L1HS_5end	nr	bacteria	|-__root|-__cellular_organisms|k__Bacteria|-__Terrabacteria_group|p__Firmicutes|c__Bacilli|o__Bacillales|f__Bacillaceae|g__Bacillus|-__Bacillus_cereus_group|s__Bacillus_cereus
NZ_CIEA01000101.1:1-1286	gi|1169095622|ref|WP_080450774.1|	98.5	200	3	0	471	1070	1	200	2e-106	395.2	WP_080450774.1	hypothetical protein [Bacillus cereus]	200	live	1396	2017-03-27	2017-03-27		Bacillus cereus	Bacteria	1	NZ_LONH01000058.1:1435-2037	NZ_LONH01000058.1	Bacillus cereus strain FSL W8-0520 contig_150, whole genome shotgun sequence	6031	L1HS_5end	nr	bacteria	|-__root|-__cellular_organisms|k__Bacteria|-__Terrabacteria_group|p__Firmicutes|c__Bacilli|o__Bacillales|f__Bacillaceae|g__Bacillus|-__Bacillus_cereus_group|s__Bacillus_cereus
NZ_LONH01000058.1:2101-5394	gi|1169095624|ref|WP_080450776.1|	100	1098	0	0	1	3294	1	1098	0	2215.3	WP_080450776.1	DUF1725 domain-containing protein [Bacillus cereus]	1275	live	1396	2017-03-27	2017-12-13		Bacillus cereus	Bacteria	1	NZ_LONH01000058.1:2101-5928	NZ_LONH01000058.1	Bacillus cereus strain FSL W8-0520 contig_150, whole genome shotgun sequence	6031	L1P1_orf2	nr	bacteria	|-__root|-__cellular_organisms|k__Bacteria|-__Terrabacteria_group|p__Firmicutes|c__Bacilli|o__Bacillales|f__Bacillaceae|g__Bacillus|-__Bacillus_cereus_group|s__Bacillus_cereus
NZ_FPLU01000003.1:89-926	gi|1190735849|embl|SGA33569.1|	99.56	227	1	0	838	158	60	286	1e-134	487.3	SGA33569.1	Retron-type reverse transcriptase [Chlamydia abortus]	286	live	83555	2017-05-10	2017-05-10		Chlamydia abortus	Bacteria	1	FPMJ01000013.1:237-1097	FPMJ01000013.1	Chlamydia abortus strain 99DC4 genome assembly, contig: ERS067050SCcontig000013, whole genome shotgun sequence	5988	L1HS_3end	nr	bacteria	|-__root|-__cellular_organisms|k__Bacteria|-__PVC_group|p__Chlamydiae|c__Chlamydiia|o__Chlamydiales|f__Chlamydiaceae|-__Chlamydia/Chlamydophila_group|g__Chlamydia|s__Chlamydia_abortus
NZ_FPLY01000003.1:723-4016	gi|1190735850|embl|SGA33570.1|	99.75	395	1	0	1185	1	1	395	8e-223	783.5	SGA33570.1	Retron-type reverse transcriptase [Chlamydia abortus]	424	live	83555	2017-05-10	2017-05-10		Chlamydia abortus	Bacteria	1	FPMJ01000013.1:1231-2505	FPMJ01000013.1	Chlamydia abortus strain 99DC4 genome assembly, contig: ERS067050SCcontig000013, whole genome shotgun sequence	5988	L1P1_orf2	nr	bacteria	|-__root|-__cellular_organisms|k__Bacteria|-__PVC_group|p__Chlamydiae|c__Chlamydiia|o__Chlamydiales|f__Chlamydiaceae|-__Chlamydia/Chlamydophila_group|g__Chlamydia|s__Chlamydia_abortus
NZ_FPMI01000004.1:66-3359	gi|1190735851|embl|SGA33572.1|	99.34	756	5	0	3294	1027	1	756	0	1489.2	SGA33572.1	exonuclease III [Chlamydia abortus]	792	live	83555	2017-05-10	2017-05-10		Chlamydia abortus	Bacteria	1	FPMJ01000013.1:2585-4963	FPMJ01000013.1	Chlamydia abortus strain 99DC4 genome assembly, contig: ERS067050SCcontig000013, whole genome shotgun sequence	5988	L1P1_orf2	nr	bacteria	|-__root|-__cellular_organisms|k__Bacteria|-__PVC_group|p__Chlamydiae|c__Chlamydiia|o__Chlamydiales|f__Chlamydiaceae|-__Chlamydia/Chlamydophila_group|g__Chlamydia|s__Chlamydia_abortus
NZ_FPMB01000003.1:1-2735	gi|1261477432|gb|PFH30931.1|	99.35	153	1	0	688	1146	1	153	1e-79	307.4	PFH30931.1	hypothetical protein BESB_058130 [Besnoitia besnoiti]	165	live	94643	2017-10-17	2017-10-17		Besnoitia besnoiti	Eukaryota	1	NWUJ01000037.1:3217-3775	NWUJ01000037.1	Besnoitia besnoiti strain Bb-Ger1 contig00044, whole genome shotgun sequence	5919	L1P1_orf2	nr	bacteria	|-__root|-__cellular_organisms|k__Eukaryota|-__Alveolata|p__Apicomplexa|c__Conoidasida|-__Coccidia|o__Eucoccidiorida|-__Eimeriorina|f__Sarcocystidae|g__Besnoitia|s__Besnoitia_besnoiti
NZ_MTHY01000206.1:1-2272	gi|1261477433|gb|PFH30932.1|	95.58	113	5	0	1238	1576	1	113	7e-54	221.5	PFH30932.1	hypothetical protein BESB_058140 [Besnoitia besnoiti]	129	live	94643	2017-10-17	2017-10-17		Besnoitia besnoiti	Eukaryota	1	NWUJ01000037.1:4191-4580	NWUJ01000037.1	Besnoitia besnoiti strain Bb-Ger1 contig00044, whole genome shotgun sequence	5919	L1P1_orf2	nr	bacteria	|-__root|-__cellular_organisms|k__Eukaryota|-__Alveolata|p__Apicomplexa|c__Conoidasida|-__Coccidia|o__Eucoccidiorida|-__Eimeriorina|f__Sarcocystidae|g__Besnoitia|s__Besnoitia_besnoiti
NZ_FPIJ01000009.1:9249-10593	gi|1190721111|embl|SFW04818.1|	98.68	380	5	0	2	1141	9	388	9e-209	734.9	SFW04818.1	exonuclease III [Chlamydia abortus]	414	live	83555	2017-05-10	2017-05-10		Chlamydia abortus	Bacteria	1	FPIK01000013.1:2656-3900	FPIK01000013.1	Chlamydophila abortus strain 83/12 genome assembly, contig: ERS003312SCcontig000013, whole genome shotgun sequence	5850	L1P1_orf2	nr	bacteria	|-__root|-__cellular_organisms|k__Bacteria|-__PVC_group|p__Chlamydiae|c__Chlamydiia|o__Chlamydiales|f__Chlamydiaceae|-__Chlamydia/Chlamydophila_group|g__Chlamydia|s__Chlamydia_abortus
NZ_FQLM01000003.1:4122-5041	gi|1190721112|embl|SFW04820.1|	95.76	236	10	0	918	211	33	268	8e-124	451.8	SFW04820.1	L1 transposable element [Chlamydia abortus]	268	live	83555	2017-05-10	2017-05-10		Chlamydia abortus	Bacteria	1	FPIK01000013.1:3948-4754	FPIK01000013.1	Chlamydophila abortus strain 83/12 genome assembly, contig: ERS003312SCcontig000013, whole genome shotgun sequence	5850	L1PBa_5end	nr	bacteria	|-__root|-__cellular_organisms|k__Bacteria|-__PVC_group|p__Chlamydiae|c__Chlamydiia|o__Chlamydiales|f__Chlamydiaceae|-__Chlamydia/Chlamydophila_group|g__Chlamydia|s__Chlamydia_abortus
NZ_FPIJ01000009.1:9249-10593	gi|1203192426|ref|WP_087672100.1|	100	244	0	0	2	733	9	252	4e-139	503.4	WP_087672100.1	hypothetical protein [Chlamydia abortus]	273	live	83555	2017-06-09	2017-06-09		Chlamydia abortus	Bacteria	2	NZ_FPIK01000013.1:385-1206,FPIK01000013.1:385-1206	NZ_FPIK01000013.1	Chlamydia abortus strain 83/12, whole genome shotgun sequence	5850	L1P1_orf2	nr	bacteria	|-__root|-__cellular_organisms|k__Bacteria|-__PVC_group|p__Chlamydiae|c__Chlamydiia|o__Chlamydiales|f__Chlamydiaceae|-__Chlamydia/Chlamydophila_group|g__Chlamydia|s__Chlamydia_abortus
NZ_FQLM01000003.1:4122-5041	gi|1203192427|ref|WP_087672101.1|	95.76	236	10	0	918	211	226	461	8e-124	451.8	WP_087672101.1	hypothetical protein [Chlamydia abortus]	461	live	83555	2017-06-09	2017-06-09		Chlamydia abortus	Bacteria	2	NZ_FPIK01000013.1:1230-2615,FPIK01000013.1:1230-2615	NZ_FPIK01000013.1	Chlamydia abortus strain 83/12, whole genome shotgun sequence	5850	L1PBa_5end	nr	bacteria	|-__root|-__cellular_organisms|k__Bacteria|-__PVC_group|p__Chlamydiae|c__Chlamydiia|o__Chlamydiales|f__Chlamydiaceae|-__Chlamydia/Chlamydophila_group|g__Chlamydia|s__Chlamydia_abortus
NZ_FQLM01000003.1:4122-5041	gi|1203192428|ref|WP_087672102.1|	95.76	236	10	0	918	211	36	271	8e-124	451.8	WP_087672102.1	hypothetical protein [Chlamydia abortus]	271	live	83555	2017-06-09	2017-06-09		Chlamydia abortus	Bacteria	1	NZ_FPIK01000013.1:3939-4754	NZ_FPIK01000013.1	Chlamydia abortus strain 83/12, whole genome shotgun sequence	5850	L1PBa_5end	nr	bacteria	|-__root|-__cellular_organisms|k__Bacteria|-__PVC_group|p__Chlamydiae|c__Chlamydiia|o__Chlamydiales|f__Chlamydiaceae|-__Chlamydia/Chlamydophila_group|g__Chlamydia|s__Chlamydia_abortus
NZ_FPIK01000013.1:4819-5850	gi|1203192429|ref|WP_087672103.1|	100	241	0	0	1	723	9	249	3e-137	496.9	WP_087672103.1	hypothetical protein [Chlamydia abortus]	249	live	83555	2017-06-09	2017-06-09		Chlamydia abortus	Bacteria	2	NZ_FPIK01000013.1:4795-5544,FPIK01000013.1:4795-5544	NZ_FPIK01000013.1	Chlamydia abortus strain 83/12, whole genome shotgun sequence	5850	L1P1_orf2	nr	bacteria	|-__root|-__cellular_organisms|k__Bacteria|-__PVC_group|p__Chlamydiae|c__Chlamydiia|o__Chlamydiales|f__Chlamydiaceae|-__Chlamydia/Chlamydophila_group|g__Chlamydia|s__Chlamydia_abortus
NZ_LZSH01000356.1:854-4147	gi|1037499123|gb|OBA94704.1|	99.89	931	1	0	2793	1	1	931	0	1876.3	OBA94704.1	endonuclease [Mycobacterium sp. 1482268.1]	1108	live	1834080	2016-06-17	2016-06-17		Mycobacteriaceae bacterium 1482268.1	Bacteria	1	LZSH01000356.1:320-3646	LZSH01000356.1	Mycobacteriaceae bacterium 1482268.1 contig_42, whole genome shotgun sequence	5718	L1P1_orf2	nr	bacteria	|-__root|-__cellular_organisms|k__Bacteria|-__Terrabacteria_group|p__Actinobacteria|c__Actinobacteria|o__Corynebacteriales|f__Mycobacteriaceae|-__unclassified_Mycobacteriaceae|s__Mycobacteriaceae_bacterium_1482268.1
NZ_CIEA01000101.1:1-1286	gi|1178176796|ref|WP_082932518.1|	98.22	338	6	0	57	1070	1	338	1e-177	631.7	WP_082932518.1	hypothetical protein [Mycobacterium sp. 1482268.1]	338	live	1834080	2017-04-12	2017-04-12		Mycobacteriaceae bacterium 1482268.1	Bacteria	1	NZ_LZSH01000356.1:4211-5227	NZ_LZSH01000356.1	Mycobacteriaceae bacterium 1482268.1 contig_42, whole genome shotgun sequence	5718	L1HS_5end	nr	bacteria	|-__root|-__cellular_organisms|k__Bacteria|-__Terrabacteria_group|p__Actinobacteria|c__Actinobacteria|o__Corynebacteriales|f__Mycobacteriaceae|-__unclassified_Mycobacteriaceae|s__Mycobacteriaceae_bacterium_1482268.1
NZ_LZSH01000356.1:854-4147	gi|1178176797|ref|WP_082932519.1|	100	1098	0	0	3294	1	1	1098	0	2213.7	WP_082932519.1	DUF1725 domain-containing protein [Mycobacterium sp. 1482268.1]	1275	live	1834080	2017-04-12	2017-12-12		Mycobacteriaceae bacterium 1482268.1	Bacteria	1	NZ_LZSH01000356.1:320-4147	NZ_LZSH01000356.1	Mycobacteriaceae bacterium 1482268.1 contig_42, whole genome shotgun sequence	5718	L1P1_orf2	nr	bacteria	|-__root|-__cellular_organisms|k__Bacteria|-__Terrabacteria_group|p__Actinobacteria|c__Actinobacteria|o__Corynebacteriales|f__Mycobacteriaceae|-__unclassified_Mycobacteriaceae|s__Mycobacteriaceae_bacterium_1482268.1
NZ_CIEA01000101.1:1-1286	gi|1327608495|ref|WP_102022343.1|	97.5	200	5	0	471	1070	1	200	1e-104	389	WP_102022343.1	hypothetical protein [Klebsiella pneumoniae]	200	live	573	2018-01-11	2018-01-11		Klebsiella pneumoniae	Bacteria	1	NZ_NWDR01000066.1:1083-1685	NZ_NWDR01000066.1	Klebsiella pneumoniae subsp. pneumoniae strain WCHKP020127 NODE_67_length_5690_cov_31.7765, whole genome shotgun sequence	5690	L1HS_5end	nr	bacteria	|-__root|-__cellular_organisms|k__Bacteria|p__Proteobacteria|c__Gammaproteobacteria|o__Enterobacterales|f__Enterobacteriaceae|g__Klebsiella|s__Klebsiella_pneumoniae
NZ_NWDR01000066.1:1749-5042	gi|1327608496|ref|WP_102022344.1|	100	1098	0	0	1	3294	1	1098	0	2214.9	WP_102022344.1	DUF1725 domain-containing protein [Klebsiella pneumoniae]	1275	live	573	2018-01-11	2018-02-02		Klebsiella pneumoniae	Bacteria	1	NZ_NWDR01000066.1:1749-5576	NZ_NWDR01000066.1	Klebsiella pneumoniae subsp. pneumoniae strain WCHKP020127 NODE_67_length_5690_cov_31.7765, whole genome shotgun sequence	5690	L1P1_orf2	nr	bacteria	|-__root|-__cellular_organisms|k__Bacteria|p__Proteobacteria|c__Gammaproteobacteria|o__Enterobacterales|f__Enterobacteriaceae|g__Klebsiella|s__Klebsiella_pneumoniae
NZ_LZSE01000010.1:1742-5035	gi|1037479610|gb|OBA76484.1|	99.89	931	1	0	502	3294	1	931	0	1877.4	OBA76484.1	endonuclease [Mycobacterium sp. 1554424.7]	1108	live	1834082	2016-06-17	2016-06-17		Mycobacterium sp. 1554424.7	Bacteria	1	LZSE01000010.1:2243-5569	LZSE01000010.1	Mycobacterium sp. 1554424.7 contig_107, whole genome shotgun sequence	5635	L1P1_orf2	nr	bacteria	|-__root|-__cellular_organisms|k__Bacteria|-__Terrabacteria_group|p__Actinobacteria|c__Actinobacteria|o__Corynebacteriales|f__Mycobacteriaceae|g__Mycobacterium|s__Mycobacterium_sp._1554424.7
NZ_FTZV01000294.1:1314-3058	gi|1178414452|ref|WP_082937036.1|	99.41	338	2	0	1230	217	1	338	2e-179	638.3	WP_082937036.1	hypothetical protein [Mycobacterium sp. 1554424.7]	338	live	1834082	2017-04-12	2017-04-12		Mycobacterium sp. 1554424.7	Bacteria	1	NZ_LZSE01000010.1:662-1678	NZ_LZSE01000010.1	Mycobacterium sp. 1554424.7 contig_107, whole genome shotgun sequence	5635	L1HS_5end	nr	bacteria	|-__root|-__cellular_organisms|k__Bacteria|-__Terrabacteria_group|p__Actinobacteria|c__Actinobacteria|o__Corynebacteriales|f__Mycobacteriaceae|g__Mycobacterium|s__Mycobacterium_sp._1554424.7
NZ_LZSE01000010.1:1742-5035	gi|1178414453|ref|WP_082937037.1|	100	1098	0	0	1	3294	1	1098	0	2214.9	WP_082937037.1	DUF1725 domain-containing protein [Mycobacterium sp. 1554424.7]	1275	live	1834082	2017-04-12	2017-12-12		Mycobacterium sp. 1554424.7	Bacteria	1	NZ_LZSE01000010.1:1742-5569	NZ_LZSE01000010.1	Mycobacterium sp. 1554424.7 contig_107, whole genome shotgun sequence	5635	L1P1_orf2	nr	bacteria	|-__root|-__cellular_organisms|k__Bacteria|-__Terrabacteria_group|p__Actinobacteria|c__Actinobacteria|o__Corynebacteriales|f__Mycobacteriaceae|g__Mycobacterium|s__Mycobacterium_sp._1554424.7
NZ_FQLK01000003.1:1935-2535	gi|343472028|embl|CCD15697.1|	99.24	131	1	0	599	207	136	266	5e-66	258.5	CCD15697.1	unnamed protein product [Trypanosoma congolense IL3000]	266	live	1068625	2011-08-04	2012-05-11		Trypanosoma congolense IL3000	Eukaryota	1	CAEQ01002017.1:4655-5455	CAEQ01002017.1	Trypanosoma congolense IL3000 WGS project CAEQ00000000 data, annotated contig 27, whole genome shotgun sequence	5536	L1PBa_5end	nr	bacteria	|-__root|-__cellular_organisms|k__Eukaryota|-__Euglenozoa|o__Kinetoplastida|f__Trypanosomatidae|g__Trypanosoma|-__Nannomonas|s__Trypanosoma_congolense|-__Trypanosoma_congolense_IL3000
NZ_JHDV01000044.1:1-1175	gi|1301623336|gb|PKB97479.1|	100	70	0	0	813	1022	1	70	2e-30	142.5	PKB97479.1	hypothetical protein RhiirA5_247088, partial [Rhizophagus irregularis]	70	live	588596	2017-12-08	2017-12-08		Rhizophagus irregularis	Eukaryota	1	LLXJ01003185.1:2651-2860	LLXJ01003185.1	Rhizophagus irregularis strain A5 scaffold3187_size5419, whole genome shotgun sequence	5419	L1P1_orf2	nr	bacteria	|-__root|-__cellular_organisms|k__Eukaryota|-__Opisthokonta|-__Fungi|-__Fungi_incertae_sedis|p__Mucoromycota|-__Glomeromycotina|c__Glomeromycetes|o__Glomerales|f__Glomeraceae|g__Rhizophagus|s__Rhizophagus_irregularis
NZ_CIEA01000101.1:1-1286	gi|1382070732|ref|WP_107944973.1|	95.83	48	2	0	57	200	1	48	2e-16	96.3	WP_107944973.1	hypothetical protein [Mycobacterium tuberculosis]	48	live	1773	2018-04-25	2018-04-25		Mycobacterium tuberculosis	Bacteria	1	NZ_PYQC01000120.1:141-287	NZ_PYQC01000120.1	Mycobacterium tuberculosis strain AUH16 NODE_120_length_5375_cov_1.34203, whole genome shotgun sequence	5375	L1HS_5end	nr	bacteria	|-__root|-__cellular_organisms|k__Bacteria|-__Terrabacteria_group|p__Actinobacteria|c__Actinobacteria|o__Corynebacteriales|f__Mycobacteriaceae|g__Mycobacterium|-__Mycobacterium_tuberculosis_complex|s__Mycobacterium_tuberculosis
NZ_JPWZ01000251.1:1-551	gi|1382070734|ref|WP_107944975.1|	98.81	84	1	0	187	438	2	85	2e-39	169.9	WP_107944975.1	hypothetical protein [Mycobacterium tuberculosis]	85	live	1773	2018-04-25	2018-04-25		Mycobacterium tuberculosis	Bacteria	1	NZ_PYQC01000120.1:899-1156	NZ_PYQC01000120.1	Mycobacterium tuberculosis strain AUH16 NODE_120_length_5375_cov_1.34203, whole genome shotgun sequence	5375	L1HS_5end	nr	bacteria	|-__root|-__cellular_organisms|k__Bacteria|-__Terrabacteria_group|p__Actinobacteria|c__Actinobacteria|o__Corynebacteriales|f__Mycobacteriaceae|g__Mycobacterium|-__Mycobacterium_tuberculosis_complex|s__Mycobacterium_tuberculosis
NZ_FPLY01000003.1:723-4016	gi|1190670273|embl|SGA28217.1|	100	1098	0	0	3294	1	1	1098	0	2182.5	SGA28217.1	exonuclease III [Chlamydia abortus]	1275	live	83555	2017-05-10	2017-05-10		Chlamydia abortus	Bacteria	1	FPMH01000011.1:1296-5123	FPMH01000011.1	Chlamydia abortus strain C10_98 genome assembly, contig: ERS067037SCcontig000011, whole genome shotgun sequence	5341	L1P1_orf2	nr	bacteria	|-__root|-__cellular_organisms|k__Bacteria|-__PVC_group|p__Chlamydiae|c__Chlamydiia|o__Chlamydiales|f__Chlamydiaceae|-__Chlamydia/Chlamydophila_group|g__Chlamydia|s__Chlamydia_abortus
NZ_FTZV01000294.1:1314-3058	gi|1179645899|embl|SME39480.1|	100	337	0	0	1230	220	1	337	2e-136	495	SME39480.1	L1 transposable element [Klebsiella pneumoniae]	338	live	573	2017-04-13	2017-04-13		Klebsiella pneumoniae	Bacteria	1	FWYR01000054.1:245-1261	FWYR01000054.1	Klebsiella pneumoniae isolate KP03M genome assembly, contig: gnlProkkacontig000054, whole genome shotgun sequence	5193	L1HS_5end	nr	bacteria	|-__root|-__cellular_organisms|k__Bacteria|p__Proteobacteria|c__Gammaproteobacteria|o__Enterobacterales|f__Enterobacteriaceae|g__Klebsiella|s__Klebsiella_pneumoniae
NZ_PYPZ01000098.1:2341-5634	gi|1179645900|embl|SME39517.1|	100	1098	0	0	1	3294	1	1098	0	1801.2	SME39517.1	exodeoxyribonuclease III [Klebsiella pneumoniae]	1275	live	573	2017-04-13	2017-04-13		Klebsiella pneumoniae	Bacteria	1	FWYR01000054.1:1325-5152	FWYR01000054.1	Klebsiella pneumoniae isolate KP03M genome assembly, contig: gnlProkkacontig000054, whole genome shotgun sequence	5193	L1P1_orf2	nr	bacteria	|-__root|-__cellular_organisms|k__Bacteria|p__Proteobacteria|c__Gammaproteobacteria|o__Enterobacterales|f__Enterobacteriaceae|g__Klebsiella|s__Klebsiella_pneumoniae
NZ_NPDO01000024.1:945-4238	gi|1296497075|ref|WP_100739103.1|	100	1098	0	0	3294	1	1	1098	0	2217.6	WP_100739103.1	DUF1725 domain-containing protein [Leptospira sp. JW3-C-A1]	1275	live	2023180	2017-12-07	2018-02-02		Leptospira sp. JW3-C-A1	Bacteria	2	NZ_NPDO01000024.1:411-4238,NPDO01000024.1:411-4238	NZ_NPDO01000024.1	Leptospira sp. JW3-C-A1 contig_24, whole genome shotgun sequence	5124	L1P1_orf2	nr	bacteria	|-__root|-__cellular_organisms|k__Bacteria|p__Spirochaetes|c__Spirochaetia|-__Leptospirales|f__Leptospiraceae|g__Leptospira|s__Leptospira_sp._JW3-C-A1
NZ_FTZV01000294.1:1314-3058	gi|1296497078|ref|WP_100739104.1|	95.59	272	12	0	1032	217	2	273	7e-134	486.9	WP_100739104.1	hypothetical protein, partial [Leptospira sp. JW3-C-A1]	273	live	2023180	2017-12-07	2017-12-07		Leptospira sp. JW3-C-A1	Bacteria	2	NZ_NPDO01000024.1:4302-5124,NPDO01000024.1:4302-5124	NZ_NPDO01000024.1	Leptospira sp. JW3-C-A1 contig_24, whole genome shotgun sequence	5124	L1HS_5end	nr	bacteria	|-__root|-__cellular_organisms|k__Bacteria|p__Spirochaetes|c__Spirochaetia|-__Leptospirales|f__Leptospiraceae|g__Leptospira|s__Leptospira_sp._JW3-C-A1
NZ_LZRE01000006.1:4116-4877	gi|1096224794|ref|WP_071170933.1|	100	200	0	0	681	82	1	200	2e-118	433.7	WP_071170933.1	DUF1725 domain-containing protein [Chlamydia psittaci]	200	live	83554	2016-11-02	2017-07-12		Chlamydia psittaci	Bacteria	2	NZ_LZRE01000006.1:4194-4796,LZRE01000006.1:4194-4796	NZ_LZRE01000006.1	Chlamydia psittaci strain Ho Re upper contig0006, whole genome shotgun sequence	5120	L1HS_3end	nr	bacteria	|-__root|-__cellular_organisms|k__Bacteria|-__PVC_group|p__Chlamydiae|c__Chlamydiia|o__Chlamydiales|f__Chlamydiaceae|-__Chlamydia/Chlamydophila_group|g__Chlamydia|s__Chlamydia_psittaci
NZ_ALQR01000038.1:907-4200	gi|446070175|ref|WP_000148030.1|	100	1098	0	0	1	3294	1	1098	0	2214.9	WP_000148030.1	DUF1725 domain-containing protein [Streptococcus agalactiae]	1275	live	1311	2013-02-04	2017-12-12		Streptococcus agalactiae	Bacteria	2	NZ_ALQR01000038.1:907-4734,ALQR01000038.1:907-4734	NZ_ALQR01000038.1	Streptococcus agalactiae CCUG 37742 ctg7180000003093, whole genome shotgun sequence	4806	L1P1_orf2	nr	bacteria	|-__root|-__cellular_organisms|k__Bacteria|-__Terrabacteria_group|p__Firmicutes|c__Bacilli|o__Lactobacillales|f__Streptococcaceae|g__Streptococcus|s__Streptococcus_agalactiae
NZ_CGZQ01000069.1:1-1661	gi|446474645|ref|WP_000552499.1|	99.29	280	2	0	617	1456	1	280	1e-143	519.2	WP_000552499.1	hypothetical protein, partial [Streptococcus agalactiae]	280	live	1311	2013-02-04	2013-05-15		Streptococcus agalactiae	Bacteria	1	NZ_ALQR01000038.1:1-843	NZ_ALQR01000038.1	Streptococcus agalactiae CCUG 37742 ctg7180000003093, whole genome shotgun sequence	4806	L1HS_5end	nr	bacteria	|-__root|-__cellular_organisms|k__Bacteria|-__Terrabacteria_group|p__Firmicutes|c__Bacilli|o__Lactobacillales|f__Streptococcaceae|g__Streptococcus|s__Streptococcus_agalactiae
NZ_FSLH01000040.1:378-548	gi|1037158193|embl|SBT52372.1|	97.22	36	1	0	1	108	5	40	3e-12	79	SBT52372.1	rhoptry-associated membrane antigen, putative (RAMA) [Plasmodium ovale wallikeri]	736	live	864142	2016-06-16	2016-06-16		Plasmodium ovale wallikeri	Eukaryota	1	FLRE01000297.1:1-4171	FLRE01000297.1	Plasmodium ovale wallikeri genome assembly, contig: contig297, whole genome shotgun sequence	4750	ALR	nr	bacteria	|-__root|-__cellular_organisms|k__Eukaryota|-__Alveolata|p__Apicomplexa|c__Aconoidasida|o__Haemosporida|f__Plasmodiidae|g__Plasmodium|-__Plasmodium_(Plasmodium)|s__Plasmodium_ovale|-__Plasmodium_ovale_wallikeri
NZ_CGZQ01000069.1:1-1661	gi|884243904|embl|CJZ86355.1|	99.24	262	0	1	713	1492	1	262	2e-122	448.4	CJZ86355.1	L1 transposable element [Streptococcus pneumoniae]	262	live	1313	2015-03-22	2015-06-12		Streptococcus pneumoniae	Bacteria	1	CMHF01000049.1:3796-4584	CMHF01000049.1	Streptococcus pneumoniae genome assembly 7038_5#15, scaffold ERS022477SCcontig000049, whole genome shotgun sequence	4710	L1HS_5end	nr	bacteria	|-__root|-__cellular_organisms|k__Bacteria|-__Terrabacteria_group|p__Firmicutes|c__Bacilli|o__Lactobacillales|f__Streptococcaceae|g__Streptococcus|s__Streptococcus_pneumoniae
NZ_LONH01000058.1:2101-5394	gi|1028766282|gb|OAK34190.1|	98.71	931	12	0	502	3294	1	931	0	1853.6	OAK34190.1	endonuclease [Bacillus wiedmannii]	1108	live	1890302	2016-05-17	2016-09-08		Bacillus wiedmannii	Bacteria	1	LXFS01000052.1:1243-4569	LXFS01000052.1	Bacillus wiedmannii strain FSL P2-0558 NODE_50, whole genome shotgun sequence	4667	L1P1_orf2	nr	bacteria	|-__root|-__cellular_organisms|k__Bacteria|-__Terrabacteria_group|p__Firmicutes|c__Bacilli|o__Bacillales|f__Bacillaceae|g__Bacillus|-__Bacillus_cereus_group|s__Bacillus_wiedmannii
NZ_LONH01000058.1:2101-5394	gi|1173406691|ref|WP_081257577.1|	98.72	1098	14	0	1	3294	1	1098	0	2181.4	WP_081257577.1	DUF1725 domain-containing protein [Bacillus wiedmannii]	1275	live	1890302	2017-04-05	2017-12-12		Bacillus wiedmannii	Bacteria	1	NZ_LXFS01000052.1:742-4569	NZ_LXFS01000052.1	Bacillus wiedmannii strain FSL P2-0558 NODE_50, whole genome shotgun sequence	4667	L1P1_orf2	nr	bacteria	|-__root|-__cellular_organisms|k__Bacteria|-__Terrabacteria_group|p__Firmicutes|c__Bacilli|o__Bacillales|f__Bacillaceae|g__Bacillus|-__Bacillus_cereus_group|s__Bacillus_wiedmannii
NZ_PVDJ01000040.1:57-227	gi|1037157397|embl|SBT55340.1|	95.45	44	2	0	1	132	346	389	2e-15	89.7	SBT55340.1	PIR Superfamily Protein [Plasmodium ovale wallikeri]	389	live	864142	2016-06-16	2016-06-16		Plasmodium ovale wallikeri	Eukaryota	1	FLRE01000804.1:2809-4607	FLRE01000804.1	Plasmodium ovale wallikeri genome assembly, contig: contig804, whole genome shotgun sequence	4607	ALR	nr	bacteria	|-__root|-__cellular_organisms|k__Eukaryota|-__Alveolata|p__Apicomplexa|c__Aconoidasida|o__Haemosporida|f__Plasmodiidae|g__Plasmodium|-__Plasmodium_(Plasmodium)|s__Plasmodium_ovale|-__Plasmodium_ovale_wallikeri
NZ_FPIK01000009.1:2551-3360	gi|1197019139|ref|WP_086430344.1|	96.58	146	5	0	652	215	13	158	3e-72	280.4	WP_086430344.1	hypothetical protein [Chlamydia abortus]	158	live	83555	2017-05-24	2017-05-24		Chlamydia abortus	Bacteria	1	NZ_FQLG01000007.1:910-1386	NZ_FQLG01000007.1	Chlamydia abortus strain 09_05, whole genome shotgun sequence	4545	L1HS_5end	nr	bacteria	|-__root|-__cellular_organisms|k__Bacteria|-__PVC_group|p__Chlamydiae|c__Chlamydiia|o__Chlamydiales|f__Chlamydiaceae|-__Chlamydia/Chlamydophila_group|g__Chlamydia|s__Chlamydia_abortus
NZ_FQLM01000003.1:4122-5041	gi|1197019140|ref|WP_086430345.1|	95.76	236	10	0	918	211	23	258	8e-124	451.8	WP_086430345.1	hypothetical protein [Chlamydia abortus]	258	live	83555	2017-05-24	2017-05-24		Chlamydia abortus	Bacteria	1	NZ_FQLG01000007.1:1683-2459	NZ_FQLG01000007.1	Chlamydia abortus strain 09_05, whole genome shotgun sequence	4545	L1PBa_5end	nr	bacteria	|-__root|-__cellular_organisms|k__Bacteria|-__PVC_group|p__Chlamydiae|c__Chlamydiia|o__Chlamydiales|f__Chlamydiaceae|-__Chlamydia/Chlamydophila_group|g__Chlamydia|s__Chlamydia_abortus
NZ_FPIK01000009.1:93-776	gi|1197019141|ref|WP_086430346.1|	99.45	182	1	0	683	138	130	311	8e-97	361.3	WP_086430346.1	hypothetical protein [Chlamydia abortus]	314	live	83555	2017-05-24	2017-05-24		Chlamydia abortus	Bacteria	2	NZ_FQLG01000007.1:2411-3355,FQLG01000007.1:2411-3355	NZ_FQLG01000007.1	Chlamydia abortus strain 09_05, whole genome shotgun sequence	4545	L1PBa_5end	nr	bacteria	|-__root|-__cellular_organisms|k__Bacteria|-__PVC_group|p__Chlamydiae|c__Chlamydiia|o__Chlamydiales|f__Chlamydiaceae|-__Chlamydia/Chlamydophila_group|g__Chlamydia|s__Chlamydia_abortus
NZ_FPIK01000009.1:93-776	gi|1190721129|embl|SFW04654.1|	100	227	0	0	683	3	27	253	2e-124	453	SFW04654.1	L1 transposable element [Chlamydia abortus]	268	live	83555	2017-05-10	2017-05-10		Chlamydia abortus	Bacteria	1	FPIK01000009.1:47-853	FPIK01000009.1	Chlamydophila abortus strain 83/12 genome assembly, contig: ERS003312SCcontig000009, whole genome shotgun sequence	4529	L1PBa_5end	nr	bacteria	|-__root|-__cellular_organisms|k__Bacteria|-__PVC_group|p__Chlamydiae|c__Chlamydiia|o__Chlamydiales|f__Chlamydiaceae|-__Chlamydia/Chlamydophila_group|g__Chlamydia|s__Chlamydia_abortus
NZ_FQLM01000003.1:4122-5041	gi|1190721131|embl|SFW04669.1|	95.65	230	10	0	900	211	80	309	1e-120	441	SFW04669.1	L1 transposable element [Chlamydia abortus]	309	live	83555	2017-05-10	2017-05-10		Chlamydia abortus	Bacteria	1	FPIK01000009.1:1792-2721	FPIK01000009.1	Chlamydophila abortus strain 83/12 genome assembly, contig: ERS003312SCcontig000009, whole genome shotgun sequence	4529	L1PBa_5end	nr	bacteria	|-__root|-__cellular_organisms|k__Bacteria|-__PVC_group|p__Chlamydiae|c__Chlamydiia|o__Chlamydiales|f__Chlamydiaceae|-__Chlamydia/Chlamydophila_group|g__Chlamydia|s__Chlamydia_abortus
NZ_FPIK01000009.1:93-776	gi|1203192417|ref|WP_087672091.1|	100	227	0	0	683	3	141	367	2e-124	453	WP_087672091.1	hypothetical protein [Chlamydia abortus]	382	live	83555	2017-06-09	2017-06-09		Chlamydia abortus	Bacteria	1	NZ_FPIK01000009.1:47-1195	NZ_FPIK01000009.1	Chlamydia abortus strain 83/12, whole genome shotgun sequence	4529	L1PBa_5end	nr	bacteria	|-__root|-__cellular_organisms|k__Bacteria|-__PVC_group|p__Chlamydiae|c__Chlamydiia|o__Chlamydiales|f__Chlamydiaceae|-__Chlamydia/Chlamydophila_group|g__Chlamydia|s__Chlamydia_abortus
NZ_FPIJ01000010.1:1847-3180	gi|1203192418|ref|WP_087672092.1|	97.79	181	4	0	1332	790	9	189	4e-96	360.9	WP_087672092.1	hypothetical protein [Chlamydia abortus]	196	live	83555	2017-06-09	2017-06-09		Chlamydia abortus	Bacteria	2	NZ_FPIK01000009.1:1161-1751,FPIK01000009.1:1161-1751	NZ_FPIK01000009.1	Chlamydia abortus strain 83/12, whole genome shotgun sequence	4529	L1P1_orf2	nr	bacteria	|-__root|-__cellular_organisms|k__Bacteria|-__PVC_group|p__Chlamydiae|c__Chlamydiia|o__Chlamydiales|f__Chlamydiaceae|-__Chlamydia/Chlamydophila_group|g__Chlamydia|s__Chlamydia_abortus
NZ_FQLM01000003.1:4122-5041	gi|1203192419|ref|WP_087672093.1|	96.19	236	9	0	918	211	136	371	4e-124	453	WP_087672093.1	hypothetical protein [Chlamydia abortus]	371	live	83555	2017-06-09	2017-06-09		Chlamydia abortus	Bacteria	2	NZ_FPIK01000009.1:2762-3877,FPIK01000009.1:2762-3877	NZ_FPIK01000009.1	Chlamydia abortus strain 83/12, whole genome shotgun sequence	4529	L1PBa_5end	nr	bacteria	|-__root|-__cellular_organisms|k__Bacteria|-__PVC_group|p__Chlamydiae|c__Chlamydiia|o__Chlamydiales|f__Chlamydiaceae|-__Chlamydia/Chlamydophila_group|g__Chlamydia|s__Chlamydia_abortus
NZ_LPSC01000028.1:519-683	gi|881214958|embl|CJE27858.1|	97.78	45	1	0	1	135	1	45	7e-19	100.9	CJE27858.1	Uncharacterised protein [Streptococcus pneumoniae]	45	live	1313	2015-03-21	2015-06-13		Streptococcus pneumoniae	Bacteria	3	CKYY01000039.1:2546-2683,CMHF01000056.1:2689-2826,FTZV01000200.1:6013-6150	CKYY01000039.1	Streptococcus pneumoniae genome assembly 6840_1#21, scaffold ERS021283SCcontig000039, whole genome shotgun sequence	4410	HSATII	nr	archaea	|-__root|-__cellular_organisms|k__Bacteria|-__Terrabacteria_group|p__Firmicutes|c__Bacilli|o__Lactobacillales|f__Streptococcaceae|g__Streptococcus|s__Streptococcus_pneumoniae
NZ_FTZV01000200.1:195-361	gi|881214962|embl|CJE27995.1|	100	55	0	0	3	167	21	75	1e-24	120.2	CJE27995.1	Uncharacterised protein [Streptococcus pneumoniae]	112	live	1313	2015-03-21	2015-06-13		Streptococcus pneumoniae	Bacteria	1	CKYY01000039.1:3308-3646	CKYY01000039.1	Streptococcus pneumoniae genome assembly 6840_1#21, scaffold ERS021283SCcontig000039, whole genome shotgun sequence	4410	HSATII	nr	bacteria	|-__root|-__cellular_organisms|k__Bacteria|-__Terrabacteria_group|p__Firmicutes|c__Bacilli|o__Lactobacillales|f__Streptococcaceae|g__Streptococcus|s__Streptococcus_pneumoniae
NZ_FSLH01000033.1:267-431	gi|881214963|embl|CJE28014.1|	100	41	0	0	165	43	6	46	2e-15	89.7	CJE28014.1	Uncharacterised protein [Streptococcus pneumoniae]	46	live	1313	2015-03-21	2015-06-13		Streptococcus pneumoniae	Bacteria	1	CKYY01000039.1:3637-3777	CKYY01000039.1	Streptococcus pneumoniae genome assembly 6840_1#21, scaffold ERS021283SCcontig000039, whole genome shotgun sequence	4410	HSATII	nr	bacteria	|-__root|-__cellular_organisms|k__Bacteria|-__Terrabacteria_group|p__Firmicutes|c__Bacilli|o__Lactobacillales|f__Streptococcaceae|g__Streptococcus|s__Streptococcus_pneumoniae
NZ_FTZV01000200.1:6502-6669	gi|912654296|ref|WP_050218424.1|	100	56	0	0	1	168	7	62	1e-25	123.6	WP_050218424.1	hypothetical protein [Streptococcus pneumoniae]	65	live	1313	2015-08-05	2015-08-05		Streptococcus pneumoniae	Bacteria	3	NZ_CKYY01000039.1:3017-3214,NZ_CMHF01000056.1:3160-3357,CLCE01000362.1:287-484	NZ_CKYY01000039.1	Streptococcus pneumoniae strain SMRU1773, whole genome shotgun sequence	4410	HSATII	nr	bacteria	|-__root|-__cellular_organisms|k__Bacteria|-__Terrabacteria_group|p__Firmicutes|c__Bacilli|o__Lactobacillales|f__Streptococcaceae|g__Streptococcus|s__Streptococcus_pneumoniae
NZ_JPWZ01000242.1:124-287	gi|912673040|ref|WP_050226856.1|	100	54	0	0	2	163	19	72	6e-25	120.9	WP_050226856.1	hypothetical protein [Streptococcus pneumoniae]	117	live	1313	2015-08-05	2015-08-05		Streptococcus pneumoniae	Bacteria	1	NZ_CKYY01000039.1:3411-3764	NZ_CKYY01000039.1	Streptococcus pneumoniae strain SMRU1773, whole genome shotgun sequence	4410	HSATII	nr	bacteria	|-__root|-__cellular_organisms|k__Bacteria|-__Terrabacteria_group|p__Firmicutes|c__Bacilli|o__Lactobacillales|f__Streptococcaceae|g__Streptococcus|s__Streptococcus_pneumoniae
NZ_LXQV01000030.1:4-154	gi|912673041|ref|WP_050226857.1|	100	48	0	0	151	8	32	79	2e-21	109	WP_050226857.1	hypothetical protein [Streptococcus pneumoniae]	79	live	1313	2015-08-05	2015-08-05		Streptococcus pneumoniae	Bacteria	4	NZ_CKYY01000039.1:3905-4144,NZ_CMHF01000059.1:145-384,NZ_CMKS01000050.1:5239-5478,FTZV01000200.1:734-973	NZ_CKYY01000039.1	Streptococcus pneumoniae strain SMRU1773, whole genome shotgun sequence	4410	HSATII	nr	bacteria	|-__root|-__cellular_organisms|k__Bacteria|-__Terrabacteria_group|p__Firmicutes|c__Bacilli|o__Lactobacillales|f__Streptococcaceae|g__Streptococcus|s__Streptococcus_pneumoniae
NZ_FTZV01000305.1:1999-2169	gi|884243889|embl|CJZ86990.1|	100	57	0	0	1	171	31	87	6e-28	131	CJZ86990.1	Uncharacterised protein [Streptococcus pneumoniae]	125	live	1313	2015-03-22	2015-06-12		Streptococcus pneumoniae	Bacteria	1	CMHF01000052.1:3142-3519	CMHF01000052.1	Streptococcus pneumoniae genome assembly 7038_5#15, scaffold ERS022477SCcontig000052, whole genome shotgun sequence	4376	ALR	nr	bacteria	|-__root|-__cellular_organisms|k__Bacteria|-__Terrabacteria_group|p__Firmicutes|c__Bacilli|o__Lactobacillales|f__Streptococcaceae|g__Streptococcus|s__Streptococcus_pneumoniae
NZ_FTZV01000316.1:273-442	gi|1037157642|embl|SBT54812.1|	97.62	42	1	0	1	126	2	43	2e-14	86.3	SBT54812.1	PIR Superfamily Protein [Plasmodium ovale wallikeri]	1199	live	864142	2016-06-16	2016-06-16		Plasmodium ovale wallikeri	Eukaryota	1	FLRE01000662.1:1-4288	FLRE01000662.1	Plasmodium ovale wallikeri genome assembly, contig: contig662, whole genome shotgun sequence	4288	ALR	nr	bacteria	|-__root|-__cellular_organisms|k__Eukaryota|-__Alveolata|p__Apicomplexa|c__Aconoidasida|o__Haemosporida|f__Plasmodiidae|g__Plasmodium|-__Plasmodium_(Plasmodium)|s__Plasmodium_ovale|-__Plasmodium_ovale_wallikeri
NZ_PYPZ01000358.1:41-211	gi|1037152818|embl|SBT59372.1|	100	45	0	0	169	35	69	113	6e-17	94.4	SBT59372.1	hypothetical protein POVWA2_095510 [Plasmodium ovale wallikeri]	113	live	864142	2016-06-16	2016-06-16		Plasmodium ovale wallikeri	Eukaryota	1	FLRE01003250.1:2233-2574	FLRE01003250.1	Plasmodium ovale wallikeri genome assembly, contig: contig3250, whole genome shotgun sequence	4282	ALR	nr	bacteria	|-__root|-__cellular_organisms|k__Eukaryota|-__Alveolata|p__Apicomplexa|c__Aconoidasida|o__Haemosporida|f__Plasmodiidae|g__Plasmodium|-__Plasmodium_(Plasmodium)|s__Plasmodium_ovale|-__Plasmodium_ovale_wallikeri
NZ_CGZQ01000144.1:144-308	gi|1037152819|embl|SBT59373.1|	100	54	0	0	164	3	8	61	2e-23	115.9	SBT59373.1	hypothetical protein POVWA2_095520 [Plasmodium ovale wallikeri]	129	live	864142	2016-06-16	2016-06-16		Plasmodium ovale wallikeri	Eukaryota	1	FLRE01003250.1:3277-3936	FLRE01003250.1	Plasmodium ovale wallikeri genome assembly, contig: contig3250, whole genome shotgun sequence	4282	ALR	nr	bacteria	|-__root|-__cellular_organisms|k__Eukaryota|-__Alveolata|p__Apicomplexa|c__Aconoidasida|o__Haemosporida|f__Plasmodiidae|g__Plasmodium|-__Plasmodium_(Plasmodium)|s__Plasmodium_ovale|-__Plasmodium_ovale_wallikeri
NZ_FQLK01000003.1:1935-2535	gi|815037457|embl|CRH56878.1|	100	199	0	0	599	3	136	334	6e-108	397.5	CRH56878.1	L1 transposable element [Chlamydia trachomatis]	348	live	813	2015-04-22	2015-06-13		Chlamydia trachomatis	Bacteria	1	CVNV01000026.1:2741-3787	CVNV01000026.1	Chlamydia trachomatis genome assembly 7501_6#60, scaffold ERS082929SCcontig000026, whole genome shotgun sequence	4268	L1PBa_5end	nr	bacteria	|-__root|-__cellular_organisms|k__Bacteria|-__PVC_group|p__Chlamydiae|c__Chlamydiia|o__Chlamydiales|f__Chlamydiaceae|-__Chlamydia/Chlamydophila_group|g__Chlamydia|s__Chlamydia_trachomatis
NZ_LPSC01000024.1:1-1925	gi|954265049|gb|KRX57830.1|	97.14	35	1	0	1712	1608	1	35	1e-09	74.3	KRX57830.1	hypothetical protein T06_3624 [Trichinella sp. T6]	112	live	92179	2015-11-24	2015-11-24		Trichinella sp. T6	Eukaryota	1	JYDK01000622.1:2075-3188	JYDK01000622.1	Trichinella sp. T6 isolate ISS34 scaffold622s, whole genome shotgun sequence	4167	L1P1_orf2	nr	archaea	|-__root|-__cellular_organisms|k__Eukaryota|-__Opisthokonta|-__Metazoa|-__Eumetazoa|-__Bilateria|-__Protostomia|-__Ecdysozoa|p__Nematoda|c__Enoplea|-__Dorylaimia|o__Trichinellida|f__Trichinellidae|g__Trichinella|s__Trichinella_sp._T6
NZ_JUHZ01000053.1:599-3892	gi|954265050|gb|KRX57831.1|	99.36	1098	7	0	3294	1	1	1098	0	2197.5	KRX57831.1	LINE-1 reverse transcriptase -like protein [Trichinella sp. T6]	1275	live	92179	2015-11-24	2015-11-24		Trichinella sp. T6	Eukaryota	1	JYDK01000622.1:256-4083	JYDK01000622.1	Trichinella sp. T6 isolate ISS34 scaffold622s, whole genome shotgun sequence	4167	L1P1_orf2	nr	bacteria	|-__root|-__cellular_organisms|k__Eukaryota|-__Opisthokonta|-__Metazoa|-__Eumetazoa|-__Bilateria|-__Protostomia|-__Ecdysozoa|p__Nematoda|c__Enoplea|-__Dorylaimia|o__Trichinellida|f__Trichinellidae|g__Trichinella|s__Trichinella_sp._T6
NZ_FPMA01000004.1:1-1333	gi|1190697079|embl|SGA20571.1|	100	243	0	0	899	171	1	243	3e-119	437.6	SGA20571.1	L1 transposable element [Chlamydia abortus]	243	live	83555	2017-05-10	2017-05-10		Chlamydia abortus	Bacteria	2	FPMI01000004.1:3423-4154,FPMS01000006.1:2299-3030	FPMI01000004.1	Chlamydia abortus strain C11_98 genome assembly, contig: ERS067038SCcontig000004, whole genome shotgun sequence	4158	L1HS_5end	nr	bacteria	|-__root|-__cellular_organisms|k__Bacteria|-__PVC_group|p__Chlamydiae|c__Chlamydiia|o__Chlamydiales|f__Chlamydiaceae|-__Chlamydia/Chlamydophila_group|g__Chlamydia|s__Chlamydia_abortus
NZ_FPMI01000004.1:66-3359	gi|1196961331|ref|WP_086384832.1|	100	1098	0	0	3294	1	1	1098	0	2181.8	WP_086384832.1	endonuclease, partial [Chlamydia abortus]	1120	live	83555	2017-05-24	2017-05-24		Chlamydia abortus	Bacteria	1	NZ_FPMI01000004.1:1-3359	NZ_FPMI01000004.1	Chlamydia abortus strain C11_98, whole genome shotgun sequence	4158	L1P1_orf2	nr	bacteria	|-__root|-__cellular_organisms|k__Bacteria|-__PVC_group|p__Chlamydiae|c__Chlamydiia|o__Chlamydiales|f__Chlamydiaceae|-__Chlamydia/Chlamydophila_group|g__Chlamydia|s__Chlamydia_abortus
NZ_FPIK01000013.1:2679-3837	gi|1190682796|embl|SGW52872.1|	100	210	0	0	2	631	9	218	3e-118	434.1	SGW52872.1	exonuclease III [Chlamydia abortus]	232	live	83555	2017-05-10	2017-05-10		Chlamydia abortus	Bacteria	1	FQLJ01000003.1:2488-3186	FQLJ01000003.1	Chlamydia abortus strain 09_01 genome assembly, contig: ERS067068SCcontig000003, whole genome shotgun sequence	4112	L1P1_orf2	nr	bacteria	|-__root|-__cellular_organisms|k__Bacteria|-__PVC_group|p__Chlamydiae|c__Chlamydiia|o__Chlamydiales|f__Chlamydiaceae|-__Chlamydia/Chlamydophila_group|g__Chlamydia|s__Chlamydia_abortus
NZ_FQLK01000003.1:1935-2535	gi|1203192423|ref|WP_087672097.1|	100	199	0	0	599	3	122	320	6e-108	397.5	WP_087672097.1	hypothetical protein [Chlamydia abortus]	331	live	83555	2017-06-09	2017-06-09		Chlamydia abortus	Bacteria	3	NZ_FPIK01000012.1:262-1257,CVNU01000042.1:852-1847,FPIK01000012.1:262-1257	NZ_FPIK01000012.1	Chlamydia abortus strain 83/12, whole genome shotgun sequence	4096	L1PBa_5end	nr	bacteria	|-__root|-__cellular_organisms|k__Bacteria|-__PVC_group|p__Chlamydiae|c__Chlamydiia|o__Chlamydiales|f__Chlamydiaceae|-__Chlamydia/Chlamydophila_group|g__Chlamydia|s__Chlamydia_abortus
NZ_FPLU01000003.1:89-926	gi|1190696056|embl|SGA28226.1|	100	227	0	0	838	158	60	286	5e-135	488.8	SGA28226.1	Retron-type reverse transcriptase [Chlamydia abortus]	286	live	83555	2017-05-10	2017-05-10		Chlamydia abortus	Bacteria	1	FPLU01000003.1:243-1103	FPLU01000003.1	Chlamydia abortus strain 99DC1 genome assembly, contig: ERS067048SCcontig000003, whole genome shotgun sequence	4095	L1HS_3end	nr	bacteria	|-__root|-__cellular_organisms|k__Bacteria|-__PVC_group|p__Chlamydiae|c__Chlamydiia|o__Chlamydiales|f__Chlamydiaceae|-__Chlamydia/Chlamydophila_group|g__Chlamydia|s__Chlamydia_abortus
NZ_FPLU01000003.1:1121-4095	gi|1190696057|embl|SGA28238.1|	100	959	0	0	2882	6	1	959	0	1894.8	SGA28238.1	Retron-type reverse transcriptase [Chlamydia abortus]	973	live	83555	2017-05-10	2017-05-10		Chlamydia abortus	Bacteria	1	FPLU01000003.1:1081-4002	FPLU01000003.1	Chlamydia abortus strain 99DC1 genome assembly, contig: ERS067048SCcontig000003, whole genome shotgun sequence	4095	L1P1_orf2	nr	bacteria	|-__root|-__cellular_organisms|k__Bacteria|-__PVC_group|p__Chlamydiae|c__Chlamydiia|o__Chlamydiales|f__Chlamydiaceae|-__Chlamydia/Chlamydophila_group|g__Chlamydia|s__Chlamydia_abortus
NZ_FPLU01000003.1:89-926	gi|1196960028|ref|WP_086384179.1|	100	200	0	0	757	158	1	200	2e-118	433.7	WP_086384179.1	DUF1725 domain-containing protein [Chlamydia abortus]	200	live	83555	2017-05-24	2017-07-08		Chlamydia abortus	Bacteria	2	NZ_FPLU01000003.1:243-845,NZ_FPMS01000009.1:96-698	NZ_FPLU01000003.1	Chlamydia abortus strain 99DC1, whole genome shotgun sequence	4095	L1HS_3end	nr	bacteria	|-__root|-__cellular_organisms|k__Bacteria|-__PVC_group|p__Chlamydiae|c__Chlamydiia|o__Chlamydiales|f__Chlamydiaceae|-__Chlamydia/Chlamydophila_group|g__Chlamydia|s__Chlamydia_abortus
NZ_JUHZ01000053.1:599-3892	gi|757657895|ref|WP_042896357.1|	100	1098	0	0	3294	1	1	1098	0	2212.6	WP_042896357.1	DUF1725 domain-containing protein [Klebsiella aerogenes]	1275	live	548	2015-02-17	2017-12-13		Klebsiella aerogenes	Bacteria	2	NZ_JUHZ01000053.1:65-3892,JUHZ01000053.1:65-3892	NZ_JUHZ01000053.1	Klebsiella aerogenes strain ND17 contig54, whole genome shotgun sequence	4039	L1P1_orf2	nr	bacteria	|-__root|-__cellular_organisms|k__Bacteria|p__Proteobacteria|c__Gammaproteobacteria|o__Enterobacterales|f__Enterobacteriaceae|g__Klebsiella|s__Klebsiella_aerogenes
NZ_JHDX01000037.1:491-657	gi|1037143364|embl|SBT57149.1|	100	38	0	0	167	54	984	1021	5e-14	84.7	SBT57149.1	STP1 protein [Plasmodium ovale wallikeri]	1021	live	864142	2016-06-16	2016-06-16		Plasmodium ovale wallikeri	Eukaryota	1	FLRD01001393.1:173-4024	FLRD01001393.1	Plasmodium ovale wallikeri genome assembly, contig: contig1393, whole genome shotgun sequence	4024	ALR	nr	bacteria	|-__root|-__cellular_organisms|k__Eukaryota|-__Alveolata|p__Apicomplexa|c__Aconoidasida|o__Haemosporida|f__Plasmodiidae|g__Plasmodium|-__Plasmodium_(Plasmodium)|s__Plasmodium_ovale|-__Plasmodium_ovale_wallikeri
NZ_NQTR01000020.1:1-3214	gi|1285159862|ref|WP_100485373.1|	100	1071	0	0	2	3214	1	1071	0	2160.6	WP_100485373.1	DUF1725 domain-containing protein, partial [Mycobacteroides abscessus]	1248	live	36809	2017-12-03	2017-12-14		Mycobacteroides abscessus	Bacteria	1	NZ_NQTR01000020.1:1-3748	NZ_NQTR01000020.1	Mycobacteroides abscessus subsp. abscessus strain 146 146_20, whole genome shotgun sequence	4008	L1P1_orf2	nr	bacteria	|-__root|-__cellular_organisms|k__Bacteria|-__Terrabacteria_group|p__Actinobacteria|c__Actinobacteria|o__Corynebacteriales|f__Mycobacteriaceae|g__Mycobacteroides|s__Mycobacteroides_abscessus
NZ_JUIA01000040.1:115-3408	gi|1114009093|ref|WP_072035445.1|	100	1098	0	0	1	3294	1	1098	0	2214.9	WP_072035445.1	DUF1725 domain-containing protein [Enterobacter hormaechei]	1275	live	158836	2016-12-10	2017-12-12		Enterobacter hormaechei	Bacteria	1	NZ_JUIA01000040.1:115-3942	NZ_JUIA01000040.1	Enterobacter hormaechei subsp. oharae strain ND19 contig40, whole genome shotgun sequence	4001	L1P1_orf2	nr	bacteria	|-__root|-__cellular_organisms|k__Bacteria|p__Proteobacteria|c__Gammaproteobacteria|o__Enterobacterales|f__Enterobacteriaceae|g__Enterobacter|-__Enterobacter_cloacae_complex|s__Enterobacter_hormaechei
NZ_JUIA01000040.1:115-3408	gi|733532751|gb|KHM13631.1|	99.89	931	1	0	502	3294	1	931	0	1877.4	KHM13631.1	endonuclease [Enterobacter hormaechei subsp. oharae]	1108	live	301102	2014-12-16	2016-06-15		Enterobacter hormaechei subsp. oharae	Bacteria	1	JUIA01000040.1:616-3942	JUIA01000040.1	Enterobacter hormaechei subsp. oharae strain ND19 contig40, whole genome shotgun sequence	4001	L1P1_orf2	nr	bacteria	|-__root|-__cellular_organisms|k__Bacteria|p__Proteobacteria|c__Gammaproteobacteria|o__Enterobacterales|f__Enterobacteriaceae|g__Enterobacter|-__Enterobacter_cloacae_complex|s__Enterobacter_hormaechei|-__Enterobacter_hormaechei_subsp._oharae
NZ_QEYI01000017.1:69-3362	gi|1390922047|ref|WP_109158823.1|	100	1098	0	0	1	3294	1	1098	0	2212.6	WP_109158823.1	DUF1725 domain-containing protein [Aliiarcobacter skirrowii]	1257	live	28200	2018-05-22	2018-05-27		Aliiarcobacter skirrowii	Bacteria	2	NZ_QEYI01000017.1:69-3842,QEYI01000017.1:69-3842	NZ_QEYI01000017.1	Aliiarcobacter skirrowii strain 17-1208-2 NODE_17_length_3998_cov_6.92405, whole genome shotgun sequence	3998	L1P1_orf2	nr	bacteria	|-__root|-__cellular_organisms|k__Bacteria|p__Proteobacteria|-__delta/epsilon_subdivisions|c__Epsilonproteobacteria|o__Campylobacterales|f__Campylobacteraceae|-__Arcobacter_group|g__Aliiarcobacter|s__Aliiarcobacter_skirrowii
NZ_FQLM01000003.1:4122-5041	gi|1190701222|embl|SGW52405.1|	95.24	231	11	0	903	211	1	231	1e-120	441.4	SGW52405.1	L1 transposable element [Chlamydia abortus]	231	live	83555	2017-05-10	2017-05-10		Chlamydia abortus	Bacteria	2	FQLL01000004.1:1600-2295,FQLG01000007.1:1683-2378	FQLL01000004.1	Chlamydia abortus strain 09_03 genome assembly, contig: ERS067070SCcontig000004, whole genome shotgun sequence	3959	L1PBa_5end	nr	bacteria	|-__root|-__cellular_organisms|k__Bacteria|-__PVC_group|p__Chlamydiae|c__Chlamydiia|o__Chlamydiales|f__Chlamydiaceae|-__Chlamydia/Chlamydophila_group|g__Chlamydia|s__Chlamydia_abortus
NZ_FQLL01000004.1:2361-3011	gi|1190701223|embl|SGW52434.1|	100	216	0	0	3	650	10	225	1e-121	443.4	SGW52434.1	exonuclease III [Chlamydia abortus]	255	live	83555	2017-05-10	2017-05-10		Chlamydia abortus	Bacteria	1	FQLL01000004.1:2336-3103	FQLL01000004.1	Chlamydia abortus strain 09_03 genome assembly, contig: ERS067070SCcontig000004, whole genome shotgun sequence	3959	L1P1_orf2	nr	bacteria	|-__root|-__cellular_organisms|k__Bacteria|-__PVC_group|p__Chlamydiae|c__Chlamydiia|o__Chlamydiales|f__Chlamydiaceae|-__Chlamydia/Chlamydophila_group|g__Chlamydia|s__Chlamydia_abortus
NZ_FPIK01000009.1:93-776	gi|1196960479|ref|WP_086384458.1|	99.45	182	1	0	683	138	130	311	1e-96	360.9	WP_086384458.1	hypothetical protein [Chlamydia abortus]	313	live	83555	2017-05-24	2017-05-24		Chlamydia abortus	Bacteria	2	NZ_FQLL01000004.1:626-1567,FQLL01000004.1:626-1567	NZ_FQLL01000004.1	Chlamydia abortus strain 09_03, whole genome shotgun sequence	3959	L1PBa_5end	nr	bacteria	|-__root|-__cellular_organisms|k__Bacteria|-__PVC_group|p__Chlamydiae|c__Chlamydiia|o__Chlamydiales|f__Chlamydiaceae|-__Chlamydia/Chlamydophila_group|g__Chlamydia|s__Chlamydia_abortus
NZ_FQLM01000003.1:4122-5041	gi|1196960480|ref|WP_086384459.1|	95.76	236	10	0	918	211	44	279	8e-124	451.8	WP_086384459.1	hypothetical protein [Chlamydia abortus]	279	live	83555	2017-05-24	2017-05-24		Chlamydia abortus	Bacteria	1	NZ_FQLL01000004.1:1456-2295	NZ_FQLL01000004.1	Chlamydia abortus strain 09_03, whole genome shotgun sequence	3959	L1PBa_5end	nr	bacteria	|-__root|-__cellular_organisms|k__Bacteria|-__PVC_group|p__Chlamydiae|c__Chlamydiia|o__Chlamydiales|f__Chlamydiaceae|-__Chlamydia/Chlamydophila_group|g__Chlamydia|s__Chlamydia_abortus
NZ_FQLL01000004.1:2361-3011	gi|1196960481|ref|WP_086384460.1|	100	216	0	0	3	650	3	218	1e-121	443.4	WP_086384460.1	hypothetical protein [Chlamydia abortus]	248	live	83555	2017-05-24	2017-05-24		Chlamydia abortus	Bacteria	1	NZ_FQLL01000004.1:2357-3103	NZ_FQLL01000004.1	Chlamydia abortus strain 09_03, whole genome shotgun sequence	3959	L1P1_orf2	nr	bacteria	|-__root|-__cellular_organisms|k__Bacteria|-__PVC_group|p__Chlamydiae|c__Chlamydiia|o__Chlamydiales|f__Chlamydiaceae|-__Chlamydia/Chlamydophila_group|g__Chlamydia|s__Chlamydia_abortus
NZ_FPIK01000013.1:4819-5850	gi|815037435|embl|CRH56893.1|	100	210	0	0	1	630	9	218	2e-118	434.5	CRH56893.1	exonuclease III [Chlamydia trachomatis]	226	live	813	2015-04-22	2015-06-13		Chlamydia trachomatis	Bacteria	1	CVNV01000030.1:514-1194	CVNV01000030.1	Chlamydia trachomatis genome assembly 7501_6#60, scaffold ERS082929SCcontig000030, whole genome shotgun sequence	3915	L1P1_orf2	nr	bacteria	|-__root|-__cellular_organisms|k__Bacteria|-__PVC_group|p__Chlamydiae|c__Chlamydiia|o__Chlamydiales|f__Chlamydiaceae|-__Chlamydia/Chlamydophila_group|g__Chlamydia|s__Chlamydia_trachomatis
NZ_FPIJ01000009.1:1501-2185	gi|815037437|embl|CRH56895.1|	98.48	197	3	0	3	593	130	326	6e-104	384.8	CRH56895.1	L1 transposable element [Chlamydia trachomatis]	347	live	813	2015-04-22	2015-06-13		Chlamydia trachomatis	Bacteria	1	CVNV01000030.1:2499-3542	CVNV01000030.1	Chlamydia trachomatis genome assembly 7501_6#60, scaffold ERS082929SCcontig000030, whole genome shotgun sequence	3915	L1PBa_5end	nr	bacteria	|-__root|-__cellular_organisms|k__Bacteria|-__PVC_group|p__Chlamydiae|c__Chlamydiia|o__Chlamydiales|f__Chlamydiaceae|-__Chlamydia/Chlamydophila_group|g__Chlamydia|s__Chlamydia_trachomatis
NZ_FQLM01000003.1:4122-5041	gi|950202087|ref|WP_057247689.1|	95.76	236	10	0	918	211	136	371	8e-124	451.8	WP_057247689.1	hypothetical protein [Chlamydia abortus]	371	live	83555	2015-11-09	2017-05-26		Chlamydia abortus	Bacteria	20	NZ_CVNV01000030.1:1235-2350,NZ_FPIH01000010.1:378-1493,NZ_FPIJ01000009.1:8070-9185,NZ_FPIJ01000015.1:1492-2607,NZ_FPML01000009.1:379-1494,NZ_FPMM01000014.1:347-1462,NZ_FQSZ01000003.1:347-1462,AF081104.1:740-1855,AF081105.1:719-1834,AF081109.1:938-2053,AF081111.1:1028-2143,AB018705.1:1456-2571,CVNU01000037.1:1606-2721,CVNV01000030.1:1235-2350,FPIH01000010.1:378-1493,FPIJ01000009.1:8070-9185,FPIJ01…	NZ_CVNV01000030.1	Chlamydia trachomatis genome assembly 7501_6#60, scaffold ERS082929SCcontig000030, whole genome shotgun sequence	3915	L1PBa_5end	nr	bacteria	|-__root|-__cellular_organisms|k__Bacteria|-__PVC_group|p__Chlamydiae|c__Chlamydiia|o__Chlamydiales|f__Chlamydiaceae|-__Chlamydia/Chlamydophila_group|g__Chlamydia|s__Chlamydia_abortus
NZ_FPMI01000004.1:66-3359	gi|1196956000|ref|WP_086380391.1|	100	1000	0	0	3000	1	1	1000	0	1981.5	WP_086380391.1	DUF1725 domain-containing protein [Chlamydia abortus]	1177	live	83555	2017-05-24	2017-12-11		Chlamydia abortus	Bacteria	2	NZ_FPMA01000003.1:104-3637,FPMA01000003.1:104-3637	NZ_FPMA01000003.1	Chlamydia abortus strain 10DC83, whole genome shotgun sequence	3874	L1P1_orf2	nr	bacteria	|-__root|-__cellular_organisms|k__Bacteria|-__PVC_group|p__Chlamydiae|c__Chlamydiia|o__Chlamydiales|f__Chlamydiaceae|-__Chlamydia/Chlamydophila_group|g__Chlamydia|s__Chlamydia_abortus
NZ_FPIL01000019.1:1-969	gi|815037402|embl|CRH56918.1|	100	70	0	0	690	899	1	70	4e-32	147.5	CRH56918.1	Uncharacterised protein [Chlamydia trachomatis]	70	live	813	2015-04-22	2015-06-13		Chlamydia trachomatis	Bacteria	2	CVNV01000039.1:246-458,FPIL01000019.1:690-902	CVNV01000039.1	Chlamydia trachomatis genome assembly 7501_6#60, scaffold ERS082929SCcontig000039, whole genome shotgun sequence	3776	L1P1_orf2	nr	bacteria	|-__root|-__cellular_organisms|k__Bacteria|-__PVC_group|p__Chlamydiae|c__Chlamydiia|o__Chlamydiales|f__Chlamydiaceae|-__Chlamydia/Chlamydophila_group|g__Chlamydia|s__Chlamydia_trachomatis
NZ_FQLK01000016.1:1-293	gi|815037403|embl|CRH56919.1|	100	84	0	0	40	291	43	126	7e-40	170.6	CRH56919.1	Uncharacterised protein [Chlamydia trachomatis]	133	live	813	2015-04-22	2015-06-13		Chlamydia trachomatis	Bacteria	1	CVNV01000039.1:3099-3500	CVNV01000039.1	Chlamydia trachomatis genome assembly 7501_6#60, scaffold ERS082929SCcontig000039, whole genome shotgun sequence	3776	L1HS_3end	nr	bacteria	|-__root|-__cellular_organisms|k__Bacteria|-__PVC_group|p__Chlamydiae|c__Chlamydiia|o__Chlamydiales|f__Chlamydiaceae|-__Chlamydia/Chlamydophila_group|g__Chlamydia|s__Chlamydia_trachomatis
NZ_MPTK01000058.1:1-2899	gi|1133092507|gb|OMD84210.1|	100	417	0	0	2	1252	1	417	6e-237	830.1	OMD84210.1	endonuclease, partial [Paenibacillus odorifer]	417	live	189426	2017-01-18	2017-01-18		Paenibacillus odorifer	Bacteria	1	MPTK01000058.1:1-1255	MPTK01000058.1	Paenibacillus odorifer strain FSL H3-0287 NODE_58_length_3770_cov_0.0964315_ID_6827, whole genome shotgun sequence	3770	L1P1_orf2	nr	bacteria	|-__root|-__cellular_organisms|k__Bacteria|-__Terrabacteria_group|p__Firmicutes|c__Bacilli|o__Bacillales|f__Paenibacillaceae|g__Paenibacillus|s__Paenibacillus_odorifer
NZ_APME01000129.1:415-1186	gi|1133092508|gb|OMD84211.1|	98	200	4	0	83	682	1	200	9e-117	427.9	OMD84211.1	hypothetical protein BSK67_30015 [Paenibacillus odorifer]	200	live	189426	2017-01-18	2017-01-18		Paenibacillus odorifer	Bacteria	1	MPTK01000058.1:2831-3433	MPTK01000058.1	Paenibacillus odorifer strain FSL H3-0287 NODE_58_length_3770_cov_0.0964315_ID_6827, whole genome shotgun sequence	3770	L1HS_3end	nr	bacteria	|-__root|-__cellular_organisms|k__Bacteria|-__Terrabacteria_group|p__Firmicutes|c__Bacilli|o__Bacillales|f__Paenibacillaceae|g__Paenibacillus|s__Paenibacillus_odorifer
NZ_FQLK01000003.1:1935-2535	gi|1190702267|embl|SGW64338.1|	100	141	0	0	599	177	136	276	7e-72	277.7	SGW64338.1	L1 transposable element [Chlamydia abortus]	280	live	83555	2017-05-10	2017-05-10		Chlamydia abortus	Bacteria	1	FQLG01000008.1:1326-2168	FQLG01000008.1	Chlamydia abortus strain 09_05 genome assembly, contig: ERS067065SCcontig000008, whole genome shotgun sequence	3766	L1PBa_5end	nr	bacteria	|-__root|-__cellular_organisms|k__Bacteria|-__PVC_group|p__Chlamydiae|c__Chlamydiia|o__Chlamydiales|f__Chlamydiaceae|-__Chlamydia/Chlamydophila_group|g__Chlamydia|s__Chlamydia_abortus
NZ_FQLK01000003.1:1935-2535	gi|1190702268|embl|SGW64372.1|	100	141	0	0	599	177	122	262	7e-72	277.7	SGW64372.1	L1 transposable element [Chlamydia abortus]	273	live	83555	2017-05-10	2017-05-10		Chlamydia abortus	Bacteria	1	FQLG01000008.1:2222-3043	FQLG01000008.1	Chlamydia abortus strain 09_05 genome assembly, contig: ERS067065SCcontig000008, whole genome shotgun sequence	3766	L1PBa_5end	nr	bacteria	|-__root|-__cellular_organisms|k__Bacteria|-__PVC_group|p__Chlamydiae|c__Chlamydiia|o__Chlamydiales|f__Chlamydiaceae|-__Chlamydia/Chlamydophila_group|g__Chlamydia|s__Chlamydia_abortus
NZ_FTZV01000286.1:2635-2801	gi|1037146280|embl|SBT50924.1|	100	44	0	0	1	132	41	84	1e-17	96.7	SBT50924.1	hypothetical protein POVWA1_062150 [Plasmodium ovale wallikeri]	84	live	864142	2016-06-16	2016-06-16		Plasmodium ovale wallikeri	Eukaryota	3	FLRD01000172.1:523-777,EP509188.1:274-528,FLRE01001710.1:437-691	FLRD01000172.1	Plasmodium ovale wallikeri genome assembly, contig: contig172, whole genome shotgun sequence	3753	ALR	nr	bacteria	|-__root|-__cellular_organisms|k__Eukaryota|-__Alveolata|p__Apicomplexa|c__Aconoidasida|o__Haemosporida|f__Plasmodiidae|g__Plasmodium|-__Plasmodium_(Plasmodium)|s__Plasmodium_ovale|-__Plasmodium_ovale_wallikeri
NZ_CFSM01000105.1:1117-3692	gi|801480585|embl|CFH47421.1|	99.55	220	1	0	2574	1915	1	220	1e-120	443.4	CFH47421.1	exonuclease III [Mycobacterium tuberculosis]	220	live	1773	2015-03-15	2015-06-13		Mycobacterium tuberculosis	Bacteria	1	CFSM01000105.1:3028-3690	CFSM01000105.1	Mycobacterium tuberculosis genome assembly 6540_8#10, scaffold ERS031555SCcontig000105, whole genome shotgun sequence	3692	L1P1_orf2	nr	bacteria	|-__root|-__cellular_organisms|k__Bacteria|-__Terrabacteria_group|p__Actinobacteria|c__Actinobacteria|o__Corynebacteriales|f__Mycobacteriaceae|g__Mycobacterium|-__Mycobacterium_tuberculosis_complex|s__Mycobacterium_tuberculosis
NZ_FTZV01000465.1:3-172	gi|1037153394|embl|SBT59144.1|	97.62	42	1	0	126	1	5	46	6e-15	87.8	SBT59144.1	PIR Superfamily Protein [Plasmodium ovale wallikeri]	412	live	864142	2016-06-16	2016-06-16		Plasmodium ovale wallikeri	Eukaryota	1	FLRE01002901.1:1678-3644	FLRE01002901.1	Plasmodium ovale wallikeri genome assembly, contig: contig2901, whole genome shotgun sequence	3644	ALR	nr	bacteria	|-__root|-__cellular_organisms|k__Eukaryota|-__Alveolata|p__Apicomplexa|c__Aconoidasida|o__Haemosporida|f__Plasmodiidae|g__Plasmodium|-__Plasmodium_(Plasmodium)|s__Plasmodium_ovale|-__Plasmodium_ovale_wallikeri
NZ_CGZQ01000069.1:1-1661	gi|1117501778|embl|SIH58545.1|	100	109	0	0	1130	1456	1	109	3e-53	218.8	SIH58545.1	L1 transposable element [Mycobacteroides abscessus subsp. abscessus]	109	live	1185650	2016-12-14	2016-12-14		Mycobacteroides abscessus subsp. abscessus	Bacteria	1	FSLH01000015.1:2627-2956	FSLH01000015.1	Mycobacterium abscessus subsp. abscessus strain 1082 genome assembly, contig: ERS383203SCcontig000015, whole genome shotgun sequence	3625	L1HS_5end	nr	bacteria	|-__root|-__cellular_organisms|k__Bacteria|-__Terrabacteria_group|p__Actinobacteria|c__Actinobacteria|o__Corynebacteriales|f__Mycobacteriaceae|g__Mycobacteroides|s__Mycobacteroides_abscessus|-__Mycobacteroides_abscessus_subsp._abscessus
NZ_CGZQ01000069.1:1-1661	gi|1123841984|ref|WP_074379946.1|	98.18	165	3	0	962	1456	1	165	9e-85	323.6	WP_074379946.1	hypothetical protein [Mycobacteroides abscessus]	165	live	36809	2016-12-22	2016-12-22		Mycobacteroides abscessus	Bacteria	1	NZ_FSLH01000015.1:2627-3124	NZ_FSLH01000015.1	Mycobacteroides abscessus subsp. abscessus strain 1082, whole genome shotgun sequence	3625	L1HS_5end	nr	bacteria	|-__root|-__cellular_organisms|k__Bacteria|-__Terrabacteria_group|p__Actinobacteria|c__Actinobacteria|o__Corynebacteriales|f__Mycobacteriaceae|g__Mycobacteroides|s__Mycobacteroides_abscessus
NZ_FSLH01000015.1:1-2563	gi|1123841985|ref|WP_074379947.1|	100	854	0	0	2563	2	1	854	0	1701.4	WP_074379947.1	endonuclease, partial [Mycobacteroides abscessus]	854	live	36809	2016-12-22	2016-12-22		Mycobacteroides abscessus	Bacteria	1	NZ_FSLH01000015.1:1-2563	NZ_FSLH01000015.1	Mycobacteroides abscessus subsp. abscessus strain 1082, whole genome shotgun sequence	3625	L1P1_orf2	nr	bacteria	|-__root|-__cellular_organisms|k__Bacteria|-__Terrabacteria_group|p__Actinobacteria|c__Actinobacteria|o__Corynebacteriales|f__Mycobacteriaceae|g__Mycobacteroides|s__Mycobacteroides_abscessus
NZ_FVQV01000049.1:105-279	gi|884243862|embl|CJZ87703.1|	100	52	0	0	3	158	85	136	3e-23	115.2	CJZ87703.1	Uncharacterised protein [Streptococcus pneumoniae]	136	live	1313	2015-03-22	2015-06-12		Streptococcus pneumoniae	Bacteria	1	CMHF01000056.1:1949-2359	CMHF01000056.1	Streptococcus pneumoniae genome assembly 7038_5#15, scaffold ERS022477SCcontig000056, whole genome shotgun sequence	3625	HSATII	nr	bacteria	|-__root|-__cellular_organisms|k__Bacteria|-__Terrabacteria_group|p__Firmicutes|c__Bacilli|o__Lactobacillales|f__Streptococcaceae|g__Streptococcus|s__Streptococcus_pneumoniae
NZ_PZRW01000026.1:397-567	gi|884243866|embl|CJZ87775.1|	98.04	51	1	0	154	2	1	51	3e-23	115.2	CJZ87775.1	Uncharacterised protein [Streptococcus pneumoniae]	63	live	1313	2015-03-22	2015-06-12		Streptococcus pneumoniae	Bacteria	1	CMHF01000056.1:3095-3286	CMHF01000056.1	Streptococcus pneumoniae genome assembly 7038_5#15, scaffold ERS022477SCcontig000056, whole genome shotgun sequence	3625	HSATII	nr	bacteria	|-__root|-__cellular_organisms|k__Bacteria|-__Terrabacteria_group|p__Firmicutes|c__Bacilli|o__Lactobacillales|f__Streptococcaceae|g__Streptococcus|s__Streptococcus_pneumoniae
NZ_FQLJ01000002.1:1501-2657	gi|1197019175|ref|WP_086430353.1|	100	385	0	0	2	1156	10	394	7e-214	751.5	WP_086430353.1	hypothetical protein [Chlamydia abortus]	406	live	83555	2017-05-24	2017-05-24		Chlamydia abortus	Bacteria	2	NZ_FQLJ01000002.1:1475-2695,FQLJ01000002.1:1475-2695	NZ_FQLJ01000002.1	Chlamydia abortus strain 09_01, whole genome shotgun sequence	3623	L1P1_orf2	nr	bacteria	|-__root|-__cellular_organisms|k__Bacteria|-__PVC_group|p__Chlamydiae|c__Chlamydiia|o__Chlamydiales|f__Chlamydiaceae|-__Chlamydia/Chlamydophila_group|g__Chlamydia|s__Chlamydia_abortus
NZ_FPIK01000009.1:93-776	gi|1196970920|ref|WP_086393223.1|	97.8	227	5	0	683	3	15	241	7e-122	444.5	WP_086393223.1	hypothetical protein [Chlamydia abortus]	256	live	83555	2017-05-24	2017-05-24		Chlamydia abortus	Bacteria	1	NZ_FQSZ01000003.1:1610-2380	NZ_FQSZ01000003.1	Chlamydia abortus strain S3_3, whole genome shotgun sequence	3551	L1PBa_5end	nr	bacteria	|-__root|-__cellular_organisms|k__Bacteria|-__PVC_group|p__Chlamydiae|c__Chlamydiia|o__Chlamydiales|f__Chlamydiaceae|-__Chlamydia/Chlamydophila_group|g__Chlamydia|s__Chlamydia_abortus
NZ_CVNW01000017.1:1196-1687	gi|1196970921|ref|WP_086393224.1|	99.24	132	1	0	1	396	9	140	1e-69	269.6	WP_086393224.1	hypothetical protein [Chlamydia abortus]	145	live	83555	2017-05-24	2017-05-24		Chlamydia abortus	Bacteria	2	NZ_FQSZ01000003.1:2421-2858,FQSZ01000003.1:2421-2858	NZ_FQSZ01000003.1	Chlamydia abortus strain S3_3, whole genome shotgun sequence	3551	L1P1_orf2	nr	bacteria	|-__root|-__cellular_organisms|k__Bacteria|-__PVC_group|p__Chlamydiae|c__Chlamydiia|o__Chlamydiales|f__Chlamydiaceae|-__Chlamydia/Chlamydophila_group|g__Chlamydia|s__Chlamydia_abortus
NZ_FQSZ01000003.1:864-1663	gi|1196970922|ref|WP_086393225.1|	97.92	48	1	0	453	596	1	48	6e-18	99.8	WP_086393225.1	hypothetical protein [Chlamydia abortus]	48	live	83555	2017-05-24	2017-05-24		Chlamydia abortus	Bacteria	1	NZ_FQSZ01000003.1:2849-2995	NZ_FQSZ01000003.1	Chlamydia abortus strain S3_3, whole genome shotgun sequence	3551	L1HS_5end	nr	bacteria	|-__root|-__cellular_organisms|k__Bacteria|-__PVC_group|p__Chlamydiae|c__Chlamydiia|o__Chlamydiales|f__Chlamydiaceae|-__Chlamydia/Chlamydophila_group|g__Chlamydia|s__Chlamydia_abortus
NZ_FQLK01000003.1:1935-2535	gi|1196973518|ref|WP_086395265.1|	100	199	0	0	599	3	122	320	6e-108	397.5	WP_086395265.1	hypothetical protein [Chlamydia abortus]	326	live	83555	2017-05-24	2017-05-24		Chlamydia abortus	Bacteria	2	NZ_FQLK01000003.1:1916-2896,FQLK01000003.1:1916-2896	NZ_FQLK01000003.1	Chlamydia abortus strain 11_01, whole genome shotgun sequence	3531	L1PBa_5end	nr	bacteria	|-__root|-__cellular_organisms|k__Bacteria|-__PVC_group|p__Chlamydiae|c__Chlamydiia|o__Chlamydiales|f__Chlamydiaceae|-__Chlamydia/Chlamydophila_group|g__Chlamydia|s__Chlamydia_abortus
NZ_FTZV01000265.1:2046-2214	gi|1137039026|embl|SJG99250.1|	100	55	0	0	167	3	109	163	1e-24	119.8	SJG99250.1	Uncharacterised protein [Shigella sonnei]	207	live	624	2017-01-28	2017-01-28		Shigella sonnei	Bacteria	1	FTZV01000265.1:1913-2536	FTZV01000265.1	Shigella sonnei strain sh1364 genome assembly, contig: ERS158000SCcontig000265, whole genome shotgun sequence	3520	ALR	nr	bacteria	|-__root|-__cellular_organisms|k__Bacteria|p__Proteobacteria|c__Gammaproteobacteria|o__Enterobacterales|f__Enterobacteriaceae|g__Shigella|s__Shigella_sonnei
NZ_FPMB01000003.1:1-2735	gi|1190686839|embl|SGA27146.1|	100	667	0	0	217	2217	1	667	0	1337.8	SGA27146.1	Retron-type reverse transcriptase [Chlamydia abortus]	682	live	83555	2017-05-10	2017-05-10		Chlamydia abortus	Bacteria	1	FPMB01000003.1:217-2265	FPMB01000003.1	Chlamydia abortus strain C18_98 genome assembly, contig: ERS067043SCcontig000003, whole genome shotgun sequence	3502	L1P1_orf2	nr	bacteria	|-__root|-__cellular_organisms|k__Bacteria|-__PVC_group|p__Chlamydiae|c__Chlamydiia|o__Chlamydiales|f__Chlamydiaceae|-__Chlamydia/Chlamydophila_group|g__Chlamydia|s__Chlamydia_abortus
NZ_FPLU01000003.1:89-926	gi|1190686840|embl|SGA27155.1|	99.12	227	2	0	838	158	128	354	2e-134	486.9	SGA27155.1	Retron-type reverse transcriptase [Chlamydia abortus]	354	live	83555	2017-05-10	2017-05-10		Chlamydia abortus	Bacteria	1	FPMB01000003.1:2205-3269	FPMB01000003.1	Chlamydia abortus strain C18_98 genome assembly, contig: ERS067043SCcontig000003, whole genome shotgun sequence	3502	L1HS_3end	nr	bacteria	|-__root|-__cellular_organisms|k__Bacteria|-__PVC_group|p__Chlamydiae|c__Chlamydiia|o__Chlamydiales|f__Chlamydiaceae|-__Chlamydia/Chlamydophila_group|g__Chlamydia|s__Chlamydia_abortus
NZ_FPLU01000003.1:89-926	gi|1196970908|ref|WP_086393217.1|	99.5	200	1	0	757	158	1	200	2e-118	433.3	WP_086393217.1	DUF1725 domain-containing protein [Chlamydia abortus]	200	live	83555	2017-05-24	2017-07-09		Chlamydia abortus	Bacteria	3	NZ_FPMB01000003.1:2667-3269,NZ_FPMF01000004.1:893-1495,FPMR01000023.1:18-620	NZ_FPMB01000003.1	Chlamydia abortus strain C18_98, whole genome shotgun sequence	3502	L1HS_3end	nr	bacteria	|-__root|-__cellular_organisms|k__Bacteria|-__PVC_group|p__Chlamydiae|c__Chlamydiia|o__Chlamydiales|f__Chlamydiaceae|-__Chlamydia/Chlamydophila_group|g__Chlamydia|s__Chlamydia_abortus
NZ_FPMB01000003.1:1-2735	gi|1197015660|ref|WP_086427328.1|	100	739	0	0	1	2217	1	739	0	1483	WP_086427328.1	endonuclease, partial [Chlamydia abortus]	739	live	83555	2017-05-24	2017-05-24		Chlamydia abortus	Bacteria	1	NZ_FPMB01000003.1:1-2219	NZ_FPMB01000003.1	Chlamydia abortus strain C18_98, whole genome shotgun sequence	3502	L1P1_orf2	nr	bacteria	|-__root|-__cellular_organisms|k__Bacteria|-__PVC_group|p__Chlamydiae|c__Chlamydiia|o__Chlamydiales|f__Chlamydiaceae|-__Chlamydia/Chlamydophila_group|g__Chlamydia|s__Chlamydia_abortus
NZ_LPSC01000028.1:519-683	gi|895705342|embl|CNY16239.1|	97.78	45	1	0	1	135	7	51	7e-19	100.9	CNY16239.1	Uncharacterised protein [Mycobacterium tuberculosis]	51	live	1773	2015-03-23	2015-06-14		Mycobacterium tuberculosis	Bacteria	1	CQTE01000215.1:933-1088	CQTE01000215.1	Mycobacterium tuberculosis genome assembly 5237_5#6, scaffold ERS013490SCcontig000215, whole genome shotgun sequence	3495	HSATII	nr	archaea	|-__root|-__cellular_organisms|k__Bacteria|-__Terrabacteria_group|p__Actinobacteria|c__Actinobacteria|o__Corynebacteriales|f__Mycobacteriaceae|g__Mycobacterium|-__Mycobacterium_tuberculosis_complex|s__Mycobacterium_tuberculosis
NZ_CMKS01000050.1:139-308	gi|895705344|embl|CNY16284.1|	100	38	0	0	115	2	1	38	8e-15	87.4	CNY16284.1	Uncharacterised protein [Mycobacterium tuberculosis]	50	live	1773	2015-03-23	2015-06-14		Mycobacterium tuberculosis	Bacteria	1	CQTE01000215.1:1396-1548	CQTE01000215.1	Mycobacterium tuberculosis genome assembly 5237_5#6, scaffold ERS013490SCcontig000215, whole genome shotgun sequence	3495	HSATII	nr	bacteria	|-__root|-__cellular_organisms|k__Bacteria|-__Terrabacteria_group|p__Actinobacteria|c__Actinobacteria|o__Corynebacteriales|f__Mycobacteriaceae|g__Mycobacterium|-__Mycobacterium_tuberculosis_complex|s__Mycobacterium_tuberculosis
NZ_CQTE01000215.1:1772-1937	gi|895705346|embl|CNY16320.1|	100	55	0	0	2	166	21	75	1e-24	119.8	CNY16320.1	Uncharacterised protein [Mycobacterium tuberculosis]	112	live	1773	2015-03-23	2015-06-14		Mycobacterium tuberculosis	Bacteria	1	CQTE01000215.1:1713-2051	CQTE01000215.1	Mycobacterium tuberculosis genome assembly 5237_5#6, scaffold ERS013490SCcontig000215, whole genome shotgun sequence	3495	HSATII	nr	bacteria	|-__root|-__cellular_organisms|k__Bacteria|-__Terrabacteria_group|p__Actinobacteria|c__Actinobacteria|o__Corynebacteriales|f__Mycobacteriaceae|g__Mycobacterium|-__Mycobacterium_tuberculosis_complex|s__Mycobacterium_tuberculosis
NZ_QLYV01000095.1:4780-4949	gi|918838508|ref|WP_052625444.1|	100	52	0	0	2	157	31	82	5e-22	111.3	WP_052625444.1	hypothetical protein [Mycobacterium tuberculosis]	82	live	1773	2015-08-19	2015-08-19		Mycobacterium tuberculosis	Bacteria	2	NZ_CQTE01000215.1:740-988,CQTE01000215.1:740-988	NZ_CQTE01000215.1	Mycobacterium tuberculosis strain I09800059, whole genome shotgun sequence	3495	HSATII	nr	bacteria	|-__root|-__cellular_organisms|k__Bacteria|-__Terrabacteria_group|p__Actinobacteria|c__Actinobacteria|o__Corynebacteriales|f__Mycobacteriaceae|g__Mycobacterium|-__Mycobacterium_tuberculosis_complex|s__Mycobacterium_tuberculosis
NZ_FSLH01000017.1:885-1055	gi|1037146282|embl|SBT50912.1|	100	57	0	0	171	1	2	58	8e-25	120.6	SBT50912.1	hypothetical protein POVWA1_062120 [Plasmodium ovale wallikeri]	103	live	864142	2016-06-16	2016-06-16		Plasmodium ovale wallikeri	Eukaryota	2	FLRD01000171.1:1421-1732,FLRE01002876.1:207-518	FLRD01000171.1	Plasmodium ovale wallikeri genome assembly, contig: contig171, whole genome shotgun sequence	3481	ALR	nr	bacteria	|-__root|-__cellular_organisms|k__Eukaryota|-__Alveolata|p__Apicomplexa|c__Aconoidasida|o__Haemosporida|f__Plasmodiidae|g__Plasmodium|-__Plasmodium_(Plasmodium)|s__Plasmodium_ovale|-__Plasmodium_ovale_wallikeri
NZ_LZSH01000356.1:854-4147	gi|527576660|gb|EPT69641.1|	99.06	953	9	0	2859	1	1	953	0	1903.6	EPT69641.1	endonuclease, partial [Streptococcus agalactiae CCUG 38383]	1130	live	1154815	2013-07-30	2013-07-30		Streptococcus agalactiae CCUG 38383	Bacteria	1	ALQS01000026.1:73-3467	ALQS01000026.1	Streptococcus agalactiae CCUG 38383 ctg7180000002813, whole genome shotgun sequence	3467	L1P1_orf2	nr	bacteria	|-__root|-__cellular_organisms|k__Bacteria|-__Terrabacteria_group|p__Firmicutes|c__Bacilli|o__Lactobacillales|f__Streptococcaceae|g__Streptococcus|s__Streptococcus_agalactiae|-__Streptococcus_agalactiae_CCUG_38383
NZ_FWYR01000060.1:1930-2144	gi|1154816827|ref|WP_078730321.1|	100	46	0	0	2	139	41	86	1e-10	73.6	WP_078730321.1	MULTISPECIES: hypothetical protein [Bacteria]	86	live	2	2017-03-10	2017-03-22		Bacteria	Bacteria	4	NZ_CIEA01000093.1:3122-3382,NZ_CSAF01000492.1:82-342,NZ_FRWP01001030.1:39-299,EN794441.1:1415-1675	NZ_CIEA01000093.1	Mycobacterium tuberculosis strain Bir 177, whole genome shotgun sequence	3466	HSATII	nr	bacteria	|-__root|-__cellular_organisms|k__Bacteria
NZ_FRWQ01000331.1:203-404	gi|814697488|embl|CKT03275.1|	100	39	0	0	29	145	1	39	1e-14	86.7	CKT03275.1	Uncharacterised protein [Mycobacterium tuberculosis]	39	live	1773	2015-04-21	2015-06-14		Mycobacterium tuberculosis	Bacteria	3	CIEA01000093.1:492-611,CQSC01000215.1:2418-2537,CRZK01000625.1:1294-1413	CIEA01000093.1	Mycobacterium tuberculosis genome assembly 6540_3#9, scaffold ERS027651SCcontig000093, whole genome shotgun sequence	3466	HSATII	nr	bacteria	|-__root|-__cellular_organisms|k__Bacteria|-__Terrabacteria_group|p__Actinobacteria|c__Actinobacteria|o__Corynebacteriales|f__Mycobacteriaceae|g__Mycobacterium|-__Mycobacterium_tuberculosis_complex|s__Mycobacterium_tuberculosis
NZ_CIEA01000093.1:530-757	gi|814697489|embl|CKT03301.1|	100	40	0	0	108	227	1	40	2e-18	99.4	CKT03301.1	Uncharacterised protein [Mycobacterium tuberculosis]	44	live	1773	2015-04-21	2015-06-14		Mycobacterium tuberculosis	Bacteria	1	CIEA01000093.1:637-771	CIEA01000093.1	Mycobacterium tuberculosis genome assembly 6540_3#9, scaffold ERS027651SCcontig000093, whole genome shotgun sequence	3466	HSATII	nr	bacteria	|-__root|-__cellular_organisms|k__Bacteria|-__Terrabacteria_group|p__Actinobacteria|c__Actinobacteria|o__Corynebacteriales|f__Mycobacteriaceae|g__Mycobacterium|-__Mycobacterium_tuberculosis_complex|s__Mycobacterium_tuberculosis
NZ_QLYU01000057.1:996-1223	gi|814697491|embl|CKT03348.1|	100	27	0	0	1	81	41	67	7e-08	64.3	CKT03348.1	Uncharacterised protein [Mycobacterium tuberculosis]	76	live	1773	2015-04-21	2015-06-14		Mycobacterium tuberculosis	Bacteria	3	CIEA01000093.1:1167-1397,CQSC01000215.1:1557-1787,CRZK01000625.1:433-663	CIEA01000093.1	Mycobacterium tuberculosis genome assembly 6540_3#9, scaffold ERS027651SCcontig000093, whole genome shotgun sequence	3466	HSATII	nr	bacteria	|-__root|-__cellular_organisms|k__Bacteria|-__Terrabacteria_group|p__Actinobacteria|c__Actinobacteria|o__Corynebacteriales|f__Mycobacteriaceae|g__Mycobacterium|-__Mycobacterium_tuberculosis_complex|s__Mycobacterium_tuberculosis
NZ_QLYU01000057.1:996-1223	gi|814697492|embl|CKT03381.1|	100	57	0	0	51	221	1	57	6e-26	124.4	CKT03381.1	Uncharacterised protein [Mycobacterium tuberculosis]	57	live	1773	2015-04-21	2015-06-14		Mycobacterium tuberculosis	Bacteria	4	CIEA01000093.1:1337-1510,CQSC01000215.1:1444-1617,CRZK01000625.1:320-493,FWYR01000060.1:114-287	CIEA01000093.1	Mycobacterium tuberculosis genome assembly 6540_3#9, scaffold ERS027651SCcontig000093, whole genome shotgun sequence	3466	HSATII	nr	bacteria	|-__root|-__cellular_organisms|k__Bacteria|-__Terrabacteria_group|p__Actinobacteria|c__Actinobacteria|o__Corynebacteriales|f__Mycobacteriaceae|g__Mycobacterium|-__Mycobacterium_tuberculosis_complex|s__Mycobacterium_tuberculosis
NZ_FRWH01000198.1:176-411	gi|814697494|embl|CKT03446.1|	100	67	0	0	222	22	1	67	8e-22	110.5	CKT03446.1	Uncharacterised protein [Mycobacterium tuberculosis]	67	live	1773	2015-04-21	2015-06-14		Mycobacterium tuberculosis	Bacteria	1	CIEA01000093.1:1672-1875	CIEA01000093.1	Mycobacterium tuberculosis genome assembly 6540_3#9, scaffold ERS027651SCcontig000093, whole genome shotgun sequence	3466	HSATII	nr	bacteria	|-__root|-__cellular_organisms|k__Bacteria|-__Terrabacteria_group|p__Actinobacteria|c__Actinobacteria|o__Corynebacteriales|f__Mycobacteriaceae|g__Mycobacterium|-__Mycobacterium_tuberculosis_complex|s__Mycobacterium_tuberculosis
NZ_MOHL01000098.1:1490-1673	gi|814697495|embl|CKT03482.1|	100	45	0	0	183	49	3	47	8e-22	110.5	CKT03482.1	Uncharacterised protein [Mycobacterium tuberculosis]	47	live	1773	2015-04-21	2015-06-14		Mycobacterium tuberculosis	Bacteria	2	CIEA01000093.1:1918-2061,CQSC01000215.1:893-1036	CIEA01000093.1	Mycobacterium tuberculosis genome assembly 6540_3#9, scaffold ERS027651SCcontig000093, whole genome shotgun sequence	3466	HSATII	nr	bacteria	|-__root|-__cellular_organisms|k__Bacteria|-__Terrabacteria_group|p__Actinobacteria|c__Actinobacteria|o__Corynebacteriales|f__Mycobacteriaceae|g__Mycobacterium|-__Mycobacterium_tuberculosis_complex|s__Mycobacterium_tuberculosis
NZ_QKVX01000015.1:741-904	gi|814697498|embl|CKT03581.1|	100	54	0	0	2	163	22	75	7e-29	134	CKT03581.1	Uncharacterised protein [Mycobacterium tuberculosis]	99	live	1773	2015-04-21	2015-06-14		Mycobacterium tuberculosis	Bacteria	1	CIEA01000093.1:2932-3231	CIEA01000093.1	Mycobacterium tuberculosis genome assembly 6540_3#9, scaffold ERS027651SCcontig000093, whole genome shotgun sequence	3466	HSATII	nr	bacteria	|-__root|-__cellular_organisms|k__Bacteria|-__Terrabacteria_group|p__Actinobacteria|c__Actinobacteria|o__Corynebacteriales|f__Mycobacteriaceae|g__Mycobacterium|-__Mycobacterium_tuberculosis_complex|s__Mycobacterium_tuberculosis
NZ_FPIJ01000009.1:9249-10593	gi|809289410|embl|CRH44458.1|	99.23	261	2	0	455	1237	1	261	4e-137	496.9	CRH44458.1	Uncharacterised protein [Chlamydia trachomatis]	291	live	813	2015-04-21	2015-06-12		Chlamydia trachomatis	Bacteria	1	CVNL01000007.1:1520-2395	CVNL01000007.1	Chlamydia trachomatis genome assembly 7396_3#14, scaffold ERS075189SCcontig000007, whole genome shotgun sequence	3429	L1P1_orf2	nr	bacteria	|-__root|-__cellular_organisms|k__Bacteria|-__PVC_group|p__Chlamydiae|c__Chlamydiia|o__Chlamydiales|f__Chlamydiaceae|-__Chlamydia/Chlamydophila_group|g__Chlamydia|s__Chlamydia_trachomatis
NZ_FPIJ01000009.1:9249-10593	gi|950174369|ref|WP_057222138.1|	98.89	271	3	0	425	1237	1	271	4e-143	516.9	WP_057222138.1	hypothetical protein [Chlamydia trachomatis]	301	live	813	2015-11-09	2015-11-09		Chlamydia trachomatis	Bacteria	1	NZ_CVNL01000007.1:1520-2425	NZ_CVNL01000007.1	Chlamydia trachomatis strain R27091IMS, whole genome shotgun sequence	3429	L1P1_orf2	nr	bacteria	|-__root|-__cellular_organisms|k__Bacteria|-__PVC_group|p__Chlamydiae|c__Chlamydiia|o__Chlamydiales|f__Chlamydiaceae|-__Chlamydia/Chlamydophila_group|g__Chlamydia|s__Chlamydia_trachomatis
NZ_CVNL01000007.1:2440-3367	gi|950174370|ref|WP_057222139.1|	100	308	0	0	927	4	10	317	3e-176	625.9	WP_057222139.1	hypothetical protein [Chlamydia trachomatis]	321	live	813	2015-11-09	2015-11-09		Chlamydia trachomatis	Bacteria	2	NZ_CVNL01000007.1:2428-3393,CVNL01000007.1:2428-3393	NZ_CVNL01000007.1	Chlamydia trachomatis strain R27091IMS, whole genome shotgun sequence	3429	L1P1_orf2	nr	bacteria	|-__root|-__cellular_organisms|k__Bacteria|-__PVC_group|p__Chlamydiae|c__Chlamydiia|o__Chlamydiales|f__Chlamydiaceae|-__Chlamydia/Chlamydophila_group|g__Chlamydia|s__Chlamydia_trachomatis
NZ_PYPV01000342.1:1-145	gi|1037157446|embl|SBT55279.1|	97.37	38	1	0	117	4	92	129	4e-12	78.2	SBT55279.1	hypothetical protein POVWA2_067180 [Plasmodium ovale wallikeri]	129	live	864142	2016-06-16	2016-06-16		Plasmodium ovale wallikeri	Eukaryota	1	FLRE01000771.1:3009-3398	FLRE01000771.1	Plasmodium ovale wallikeri genome assembly, contig: contig771, whole genome shotgun sequence	3398	HSATII	nr	bacteria	|-__root|-__cellular_organisms|k__Eukaryota|-__Alveolata|p__Apicomplexa|c__Aconoidasida|o__Haemosporida|f__Plasmodiidae|g__Plasmodium|-__Plasmodium_(Plasmodium)|s__Plasmodium_ovale|-__Plasmodium_ovale_wallikeri
NZ_MTHY01000274.1:1-813	gi|1409680369|gb|RAR28358.1|	97.3	37	1	0	253	143	1	37	6e-11	76.6	RAR28358.1	hypothetical protein DP092_25740 [Pseudomonas sp. MDMC224]	37	live	2218663	2018-06-27	2018-06-27		Pseudomonas sp. MDMC224	Bacteria	2	QLYU01000042.1:211-324,NZ_QLYU01000042.1:211-324	QLYU01000042.1	Pseudomonas sp. MDMC224 NODE_42_length_3393_cov_2.53215, whole genome shotgun sequence	3393	L1HS_5end	nr	bacteria	|-__root|-__cellular_organisms|k__Bacteria|p__Proteobacteria|c__Gammaproteobacteria|o__Pseudomonadales|f__Pseudomonadaceae|g__Pseudomonas|s__Pseudomonas_sp._MDMC224
NZ_AKPL01000008.1:1-2797	gi|487823885|ref|WP_001897351.1|	99.89	931	1	0	5	2797	1	931	0	1876.7	WP_001897351.1	DUF1725 domain-containing protein [Helicobacter pylori]	1108	live	210	2013-05-04	2017-12-14		Helicobacter pylori	Bacteria	2	NZ_AKPL01000008.1:5-3331,AKPL01000008.1:5-3331	NZ_AKPL01000008.1	Helicobacter pylori Hp P-4 HpP_4.contig.7, whole genome shotgun sequence	3390	L1P1_orf2	nr	bacteria	|-__root|-__cellular_organisms|k__Bacteria|p__Proteobacteria|-__delta/epsilon_subdivisions|c__Epsilonproteobacteria|o__Campylobacterales|f__Helicobacteraceae|g__Helicobacter|s__Helicobacter_pylori
NZ_CVNL01000006.1:1347-2045	gi|1168804864|ref|WP_080374804.1|	100	226	0	0	1	678	143	368	1e-132	480.3	WP_080374804.1	DUF1725 domain-containing protein [Chlamydia trachomatis]	368	live	813	2017-03-26	2017-07-09		Chlamydia trachomatis	Bacteria	2	NZ_CVNL01000006.1:921-2027,CVNL01000006.1:921-2027	NZ_CVNL01000006.1	Chlamydia trachomatis strain R27091IMS, whole genome shotgun sequence	3317	L1HS_3end	nr	bacteria	|-__root|-__cellular_organisms|k__Bacteria|-__PVC_group|p__Chlamydiae|c__Chlamydiia|o__Chlamydiales|f__Chlamydiaceae|-__Chlamydia/Chlamydophila_group|g__Chlamydia|s__Chlamydia_trachomatis
NZ_CVNL01000006.1:2385-2822	gi|1168804865|ref|WP_080374805.1|	100	139	0	0	1	417	8	146	6e-79	300.8	WP_080374805.1	DUF1725 domain-containing protein [Chlamydia trachomatis]	146	live	813	2017-03-26	2017-07-11		Chlamydia trachomatis	Bacteria	1	NZ_CVNL01000006.1:2364-2804	NZ_CVNL01000006.1	Chlamydia trachomatis strain R27091IMS, whole genome shotgun sequence	3317	L1HS_3end	nr	bacteria	|-__root|-__cellular_organisms|k__Bacteria|-__PVC_group|p__Chlamydiae|c__Chlamydiia|o__Chlamydiales|f__Chlamydiaceae|-__Chlamydia/Chlamydophila_group|g__Chlamydia|s__Chlamydia_trachomatis
NZ_FPIJ01000012.1:5605-6427	gi|809289413|embl|CRH44453.1|	99.44	177	1	0	60	590	1	177	5e-103	382.5	CRH44453.1	Retron-type reverse transcriptase [Chlamydia trachomatis]	177	live	813	2015-04-21	2015-06-12		Chlamydia trachomatis	Bacteria	1	CVNL01000006.1:4-537	CVNL01000006.1	Chlamydia trachomatis genome assembly 7396_3#14, scaffold ERS075189SCcontig000006, whole genome shotgun sequence	3317	L1P1_orf2	nr	bacteria	|-__root|-__cellular_organisms|k__Bacteria|-__PVC_group|p__Chlamydiae|c__Chlamydiia|o__Chlamydiales|f__Chlamydiaceae|-__Chlamydia/Chlamydophila_group|g__Chlamydia|s__Chlamydia_trachomatis
NZ_CVNL01000006.1:2385-2822	gi|809289415|embl|CRH44455.1|	100	139	0	0	1	417	26	164	6e-79	300.8	CRH44455.1	Retron-type reverse transcriptase [Chlamydia trachomatis]	164	live	813	2015-04-21	2015-06-12		Chlamydia trachomatis	Bacteria	1	CVNL01000006.1:2310-2804	CVNL01000006.1	Chlamydia trachomatis genome assembly 7396_3#14, scaffold ERS075189SCcontig000006, whole genome shotgun sequence	3317	L1HS_3end	nr	bacteria	|-__root|-__cellular_organisms|k__Bacteria|-__PVC_group|p__Chlamydiae|c__Chlamydiia|o__Chlamydiales|f__Chlamydiaceae|-__Chlamydia/Chlamydophila_group|g__Chlamydia|s__Chlamydia_trachomatis
NZ_FPIJ01000046.1:21-372	gi|809289416|embl|CRH44456.1|	100	28	0	0	2	85	64	91	8e-08	64.3	CRH44456.1	Uncharacterised protein [Chlamydia trachomatis]	91	live	813	2015-04-21	2015-06-12		Chlamydia trachomatis	Bacteria	1	CVNL01000006.1:2734-3009	CVNL01000006.1	Chlamydia trachomatis genome assembly 7396_3#14, scaffold ERS075189SCcontig000006, whole genome shotgun sequence	3317	L1HS_3end	nr	bacteria	|-__root|-__cellular_organisms|k__Bacteria|-__PVC_group|p__Chlamydiae|c__Chlamydiia|o__Chlamydiales|f__Chlamydiaceae|-__Chlamydia/Chlamydophila_group|g__Chlamydia|s__Chlamydia_trachomatis
NZ_QDDV01000116.1:119-289	gi|1391865139|ref|WP_109548628.1|	100	38	0	0	171	58	34	71	3e-16	92	WP_109548628.1	hypothetical protein [Mycobacteroides abscessus]	71	live	36809	2018-05-24	2018-05-24		Mycobacteroides abscessus	Bacteria	1	NZ_FSLH01000017.1:273-488	NZ_FSLH01000017.1	Mycobacteroides abscessus subsp. abscessus strain 1082, whole genome shotgun sequence	3282	ALR	nr	bacteria	|-__root|-__cellular_organisms|k__Bacteria|-__Terrabacteria_group|p__Actinobacteria|c__Actinobacteria|o__Corynebacteriales|f__Mycobacteriaceae|g__Mycobacteroides|s__Mycobacteroides_abscessus
NZ_PYPZ01000117.1:1533-1702	gi|1391865140|ref|WP_109548629.1|	100	37	0	0	3	113	35	71	2e-15	89.4	WP_109548629.1	hypothetical protein [Mycobacteroides abscessus]	71	live	36809	2018-05-24	2018-05-24		Mycobacteroides abscessus	Bacteria	1	NZ_FSLH01000017.1:1464-1679	NZ_FSLH01000017.1	Mycobacteroides abscessus subsp. abscessus strain 1082, whole genome shotgun sequence	3282	ALR	nr	bacteria	|-__root|-__cellular_organisms|k__Bacteria|-__Terrabacteria_group|p__Actinobacteria|c__Actinobacteria|o__Corynebacteriales|f__Mycobacteriaceae|g__Mycobacteroides|s__Mycobacteroides_abscessus
NZ_FUFS01000212.1:1-2671	gi|1148640965|ref|WP_077385493.1|	100	212	0	0	458	1093	1	212	2e-115	426	WP_077385493.1	hypothetical protein [Mycobacterium tuberculosis]	212	live	1773	2017-02-20	2017-02-20		Mycobacterium tuberculosis	Bacteria	1	NZ_FUFS01000212.1:458-1096	NZ_FUFS01000212.1	Mycobacterium tuberculosis isolate MTB20_M, whole genome shotgun sequence	3264	L1P1_orf2	nr	bacteria	|-__root|-__cellular_organisms|k__Bacteria|-__Terrabacteria_group|p__Actinobacteria|c__Actinobacteria|o__Corynebacteriales|f__Mycobacteriaceae|g__Mycobacterium|-__Mycobacterium_tuberculosis_complex|s__Mycobacterium_tuberculosis
NZ_CMHF01000056.1:3458-3625	gi|882811141|embl|CJH42115.1|	97.73	44	1	0	35	166	1	44	6e-17	94.4	CJH42115.1	Uncharacterised protein [Streptococcus pneumoniae]	44	live	1313	2015-03-21	2015-06-14		Streptococcus pneumoniae	Bacteria	1	CLCE01000362.1:18-152	CLCE01000362.1	Streptococcus pneumoniae genome assembly 6871_2#19, scaffold ERS021353SCcontig000362, whole genome shotgun sequence	3252	HSATII	nr	bacteria	|-__root|-__cellular_organisms|k__Bacteria|-__Terrabacteria_group|p__Firmicutes|c__Bacilli|o__Lactobacillales|f__Streptococcaceae|g__Streptococcus|s__Streptococcus_pneumoniae
NZ_CVND01000050.1:1961-2407	gi|942535312|ref|WP_055348875.1|	98.68	76	1	0	402	175	1	76	1e-34	153.7	WP_055348875.1	hypothetical protein [Chlamydia trachomatis]	76	live	813	2015-10-27	2015-10-27		Chlamydia trachomatis	Bacteria	1	NZ_CVND01000050.1:2132-2362	NZ_CVND01000050.1	Chlamydia trachomatis strain LGV1339, whole genome shotgun sequence	3207	L1HS_3end	nr	bacteria	|-__root|-__cellular_organisms|k__Bacteria|-__PVC_group|p__Chlamydiae|c__Chlamydiia|o__Chlamydiales|f__Chlamydiaceae|-__Chlamydia/Chlamydophila_group|g__Chlamydia|s__Chlamydia_trachomatis
NZ_KV810671.1:76-245	gi|1037155369|embl|SBT57516.1|	97.67	43	1	0	169	41	277	319	5e-17	94.7	SBT57516.1	PIR Superfamily Protein [Plasmodium ovale wallikeri]	319	live	864142	2016-06-16	2016-06-16		Plasmodium ovale wallikeri	Eukaryota	1	FLRE01001868.1:1576-3190	FLRE01001868.1	Plasmodium ovale wallikeri genome assembly, contig: contig1868, whole genome shotgun sequence	3190	HSATII	nr	bacteria	|-__root|-__cellular_organisms|k__Eukaryota|-__Alveolata|p__Apicomplexa|c__Aconoidasida|o__Haemosporida|f__Plasmodiidae|g__Plasmodium|-__Plasmodium_(Plasmodium)|s__Plasmodium_ovale|-__Plasmodium_ovale_wallikeri
NZ_PVDJ01000062.1:2907-3076	gi|1358730709|ref|WP_105546408.1|	100	56	0	0	170	3	22	77	1e-23	116.7	WP_105546408.1	hypothetical protein [Cronobacter sakazakii]	84	live	28141	2018-03-13	2018-03-13		Cronobacter sakazakii	Bacteria	2	NZ_PVDJ01000062.1:2885-3139,PVDJ01000062.1:2885-3139	NZ_PVDJ01000062.1	Cronobacter sakazakii strain MOD1_LR646 LR646A_contig_65, whole genome shotgun sequence	3147	ALR	nr	bacteria	|-__root|-__cellular_organisms|k__Bacteria|p__Proteobacteria|c__Gammaproteobacteria|o__Enterobacterales|f__Enterobacteriaceae|g__Cronobacter|s__Cronobacter_sakazakii
NZ_FPIJ01000009.1:5782-6591	gi|815045556|embl|CRH55776.1|	97.81	183	4	0	48	596	1	183	6e-98	365.5	CRH55776.1	L1 transposable element [Chlamydia trachomatis]	183	live	813	2015-04-22	2015-06-13		Chlamydia trachomatis	Bacteria	1	CVNU01000040.1:103-654	CVNU01000040.1	Chlamydia trachomatis genome assembly 7501_6#59, scaffold ERS082928SCcontig000040, whole genome shotgun sequence	3147	L1HS_5end	nr	bacteria	|-__root|-__cellular_organisms|k__Bacteria|-__PVC_group|p__Chlamydiae|c__Chlamydiia|o__Chlamydiales|f__Chlamydiaceae|-__Chlamydia/Chlamydophila_group|g__Chlamydia|s__Chlamydia_trachomatis
NZ_FPIH01000010.1:6347-7681	gi|815045558|embl|CRH55778.1|	99.52	210	1	0	2	631	9	218	6e-118	433.3	CRH55778.1	exonuclease III [Chlamydia trachomatis]	233	live	813	2015-04-22	2015-06-13		Chlamydia trachomatis	Bacteria	1	CVNU01000040.1:1779-2480	CVNU01000040.1	Chlamydia trachomatis genome assembly 7501_6#59, scaffold ERS082928SCcontig000040, whole genome shotgun sequence	3147	L1P1_orf2	nr	bacteria	|-__root|-__cellular_organisms|k__Bacteria|-__PVC_group|p__Chlamydiae|c__Chlamydiia|o__Chlamydiales|f__Chlamydiaceae|-__Chlamydia/Chlamydophila_group|g__Chlamydia|s__Chlamydia_trachomatis
NZ_FRWQ01000176.1:1-739	gi|1327609925|ref|WP_102023050.1|	97.5	200	5	0	658	59	1	200	5e-116	425.2	WP_102023050.1	DUF1725 domain-containing protein [Klebsiella pneumoniae]	200	live	573	2018-01-11	2018-02-02		Klebsiella pneumoniae	Bacteria	1	NZ_NWDS01000083.1:358-960	NZ_NWDS01000083.1	Klebsiella pneumoniae subsp. pneumoniae strain WCHKP020126 NODE_83_length_3144_cov_6.27184, whole genome shotgun sequence	3144	L1HS_3end	nr	bacteria	|-__root|-__cellular_organisms|k__Bacteria|p__Proteobacteria|c__Gammaproteobacteria|o__Enterobacterales|f__Enterobacteriaceae|g__Klebsiella|s__Klebsiella_pneumoniae
NZ_JUHX01000041.1:1-1724	gi|1327609928|ref|WP_102023051.1|	97.67	515	12	0	81	1625	1	515	8e-297	1028.1	WP_102023051.1	hypothetical protein [Klebsiella pneumoniae]	524	live	573	2018-01-11	2018-01-11		Klebsiella pneumoniae	Bacteria	1	NZ_NWDS01000083.1:957-2531	NZ_NWDS01000083.1	Klebsiella pneumoniae subsp. pneumoniae strain WCHKP020126 NODE_83_length_3144_cov_6.27184, whole genome shotgun sequence	3144	L1P1_orf2	nr	bacteria	|-__root|-__cellular_organisms|k__Bacteria|p__Proteobacteria|c__Gammaproteobacteria|o__Enterobacterales|f__Enterobacteriaceae|g__Klebsiella|s__Klebsiella_pneumoniae
NZ_NGBN01000091.1:232-400	gi|1117501763|embl|SIH59232.1|	100	55	0	0	167	3	109	163	2e-24	119	SIH59232.1	Uncharacterised protein [Mycobacteroides abscessus subsp. abscessus]	207	live	1185650	2016-12-14	2016-12-14		Mycobacteroides abscessus subsp. abscessus	Bacteria	1	FSLH01000018.1:2119-2742	FSLH01000018.1	Mycobacterium abscessus subsp. abscessus strain 1082 genome assembly, contig: ERS383203SCcontig000018, whole genome shotgun sequence	3125	ALR	nr	bacteria	|-__root|-__cellular_organisms|k__Bacteria|-__Terrabacteria_group|p__Actinobacteria|c__Actinobacteria|o__Corynebacteriales|f__Mycobacteriaceae|g__Mycobacteroides|s__Mycobacteroides_abscessus|-__Mycobacteroides_abscessus_subsp._abscessus
NZ_FQLK01000016.1:1-293	gi|1190717776|embl|SFW05966.1|	100	79	0	0	55	291	74	152	2e-36	159.5	SFW05966.1	Uncharacterised protein [Chlamydia abortus]	159	live	83555	2017-05-10	2017-05-10		Chlamydia abortus	Bacteria	1	FPIH01000023.1:367-846	FPIH01000023.1	Chlamydophila abortus strain 86/30 genome assembly, contig: ERS008766SCcontig000023, whole genome shotgun sequence	3125	L1HS_3end	nr	bacteria	|-__root|-__cellular_organisms|k__Bacteria|-__PVC_group|p__Chlamydiae|c__Chlamydiia|o__Chlamydiales|f__Chlamydiaceae|-__Chlamydia/Chlamydophila_group|g__Chlamydia|s__Chlamydia_abortus
NZ_NGBN01000091.1:232-400	gi|809852523|embl|CJS63071.1|	100	55	0	0	167	3	109	163	2e-24	119	CJS63071.1	Uncharacterised protein [Streptococcus pneumoniae]	207	live	1313	2015-04-21	2015-06-14		Streptococcus pneumoniae	Bacteria	3	CGZQ01000058.1:125-748,CKYY01000041.1:348-971,CMKS01000059.2:2547-3170	CGZQ01000058.1	Streptococcus pneumoniae genome assembly 6983_4#74, scaffold ERS021791SCcontig000058, whole genome shotgun sequence	3115	ALR	nr	bacteria	|-__root|-__cellular_organisms|k__Bacteria|-__Terrabacteria_group|p__Firmicutes|c__Bacilli|o__Lactobacillales|f__Streptococcaceae|g__Streptococcus|s__Streptococcus_pneumoniae
NZ_PVDJ01000062.1:529-699	gi|912673043|ref|WP_050226859.1|	100	57	0	0	171	1	28	84	3e-24	118.6	WP_050226859.1	hypothetical protein [Streptococcus pneumoniae]	98	live	1313	2015-08-05	2015-08-05		Streptococcus pneumoniae	Bacteria	5	NZ_CGZQ01000058.1:1216-1512,NZ_CKYY01000041.1:1439-1735,NZ_CMHC01000047.1:303-599,NZ_CMKS01000059.1:3638-3934,FSLH01000018.1:153-449	NZ_CGZQ01000058.1	Streptococcus pneumoniae strain SMRU2282, whole genome shotgun sequence	3115	ALR	nr	bacteria	|-__root|-__cellular_organisms|k__Bacteria|-__Terrabacteria_group|p__Firmicutes|c__Bacilli|o__Lactobacillales|f__Streptococcaceae|g__Streptococcus|s__Streptococcus_pneumoniae
NZ_MTHY01000206.1:1-2272	gi|1187926480|gb|OSS12043.1|	100	670	0	0	263	2272	1	670	0	1359	OSS12043.1	hypothetical protein BV335_05487 [Pseudomonas syringae pv. actinidiae]	847	live	103796	2017-04-28	2017-04-28		Pseudomonas syringae pv. actinidiae	Bacteria	1	MTHY01000206.1:263-2806	MTHY01000206.1	Pseudomonas syringae pv. actinidiae strain C31 BV335_206, whole genome shotgun sequence	3087	L1P1_orf2	nr	bacteria	|-__root|-__cellular_organisms|k__Bacteria|p__Proteobacteria|c__Gammaproteobacteria|o__Pseudomonadales|f__Pseudomonadaceae|g__Pseudomonas|-__Pseudomonas_syringae_group|-__Pseudomonas_syringae_group_genomosp._1|s__Pseudomonas_syringae|-__Pseudomonas_syringae_group_pathovars_incertae_sedis|-__Pseudomonas_syringae_pv._actinidiae
NZ_MTHY01000206.1:1-2272	gi|1203199318|ref|WP_087673707.1|	100	757	0	0	2	2272	1	757	0	1527.7	WP_087673707.1	DUF1725 domain-containing protein, partial [Pseudomonas syringae]	934	live	317	2017-06-09	2017-12-12		Pseudomonas syringae	Bacteria	1	NZ_MTHY01000206.1:1-2806	NZ_MTHY01000206.1	Pseudomonas syringae pv. actinidiae strain C31 BV335_206, whole genome shotgun sequence	3087	L1P1_orf2	nr	bacteria	|-__root|-__cellular_organisms|k__Bacteria|p__Proteobacteria|c__Gammaproteobacteria|o__Pseudomonadales|f__Pseudomonadaceae|g__Pseudomonas|-__Pseudomonas_syringae_group|-__Pseudomonas_syringae_group_genomosp._1|s__Pseudomonas_syringae
NZ_QGNL01000025.1:1-628	gi|1037155818|embl|SBT57023.1|	100	33	0	0	103	201	51	83	1e-10	74.3	SBT57023.1	hypothetical protein POVWA2_076870 [Plasmodium ovale wallikeri]	83	live	864142	2016-06-16	2016-06-16		Plasmodium ovale wallikeri	Eukaryota	1	FLRE01001690.1:1-378	FLRE01001690.1	Plasmodium ovale wallikeri genome assembly, contig: contig1690, whole genome shotgun sequence	3080	L1P1_orf2	nr	bacteria	|-__root|-__cellular_organisms|k__Eukaryota|-__Alveolata|p__Apicomplexa|c__Aconoidasida|o__Haemosporida|f__Plasmodiidae|g__Plasmodium|-__Plasmodium_(Plasmodium)|s__Plasmodium_ovale|-__Plasmodium_ovale_wallikeri
NZ_FTZV01000294.1:90-849	gi|1137038906|embl|SJH04400.1|	100	253	0	0	760	2	1	253	3e-142	512.7	SJH04400.1	exonuclease III [Shigella sonnei]	256	live	624	2017-01-28	2017-01-28		Shigella sonnei	Bacteria	1	FTZV01000294.1:79-849	FTZV01000294.1	Shigella sonnei strain sh1364 genome assembly, contig: ERS158000SCcontig000294, whole genome shotgun sequence	3058	L1P1_orf2	nr	bacteria	|-__root|-__cellular_organisms|k__Bacteria|p__Proteobacteria|c__Gammaproteobacteria|o__Enterobacterales|f__Enterobacteriaceae|g__Shigella|s__Shigella_sonnei
NZ_QDDX01000074.1:1376-3906	gi|1137038907|embl|SJH04431.1|	97.14	140	4	0	1	420	1	140	5e-72	282	SJH04431.1	exonuclease III [Shigella sonnei]	147	live	624	2017-01-28	2017-01-28		Shigella sonnei	Bacteria	1	FTZV01000294.1:1020-1463	FTZV01000294.1	Shigella sonnei strain sh1364 genome assembly, contig: ERS158000SCcontig000294, whole genome shotgun sequence	3058	L1P1_orf2	nr	bacteria	|-__root|-__cellular_organisms|k__Bacteria|p__Proteobacteria|c__Gammaproteobacteria|o__Enterobacterales|f__Enterobacteriaceae|g__Shigella|s__Shigella_sonnei
NZ_FTZV01000294.1:1314-3058	gi|1137038908|embl|SJH04451.1|	100	304	0	0	1128	217	1	304	2e-159	572	SJH04451.1	L1 transposable element [Shigella sonnei]	304	live	624	2017-01-28	2017-01-28		Shigella sonnei	Bacteria	1	FTZV01000294.1:1527-2441	FTZV01000294.1	Shigella sonnei strain sh1364 genome assembly, contig: ERS158000SCcontig000294, whole genome shotgun sequence	3058	L1HS_5end	nr	bacteria	|-__root|-__cellular_organisms|k__Bacteria|p__Proteobacteria|c__Gammaproteobacteria|o__Enterobacterales|f__Enterobacteriaceae|g__Shigella|s__Shigella_sonnei
NZ_FTZV01000294.1:1314-3058	gi|1143202209|ref|WP_077128851.1|	100	338	0	0	1230	217	1	338	3e-180	641	WP_077128851.1	hypothetical protein [Shigella sonnei]	338	live	624	2017-02-08	2018-01-11		Shigella sonnei	Bacteria	1	NZ_FTZV01000294.1:1527-2543	NZ_FTZV01000294.1	Shigella sonnei strain sh1364, whole genome shotgun sequence	3058	L1HS_5end	nr	bacteria	|-__root|-__cellular_organisms|k__Bacteria|p__Proteobacteria|c__Gammaproteobacteria|o__Enterobacterales|f__Enterobacteriaceae|g__Shigella|s__Shigella_sonnei
NZ_NCTS01000071.1:1-691	gi|1149974854|ref|WP_077901533.1|	100	37	0	0	365	475	1	37	3e-11	77	WP_077901533.1	hypothetical protein [Shigella sonnei]	37	live	624	2017-02-26	2017-02-26		Shigella sonnei	Bacteria	1	NZ_FTZV01000294.1:913-1026	NZ_FTZV01000294.1	Shigella sonnei strain sh1364, whole genome shotgun sequence	3058	L1HS_5end	nr	bacteria	|-__root|-__cellular_organisms|k__Bacteria|p__Proteobacteria|c__Gammaproteobacteria|o__Enterobacterales|f__Enterobacteriaceae|g__Shigella|s__Shigella_sonnei
NZ_FQLM01000003.1:4122-5041	gi|1190714804|embl|SFW04095.1|	98.46	65	1	0	305	499	1	65	2e-26	128.3	SFW04095.1	Uncharacterised protein [Chlamydia abortus]	65	live	83555	2017-05-10	2017-05-10		Chlamydia abortus	Bacteria	1	FPIL01000010.1:127-324	FPIL01000010.1	Chlamydophila abortus strain POS genome assembly, contig: ERS003306SCcontig000010, whole genome shotgun sequence	3057	L1PBa_5end	nr	bacteria	|-__root|-__cellular_organisms|k__Bacteria|-__PVC_group|p__Chlamydiae|c__Chlamydiia|o__Chlamydiales|f__Chlamydiaceae|-__Chlamydia/Chlamydophila_group|g__Chlamydia|s__Chlamydia_abortus
NZ_FPIJ01000009.1:4837-5646	gi|1197015208|ref|WP_086427303.1|	97.84	139	3	0	180	596	1	139	6e-72	279.3	WP_086427303.1	hypothetical protein [Chlamydia abortus]	139	live	83555	2017-05-24	2017-05-24		Chlamydia abortus	Bacteria	1	NZ_FPIL01000010.1:2-421	NZ_FPIL01000010.1	Chlamydia abortus strain POS, whole genome shotgun sequence	3057	L1HS_5end	nr	bacteria	|-__root|-__cellular_organisms|k__Bacteria|-__PVC_group|p__Chlamydiae|c__Chlamydiia|o__Chlamydiales|f__Chlamydiaceae|-__Chlamydia/Chlamydophila_group|g__Chlamydia|s__Chlamydia_abortus
NZ_FPIL01000010.1:491-1128	gi|1197015209|ref|WP_086427304.1|	100	141	0	0	2	424	11	151	9e-75	287.7	WP_086427304.1	hypothetical protein [Chlamydia abortus]	151	live	83555	2017-05-24	2017-05-24		Chlamydia abortus	Bacteria	2	NZ_FPIL01000010.1:462-917,FPIL01000010.1:462-917	NZ_FPIL01000010.1	Chlamydia abortus strain POS, whole genome shotgun sequence	3057	L1HS_5end	nr	bacteria	|-__root|-__cellular_organisms|k__Bacteria|-__PVC_group|p__Chlamydiae|c__Chlamydiia|o__Chlamydiales|f__Chlamydiaceae|-__Chlamydia/Chlamydophila_group|g__Chlamydia|s__Chlamydia_abortus
NZ_FQLM01000003.1:4122-5041	gi|1197015210|ref|WP_086427305.1|	96.61	236	8	0	918	211	173	408	3e-125	456.4	WP_086427305.1	hypothetical protein [Chlamydia abortus]	408	live	83555	2017-05-24	2017-05-24		Chlamydia abortus	Bacteria	2	NZ_FPIL01000010.1:958-2184,FPIL01000010.1:958-2184	NZ_FPIL01000010.1	Chlamydia abortus strain POS, whole genome shotgun sequence	3057	L1PBa_5end	nr	bacteria	|-__root|-__cellular_organisms|k__Bacteria|-__PVC_group|p__Chlamydiae|c__Chlamydiia|o__Chlamydiales|f__Chlamydiaceae|-__Chlamydia/Chlamydophila_group|g__Chlamydia|s__Chlamydia_abortus
NZ_FTZV01000281.1:325-493	gi|912673042|ref|WP_050226858.1|	100	55	0	0	2	166	29	83	9e-24	117.1	WP_050226858.1	hypothetical protein [Streptococcus pneumoniae]	83	live	1313	2015-08-05	2015-08-05		Streptococcus pneumoniae	Bacteria	3	NZ_CKYY01000040.1:2435-2686,NZ_CMKS01000060.1:1774-2025,CVPJ01000629.1:48-299	NZ_CKYY01000040.1	Streptococcus pneumoniae strain SMRU1773, whole genome shotgun sequence	3057	ALR	nr	bacteria	|-__root|-__cellular_organisms|k__Bacteria|-__Terrabacteria_group|p__Firmicutes|c__Bacilli|o__Lactobacillales|f__Streptococcaceae|g__Streptococcus|s__Streptococcus_pneumoniae
NZ_QVDW01000109.1:1-492	gi|254966946|gb|ACT97501.1|	100	53	0	0	291	449	4	56	7e-24	117.9	ACT97501.1	putative transposase [uncultured organism]	334	live	155900	2009-09-02	2009-09-02		uncultured organism	Unknown	1	GQ343066.1:754-1758	GQ343066.1	Uncultured organism clone CA_O4DDa01_05 tetracycline resistance protein C, tetracycline resistance protein D, and putative transposase genes, complete cds	2995	L1HS_3end	nr	bacteria	|-__root|-__unclassified_sequences|-__environmental_samples|s__uncultured_organism
NZ_CIEA01000101.1:1-1286	gi|1148644368|ref|WP_077387909.1|	97.35	113	3	0	732	1070	1	113	1e-54	223	WP_077387909.1	hypothetical protein [Mycobacterium tuberculosis]	113	live	1773	2017-02-20	2017-02-20		Mycobacterium tuberculosis	Bacteria	1	NZ_FUFR01000266.1:264-605	NZ_FUFR01000266.1	Mycobacterium tuberculosis strain MTB1_M isolate genomic DNA, whole genome shotgun sequence	2989	L1HS_5end	nr	bacteria	|-__root|-__cellular_organisms|k__Bacteria|-__Terrabacteria_group|p__Actinobacteria|c__Actinobacteria|o__Corynebacteriales|f__Mycobacteriaceae|g__Mycobacterium|-__Mycobacterium_tuberculosis_complex|s__Mycobacterium_tuberculosis
NZ_CGZQ01000144.1:144-308	gi|1037156381|embl|SBT56420.1|	100	39	0	0	119	3	285	323	1e-13	83.2	SBT56420.1	PIR Superfamily Protein [Plasmodium ovale wallikeri]	391	live	864142	2016-06-16	2016-06-16		Plasmodium ovale wallikeri	Eukaryota	1	FLRE01001379.1:970-2985	FLRE01001379.1	Plasmodium ovale wallikeri genome assembly, contig: contig1379, whole genome shotgun sequence	2985	ALR	nr	bacteria	|-__root|-__cellular_organisms|k__Eukaryota|-__Alveolata|p__Apicomplexa|c__Aconoidasida|o__Haemosporida|f__Plasmodiidae|g__Plasmodium|-__Plasmodium_(Plasmodium)|s__Plasmodium_ovale|-__Plasmodium_ovale_wallikeri
NZ_AMRJ01000061.1:542-2984	gi|496216328|ref|WP_008930570.1|	100	814	0	0	2442	1	1	814	0	1638.6	WP_008930570.1	DUF1725 domain-containing protein, partial [Alcanivorax hongdengensis]	991	live	519051	2013-05-10	2017-12-13		Alcanivorax hongdengensis	Bacteria	2	NZ_AMRJ01000061.1:8-2984,AMRJ01000061.1:8-2984	NZ_AMRJ01000061.1	Alcanivorax hongdengensis A-11-3 contig62, whole genome shotgun sequence	2984	L1P1_orf2	nr	bacteria	|-__root|-__cellular_organisms|k__Bacteria|p__Proteobacteria|c__Gammaproteobacteria|o__Oceanospirillales|f__Alcanivoracaceae|g__Alcanivorax|s__Alcanivorax_hongdengensis
NZ_FPIJ01000015.1:882-1428	gi|1196979761|ref|WP_086400419.1|	100	182	0	0	546	1	9	190	1e-99	369.8	WP_086400419.1	hypothetical protein [Chlamydia abortus]	201	live	83555	2017-05-24	2017-05-24		Chlamydia abortus	Bacteria	2	NZ_FPIJ01000015.1:846-1451,FPIJ01000015.1:846-1451	NZ_FPIJ01000015.1	Chlamydia abortus strain T20, whole genome shotgun sequence	2975	L1P1_orf2	nr	bacteria	|-__root|-__cellular_organisms|k__Bacteria|-__PVC_group|p__Chlamydiae|c__Chlamydiia|o__Chlamydiales|f__Chlamydiaceae|-__Chlamydia/Chlamydophila_group|g__Chlamydia|s__Chlamydia_abortus
NZ_FTZV01000281.1:1345-1513	gi|1143202208|ref|WP_077128850.1|	100	49	0	0	23	169	1	49	1e-19	103.6	WP_077128850.1	hypothetical protein [Shigella sonnei]	75	live	624	2017-02-08	2017-02-08		Shigella sonnei	Bacteria	2	NZ_FTZV01000281.1:1367-1594,FSLH01000019.1:709-936	NZ_FTZV01000281.1	Shigella sonnei strain sh1364, whole genome shotgun sequence	2945	ALR	nr	bacteria	|-__root|-__cellular_organisms|k__Bacteria|p__Proteobacteria|c__Gammaproteobacteria|o__Enterobacterales|f__Enterobacteriaceae|g__Shigella|s__Shigella_sonnei
NZ_LZLW01000238.1:1-2348	gi|1178443701|ref|WP_082966077.1|	100	782	0	0	3	2348	1	782	0	1573.9	WP_082966077.1	DUF1725 domain-containing protein, partial [Mycobacterium kubicae]	959	live	120959	2017-04-13	2018-08-23		Mycobacterium kubicae	Bacteria	1	NZ_LZLW01000238.1:1-2882	NZ_LZLW01000238.1	Mycobacterium kubicae strain 1146974.2 contig_93, whole genome shotgun sequence	2941	L1P1_orf2	nr	bacteria	|-__root|-__cellular_organisms|k__Bacteria|-__Terrabacteria_group|p__Actinobacteria|c__Actinobacteria|o__Corynebacteriales|f__Mycobacteriaceae|g__Mycobacterium|-__Mycobacterium_simiae_complex|s__Mycobacterium_kubicae
NZ_CSTK01000009.1:39-2907	gi|902126621|embl|CPR46831.1|	100	294	0	0	253	1134	1	294	2e-155	559.7	CPR46831.1	exodeoxyribonuclease III [Chlamydia trachomatis]	294	live	813	2015-03-24	2015-06-12		Chlamydia trachomatis	Bacteria	1	CSTK01000009.1:291-1175	CSTK01000009.1	Chlamydia trachomatis genome assembly 5082_8#4, scaffold ERS013115SCcontig000009, whole genome shotgun sequence	2907	L1P1_orf2	nr	bacteria	|-__root|-__cellular_organisms|k__Bacteria|-__PVC_group|p__Chlamydiae|c__Chlamydiia|o__Chlamydiales|f__Chlamydiaceae|-__Chlamydia/Chlamydophila_group|g__Chlamydia|s__Chlamydia_trachomatis
NZ_LMDS01000003.1:871-1030	gi|620703773|gb|KAK63106.1|	100	44	0	0	148	17	1	44	2e-17	96.3	KAK63106.1	hypothetical protein AZ22_5167 [Bordetella bronchiseptica 980-2]	44	live	1458264	2014-04-29	2014-06-30		Bordetella bronchiseptica 980-2	Bacteria	1	JHOK01000044.1:2277-2411	JHOK01000044.1	Bordetella bronchiseptica 980-2 ctg7180000048726, whole genome shotgun sequence	2895	HSATII	nr	bacteria	|-__root|-__cellular_organisms|k__Bacteria|p__Proteobacteria|c__Betaproteobacteria|o__Burkholderiales|f__Alcaligenaceae|g__Bordetella|s__Bordetella_bronchiseptica|-__Bordetella_bronchiseptica_980-2
NZ_CMKS01000050.1:436-605	gi|620703774|gb|KAK63107.1|	100	45	0	0	135	1	1	45	4e-18	98.2	KAK63107.1	hypothetical protein AZ22_5158 [Bordetella bronchiseptica 980-2]	48	live	1458264	2014-04-29	2014-06-30		Bordetella bronchiseptica 980-2	Bacteria	7	JHOK01000044.1:146-292,CKYY01000039.1:2674-2820,CGZQ01000049.1:6062-6208,CMHF01000056.1:2817-2963,CQSC01000327.1:186-332,CQTE01000215.1:1079-1225,FTZV01000200.1:6141-6287	JHOK01000044.1	Bordetella bronchiseptica 980-2 ctg7180000048726, whole genome shotgun sequence	2895	HSATII	nr	bacteria	|-__root|-__cellular_organisms|k__Bacteria|p__Proteobacteria|c__Betaproteobacteria|o__Burkholderiales|f__Alcaligenaceae|g__Bordetella|s__Bordetella_bronchiseptica|-__Bordetella_bronchiseptica_980-2
NZ_FSLH01000039.1:1-164	gi|620703776|gb|KAK63109.1|	100	46	0	0	155	18	1	46	1e-18	99.8	KAK63109.1	hypothetical protein AZ22_5168 [Bordetella bronchiseptica 980-2]	46	live	1458264	2014-04-29	2014-06-30		Bordetella bronchiseptica 980-2	Bacteria	1	JHOK01000044.1:2508-2648	JHOK01000044.1	Bordetella bronchiseptica 980-2 ctg7180000048726, whole genome shotgun sequence	2895	HSATII	nr	bacteria	|-__root|-__cellular_organisms|k__Bacteria|p__Proteobacteria|c__Betaproteobacteria|o__Burkholderiales|f__Alcaligenaceae|g__Bordetella|s__Bordetella_bronchiseptica|-__Bordetella_bronchiseptica_980-2
NZ_BFCK01000532.1:291-432	gi|620703777|gb|KAK63110.1|	100	38	0	0	135	22	1	38	1e-13	83.6	KAK63110.1	hypothetical protein AZ22_5164 [Bordetella bronchiseptica 980-2]	38	live	1458264	2014-04-29	2014-06-30		Bordetella bronchiseptica 980-2	Bacteria	2	JHOK01000044.1:1276-1392,FTZV01000200.1:5041-5157	JHOK01000044.1	Bordetella bronchiseptica 980-2 ctg7180000048726, whole genome shotgun sequence	2895	HSATII	nr	bacteria	|-__root|-__cellular_organisms|k__Bacteria|p__Proteobacteria|c__Betaproteobacteria|o__Burkholderiales|f__Alcaligenaceae|g__Bordetella|s__Bordetella_bronchiseptica|-__Bordetella_bronchiseptica_980-2
NZ_QLYV01000095.1:4780-4949	gi|620703778|gb|KAK63111.1|	100	46	0	0	20	157	1	46	3e-18	98.6	KAK63111.1	hypothetical protein AZ22_5160 [Bordetella bronchiseptica 980-2]	46	live	1458264	2014-04-29	2014-06-30		Bordetella bronchiseptica 980-2	Bacteria	1	JHOK01000044.1:383-523	JHOK01000044.1	Bordetella bronchiseptica 980-2 ctg7180000048726, whole genome shotgun sequence	2895	HSATII	nr	bacteria	|-__root|-__cellular_organisms|k__Bacteria|p__Proteobacteria|c__Betaproteobacteria|o__Burkholderiales|f__Alcaligenaceae|g__Bordetella|s__Bordetella_bronchiseptica|-__Bordetella_bronchiseptica_980-2
NZ_NQTR01000024.1:417-572	gi|620703779|gb|KAK63112.1|	100	38	0	0	8	121	1	38	8e-14	84	KAK63112.1	hypothetical protein AZ22_5169 [Bordetella bronchiseptica 980-2]	38	live	1458264	2014-04-29	2014-06-30		Bordetella bronchiseptica 980-2	Bacteria	1	JHOK01000044.1:2685-2801	JHOK01000044.1	Bordetella bronchiseptica 980-2 ctg7180000048726, whole genome shotgun sequence	2895	HSATII	nr	bacteria	|-__root|-__cellular_organisms|k__Bacteria|p__Proteobacteria|c__Betaproteobacteria|o__Burkholderiales|f__Alcaligenaceae|g__Bordetella|s__Bordetella_bronchiseptica|-__Bordetella_bronchiseptica_980-2
NZ_JHOK01000044.1:520-686	gi|620703780|gb|KAK63113.1|	100	49	0	0	158	12	1	49	4e-21	108.2	KAK63113.1	hypothetical protein AZ22_5161 [Bordetella bronchiseptica 980-2]	49	live	1458264	2014-04-29	2014-06-30		Bordetella bronchiseptica 980-2	Bacteria	5	JHOK01000044.1:528-677,CKYY01000039.1:2289-2438,CLCE01000362.1:1038-1187,CGZQ01000049.1:234-383,FTZV01000200.1:5756-5905	JHOK01000044.1	Bordetella bronchiseptica 980-2 ctg7180000048726, whole genome shotgun sequence	2895	HSATII	nr	bacteria	|-__root|-__cellular_organisms|k__Bacteria|p__Proteobacteria|c__Betaproteobacteria|o__Burkholderiales|f__Alcaligenaceae|g__Bordetella|s__Bordetella_bronchiseptica|-__Bordetella_bronchiseptica_980-2
NZ_QLYV01000095.1:4362-4534	gi|620703781|gb|KAK63114.1|	100	46	0	0	3	140	3	48	8e-20	104	KAK63114.1	hypothetical protein AZ22_5162 [Bordetella bronchiseptica 980-2]	48	live	1458264	2014-04-29	2014-06-30		Bordetella bronchiseptica 980-2	Bacteria	2	JHOK01000044.1:818-964,CQTE01000215.1:407-553	JHOK01000044.1	Bordetella bronchiseptica 980-2 ctg7180000048726, whole genome shotgun sequence	2895	HSATII	nr	bacteria	|-__root|-__cellular_organisms|k__Bacteria|p__Proteobacteria|c__Betaproteobacteria|o__Burkholderiales|f__Alcaligenaceae|g__Bordetella|s__Bordetella_bronchiseptica|-__Bordetella_bronchiseptica_980-2
NZ_MKGI01000069.1:93-255	gi|620703782|gb|KAK63115.1|	100	38	0	0	10	123	1	38	1e-15	90.1	KAK63115.1	hypothetical protein AZ22_5170 [Bordetella bronchiseptica 980-2]	38	live	1458264	2014-04-29	2014-06-30		Bordetella bronchiseptica 980-2	Bacteria	1	JHOK01000044.1:2776-2892	JHOK01000044.1	Bordetella bronchiseptica 980-2 ctg7180000048726, whole genome shotgun sequence	2895	HSATII	nr	bacteria	|-__root|-__cellular_organisms|k__Bacteria|p__Proteobacteria|c__Betaproteobacteria|o__Burkholderiales|f__Alcaligenaceae|g__Bordetella|s__Bordetella_bronchiseptica|-__Bordetella_bronchiseptica_980-2
NZ_LPSC01000028.1:519-683	gi|620703783|gb|KAK63116.1|	100	39	0	0	19	135	1	39	2e-15	89.4	KAK63116.1	hypothetical protein AZ22_5159 [Bordetella bronchiseptica 980-2]	39	live	1458264	2014-04-29	2014-06-30		Bordetella bronchiseptica 980-2	Bacteria	1	JHOK01000044.1:283-402	JHOK01000044.1	Bordetella bronchiseptica 980-2 ctg7180000048726, whole genome shotgun sequence	2895	HSATII	nr	archaea	|-__root|-__cellular_organisms|k__Bacteria|p__Proteobacteria|c__Betaproteobacteria|o__Burkholderiales|f__Alcaligenaceae|g__Bordetella|s__Bordetella_bronchiseptica|-__Bordetella_bronchiseptica_980-2
NZ_QLYV01000095.1:4065-4234	gi|620703784|gb|KAK63117.1|	100	39	0	0	20	136	1	39	6e-14	84.3	KAK63117.1	hypothetical protein AZ22_5163 [Bordetella bronchiseptica 980-2]	39	live	1458264	2014-04-29	2014-06-30		Bordetella bronchiseptica 980-2	Bacteria	1	JHOK01000044.1:1119-1238	JHOK01000044.1	Bordetella bronchiseptica 980-2 ctg7180000048726, whole genome shotgun sequence	2895	HSATII	nr	bacteria	|-__root|-__cellular_organisms|k__Bacteria|p__Proteobacteria|c__Betaproteobacteria|o__Burkholderiales|f__Alcaligenaceae|g__Bordetella|s__Bordetella_bronchiseptica|-__Bordetella_bronchiseptica_980-2
NZ_NARM01000239.1:149-355	gi|895651815|embl|CNX46374.1|	100	30	0	0	1	90	3	32	1e-08	67	CNX46374.1	Uncharacterised protein [Mycobacterium tuberculosis]	32	live	1773	2015-03-23	2015-06-14		Mycobacterium tuberculosis	Bacteria	1	CQSC01000215.1:793-891	CQSC01000215.1	Mycobacterium tuberculosis genome assembly 5227_6#11, scaffold ERS013440SCcontig000215, whole genome shotgun sequence	2826	HSATII	nr	bacteria	|-__root|-__cellular_organisms|k__Bacteria|-__Terrabacteria_group|p__Actinobacteria|c__Actinobacteria|o__Corynebacteriales|f__Mycobacteriaceae|g__Mycobacterium|-__Mycobacterium_tuberculosis_complex|s__Mycobacterium_tuberculosis
NZ_FRWH01000198.1:176-411	gi|895651817|embl|CNX46426.1|	100	67	0	0	222	22	1	67	8e-22	110.5	CNX46426.1	Uncharacterised protein [Mycobacterium tuberculosis]	67	live	1773	2015-03-23	2015-06-14		Mycobacterium tuberculosis	Bacteria	1	CQSC01000215.1:1079-1282	CQSC01000215.1	Mycobacterium tuberculosis genome assembly 5227_6#11, scaffold ERS013440SCcontig000215, whole genome shotgun sequence	2826	HSATII	nr	bacteria	|-__root|-__cellular_organisms|k__Bacteria|-__Terrabacteria_group|p__Actinobacteria|c__Actinobacteria|o__Corynebacteriales|f__Mycobacteriaceae|g__Mycobacterium|-__Mycobacterium_tuberculosis_complex|s__Mycobacterium_tuberculosis
NZ_QLYU01000057.1:274-449	gi|895651822|embl|CNX46546.1|	100	31	0	0	8	100	1	31	7e-11	74.3	CNX46546.1	Uncharacterised protein [Mycobacterium tuberculosis]	31	live	1773	2015-03-23	2015-06-14		Mycobacterium tuberculosis	Bacteria	1	CQSC01000215.1:2312-2407	CQSC01000215.1	Mycobacterium tuberculosis genome assembly 5227_6#11, scaffold ERS013440SCcontig000215, whole genome shotgun sequence	2826	HSATII	nr	bacteria	|-__root|-__cellular_organisms|k__Bacteria|-__Terrabacteria_group|p__Actinobacteria|c__Actinobacteria|o__Corynebacteriales|f__Mycobacteriaceae|g__Mycobacterium|-__Mycobacterium_tuberculosis_complex|s__Mycobacterium_tuberculosis
NZ_FPIH01000023.1:675-2529	gi|23482635|gb|EAA18562.1|	98.89	451	5	0	1353	1	1	451	6e-266	925.6	EAA18562.1	hypothetical protein, partial [Plasmodium yoelii yoelii]	627	live	73239	2002-10-03	2002-10-03		Plasmodium yoelii yoelii	Eukaryota	1	AABL01002139.1:168-2051	AABL01002139.1	Plasmodium yoelii yoelii 17XNL contig MALPY02146, whole genome shotgun sequence	2816	L1P1_orf2	nr	bacteria	|-__root|-__cellular_organisms|k__Eukaryota|-__Alveolata|p__Apicomplexa|c__Aconoidasida|o__Haemosporida|f__Plasmodiidae|g__Plasmodium|-__Plasmodium_(Vinckeia)|s__Plasmodium_yoelii|-__Plasmodium_yoelii_yoelii
NZ_QKVX01000015.1:741-904	gi|1119739567|ref|WP_072651134.1|	100	54	0	0	2	163	22	75	7e-29	134	WP_072651134.1	hypothetical protein [Escherichia coli]	99	live	562	2016-12-18	2016-12-18		Escherichia coli	Bacteria	2	NZ_MOHL01000098.1:365-664,MOHL01000098.1:365-664	NZ_MOHL01000098.1	Escherichia coli strain 626 BN4_626_1__paired__contig_99, whole genome shotgun sequence	2797	HSATII	nr	bacteria	|-__root|-__cellular_organisms|k__Bacteria|p__Proteobacteria|c__Gammaproteobacteria|o__Enterobacterales|f__Enterobacteriaceae|g__Escherichia|s__Escherichia_coli
NZ_FRWH01000198.1:176-411	gi|1119739569|ref|WP_072651136.1|	97.01	67	2	0	222	22	1	67	4e-21	108.2	WP_072651136.1	hypothetical protein [Escherichia coli]	67	live	562	2016-12-18	2016-12-18		Escherichia coli	Bacteria	2	NZ_MOHL01000098.1:1721-1924,MOHL01000098.1:1721-1924	NZ_MOHL01000098.1	Escherichia coli strain 626 BN4_626_1__paired__contig_99, whole genome shotgun sequence	2797	HSATII	nr	bacteria	|-__root|-__cellular_organisms|k__Bacteria|p__Proteobacteria|c__Gammaproteobacteria|o__Enterobacterales|f__Enterobacteriaceae|g__Escherichia|s__Escherichia_coli
NZ_CQSC01000216.1:1-2790	gi|1154813028|ref|WP_078728722.1|	100	929	0	0	2789	3	1	929	0	1871.7	WP_078728722.1	endonuclease, partial [Mycobacterium tuberculosis]	929	live	1773	2017-03-10	2017-03-10		Mycobacterium tuberculosis	Bacteria	1	NZ_CQSC01000216.1:1-2790	NZ_CQSC01000216.1	Mycobacterium tuberculosis strain O00100977, whole genome shotgun sequence	2790	L1P1_orf2	nr	bacteria	|-__root|-__cellular_organisms|k__Bacteria|-__Terrabacteria_group|p__Actinobacteria|c__Actinobacteria|o__Corynebacteriales|f__Mycobacteriaceae|g__Mycobacterium|-__Mycobacterium_tuberculosis_complex|s__Mycobacterium_tuberculosis
NZ_JHDX01000043.1:64-234	gi|884051294|embl|CKC07685.1|	100	57	0	0	1	171	2	58	1e-23	116.7	CKC07685.1	Uncharacterised protein [Streptococcus pneumoniae]	131	live	1313	2015-03-23	2015-06-13		Streptococcus pneumoniae	Bacteria	1	CMKS01000061.1:1716-2111	CMKS01000061.1	Streptococcus pneumoniae genome assembly 7054_4#6, scaffold ERS022540SCcontig000061, whole genome shotgun sequence	2781	ALR	nr	bacteria	|-__root|-__cellular_organisms|k__Bacteria|-__Terrabacteria_group|p__Firmicutes|c__Bacilli|o__Lactobacillales|f__Streptococcaceae|g__Streptococcus|s__Streptococcus_pneumoniae
NZ_QLYT01000039.1:169-339	gi|913376256|ref|WP_050389105.1|	100	57	0	0	171	1	39	95	1e-27	129.8	WP_050389105.1	MULTISPECIES: hypothetical protein [Bacilli]	135	live	91061	2015-08-06	2018-07-15		Bacilli	Bacteria	3	NZ_CMKS01000061.1:1482-1889,NZ_QLYT01000039.1:46-453,QLYT01000039.1:46-453	NZ_CMKS01000061.1	Streptococcus pneumoniae strain SMRU3030, whole genome shotgun sequence	2781	ALR	nr	bacteria	|-__root|-__cellular_organisms|k__Bacteria|-__Terrabacteria_group|p__Firmicutes|c__Bacilli
NZ_PWDA01000069.1:588-2776	gi|1376198899|ref|WP_107318012.1|	100	729	0	0	2187	1	1	729	0	1476.1	WP_107318012.1	DUF1725 domain-containing protein, partial [Klebsiella pneumoniae]	906	live	573	2018-04-11	2018-04-17		Klebsiella pneumoniae	Bacteria	1	NZ_PWDA01000069.1:54-2776	NZ_PWDA01000069.1	Klebsiella pneumoniae strain WCHKP020109 NODE_70_length_2776_cov_8.669406, whole genome shotgun sequence	2776	L1P1_orf2	nr	bacteria	|-__root|-__cellular_organisms|k__Bacteria|p__Proteobacteria|c__Gammaproteobacteria|o__Enterobacterales|f__Enterobacteriaceae|g__Klebsiella|s__Klebsiella_pneumoniae
NZ_CMKS01000111.1:176-346	gi|1037157238|embl|SBT55496.1|	100	43	0	0	169	41	139	181	3e-15	89	SBT55496.1	hypothetical protein POVWA2_068210 [Plasmodium ovale wallikeri]	181	live	864142	2016-06-16	2016-06-16		Plasmodium ovale wallikeri	Eukaryota	1	FLRE01000912.1:1-1342	FLRE01000912.1	Plasmodium ovale wallikeri genome assembly, contig: contig912, whole genome shotgun sequence	2771	ALR	nr	bacteria	|-__root|-__cellular_organisms|k__Eukaryota|-__Alveolata|p__Apicomplexa|c__Aconoidasida|o__Haemosporida|f__Plasmodiidae|g__Plasmodium|-__Plasmodium_(Plasmodium)|s__Plasmodium_ovale|-__Plasmodium_ovale_wallikeri
NZ_CMKS01000111.1:5-175	gi|1037157239|embl|SBT55497.1|	97.37	38	1	0	115	2	1	38	6e-12	77.8	SBT55497.1	hypothetical protein POVWA2_068220 [Plasmodium ovale wallikeri]	82	live	864142	2016-06-16	2016-06-16		Plasmodium ovale wallikeri	Eukaryota	1	FLRE01000912.1:1436-1684	FLRE01000912.1	Plasmodium ovale wallikeri genome assembly, contig: contig912, whole genome shotgun sequence	2771	ALR	nr	bacteria	|-__root|-__cellular_organisms|k__Eukaryota|-__Alveolata|p__Apicomplexa|c__Aconoidasida|o__Haemosporida|f__Plasmodiidae|g__Plasmodium|-__Plasmodium_(Plasmodium)|s__Plasmodium_ovale|-__Plasmodium_ovale_wallikeri
NZ_QLYV01000047.1:324-494	gi|912654301|ref|WP_050218429.1|	100	57	0	0	1	171	2	58	1e-23	116.7	WP_050218429.1	hypothetical protein [Streptococcus pneumoniae]	92	live	1313	2015-08-05	2015-08-05		Streptococcus pneumoniae	Bacteria	4	NZ_CGZQ01000059.1:1072-1350,NZ_CMHC01000039.1:338-616,NZ_CMHF01000061.1:1335-1613,NZ_CMKS01000061.1:470-748	NZ_CGZQ01000059.1	Streptococcus pneumoniae strain SMRU2282, whole genome shotgun sequence	2735	ALR	nr	bacteria	|-__root|-__cellular_organisms|k__Bacteria|-__Terrabacteria_group|p__Firmicutes|c__Bacilli|o__Lactobacillales|f__Streptococcaceae|g__Streptococcus|s__Streptococcus_pneumoniae
NZ_MOCR01000111.1:91-261	gi|1037154951|embl|SBT57960.1|	97.92	48	1	0	27	170	201	248	1e-18	100.1	SBT57960.1	PIR Superfamily Protein [Plasmodium ovale wallikeri]	251	live	864142	2016-06-16	2016-06-16		Plasmodium ovale wallikeri	Eukaryota	1	FLRE01002099.1:1497-2667	FLRE01002099.1	Plasmodium ovale wallikeri genome assembly, contig: contig2099, whole genome shotgun sequence	2667	ALR	nr	bacteria	|-__root|-__cellular_organisms|k__Eukaryota|-__Alveolata|p__Apicomplexa|c__Aconoidasida|o__Haemosporida|f__Plasmodiidae|g__Plasmodium|-__Plasmodium_(Plasmodium)|s__Plasmodium_ovale|-__Plasmodium_ovale_wallikeri
NZ_MULI01000170.1:3-1881	gi|1348197374|gb|PPS68588.1|	100	138	0	0	845	1258	1	138	1e-73	286.6	PPS68588.1	hypothetical protein BZZ08_07390 [Streptomyces sp. MH60]	138	live	1940758	2018-02-23	2018-02-23		Streptomyces sp. MH60	Bacteria	1	MULI01000170.1:847-1263	MULI01000170.1	Streptomyces sp. MH60 BZZ08_170, whole genome shotgun sequence	2656	L1P1_orf2	nr	bacteria	|-__root|-__cellular_organisms|k__Bacteria|-__Terrabacteria_group|p__Actinobacteria|c__Actinobacteria|o__Streptomycetales|f__Streptomycetaceae|g__Streptomyces|s__Streptomyces_sp._MH60
NZ_PYQD01000162.1:1-738	gi|1348197375|gb|PPS68589.1|	97.21	215	6	0	738	94	60	274	6e-123	448.4	PPS68589.1	hypothetical protein BZZ08_07391 [Streptomyces sp. MH60]	282	live	1940758	2018-02-23	2018-02-23		Streptomyces sp. MH60	Bacteria	1	MULI01000170.1:1555-2403	MULI01000170.1	Streptomyces sp. MH60 BZZ08_170, whole genome shotgun sequence	2656	L1HS_3end	nr	bacteria	|-__root|-__cellular_organisms|k__Bacteria|-__Terrabacteria_group|p__Actinobacteria|c__Actinobacteria|o__Streptomycetales|f__Streptomycetaceae|g__Streptomyces|s__Streptomyces_sp._MH60
NZ_MULI01000170.1:3-1881	gi|1351103388|ref|WP_104636718.1|	99.75	404	1	0	47	1258	1	404	1e-229	805.1	WP_104636718.1	hypothetical protein [Streptomyces sp. MH60]	404	live	1940758	2018-02-27	2018-02-27		Streptomyces sp. MH60	Bacteria	1	NZ_MULI01000170.1:49-1263	NZ_MULI01000170.1	Streptomyces sp. MH60 BZZ08_170, whole genome shotgun sequence	2656	L1P1_orf2	nr	bacteria	|-__root|-__cellular_organisms|k__Bacteria|-__Terrabacteria_group|p__Actinobacteria|c__Actinobacteria|o__Streptomycetales|f__Streptomycetaceae|g__Streptomyces|s__Streptomyces_sp._MH60
NZ_APIF01000022.1:1-620	gi|975866666|gb|KUY43862.1|	95.14	144	7	0	134	565	7	150	6e-76	291.6	KUY43862.1	hypothetical protein AWN58_18135 [Vibrio cholerae]	150	live	666	2016-01-21	2016-01-21		Vibrio cholerae	Bacteria	1	LRBH01000056.1:408-860	LRBH01000056.1	Vibrio cholerae strain M888 contig00056, whole genome shotgun sequence	2647	L1P1_orf2	nr	bacteria	|-__root|-__cellular_organisms|k__Bacteria|p__Proteobacteria|c__Gammaproteobacteria|o__Vibrionales|f__Vibrionaceae|g__Vibrio|s__Vibrio_cholerae
NZ_PYPV01000220.1:1-658	gi|975866667|gb|KUY43863.1|	98.04	153	3	0	641	183	1	153	2e-83	316.2	KUY43863.1	hypothetical protein AWN58_18140 [Vibrio cholerae]	153	live	666	2016-01-21	2016-01-21		Vibrio cholerae	Bacteria	1	LRBH01000056.1:833-1294	LRBH01000056.1	Vibrio cholerae strain M888 contig00056, whole genome shotgun sequence	2647	L1P1_orf2	nr	bacteria	|-__root|-__cellular_organisms|k__Bacteria|p__Proteobacteria|c__Gammaproteobacteria|o__Vibrionales|f__Vibrionaceae|g__Vibrio|s__Vibrio_cholerae
NZ_NTTD01000083.1:1-1431	gi|975866669|gb|KUY43865.1|	96.77	93	3	0	349	627	1	93	4e-43	184.9	KUY43865.1	hypothetical protein AWN58_18150 [Vibrio cholerae]	93	live	666	2016-01-21	2016-01-21		Vibrio cholerae	Bacteria	1	LRBH01000056.1:1664-1945	LRBH01000056.1	Vibrio cholerae strain M888 contig00056, whole genome shotgun sequence	2647	L1P1_orf2	nr	bacteria	|-__root|-__cellular_organisms|k__Bacteria|p__Proteobacteria|c__Gammaproteobacteria|o__Vibrionales|f__Vibrionaceae|g__Vibrio|s__Vibrio_cholerae
NZ_ALQK01000043.1:644-2603	gi|446243248|ref|WP_000321103.1|	100	653	0	0	1959	1	1	653	0	1322	WP_000321103.1	DUF1725 domain-containing protein, partial [Streptococcus agalactiae]	830	live	1311	2013-02-04	2017-12-13		Streptococcus agalactiae	Bacteria	2	NZ_ALQK01000043.1:110-2603,ALQK01000043.1:110-2603	NZ_ALQK01000043.1	Streptococcus agalactiae CCUG 19094 ctg7180000003036, whole genome shotgun sequence	2603	L1P1_orf2	nr	bacteria	|-__root|-__cellular_organisms|k__Bacteria|-__Terrabacteria_group|p__Firmicutes|c__Bacilli|o__Lactobacillales|f__Streptococcaceae|g__Streptococcus|s__Streptococcus_agalactiae
NZ_FTZV01000301.1:552-722	gi|1037144378|embl|SBT56044.1|	100	57	0	0	171	1	272	328	7e-24	117.5	SBT56044.1	hypothetical protein POVWA1_073990 [Plasmodium ovale wallikeri]	333	live	864142	2016-06-16	2016-06-16		Plasmodium ovale wallikeri	Eukaryota	1	FLRD01000983.1:166-1823	FLRD01000983.1	Plasmodium ovale wallikeri genome assembly, contig: contig983, whole genome shotgun sequence	2595	ALR	nr	bacteria	|-__root|-__cellular_organisms|k__Eukaryota|-__Alveolata|p__Apicomplexa|c__Aconoidasida|o__Haemosporida|f__Plasmodiidae|g__Plasmodium|-__Plasmodium_(Plasmodium)|s__Plasmodium_ovale|-__Plasmodium_ovale_wallikeri
NZ_QLYU01000057.1:797-995	gi|1179645873|embl|SME40752.1|	100	30	0	0	110	199	1	30	6e-09	67.8	SME40752.1	Uncharacterised protein [Klebsiella pneumoniae]	66	live	573	2017-04-13	2017-04-13		Klebsiella pneumoniae	Bacteria	1	FWYR01000060.1:227-427	FWYR01000060.1	Klebsiella pneumoniae isolate KP03M genome assembly, contig: gnlProkkacontig000060, whole genome shotgun sequence	2592	HSATII	nr	bacteria	|-__root|-__cellular_organisms|k__Bacteria|p__Proteobacteria|c__Gammaproteobacteria|o__Enterobacterales|f__Enterobacteriaceae|g__Klebsiella|s__Klebsiella_pneumoniae
NZ_QLYU01000057.1:274-449	gi|1179645874|embl|SME40761.1|	100	31	0	0	8	100	1	31	3e-10	72	SME40761.1	Uncharacterised protein [Klebsiella pneumoniae]	31	live	573	2017-04-13	2017-04-13		Klebsiella pneumoniae	Bacteria	1	FWYR01000060.1:982-1077	FWYR01000060.1	Klebsiella pneumoniae isolate KP03M genome assembly, contig: gnlProkkacontig000060, whole genome shotgun sequence	2592	HSATII	nr	bacteria	|-__root|-__cellular_organisms|k__Bacteria|p__Proteobacteria|c__Gammaproteobacteria|o__Enterobacterales|f__Enterobacteriaceae|g__Klebsiella|s__Klebsiella_pneumoniae
NZ_FRWQ01000331.1:203-404	gi|1179645875|embl|SME40768.1|	100	39	0	0	29	145	1	39	6e-14	84.3	SME40768.1	Uncharacterised protein [Klebsiella pneumoniae]	39	live	573	2017-04-13	2017-04-13		Klebsiella pneumoniae	Bacteria	1	FWYR01000060.1:1088-1207	FWYR01000060.1	Klebsiella pneumoniae isolate KP03M genome assembly, contig: gnlProkkacontig000060, whole genome shotgun sequence	2592	HSATII	nr	bacteria	|-__root|-__cellular_organisms|k__Bacteria|p__Proteobacteria|c__Gammaproteobacteria|o__Enterobacterales|f__Enterobacteriaceae|g__Klebsiella|s__Klebsiella_pneumoniae
NZ_KV810669.1:112-309	gi|1179645878|embl|SME40791.1|	100	54	0	0	197	36	18	71	2e-27	129.4	SME40791.1	Uncharacterised protein [Klebsiella pneumoniae]	71	live	573	2017-04-13	2017-04-13		Klebsiella pneumoniae	Bacteria	1	FWYR01000060.1:1962-2177	FWYR01000060.1	Klebsiella pneumoniae isolate KP03M genome assembly, contig: gnlProkkacontig000060, whole genome shotgun sequence	2592	HSATII	nr	bacteria	|-__root|-__cellular_organisms|k__Bacteria|p__Proteobacteria|c__Gammaproteobacteria|o__Enterobacterales|f__Enterobacteriaceae|g__Klebsiella|s__Klebsiella_pneumoniae
NZ_FRWP01001030.1:1-160	gi|1184644935|ref|WP_085205617.1|	100	49	0	0	13	159	1	49	6e-12	77.8	WP_085205617.1	hypothetical protein [Klebsiella pneumoniae]	66	live	573	2017-04-22	2017-04-22		Klebsiella pneumoniae	Bacteria	1	NZ_FWYR01000060.1:1897-2097	NZ_FWYR01000060.1	Klebsiella pneumoniae isolate KP03M, whole genome shotgun sequence	2592	HSATII	nr	bacteria	|-__root|-__cellular_organisms|k__Bacteria|p__Proteobacteria|c__Gammaproteobacteria|o__Enterobacterales|f__Enterobacteriaceae|g__Klebsiella|s__Klebsiella_pneumoniae
NZ_LZSC01000001.1:2017-5310	gi|569346236|gb|ETO03995.1|	99.47	756	4	0	1027	3294	1	756	0	1516.9	ETO03995.1	hypothetical protein RFI_33407, partial [Reticulomyxa filosa]	774	live	46433	2013-12-30	2013-12-30		Reticulomyxa filosa	Eukaryota	1	ASPP01030955.1:1-2322	ASPP01030955.1	Reticulomyxa filosa solexa1547406_1.f1.exp, whole genome shotgun sequence	2532	L1P1_orf2	nr	bacteria	|-__root|-__cellular_organisms|k__Eukaryota|-__Rhizaria|-__Foraminifera|-__Monothalamids|f__Reticulomyxidae|g__Reticulomyxa|s__Reticulomyxa_filosa
NZ_MRTG01000031.1:1-1717	gi|1133948272|ref|WP_076320422.1|	100	572	0	0	2	1717	1	572	0	1163.7	WP_076320422.1	DUF1725 domain-containing protein, partial [Paenibacillus amylolyticus]	749	live	1451	2017-01-20	2017-12-12		Paenibacillus amylolyticus	Bacteria	2	NZ_MRTG01000031.1:1-2251,MRTG01000031.1:1-2251	NZ_MRTG01000031.1	Paenibacillus amylolyticus strain FSL F4-0260 NODE_31_length_2530_cov_0.026738_ID_3131, whole genome shotgun sequence	2530	L1P1_orf2	nr	bacteria	|-__root|-__cellular_organisms|k__Bacteria|-__Terrabacteria_group|p__Firmicutes|c__Bacilli|o__Bacillales|f__Paenibacillaceae|g__Paenibacillus|s__Paenibacillus_amylolyticus
NZ_MLZH01000033.1:612-2525	gi|1150763850|ref|WP_077958170.1|	100	638	0	0	1914	1	1	638	0	1294.3	WP_077958170.1	DUF1725 domain-containing protein, partial [Salmonella enterica]	815	live	28901	2017-03-02	2017-12-14		Salmonella enterica	Bacteria	1	NZ_MLZH01000033.1:78-2525	NZ_MLZH01000033.1	Salmonella enterica subsp. enterica serovar Saintpaul strain CFSAN045032 CFSAN045032_33, whole genome shotgun sequence	2525	L1P1_orf2	nr	bacteria	|-__root|-__cellular_organisms|k__Bacteria|p__Proteobacteria|c__Gammaproteobacteria|o__Enterobacterales|f__Enterobacteriaceae|g__Salmonella|s__Salmonella_enterica
NZ_QKVY01000002.1:222-392	gi|1382142239|ref|WP_108011516.1|	100	57	0	0	1	171	39	95	2e-27	129	WP_108011516.1	hypothetical protein [Mycobacterium tuberculosis]	135	live	1773	2018-04-25	2018-04-25		Mycobacterium tuberculosis	Bacteria	1	NZ_PYPZ01000119.1:84-491	NZ_PYPZ01000119.1	Mycobacterium tuberculosis strain AUH13 NODE_124_length_2507_cov_6.73751, whole genome shotgun sequence	2507	ALR	nr	bacteria	|-__root|-__cellular_organisms|k__Bacteria|-__Terrabacteria_group|p__Actinobacteria|c__Actinobacteria|o__Corynebacteriales|f__Mycobacteriaceae|g__Mycobacterium|-__Mycobacterium_tuberculosis_complex|s__Mycobacterium_tuberculosis
NZ_FPIH01000010.1:6347-7681	gi|23485048|gb|EAA20174.1|	99.57	233	1	0	2	700	9	241	2e-131	478	EAA20174.1	Endonuclease/Exonuclease/phosphatase family [Plasmodium yoelii yoelii]	245	live	73239	2002-10-03	2002-10-03		Plasmodium yoelii yoelii	Eukaryota	1	AABL01002860.1:119-856	AABL01002860.1	Plasmodium yoelii yoelii 17XNL contig MALPY02872, whole genome shotgun sequence	2496	L1P1_orf2	nr	bacteria	|-__root|-__cellular_organisms|k__Eukaryota|-__Alveolata|p__Apicomplexa|c__Aconoidasida|o__Haemosporida|f__Plasmodiidae|g__Plasmodium|-__Plasmodium_(Vinckeia)|s__Plasmodium_yoelii|-__Plasmodium_yoelii_yoelii
NZ_FQSZ01000002.1:3949-6601	gi|23485049|gb|EAA20175.1|	98.33	480	8	0	230	1669	1	480	9e-259	902.5	EAA20175.1	Reverse transcriptase, putative [Plasmodium yoelii yoelii]	484	live	73239	2002-10-03	2002-10-03		Plasmodium yoelii yoelii	Eukaryota	1	AABL01002860.1:1011-2465	AABL01002860.1	Plasmodium yoelii yoelii 17XNL contig MALPY02872, whole genome shotgun sequence	2496	L1P1_orf2	nr	bacteria	|-__root|-__cellular_organisms|k__Eukaryota|-__Alveolata|p__Apicomplexa|c__Aconoidasida|o__Haemosporida|f__Plasmodiidae|g__Plasmodium|-__Plasmodium_(Vinckeia)|s__Plasmodium_yoelii|-__Plasmodium_yoelii_yoelii
NZ_MUNL01000068.1:601-2485	gi|1207613031|ref|WP_087978826.1|	100	628	0	0	1884	1	2	629	0	1275.4	WP_087978826.1	DUF1725 domain-containing protein, partial [Bacillus safensis]	806	live	561879	2017-06-15	2017-12-13		Bacillus safensis	Bacteria	2	NZ_MUNL01000068.1:67-2489,MUNL01000068.1:67-2489	NZ_MUNL01000068.1	Bacillus safensis strain Bcs96 Contig68, whole genome shotgun sequence	2489	L1P1_orf2	nr	bacteria	|-__root|-__cellular_organisms|k__Bacteria|-__Terrabacteria_group|p__Firmicutes|c__Bacilli|o__Bacillales|f__Bacillaceae|g__Bacillus|s__Bacillus_safensis
NZ_NTTD01000083.1:1-1431	gi|1260308982|gb|PEY46871.1|	100	466	0	0	28	1425	1	466	8e-267	927.9	PEY46871.1	endonuclease, partial [Bacillus thuringiensis]	466	live	1428	2017-10-16	2017-10-16		Bacillus thuringiensis	Bacteria	1	NTTD01000083.1:28-1425	NTTD01000083.1	Bacillus thuringiensis strain AFS019758 AFS019758_110_C11_Contig87_140523, whole genome shotgun sequence	2473	L1P1_orf2	nr	bacteria	|-__root|-__cellular_organisms|k__Bacteria|-__Terrabacteria_group|p__Firmicutes|c__Bacilli|o__Bacillales|f__Bacillaceae|g__Bacillus|-__Bacillus_cereus_group|s__Bacillus_thuringiensis
NZ_NTTD01000083.1:1913-2473	gi|1260308983|gb|PEY46872.1|	100	160	0	0	82	561	1	160	4e-94	351.3	PEY46872.1	endonuclease, partial [Bacillus thuringiensis]	160	live	1428	2017-10-16	2017-10-16		Bacillus thuringiensis	Bacteria	1	NTTD01000083.1:1994-2473	NTTD01000083.1	Bacillus thuringiensis strain AFS019758 AFS019758_110_C11_Contig87_140523, whole genome shotgun sequence	2473	L1HS_3end	nr	bacteria	|-__root|-__cellular_organisms|k__Bacteria|-__Terrabacteria_group|p__Firmicutes|c__Bacilli|o__Bacillales|f__Bacillaceae|g__Bacillus|-__Bacillus_cereus_group|s__Bacillus_thuringiensis
NZ_FPIJ01000009.1:1501-2185	gi|1190689913|embl|SGW39129.1|	97.26	219	5	1	3	656	27	245	2e-114	419.9	SGW39129.1	L1 transposable element [Chlamydia abortus]	257	live	83555	2017-05-10	2017-05-10		Chlamydia abortus	Bacteria	1	FQLK01000004.1:17-790	FQLK01000004.1	Chlamydia abortus strain 11_01 genome assembly, contig: ERS067066SCcontig000004, whole genome shotgun sequence	2460	L1PBa_5end	nr	bacteria	|-__root|-__cellular_organisms|k__Bacteria|-__PVC_group|p__Chlamydiae|c__Chlamydiia|o__Chlamydiales|f__Chlamydiaceae|-__Chlamydia/Chlamydophila_group|g__Chlamydia|s__Chlamydia_abortus
NZ_FPIJ01000009.1:1501-2185	gi|1196973519|ref|WP_086395266.1|	97.26	219	5	1	3	656	32	250	2e-114	419.9	WP_086395266.1	hypothetical protein, partial [Chlamydia abortus]	262	live	83555	2017-05-24	2017-05-24		Chlamydia abortus	Bacteria	1	NZ_FQLK01000004.1:1-790	NZ_FQLK01000004.1	Chlamydia abortus strain 11_01, whole genome shotgun sequence	2460	L1PBa_5end	nr	bacteria	|-__root|-__cellular_organisms|k__Bacteria|-__PVC_group|p__Chlamydiae|c__Chlamydiia|o__Chlamydiales|f__Chlamydiaceae|-__Chlamydia/Chlamydophila_group|g__Chlamydia|s__Chlamydia_abortus
NZ_FQLM01000003.1:4122-5041	gi|1196973520|ref|WP_086395267.1|	95.76	236	10	0	918	211	89	324	8e-124	451.8	WP_086395267.1	hypothetical protein [Chlamydia abortus]	324	live	83555	2017-05-24	2017-05-24		Chlamydia abortus	Bacteria	3	NZ_FQLK01000004.1:930-1904,FPIH01000014.1:31-1005,FQLK01000004.1:930-1904	NZ_FQLK01000004.1	Chlamydia abortus strain 11_01, whole genome shotgun sequence	2460	L1PBa_5end	nr	bacteria	|-__root|-__cellular_organisms|k__Bacteria|-__PVC_group|p__Chlamydiae|c__Chlamydiia|o__Chlamydiales|f__Chlamydiaceae|-__Chlamydia/Chlamydophila_group|g__Chlamydia|s__Chlamydia_abortus
NZ_QUZQ01000057.1:599-2658	gi|1174840195|ref|WP_081520884.1|	99.69	647	2	0	1941	1	1	647	0	1172.1	WP_081520884.1	DUF1725 domain-containing protein, partial [Pseudomonas sp. T]	819	live	1938440	2017-04-08	2017-12-11		Pseudomonas sp. T	Bacteria	2	NZ_MUHV01000021.1:1-2458,MUHV01000021.1:1-2458	NZ_MUHV01000021.1	Pseudomonas sp. T sc_021, whole genome shotgun sequence	2458	L1P1_orf2	nr	bacteria	|-__root|-__cellular_organisms|k__Bacteria|p__Proteobacteria|c__Gammaproteobacteria|o__Pseudomonadales|f__Pseudomonadaceae|g__Pseudomonas|s__Pseudomonas_sp._T
NZ_FQLL01000005.1:2080-3150	gi|950129161|ref|WP_057184891.1|	100	285	0	0	2	856	10	294	2e-164	587.4	WP_057184891.1	hypothetical protein [Chlamydia trachomatis]	294	live	813	2015-11-09	2015-11-09		Chlamydia trachomatis	Bacteria	2	NZ_CVNJ01000006.1:281-1165,CVNJ01000006.1:281-1165	NZ_CVNJ01000006.1	Chlamydia trachomatis strain R28017IMS, whole genome shotgun sequence	2409	L1P1_orf2	nr	bacteria	|-__root|-__cellular_organisms|k__Bacteria|-__PVC_group|p__Chlamydiae|c__Chlamydiia|o__Chlamydiales|f__Chlamydiaceae|-__Chlamydia/Chlamydophila_group|g__Chlamydia|s__Chlamydia_trachomatis
NZ_FPMI01000004.1:66-3359	gi|1190728993|embl|SGA32286.1|	100	284	0	0	852	1	1	284	9e-157	563.9	SGA32286.1	Retron-type reverse transcriptase [Chlamydia abortus]	461	live	83555	2017-05-10	2017-05-10		Chlamydia abortus	Bacteria	1	FPMT01000099.1:824-2209	FPMT01000099.1	Chlamydia abortus strain C20_98 genome assembly, contig: ERS067044SCcontig000099, whole genome shotgun sequence	2390	L1P1_orf2	nr	bacteria	|-__root|-__cellular_organisms|k__Bacteria|-__PVC_group|p__Chlamydiae|c__Chlamydiia|o__Chlamydiales|f__Chlamydiaceae|-__Chlamydia/Chlamydophila_group|g__Chlamydia|s__Chlamydia_abortus
NZ_FQLM01000005.1:869-1526	gi|1190699142|embl|SGW38830.1|	100	214	0	0	2	643	10	223	6e-120	438	SGW38830.1	exonuclease III [Chlamydia abortus]	223	live	83555	2017-05-10	2017-05-10		Chlamydia abortus	Bacteria	1	FQLM01000005.1:843-1514	FQLM01000005.1	Chlamydia abortus strain 15a genome assembly, contig: ERS067078SCcontig000005, whole genome shotgun sequence	2369	L1P1_orf2	nr	bacteria	|-__root|-__cellular_organisms|k__Bacteria|-__PVC_group|p__Chlamydiae|c__Chlamydiia|o__Chlamydiales|f__Chlamydiaceae|-__Chlamydia/Chlamydophila_group|g__Chlamydia|s__Chlamydia_abortus
NZ_FQLM01000005.1:318-612	gi|1197015679|ref|WP_086427337.1|	100	97	0	0	3	293	10	106	4e-49	201.4	WP_086427337.1	hypothetical protein [Chlamydia abortus]	169	live	83555	2017-05-24	2017-05-24		Chlamydia abortus	Bacteria	2	NZ_FQLM01000005.1:293-802,FQLM01000005.1:293-802	NZ_FQLM01000005.1	Chlamydia abortus strain 15a, whole genome shotgun sequence	2369	L1P1_orf2	nr	bacteria	|-__root|-__cellular_organisms|k__Bacteria|-__PVC_group|p__Chlamydiae|c__Chlamydiia|o__Chlamydiales|f__Chlamydiaceae|-__Chlamydia/Chlamydophila_group|g__Chlamydia|s__Chlamydia_abortus
NZ_FQLM01000005.1:869-1526	gi|1197015680|ref|WP_086427338.1|	100	214	0	0	2	643	3	216	6e-120	438	WP_086427338.1	hypothetical protein [Chlamydia abortus]	216	live	83555	2017-05-24	2017-05-24		Chlamydia abortus	Bacteria	1	NZ_FQLM01000005.1:864-1514	NZ_FQLM01000005.1	Chlamydia abortus strain 15a, whole genome shotgun sequence	2369	L1P1_orf2	nr	bacteria	|-__root|-__cellular_organisms|k__Bacteria|-__PVC_group|p__Chlamydiae|c__Chlamydiia|o__Chlamydiales|f__Chlamydiaceae|-__Chlamydia/Chlamydophila_group|g__Chlamydia|s__Chlamydia_abortus
NZ_CKYY01000043.1:1052-1222	gi|881214946|embl|CJE28316.1|	100	57	0	0	1	171	153	209	1e-23	116.7	CJE28316.1	Uncharacterised protein [Streptococcus pneumoniae]	214	live	1313	2015-03-21	2015-06-13		Streptococcus pneumoniae	Bacteria	1	CKYY01000043.1:596-1240	CKYY01000043.1	Streptococcus pneumoniae genome assembly 6840_1#21, scaffold ERS021283SCcontig000043, whole genome shotgun sequence	2357	ALR	nr	bacteria	|-__root|-__cellular_organisms|k__Bacteria|-__Terrabacteria_group|p__Firmicutes|c__Bacilli|o__Lactobacillales|f__Streptococcaceae|g__Streptococcus|s__Streptococcus_pneumoniae
NZ_QLYT01000039.1:169-339	gi|912654300|ref|WP_050218428.1|	100	57	0	0	171	1	39	95	1e-27	129.8	WP_050218428.1	hypothetical protein [Streptococcus pneumoniae]	135	live	1313	2015-08-05	2015-08-05		Streptococcus pneumoniae	Bacteria	3	NZ_CKYY01000044.1:939-1346,NZ_CMHC01000039.1:1464-1871,NZ_CMHF01000061.1:194-601	NZ_CKYY01000044.1	Streptococcus pneumoniae strain SMRU1773, whole genome shotgun sequence	2336	ALR	nr	bacteria	|-__root|-__cellular_organisms|k__Bacteria|-__Terrabacteria_group|p__Firmicutes|c__Bacilli|o__Lactobacillales|f__Streptococcaceae|g__Streptococcus|s__Streptococcus_pneumoniae
NZ_PSSM01000124.1:1-537	gi|1132998588|gb|OMC92748.1|	99.21	127	1	0	448	68	1	127	3e-74	285.4	OMC92748.1	hypothetical protein BJP46_31215, partial [Paenibacillus odorifer]	127	live	189426	2017-01-18	2017-01-18		Paenibacillus odorifer	Bacteria	1	MKQK01000104.1:1955-2334	MKQK01000104.1	Paenibacillus odorifer strain FSL F4-0152 NODE_72_length_2334_cov_0.0353468_ID_7949, whole genome shotgun sequence	2334	L1HS_3end	nr	bacteria	|-__root|-__cellular_organisms|k__Bacteria|-__Terrabacteria_group|p__Firmicutes|c__Bacilli|o__Bacillales|f__Paenibacillaceae|g__Paenibacillus|s__Paenibacillus_odorifer
NZ_MKQK01000104.1:1-1894	gi|1133722772|ref|WP_076107126.1|	100	631	0	0	2	1894	1	631	0	1282.7	WP_076107126.1	endonuclease, partial [Paenibacillus odorifer]	778	live	189426	2017-01-20	2017-01-20		Paenibacillus odorifer	Bacteria	1	NZ_MKQK01000104.1:1-2334	NZ_MKQK01000104.1	Paenibacillus odorifer strain FSL F4-0152 NODE_72_length_2334_cov_0.0353468_ID_7949, whole genome shotgun sequence	2334	L1P1_orf2	nr	bacteria	|-__root|-__cellular_organisms|k__Bacteria|-__Terrabacteria_group|p__Firmicutes|c__Bacilli|o__Bacillales|f__Paenibacillaceae|g__Paenibacillus|s__Paenibacillus_odorifer
NZ_FRWP01000042.1:1-645	gi|1132834740|gb|OMB33615.1|	99.36	157	1	0	136	606	1	157	5e-92	345.1	OMB33615.1	hypothetical protein BLX63_05260 [Salmonella enterica subsp. enterica serovar Newport]	157	live	108619	2017-01-18	2017-01-18		Salmonella enterica subsp. enterica serovar Newport	Bacteria	1	MODH01000041.1:60-533	MODH01000041.1	Salmonella enterica subsp. enterica serovar Newport strain R8_2690_R1 NODE_94_length_2310_cov_0.0375396_ID_187, whole genome shotgun sequence	2310	L1HS_3end	nr	bacteria	|-__root|-__cellular_organisms|k__Bacteria|p__Proteobacteria|c__Gammaproteobacteria|o__Enterobacterales|f__Enterobacteriaceae|g__Salmonella|s__Salmonella_enterica|-__Salmonella_enterica_subsp._enterica|-__Salmonella_enterica_subsp._enterica_serovar_Newport
NZ_MODH01000041.1:594-2310	gi|1133793375|ref|WP_076173707.1|	100	572	0	0	1716	1	1	572	0	1163.3	WP_076173707.1	DUF1725 domain-containing protein, partial [Salmonella enterica]	749	live	28901	2017-01-20	2017-12-12		Salmonella enterica	Bacteria	1	NZ_MODH01000041.1:60-2310	NZ_MODH01000041.1	Salmonella enterica subsp. enterica serovar Newport strain R8_2690_R1 NODE_94_length_2310_cov_0.0375396_ID_187, whole genome shotgun sequence	2310	L1P1_orf2	nr	bacteria	|-__root|-__cellular_organisms|k__Bacteria|p__Proteobacteria|c__Gammaproteobacteria|o__Enterobacterales|f__Enterobacteriaceae|g__Salmonella|s__Salmonella_enterica
NZ_FQSZ01000002.1:6603-7541	gi|1196979765|ref|WP_086400423.1|	100	284	0	0	88	939	1	284	2e-169	603.6	WP_086400423.1	DUF1725 domain-containing protein [Chlamydia abortus]	460	live	83555	2017-05-24	2017-07-09		Chlamydia abortus	Bacteria	2	NZ_FPIJ01000028.1:7-1389,FPIJ01000028.1:7-1389	NZ_FPIJ01000028.1	Chlamydia abortus strain T20, whole genome shotgun sequence	2302	L1P1_orf2	nr	bacteria	|-__root|-__cellular_organisms|k__Bacteria|-__PVC_group|p__Chlamydiae|c__Chlamydiia|o__Chlamydiales|f__Chlamydiaceae|-__Chlamydia/Chlamydophila_group|g__Chlamydia|s__Chlamydia_abortus
NZ_FRWP01000042.1:1-645	gi|1096626662|gb|OIF08882.1|	98	200	4	0	7	606	1	200	1e-116	427.2	OIF08882.1	hypothetical protein A7M43_18900 [Acinetobacter baumannii]	200	live	470	2016-11-02	2016-11-02		Acinetobacter baumannii	Bacteria	1	LYIQ01000099.1:86-688	LYIQ01000099.1	Acinetobacter baumannii strain XH705 XH705_contig_70, whole genome shotgun sequence	2299	L1HS_3end	nr	bacteria	|-__root|-__cellular_organisms|k__Bacteria|p__Proteobacteria|c__Gammaproteobacteria|o__Pseudomonadales|f__Moraxellaceae|g__Acinetobacter|-__Acinetobacter_calcoaceticus/baumannii_complex|s__Acinetobacter_baumannii
NZ_LYIQ01000099.1:620-2299	gi|1162400176|ref|WP_079863889.1|	100	560	0	0	1680	1	1	560	0	1140.6	WP_079863889.1	DUF1725 domain-containing protein, partial [Acinetobacter baumannii]	737	live	470	2017-03-20	2017-12-12		Acinetobacter baumannii	Bacteria	1	NZ_LYIQ01000099.1:86-2299	NZ_LYIQ01000099.1	Acinetobacter baumannii strain XH705 XH705_contig_70, whole genome shotgun sequence	2299	L1P1_orf2	nr	bacteria	|-__root|-__cellular_organisms|k__Bacteria|p__Proteobacteria|c__Gammaproteobacteria|o__Pseudomonadales|f__Moraxellaceae|g__Acinetobacter|-__Acinetobacter_calcoaceticus/baumannii_complex|s__Acinetobacter_baumannii
NZ_MSZI01000075.1:128-784	gi|733519631|gb|KHM00719.1|	99.36	157	1	0	155	625	1	157	1e-91	343.6	KHM00719.1	hypothetical protein KV24_16685 [Enterobacter hormaechei subsp. oharae]	157	live	301102	2014-12-16	2016-06-15		Enterobacter hormaechei subsp. oharae	Bacteria	1	JUHX01000041.1:1785-2258	JUHX01000041.1	Enterobacter hormaechei subsp. oharae strain ND14 contig41, whole genome shotgun sequence	2276	L1HS_3end	nr	bacteria	|-__root|-__cellular_organisms|k__Bacteria|p__Proteobacteria|c__Gammaproteobacteria|o__Enterobacterales|f__Enterobacteriaceae|g__Enterobacter|-__Enterobacter_cloacae_complex|s__Enterobacter_hormaechei|-__Enterobacter_hormaechei_subsp._oharae
NZ_JUHX01000041.1:1-1724	gi|918030930|ref|WP_052319469.1|	100	574	0	0	3	1724	1	574	0	1166.8	WP_052319469.1	DUF1725 domain-containing protein, partial [Enterobacter hormaechei]	751	live	158836	2015-08-18	2017-12-12		Enterobacter hormaechei	Bacteria	1	NZ_JUHX01000041.1:1-2258	NZ_JUHX01000041.1	Enterobacter hormaechei subsp. oharae strain ND14 contig41, whole genome shotgun sequence	2276	L1P1_orf2	nr	bacteria	|-__root|-__cellular_organisms|k__Bacteria|p__Proteobacteria|c__Gammaproteobacteria|o__Enterobacterales|f__Enterobacteriaceae|g__Enterobacter|-__Enterobacter_cloacae_complex|s__Enterobacter_hormaechei
NZ_FQLK01000004.1:94-712	gi|1196985428|ref|WP_086404987.1|	100	128	0	0	2	385	130	257	4e-65	255.4	WP_086404987.1	hypothetical protein [Chlamydia abortus]	340	live	83555	2017-05-24	2017-05-24		Chlamydia abortus	Bacteria	2	NZ_FPIH01000024.1:946-1968,FPIH01000024.1:946-1968	NZ_FPIH01000024.1	Chlamydia abortus strain 86/30, whole genome shotgun sequence	2261	L1PBa_5end	nr	bacteria	|-__root|-__cellular_organisms|k__Bacteria|-__PVC_group|p__Chlamydiae|c__Chlamydiia|o__Chlamydiales|f__Chlamydiaceae|-__Chlamydia/Chlamydophila_group|g__Chlamydia|s__Chlamydia_abortus
NZ_FQSZ01000002.1:3949-6601	gi|23484456|gb|EAA19779.1|	98.96	289	3	0	1787	2653	13	301	4e-168	601.3	EAA19779.1	hypothetical protein [Plasmodium yoelii yoelii]	477	live	73239	2002-10-03	2002-10-03		Plasmodium yoelii yoelii	Eukaryota	1	AABL01002683.1:108-1541	AABL01002683.1	Plasmodium yoelii yoelii 17XNL contig MALPY02691, whole genome shotgun sequence	2247	L1P1_orf2	nr	bacteria	|-__root|-__cellular_organisms|k__Eukaryota|-__Alveolata|p__Apicomplexa|c__Aconoidasida|o__Haemosporida|f__Plasmodiidae|g__Plasmodium|-__Plasmodium_(Vinckeia)|s__Plasmodium_yoelii|-__Plasmodium_yoelii_yoelii
NZ_FTZV01000301.1:552-722	gi|809852516|embl|CJS63439.1|	100	57	0	0	171	1	96	152	7e-24	117.5	CJS63439.1	Uncharacterised protein [Streptococcus pneumoniae]	157	live	1313	2015-04-21	2015-06-14		Streptococcus pneumoniae	Bacteria	1	CGZQ01000063.1:675-1148	CGZQ01000063.1	Streptococcus pneumoniae genome assembly 6983_4#74, scaffold ERS021791SCcontig000063, whole genome shotgun sequence	2222	ALR	nr	bacteria	|-__root|-__cellular_organisms|k__Bacteria|-__Terrabacteria_group|p__Firmicutes|c__Bacilli|o__Lactobacillales|f__Streptococcaceae|g__Streptococcus|s__Streptococcus_pneumoniae
NZ_AUNH01000085.1:1843-2007	gi|1153963890|ref|WP_078447263.1|	100	54	0	0	2	163	25	78	4e-26	124.8	WP_078447263.1	hypothetical protein [Mycobacterium tuberculosis]	108	live	1773	2017-03-08	2018-01-11		Mycobacterium tuberculosis	Bacteria	1	NZ_AUNH01000085.1:1866-2192	NZ_AUNH01000085.1	Mycobacterium tuberculosis Mtb194 contig_105, whole genome shotgun sequence	2210	HSATII	nr	bacteria	|-__root|-__cellular_organisms|k__Bacteria|-__Terrabacteria_group|p__Actinobacteria|c__Actinobacteria|o__Corynebacteriales|f__Mycobacteriaceae|g__Mycobacterium|-__Mycobacterium_tuberculosis_complex|s__Mycobacterium_tuberculosis
NZ_FQSZ01000002.1:3949-6601	gi|1104566142|embl|SBW38362.1|	99.54	432	2	0	278	1573	2	433	5e-236	827	SBW38362.1	Reverse transcriptase (RNA-dependent DNA polymerase), putative, partial [Plasmodium berghei]	433	live	5821	2016-09-10	2016-09-10		Plasmodium berghei	Eukaryota	1	FLVA01000271.1:7-1305	FLVA01000271.1	Plasmodium berghei strain NK65e genome assembly, contig: scaffold84_size2206_1_1578, whole genome shotgun sequence	2206	L1P1_orf2	nr	bacteria	|-__root|-__cellular_organisms|k__Eukaryota|-__Alveolata|p__Apicomplexa|c__Aconoidasida|o__Haemosporida|f__Plasmodiidae|g__Plasmodium|-__Plasmodium_(Vinckeia)|s__Plasmodium_berghei
NZ_FPIK01000017.1:1-1003	gi|1104566143|embl|SBW38363.1|	100	169	0	0	54	560	1	169	2e-94	354.8	SBW38363.1	hypothetical protein, conserved, partial [Plasmodium berghei]	169	live	5821	2016-09-10	2016-09-10		Plasmodium berghei	Eukaryota	1	FLVA01000271.1:1606-2113	FLVA01000271.1	Plasmodium berghei strain NK65e genome assembly, contig: scaffold84_size2206_1_1578, whole genome shotgun sequence	2206	L1P1_orf2	nr	bacteria	|-__root|-__cellular_organisms|k__Eukaryota|-__Alveolata|p__Apicomplexa|c__Aconoidasida|o__Haemosporida|f__Plasmodiidae|g__Plasmodium|-__Plasmodium_(Vinckeia)|s__Plasmodium_berghei
NZ_FTZV01000301.1:552-722	gi|884243845|embl|CJZ88591.1|	100	57	0	0	171	1	153	209	7e-24	117.5	CJZ88591.1	Uncharacterised protein [Streptococcus pneumoniae]	214	live	1313	2015-03-22	2015-06-12		Streptococcus pneumoniae	Bacteria	1	CMHF01000063.1:1137-1781	CMHF01000063.1	Streptococcus pneumoniae genome assembly 7038_5#15, scaffold ERS022477SCcontig000063, whole genome shotgun sequence	2191	ALR	nr	bacteria	|-__root|-__cellular_organisms|k__Bacteria|-__Terrabacteria_group|p__Firmicutes|c__Bacilli|o__Lactobacillales|f__Streptococcaceae|g__Streptococcus|s__Streptococcus_pneumoniae
NZ_FRWH01000198.1:176-411	gi|1373388379|gb|PTB87854.1|	98.51	67	1	0	222	22	1	67	1e-21	109.8	PTB87854.1	hypothetical protein C9925_01235 [cyanobacterium G8-9]	67	live	2137193	2018-04-02	2018-04-02		cyanobacterium G8-9	Bacteria	1	PYVJ01000036.1:893-1096	PYVJ01000036.1	Cyanobacterium G8-9 strain G8-9 NODE_40_length_2174_cov_2.24917, whole genome shotgun sequence	2174	HSATII	nr	bacteria	|-__root|-__cellular_organisms|k__Bacteria|-__Terrabacteria_group|-__Cyanobacteria/Melainabacteria_group|p__Cyanobacteria|-__unclassified_Cyanobacteria|-__unclassified_Cyanobacteria_(miscellaneous)|s__cyanobacterium_G8-9
NZ_FPIK01000013.1:4819-5850	gi|1196977854|ref|WP_086398684.1|	99.5	201	1	0	1	603	2	202	3e-112	413.7	WP_086398684.1	hypothetical protein, partial [Chlamydia abortus]	202	live	83555	2017-05-24	2017-05-24		Chlamydia abortus	Bacteria	1	NZ_FPML01000009.1:1556-2163	NZ_FPML01000009.1	Chlamydia abortus strain 86_33, whole genome shotgun sequence	2163	L1P1_orf2	nr	bacteria	|-__root|-__cellular_organisms|k__Bacteria|-__PVC_group|p__Chlamydiae|c__Chlamydiia|o__Chlamydiales|f__Chlamydiaceae|-__Chlamydia/Chlamydophila_group|g__Chlamydia|s__Chlamydia_abortus
NZ_CIEA01000101.1:1-1286	gi|1158560417|ref|WP_079088533.1|	100	338	0	0	57	1070	1	338	3e-180	640.2	WP_079088533.1	hypothetical protein [Mycobacterium tuberculosis]	338	live	1773	2017-03-12	2018-01-10		Mycobacterium tuberculosis	Bacteria	1	NZ_CIEA01000101.1:57-1073	NZ_CIEA01000101.1	Mycobacterium tuberculosis strain Bir 177, whole genome shotgun sequence	2161	L1HS_5end	nr	bacteria	|-__root|-__cellular_organisms|k__Bacteria|-__Terrabacteria_group|p__Actinobacteria|c__Actinobacteria|o__Corynebacteriales|f__Mycobacteriaceae|g__Mycobacterium|-__Mycobacterium_tuberculosis_complex|s__Mycobacterium_tuberculosis
NZ_CIEA01000101.1:1-1286	gi|814697462|embl|CKT04850.1|	100	304	0	0	159	1070	1	304	9e-160	572	CKT04850.1	L1 transposable element [Mycobacterium tuberculosis]	304	live	1773	2015-04-21	2015-06-14		Mycobacterium tuberculosis	Bacteria	1	CIEA01000101.1:159-1073	CIEA01000101.1	Mycobacterium tuberculosis genome assembly 6540_3#9, scaffold ERS027651SCcontig000101, whole genome shotgun sequence	2161	L1HS_5end	nr	bacteria	|-__root|-__cellular_organisms|k__Bacteria|-__Terrabacteria_group|p__Actinobacteria|c__Actinobacteria|o__Corynebacteriales|f__Mycobacteriaceae|g__Mycobacterium|-__Mycobacterium_tuberculosis_complex|s__Mycobacterium_tuberculosis
NZ_JHBZ01000078.1:605-2153	gi|620691259|gb|KAK51372.1|	100	504	0	0	1512	1	1	504	1e-295	1023.8	KAK51372.1	PF08333 family protein [Bordetella bronchiseptica OSU054]	681	live	1331254	2014-04-29	2014-04-29		Bordetella bronchiseptica OSU054	Bacteria	1	JHBZ01000078.1:71-2116	JHBZ01000078.1	Bordetella bronchiseptica OSU054 ctg7180000005052, whole genome shotgun sequence	2153	L1P1_orf2	nr	bacteria	|-__root|-__cellular_organisms|k__Bacteria|p__Proteobacteria|c__Betaproteobacteria|o__Burkholderiales|f__Alcaligenaceae|g__Bordetella|s__Bordetella_bronchiseptica|-__Bordetella_bronchiseptica_OSU054
NZ_LZSE01000010.1:1742-5035	gi|1044533239|ref|XP_017411387.1|	99.3	712	5	0	91	2226	1	712	0	1406	XP_017411387.1	PREDICTED: LINE-1 retrotransposable element ORF2 protein, partial [Vigna angularis]	712	live	3914	2016-07-18	2016-07-18		Vigna angularis	Eukaryota	2	NW_016115435.1:9-2144,XM_017555898.1:1-2136	NW_016115435.1	Vigna angularis cultivar Jingnong 6 unplaced genomic scaffold, Vigan1.1 scaffold1223, whole genome shotgun sequence	2151	L1P1_orf2	nr	bacteria	|-__root|-__cellular_organisms|k__Eukaryota|-__Viridiplantae|p__Streptophyta|-__Streptophytina|-__Embryophyta|-__Tracheophyta|-__Euphyllophyta|-__Spermatophyta|-__Magnoliophyta|-__Mesangiospermae|-__eudicotyledons|-__Gunneridae|-__Pentapetalae|-__rosids|-__fabids|o__Fabales|f__Fabaceae|-__Papilionoideae|-__50_kb_inversion_clade|-__NPAAA_clade|-__indigoferoid/millettioid_clade|-__Phaseoleae|g__Vig…
NZ_LPSC01000024.1:1-1925	gi|1308083754|gb|PKK56807.1|	100	91	0	0	1057	1329	1	91	2e-42	183.3	PKK56807.1	hypothetical protein RhiirC2_626477, partial [Rhizophagus irregularis]	91	live	588596	2017-12-13	2017-12-13		Rhizophagus irregularis	Eukaryota	1	LLXL01005091.1:604-876	LLXL01005091.1	Rhizophagus irregularis strain C2 scaffold5093_size2147, whole genome shotgun sequence	2147	L1P1_orf2	nr	archaea	|-__root|-__cellular_organisms|k__Eukaryota|-__Opisthokonta|-__Fungi|-__Fungi_incertae_sedis|p__Mucoromycota|-__Glomeromycotina|c__Glomeromycetes|o__Glomerales|f__Glomeraceae|g__Rhizophagus|s__Rhizophagus_irregularis
NZ_FPIJ01000012.1:1161-3588	gi|23484469|gb|EAA19787.1|	99.33	300	2	0	1445	2344	1	300	2e-176	629	EAA19787.1	Unknown protein, partial [Plasmodium yoelii yoelii]	305	live	73239	2002-10-03	2002-10-03		Plasmodium yoelii yoelii	Eukaryota	1	AABL01002688.1:1-920	AABL01002688.1	Plasmodium yoelii yoelii 17XNL contig MALPY02696, whole genome shotgun sequence	2119	L1P1_orf2	nr	bacteria	|-__root|-__cellular_organisms|k__Eukaryota|-__Alveolata|p__Apicomplexa|c__Aconoidasida|o__Haemosporida|f__Plasmodiidae|g__Plasmodium|-__Plasmodium_(Vinckeia)|s__Plasmodium_yoelii|-__Plasmodium_yoelii_yoelii
NZ_FPIL01000018.1:1-462	gi|23484471|gb|EAA19789.1|	97.14	35	1	0	337	441	1	35	1e-09	70.9	EAA19789.1	hypothetical protein [Plasmodium yoelii yoelii]	35	live	73239	2002-10-03	2002-10-03		Plasmodium yoelii yoelii	Eukaryota	1	AABL01002688.1:1410-1517	AABL01002688.1	Plasmodium yoelii yoelii 17XNL contig MALPY02696, whole genome shotgun sequence	2119	L1HS_3end	nr	bacteria	|-__root|-__cellular_organisms|k__Eukaryota|-__Alveolata|p__Apicomplexa|c__Aconoidasida|o__Haemosporida|f__Plasmodiidae|g__Plasmodium|-__Plasmodium_(Vinckeia)|s__Plasmodium_yoelii|-__Plasmodium_yoelii_yoelii
NZ_FTZV01000294.1:1314-3058	gi|1363110804|gb|PSF27028.1|	99.28	138	1	0	978	565	1	138	2e-60	242.7	PSF27028.1	hypothetical protein C7H19_25050, partial [Aphanothece hegewaldii CCALA 016]	139	live	2107694	2018-03-18	2018-03-18		Aphanothece hegewaldii CCALA 016	Bacteria	1	PXOH01000093.1:1-421	PXOH01000093.1	Aphanothece hegewaldii CCALA 016 NODE_567_length_2194_cov_0.274445_ID_75999, whole genome shotgun sequence	2118	L1HS_5end	nr	bacteria	|-__root|-__cellular_organisms|k__Bacteria|-__Terrabacteria_group|-__Cyanobacteria/Melainabacteria_group|p__Cyanobacteria|-__Oscillatoriophycideae|o__Chroococcales|f__Aphanothecaceae|g__Aphanothece|s__Aphanothece_hegewaldii|-__Aphanothece_hegewaldii_CCALA_016
NZ_PXOH01000093.1:828-2118	gi|1363110806|gb|PSF27030.1|	100	336	0	0	283	1290	1	336	2e-190	673.7	PSF27030.1	endonuclease, partial [Aphanothece hegewaldii CCALA 016]	336	live	2107694	2018-03-18	2018-03-18		Aphanothece hegewaldii CCALA 016	Bacteria	1	PXOH01000093.1:1110-2118	PXOH01000093.1	Aphanothece hegewaldii CCALA 016 NODE_567_length_2194_cov_0.274445_ID_75999, whole genome shotgun sequence	2118	L1P1_orf2	nr	bacteria	|-__root|-__cellular_organisms|k__Bacteria|-__Terrabacteria_group|-__Cyanobacteria/Melainabacteria_group|p__Cyanobacteria|-__Oscillatoriophycideae|o__Chroococcales|f__Aphanothecaceae|g__Aphanothece|s__Aphanothece_hegewaldii|-__Aphanothece_hegewaldii_CCALA_016
NZ_NDFI01000037.1:332-958	gi|1368999132|ref|WP_106459616.1|	97.35	113	3	0	555	217	1	113	1e-55	224.2	WP_106459616.1	hypothetical protein [Aphanothece hegewaldii]	113	live	1521625	2018-03-23	2018-03-23		Aphanothece hegewaldii	Bacteria	2	NZ_PXOH01000093.1:423-764,PXOH01000093.1:423-764	NZ_PXOH01000093.1	Aphanothece hegewaldii CCALA 016 NODE_567_length_2194_cov_0.274445_ID_75999, whole genome shotgun sequence	2118	L1HS_5end	nr	bacteria	|-__root|-__cellular_organisms|k__Bacteria|-__Terrabacteria_group|-__Cyanobacteria/Melainabacteria_group|p__Cyanobacteria|-__Oscillatoriophycideae|o__Chroococcales|f__Aphanothecaceae|g__Aphanothece|s__Aphanothece_hegewaldii
NZ_FPIH01000023.1:675-2529	gi|1104566153|embl|SBW38361.1|	100	384	0	0	1152	1	1	384	8e-229	802.4	SBW38361.1	Protein of unknown function (DUF1725), putative, partial [Plasmodium berghei]	592	live	5821	2016-09-10	2016-09-10		Plasmodium berghei	Eukaryota	1	FLVA01000270.1:1-2097	FLVA01000270.1	Plasmodium berghei strain NK65e genome assembly, contig: scaffold84_size2113_1589_3701, whole genome shotgun sequence	2113	L1P1_orf2	nr	bacteria	|-__root|-__cellular_organisms|k__Eukaryota|-__Alveolata|p__Apicomplexa|c__Aconoidasida|o__Haemosporida|f__Plasmodiidae|g__Plasmodium|-__Plasmodium_(Vinckeia)|s__Plasmodium_berghei
NZ_QLYT01000039.1:340-510	gi|1327608497|ref|WP_102022345.1|	100	57	0	0	1	171	22	78	2e-24	119	WP_102022345.1	hypothetical protein [Klebsiella pneumoniae]	112	live	573	2018-01-11	2018-01-11		Klebsiella pneumoniae	Bacteria	1	NZ_NWDR01000084.1:421-759	NZ_NWDR01000084.1	Klebsiella pneumoniae subsp. pneumoniae strain WCHKP020127 NODE_87_length_2112_cov_13.7995, whole genome shotgun sequence	2112	ALR	nr	bacteria	|-__root|-__cellular_organisms|k__Bacteria|p__Proteobacteria|c__Gammaproteobacteria|o__Enterobacterales|f__Enterobacteriaceae|g__Klebsiella|s__Klebsiella_pneumoniae
NZ_FQLL01000005.1:2080-3150	gi|23483752|gb|EAA19319.1|	96.64	268	9	0	2	805	10	277	2e-147	530.4	EAA19319.1	Endonuclease/Exonuclease/phosphatase family [Plasmodium yoelii yoelii]	277	live	73239	2002-10-03	2002-10-03		Plasmodium yoelii yoelii	Eukaryota	1	AABL01002463.1:1202-2035	AABL01002463.1	Plasmodium yoelii yoelii 17XNL contig MALPY02470, whole genome shotgun sequence	2104	L1P1_orf2	nr	bacteria	|-__root|-__cellular_organisms|k__Eukaryota|-__Alveolata|p__Apicomplexa|c__Aconoidasida|o__Haemosporida|f__Plasmodiidae|g__Plasmodium|-__Plasmodium_(Vinckeia)|s__Plasmodium_yoelii|-__Plasmodium_yoelii_yoelii
NZ_CGZQ01000062.1:110-280	gi|951098015|ref|WP_057589220.1|	100	57	0	0	171	1	22	78	2e-24	119.4	WP_057589220.1	hypothetical protein [Streptococcus pneumoniae]	85	live	1313	2015-11-10	2015-11-10		Streptococcus pneumoniae	Bacteria	1	NZ_CGZQ01000062.1:86-343	NZ_CGZQ01000062.1	Streptococcus pneumoniae strain SMRU2282, whole genome shotgun sequence	2104	ALR	nr	bacteria	|-__root|-__cellular_organisms|k__Bacteria|-__Terrabacteria_group|p__Firmicutes|c__Bacilli|o__Lactobacillales|f__Streptococcaceae|g__Streptococcus|s__Streptococcus_pneumoniae
NZ_FQSZ01000002.1:6603-7541	gi|23484927|gb|EAA20097.1|	99.61	256	1	0	172	939	1	256	2e-151	543.5	EAA20097.1	hypothetical protein, partial [Plasmodium yoelii yoelii]	432	live	73239	2002-10-03	2002-10-03		Plasmodium yoelii yoelii	Eukaryota	1	AABL01002821.1:36-1336	AABL01002821.1	Plasmodium yoelii yoelii 17XNL contig MALPY02829, whole genome shotgun sequence	2101	L1P1_orf2	nr	bacteria	|-__root|-__cellular_organisms|k__Eukaryota|-__Alveolata|p__Apicomplexa|c__Aconoidasida|o__Haemosporida|f__Plasmodiidae|g__Plasmodium|-__Plasmodium_(Vinckeia)|s__Plasmodium_yoelii|-__Plasmodium_yoelii_yoelii
NZ_MWPX01000113.1:630-2078	gi|1198278121|gb|OUM45767.1|	100	483	0	0	1449	1	1	483	1e-283	984.2	OUM45767.1	endonuclease, partial [Bacillus pseudomycoides]	660	live	64104	2017-05-26	2017-05-26		Bacillus pseudomycoides	Bacteria	1	MWPX01000113.1:96-2078	MWPX01000113.1	Bacillus pseudomycoides strain FSL K6-0042 NODE_113_length_2078_cov_0_0323396_ID_11877, whole genome shotgun sequence	2078	L1P1_orf2	nr	bacteria	|-__root|-__cellular_organisms|k__Bacteria|-__Terrabacteria_group|p__Firmicutes|c__Bacilli|o__Bacillales|f__Bacillaceae|g__Bacillus|-__Bacillus_cereus_group|s__Bacillus_pseudomycoides
NZ_QKVX01000023.1:1-2055	gi|1404551529|gb|PZM32806.1|	100	684	0	0	2054	3	1	684	0	1375.9	PZM32806.1	endonuclease, partial [Salmonella enterica subsp. enterica serovar Derby]	685	live	28144	2018-06-18	2018-06-18		Salmonella enterica subsp. enterica serovar Derby	Bacteria	1	QKVX01000023.1:1-2055	QKVX01000023.1	Salmonella enterica subsp. enterica serovar Derby strain 201510930 201510930_55, whole genome shotgun sequence	2055	L1P1_orf2	nr	bacteria	|-__root|-__cellular_organisms|k__Bacteria|p__Proteobacteria|c__Gammaproteobacteria|o__Enterobacterales|f__Enterobacteriaceae|g__Salmonella|s__Salmonella_enterica|-__Salmonella_enterica_subsp._enterica|-__Salmonella_enterica_subsp._enterica_serovar_Derby
NZ_FQLK01000016.1:1-293	gi|1190717779|embl|SFW05959.1|	98.78	82	1	0	46	291	28	109	1e-36	159.8	SFW05959.1	Uncharacterised protein [Chlamydia abortus]	116	live	83555	2017-05-10	2017-05-10		Chlamydia abortus	Bacteria	1	FPIH01000022.1:736-1086	FPIH01000022.1	Chlamydophila abortus strain 86/30 genome assembly, contig: ERS008766SCcontig000022, whole genome shotgun sequence	2032	L1HS_3end	nr	bacteria	|-__root|-__cellular_organisms|k__Bacteria|-__PVC_group|p__Chlamydiae|c__Chlamydiia|o__Chlamydiales|f__Chlamydiaceae|-__Chlamydia/Chlamydophila_group|g__Chlamydia|s__Chlamydia_abortus
NZ_QLYW01000044.1:1-875	gi|881214943|embl|CJE28435.1|	100	75	0	0	594	370	1	75	1e-38	169.1	CJE28435.1	Uncharacterised protein [Streptococcus pneumoniae]	75	live	1313	2015-03-21	2015-06-13		Streptococcus pneumoniae	Bacteria	5	CKYY01000045.1:1095-1322,CLCE01000758.1:745-972,CMHF01000049.1:1066-1293,CMIB01000048.1:979-1206,NDZR01000024.1:1245-1472	CKYY01000045.1	Streptococcus pneumoniae genome assembly 6840_1#21, scaffold ERS021283SCcontig000045, whole genome shotgun sequence	2027	L1P1_orf2	nr	bacteria	|-__root|-__cellular_organisms|k__Bacteria|-__Terrabacteria_group|p__Firmicutes|c__Bacilli|o__Lactobacillales|f__Streptococcaceae|g__Streptococcus|s__Streptococcus_pneumoniae
NZ_NKRE01000046.1:278-507	gi|912673044|ref|WP_050226860.1|	100	71	0	0	17	229	1	71	6e-39	167.5	WP_050226860.1	hypothetical protein [Streptococcus pneumoniae]	76	live	1313	2015-08-05	2015-08-05		Streptococcus pneumoniae	Bacteria	1	NZ_CKYY01000046.1:1792-2022	NZ_CKYY01000046.1	Streptococcus pneumoniae strain SMRU1773, whole genome shotgun sequence	2024	HSATII	nr	bacteria	|-__root|-__cellular_organisms|k__Bacteria|-__Terrabacteria_group|p__Firmicutes|c__Bacilli|o__Lactobacillales|f__Streptococcaceae|g__Streptococcus|s__Streptococcus_pneumoniae
NZ_JUHX01000041.1:1-1724	gi|1373388357|gb|PTB87841.1|	98.65	445	6	0	390	1724	1	445	2e-257	897.1	PTB87841.1	endonuclease, partial [cyanobacterium G8-9]	622	live	2137193	2018-04-02	2018-04-02		cyanobacterium G8-9	Bacteria	1	PYVJ01000039.1:152-2022	PYVJ01000039.1	Cyanobacterium G8-9 strain G8-9 NODE_43_length_2022_cov_14.0412, whole genome shotgun sequence	2022	L1P1_orf2	nr	bacteria	|-__root|-__cellular_organisms|k__Bacteria|-__Terrabacteria_group|-__Cyanobacteria/Melainabacteria_group|p__Cyanobacteria|-__unclassified_Cyanobacteria|-__unclassified_Cyanobacteria_(miscellaneous)|s__cyanobacterium_G8-9
NZ_PYPV01000136.1:1-1375	gi|1382147784|ref|WP_108016261.1|	98.73	79	1	0	265	29	1	79	6e-35	157.5	WP_108016261.1	hypothetical protein [Mycobacterium tuberculosis]	79	live	1773	2018-04-25	2018-04-25		Mycobacterium tuberculosis	Bacteria	1	NZ_PYPV01000136.1:26-265	NZ_PYPV01000136.1	Mycobacterium tuberculosis strain AUH8 NODE_143_length_2016_cov_0.577554, whole genome shotgun sequence	2016	L1PBa_5end	nr	bacteria	|-__root|-__cellular_organisms|k__Bacteria|-__Terrabacteria_group|p__Actinobacteria|c__Actinobacteria|o__Corynebacteriales|f__Mycobacteriaceae|g__Mycobacterium|-__Mycobacterium_tuberculosis_complex|s__Mycobacterium_tuberculosis
NZ_PYPV01000136.1:1-1375	gi|1382147785|ref|WP_108016262.1|	99.46	184	1	0	707	156	1	184	1e-95	359	WP_108016262.1	hypothetical protein [Mycobacterium tuberculosis]	184	live	1773	2018-04-25	2018-04-25		Mycobacterium tuberculosis	Bacteria	1	NZ_PYPV01000136.1:153-707	NZ_PYPV01000136.1	Mycobacterium tuberculosis strain AUH8 NODE_143_length_2016_cov_0.577554, whole genome shotgun sequence	2016	L1PBa_5end	nr	bacteria	|-__root|-__cellular_organisms|k__Bacteria|-__Terrabacteria_group|p__Actinobacteria|c__Actinobacteria|o__Corynebacteriales|f__Mycobacteriaceae|g__Mycobacterium|-__Mycobacterium_tuberculosis_complex|s__Mycobacterium_tuberculosis
NZ_BECC01000060.1:359-1164	gi|833494892|ref|XP_012770489.1|	99.55	221	1	0	1	663	104	324	6e-121	441.8	XP_012770489.1	hypothetical protein, conserved [Babesia bigemina]	331	live	5866	2015-06-16	2015-06-16		Babesia bigemina	Eukaryota	3	NW_012237094.1:721-1788,XM_012915035.1:1-996,LK054995.1:721-1788	NW_012237094.1	Babesia bigemina genome assembly Bbig001, scaffold Bbigscaff_63221	2011	L1HS_3end	nr	bacteria	|-__root|-__cellular_organisms|k__Eukaryota|-__Alveolata|p__Apicomplexa|c__Aconoidasida|-__Piroplasmida|f__Babesiidae|g__Babesia|s__Babesia_bigemina
NZ_PZRW01000021.1:427-778	gi|1407127395|ref|WP_111058740.1|	100	40	0	0	233	352	1	40	1e-16	94	WP_111058740.1	hypothetical protein [Staphylococcus aureus]	80	live	1280	2018-06-20	2018-06-20		Staphylococcus aureus	Bacteria	2	NZ_PZRW01000021.1:659-901,PZRW01000021.1:659-901	NZ_PZRW01000021.1	Staphylococcus aureus strain CM148 PROKKA_contig000024, whole genome shotgun sequence	2004	MSTB	nr	bacteria	|-__root|-__cellular_organisms|k__Bacteria|-__Terrabacteria_group|p__Firmicutes|c__Bacilli|o__Bacillales|f__Staphylococcaceae|g__Staphylococcus|s__Staphylococcus_aureus
NZ_LPSC01000025.1:922-1159	gi|912654306|ref|WP_050218434.1|	100	52	0	0	1	156	23	74	6e-25	120.9	WP_050218434.1	hypothetical protein [Streptococcus pneumoniae]	74	live	1313	2015-08-05	2015-08-05		Streptococcus pneumoniae	Bacteria	4	NZ_CMHF01000064.1:1716-1940,CKYY01000046.1:79-303,CLCE01000593.1:660-884,CMHF01000064.1:1716-1940	NZ_CMHF01000064.1	Streptococcus pneumoniae strain SMRU2967, whole genome shotgun sequence	2000	HSATII	nr	archaea	|-__root|-__cellular_organisms|k__Bacteria|-__Terrabacteria_group|p__Firmicutes|c__Bacilli|o__Lactobacillales|f__Streptococcaceae|g__Streptococcus|s__Streptococcus_pneumoniae
NZ_FQLM01000003.1:4122-5041	gi|809289405|embl|CRH44461.1|	95.76	236	10	0	918	211	87	322	8e-124	451.8	CRH44461.1	L1 transposable element [Chlamydia trachomatis]	322	live	813	2015-04-21	2015-06-12		Chlamydia trachomatis	Bacteria	1	CVNL01000009.1:69-1037	CVNL01000009.1	Chlamydia trachomatis genome assembly 7396_3#14, scaffold ERS075189SCcontig000009, whole genome shotgun sequence	1997	L1PBa_5end	nr	bacteria	|-__root|-__cellular_organisms|k__Bacteria|-__PVC_group|p__Chlamydiae|c__Chlamydiia|o__Chlamydiales|f__Chlamydiaceae|-__Chlamydia/Chlamydophila_group|g__Chlamydia|s__Chlamydia_trachomatis
NZ_KI271244.1:1698-1891	gi|737485007|ref|WP_035464748.1|	100	64	0	0	193	2	1	74	6e-30	137.5	WP_035464748.1	hypothetical protein [Lactobacillus brevis]	77	live	1580	2014-12-23	2014-12-23		Lactobacillus brevis	Bacteria	1	NZ_KI271244.1:1687-1920	NZ_KI271244.1	Lactobacillus brevis ATCC 14869 = DSM 20054 strain ATCC 14869 Scaffold433, whole genome shotgun sequence	1988	HSATII	nr	bacteria	|-__root|-__cellular_organisms|k__Bacteria|-__Terrabacteria_group|p__Firmicutes|c__Bacilli|o__Lactobacillales|f__Lactobacillaceae|g__Lactobacillus|s__Lactobacillus_brevis
NZ_PYPV01000107.1:1455-1623	gi|913376257|ref|WP_050389106.1|	100	56	0	0	1	168	22	77	6e-25	120.9	WP_050389106.1	hypothetical protein [Streptococcus pneumoniae]	121	live	1313	2015-08-06	2015-08-06		Streptococcus pneumoniae	Bacteria	1	NZ_CMKS01000068.1:1547-1912	NZ_CMKS01000068.1	Streptococcus pneumoniae strain SMRU3030, whole genome shotgun sequence	1983	ALR	nr	bacteria	|-__root|-__cellular_organisms|k__Bacteria|-__Terrabacteria_group|p__Firmicutes|c__Bacilli|o__Lactobacillales|f__Streptococcaceae|g__Streptococcus|s__Streptococcus_pneumoniae
NZ_LZSE01000010.1:1742-5035	gi|954587100|gb|KRZ65217.1|	95.38	563	5	1	1606	3294	1	542	0	1079.3	KRZ65217.1	LINE-1 reverse transcriptase -like protein, partial [Trichinella papuae]	621	live	268474	2015-11-24	2015-11-24		Trichinella papuae	Eukaryota	1	JYDO01000450.1:43-1968	JYDO01000450.1	Trichinella papuae isolate ISS1980 scaffold454s, whole genome shotgun sequence	1979	L1P1_orf2	nr	bacteria	|-__root|-__cellular_organisms|k__Eukaryota|-__Opisthokonta|-__Metazoa|-__Eumetazoa|-__Bilateria|-__Protostomia|-__Ecdysozoa|p__Nematoda|c__Enoplea|-__Dorylaimia|o__Trichinellida|f__Trichinellidae|g__Trichinella|s__Trichinella_papuae
NZ_FVQV01000046.1:44-211	gi|912654311|ref|WP_050218439.1|	100	49	0	0	22	168	1	49	9e-19	100.5	WP_050218439.1	hypothetical protein [Streptococcus pneumoniae]	89	live	1313	2015-08-05	2015-08-05		Streptococcus pneumoniae	Bacteria	2	NZ_CMHF01000067.1:464-733,NZ_CMKS01000059.1:2070-2339	NZ_CMHF01000067.1	Streptococcus pneumoniae strain SMRU2967, whole genome shotgun sequence	1975	ALR	nr	bacteria	|-__root|-__cellular_organisms|k__Bacteria|-__Terrabacteria_group|p__Firmicutes|c__Bacilli|o__Lactobacillales|f__Streptococcaceae|g__Streptococcus|s__Streptococcus_pneumoniae
NZ_QKVY01000013.1:89-274	gi|657834360|ref|WP_029550483.1|	100	28	0	0	94	177	1	28	6e-09	67.8	WP_029550483.1	MULTISPECIES: hypothetical protein [Bacillales]	68	live	1385	2014-06-19	2017-01-21		Bacillales	Bacteria	4	NZ_JHDV01000034.1:274-480,NZ_JHDX01000030.1:491-697,NZ_MPTK01000063.1:834-1040,MPTK01000063.1:834-1040	NZ_JHDV01000034.1	Staphylococcus aureus SA3-LAU contig_34, whole genome shotgun sequence	1972	HSATII	nr	bacteria	|-__root|-__cellular_organisms|k__Bacteria|-__Terrabacteria_group|p__Firmicutes|c__Bacilli|o__Bacillales
NZ_JHDV01000034.1:1017-1234	gi|657834361|ref|WP_029550484.1|	100	52	0	0	1	156	23	74	6e-25	120.9	WP_029550484.1	MULTISPECIES: hypothetical protein [Bacillales]	74	live	1385	2014-06-19	2018-07-15		Bacillales	Bacteria	3	NZ_JHDV01000034.1:951-1175,NZ_QLYT01000108.1:961-1185,QLYT01000108.1:961-1185	NZ_JHDV01000034.1	Staphylococcus aureus SA3-LAU contig_34, whole genome shotgun sequence	1972	HSATII	nr	bacteria	|-__root|-__cellular_organisms|k__Bacteria|-__Terrabacteria_group|p__Firmicutes|c__Bacilli|o__Bacillales
NZ_LONH01000188.1:67-275	gi|657834362|ref|WP_029550485.1|	98.55	69	1	0	3	209	2	85	2e-30	139	WP_029550485.1	hypothetical protein [Staphylococcus aureus]	92	live	1280	2014-06-19	2014-06-19		Staphylococcus aureus	Bacteria	1	NZ_JHDV01000034.1:1151-1429	NZ_JHDV01000034.1	Staphylococcus aureus SA3-LAU contig_34, whole genome shotgun sequence	1972	HSATII	nr	bacteria	|-__root|-__cellular_organisms|k__Bacteria|-__Terrabacteria_group|p__Firmicutes|c__Bacilli|o__Bacillales|f__Staphylococcaceae|g__Staphylococcus|s__Staphylococcus_aureus
NZ_FPIL01000018.1:1061-1512	gi|1190714786|embl|SFW04283.1|	100	28	0	0	452	369	64	91	7e-08	64.7	SFW04283.1	Uncharacterised protein [Chlamydia abortus]	91	live	83555	2017-05-10	2017-05-10		Chlamydia abortus	Bacteria	1	FPIL01000018.1:1426-1701	FPIL01000018.1	Chlamydophila abortus strain POS genome assembly, contig: ERS003306SCcontig000018, whole genome shotgun sequence	1966	L1HS_3end	nr	bacteria	|-__root|-__cellular_organisms|k__Bacteria|-__PVC_group|p__Chlamydiae|c__Chlamydiia|o__Chlamydiales|f__Chlamydiaceae|-__Chlamydia/Chlamydophila_group|g__Chlamydia|s__Chlamydia_abortus
NZ_FPIL01000018.1:1061-1512	gi|1197015212|ref|WP_086427307.1|	100	95	0	0	285	1	1	95	4e-48	198.4	WP_086427307.1	DUF3704 domain-containing protein [Chlamydia abortus]	134	live	83555	2017-05-24	2017-07-23		Chlamydia abortus	Bacteria	2	NZ_FPIL01000018.1:941-1345,FPIL01000018.1:941-1345	NZ_FPIL01000018.1	Chlamydia abortus strain POS, whole genome shotgun sequence	1966	L1HS_3end	nr	bacteria	|-__root|-__cellular_organisms|k__Bacteria|-__PVC_group|p__Chlamydiae|c__Chlamydiia|o__Chlamydiales|f__Chlamydiaceae|-__Chlamydia/Chlamydophila_group|g__Chlamydia|s__Chlamydia_abortus
NZ_KE359982.1:162-331	gi|514655826|gb|EPJ12881.1|	97.73	44	1	0	154	23	1	44	7e-10	70.9	EPJ12881.1	hypothetical protein CP01DC11_1498 [Chlamydia psittaci 01DC11]	44	live	1112252	2013-06-25	2013-06-25		Chlamydia psittaci 01DC11	Bacteria	28	ATKP01000350.1:55-189,KE353545.1:55-189,ATKQ01000040.1:18-152,KE353603.1:18-152,ATKU01000021.1:325-459,KE355757.1:1115-1249,ATKT01000080.1:152-286,KE355562.1:727-861,ATKV01000025.1:8-142,KE355790.1:8-142,ATKY01000156.1:155-289,KE355959.1:155-289,ATKZ01000063.1:737-871,KE356011.1:737-871,ATKW01000076.1:206-340,KE355849.1:206-340,ATLD01000024.1:208-342,KE356200.1:208-342,ATMV01000021.1:36-170,KE359…	ATKP01000350.1	Chlamydia psittaci 01DC11 CP_01DC11.contig.391_1, whole genome shotgun sequence	1954	ALR	nr	bacteria	|-__root|-__cellular_organisms|k__Bacteria|-__PVC_group|p__Chlamydiae|c__Chlamydiia|o__Chlamydiales|f__Chlamydiaceae|-__Chlamydia/Chlamydophila_group|g__Chlamydia|s__Chlamydia_psittaci|-__Chlamydia_psittaci_01DC11
NZ_KE359982.1:333-504	gi|514655827|gb|EPJ12882.1|	97.83	46	1	0	155	18	1	46	1e-18	99.8	EPJ12882.1	nef attachable domain protein [Chlamydia psittaci 01DC11]	46	live	1112252	2013-06-25	2013-06-25		Chlamydia psittaci 01DC11	Bacteria	28	ATKP01000350.1:221-361,KE353545.1:221-361,ATKQ01000040.1:184-324,KE353603.1:184-324,ATKS01000032.1:131-271,KE353682.1:480-620,ATKU01000021.1:153-293,KE355757.1:943-1083,ATKT01000080.1:318-458,KE355562.1:893-1033,ATKZ01000063.1:903-1043,KE356011.1:903-1043,ATKW01000076.1:372-512,KE355849.1:372-512,ATLA01000063.1:171-311,KE356141.1:2198-2338,ATLD01000024.1:374-514,KE356200.1:374-514,ATLC01000008.1:…	ATKP01000350.1	Chlamydia psittaci 01DC11 CP_01DC11.contig.391_1, whole genome shotgun sequence	1954	ALR	nr	bacteria	|-__root|-__cellular_organisms|k__Bacteria|-__PVC_group|p__Chlamydiae|c__Chlamydiia|o__Chlamydiales|f__Chlamydiaceae|-__Chlamydia/Chlamydophila_group|g__Chlamydia|s__Chlamydia_psittaci|-__Chlamydia_psittaci_01DC11
NZ_KE359684.1:752-923	gi|514655831|gb|EPJ12886.1|	100	40	0	0	172	53	11	50	2e-14	86.3	EPJ12886.1	nef attachable domain protein, partial [Chlamydia psittaci 01DC11]	50	live	1112252	2013-06-25	2013-06-25		Chlamydia psittaci 01DC11	Bacteria	2	ATKP01000350.1:1800-1954,KE353545.1:1800-1954	ATKP01000350.1	Chlamydia psittaci 01DC11 CP_01DC11.contig.391_1, whole genome shotgun sequence	1954	ALR	nr	bacteria	|-__root|-__cellular_organisms|k__Bacteria|-__PVC_group|p__Chlamydiae|c__Chlamydiia|o__Chlamydiales|f__Chlamydiaceae|-__Chlamydia/Chlamydophila_group|g__Chlamydia|s__Chlamydia_psittaci|-__Chlamydia_psittaci_01DC11
NZ_MTHY01000274.1:1-813	gi|1148640987|ref|WP_077385514.1|	96.51	86	3	0	400	143	1	86	2e-39	171	WP_077385514.1	hypothetical protein [Mycobacterium tuberculosis]	86	live	1773	2017-02-20	2017-02-20		Mycobacterium tuberculosis	Bacteria	1	NZ_FUFS01000241.1:1155-1415	NZ_FUFS01000241.1	Mycobacterium tuberculosis isolate MTB20_M, whole genome shotgun sequence	1950	L1HS_5end	nr	bacteria	|-__root|-__cellular_organisms|k__Bacteria|-__Terrabacteria_group|p__Actinobacteria|c__Actinobacteria|o__Corynebacteriales|f__Mycobacteriaceae|g__Mycobacterium|-__Mycobacterium_tuberculosis_complex|s__Mycobacterium_tuberculosis
NZ_FSLH01000024.1:1206-1373	gi|1117501736|embl|SIH60289.1|	100	56	0	0	1	168	2	57	6e-23	114.4	SIH60289.1	Uncharacterised protein [Mycobacteroides abscessus subsp. abscessus]	60	live	1185650	2016-12-14	2016-12-14		Mycobacteroides abscessus subsp. abscessus	Bacteria	1	FSLH01000024.1:1203-1385	FSLH01000024.1	Mycobacterium abscessus subsp. abscessus strain 1082 genome assembly, contig: ERS383203SCcontig000024, whole genome shotgun sequence	1941	ALR	nr	bacteria	|-__root|-__cellular_organisms|k__Bacteria|-__Terrabacteria_group|p__Actinobacteria|c__Actinobacteria|o__Corynebacteriales|f__Mycobacteriaceae|g__Mycobacteroides|s__Mycobacteroides_abscessus|-__Mycobacteroides_abscessus_subsp._abscessus
NZ_FTZV01000346.1:433-600	gi|1143202218|ref|WP_077128860.1|	100	56	0	0	1	168	2	57	1e-22	113.2	WP_077128860.1	hypothetical protein [Shigella sonnei]	60	suppressed	624	2017-02-08	2017-02-08	This protein record was suppressed because it is no longer annotated on any genome	Mycobacteroides abscessus subsp. abscessus	Bacteria	1	FSLH01000024.1:1543-1725	FSLH01000024.1	Mycobacterium abscessus subsp. abscessus strain 1082 genome assembly, contig: ERS383203SCcontig000024, whole genome shotgun sequence	1941	ALR	nr	bacteria	|-__root|-__cellular_organisms|k__Bacteria|p__Proteobacteria|c__Gammaproteobacteria|o__Enterobacterales|f__Enterobacteriaceae|g__Shigella|s__Shigella_sonnei
NZ_QLYV01000053.1:599-818	gi|1117501732|embl|SIH60795.1|	98.55	69	1	0	11	217	1	69	2e-32	145.6	SIH60795.1	Uncharacterised protein [Mycobacteroides abscessus subsp. abscessus]	69	live	1185650	2016-12-14	2016-12-14		Mycobacteroides abscessus subsp. abscessus	Bacteria	1	FSLH01000025.1:1550-1759	FSLH01000025.1	Mycobacterium abscessus subsp. abscessus strain 1082 genome assembly, contig: ERS383203SCcontig000025, whole genome shotgun sequence	1931	HSATII	nr	bacteria	|-__root|-__cellular_organisms|k__Bacteria|-__Terrabacteria_group|p__Actinobacteria|c__Actinobacteria|o__Corynebacteriales|f__Mycobacteriaceae|g__Mycobacteroides|s__Mycobacteroides_abscessus|-__Mycobacteroides_abscessus_subsp._abscessus
NZ_KL476634.1:341-537	gi|1123841987|ref|WP_074379949.1|	100	60	0	0	16	195	1	60	6e-31	141	WP_074379949.1	MULTISPECIES: hypothetical protein [Terrabacteria group]	60	live	1783272	2016-12-22	2018-07-15		Terrabacteria group	Bacteria	3	NZ_FSLH01000025.1:257-439,NZ_QLYT01000108.1:1182-1364,QLYT01000108.1:1182-1364	NZ_FSLH01000025.1	Mycobacteroides abscessus subsp. abscessus strain 1082, whole genome shotgun sequence	1931	HSATII	nr	bacteria	|-__root|-__cellular_organisms|k__Bacteria|-__Terrabacteria_group
NZ_LMSY01000016.1:1113-1312	gi|620707522|gb|KAK66786.1|	98.31	59	1	0	24	200	1	59	8e-25	120.6	KAK66786.1	hypothetical protein AZ22_5150 [Bordetella bronchiseptica 980-2]	64	live	1458264	2014-04-29	2014-06-30		Bordetella bronchiseptica 980-2	Bacteria	1	JHOK01000022.1:1515-1709	JHOK01000022.1	Bordetella bronchiseptica 980-2 ctg7180000048741, whole genome shotgun sequence	1931	HSATII	nr	bacteria	|-__root|-__cellular_organisms|k__Bacteria|p__Proteobacteria|c__Betaproteobacteria|o__Burkholderiales|f__Alcaligenaceae|g__Bordetella|s__Bordetella_bronchiseptica|-__Bordetella_bronchiseptica_980-2
NZ_JHOK01000022.1:66-257	gi|620707524|gb|KAK66788.1|	100	58	0	0	3	176	7	64	6e-33	147.5	KAK66788.1	hypothetical protein AZ22_5147 [Bordetella bronchiseptica 980-2]	64	live	1458264	2014-04-29	2014-06-30		Bordetella bronchiseptica 980-2	Bacteria	1	JHOK01000022.1:50-244	JHOK01000022.1	Bordetella bronchiseptica 980-2 ctg7180000048741, whole genome shotgun sequence	1931	HSATII	nr	bacteria	|-__root|-__cellular_organisms|k__Bacteria|p__Proteobacteria|c__Betaproteobacteria|o__Burkholderiales|f__Alcaligenaceae|g__Bordetella|s__Bordetella_bronchiseptica|-__Bordetella_bronchiseptica_980-2
NZ_QLYT01000108.1:81-281	gi|620707525|gb|KAK66789.1|	100	44	0	0	67	198	1	44	6e-18	97.8	KAK66789.1	hypothetical protein AZ22_5149 [Bordetella bronchiseptica 980-2]	44	live	1458264	2014-04-29	2014-06-30		Bordetella bronchiseptica 980-2	Bacteria	2	JHOK01000022.1:785-919,MKGI01000006.1:68-202	JHOK01000022.1	Bordetella bronchiseptica 980-2 ctg7180000048741, whole genome shotgun sequence	1931	HSATII	nr	bacteria	|-__root|-__cellular_organisms|k__Bacteria|p__Proteobacteria|c__Betaproteobacteria|o__Burkholderiales|f__Alcaligenaceae|g__Bordetella|s__Bordetella_bronchiseptica|-__Bordetella_bronchiseptica_980-2
NZ_JHOK01000022.1:1794-1931	gi|620707526|gb|KAK66790.1|	100	45	0	0	3	137	10	69	6e-17	94.4	KAK66790.1	hypothetical protein AZ22_5152, partial [Bordetella bronchiseptica 980-2]	69	live	1458264	2014-04-29	2014-06-30		Bordetella bronchiseptica 980-2	Bacteria	1	JHOK01000022.1:1724-1931	JHOK01000022.1	Bordetella bronchiseptica 980-2 ctg7180000048741, whole genome shotgun sequence	1931	HSATII	nr	bacteria	|-__root|-__cellular_organisms|k__Bacteria|p__Proteobacteria|c__Betaproteobacteria|o__Burkholderiales|f__Alcaligenaceae|g__Bordetella|s__Bordetella_bronchiseptica|-__Bordetella_bronchiseptica_980-2
NZ_QLYV01000053.1:599-818	gi|657834364|ref|WP_029550487.1|	100	69	0	0	11	217	1	69	8e-33	147.1	WP_029550487.1	MULTISPECIES: hypothetical protein [Bacteria][Archaea]	69	live	2	2014-06-19	2017-05-06		Bacteria	Bacteria	17	NZ_CGZQ01000070.1:416-625,NZ_CKYY01000046.1:1193-1402,NZ_CMHC01000042.1:1286-1495,NZ_CMHF01000064.1:617-826,NZ_JHDV01000034.1:1651-1860,NZ_LONH01000140.1:195-404,NZ_LPSC01000025.1:1551-1760,NZ_MPTK01000063.1:413-622,NZ_NRUA01000095.1:649-858,CKYY01000046.1:1193-1402,CLCE01000593.1:15-224,CGZQ01000070.1:416-625,CMHC01000042.1:1286-1495,CMHF01000064.1:617-826,CIEA01000119.1:274-483,LONH01000140.1:1…	NZ_CGZQ01000070.1	Streptococcus pneumoniae strain SMRU2282, whole genome shotgun sequence	1930	HSATII	nr	bacteria	|-__root|-__cellular_organisms|k__Bacteria
NZ_LYPH01000008.1:1269-1459	gi|657834536|ref|WP_029550592.1|	98.39	62	1	0	186	1	1	62	6e-33	147.5	WP_029550592.1	MULTISPECIES: hypothetical protein [Bacteria]	62	live	2	2014-06-19	2017-02-09		Bacteria	Bacteria	9	NZ_CGZQ01000070.1:682-870,NZ_CKYY01000046.1:1459-1647,NZ_CMHF01000064.1:372-560,NZ_CZJV02000016.1:669-857,NZ_FTZV01000320.1:1663-1851,NZ_NWDR01000087.1:1344-1532,CGZQ01000070.1:682-870,CRZK01001032.1:110-298,FSLH01000025.1:7-195	NZ_CGZQ01000070.1	Streptococcus pneumoniae strain SMRU2282, whole genome shotgun sequence	1930	HSATII	nr	bacteria	|-__root|-__cellular_organisms|k__Bacteria
NZ_QKVY01000013.1:89-274	gi|809852495|embl|CJS64110.1|	100	31	0	0	94	186	1	31	9e-11	73.9	CJS64110.1	Uncharacterised protein [Streptococcus pneumoniae]	38	live	1313	2015-04-21	2015-06-14		Streptococcus pneumoniae	Bacteria	1	CGZQ01000070.1:88-204	CGZQ01000070.1	Streptococcus pneumoniae genome assembly 6983_4#74, scaffold ERS021791SCcontig000070, whole genome shotgun sequence	1930	HSATII	nr	bacteria	|-__root|-__cellular_organisms|k__Bacteria|-__Terrabacteria_group|p__Firmicutes|c__Bacilli|o__Lactobacillales|f__Streptococcaceae|g__Streptococcus|s__Streptococcus_pneumoniae
NZ_KL476634.1:99-298	gi|809852499|embl|CJS64246.1|	100	28	0	0	115	198	1	28	9e-11	73.9	CJS64246.1	Uncharacterised protein [Streptococcus pneumoniae]	29	live	1313	2015-04-21	2015-06-14		Streptococcus pneumoniae	Bacteria	4	CGZQ01000070.1:886-975,CQSC01000360.1:192-281,FSLH01000025.1:211-300,FTZV01000320.1:1558-1647	CGZQ01000070.1	Streptococcus pneumoniae genome assembly 6983_4#74, scaffold ERS021791SCcontig000070, whole genome shotgun sequence	1930	HSATII	nr	bacteria	|-__root|-__cellular_organisms|k__Bacteria|-__Terrabacteria_group|p__Firmicutes|c__Bacilli|o__Lactobacillales|f__Streptococcaceae|g__Streptococcus|s__Streptococcus_pneumoniae
NZ_KL476634.1:341-537	gi|809852500|embl|CJS64276.1|	100	65	0	0	1	195	3	82	6e-30	137.5	CJS64276.1	Uncharacterised protein [Streptococcus pneumoniae]	82	live	1313	2015-04-21	2015-06-14		Pseudomonas sp. MDMC216	Bacteria	4	CGZQ01000070.1:932-1180,NZ_QLYV01000053.1:69-317,NDZR01000765.1:1116-1364,QLYV01000053.1:69-317	CGZQ01000070.1	Streptococcus pneumoniae genome assembly 6983_4#74, scaffold ERS021791SCcontig000070, whole genome shotgun sequence	1930	HSATII	nr	bacteria	|-__root|-__cellular_organisms|k__Bacteria|-__Terrabacteria_group|p__Firmicutes|c__Bacilli|o__Lactobacillales|f__Streptococcaceae|g__Streptococcus|s__Streptococcus_pneumoniae
NZ_KL476634.1:341-537	gi|951098021|ref|WP_057589226.1|	100	65	0	0	1	195	13	92	6e-30	137.5	WP_057589226.1	MULTISPECIES: hypothetical protein [Bacteria]	92	live	2	2015-11-10	2018-07-15		Bacteria	Bacteria	3	NZ_CGZQ01000070.1:932-1210,NZ_NRUA01000095.1:84-362,FSLH01000025.1:257-535	NZ_CGZQ01000070.1	Streptococcus pneumoniae strain SMRU2282, whole genome shotgun sequence	1930	HSATII	nr	bacteria	|-__root|-__cellular_organisms|k__Bacteria
NZ_MPRK01000332.1:310-539	gi|1407127398|ref|WP_111058743.1|	100	76	0	0	230	3	24	99	2e-41	175.6	WP_111058743.1	hypothetical protein [Staphylococcus aureus]	132	live	1280	2018-06-20	2018-06-20		Staphylococcus aureus	Bacteria	2	NZ_PZRW01000022.1:1173-1571,PZRW01000022.1:1173-1571	NZ_PZRW01000022.1	Staphylococcus aureus strain CM148 PROKKA_contig000026, whole genome shotgun sequence	1910	HSATII	nr	bacteria	|-__root|-__cellular_organisms|k__Bacteria|-__Terrabacteria_group|p__Firmicutes|c__Bacilli|o__Bacillales|f__Staphylococcaceae|g__Staphylococcus|s__Staphylococcus_aureus
NZ_NRVA01000082.1:951-1171	gi|685901692|ref|WP_031642148.1|	100	69	0	0	211	5	1	69	6e-33	147.5	WP_031642148.1	MULTISPECIES: hypothetical protein [Bacteria]	69	live	2	2014-09-19	2018-07-15		Bacteria	Bacteria	12	NZ_JPAY01000012.1:295-504,NZ_KI270986.1:95-304,NZ_LXFS01000073.1:98-307,NZ_NRUT01000115.1:119-328,NZ_NRVA01000082.1:952-1161,NZ_PZRW01000022.1:74-283,EP972392.1:196-405,AWVI01000090.1:95-304,KI270986.1:95-304,JPAY01000012.1:295-504,LXFS01000073.1:98-307,PZRW01000022.1:74-283	NZ_JPAY01000012.1	Listeria monocytogenes strain FSL R8-7097 contig000013, whole genome shotgun sequence	1902	HSATII	nr	bacteria	|-__root|-__cellular_organisms|k__Bacteria
NZ_KL476634.1:341-537	gi|685901693|ref|WP_031642149.1|	100	64	0	0	4	195	4	72	2e-31	142.9	WP_031642149.1	hypothetical protein [Listeria monocytogenes]	72	live	1639	2014-09-19	2014-09-19		Listeria monocytogenes	Bacteria	2	NZ_JPAY01000012.1:796-1014,JPAY01000012.1:796-1014	NZ_JPAY01000012.1	Listeria monocytogenes strain FSL R8-7097 contig000013, whole genome shotgun sequence	1902	HSATII	nr	bacteria	|-__root|-__cellular_organisms|k__Bacteria|-__Terrabacteria_group|p__Firmicutes|c__Bacilli|o__Bacillales|f__Listeriaceae|g__Listeria|s__Listeria_monocytogenes
NZ_LQPU01000030.1:415-1039	gi|1273403291|gb|PIB45158.1|	99.15	118	1	0	207	560	1	118	2e-68	266.5	PIB45158.1	hypothetical protein AOA57_23895, partial [Pseudomonas sp. 2588-5]	118	live	1712676	2017-11-02	2017-11-02		Pseudomonas sp. 2588-5	Bacteria	1	LJRX01000508.1:1-355	LJRX01000508.1	Pseudomonas sp. 2588-5 contig_680, whole genome shotgun sequence	1887	L1HS_3end	nr	bacteria	|-__root|-__cellular_organisms|k__Bacteria|p__Proteobacteria|c__Gammaproteobacteria|o__Pseudomonadales|f__Pseudomonadaceae|g__Pseudomonas|s__Pseudomonas_sp._2588-5
NZ_PIZR01000037.1:6-176	gi|1037155718|embl|SBT57124.1|	100	36	0	0	63	170	1	36	5e-13	81.3	SBT57124.1	hypothetical protein POVWA2_077480 [Plasmodium ovale wallikeri]	112	live	864142	2016-06-16	2016-06-16		Plasmodium ovale wallikeri	Eukaryota	1	FLRE01001749.1:1-339	FLRE01001749.1	Plasmodium ovale wallikeri genome assembly, contig: contig1749, whole genome shotgun sequence	1878	ALR	nr	bacteria	|-__root|-__cellular_organisms|k__Eukaryota|-__Alveolata|p__Apicomplexa|c__Aconoidasida|o__Haemosporida|f__Plasmodiidae|g__Plasmodium|-__Plasmodium_(Plasmodium)|s__Plasmodium_ovale|-__Plasmodium_ovale_wallikeri
NZ_NARI01000200.1:37-203	gi|1037155719|embl|SBT57125.1|	100	41	0	0	165	43	38	78	8e-15	87.4	SBT57125.1	hypothetical protein POVWA2_077490 [Plasmodium ovale wallikeri]	109	live	864142	2016-06-16	2016-06-16		Plasmodium ovale wallikeri	Eukaryota	1	FLRE01001749.1:438-1014	FLRE01001749.1	Plasmodium ovale wallikeri genome assembly, contig: contig1749, whole genome shotgun sequence	1878	ALR	nr	bacteria	|-__root|-__cellular_organisms|k__Eukaryota|-__Alveolata|p__Apicomplexa|c__Aconoidasida|o__Haemosporida|f__Plasmodiidae|g__Plasmodium|-__Plasmodium_(Plasmodium)|s__Plasmodium_ovale|-__Plasmodium_ovale_wallikeri
NZ_APIB01000016.1:1-1739	gi|733112831|gb|KHK05566.1|	100	348	0	0	235	1278	1	348	2e-203	718	KHK05566.1	groupII intron-encoded protein [Listeria monocytogenes SHL001]	348	live	1302622	2014-12-15	2014-12-15		Listeria monocytogenes SHL001	Bacteria	1	APIB01000016.1:235-1281	APIB01000016.1	Listeria monocytogenes SHL001 contig16, whole genome shotgun sequence	1860	L1P1_orf2	nr	bacteria	|-__root|-__cellular_organisms|k__Bacteria|-__Terrabacteria_group|p__Firmicutes|c__Bacilli|o__Bacillales|f__Listeriaceae|g__Listeria|s__Listeria_monocytogenes|-__Listeria_monocytogenes_SHL001
NZ_APIB01000016.1:1-1739	gi|733112832|gb|KHK05567.1|	100	85	0	0	1278	1532	1	85	1e-39	173.7	KHK05567.1	hypothetical protein I793_14746 [Listeria monocytogenes SHL001]	85	live	1302622	2014-12-15	2014-12-15		Listeria monocytogenes SHL001	Bacteria	1	APIB01000016.1:1278-1535	APIB01000016.1	Listeria monocytogenes SHL001 contig16, whole genome shotgun sequence	1860	L1P1_orf2	nr	bacteria	|-__root|-__cellular_organisms|k__Bacteria|-__Terrabacteria_group|p__Firmicutes|c__Bacilli|o__Bacillales|f__Listeriaceae|g__Listeria|s__Listeria_monocytogenes|-__Listeria_monocytogenes_SHL001
NZ_FVQV01000023.1:1-169	gi|881214924|embl|CJE29124.1|	100	56	0	0	1	168	11	66	6e-25	120.9	CJE29124.1	Uncharacterised protein [Streptococcus pneumoniae]	127	live	1313	2015-03-21	2015-06-13		Streptococcus pneumoniae	Bacteria	1	CKYY01000051.1:205-588	CKYY01000051.1	Streptococcus pneumoniae genome assembly 6840_1#21, scaffold ERS021283SCcontig000051, whole genome shotgun sequence	1850	HSATII	nr	bacteria	|-__root|-__cellular_organisms|k__Bacteria|-__Terrabacteria_group|p__Firmicutes|c__Bacilli|o__Lactobacillales|f__Streptococcaceae|g__Streptococcus|s__Streptococcus_pneumoniae
NZ_QDDX01000120.1:694-853	gi|881214925|embl|CJE29143.1|	100	53	0	0	160	2	1	53	4e-23	114.8	CJE29143.1	Uncharacterised protein [Streptococcus pneumoniae]	56	live	1313	2015-03-21	2015-06-13		Streptococcus pneumoniae	Bacteria	3	CKYY01000051.1:542-712,CQTE01000349.1:66-236,CREL01000060.1:863-1033	CKYY01000051.1	Streptococcus pneumoniae genome assembly 6840_1#21, scaffold ERS021283SCcontig000051, whole genome shotgun sequence	1850	HSATII	nr	bacteria	|-__root|-__cellular_organisms|k__Bacteria|-__Terrabacteria_group|p__Firmicutes|c__Bacilli|o__Lactobacillales|f__Streptococcaceae|g__Streptococcus|s__Streptococcus_pneumoniae
NZ_QNUV01000083.1:183-344	gi|912673048|ref|WP_050226864.1|	98.11	53	1	0	161	3	45	97	7e-24	117.5	WP_050226864.1	hypothetical protein, partial [Streptococcus pneumoniae]	112	live	1313	2015-08-05	2015-08-05		Streptococcus pneumoniae	Bacteria	1	NZ_CKYY01000051.1:1513-1850	NZ_CKYY01000051.1	Streptococcus pneumoniae strain SMRU1773, whole genome shotgun sequence	1850	HSATII	nr	bacteria	|-__root|-__cellular_organisms|k__Bacteria|-__Terrabacteria_group|p__Firmicutes|c__Bacilli|o__Lactobacillales|f__Streptococcaceae|g__Streptococcus|s__Streptococcus_pneumoniae
NZ_FVQV01000023.1:1-169	gi|912807344|ref|WP_050277357.1|	100	56	0	0	1	168	11	66	6e-25	120.9	WP_050277357.1	MULTISPECIES: hypothetical protein, partial [Bacteria]	112	live	2	2015-08-06	2018-07-15		Bacteria	Bacteria	4	NZ_CMHC01000043.1:1-338,NZ_NRUA01000136.1:1070-1407,NZ_QOLE01000010.1:25-362,QOLE01000010.1:25-362	NZ_CMHC01000043.1	Streptococcus pneumoniae strain SMRU2972, whole genome shotgun sequence	1850	HSATII	nr	bacteria	|-__root|-__cellular_organisms|k__Bacteria
NZ_QNUV01000083.1:183-344	gi|912807345|ref|WP_050277358.1|	100	53	0	0	161	3	45	97	3e-24	118.6	WP_050277358.1	hypothetical protein [Streptococcus pneumoniae]	127	live	1313	2015-08-06	2015-08-06		Streptococcus pneumoniae	Bacteria	1	NZ_CMHC01000043.1:423-806	NZ_CMHC01000043.1	Streptococcus pneumoniae strain SMRU2972, whole genome shotgun sequence	1850	HSATII	nr	bacteria	|-__root|-__cellular_organisms|k__Bacteria|-__Terrabacteria_group|p__Firmicutes|c__Bacilli|o__Lactobacillales|f__Streptococcaceae|g__Streptococcus|s__Streptococcus_pneumoniae
NZ_CMHC01000048.1:860-1030	gi|912807346|ref|WP_050277359.1|	100	57	0	0	171	1	15	71	2e-23	115.9	WP_050277359.1	hypothetical protein [Streptococcus pneumoniae]	105	live	1313	2015-08-06	2015-08-06		Streptococcus pneumoniae	Bacteria	1	NZ_CMHC01000048.1:755-1072	NZ_CMHC01000048.1	Streptococcus pneumoniae strain SMRU2972, whole genome shotgun sequence	1843	ALR	nr	bacteria	|-__root|-__cellular_organisms|k__Bacteria|-__Terrabacteria_group|p__Firmicutes|c__Bacilli|o__Lactobacillales|f__Streptococcaceae|g__Streptococcus|s__Streptococcus_pneumoniae
NZ_CZJV02000231.1:1-1694	gi|1205110851|ref|WP_087816381.1|	99.24	132	1	0	1558	1163	1	132	2e-70	276.2	WP_087816381.1	hypothetical protein [Psychrobacter cibarius]	135	live	282669	2017-06-12	2017-06-12		Psychrobacter cibarius	Bacteria	1	NZ_CZJV02000231.1:1151-1558	NZ_CZJV02000231.1	Psychrobacter cibarius strain W1 isolate Psychrobacter cibarius, whole genome shotgun sequence	1833	L1HS_5end	nr	bacteria	|-__root|-__cellular_organisms|k__Bacteria|p__Proteobacteria|c__Gammaproteobacteria|o__Pseudomonadales|f__Moraxellaceae|g__Psychrobacter|s__Psychrobacter_cibarius
NZ_MSLT01000005.1:661-1818	gi|1197239947|ref|WP_086486801.1|	100	295	0	0	1035	151	1	295	4e-174	619.4	WP_086486801.1	hypothetical protein [Thioflexothrix psekupsii]	295	live	1570016	2017-05-24	2017-05-24		Thioflexothrix psekupsii	Bacteria	2	NZ_MSLT01000005.1:808-1695,MSLT01000005.1:808-1695	NZ_MSLT01000005.1	Thioflexothrix psekupsii strain D3 unitig_16, whole genome shotgun sequence	1818	L1P1_orf2	nr	bacteria	|-__root|-__cellular_organisms|k__Bacteria|p__Proteobacteria|c__Gammaproteobacteria|o__Thiotrichales|-__unclassified_Thiotrichales|g__Thioflexothrix|s__Thioflexothrix_psekupsii
NZ_FRWP01000042.1:1-645	gi|1035717373|ref|WP_064556940.1|	97	200	6	0	7	606	1	200	2e-115	422.9	WP_064556940.1	DUF1725 domain-containing protein [Escherichia coli]	200	live	562	2016-06-10	2017-07-08		Escherichia coli	Bacteria	1	NZ_LWUK01000076.1:1144-1746	NZ_LWUK01000076.1	Escherichia coli strain 009PP2015 NODE_79_length_1806_cov_1.10193_ID_5111, whole genome shotgun sequence	1806	L1HS_3end	nr	bacteria	|-__root|-__cellular_organisms|k__Bacteria|p__Proteobacteria|c__Gammaproteobacteria|o__Enterobacterales|f__Enterobacteriaceae|g__Escherichia|s__Escherichia_coli
NZ_CKGI01000047.1:371-541	gi|1037157443|embl|SBT55282.1|	100	52	0	0	1	156	81	132	5e-21	107.8	SBT55282.1	hypothetical protein POVWA2_067200 [Plasmodium ovale wallikeri]	132	live	864142	2016-06-16	2016-06-16		Plasmodium ovale wallikeri	Eukaryota	1	FLRE01000773.1:224-1792	FLRE01000773.1	Plasmodium ovale wallikeri genome assembly, contig: contig773, whole genome shotgun sequence	1805	ALR	nr	bacteria	|-__root|-__cellular_organisms|k__Eukaryota|-__Alveolata|p__Apicomplexa|c__Aconoidasida|o__Haemosporida|f__Plasmodiidae|g__Plasmodium|-__Plasmodium_(Plasmodium)|s__Plasmodium_ovale|-__Plasmodium_ovale_wallikeri
NZ_LPSC01000025.1:922-1159	gi|883363273|embl|CJZ84892.1|	100	79	0	0	1	237	23	101	8e-44	183.7	CJZ84892.1	Uncharacterised protein [Streptococcus pneumoniae]	106	live	1313	2015-03-23	2015-06-13		Streptococcus pneumoniae	Bacteria	1	CMHC01000042.1:76-396	CMHC01000042.1	Streptococcus pneumoniae genome assembly 7038_5#20, scaffold ERS022482SCcontig000042, whole genome shotgun sequence	1800	HSATII	nr	archaea	|-__root|-__cellular_organisms|k__Bacteria|-__Terrabacteria_group|p__Firmicutes|c__Bacilli|o__Lactobacillales|f__Streptococcaceae|g__Streptococcus|s__Streptococcus_pneumoniae
NZ_NTTD01000152.1:1-204	gi|883363280|embl|CJZ85071.1|	100	35	0	0	3	107	3	37	3e-12	79	CJZ85071.1	Uncharacterised protein [Streptococcus pneumoniae]	37	live	1313	2015-03-23	2015-06-13		Streptococcus pneumoniae	Bacteria	2	CMHC01000042.1:1657-1770,CMIB01000066.1:332-445	CMHC01000042.1	Streptococcus pneumoniae genome assembly 7038_5#20, scaffold ERS022482SCcontig000042, whole genome shotgun sequence	1800	HSATII	nr	bacteria	|-__root|-__cellular_organisms|k__Bacteria|-__Terrabacteria_group|p__Firmicutes|c__Bacilli|o__Lactobacillales|f__Streptococcaceae|g__Streptococcus|s__Streptococcus_pneumoniae
NZ_PYQD01000170.1:173-335	gi|878611912|embl|CIQ13719.1|	100	53	0	0	161	3	16	68	2e-24	119	CIQ13719.1	Uncharacterised protein [Streptococcus pneumoniae]	98	live	1313	2015-03-21	2015-06-13		Streptococcus pneumoniae	Bacteria	1	CKCF01000050.1:1275-1571	CKCF01000050.1	Streptococcus pneumoniae genome assembly 6593_4#19, scaffold ERS019273SCcontig000050, whole genome shotgun sequence	1792	HSATII	nr	bacteria	|-__root|-__cellular_organisms|k__Bacteria|-__Terrabacteria_group|p__Firmicutes|c__Bacilli|o__Lactobacillales|f__Streptococcaceae|g__Streptococcus|s__Streptococcus_pneumoniae
NZ_QLYU01000051.1:262-434	gi|912673046|ref|WP_050226862.1|	100	56	0	0	5	172	1	56	2e-26	125.6	WP_050226862.1	MULTISPECIES: hypothetical protein [Terrabacteria group]	81	live	1783272	2015-08-05	2016-12-28		Terrabacteria group	Bacteria	18	NZ_CKCF01000050.1:241-486,NZ_CKYY01000051.1:709-954,NZ_CMHC01000043.1:1365-1610,NZ_CMIB01000047.1:822-1067,NZ_CRTU01000070.1:127-372,NZ_CYVE01000021.1:164-409,NZ_FSLH01000039.1:551-796,CGDU01000361.1:666-911,CKCF01000050.1:241-486,CKYY01000051.1:709-954,CLCE01000811.1:621-866,CMHC01000043.1:1365-1610,CMIB01000047.1:822-1067,CRTU01000070.1:127-372,CRZK01000831.1:620-865,JHOK01000044.1:1736-1981,MT…	NZ_CKCF01000050.1	Streptococcus pneumoniae strain 35F, whole genome shotgun sequence	1792	HSATII	nr	bacteria	|-__root|-__cellular_organisms|k__Bacteria|-__Terrabacteria_group
NZ_FWYR01000098.1:64-261	gi|1011237724|ref|WP_062156836.1|	100	30	0	0	198	109	71	100	2e-08	66.2	WP_062156836.1	hypothetical protein [Sulfolobus acidocaldarius]	100	live	2285	2016-03-28	2016-03-28		Sulfolobus acidocaldarius	Archaea	2	NZ_LPSC01000025.1:462-764,CWYK01000444.1:28-330	NZ_LPSC01000025.1	Sulfolobus acidocaldarius strain NG05B_C06_06 NG05B_C06_06_scaffold22, whole genome shotgun sequence	1774	HSATII	nr	bacteria	|-__root|-__cellular_organisms|k__Archaea|-__TACK_group|p__Crenarchaeota|c__Thermoprotei|o__Sulfolobales|f__Sulfolobaceae|g__Sulfolobus|s__Sulfolobus_acidocaldarius
NZ_LPSC01000025.1:922-1159	gi|1011237725|ref|WP_062156837.1|	100	79	0	0	1	237	28	106	8e-44	183.7	WP_062156837.1	hypothetical protein [Sulfolobus acidocaldarius]	111	live	2285	2016-03-28	2016-03-28		Sulfolobus acidocaldarius	Archaea	1	NZ_LPSC01000025.1:841-1176	NZ_LPSC01000025.1	Sulfolobus acidocaldarius strain NG05B_C06_06 NG05B_C06_06_scaffold22, whole genome shotgun sequence	1774	HSATII	nr	archaea	|-__root|-__cellular_organisms|k__Archaea|-__TACK_group|p__Crenarchaeota|c__Thermoprotei|o__Sulfolobales|f__Sulfolobaceae|g__Sulfolobus|s__Sulfolobus_acidocaldarius
NZ_FSLH01000026.1:759-929	gi|1117501721|embl|SIH61006.1|	100	57	0	0	1	171	96	152	1e-23	116.7	SIH61006.1	Uncharacterised protein [Mycobacteroides abscessus subsp. abscessus]	157	live	1185650	2016-12-14	2016-12-14		Mycobacteroides abscessus subsp. abscessus	Bacteria	1	FSLH01000026.1:474-947	FSLH01000026.1	Mycobacterium abscessus subsp. abscessus strain 1082 genome assembly, contig: ERS383203SCcontig000026, whole genome shotgun sequence	1774	ALR	nr	bacteria	|-__root|-__cellular_organisms|k__Bacteria|-__Terrabacteria_group|p__Actinobacteria|c__Actinobacteria|o__Corynebacteriales|f__Mycobacteriaceae|g__Mycobacteroides|s__Mycobacteroides_abscessus|-__Mycobacteroides_abscessus_subsp._abscessus
NZ_QOIT01000014.1:49-218	gi|1037143138|embl|SBT57464.1|	100	53	0	0	159	1	1	53	2e-21	109	SBT57464.1	hypothetical protein POVWA1_081740 [Plasmodium ovale wallikeri]	164	live	864142	2016-06-16	2016-06-16		Plasmodium ovale wallikeri	Eukaryota	1	FLRD01001505.1:1130-1727	FLRD01001505.1	Plasmodium ovale wallikeri genome assembly, contig: contig1505, whole genome shotgun sequence	1767	ALR	nr	bacteria	|-__root|-__cellular_organisms|k__Eukaryota|-__Alveolata|p__Apicomplexa|c__Aconoidasida|o__Haemosporida|f__Plasmodiidae|g__Plasmodium|-__Plasmodium_(Plasmodium)|s__Plasmodium_ovale|-__Plasmodium_ovale_wallikeri
NZ_PDIU01000016.1:1-154	gi|1160753371|ref|WP_079610619.1|	98.04	51	1	0	153	1	35	85	1e-21	109.8	WP_079610619.1	hypothetical protein, partial [Mycobacteroides abscessus]	85	live	36809	2017-03-18	2017-03-18		Mycobacteroides abscessus	Bacteria	1	NZ_FVQX01000030.1:1-257	NZ_FVQX01000030.1	Mycobacteroides abscessus subsp. abscessus strain 1156, whole genome shotgun sequence	1765	HSATII	nr	bacteria	|-__root|-__cellular_organisms|k__Bacteria|-__Terrabacteria_group|p__Actinobacteria|c__Actinobacteria|o__Corynebacteriales|f__Mycobacteriaceae|g__Mycobacteroides|s__Mycobacteroides_abscessus
NZ_PYPZ01000129.1:1-965	gi|1382142254|ref|WP_108011531.1|	99.22	129	1	0	192	578	1	129	5e-65	256.5	WP_108011531.1	hypothetical protein [Mycobacterium tuberculosis]	129	live	1773	2018-04-25	2018-04-25		Mycobacterium tuberculosis	Bacteria	1	NZ_PYPZ01000129.1:192-581	NZ_PYPZ01000129.1	Mycobacterium tuberculosis strain AUH13 NODE_136_length_1764_cov_0.19633, whole genome shotgun sequence	1764	L1PBa_5end	nr	bacteria	|-__root|-__cellular_organisms|k__Bacteria|-__Terrabacteria_group|p__Actinobacteria|c__Actinobacteria|o__Corynebacteriales|f__Mycobacteriaceae|g__Mycobacterium|-__Mycobacterium_tuberculosis_complex|s__Mycobacterium_tuberculosis
NZ_PYPZ01000129.1:1-965	gi|1382142257|ref|WP_108011534.1|	98.67	75	1	0	499	723	1	75	4e-33	150.6	WP_108011534.1	hypothetical protein [Mycobacterium tuberculosis]	75	live	1773	2018-04-25	2018-04-25		Mycobacterium tuberculosis	Bacteria	1	NZ_PYPZ01000129.1:499-726	NZ_PYPZ01000129.1	Mycobacterium tuberculosis strain AUH13 NODE_136_length_1764_cov_0.19633, whole genome shotgun sequence	1764	L1PBa_5end	nr	bacteria	|-__root|-__cellular_organisms|k__Bacteria|-__Terrabacteria_group|p__Actinobacteria|c__Actinobacteria|o__Corynebacteriales|f__Mycobacteriaceae|g__Mycobacterium|-__Mycobacterium_tuberculosis_complex|s__Mycobacterium_tuberculosis
NZ_FVQV01000023.1:1-169	gi|883738538|embl|CKA28361.1|	100	55	0	0	3	167	12	66	4e-25	121.7	CKA28361.1	Uncharacterised protein [Streptococcus pneumoniae]	69	live	1313	2015-03-23	2015-06-14		Streptococcus pneumoniae	Bacteria	1	CMIB01000047.1:1363-1572	CMIB01000047.1	Streptococcus pneumoniae genome assembly 7038_6#2, scaffold ERS022488SCcontig000047, whole genome shotgun sequence	1753	HSATII	nr	bacteria	|-__root|-__cellular_organisms|k__Bacteria|-__Terrabacteria_group|p__Firmicutes|c__Bacilli|o__Lactobacillales|f__Streptococcaceae|g__Streptococcus|s__Streptococcus_pneumoniae
NZ_PDIU01000016.1:1-154	gi|912712909|ref|WP_050244676.1|	98.04	51	1	0	153	1	35	85	1e-21	109.8	WP_050244676.1	hypothetical protein, partial [Streptococcus pneumoniae]	87	live	1313	2015-08-05	2015-08-05		Streptococcus pneumoniae	Bacteria	1	NZ_CMIB01000047.1:1-263	NZ_CMIB01000047.1	Streptococcus pneumoniae strain SMRU2978, whole genome shotgun sequence	1753	HSATII	nr	bacteria	|-__root|-__cellular_organisms|k__Bacteria|-__Terrabacteria_group|p__Firmicutes|c__Bacilli|o__Lactobacillales|f__Streptococcaceae|g__Streptococcus|s__Streptococcus_pneumoniae
NZ_QEYI01000017.1:69-3362	gi|1418763997|gb|RAZ27066.1|	96.81	282	9	0	2437	3282	1	282	4e-158	568.5	RAZ27066.1	endonuclease, partial [Enterobacter hormaechei subsp. xiangfangensis]	282	live	1296536	2018-07-06	2018-07-06		Enterobacter hormaechei subsp. xiangfangensis	Bacteria	1	QMDA01000111.1:254-1101	QMDA01000111.1	Enterobacter hormaechei subsp. xiangfangensis strain 105 E9 105E9_S101_R1__paired__contig_112, whole genome shotgun sequence	1748	L1P1_orf2	nr	bacteria	|-__root|-__cellular_organisms|k__Bacteria|p__Proteobacteria|c__Gammaproteobacteria|o__Enterobacterales|f__Enterobacteriaceae|g__Enterobacter|-__Enterobacter_cloacae_complex|s__Enterobacter_hormaechei|-__Enterobacter_hormaechei_subsp._xiangfangensis
NZ_QDDX01000120.1:694-853	gi|799785598|embl|CEV84390.1|	100	53	0	0	160	2	1	53	4e-23	114.8	CEV84390.1	Uncharacterised protein [Streptococcus pneumoniae]	56	live	1313	2015-03-15	2015-06-14		Streptococcus pneumoniae	Bacteria	12	CFBR01000063.1:1521-1691,CKCF01000050.1:74-244,CLCE01000811.1:863-1033,CMHC01000043.1:1607-1777,CMHF01000071.1:659-829,CRBZ01001415.1:27-197,CRTU01000070.1:369-539,FECI01000023.1:1383-1553,FSEY01000032.1:538-708,FSLH01000039.1:793-963,FVQV01000023.1:308-478,FVQX01000030.1:1058-1228	CFBR01000063.1	Streptococcus pneumoniae genome assembly 6731_4#20, scaffold ERS020586SCcontig000063, whole genome shotgun sequence	1748	HSATII	nr	bacteria	|-__root|-__cellular_organisms|k__Bacteria|-__Terrabacteria_group|p__Firmicutes|c__Bacilli|o__Lactobacillales|f__Streptococcaceae|g__Streptococcus|s__Streptococcus_pneumoniae
NZ_QNUV01000083.1:183-344	gi|916199716|ref|WP_050967581.1|	100	53	0	0	161	3	45	97	3e-24	118.6	WP_050967581.1	MULTISPECIES: hypothetical protein [Bacilli]	127	live	91061	2015-08-13	2017-06-17		Bacilli	Bacteria	8	NZ_CFBR01000063.1:337-720,NZ_CRTU01000070.1:961-1344,NZ_FECI01000023.1:199-582,NZ_MUNL01000072.1:1106-1489,CFBR01000063.1:337-720,CRTU01000070.1:961-1344,FECI01000023.1:199-582,MUNL01000072.1:1106-1489	NZ_CFBR01000063.1	Streptococcus pneumoniae strain SMRU1076, whole genome shotgun sequence	1748	HSATII	nr	bacteria	|-__root|-__cellular_organisms|k__Bacteria|-__Terrabacteria_group|p__Firmicutes|c__Bacilli
NZ_LMDS01000003.1:871-1030	gi|942671779|ref|WP_055387452.1|	98.11	53	1	0	159	1	22	74	5e-23	114.4	WP_055387452.1	hypothetical protein, partial [Streptococcus pneumoniae]	84	live	1313	2015-10-27	2015-10-27		Streptococcus pneumoniae	Bacteria	1	NZ_CFBR01000063.1:1-252	NZ_CFBR01000063.1	Streptococcus pneumoniae strain SMRU1076, whole genome shotgun sequence	1748	HSATII	nr	bacteria	|-__root|-__cellular_organisms|k__Bacteria|-__Terrabacteria_group|p__Firmicutes|c__Bacilli|o__Lactobacillales|f__Streptococcaceae|g__Streptococcus|s__Streptococcus_pneumoniae
NZ_JGWV01000075.1:1-1448	gi|633413248|gb|KDB98530.1|	98.97	97	1	0	482	772	1	97	9e-51	210.3	KDB98530.1	hypothetical protein AZ18_5250 [Bordetella bronchiseptica D993]	97	live	1458260	2014-05-12	2014-06-27		Bordetella bronchiseptica D993	Bacteria	1	JGWV01000075.1:482-775	JGWV01000075.1	Bordetella bronchiseptica D993 ctg7180000010420, whole genome shotgun sequence	1746	L1P1_orf2	nr	bacteria	|-__root|-__cellular_organisms|k__Bacteria|p__Proteobacteria|c__Betaproteobacteria|o__Burkholderiales|f__Alcaligenaceae|g__Bordetella|s__Bordetella_bronchiseptica|-__Bordetella_bronchiseptica_D993
NZ_JGWV01000075.1:1-1448	gi|633413249|gb|KDB98531.1|	100	191	0	0	876	1448	1	191	2e-110	408.3	KDB98531.1	hypothetical protein AZ18_5251, partial [Bordetella bronchiseptica D993]	290	live	1458260	2014-05-12	2014-06-27		Bordetella bronchiseptica D993	Bacteria	1	JGWV01000075.1:876-1746	JGWV01000075.1	Bordetella bronchiseptica D993 ctg7180000010420, whole genome shotgun sequence	1746	L1P1_orf2	nr	bacteria	|-__root|-__cellular_organisms|k__Bacteria|p__Proteobacteria|c__Betaproteobacteria|o__Burkholderiales|f__Alcaligenaceae|g__Bordetella|s__Bordetella_bronchiseptica|-__Bordetella_bronchiseptica_D993
NZ_MPTK01000063.1:2-161	gi|1133092398|gb|OMD84107.1|	100	52	0	0	3	158	2	53	1e-25	123.2	OMD84107.1	hypothetical protein BSK67_30095, partial [Paenibacillus odorifer]	66	live	189426	2017-01-18	2017-01-18		Paenibacillus odorifer	Bacteria	1	MPTK01000063.1:1-201	MPTK01000063.1	Paenibacillus odorifer strain FSL H3-0287 NODE_63_length_1744_cov_0.0924012_ID_6837, whole genome shotgun sequence	1744	HSATII	nr	bacteria	|-__root|-__cellular_organisms|k__Bacteria|-__Terrabacteria_group|p__Firmicutes|c__Bacilli|o__Bacillales|f__Paenibacillaceae|g__Paenibacillus|s__Paenibacillus_odorifer
NZ_PYPZ01000098.1:2341-5634	gi|1394122301|gb|PWX07245.1|	98.44	256	4	0	2443	3210	1	256	7e-146	527.7	PWX07245.1	hypothetical protein CYK68_14735 [Clostridium perfringens]	261	live	1502	2018-05-31	2018-05-31		Clostridium perfringens	Bacteria	1	PJSR01000010.1:131-916	PJSR01000010.1	Clostridium perfringens strain PC5 scaffold00010_pilon, whole genome shotgun sequence	1734	L1P1_orf2	nr	bacteria	|-__root|-__cellular_organisms|k__Bacteria|-__Terrabacteria_group|p__Firmicutes|c__Clostridia|o__Clostridiales|f__Clostridiaceae|g__Clostridium|s__Clostridium_perfringens
NZ_FTZV01000317.1:1847-2017	gi|1117501717|embl|SIH61137.1|	100	42	0	0	6	131	1	42	1e-14	86.7	SIH61137.1	Uncharacterised protein [Mycobacteroides abscessus subsp. abscessus]	42	live	1185650	2016-12-14	2016-12-14		Mycobacteroides abscessus subsp. abscessus	Bacteria	2	FSLH01000027.1:1395-1523,FTZV01000317.1:1852-1980	FSLH01000027.1	Mycobacterium abscessus subsp. abscessus strain 1082 genome assembly, contig: ERS383203SCcontig000027, whole genome shotgun sequence	1733	ALR	nr	bacteria	|-__root|-__cellular_organisms|k__Bacteria|-__Terrabacteria_group|p__Actinobacteria|c__Actinobacteria|o__Corynebacteriales|f__Mycobacteriaceae|g__Mycobacteroides|s__Mycobacteroides_abscessus|-__Mycobacteroides_abscessus_subsp._abscessus
NZ_FTZV01000281.1:1-153	gi|895651726|embl|CNX50238.1|	100	48	0	0	8	151	1	48	3e-18	98.6	CNX50238.1	Uncharacterised protein [Mycobacterium tuberculosis]	64	live	1773	2015-03-23	2015-06-14		Mycobacterium tuberculosis	Bacteria	1	CQSC01000242.1:831-1025	CQSC01000242.1	Mycobacterium tuberculosis genome assembly 5227_6#11, scaffold ERS013440SCcontig000242, whole genome shotgun sequence	1711	ALR	nr	bacteria	|-__root|-__cellular_organisms|k__Bacteria|-__Terrabacteria_group|p__Actinobacteria|c__Actinobacteria|o__Corynebacteriales|f__Mycobacteriaceae|g__Mycobacterium|-__Mycobacterium_tuberculosis_complex|s__Mycobacterium_tuberculosis
NZ_FPIK01000013.1:4819-5850	gi|1168812564|ref|WP_080382479.1|	100	239	0	0	1	717	9	247	3e-136	493.4	WP_080382479.1	hypothetical protein [Chlamydia trachomatis]	259	live	813	2017-03-27	2017-03-27		Chlamydia trachomatis	Bacteria	2	NZ_CVNW01000017.1:293-1072,CVNW01000017.1:293-1072	NZ_CVNW01000017.1	Chlamydia trachomatis strain R33512extract, whole genome shotgun sequence	1687	L1P1_orf2	nr	bacteria	|-__root|-__cellular_organisms|k__Bacteria|-__PVC_group|p__Chlamydiae|c__Chlamydiia|o__Chlamydiales|f__Chlamydiaceae|-__Chlamydia/Chlamydophila_group|g__Chlamydia|s__Chlamydia_trachomatis
NZ_FQLL01000005.1:2080-3150	gi|1196985424|ref|WP_086404983.1|	99.53	212	1	0	2	637	3	214	4e-118	433.3	WP_086404983.1	hypothetical protein, partial [Chlamydia abortus]	214	live	83555	2017-05-24	2017-05-24		Chlamydia abortus	Bacteria	1	NZ_FPIH01000016.1:1039-1682	NZ_FPIH01000016.1	Chlamydia abortus strain 86/30, whole genome shotgun sequence	1682	L1P1_orf2	nr	bacteria	|-__root|-__cellular_organisms|k__Bacteria|-__PVC_group|p__Chlamydiae|c__Chlamydiia|o__Chlamydiales|f__Chlamydiaceae|-__Chlamydia/Chlamydophila_group|g__Chlamydia|s__Chlamydia_abortus
NZ_QLYW01000009.1:62-231	gi|1037155127|embl|SBT57777.1|	100	53	0	0	12	170	1	53	6e-22	110.9	SBT57777.1	hypothetical protein POVWA2_081510 [Plasmodium ovale wallikeri]	180	live	864142	2016-06-16	2016-06-16		Plasmodium ovale wallikeri	Eukaryota	1	FLRE01002008.1:651-1493	FLRE01002008.1	Plasmodium ovale wallikeri genome assembly, contig: contig2008, whole genome shotgun sequence	1672	ALR	nr	bacteria	|-__root|-__cellular_organisms|k__Eukaryota|-__Alveolata|p__Apicomplexa|c__Aconoidasida|o__Haemosporida|f__Plasmodiidae|g__Plasmodium|-__Plasmodium_(Plasmodium)|s__Plasmodium_ovale|-__Plasmodium_ovale_wallikeri
NZ_QDDV01000090.1:408-1302	gi|1133918942|ref|WP_076292277.1|	99	200	2	0	82	681	1	200	2e-116	427.2	WP_076292277.1	DUF1725 domain-containing protein [Paenibacillus pabuli]	200	live	1472	2017-01-20	2017-07-09		Paenibacillus pabuli	Bacteria	2	NZ_MRTE01000026.1:60-662,MRTE01000026.1:60-662	NZ_MRTE01000026.1	Paenibacillus pabuli strain FSL F4-0087 NODE_26_length_1669_cov_0.0547771_ID_3126, whole genome shotgun sequence	1669	L1HS_3end	nr	bacteria	|-__root|-__cellular_organisms|k__Bacteria|-__Terrabacteria_group|p__Firmicutes|c__Bacilli|o__Bacillales|f__Paenibacillaceae|g__Paenibacillus|s__Paenibacillus_pabuli
NZ_FPMA01000004.1:1-1333	gi|1196956002|ref|WP_086380393.1|	100	338	0	0	1184	171	1	338	4e-175	623.2	WP_086380393.1	hypothetical protein [Chlamydia abortus]	338	live	83555	2017-05-24	2017-05-24		Chlamydia abortus	Bacteria	12	NZ_FPLU01000005.1:482-1498,NZ_FPLY01000003.1:4080-5096,NZ_FPMA01000004.1:168-1184,FPLQ01000015.1:1242-2258,FPLT01000002.1:3990-5006,FPMA01000004.1:168-1184,FPMH01000011.1:216-1232,FPLU01000005.1:482-1498,FPLY01000003.1:4080-5096,FPMT01000007.1:1032-2048,FPMU01000006.1:5150-6166,FPMR01000016.1:1599-2615	NZ_FPLU01000005.1	Chlamydia abortus strain 99DC1, whole genome shotgun sequence	1665	L1HS_5end	nr	bacteria	|-__root|-__cellular_organisms|k__Bacteria|-__PVC_group|p__Chlamydiae|c__Chlamydiia|o__Chlamydiales|f__Chlamydiaceae|-__Chlamydia/Chlamydophila_group|g__Chlamydia|s__Chlamydia_abortus
NZ_CGZQ01000069.1:1-1661	gi|1154934470|ref|WP_078839791.1|	100	338	0	0	443	1456	1	338	8e-180	639.4	WP_078839791.1	MULTISPECIES: hypothetical protein [Terrabacteria group]	338	live	1783272	2017-03-11	2017-03-14		Terrabacteria group	Bacteria	4	NZ_CGZQ01000069.1:443-1459,NZ_CQTE01000212.1:163-1179,CGZQ01000069.1:443-1459,CQTE01000212.1:163-1179	NZ_CGZQ01000069.1	Streptococcus pneumoniae strain SMRU2282, whole genome shotgun sequence	1661	L1HS_5end	nr	bacteria	|-__root|-__cellular_organisms|k__Bacteria|-__Terrabacteria_group
NZ_FPMF01000004.1:1-961	gi|1190687858|embl|SGA30397.1|	100	245	0	0	67	801	1	245	1e-121	444.5	SGA30397.1	Retron-type reverse transcriptase [Chlamydia abortus]	245	live	83555	2017-05-10	2017-05-10		Chlamydia abortus	Bacteria	1	FPMF01000004.1:67-804	FPMF01000004.1	Chlamydia abortus strain C23_98 genome assembly, contig: ERS067047SCcontig000004, whole genome shotgun sequence	1655	L1P1_orf2	nr	bacteria	|-__root|-__cellular_organisms|k__Bacteria|-__PVC_group|p__Chlamydiae|c__Chlamydiia|o__Chlamydiales|f__Chlamydiaceae|-__Chlamydia/Chlamydophila_group|g__Chlamydia|s__Chlamydia_abortus
NZ_LZRE01000006.1:4116-4877	gi|1190687859|embl|SGA30402.1|	98.75	80	1	0	321	82	1	80	4e-39	169.9	SGA30402.1	Retron-type reverse transcriptase [Chlamydia abortus]	80	live	83555	2017-05-10	2017-05-10		Chlamydia abortus	Bacteria	1	FPMF01000004.1:1253-1495	FPMF01000004.1	Chlamydia abortus strain C23_98 genome assembly, contig: ERS067047SCcontig000004, whole genome shotgun sequence	1655	L1HS_3end	nr	bacteria	|-__root|-__cellular_organisms|k__Bacteria|-__PVC_group|p__Chlamydiae|c__Chlamydiia|o__Chlamydiales|f__Chlamydiaceae|-__Chlamydia/Chlamydophila_group|g__Chlamydia|s__Chlamydia_abortus
NZ_FPMS01000009.1:630-1652	gi|1190716137|embl|SGA29369.1|	100	284	0	0	852	1	1	284	3e-158	566.6	SGA29369.1	Retron-type reverse transcriptase [Chlamydia abortus]	461	live	83555	2017-05-10	2017-05-10		Chlamydia abortus	Bacteria	1	FPMS01000009.1:96-1481	FPMS01000009.1	Chlamydia abortus strain 03DC37 genome assembly, contig: ERS067055SCcontig000009, whole genome shotgun sequence	1652	L1P1_orf2	nr	bacteria	|-__root|-__cellular_organisms|k__Bacteria|-__PVC_group|p__Chlamydiae|c__Chlamydiia|o__Chlamydiales|f__Chlamydiaceae|-__Chlamydia/Chlamydophila_group|g__Chlamydia|s__Chlamydia_abortus
NZ_JYDX01000100.1:2647-3251	gi|873890557|ref|WP_048597225.1|	98.15	54	1	0	535	374	6	59	7e-23	115.2	WP_048597225.1	hypothetical protein [Atopobium vaginae]	79	live	82135	2015-07-09	2015-07-09		Atopobium vaginae	Bacteria	2	NZ_LFWE01000019.1:32-271,LFWE01000019.1:32-271	NZ_LFWE01000019.1	Atopobium vaginae strain 44061 contig00019, whole genome shotgun sequence	1643	L1HS_3end	nr	bacteria	|-__root|-__cellular_organisms|k__Bacteria|-__Terrabacteria_group|p__Actinobacteria|c__Coriobacteriia|o__Coriobacteriales|f__Atopobiaceae|g__Atopobium|s__Atopobium_vaginae
NZ_LFWE01000019.1:181-1168	gi|873890558|ref|WP_048597226.1|	98.84	86	1	0	935	678	1	86	1e-40	176	WP_048597226.1	hypothetical protein [Atopobium vaginae]	86	live	82135	2015-07-09	2015-07-09		Atopobium vaginae	Bacteria	2	NZ_LFWE01000019.1:855-1115,LFWE01000019.1:855-1115	NZ_LFWE01000019.1	Atopobium vaginae strain 44061 contig00019, whole genome shotgun sequence	1643	L1P1_orf2	nr	bacteria	|-__root|-__cellular_organisms|k__Bacteria|-__Terrabacteria_group|p__Actinobacteria|c__Coriobacteriia|o__Coriobacteriales|f__Atopobiaceae|g__Atopobium|s__Atopobium_vaginae
NZ_FLLZ01000146.1:1204-1418	gi|1034196200|embl|SBO33916.1|	98.31	59	1	0	32	208	1	59	1e-24	119.8	SBO33916.1	hypothetical protein ANAPC4_01361 [Anaplasma phagocytophilum]	59	live	948	2016-06-02	2016-06-02		Anaplasma phagocytophilum	Bacteria	1	FLLZ01000146.1:1235-1414	FLLZ01000146.1	Anaplasma phagocytophilum strain C4 genome assembly, contig: contig000146, whole genome shotgun sequence	1631	L1P1_orf2	nr	bacteria	|-__root|-__cellular_organisms|k__Bacteria|p__Proteobacteria|c__Alphaproteobacteria|o__Rickettsiales|f__Anaplasmataceae|g__Anaplasma|-__phagocytophilum_group|s__Anaplasma_phagocytophilum
NZ_PYPZ01000098.1:2341-5634	gi|878611906|embl|CIQ13845.1|	100	100	0	0	2968	3267	1	100	2e-49	207.6	CIQ13845.1	Retron-type reverse transcriptase [Streptococcus pneumoniae]	101	live	1313	2015-03-21	2015-06-13		Streptococcus pneumoniae	Bacteria	1	CKCF01000051.1:355-660	CKCF01000051.1	Streptococcus pneumoniae genome assembly 6593_4#19, scaffold ERS019273SCcontig000051, whole genome shotgun sequence	1626	L1P1_orf2	nr	bacteria	|-__root|-__cellular_organisms|k__Bacteria|-__Terrabacteria_group|p__Firmicutes|c__Bacilli|o__Lactobacillales|f__Streptococcaceae|g__Streptococcus|s__Streptococcus_pneumoniae
NZ_LWDC01000038.1:1-744	gi|878611907|embl|CIQ13881.1|	100	227	0	0	744	64	60	286	1e-134	486.9	CIQ13881.1	Retron-type reverse transcriptase [Streptococcus pneumoniae]	286	live	1313	2015-03-21	2015-06-13		Streptococcus pneumoniae	Bacteria	1	CKCF01000051.1:726-1586	CKCF01000051.1	Streptococcus pneumoniae genome assembly 6593_4#19, scaffold ERS019273SCcontig000051, whole genome shotgun sequence	1626	L1HS_3end	nr	bacteria	|-__root|-__cellular_organisms|k__Bacteria|-__Terrabacteria_group|p__Firmicutes|c__Bacilli|o__Lactobacillales|f__Streptococcaceae|g__Streptococcus|s__Streptococcus_pneumoniae
NZ_AAXW01000147.1:256-1175	gi|126617072|gb|EAZ87922.1|	100	227	0	0	920	240	151	377	7e-136	491.9	EAZ87922.1	hypothetical protein CY0110_00950, partial [Cyanothece sp. CCY0110]	377	live	391612	2007-03-06	2007-03-06		Cyanothece sp. CCY0110	Bacteria	1	AAXW01000147.1:492-1625	AAXW01000147.1	Cyanothece sp. CCY0110 1101676644431, whole genome shotgun sequence	1625	L1HS_3end	nr	bacteria	|-__root|-__cellular_organisms|k__Bacteria|-__Terrabacteria_group|-__Cyanobacteria/Melainabacteria_group|p__Cyanobacteria|-__Oscillatoriophycideae|o__Oscillatoriales|f__Cyanothecaceae|g__Cyanothece|s__Cyanothece_sp._CCY0110
NZ_AAXW01000147.1:256-1175	gi|737833630|ref|WP_035800930.1|	100	157	0	0	710	240	1	157	3e-93	350.5	WP_035800930.1	DUF1725 domain-containing protein [Cyanothece sp. CCY0110]	157	live	391612	2014-12-24	2017-07-10		Cyanothece sp. CCY0110	Bacteria	1	NZ_AAXW01000147.1:492-965	NZ_AAXW01000147.1	Cyanothece sp. CCY0110 1101676644431, whole genome shotgun sequence	1625	L1HS_3end	nr	bacteria	|-__root|-__cellular_organisms|k__Bacteria|-__Terrabacteria_group|-__Cyanobacteria/Melainabacteria_group|p__Cyanobacteria|-__Oscillatoriophycideae|o__Oscillatoriales|f__Cyanothecaceae|g__Cyanothece|s__Cyanothece_sp._CCY0110
NZ_JHOK01000061.1:480-649	gi|620700579|gb|KAK59965.1|	100	56	0	0	169	2	19	74	4e-26	124.8	KAK59965.1	hypothetical protein AZ22_5144 [Bordetella bronchiseptica 980-2]	95	live	1458264	2014-04-29	2014-06-30		Bordetella bronchiseptica 980-2	Bacteria	1	JHOK01000061.1:415-702	JHOK01000061.1	Bordetella bronchiseptica 980-2 ctg7180000048752, whole genome shotgun sequence	1624	HSATII	nr	bacteria	|-__root|-__cellular_organisms|k__Bacteria|p__Proteobacteria|c__Betaproteobacteria|o__Burkholderiales|f__Alcaligenaceae|g__Bordetella|s__Bordetella_bronchiseptica|-__Bordetella_bronchiseptica_980-2
NZ_MRBH01000255.1:828-996	gi|1125780169|embl|SIP65918.1|	100	56	0	0	2	169	29	84	1e-22	113.6	SIP65918.1	conserved hypothetical protein [Mycobacterium tuberculosis]	87	live	1773	2016-12-26	2016-12-26		Mycobacterium tuberculosis	Bacteria	1	FTKO01000174.1:745-1008	FTKO01000174.1	Mycobacterium tuberculosis strain MTB13_M genome assembly, contig: BN9982_Contig_255, whole genome shotgun sequence	1623	ALR	nr	bacteria	|-__root|-__cellular_organisms|k__Bacteria|-__Terrabacteria_group|p__Actinobacteria|c__Actinobacteria|o__Corynebacteriales|f__Mycobacteriaceae|g__Mycobacterium|-__Mycobacterium_tuberculosis_complex|s__Mycobacterium_tuberculosis
NZ_MRBH01000255.1:1169-1336	gi|1125780171|embl|SIP65920.1|	100	56	0	0	1	168	2	57	1e-22	113.2	SIP65920.1	conserved hypothetical protein [Mycobacterium tuberculosis]	60	live	1773	2016-12-26	2016-12-26		Mycobacterium tuberculosis	Bacteria	1	FTKO01000174.1:1166-1348	FTKO01000174.1	Mycobacterium tuberculosis strain MTB13_M genome assembly, contig: BN9982_Contig_255, whole genome shotgun sequence	1623	ALR	nr	bacteria	|-__root|-__cellular_organisms|k__Bacteria|-__Terrabacteria_group|p__Actinobacteria|c__Actinobacteria|o__Corynebacteriales|f__Mycobacteriaceae|g__Mycobacterium|-__Mycobacterium_tuberculosis_complex|s__Mycobacterium_tuberculosis
NZ_MSRF01000225.1:1233-1621	gi|1143130451|ref|WP_077113014.1|	100	53	0	0	1	159	12	64	1e-23	116.7	WP_077113014.1	hypothetical protein [Bacillus sp. VT-16-64]	64	live	1917019	2017-02-08	2017-02-08		Bacillus sp. VT-16-64	Bacteria	2	NZ_MSRF01000225.1:1200-1394,MSRF01000225.1:1200-1394	NZ_MSRF01000225.1	Bacillus sp. VT-16-64 NODE_245, whole genome shotgun sequence	1621	L1HS_3end	nr	bacteria	|-__root|-__cellular_organisms|k__Bacteria|-__Terrabacteria_group|p__Firmicutes|c__Bacilli|o__Bacillales|f__Bacillaceae|g__Bacillus|s__Bacillus_sp._VT-16-64
NZ_KI271244.1:382-614	gi|544231808|gb|ERK44924.1|	100	71	0	0	214	2	1	71	4e-39	167.9	ERK44924.1	hypothetical protein HMPREF0495_00530, partial [Lactobacillus brevis ATCC 14869 = DSM 20054]	76	live	649758	2013-09-18	2013-09-18		Lactobacillus brevis ATCC 14869 = DSM 20054	Bacteria	2	AWVK01000024.1:1-228,KI271244.1:368-595	AWVK01000024.1	Lactobacillus brevis ATCC 14869 = DSM 20054 strain ATCC 14869 L_brevisHMPREF0495-1.0_Cont433.2, whole genome shotgun sequence	1621	HSATII	nr	bacteria	|-__root|-__cellular_organisms|k__Bacteria|-__Terrabacteria_group|p__Firmicutes|c__Bacilli|o__Lactobacillales|f__Lactobacillaceae|g__Lactobacillus|s__Lactobacillus_brevis|-__Lactobacillus_brevis_ATCC_14869_=_DSM_20054
NZ_KZ794899.1:6-223	gi|544231809|gb|ERK44925.1|	95.52	67	3	0	201	1	161	237	2e-29	136	ERK44925.1	hypothetical protein HMPREF0495_00531 [Lactobacillus brevis ATCC 14869 = DSM 20054]	307	live	649758	2013-09-18	2013-09-18		Lactobacillus brevis ATCC 14869 = DSM 20054	Bacteria	2	AWVK01000024.1:500-1423,KI271244.1:867-1790	AWVK01000024.1	Lactobacillus brevis ATCC 14869 = DSM 20054 strain ATCC 14869 L_brevisHMPREF0495-1.0_Cont433.2, whole genome shotgun sequence	1621	HSATII	nr	bacteria	|-__root|-__cellular_organisms|k__Bacteria|-__Terrabacteria_group|p__Firmicutes|c__Bacilli|o__Lactobacillales|f__Lactobacillaceae|g__Lactobacillus|s__Lactobacillus_brevis|-__Lactobacillus_brevis_ATCC_14869_=_DSM_20054
NZ_POWH01000657.1:20-763	gi|695678712|ref|WP_032631523.1|	100	157	0	0	212	682	1	157	3e-92	346.3	WP_032631523.1	DUF1725 domain-containing protein [Pseudomonas syringae]	157	live	317	2014-10-09	2017-07-08		Pseudomonas syringae	Bacteria	1	NZ_AUZR02000040.1:1061-1534	NZ_AUZR02000040.1	Pseudomonas syringae pv. pisi str. PP1 contig40.1, whole genome shotgun sequence	1619	L1HS_3end	nr	bacteria	|-__root|-__cellular_organisms|k__Bacteria|p__Proteobacteria|c__Gammaproteobacteria|o__Pseudomonadales|f__Pseudomonadaceae|g__Pseudomonas|-__Pseudomonas_syringae_group|-__Pseudomonas_syringae_group_genomosp._1|s__Pseudomonas_syringae
NZ_MRBH01000256.1:122-1053	gi|1125780166|embl|SIP65924.1|	100	250	0	0	183	932	1	250	3e-140	506.5	SIP65924.1	conserved hypothetical protein [Mycobacterium tuberculosis]	427	live	1773	2016-12-26	2016-12-26		Mycobacterium tuberculosis	Bacteria	1	FTKO01000175.1:304-1587	FTKO01000175.1	Mycobacterium tuberculosis strain MTB13_M genome assembly, contig: BN9982_Contig_256, whole genome shotgun sequence	1618	L1P1_orf2	nr	bacteria	|-__root|-__cellular_organisms|k__Bacteria|-__Terrabacteria_group|p__Actinobacteria|c__Actinobacteria|o__Corynebacteriales|f__Mycobacteriaceae|g__Mycobacterium|-__Mycobacterium_tuberculosis_complex|s__Mycobacterium_tuberculosis
NZ_MRBQ01000155.1:1-622	gi|1182474678|gb|ORT78121.1|	95.54	157	7	0	121	591	1	157	1e-87	330.1	ORT78121.1	hypothetical protein BS299_22240 [Mycobacterium tuberculosis M13]	157	live	1448838	2017-04-18	2017-04-18		Mycobacterium tuberculosis M13	Bacteria	1	MRBH01000256.1:1114-1587	MRBH01000256.1	Mycobacterium tuberculosis M13 contig256_S4309257_E4310875_L1618, whole genome shotgun sequence	1618	L1HS_3end	nr	bacteria	|-__root|-__cellular_organisms|k__Bacteria|-__Terrabacteria_group|p__Actinobacteria|c__Actinobacteria|o__Corynebacteriales|f__Mycobacteriaceae|g__Mycobacterium|-__Mycobacterium_tuberculosis_complex|s__Mycobacterium_tuberculosis|-__Mycobacterium_tuberculosis_M13
NZ_FTZV01000301.1:552-722	gi|882810515|embl|CJH71270.1|	100	57	0	0	171	1	96	152	7e-24	117.5	CJH71270.1	Uncharacterised protein [Streptococcus pneumoniae]	157	live	1313	2015-03-21	2015-06-14		Streptococcus pneumoniae	Bacteria	3	CLCE01000539.1:747-1220,CMHC01000041.1:887-1360,CMKS01000066.1:445-918	CLCE01000539.1	Streptococcus pneumoniae genome assembly 6871_2#19, scaffold ERS021353SCcontig000539, whole genome shotgun sequence	1618	ALR	nr	bacteria	|-__root|-__cellular_organisms|k__Bacteria|-__Terrabacteria_group|p__Firmicutes|c__Bacilli|o__Lactobacillales|f__Streptococcaceae|g__Streptococcus|s__Streptococcus_pneumoniae
NZ_CMIH01000036.1:1324-1486	gi|1154942266|ref|WP_078847587.1|	100	54	0	0	1	162	23	76	6e-23	114.4	WP_078847587.1	hypothetical protein [Streptococcus pneumoniae]	92	live	1313	2017-03-11	2017-03-11		Streptococcus pneumoniae	Bacteria	1	NZ_CMIH01000036.1:1258-1536	NZ_CMIH01000036.1	Streptococcus pneumoniae strain SMRU2982, whole genome shotgun sequence	1616	HSATII	nr	bacteria	|-__root|-__cellular_organisms|k__Bacteria|-__Terrabacteria_group|p__Firmicutes|c__Bacilli|o__Lactobacillales|f__Streptococcaceae|g__Streptococcus|s__Streptococcus_pneumoniae
NZ_CMIH01000036.1:1324-1486	gi|883087931|embl|CKA49536.1|	100	54	0	0	1	162	21	74	6e-23	114.4	CKA49536.1	Uncharacterised protein [Streptococcus pneumoniae]	90	live	1313	2015-03-23	2015-06-14		Streptococcus pneumoniae	Bacteria	1	CMIH01000036.1:1264-1536	CMIH01000036.1	Streptococcus pneumoniae genome assembly 7038_6#6, scaffold ERS022492SCcontig000036, whole genome shotgun sequence	1616	HSATII	nr	bacteria	|-__root|-__cellular_organisms|k__Bacteria|-__Terrabacteria_group|p__Firmicutes|c__Bacilli|o__Lactobacillales|f__Streptococcaceae|g__Streptococcus|s__Streptococcus_pneumoniae
NZ_FVQV01000023.1:1-169	gi|1290779317|gb|PJZ39300.1|	100	56	0	0	1	168	11	66	6e-25	120.9	PJZ39300.1	hypothetical protein CH370_22240 [Leptospira sp. JW3-C-A1]	118	live	2023180	2017-12-05	2017-12-05		Leptospira sp. JW3-C-A1	Bacteria	1	NPDO01000061.1:666-1022	NPDO01000061.1	Leptospira sp. JW3-C-A1 contig_61, whole genome shotgun sequence	1608	HSATII	nr	bacteria	|-__root|-__cellular_organisms|k__Bacteria|p__Spirochaetes|c__Spirochaetia|-__Leptospirales|f__Leptospiraceae|g__Leptospira|s__Leptospira_sp._JW3-C-A1
NZ_UGRJ01000003.1:1130579-1131300	gi|830048932|gb|KLR79752.1|	100	138	0	0	309	722	1	138	2e-73	283.5	KLR79752.1	hypothetical protein M679_11455 [Neisseria gonorrhoeae SK7842]	147	live	1352527	2015-06-10	2015-06-10		Neisseria gonorrhoeae SK7842	Bacteria	5	ATPI01000266.1:556-999,ATPG01000103.1:437-880,ATPV01000081.1:609-1052,ATQD01000082.1:578-1021,ATQX01000228.1:333-776	ATPI01000266.1	Neisseria gonorrhoeae SK7842 contig338, whole genome shotgun sequence	1604	L1HS_5end	nr	bacteria	|-__root|-__cellular_organisms|k__Bacteria|p__Proteobacteria|c__Betaproteobacteria|o__Neisseriales|f__Neisseriaceae|g__Neisseria|s__Neisseria_gonorrhoeae|-__Neisseria_gonorrhoeae_SK7842
NZ_JUHX01000047.1:25-1592	gi|733519423|gb|KHM00523.1|	100	522	0	0	1	1566	1	522	1e-302	1047	KHM00523.1	endonuclease, partial [Enterobacter hormaechei subsp. oharae]	522	live	301102	2014-12-16	2016-06-15		Enterobacter hormaechei subsp. oharae	Bacteria	1	JUHX01000047.1:25-1592	JUHX01000047.1	Enterobacter hormaechei subsp. oharae strain ND14 contig47, whole genome shotgun sequence	1592	L1P1_orf2	nr	bacteria	|-__root|-__cellular_organisms|k__Bacteria|p__Proteobacteria|c__Gammaproteobacteria|o__Enterobacterales|f__Enterobacteriaceae|g__Enterobacter|-__Enterobacter_cloacae_complex|s__Enterobacter_hormaechei|-__Enterobacter_hormaechei_subsp._oharae
NZ_JYEC01000045.1:126-1031	gi|766627151|ref|WP_044801299.1|	100	82	0	0	660	905	1	82	4e-39	170.6	WP_044801299.1	hypothetical protein [Campylobacter jejuni]	119	live	197	2015-03-09	2015-03-09		Campylobacter jejuni	Bacteria	2	NZ_JYEB01000039.1:188-547,JYEB01000039.1:188-547	NZ_JYEB01000039.1	Campylobacter jejuni subsp. jejuni strain P5-2209 contig039, whole genome shotgun sequence	1579	L1P1_orf2	nr	bacteria	|-__root|-__cellular_organisms|k__Bacteria|p__Proteobacteria|-__delta/epsilon_subdivisions|c__Epsilonproteobacteria|o__Campylobacterales|f__Campylobacteraceae|g__Campylobacter|s__Campylobacter_jejuni
NZ_LZSF01000266.1:234-403	gi|1205110854|ref|WP_087816384.1|	98.21	56	1	0	1	168	40	95	7e-27	127.5	WP_087816384.1	hypothetical protein [Psychrobacter cibarius]	163	live	282669	2017-06-12	2017-06-12		Psychrobacter cibarius	Bacteria	1	NZ_CZJV02000240.1:653-1144	NZ_CZJV02000240.1	Psychrobacter cibarius strain W1 isolate Psychrobacter cibarius, whole genome shotgun sequence	1555	HSATII	nr	bacteria	|-__root|-__cellular_organisms|k__Bacteria|p__Proteobacteria|c__Gammaproteobacteria|o__Pseudomonadales|f__Moraxellaceae|g__Psychrobacter|s__Psychrobacter_cibarius
NZ_QLYV01000044.1:556-838	gi|951098023|ref|WP_057589228.1|	100	68	0	0	12	215	25	92	4e-33	148.3	WP_057589228.1	hypothetical protein [Streptococcus pneumoniae]	92	live	1313	2015-11-10	2015-11-10		Streptococcus pneumoniae	Bacteria	1	NZ_CGZQ01000073.1:1199-1477	NZ_CGZQ01000073.1	Streptococcus pneumoniae strain SMRU2282, whole genome shotgun sequence	1550	AluSz	nr	bacteria	|-__root|-__cellular_organisms|k__Bacteria|-__Terrabacteria_group|p__Firmicutes|c__Bacilli|o__Lactobacillales|f__Streptococcaceae|g__Streptococcus|s__Streptococcus_pneumoniae
NZ_UIKY01000205.1:1-253	gi|984827885|gb|KWW68218.1|	97.73	44	1	0	232	101	1	44	1e-14	86.7	KWW68218.1	hypothetical protein AWN52_05580 [Enterococcus faecium]	83	live	1352	2016-02-01	2016-02-01		Enterococcus faecium	Bacteria	1	LRAU01000104.1:458-709	LRAU01000104.1	Enterococcus faecium strain D344RRF x C68 isolate D contig_194, whole genome shotgun sequence	1537	L1P1_orf2	nr	bacteria	|-__root|-__cellular_organisms|k__Bacteria|-__Terrabacteria_group|p__Firmicutes|c__Bacilli|o__Lactobacillales|f__Enterococcaceae|g__Enterococcus|s__Enterococcus_faecium
NZ_FQSZ01000002.1:3949-6601	gi|1190714782|embl|SFW04309.1|	98.89	180	2	0	965	1504	1	180	4e-94	355.5	SFW04309.1	Retron-type reverse transcriptase [Chlamydia abortus]	200	live	83555	2017-05-10	2017-05-10		Chlamydia abortus	Bacteria	1	FPIL01000019.1:897-1499	FPIL01000019.1	Chlamydophila abortus strain POS genome assembly, contig: ERS003306SCcontig000019, whole genome shotgun sequence	1535	L1P1_orf2	nr	bacteria	|-__root|-__cellular_organisms|k__Bacteria|-__PVC_group|p__Chlamydiae|c__Chlamydiia|o__Chlamydiales|f__Chlamydiaceae|-__Chlamydia/Chlamydophila_group|g__Chlamydia|s__Chlamydia_abortus
NZ_FQSZ01000002.1:3949-6601	gi|1197015213|ref|WP_086427308.1|	98.41	189	3	0	938	1504	1	189	5e-99	371.7	WP_086427308.1	hypothetical protein [Chlamydia abortus]	209	live	83555	2017-05-24	2017-05-24		Chlamydia abortus	Bacteria	1	NZ_FPIL01000019.1:897-1526	NZ_FPIL01000019.1	Chlamydia abortus strain POS, whole genome shotgun sequence	1535	L1P1_orf2	nr	bacteria	|-__root|-__cellular_organisms|k__Bacteria|-__PVC_group|p__Chlamydiae|c__Chlamydiia|o__Chlamydiales|f__Chlamydiaceae|-__Chlamydia/Chlamydophila_group|g__Chlamydia|s__Chlamydia_abortus
NZ_FVQV01000023.1:1-169	gi|912671194|ref|WP_050225982.1|	100	56	0	0	1	168	11	66	6e-25	120.9	WP_050225982.1	MULTISPECIES: hypothetical protein [Terrabacteria group]	127	live	1783272	2015-08-05	2018-05-26		Terrabacteria group	Bacteria	11	NZ_CMHF01000071.1:322-705,NZ_CREL01000060.1:987-1370,NZ_CRTU01000070.1:493-876,NZ_FECI01000023.1:1507-1890,NZ_FSEY01000032.1:201-584,CMHF01000071.1:322-705,CREL01000060.1:987-1370,CRTU01000070.1:493-876,FECI01000023.1:1507-1890,GDIP01013326.1:161-544,GCES01121862.1:282-665	NZ_CMHF01000071.1	Streptococcus pneumoniae strain SMRU2967, whole genome shotgun sequence	1531	HSATII	nr	bacteria	|-__root|-__cellular_organisms|k__Bacteria|-__Terrabacteria_group
NZ_CMHG01000050.1:5-174	gi|802564556|embl|CFS61561.1|	98.21	56	1	0	1	168	22	77	5e-25	121.3	CFS61561.1	Uncharacterised protein [Mycobacterium tuberculosis]	80	live	1773	2015-03-15	2015-06-13		Mycobacterium tuberculosis	Bacteria	1	CGDU01000361.1:1207-1449	CGDU01000361.1	Mycobacterium tuberculosis genome assembly 5237_8#6, scaffold ERS013501SCcontig000361, whole genome shotgun sequence	1530	HSATII	nr	bacteria	|-__root|-__cellular_organisms|k__Bacteria|-__Terrabacteria_group|p__Actinobacteria|c__Actinobacteria|o__Corynebacteriales|f__Mycobacteriaceae|g__Mycobacterium|-__Mycobacterium_tuberculosis_complex|s__Mycobacterium_tuberculosis
NZ_FQLM01000003.1:4122-5041	gi|1190738090|embl|SFW07471.1|	96.19	236	9	0	918	211	136	371	3e-125	456.8	SFW07471.1	L1 transposable element [Chlamydia abortus]	371	live	83555	2017-05-10	2017-05-10		Chlamydia abortus	Bacteria	1	FPIG01000087.1:50-1165	FPIG01000087.1	Chlamydophila abortus strain AB7 genome assembly, contig: ERS177766SCcontig000087, whole genome shotgun sequence	1524	L1PBa_5end	nr	bacteria	|-__root|-__cellular_organisms|k__Bacteria|-__PVC_group|p__Chlamydiae|c__Chlamydiia|o__Chlamydiales|f__Chlamydiaceae|-__Chlamydia/Chlamydophila_group|g__Chlamydia|s__Chlamydia_abortus
NZ_JTBZ02000059.1:53-682	gi|1092422940|ref|WP_070433639.1|	98.91	183	2	0	82	630	1	183	2e-107	396.4	WP_070433639.1	DUF1725 domain-containing protein, partial [Corynebacterium sp. HMSC28B08]	183	live	1581066	2016-10-26	2017-07-07		Corynebacterium sp. HMSC28B08	Bacteria	3	NZ_KV786142.1:973-1522,KV786142.1:973-1522,LWOT01000014.1:973-1522	NZ_KV786142.1	Corynebacterium sp. HMSC28B08 Scaffold13, whole genome shotgun sequence	1522	L1HS_3end	nr	bacteria	|-__root|-__cellular_organisms|k__Bacteria|-__Terrabacteria_group|p__Actinobacteria|c__Actinobacteria|o__Corynebacteriales|f__Corynebacteriaceae|g__Corynebacterium|s__Corynebacterium_sp._HMSC28B08
NZ_APII01000010.1:1-1522	gi|733133418|gb|KHK25500.1|	100	507	0	0	1521	1	1	507	7e-297	1028.1	KHK25500.1	recombinase, partial [Listeria monocytogenes SHL009]	507	live	1302629	2014-12-15	2014-12-15		Listeria monocytogenes SHL009	Bacteria	1	APII01000010.1:1-1522	APII01000010.1	Listeria monocytogenes SHL009 contig10, whole genome shotgun sequence	1522	L1P1_orf2	nr	bacteria	|-__root|-__cellular_organisms|k__Bacteria|-__Terrabacteria_group|p__Firmicutes|c__Bacilli|o__Bacillales|f__Listeriaceae|g__Listeria|s__Listeria_monocytogenes|-__Listeria_monocytogenes_SHL009
NZ_FPIL01000018.1:1061-1512	gi|815045519|embl|CRH55801.1|	100	28	0	0	452	369	64	91	7e-08	64.7	CRH55801.1	Uncharacterised protein [Chlamydia trachomatis]	91	live	813	2015-04-22	2015-06-13		Chlamydia trachomatis	Bacteria	1	CVNU01000054.1:981-1256	CVNU01000054.1	Chlamydia trachomatis genome assembly 7501_6#59, scaffold ERS082928SCcontig000054, whole genome shotgun sequence	1521	L1HS_3end	nr	bacteria	|-__root|-__cellular_organisms|k__Bacteria|-__PVC_group|p__Chlamydiae|c__Chlamydiia|o__Chlamydiales|f__Chlamydiaceae|-__Chlamydia/Chlamydophila_group|g__Chlamydia|s__Chlamydia_trachomatis
NZ_QUZQ01000057.1:599-2658	gi|1170621592|embl|SMA49524.1|	100	284	0	0	852	1	1	284	3e-131	478.4	SMA49524.1	Retron-type reverse transcriptase [Klebsiella pneumoniae]	461	live	573	2017-03-29	2017-03-29		Klebsiella pneumoniae	Bacteria	1	FWPK01000056.1:79-1464	FWPK01000056.1	Klebsiella pneumoniae strain KP5M genome assembly, contig: gnlProkkacontig000056, whole genome shotgun sequence	1513	L1P1_orf2	nr	bacteria	|-__root|-__cellular_organisms|k__Bacteria|p__Proteobacteria|c__Gammaproteobacteria|o__Enterobacterales|f__Enterobacteriaceae|g__Klebsiella|s__Klebsiella_pneumoniae
NZ_AAXW01000149.1:126-292	gi|126617064|gb|EAZ87916.1|	100	49	0	0	158	12	1	49	5e-21	107.8	EAZ87916.1	hypothetical protein CY0110_00935 [Cyanothece sp. CCY0110]	49	live	391612	2007-03-06	2007-03-06		Cyanothece sp. CCY0110	Bacteria	1	AAXW01000149.1:134-283	AAXW01000149.1	Cyanothece sp. CCY0110 1101676644430, whole genome shotgun sequence	1513	HSATII	nr	bacteria	|-__root|-__cellular_organisms|k__Bacteria|-__Terrabacteria_group|-__Cyanobacteria/Melainabacteria_group|p__Cyanobacteria|-__Oscillatoriophycideae|o__Oscillatoriales|f__Cyanothecaceae|g__Cyanothece|s__Cyanothece_sp._CCY0110
NZ_PYQC01000331.1:125-294	gi|126617066|gb|EAZ87918.1|	97.78	45	1	0	36	170	1	45	1e-15	90.1	EAZ87918.1	hypothetical protein CY0110_00945, partial [Cyanothece sp. CCY0110]	56	live	391612	2007-03-06	2007-03-06		Cyanothece sp. CCY0110	Bacteria	1	AAXW01000149.1:1341-1513	AAXW01000149.1	Cyanothece sp. CCY0110 1101676644430, whole genome shotgun sequence	1513	HSATII	nr	bacteria	|-__root|-__cellular_organisms|k__Bacteria|-__Terrabacteria_group|-__Cyanobacteria/Melainabacteria_group|p__Cyanobacteria|-__Oscillatoriophycideae|o__Oscillatoriales|f__Cyanothecaceae|g__Cyanothece|s__Cyanothece_sp._CCY0110
NZ_AAXW01000149.1:841-1010	gi|495554418|ref|WP_008278997.1|	100	56	0	0	169	2	6	61	4e-26	124.8	WP_008278997.1	hypothetical protein [Cyanothece sp. CCY0110]	82	live	391612	2013-05-10	2013-06-05		Cyanothece sp. CCY0110	Bacteria	2	NZ_AAXW01000149.1:776-1024,AAXW01000149.1:776-1024	NZ_AAXW01000149.1	Cyanothece sp. CCY0110 1101676644430, whole genome shotgun sequence	1513	HSATII	nr	bacteria	|-__root|-__cellular_organisms|k__Bacteria|-__Terrabacteria_group|-__Cyanobacteria/Melainabacteria_group|p__Cyanobacteria|-__Oscillatoriophycideae|o__Oscillatoriales|f__Cyanothecaceae|g__Cyanothece|s__Cyanothece_sp._CCY0110
NZ_AWWQ01000013.1:130-815	gi|1275693533|ref|WP_099770137.1|	100	103	0	0	311	619	1	103	4e-55	222.6	WP_099770137.1	hypothetical protein [Listeria monocytogenes]	103	live	1639	2017-11-09	2017-11-09		Listeria monocytogenes	Bacteria	2	NZ_AWWQ01000013.1:440-751,AWWQ01000013.1:440-751	NZ_AWWQ01000013.1	Listeria monocytogenes SHL014 contig20, whole genome shotgun sequence	1507	L1HS_3end	nr	bacteria	|-__root|-__cellular_organisms|k__Bacteria|-__Terrabacteria_group|p__Firmicutes|c__Bacilli|o__Bacillales|f__Listeriaceae|g__Listeria|s__Listeria_monocytogenes
NZ_MPRK01000332.1:310-539	gi|1154101252|ref|WP_078477699.1|	100	76	0	0	230	3	24	99	2e-41	175.6	WP_078477699.1	hypothetical protein [Solemya pervernicosa gill symbiont]	132	live	642797	2017-03-09	2017-03-09		Solemya pervernicosa gill symbiont	Bacteria	2	NZ_MPRK01000332.1:210-608,MPRK01000332.1:210-608	NZ_MPRK01000332.1	Solemya pervernicosa gill symbiont isolate Sp-SM6 Selarraichensis_sym_scaffold337, whole genome shotgun sequence	1506	HSATII	nr	bacteria	|-__root|-__cellular_organisms|k__Bacteria|p__Proteobacteria|c__Gammaproteobacteria|-__unclassified_Gammaproteobacteria|-__sulfur-oxidizing_symbionts|s__Solemya_pervernicosa_gill_symbiont
NZ_CVNK01000004.1:3-1498	gi|809288478|embl|CRH43553.1|	100	202	0	0	142	747	1	202	9e-89	336.7	CRH43553.1	Uncharacterised protein [Chlamydia trachomatis]	202	live	813	2015-04-21	2015-06-14		Chlamydia trachomatis	Bacteria	1	CVNK01000004.1:144-752	CVNK01000004.1	Chlamydia trachomatis genome assembly 7396_3#10, scaffold ERS075185SCcontig000004, whole genome shotgun sequence	1499	L1P1_orf2	nr	bacteria	|-__root|-__cellular_organisms|k__Bacteria|-__PVC_group|p__Chlamydiae|c__Chlamydiia|o__Chlamydiales|f__Chlamydiaceae|-__Chlamydia/Chlamydophila_group|g__Chlamydia|s__Chlamydia_trachomatis
NZ_MEDC01000023.1:655-1493	gi|1120893374|ref|WP_073426530.1|	100	200	0	0	82	681	1	200	3e-118	433	WP_073426530.1	DUF1725 domain-containing protein [Bacillus licheniformis]	200	live	1402	2016-12-19	2017-07-09		Bacillus licheniformis	Bacteria	2	NZ_MEDC01000023.1:736-1338,MEDC01000023.1:736-1338	NZ_MEDC01000023.1	Bacillus licheniformis strain YNP3-TSU IGL323, whole genome shotgun sequence	1493	L1HS_3end	nr	bacteria	|-__root|-__cellular_organisms|k__Bacteria|-__Terrabacteria_group|p__Firmicutes|c__Bacilli|o__Bacillales|f__Bacillaceae|g__Bacillus|-__Bacillus_subtilis_group|s__Bacillus_licheniformis
NZ_PGWY01000426.1:1-156	gi|337292326|embl|CCB90360.1|	97.5	40	1	0	36	155	1	40	2e-12	79.3	CCB90360.1	unknown protein [Waddlia chondrophila 2032/99]	45	live	765953	2011-06-22	2016-07-25		Waddlia chondrophila 2032/99	Bacteria	1	FR872601.1:164-301	FR872601.1	Waddlia chondrophila 2032/99 annotated genome fragment, clone 1103163150235	1490	ALR	nr	bacteria	|-__root|-__cellular_organisms|k__Bacteria|-__PVC_group|p__Chlamydiae|c__Chlamydiia|o__Parachlamydiales|f__Waddliaceae|g__Waddlia|s__Waddlia_chondrophila|-__Waddlia_chondrophila_2032/99
NZ_UGRJ01000003.1:1130579-1131300	gi|1176466086|ref|WP_082298426.1|	100	172	0	0	207	722	1	172	5e-94	352.1	WP_082298426.1	hypothetical protein [Neisseria gonorrhoeae]	181	live	485	2017-04-11	2018-01-12		Neisseria gonorrhoeae	Bacteria	20	NZ_ATPG01000103.1:335-880,NZ_ATPI01000266.1:454-999,NZ_ATPV01000081.1:609-1154,NZ_ATQD01000082.1:578-1123,NZ_ATQX01000228.1:231-776,NZ_CP012027.1:692784-693329,NZ_EQ972671.1:24229-24774,NZ_EQ972718.1:24010-24555,NZ_EQ972957.1:24046-24591,NZ_FLLA01000002.1:132999-133544,NZ_MTGL01000023.1:235-780,NZ_OANR01000085.1:307-852,NZ_UGRJ01000003.1:1130785-1131330,CP012027.1:692784-693329,EQ972671.1:24229-2…	NZ_ATPG01000103.1	Neisseria gonorrhoeae SK6987 contig191, whole genome shotgun sequence	1489	L1HS_5end	nr	bacteria	|-__root|-__cellular_organisms|k__Bacteria|p__Proteobacteria|c__Betaproteobacteria|o__Neisseriales|f__Neisseriaceae|g__Neisseria|s__Neisseria_gonorrhoeae
NZ_CMKS01000111.1:5-175	gi|1037143710|embl|SBT56803.1|	98.21	56	1	0	169	2	59	114	1e-22	113.6	SBT56803.1	hypothetical protein POVWA1_078610 [Plasmodium ovale wallikeri]	158	live	864142	2016-06-16	2016-06-16		Plasmodium ovale wallikeri	Eukaryota	1	FLRD01001215.1:380-1367	FLRD01001215.1	Plasmodium ovale wallikeri genome assembly, contig: contig1215, whole genome shotgun sequence	1488	ALR	nr	bacteria	|-__root|-__cellular_organisms|k__Eukaryota|-__Alveolata|p__Apicomplexa|c__Aconoidasida|o__Haemosporida|f__Plasmodiidae|g__Plasmodium|-__Plasmodium_(Plasmodium)|s__Plasmodium_ovale|-__Plasmodium_ovale_wallikeri
NZ_QLAN01000102.1:85-854	gi|1376470421|ref|WP_107480574.1|	99.36	157	1	0	693	223	1	157	2e-91	344	WP_107480574.1	DUF1725 domain-containing protein [Streptomyces sp. alain-838]	157	live	2026340	2018-04-12	2018-04-17		Streptomyces sp. alain-838	Bacteria	2	NZ_NQNW01000509.1:899-1372,NQNW01000509.1:899-1372	NZ_NQNW01000509.1	Streptomyces sp. alain-838 NODE_509_length_1470_cov_0.0862454, whole genome shotgun sequence	1470	L1HS_3end	nr	bacteria	|-__root|-__cellular_organisms|k__Bacteria|-__Terrabacteria_group|p__Actinobacteria|c__Actinobacteria|o__Streptomycetales|f__Streptomycetaceae|g__Streptomyces|s__Streptomyces_sp._alain-838
NZ_PYQC01000120.1:1220-4510	gi|527189981|gb|EPS61417.1|	100	337	0	0	1	1011	1	337	4e-193	684.9	EPS61417.1	hypothetical protein M569_13379, partial [Genlisea aurea]	337	live	192259	2013-07-26	2013-07-26		Genlisea aurea	Eukaryota	2	AUSU01006866.1:1-1011,KE533501.1:1-1011	AUSU01006866.1	Genlisea aurea contig_11688, whole genome shotgun sequence	1470	L1P1_orf2	nr	bacteria	|-__root|-__cellular_organisms|k__Eukaryota|-__Viridiplantae|p__Streptophyta|-__Streptophytina|-__Embryophyta|-__Tracheophyta|-__Euphyllophyta|-__Spermatophyta|-__Magnoliophyta|-__Mesangiospermae|-__eudicotyledons|-__Gunneridae|-__Pentapetalae|-__asterids|-__lamiids|o__Lamiales|f__Lentibulariaceae|g__Genlisea|s__Genlisea_aurea
NZ_NCTS01000071.1:1-691	gi|527189982|gb|EPS61418.1|	100	131	0	0	83	475	1	131	2e-66	260.4	EPS61418.1	hypothetical protein M569_13380, partial [Genlisea aurea]	131	live	192259	2013-07-26	2013-07-26		Genlisea aurea	Eukaryota	2	AUSU01006866.1:1075-1470,KE533501.1:1075-1470	AUSU01006866.1	Genlisea aurea contig_11688, whole genome shotgun sequence	1470	L1HS_5end	nr	bacteria	|-__root|-__cellular_organisms|k__Eukaryota|-__Viridiplantae|p__Streptophyta|-__Streptophytina|-__Embryophyta|-__Tracheophyta|-__Euphyllophyta|-__Spermatophyta|-__Magnoliophyta|-__Mesangiospermae|-__eudicotyledons|-__Gunneridae|-__Pentapetalae|-__asterids|-__lamiids|o__Lamiales|f__Lentibulariaceae|g__Genlisea|s__Genlisea_aurea
NZ_APME01000129.1:415-1186	gi|1274398546|ref|WP_099584900.1|	98	200	4	0	83	682	1	200	7e-116	424.9	WP_099584900.1	DUF1725 domain-containing protein [Pseudomonas sp. 2822-17]	200	live	1712678	2017-11-05	2017-11-13		Pseudomonas sp. 2822-17	Bacteria	2	NZ_LJRZ01000403.1:95-697,LJRZ01000403.1:95-697	NZ_LJRZ01000403.1	Pseudomonas sp. 2822-17 contig_440, whole genome shotgun sequence	1463	L1HS_3end	nr	bacteria	|-__root|-__cellular_organisms|k__Bacteria|p__Proteobacteria|c__Gammaproteobacteria|o__Pseudomonadales|f__Pseudomonadaceae|g__Pseudomonas|s__Pseudomonas_sp._2822-17
NZ_CANR01000100.1:1-1160	gi|1274398547|ref|WP_099584901.1|	98.68	151	2	0	606	1058	3	153	6e-83	316.6	WP_099584901.1	hypothetical protein [Pseudomonas sp. 2822-17]	153	live	1712678	2017-11-05	2017-11-05		Pseudomonas sp. 2822-17	Bacteria	2	NZ_LJRZ01000403.1:740-1201,LJRZ01000403.1:740-1201	NZ_LJRZ01000403.1	Pseudomonas sp. 2822-17 contig_440, whole genome shotgun sequence	1463	L1P1_orf2	nr	bacteria	|-__root|-__cellular_organisms|k__Bacteria|p__Proteobacteria|c__Gammaproteobacteria|o__Pseudomonadales|f__Pseudomonadaceae|g__Pseudomonas|s__Pseudomonas_sp._2822-17
NZ_PGWY01000426.1:157-299	gi|337292235|embl|CCB90282.1|	97.5	40	1	0	5	124	14	53	1e-14	86.7	CCB90282.1	unknown protein [Waddlia chondrophila 2032/99]	53	live	765953	2011-06-22	2016-07-25		Waddlia chondrophila 2032/99	Bacteria	1	FR872587.1:367-528	FR872587.1	Waddlia chondrophila 2032/99 annotated genome fragment, clone 1103163150215	1462	ALR	nr	bacteria	|-__root|-__cellular_organisms|k__Bacteria|-__PVC_group|p__Chlamydiae|c__Chlamydiia|o__Parachlamydiales|f__Waddliaceae|g__Waddlia|s__Waddlia_chondrophila|-__Waddlia_chondrophila_2032/99
NZ_NXKE01000226.1:113-284	gi|337292236|embl|CCB90283.1|	95.45	44	2	0	2	133	30	73	5e-16	91.3	CCB90283.1	hypothetical protein WCH_DE19710 [Waddlia chondrophila 2032/99]	73	live	765953	2011-06-22	2016-07-25		Waddlia chondrophila 2032/99	Bacteria	1	FR872587.1:579-800	FR872587.1	Waddlia chondrophila 2032/99 annotated genome fragment, clone 1103163150215	1462	ALR	nr	bacteria	|-__root|-__cellular_organisms|k__Bacteria|-__PVC_group|p__Chlamydiae|c__Chlamydiia|o__Parachlamydiales|f__Waddliaceae|g__Waddlia|s__Waddlia_chondrophila|-__Waddlia_chondrophila_2032/99
NZ_FALI01000148.1:1-160	gi|1179645857|embl|SME41360.1|	100	52	0	0	156	1	1	52	9e-21	107.1	SME41360.1	Uncharacterised protein [Klebsiella pneumoniae]	163	live	573	2017-04-13	2017-04-13		Klebsiella pneumoniae	Bacteria	1	FWYR01000065.1:652-1143	FWYR01000065.1	Klebsiella pneumoniae isolate KP03M genome assembly, contig: gnlProkkacontig000065, whole genome shotgun sequence	1459	HSATII	nr	bacteria	|-__root|-__cellular_organisms|k__Bacteria|p__Proteobacteria|c__Gammaproteobacteria|o__Enterobacterales|f__Enterobacteriaceae|g__Klebsiella|s__Klebsiella_pneumoniae
NZ_QNUV01000083.1:183-344	gi|1184644938|ref|WP_085205620.1|	100	53	0	0	161	3	45	97	3e-23	115.5	WP_085205620.1	hypothetical protein, partial [Klebsiella pneumoniae]	113	live	573	2017-04-22	2018-01-11		Klebsiella pneumoniae	Bacteria	1	NZ_FWYR01000065.1:1-339	NZ_FWYR01000065.1	Klebsiella pneumoniae isolate KP03M, whole genome shotgun sequence	1459	HSATII	nr	bacteria	|-__root|-__cellular_organisms|k__Bacteria|p__Proteobacteria|c__Gammaproteobacteria|o__Enterobacterales|f__Enterobacteriaceae|g__Klebsiella|s__Klebsiella_pneumoniae
NZ_LZSF01000266.1:234-403	gi|895651684|embl|CNX51949.1|	98.21	56	1	0	1	168	40	95	7e-27	127.5	CNX51949.1	Uncharacterised protein [Mycobacterium tuberculosis]	163	live	1773	2015-03-23	2015-06-14		Mycobacterium tuberculosis	Bacteria	1	CQSC01000258.1:288-779	CQSC01000258.1	Mycobacterium tuberculosis genome assembly 5227_6#11, scaffold ERS013440SCcontig000258, whole genome shotgun sequence	1454	HSATII	nr	bacteria	|-__root|-__cellular_organisms|k__Bacteria|-__Terrabacteria_group|p__Actinobacteria|c__Actinobacteria|o__Corynebacteriales|f__Mycobacteriaceae|g__Mycobacterium|-__Mycobacterium_tuberculosis_complex|s__Mycobacterium_tuberculosis
NZ_QLYU01000051.1:700-865	gi|895651685|embl|CNX51972.1|	100	52	0	0	10	165	1	52	1e-22	113.6	CNX51972.1	Uncharacterised protein [Mycobacterium tuberculosis]	53	live	1773	2015-03-23	2015-06-14		Mycobacterium tuberculosis	Bacteria	7	CQSC01000258.1:731-892,CQTE01000271.1:529-690,CRZK01000831.1:261-422,FSEY01000032.1:1148-1309,FSLH01000039.1:192-353,FVQV01000023.1:918-1079,FVQX01000030.1:457-618	CQSC01000258.1	Mycobacterium tuberculosis genome assembly 5227_6#11, scaffold ERS013440SCcontig000258, whole genome shotgun sequence	1454	HSATII	nr	bacteria	|-__root|-__cellular_organisms|k__Bacteria|-__Terrabacteria_group|p__Actinobacteria|c__Actinobacteria|o__Corynebacteriales|f__Mycobacteriaceae|g__Mycobacterium|-__Mycobacterium_tuberculosis_complex|s__Mycobacterium_tuberculosis
NZ_QUZQ01000057.1:599-2658	gi|1179650992|embl|SME60873.1|	100	284	0	0	852	1	1	284	1e-131	479.6	SME60873.1	Retron-type reverse transcriptase [Klebsiella pneumoniae]	461	live	573	2017-04-13	2017-04-13		Klebsiella pneumoniae	Bacteria	1	FWZI01000054.1:60-1445	FWZI01000054.1	Klebsiella pneumoniae strain KP06M genome assembly, contig: gnlProkkacontig000054, whole genome shotgun sequence	1451	L1P1_orf2	nr	bacteria	|-__root|-__cellular_organisms|k__Bacteria|p__Proteobacteria|c__Gammaproteobacteria|o__Enterobacterales|f__Enterobacteriaceae|g__Klebsiella|s__Klebsiella_pneumoniae
NZ_KE356200.1:18-187	gi|514672232|gb|EPJ27442.1|	100	31	0	0	2	94	7	37	6e-09	67.8	EPJ27442.1	hypothetical protein CPC1998_1145, partial [Chlamydia psittaci C19/98]	37	live	1112250	2013-06-25	2013-06-25		Chlamydia psittaci C19/98	Bacteria	2	ATLD01000024.1:1-114,KE356200.1:1-114	ATLD01000024.1	Chlamydia psittaci C19/98 CP_C19_98.contig.71_1, whole genome shotgun sequence	1439	ALR	nr	bacteria	|-__root|-__cellular_organisms|k__Bacteria|-__PVC_group|p__Chlamydiae|c__Chlamydiia|o__Chlamydiales|f__Chlamydiaceae|-__Chlamydia/Chlamydophila_group|g__Chlamydia|s__Chlamydia_psittaci|-__Chlamydia_psittaci_C19/98
NZ_FPIJ01000021.1:422-824	gi|1196979763|ref|WP_086400421.1|	100	127	0	0	402	22	37	163	5e-68	264.2	WP_086400421.1	DUF1725 domain-containing protein [Chlamydia abortus]	163	live	83555	2017-05-24	2017-07-07		Chlamydia abortus	Bacteria	1	NZ_FPIJ01000021.1:440-931	NZ_FPIJ01000021.1	Chlamydia abortus strain T20, whole genome shotgun sequence	1438	L1HS_3end	nr	bacteria	|-__root|-__cellular_organisms|k__Bacteria|-__PVC_group|p__Chlamydiae|c__Chlamydiia|o__Chlamydiales|f__Chlamydiaceae|-__Chlamydia/Chlamydophila_group|g__Chlamydia|s__Chlamydia_abortus
NZ_FVQX01000030.1:1172-1340	gi|1148640994|ref|WP_077385521.1|	100	52	0	0	169	14	76	127	2e-23	115.9	WP_077385521.1	hypothetical protein [Mycobacterium tuberculosis]	127	live	1773	2017-02-20	2017-02-20		Mycobacterium tuberculosis	Bacteria	1	NZ_FUFS01000256.1:1045-1428	NZ_FUFS01000256.1	Mycobacterium tuberculosis isolate MTB20_M, whole genome shotgun sequence	1435	HSATII	nr	bacteria	|-__root|-__cellular_organisms|k__Bacteria|-__Terrabacteria_group|p__Actinobacteria|c__Actinobacteria|o__Corynebacteriales|f__Mycobacteriaceae|g__Mycobacterium|-__Mycobacterium_tuberculosis_complex|s__Mycobacterium_tuberculosis
NZ_AMQR01000150.1:1-157	gi|970218440|dbj|GAQ77538.1|	98.08	52	1	0	1	156	10	61	1e-23	116.7	GAQ77538.1	hypothetical protein T45_09357 [Streptomyces turgidiscabies]	72	live	85558	2015-12-23	2016-04-09		Streptomyces turgidiscabies	Bacteria	1	BCMN01000073.1:277-495	BCMN01000073.1	Streptomyces turgidiscabies DNA, scaffold: NODE_073_cov_5.8555, strain: T45, whole genome shotgun sequence	1434	HSATII	nr	bacteria	|-__root|-__cellular_organisms|k__Bacteria|-__Terrabacteria_group|p__Actinobacteria|c__Actinobacteria|o__Streptomycetales|f__Streptomycetaceae|g__Streptomyces|s__Streptomyces_turgidiscabies
NZ_MOHL01000114.1:190-360	gi|1112338658|gb|OJN70935.1|	100	57	0	0	1	171	28	84	7e-24	117.5	OJN70935.1	hypothetical protein BK309_26670 [Escherichia coli]	118	live	562	2016-12-08	2016-12-08		Escherichia coli	Bacteria	1	MOHL01000114.1:109-465	MOHL01000114.1	Escherichia coli strain 626 BN4_626_1_(paired)_contig_116, whole genome shotgun sequence	1426	ALR	nr	bacteria	|-__root|-__cellular_organisms|k__Bacteria|p__Proteobacteria|c__Gammaproteobacteria|o__Enterobacterales|f__Enterobacteriaceae|g__Escherichia|s__Escherichia_coli
NZ_MOHL01000114.1:190-360	gi|1119739572|ref|WP_072651139.1|	100	57	0	0	1	171	22	78	7e-24	117.5	WP_072651139.1	hypothetical protein [Escherichia coli]	112	live	562	2016-12-18	2016-12-18		Escherichia coli	Bacteria	1	NZ_MOHL01000114.1:127-465	NZ_MOHL01000114.1	Escherichia coli strain 626 BN4_626_1__paired__contig_116, whole genome shotgun sequence	1426	ALR	nr	bacteria	|-__root|-__cellular_organisms|k__Bacteria|p__Proteobacteria|c__Gammaproteobacteria|o__Enterobacterales|f__Enterobacteriaceae|g__Escherichia|s__Escherichia_coli
NZ_MOHL01000114.1:1040-1210	gi|1119739573|ref|WP_072651140.1|	100	57	0	0	1	171	2	58	3e-23	115.5	WP_072651140.1	hypothetical protein [Escherichia coli]	92	live	562	2016-12-18	2016-12-18		Escherichia coli	Bacteria	2	NZ_MOHL01000114.1:1037-1315,MOHL01000114.1:1037-1315	NZ_MOHL01000114.1	Escherichia coli strain 626 BN4_626_1__paired__contig_116, whole genome shotgun sequence	1426	ALR	nr	bacteria	|-__root|-__cellular_organisms|k__Bacteria|p__Proteobacteria|c__Gammaproteobacteria|o__Enterobacterales|f__Enterobacteriaceae|g__Escherichia|s__Escherichia_coli
NZ_FVQV01000023.1:1-169	gi|912679165|ref|WP_050229787.1|	98.21	56	1	0	1	168	11	66	3e-24	118.6	WP_050229787.1	hypothetical protein [Streptococcus pneumoniae]	127	live	1313	2015-08-05	2018-01-11		Streptococcus pneumoniae	Bacteria	1	NZ_CLUK01000053.1:729-1112	NZ_CLUK01000053.1	Streptococcus pneumoniae strain SMRU2222, whole genome shotgun sequence	1426	HSATII	nr	bacteria	|-__root|-__cellular_organisms|k__Bacteria|-__Terrabacteria_group|p__Firmicutes|c__Bacilli|o__Lactobacillales|f__Streptococcaceae|g__Streptococcus|s__Streptococcus_pneumoniae
NZ_LMDS01000003.1:699-870	gi|1347318700|gb|PPQ23603.1|	100	53	0	0	172	14	11	63	1e-22	113.2	PPQ23603.1	hypothetical protein C4888_11105, partial [Streptococcus agalactiae]	63	live	1311	2018-02-21	2018-02-21		Streptococcus agalactiae	Bacteria	1	PTJK01000052.1:1-194	PTJK01000052.1	Streptococcus agalactiae strain PR10 scaffold_51, whole genome shotgun sequence	1420	HSATII	nr	bacteria	|-__root|-__cellular_organisms|k__Bacteria|-__Terrabacteria_group|p__Firmicutes|c__Bacilli|o__Lactobacillales|f__Streptococcaceae|g__Streptococcus|s__Streptococcus_agalactiae
NZ_QNUV01000083.1:183-344	gi|1348982400|ref|WP_104483835.1|	100	53	0	0	161	3	45	97	1e-22	113.2	WP_104483835.1	hypothetical protein, partial [Streptococcus agalactiae]	100	live	1311	2018-02-24	2018-02-24		Streptococcus agalactiae	Bacteria	2	NZ_PTJK01000052.1:1119-1420,PTJK01000052.1:1119-1420	NZ_PTJK01000052.1	Streptococcus agalactiae strain PR10 scaffold_51, whole genome shotgun sequence	1420	HSATII	nr	bacteria	|-__root|-__cellular_organisms|k__Bacteria|-__Terrabacteria_group|p__Firmicutes|c__Bacilli|o__Lactobacillales|f__Streptococcaceae|g__Streptococcus|s__Streptococcus_agalactiae
NZ_JPWZ01000242.1:124-287	gi|1117501698|embl|SIH61745.1|	100	52	0	0	7	162	1	52	4e-22	111.7	SIH61745.1	Uncharacterised protein [Mycobacteroides abscessus subsp. abscessus]	58	live	1185650	2016-12-14	2016-12-14		Mycobacteroides abscessus subsp. abscessus	Bacteria	2	FSLH01000033.1:437-613,FTZV01000200.1:299-475	FSLH01000033.1	Mycobacterium abscessus subsp. abscessus strain 1082 genome assembly, contig: ERS383203SCcontig000033, whole genome shotgun sequence	1417	HSATII	nr	bacteria	|-__root|-__cellular_organisms|k__Bacteria|-__Terrabacteria_group|p__Actinobacteria|c__Actinobacteria|o__Corynebacteriales|f__Mycobacteriaceae|g__Mycobacteroides|s__Mycobacteroides_abscessus|-__Mycobacteroides_abscessus_subsp._abscessus
NZ_FKIM01000402.1:130-826	gi|1224378728|ref|WP_092403739.1|	100	176	0	0	3	530	8	183	1e-94	354.4	WP_092403739.1	hypothetical protein [bacterium 2013Ark19i]	183	live	1561004	2017-07-29	2017-07-29		bacterium 2013Ark19i	Bacteria	1	NZ_FKIM01000402.1:111-662	NZ_FKIM01000402.1	Bacterium 2013Ark19i isolate 2013Arg12B, whole genome shotgun sequence	1411	L1P1_orf2	nr	bacteria	|-__root|-__cellular_organisms|k__Bacteria|-__unclassified_Bacteria|-__unclassified_Bacteria_(miscellaneous)|s__bacterium_2013Ark19i
NZ_QNUV01000083.1:183-344	gi|1174840196|ref|WP_081520885.1|	100	53	0	0	161	3	45	97	4e-21	108.2	WP_081520885.1	hypothetical protein, partial [Pseudomonas sp. T]	112	live	1938440	2017-04-08	2017-04-08		Pseudomonas sp. T	Bacteria	2	NZ_MUHV01000022.1:1-338,MUHV01000022.1:1-338	NZ_MUHV01000022.1	Pseudomonas sp. T sc_022, whole genome shotgun sequence	1410	HSATII	nr	bacteria	|-__root|-__cellular_organisms|k__Bacteria|p__Proteobacteria|c__Gammaproteobacteria|o__Pseudomonadales|f__Pseudomonadaceae|g__Pseudomonas|s__Pseudomonas_sp._T
NZ_FXYJ02000037.1:183-353	gi|1037156439|embl|SBT56357.1|	96.49	57	2	0	171	1	2	58	3e-21	108.6	SBT56357.1	hypothetical protein POVWA2_073140 [Plasmodium ovale wallikeri]	132	live	864142	2016-06-16	2016-06-16		Plasmodium ovale wallikeri	Eukaryota	1	FLRE01001344.1:1-1403	FLRE01001344.1	Plasmodium ovale wallikeri genome assembly, contig: contig1344, whole genome shotgun sequence	1403	ALR	nr	bacteria	|-__root|-__cellular_organisms|k__Eukaryota|-__Alveolata|p__Apicomplexa|c__Aconoidasida|o__Haemosporida|f__Plasmodiidae|g__Plasmodium|-__Plasmodium_(Plasmodium)|s__Plasmodium_ovale|-__Plasmodium_ovale_wallikeri
NZ_FTZV01000294.1:1314-3058	gi|1162505190|ref|WP_079869109.1|	98.61	72	1	0	432	217	1	72	3e-31	146	WP_079869109.1	hypothetical protein [Pseudomonas aeruginosa]	72	live	287	2017-03-21	2017-03-21		Pseudomonas aeruginosa	Bacteria	1	NZ_FRWQ01000309.1:39-257	NZ_FRWQ01000309.1	Pseudomonas aeruginosa isolate LRJ07, whole genome shotgun sequence	1385	L1HS_5end	nr	bacteria	|-__root|-__cellular_organisms|k__Bacteria|p__Proteobacteria|c__Gammaproteobacteria|o__Pseudomonadales|f__Pseudomonadaceae|g__Pseudomonas|-__Pseudomonas_aeruginosa_group|s__Pseudomonas_aeruginosa
NZ_NWDW01000102.1:1223-1384	gi|1327630343|ref|WP_102033236.1|	100	53	0	0	2	160	60	112	5e-24	117.9	WP_102033236.1	hypothetical protein, partial [Klebsiella pneumoniae]	112	live	573	2018-01-11	2018-01-11		Klebsiella pneumoniae	Bacteria	1	NZ_NWDW01000102.1:1047-1384	NZ_NWDW01000102.1	Klebsiella pneumoniae subsp. pneumoniae strain WCHKP020111 NODE_103_length_1384_cov_8.20948, whole genome shotgun sequence	1384	HSATII	nr	bacteria	|-__root|-__cellular_organisms|k__Bacteria|p__Proteobacteria|c__Gammaproteobacteria|o__Enterobacterales|f__Enterobacteriaceae|g__Klebsiella|s__Klebsiella_pneumoniae
NZ_QNUV01000083.1:183-344	gi|1388999218|ref|WP_109024053.1|	98.11	53	1	0	161	3	45	97	3e-23	115.5	WP_109024053.1	hypothetical protein, partial [Proteus mirabilis]	123	live	584	2018-05-12	2018-05-12		Proteus mirabilis	Bacteria	1	NZ_BFCK01000542.1:1-370	NZ_BFCK01000542.1	Proteus mirabilis strain MH13-009N, whole genome shotgun sequence	1383	HSATII	nr	bacteria	|-__root|-__cellular_organisms|k__Bacteria|p__Proteobacteria|c__Gammaproteobacteria|o__Enterobacterales|f__Morganellaceae|g__Proteus|s__Proteus_mirabilis
NZ_PYPV01000107.1:1284-1454	gi|695743590|ref|WP_032669889.1|	100	40	0	0	171	52	25	64	7e-16	90.9	WP_032669889.1	hypothetical protein [Enterobacter cloacae]	64	live	550	2014-10-09	2014-10-09		Enterobacter cloacae	Bacteria	1	NZ_ATCK01000019.1:1077-1271	NZ_ATCK01000019.1	Enterobacter cloacae str. Hanford ctg27, whole genome shotgun sequence	1372	ALR	nr	bacteria	|-__root|-__cellular_organisms|k__Bacteria|p__Proteobacteria|c__Gammaproteobacteria|o__Enterobacterales|f__Enterobacteriaceae|g__Enterobacter|-__Enterobacter_cloacae_complex|s__Enterobacter_cloacae
NZ_JPWZ01000196.1:1-1359	gi|1024208201|gb|KZW98177.1|	100	452	0	0	3	1358	1	452	4e-265	922.2	KZW98177.1	endonuclease, partial [Pseudoalteromonas luteoviolacea]	452	live	43657	2016-04-28	2016-04-28		Pseudoalteromonas luteoviolacea	Bacteria	1	JPWZ01000196.1:1-1359	JPWZ01000196.1	Pseudoalteromonas luteoviolacea strain NCIMB 2035 contig0199, whole genome shotgun sequence	1359	L1P1_orf2	nr	bacteria	|-__root|-__cellular_organisms|k__Bacteria|p__Proteobacteria|c__Gammaproteobacteria|o__Alteromonadales|f__Pseudoalteromonadaceae|g__Pseudoalteromonas|s__Pseudoalteromonas_luteoviolacea
NZ_FQSZ01000002.1:6603-7541	gi|1168804008|ref|WP_080373948.1|	100	227	0	0	259	939	1	227	5e-135	489.2	WP_080373948.1	DUF1725 domain-containing protein [Chlamydia trachomatis]	403	live	813	2017-03-26	2017-07-08		Chlamydia trachomatis	Bacteria	3	NZ_CVNI01000002.1:141-1352,CVNI01000002.1:141-1352,CVNK01000005.1:129-1340	NZ_CVNI01000002.1	Chlamydia trachomatis strain R32100IMS, whole genome shotgun sequence	1355	L1P1_orf2	nr	bacteria	|-__root|-__cellular_organisms|k__Bacteria|-__PVC_group|p__Chlamydiae|c__Chlamydiia|o__Chlamydiales|f__Chlamydiaceae|-__Chlamydia/Chlamydophila_group|g__Chlamydia|s__Chlamydia_trachomatis
NZ_CVNK01000005.1:111-809	gi|950129159|ref|WP_057184889.1|	100	156	0	0	489	22	1	156	2e-90	339.7	WP_057184889.1	DUF1725 domain-containing protein [Chlamydia trachomatis]	156	live	813	2015-11-09	2017-07-08		Chlamydia trachomatis	Bacteria	3	NZ_CVNI01000002.1:882-1352,NZ_CVNJ01000005.1:1123-1593,NZ_CVNK01000005.1:129-599	NZ_CVNI01000002.1	Chlamydia trachomatis strain R32100IMS, whole genome shotgun sequence	1355	L1HS_3end	nr	bacteria	|-__root|-__cellular_organisms|k__Bacteria|-__PVC_group|p__Chlamydiae|c__Chlamydiia|o__Chlamydiales|f__Chlamydiaceae|-__Chlamydia/Chlamydophila_group|g__Chlamydia|s__Chlamydia_trachomatis
NZ_JHBZ01000074.1:1-1352	gi|620691355|gb|KAK51464.1|	100	450	0	0	1351	2	1	450	1e-259	903.7	KAK51464.1	RNA-directed DNA polymerase domain protein, partial [Bordetella bronchiseptica OSU054]	450	live	1331254	2014-04-29	2014-04-29		Bordetella bronchiseptica OSU054	Bacteria	1	JHBZ01000074.1:1-1352	JHBZ01000074.1	Bordetella bronchiseptica OSU054 ctg7180000005053, whole genome shotgun sequence	1352	L1P1_orf2	nr	bacteria	|-__root|-__cellular_organisms|k__Bacteria|p__Proteobacteria|c__Betaproteobacteria|o__Burkholderiales|f__Alcaligenaceae|g__Bordetella|s__Bordetella_bronchiseptica|-__Bordetella_bronchiseptica_OSU054
NZ_LZSE01000010.1:1742-5035	gi|1133092296|gb|OMD84010.1|	98.52	135	2	0	112	516	1	135	7e-69	271.9	OMD84010.1	hypothetical protein BSK67_30130, partial [Paenibacillus odorifer]	135	live	189426	2017-01-18	2017-01-18		Paenibacillus odorifer	Bacteria	1	MPTK01000067.1:1-406	MPTK01000067.1	Paenibacillus odorifer strain FSL H3-0287 NODE_67_length_1350_cov_0.068745_ID_6839, whole genome shotgun sequence	1350	L1P1_orf2	nr	bacteria	|-__root|-__cellular_organisms|k__Bacteria|-__Terrabacteria_group|p__Firmicutes|c__Bacilli|o__Bacillales|f__Paenibacillaceae|g__Paenibacillus|s__Paenibacillus_odorifer
NZ_MTHW01000256.1:484-1176	gi|1187940513|gb|OSS25183.1|	98.21	224	4	0	1	672	126	349	6e-129	468	OSS25183.1	hypothetical protein BV338_05672 [Pseudomonas syringae pv. actinidiae]	349	live	103796	2017-04-28	2017-04-28		Pseudomonas syringae pv. actinidiae	Bacteria	1	MTIB01000255.1:159-1208	MTIB01000255.1	Pseudomonas syringae pv. actinidiae strain C62 BV338_255, whole genome shotgun sequence	1350	L1HS_3end	nr	bacteria	|-__root|-__cellular_organisms|k__Bacteria|p__Proteobacteria|c__Gammaproteobacteria|o__Pseudomonadales|f__Pseudomonadaceae|g__Pseudomonas|-__Pseudomonas_syringae_group|-__Pseudomonas_syringae_group_genomosp._1|s__Pseudomonas_syringae|-__Pseudomonas_syringae_group_pathovars_incertae_sedis|-__Pseudomonas_syringae_pv._actinidiae
NZ_MTIB01000255.1:534-1230	gi|1203208286|ref|WP_087675668.1|	100	169	0	0	166	672	1	169	5e-98	365.2	WP_087675668.1	DUF1725 domain-containing protein [Pseudomonas syringae]	169	live	317	2017-06-09	2017-07-08		Pseudomonas syringae	Bacteria	1	NZ_MTIB01000255.1:699-1208	NZ_MTIB01000255.1	Pseudomonas syringae pv. actinidiae strain C62 BV338_255, whole genome shotgun sequence	1350	L1HS_3end	nr	bacteria	|-__root|-__cellular_organisms|k__Bacteria|p__Proteobacteria|c__Gammaproteobacteria|o__Pseudomonadales|f__Pseudomonadaceae|g__Pseudomonas|-__Pseudomonas_syringae_group|-__Pseudomonas_syringae_group_genomosp._1|s__Pseudomonas_syringae
NZ_FTRP01000041.1:93-263	gi|1037143537|embl|SBT56988.1|	98.08	52	1	0	3	158	50	101	5e-19	101.3	SBT56988.1	hypothetical protein POVWA1_079450 [Plasmodium ovale wallikeri]	160	live	864142	2016-06-16	2016-06-16		Plasmodium ovale wallikeri	Eukaryota	1	FLRD01001310.1:35-941	FLRD01001310.1	Plasmodium ovale wallikeri genome assembly, contig: contig1310, whole genome shotgun sequence	1349	ALR	nr	bacteria	|-__root|-__cellular_organisms|k__Eukaryota|-__Alveolata|p__Apicomplexa|c__Aconoidasida|o__Haemosporida|f__Plasmodiidae|g__Plasmodium|-__Plasmodium_(Plasmodium)|s__Plasmodium_ovale|-__Plasmodium_ovale_wallikeri
NZ_FQLM01000003.1:5271-5872	gi|1190721080|embl|SFW05032.1|	100	30	0	0	241	330	97	126	3e-08	66.6	SFW05032.1	Uncharacterised protein [Chlamydia abortus]	126	live	83555	2017-05-10	2017-05-10		Chlamydia abortus	Bacteria	1	FPIK01000029.1:40-420	FPIK01000029.1	Chlamydophila abortus strain 83/12 genome assembly, contig: ERS003312SCcontig000029, whole genome shotgun sequence	1346	L1PBa_5end	nr	bacteria	|-__root|-__cellular_organisms|k__Bacteria|-__PVC_group|p__Chlamydiae|c__Chlamydiia|o__Chlamydiales|f__Chlamydiaceae|-__Chlamydia/Chlamydophila_group|g__Chlamydia|s__Chlamydia_abortus
NZ_FQLK01000004.1:94-712	gi|1203192433|ref|WP_087672107.1|	100	128	0	0	2	385	144	271	4e-65	255.4	WP_087672107.1	hypothetical protein [Chlamydia abortus]	290	live	83555	2017-06-09	2017-06-09		Chlamydia abortus	Bacteria	2	NZ_FPIK01000029.1:262-1134,FPIK01000029.1:262-1134	NZ_FPIK01000029.1	Chlamydia abortus strain 83/12, whole genome shotgun sequence	1346	L1PBa_5end	nr	bacteria	|-__root|-__cellular_organisms|k__Bacteria|-__PVC_group|p__Chlamydiae|c__Chlamydiia|o__Chlamydiales|f__Chlamydiaceae|-__Chlamydia/Chlamydophila_group|g__Chlamydia|s__Chlamydia_abortus
NZ_MTQH01000263.1:1-736	gi|1197559509|ref|WP_086598212.1|	100	200	0	0	655	56	1	200	1e-118	434.1	WP_086598212.1	DUF1725 domain-containing protein [Acinetobacter baumannii]	200	live	470	2017-05-24	2017-07-08		Acinetobacter baumannii	Bacteria	2	NZ_MTQH01000263.1:53-655,MTQH01000263.1:53-655	NZ_MTQH01000263.1	Acinetobacter baumannii strain AbS2 C1-D7-12 NAD-ColR-redeposit_S98_R1__paired__contig_271, whole genome shotgun sequence	1343	L1HS_3end	nr	bacteria	|-__root|-__cellular_organisms|k__Bacteria|p__Proteobacteria|c__Gammaproteobacteria|o__Pseudomonadales|f__Moraxellaceae|g__Acinetobacter|-__Acinetobacter_calcoaceticus/baumannii_complex|s__Acinetobacter_baumannii
NZ_JTEB01000077.1:1-1340	gi|1049778568|gb|OCR49273.1|	100	446	0	0	1340	3	1	446	2e-256	893.3	OCR49273.1	endonuclease, partial [Klebsiella pneumoniae]	446	live	573	2016-08-05	2016-08-05		Klebsiella pneumoniae	Bacteria	1	JTEB01000077.1:1-1340	JTEB01000077.1	Klebsiella pneumoniae strain XH212 contig-100_83, whole genome shotgun sequence	1340	L1P1_orf2	nr	bacteria	|-__root|-__cellular_organisms|k__Bacteria|p__Proteobacteria|c__Gammaproteobacteria|o__Enterobacterales|f__Enterobacteriaceae|g__Klebsiella|s__Klebsiella_pneumoniae
NZ_FTKO01000193.1:31-1340	gi|1125780048|embl|SIP66023.1|	99.62	263	1	0	1005	217	1	263	3e-144	520.8	SIP66023.1	hypothetical protein BN9982_2720002 [Mycobacterium tuberculosis]	263	live	1773	2016-12-26	2016-12-26		Mycobacterium tuberculosis	Bacteria	1	FTKO01000193.1:244-1035	FTKO01000193.1	Mycobacterium tuberculosis strain MTB13_M genome assembly, contig: BN9982_Contig_272, whole genome shotgun sequence	1340	L1HS_5end	nr	bacteria	|-__root|-__cellular_organisms|k__Bacteria|-__Terrabacteria_group|p__Actinobacteria|c__Actinobacteria|o__Corynebacteriales|f__Mycobacteriaceae|g__Mycobacterium|-__Mycobacterium_tuberculosis_complex|s__Mycobacterium_tuberculosis
NZ_QEMK01000180.1:1-723	gi|1184599168|ref|WP_085163654.1|	100	114	0	0	513	172	1	114	5e-67	262.3	WP_085163654.1	hypothetical protein, partial [Klebsiella pneumoniae]	114	live	573	2017-04-22	2017-04-22		Klebsiella pneumoniae	Bacteria	1	NZ_FWYP01000097.1:999-1340	NZ_FWYP01000097.1	Klebsiella pneumoniae strain Kp04_M isolate Kp4, whole genome shotgun sequence	1340	L1HS_3end	nr	bacteria	|-__root|-__cellular_organisms|k__Bacteria|p__Proteobacteria|c__Gammaproteobacteria|o__Enterobacterales|f__Enterobacteriaceae|g__Klebsiella|s__Klebsiella_pneumoniae
NZ_FUFS01000281.1:341-507	gi|1037153959|embl|SBT58860.1|	97.62	42	1	0	3	128	38	79	1e-13	83.2	SBT58860.1	hypothetical protein POVWA2_088610 [Plasmodium ovale wallikeri]	79	live	864142	2016-06-16	2016-06-16		Plasmodium ovale wallikeri	Eukaryota	1	FLRE01002615.1:453-692	FLRE01002615.1	Plasmodium ovale wallikeri genome assembly, contig: contig2615, whole genome shotgun sequence	1336	ALR	nr	bacteria	|-__root|-__cellular_organisms|k__Eukaryota|-__Alveolata|p__Apicomplexa|c__Aconoidasida|o__Haemosporida|f__Plasmodiidae|g__Plasmodium|-__Plasmodium_(Plasmodium)|s__Plasmodium_ovale|-__Plasmodium_ovale_wallikeri
NZ_FPMM01000013.1:64-707	gi|1196970664|ref|WP_086393178.1|	100	95	0	0	335	619	1	95	2e-46	193.7	WP_086393178.1	hypothetical protein [Chlamydia abortus]	95	live	83555	2017-05-24	2017-05-24		Chlamydia abortus	Bacteria	3	NZ_FPMM01000013.1:398-685,FPIG01000050.1:3010-3297,FPMM01000013.1:398-685	NZ_FPMM01000013.1	Chlamydia abortus strain 09_04, whole genome shotgun sequence	1330	L1P1_orf2	nr	bacteria	|-__root|-__cellular_organisms|k__Bacteria|-__PVC_group|p__Chlamydiae|c__Chlamydiia|o__Chlamydiales|f__Chlamydiaceae|-__Chlamydia/Chlamydophila_group|g__Chlamydia|s__Chlamydia_abortus
NZ_PYPV01000107.1:1455-1623	gi|912654315|ref|WP_050218443.1|	100	56	0	0	1	168	22	77	6e-25	120.9	WP_050218443.1	MULTISPECIES: hypothetical protein [Bacteria]	121	live	2	2015-08-05	2017-02-09		Bacteria	Bacteria	5	NZ_CKCF01000054.1:411-776,NZ_CKYY01000050.1:873-1238,NZ_CMHF01000073.1:511-876,NZ_FTZV01000318.1:2184-2549,FLRD01001310.1:976-1341	NZ_CKCF01000054.1	Streptococcus pneumoniae strain 35F, whole genome shotgun sequence	1317	ALR	nr	bacteria	|-__root|-__cellular_organisms|k__Bacteria
NZ_BFCK01000577.1:274-443	gi|657342185|ref|WP_029401717.1|	96.15	52	2	0	169	14	31	82	5e-20	104.8	WP_029401717.1	hypothetical protein [Mycobacterium tuberculosis]	82	live	1773	2014-06-18	2014-06-18		Mycobacterium tuberculosis	Bacteria	1	NZ_AUTF01000030.1:174-422	NZ_AUTF01000030.1	Mycobacterium tuberculosis Mtb526 contig_30, whole genome shotgun sequence	1313	HSATII	nr	bacteria	|-__root|-__cellular_organisms|k__Bacteria|-__Terrabacteria_group|p__Actinobacteria|c__Actinobacteria|o__Corynebacteriales|f__Mycobacteriaceae|g__Mycobacterium|-__Mycobacterium_tuberculosis_complex|s__Mycobacterium_tuberculosis
NZ_MTHW01000256.1:484-1176	gi|1187911793|gb|OSR98183.1|	100	224	0	0	1	672	126	349	5e-131	474.9	OSR98183.1	hypothetical protein BV333_05583 [Pseudomonas syringae pv. actinidiae]	349	live	103796	2017-04-28	2017-04-28		Pseudomonas syringae pv. actinidiae	Bacteria	1	MTHW01000256.1:109-1158	MTHW01000256.1	Pseudomonas syringae pv. actinidiae strain C29 BV333_256, whole genome shotgun sequence	1300	L1HS_3end	nr	bacteria	|-__root|-__cellular_organisms|k__Bacteria|p__Proteobacteria|c__Gammaproteobacteria|o__Pseudomonadales|f__Pseudomonadaceae|g__Pseudomonas|-__Pseudomonas_syringae_group|-__Pseudomonas_syringae_group_genomosp._1|s__Pseudomonas_syringae|-__Pseudomonas_syringae_group_pathovars_incertae_sedis|-__Pseudomonas_syringae_pv._actinidiae
NZ_MTHW01000256.1:484-1176	gi|1203204058|ref|WP_087674399.1|	100	169	0	0	166	672	1	169	1e-97	364	WP_087674399.1	DUF1725 domain-containing protein [Pseudomonas syringae]	169	live	317	2017-06-09	2017-07-08		Pseudomonas syringae	Bacteria	1	NZ_MTHW01000256.1:649-1158	NZ_MTHW01000256.1	Pseudomonas syringae pv. actinidiae strain C29 BV333_256, whole genome shotgun sequence	1300	L1HS_3end	nr	bacteria	|-__root|-__cellular_organisms|k__Bacteria|p__Proteobacteria|c__Gammaproteobacteria|o__Pseudomonadales|f__Pseudomonadaceae|g__Pseudomonas|-__Pseudomonas_syringae_group|-__Pseudomonas_syringae_group_genomosp._1|s__Pseudomonas_syringae
NZ_FTZV01000301.1:552-722	gi|1037157193|embl|SBT55551.1|	100	57	0	0	171	1	90	146	7e-24	117.5	SBT55551.1	hypothetical protein POVWA2_068460 [Plasmodium ovale wallikeri]	151	live	864142	2016-06-16	2016-06-16		Plasmodium ovale wallikeri	Eukaryota	1	FLRE01000943.1:50-608	FLRE01000943.1	Plasmodium ovale wallikeri genome assembly, contig: contig943, whole genome shotgun sequence	1298	ALR	nr	bacteria	|-__root|-__cellular_organisms|k__Eukaryota|-__Alveolata|p__Apicomplexa|c__Aconoidasida|o__Haemosporida|f__Plasmodiidae|g__Plasmodium|-__Plasmodium_(Plasmodium)|s__Plasmodium_ovale|-__Plasmodium_ovale_wallikeri
NZ_KE355805.1:164-335	gi|337292246|embl|CCB90290.1|	97.06	34	1	0	141	40	1	34	2e-10	72.8	CCB90290.1	unknown protein, partial [Waddlia chondrophila 2032/99]	34	live	765953	2011-06-22	2016-07-25		Waddlia chondrophila 2032/99	Bacteria	1	FR872590.1:1187-1293	FR872590.1	Waddlia chondrophila 2032/99 annotated genome fragment, clone 1103163150220	1293	ALR	nr	bacteria	|-__root|-__cellular_organisms|k__Bacteria|-__PVC_group|p__Chlamydiae|c__Chlamydiia|o__Parachlamydiales|f__Waddliaceae|g__Waddlia|s__Waddlia_chondrophila|-__Waddlia_chondrophila_2032/99
NZ_PYQD01000162.1:1-738	gi|657834538|ref|WP_029550593.1|	100	120	0	0	528	169	1	120	3e-70	273.1	WP_029550593.1	hypothetical protein, partial [Staphylococcus aureus]	120	live	1280	2014-06-19	2014-06-19		Staphylococcus aureus	Bacteria	1	NZ_JHDW01000025.1:918-1279	NZ_JHDW01000025.1	Staphylococcus aureus SA5-LAU contig_25, whole genome shotgun sequence	1279	L1HS_3end	nr	bacteria	|-__root|-__cellular_organisms|k__Bacteria|-__Terrabacteria_group|p__Firmicutes|c__Bacilli|o__Bacillales|f__Staphylococcaceae|g__Staphylococcus|s__Staphylococcus_aureus
NZ_PYPV01000107.1:1284-1454	gi|1327608500|ref|WP_102022348.1|	100	40	0	0	171	52	38	77	7e-16	90.9	WP_102022348.1	hypothetical protein [Klebsiella pneumoniae]	77	live	573	2018-01-11	2018-01-11		Klebsiella pneumoniae	Bacteria	1	NZ_NWDR01000110.1:55-288	NZ_NWDR01000110.1	Klebsiella pneumoniae subsp. pneumoniae strain WCHKP020127 NODE_117_length_1267_cov_12.3084, whole genome shotgun sequence	1267	ALR	nr	bacteria	|-__root|-__cellular_organisms|k__Bacteria|p__Proteobacteria|c__Gammaproteobacteria|o__Enterobacterales|f__Enterobacteriaceae|g__Klebsiella|s__Klebsiella_pneumoniae
NZ_FSLH01000036.1:790-958	gi|895651682|embl|CNX52117.1|	100	40	0	0	50	169	1	40	1e-14	86.7	CNX52117.1	Uncharacterised protein [Mycobacterium tuberculosis]	59	live	1773	2015-03-23	2015-06-14		Mycobacterium tuberculosis	Bacteria	1	CQSC01000259.1:252-431	CQSC01000259.1	Mycobacterium tuberculosis genome assembly 5227_6#11, scaffold ERS013440SCcontig000259, whole genome shotgun sequence	1266	ALR	nr	bacteria	|-__root|-__cellular_organisms|k__Bacteria|-__Terrabacteria_group|p__Actinobacteria|c__Actinobacteria|o__Corynebacteriales|f__Mycobacteriaceae|g__Mycobacterium|-__Mycobacterium_tuberculosis_complex|s__Mycobacterium_tuberculosis
NZ_CGZQ01000069.1:1-1661	gi|998523985|ref|XP_015464362.1|	97.58	165	4	0	962	1456	1	165	1e-83	320.1	XP_015464362.1	hypothetical protein AC631_05981, partial [Debaryomyces fabryi]	165	live	58627	2016-02-19	2017-08-28		Debaryomyces fabryi	Eukaryota	3	NW_015385825.1:606-1103,XM_015614810.1:1-498,LMYN01000399.1:606-1103	NW_015385825.1	Debaryomyces fabryi strain CBS 789 chromosome Unknown contig00401, whole genome shotgun sequence	1266	L1HS_5end	nr	bacteria	|-__root|-__cellular_organisms|k__Eukaryota|-__Opisthokonta|-__Fungi|-__Dikarya|p__Ascomycota|-__saccharomyceta|-__Saccharomycotina|c__Saccharomycetes|o__Saccharomycetales|f__Debaryomycetaceae|g__Debaryomyces|s__Debaryomyces_fabryi
NZ_JUHZ01000079.1:417-586	gi|733542400|gb|KHM23059.1|	100	56	0	0	169	2	1	80	3e-19	102.1	KHM23059.1	hypothetical protein KV34_21515 [[Enterobacter] aerogenes]	125	live	548	2014-12-16	2014-12-16		Klebsiella aerogenes	Bacteria	1	JUHZ01000079.1:280-657	JUHZ01000079.1	Klebsiella aerogenes strain ND17 contig86, whole genome shotgun sequence	1260	HSATII	nr	bacteria	|-__root|-__cellular_organisms|k__Bacteria|p__Proteobacteria|c__Gammaproteobacteria|o__Enterobacterales|f__Enterobacteriaceae|g__Klebsiella|s__Klebsiella_aerogenes
NZ_APIJ01000041.1:1-1248	gi|733134775|gb|KHK26790.1|	100	416	0	0	1248	1	1	416	2e-238	833.2	KHK26790.1	hypothetical protein I619_15649, partial [Listeria monocytogenes SHL010]	416	live	1302630	2014-12-15	2014-12-15		Listeria monocytogenes SHL010	Bacteria	1	APIJ01000041.1:1-1248	APIJ01000041.1	Listeria monocytogenes SHL010 contig42, whole genome shotgun sequence	1248	L1P1_orf2	nr	bacteria	|-__root|-__cellular_organisms|k__Bacteria|-__Terrabacteria_group|p__Firmicutes|c__Bacilli|o__Bacillales|f__Listeriaceae|g__Listeria|s__Listeria_monocytogenes|-__Listeria_monocytogenes_SHL010
NZ_FQSZ01000002.1:3949-6601	gi|1190689911|embl|SGW39268.1|	100	90	0	0	965	1234	1	90	7e-43	185.3	SGW39268.1	Retron-type reverse transcriptase [Chlamydia abortus]	90	live	83555	2017-05-10	2017-05-10		Chlamydia abortus	Bacteria	1	FQLK01000005.1:595-867	FQLK01000005.1	Chlamydia abortus strain 11_01 genome assembly, contig: ERS067066SCcontig000005, whole genome shotgun sequence	1244	L1P1_orf2	nr	bacteria	|-__root|-__cellular_organisms|k__Bacteria|-__PVC_group|p__Chlamydiae|c__Chlamydiia|o__Chlamydiales|f__Chlamydiaceae|-__Chlamydia/Chlamydophila_group|g__Chlamydia|s__Chlamydia_abortus
NZ_APME01000130.1:7-1182	gi|478440681|gb|ENN96850.1|	100	145	0	0	436	2	1	145	8e-78	299.7	ENN96850.1	hypothetical protein J139_20489, partial [Pseudoalteromonas agarivorans S816]	147	live	1307437	2013-04-11	2013-04-11		Pseudoalteromonas agarivorans S816	Bacteria	1	APME01000130.1:1-442	APME01000130.1	Pseudoalteromonas agarivorans S816 S816_contig_134, whole genome shotgun sequence	1241	L1P1_orf2	nr	bacteria	|-__root|-__cellular_organisms|k__Bacteria|p__Proteobacteria|c__Gammaproteobacteria|o__Alteromonadales|f__Pseudoalteromonadaceae|g__Pseudoalteromonas|s__Pseudoalteromonas_agarivorans|-__Pseudoalteromonas_agarivorans_S816
NZ_APME01000130.1:7-1182	gi|478440682|gb|ENN96851.1|	100	217	0	0	1086	436	1	217	7e-116	426	ENN96851.1	RNA-directed DNA polymerase [Pseudoalteromonas agarivorans S816]	217	live	1307437	2013-04-11	2013-04-11		Pseudoalteromonas agarivorans S816	Bacteria	1	APME01000130.1:439-1092	APME01000130.1	Pseudoalteromonas agarivorans S816 S816_contig_134, whole genome shotgun sequence	1241	L1P1_orf2	nr	bacteria	|-__root|-__cellular_organisms|k__Bacteria|p__Proteobacteria|c__Gammaproteobacteria|o__Alteromonadales|f__Pseudoalteromonadaceae|g__Pseudoalteromonas|s__Pseudoalteromonas_agarivorans|-__Pseudoalteromonas_agarivorans_S816
NZ_JHDW01000024.1:661-881	gi|657834535|ref|WP_029550591.1|	100	69	0	0	211	5	1	69	1e-32	146.7	WP_029550591.1	hypothetical protein [Staphylococcus aureus]	69	live	1280	2014-06-19	2014-06-19		Staphylococcus aureus	Bacteria	1	NZ_JHDW01000024.1:662-871	NZ_JHDW01000024.1	Staphylococcus aureus SA5-LAU contig_24, whole genome shotgun sequence	1238	HSATII	nr	bacteria	|-__root|-__cellular_organisms|k__Bacteria|-__Terrabacteria_group|p__Firmicutes|c__Bacilli|o__Bacillales|f__Staphylococcaceae|g__Staphylococcus|s__Staphylococcus_aureus
NZ_LMDS01000003.1:699-870	gi|879230178|embl|CIS73989.1|	100	53	0	0	172	14	74	126	4e-24	118.2	CIS73989.1	Uncharacterised protein [Streptococcus pneumoniae]	126	live	1313	2015-03-21	2015-06-13		Streptococcus pneumoniae	Bacteria	1	CKGI01000044.1:198-578	CKGI01000044.1	Streptococcus pneumoniae genome assembly 6631_1#23, scaffold ERS019493SCcontig000044, whole genome shotgun sequence	1235	HSATII	nr	bacteria	|-__root|-__cellular_organisms|k__Bacteria|-__Terrabacteria_group|p__Firmicutes|c__Bacilli|o__Lactobacillales|f__Streptococcaceae|g__Streptococcus|s__Streptococcus_pneumoniae
NZ_FUFS01000281.1:341-507	gi|1037144761|embl|SBT55688.1|	100	42	0	0	3	128	38	79	1e-14	86.7	SBT55688.1	hypothetical protein POVWA1_071590 [Plasmodium ovale wallikeri]	79	live	864142	2016-06-16	2016-06-16		Plasmodium ovale wallikeri	Eukaryota	1	FLRD01000816.1:293-532	FLRD01000816.1	Plasmodium ovale wallikeri genome assembly, contig: contig816, whole genome shotgun sequence	1228	ALR	nr	bacteria	|-__root|-__cellular_organisms|k__Eukaryota|-__Alveolata|p__Apicomplexa|c__Aconoidasida|o__Haemosporida|f__Plasmodiidae|g__Plasmodium|-__Plasmodium_(Plasmodium)|s__Plasmodium_ovale|-__Plasmodium_ovale_wallikeri
NZ_NARI01000200.1:37-203	gi|1037144762|embl|SBT55689.1|	100	41	0	0	165	43	38	78	8e-15	87.4	SBT55689.1	hypothetical protein POVWA1_071600 [Plasmodium ovale wallikeri]	137	live	864142	2016-06-16	2016-06-16		Plasmodium ovale wallikeri	Eukaryota	1	FLRD01000816.1:708-1207	FLRD01000816.1	Plasmodium ovale wallikeri genome assembly, contig: contig816, whole genome shotgun sequence	1228	ALR	nr	bacteria	|-__root|-__cellular_organisms|k__Eukaryota|-__Alveolata|p__Apicomplexa|c__Aconoidasida|o__Haemosporida|f__Plasmodiidae|g__Plasmodium|-__Plasmodium_(Plasmodium)|s__Plasmodium_ovale|-__Plasmodium_ovale_wallikeri
NZ_PVDJ01000040.1:1079-1249	gi|1037156259|embl|SBT56571.1|	97.73	44	1	0	1	132	127	170	5e-16	91.3	SBT56571.1	hypothetical protein POVWA2_074290 [Plasmodium ovale wallikeri]	170	live	864142	2016-06-16	2016-06-16		Plasmodium ovale wallikeri	Eukaryota	1	FLRE01001435.1:1-965	FLRE01001435.1	Plasmodium ovale wallikeri genome assembly, contig: contig1435, whole genome shotgun sequence	1227	ALR	nr	bacteria	|-__root|-__cellular_organisms|k__Eukaryota|-__Alveolata|p__Apicomplexa|c__Aconoidasida|o__Haemosporida|f__Plasmodiidae|g__Plasmodium|-__Plasmodium_(Plasmodium)|s__Plasmodium_ovale|-__Plasmodium_ovale_wallikeri
NZ_PYPZ01000306.1:282-511	gi|1178440364|ref|WP_082962740.1|	98.46	65	1	0	16	210	24	88	2e-28	132.5	WP_082962740.1	hypothetical protein, partial [Mycobacterium sp. 1100029.7]	88	live	1834067	2017-04-13	2017-04-13		Mycobacterium sp. 1100029.7	Bacteria	1	NZ_LZSC01000031.1:956-1222	NZ_LZSC01000031.1	Mycobacterium sp. 1100029.7 contig_39, whole genome shotgun sequence	1222	AluY	nr	bacteria	|-__root|-__cellular_organisms|k__Bacteria|-__Terrabacteria_group|p__Actinobacteria|c__Actinobacteria|o__Corynebacteriales|f__Mycobacteriaceae|g__Mycobacterium|s__Mycobacterium_sp._1100029.7
NZ_MOHL01000098.1:1490-1673	gi|897918711|embl|COW43180.1|	100	42	0	0	174	49	1	42	3e-19	102.1	COW43180.1	Uncharacterised protein [Mycobacterium tuberculosis]	42	live	1773	2015-03-23	2015-06-14		Mycobacterium tuberculosis	Bacteria	1	CRZK01000801.1:12-140	CRZK01000801.1	Mycobacterium tuberculosis genome assembly 6505_1#8, scaffold ERS007683SCcontig000801, whole genome shotgun sequence	1222	HSATII	nr	bacteria	|-__root|-__cellular_organisms|k__Bacteria|-__Terrabacteria_group|p__Actinobacteria|c__Actinobacteria|o__Corynebacteriales|f__Mycobacteriaceae|g__Mycobacterium|-__Mycobacterium_tuberculosis_complex|s__Mycobacterium_tuberculosis
NZ_NXKE01000226.1:113-284	gi|337292323|embl|CCB90358.1|	97.73	44	1	0	2	133	16	59	1e-16	93.6	CCB90358.1	hypothetical protein WCH_CW17610, partial [Waddlia chondrophila 2032/99]	59	live	765953	2011-06-22	2016-07-25		Waddlia chondrophila 2032/99	Bacteria	1	FR872600.1:1040-1221	FR872600.1	Waddlia chondrophila 2032/99 annotated genome fragment, clone 1103163150233	1221	ALR	nr	bacteria	|-__root|-__cellular_organisms|k__Bacteria|-__PVC_group|p__Chlamydiae|c__Chlamydiia|o__Parachlamydiales|f__Waddliaceae|g__Waddlia|s__Waddlia_chondrophila|-__Waddlia_chondrophila_2032/99
NZ_KE355833.1:1033-1204	gi|914297999|ref|WP_050567612.1|	100	51	0	0	3	155	16	66	2e-21	109.4	WP_050567612.1	hypothetical protein [Chlamydia psittaci]	66	live	83554	2015-08-10	2015-08-10		Chlamydia psittaci	Bacteria	1	NZ_KE355833.1:990-1190	NZ_KE355833.1	Chlamydia psittaci 03DC29 CP_03DC29.contig.187, whole genome shotgun sequence	1221	ALR	nr	bacteria	|-__root|-__cellular_organisms|k__Bacteria|-__PVC_group|p__Chlamydiae|c__Chlamydiia|o__Chlamydiales|f__Chlamydiaceae|-__Chlamydia/Chlamydophila_group|g__Chlamydia|s__Chlamydia_psittaci
NZ_PYQC01000120.1:1220-4510	gi|1355072943|gb|PQZ23283.1|	100	304	0	0	1	912	1	304	3e-174	622.1	PQZ23283.1	endonuclease, partial [Cronobacter sakazakii]	304	live	28141	2018-03-07	2018-03-07		Cronobacter sakazakii	Bacteria	1	PVDJ01000064.1:1-911	PVDJ01000064.1	Cronobacter sakazakii strain MOD1_LR646 LR646A_contig_67, whole genome shotgun sequence	1220	L1P1_orf2	nr	bacteria	|-__root|-__cellular_organisms|k__Bacteria|p__Proteobacteria|c__Gammaproteobacteria|o__Enterobacterales|f__Enterobacteriaceae|g__Cronobacter|s__Cronobacter_sakazakii
NZ_JPWZ01000251.1:1-551	gi|1358730710|ref|WP_105546409.1|	100	37	0	0	328	438	1	37	2e-11	77	WP_105546409.1	hypothetical protein [Cronobacter sakazakii]	37	live	28141	2018-03-13	2018-03-13		Cronobacter sakazakii	Bacteria	2	NZ_PVDJ01000064.1:975-1088,PVDJ01000064.1:975-1088	NZ_PVDJ01000064.1	Cronobacter sakazakii strain MOD1_LR646 LR646A_contig_67, whole genome shotgun sequence	1220	L1HS_5end	nr	bacteria	|-__root|-__cellular_organisms|k__Bacteria|p__Proteobacteria|c__Gammaproteobacteria|o__Enterobacterales|f__Enterobacteriaceae|g__Cronobacter|s__Cronobacter_sakazakii
NZ_FPIL01000020.1:250-1219	gi|1190714778|embl|SFW04328.1|	97.14	70	2	0	406	197	18	87	5e-31	143.7	SFW04328.1	Uncharacterised protein [Chlamydia abortus]	87	live	83555	2017-05-10	2017-05-10		Chlamydia abortus	Bacteria	1	FPIL01000020.1:38-301	FPIL01000020.1	Chlamydophila abortus strain POS genome assembly, contig: ERS003306SCcontig000020, whole genome shotgun sequence	1219	L1P1_orf2	nr	bacteria	|-__root|-__cellular_organisms|k__Bacteria|-__PVC_group|p__Chlamydiae|c__Chlamydiia|o__Chlamydiales|f__Chlamydiaceae|-__Chlamydia/Chlamydophila_group|g__Chlamydia|s__Chlamydia_abortus
NZ_FPIL01000020.1:250-1219	gi|1190714779|embl|SFW04332.1|	100	70	0	0	406	197	1	70	3e-32	147.9	SFW04332.1	Uncharacterised protein [Chlamydia abortus]	70	live	83555	2017-05-10	2017-05-10		Chlamydia abortus	Bacteria	3	FPIL01000020.1:443-655,FPIK01000024.1:403-615,FPIH01000031.1:165-377	FPIL01000020.1	Chlamydophila abortus strain POS genome assembly, contig: ERS003306SCcontig000020, whole genome shotgun sequence	1219	L1P1_orf2	nr	bacteria	|-__root|-__cellular_organisms|k__Bacteria|-__PVC_group|p__Chlamydiae|c__Chlamydiia|o__Chlamydiales|f__Chlamydiaceae|-__Chlamydia/Chlamydophila_group|g__Chlamydia|s__Chlamydia_abortus
NZ_NRUT01000108.1:556-723	gi|1037158073|embl|SBT53090.1|	97.56	41	1	0	46	168	7	47	5e-14	84.7	SBT53090.1	hypothetical protein POVWA2_063920 [Plasmodium ovale wallikeri]	221	live	864142	2016-06-16	2016-06-16		Plasmodium ovale wallikeri	Eukaryota	1	FLRE01000364.1:1-933	FLRE01000364.1	Plasmodium ovale wallikeri genome assembly, contig: contig364, whole genome shotgun sequence	1215	ALR	nr	bacteria	|-__root|-__cellular_organisms|k__Eukaryota|-__Alveolata|p__Apicomplexa|c__Aconoidasida|o__Haemosporida|f__Plasmodiidae|g__Plasmodium|-__Plasmodium_(Plasmodium)|s__Plasmodium_ovale|-__Plasmodium_ovale_wallikeri
NZ_FTZV01000200.1:6502-6669	gi|1407127400|ref|WP_111058745.1|	98.21	56	1	0	1	168	7	62	2e-25	122.9	WP_111058745.1	hypothetical protein [Staphylococcus aureus]	65	live	1280	2018-06-20	2018-06-20		Staphylococcus aureus	Bacteria	2	NZ_PZRW01000026.1:288-485,PZRW01000026.1:288-485	NZ_PZRW01000026.1	Staphylococcus aureus strain CM148 PROKKA_contig000034, whole genome shotgun sequence	1212	HSATII	nr	bacteria	|-__root|-__cellular_organisms|k__Bacteria|-__Terrabacteria_group|p__Firmicutes|c__Bacilli|o__Bacillales|f__Staphylococcaceae|g__Staphylococcus|s__Staphylococcus_aureus
NZ_CQTE01000215.1:1772-1937	gi|1392927456|gb|PWQ89370.1|	100	55	0	0	2	166	21	75	1e-24	119.8	PWQ89370.1	hypothetical protein DKX15_14355 [Enterococcus faecium]	93	live	1352	2018-05-26	2018-05-26		Enterococcus faecium	Bacteria	1	QGKP01000087.1:2-283	QGKP01000087.1	Enterococcus faecium strain HPCN13 Scaffold_88, whole genome shotgun sequence	1203	HSATII	nr	bacteria	|-__root|-__cellular_organisms|k__Bacteria|-__Terrabacteria_group|p__Firmicutes|c__Bacilli|o__Lactobacillales|f__Enterococcaceae|g__Enterococcus|s__Enterococcus_faecium
NZ_LMDS01000003.1:699-870	gi|1347316446|gb|PPQ21455.1|	98.11	53	1	0	172	14	11	63	1e-21	109.8	PPQ21455.1	hypothetical protein C4887_10680, partial [Streptococcus agalactiae]	63	live	1311	2018-02-21	2018-02-21		Streptococcus agalactiae	Bacteria	1	PTJJ01000027.1:1-194	PTJJ01000027.1	Streptococcus agalactiae strain PPM3 scaffold_27, whole genome shotgun sequence	1198	HSATII	nr	bacteria	|-__root|-__cellular_organisms|k__Bacteria|-__Terrabacteria_group|p__Firmicutes|c__Bacilli|o__Lactobacillales|f__Streptococcaceae|g__Streptococcus|s__Streptococcus_agalactiae
NZ_LZSF01000266.1:234-403	gi|1245908244|ref|WP_096151877.1|	98.21	56	1	0	1	168	40	95	7e-27	127.5	WP_096151877.1	hypothetical protein [Enterobacter hormaechei]	216	live	158836	2017-09-23	2018-01-12		Enterobacter hormaechei	Bacteria	1	NZ_BEFF01000058.1:362-1012	NZ_BEFF01000058.1	Enterobacter hormaechei strain TUM10692, whole genome shotgun sequence	1197	HSATII	nr	bacteria	|-__root|-__cellular_organisms|k__Bacteria|p__Proteobacteria|c__Gammaproteobacteria|o__Enterobacterales|f__Enterobacteriaceae|g__Enterobacter|-__Enterobacter_cloacae_complex|s__Enterobacter_hormaechei
NZ_FPIJ01000028.1:709-1403	gi|815097419|embl|CRH70616.1|	100	130	0	0	392	3	1	130	6e-68	265.4	CRH70616.1	Protein of uncharacterised function (DUF3704) [Chlamydia trachomatis]	137	live	813	2015-04-22	2015-06-14		Chlamydia trachomatis	Bacteria	1	CVOA01001239.1:13-426	CVOA01001239.1	Chlamydia trachomatis genome assembly 8036_1#15, scaffold ERS133246SCcontig001239, whole genome shotgun sequence	1190	L1HS_3end	nr	bacteria	|-__root|-__cellular_organisms|k__Bacteria|-__PVC_group|p__Chlamydiae|c__Chlamydiia|o__Chlamydiales|f__Chlamydiaceae|-__Chlamydia/Chlamydophila_group|g__Chlamydia|s__Chlamydia_trachomatis
NZ_MRBH01000275.1:301-467	gi|1125780038|embl|SIP66028.1|	100	52	0	0	10	165	1	52	4e-23	114.8	SIP66028.1	conserved hypothetical protein [Mycobacterium tuberculosis]	53	live	1773	2016-12-26	2016-12-26		Mycobacterium tuberculosis	Bacteria	1	FTKO01000196.1:310-471	FTKO01000196.1	Mycobacterium tuberculosis strain MTB13_M genome assembly, contig: BN9982_Contig_275, whole genome shotgun sequence	1189	HSATII	nr	bacteria	|-__root|-__cellular_organisms|k__Bacteria|-__Terrabacteria_group|p__Actinobacteria|c__Actinobacteria|o__Corynebacteriales|f__Mycobacteriaceae|g__Mycobacterium|-__Mycobacterium_tuberculosis_complex|s__Mycobacterium_tuberculosis
NZ_MRBH01000275.1:922-1124	gi|1125780040|embl|SIP66030.1|	100	32	0	0	20	115	1	32	3e-10	72.4	SIP66030.1	conserved hypothetical protein [Mycobacterium tuberculosis]	32	live	1773	2016-12-26	2016-12-26		Mycobacterium tuberculosis	Bacteria	1	FTKO01000196.1:941-1039	FTKO01000196.1	Mycobacterium tuberculosis strain MTB13_M genome assembly, contig: BN9982_Contig_275, whole genome shotgun sequence	1189	HSATII	nr	bacteria	|-__root|-__cellular_organisms|k__Bacteria|-__Terrabacteria_group|p__Actinobacteria|c__Actinobacteria|o__Corynebacteriales|f__Mycobacteriaceae|g__Mycobacterium|-__Mycobacterium_tuberculosis_complex|s__Mycobacterium_tuberculosis
NZ_PYPZ01000151.1:419-587	gi|1382142264|ref|WP_108011541.1|	97.22	36	1	0	109	2	1	36	6e-12	77.8	WP_108011541.1	hypothetical protein [Mycobacterium tuberculosis]	61	live	1773	2018-04-25	2018-04-25		Mycobacterium tuberculosis	Bacteria	1	NZ_PYPZ01000151.1:342-527	NZ_PYPZ01000151.1	Mycobacterium tuberculosis strain AUH13 NODE_164_length_1188_cov_0.640905, whole genome shotgun sequence	1188	ALR	nr	bacteria	|-__root|-__cellular_organisms|k__Bacteria|-__Terrabacteria_group|p__Actinobacteria|c__Actinobacteria|o__Corynebacteriales|f__Mycobacteriaceae|g__Mycobacterium|-__Mycobacterium_tuberculosis_complex|s__Mycobacterium_tuberculosis
NZ_AJRH01000151.1:1-529	gi|404456748|gb|EKA03382.1|	100	74	0	0	529	308	110	183	1e-34	154.1	EKA03382.1	hypothetical protein GMD6S_09383 [Streptococcus sp. GMD6S]	183	live	1169675	2012-09-14	2012-09-14		Streptococcus sp. GMD6S	Bacteria	1	AJRH01000151.1:305-856	AJRH01000151.1	Streptococcus sp. GMD6S Contig_151, whole genome shotgun sequence	1188	L1HS_5end	nr	bacteria	|-__root|-__cellular_organisms|k__Bacteria|-__Terrabacteria_group|p__Firmicutes|c__Bacilli|o__Lactobacillales|f__Streptococcaceae|g__Streptococcus|s__Streptococcus_sp._GMD6S
NZ_JPUG01000048.1:190-1832	gi|478440684|gb|ENN96852.1|	98.4	188	3	0	565	2	1	188	3e-105	391.7	ENN96852.1	hypothetical protein J139_20479, partial [Pseudoalteromonas agarivorans S816]	207	live	1307437	2013-04-11	2013-04-11		Pseudoalteromonas agarivorans S816	Bacteria	1	APME01000129.1:1-624	APME01000129.1	Pseudoalteromonas agarivorans S816 S816_contig_132, whole genome shotgun sequence	1186	L1P1_orf2	nr	bacteria	|-__root|-__cellular_organisms|k__Bacteria|p__Proteobacteria|c__Gammaproteobacteria|o__Alteromonadales|f__Pseudoalteromonadaceae|g__Pseudoalteromonas|s__Pseudoalteromonas_agarivorans|-__Pseudoalteromonas_agarivorans_S816
NZ_BFCK01000592.1:1-539	gi|478440685|gb|ENN96853.1|	100	157	0	0	514	44	1	157	5e-93	347.8	ENN96853.1	hypothetical protein J139_20484 [Pseudoalteromonas agarivorans S816]	157	live	1307437	2013-04-11	2013-04-11		Pseudoalteromonas agarivorans S816	Bacteria	1	APME01000129.1:626-1099	APME01000129.1	Pseudoalteromonas agarivorans S816 S816_contig_132, whole genome shotgun sequence	1186	L1HS_3end	nr	bacteria	|-__root|-__cellular_organisms|k__Bacteria|p__Proteobacteria|c__Gammaproteobacteria|o__Alteromonadales|f__Pseudoalteromonadaceae|g__Pseudoalteromonas|s__Pseudoalteromonas_agarivorans|-__Pseudoalteromonas_agarivorans_S816
NZ_APME01000129.1:415-1186	gi|748714477|ref|WP_039972597.1|	100	200	0	0	83	682	1	200	1e-118	434.1	WP_039972597.1	DUF1725 domain-containing protein [Pseudoalteromonas agarivorans]	200	live	176102	2015-01-17	2017-07-09		Pseudoalteromonas agarivorans	Bacteria	1	NZ_APME01000129.1:497-1099	NZ_APME01000129.1	Pseudoalteromonas agarivorans S816 S816_contig_132, whole genome shotgun sequence	1186	L1HS_3end	nr	bacteria	|-__root|-__cellular_organisms|k__Bacteria|p__Proteobacteria|c__Gammaproteobacteria|o__Alteromonadales|f__Pseudoalteromonadaceae|g__Pseudoalteromonas|s__Pseudoalteromonas_agarivorans
NZ_JWRS01000061.1:49-1184	gi|736253803|gb|KHQ14940.1|	99.71	341	1	0	112	1134	1	341	2e-194	687.2	KHQ14940.1	endonuclease, partial [Enterobacter hormaechei subsp. oharae]	341	live	301102	2014-12-23	2016-06-23		Enterobacter hormaechei subsp. oharae	Bacteria	1	JWRS01000061.1:160-1184	JWRS01000061.1	Enterobacter hormaechei subsp. oharae strain ND1 contig61, whole genome shotgun sequence	1184	L1P1_orf2	nr	bacteria	|-__root|-__cellular_organisms|k__Bacteria|p__Proteobacteria|c__Gammaproteobacteria|o__Enterobacterales|f__Enterobacteriaceae|g__Enterobacter|-__Enterobacter_cloacae_complex|s__Enterobacter_hormaechei|-__Enterobacter_hormaechei_subsp._oharae
NZ_JYDY01000065.1:124-1092	gi|764091434|gb|KJD20965.1|	100	83	0	0	250	2	1	83	8e-40	172.9	KJD20965.1	hypothetical protein TM41_09425, partial [Campylobacter jejuni subsp. jejuni]	124	live	32022	2015-03-04	2015-03-04		Campylobacter jejuni subsp. jejuni	Bacteria	1	JYDY01000065.1:1-373	JYDY01000065.1	Campylobacter jejuni subsp. jejuni strain C10-448 contig065, whole genome shotgun sequence	1184	L1P1_orf2	nr	bacteria	|-__root|-__cellular_organisms|k__Bacteria|p__Proteobacteria|-__delta/epsilon_subdivisions|c__Epsilonproteobacteria|o__Campylobacterales|f__Campylobacteraceae|g__Campylobacter|s__Campylobacter_jejuni|-__Campylobacter_jejuni_subsp._jejuni
NZ_KZ794899.1:444-612	gi|733532371|gb|KHM13321.1|	97.96	49	1	0	21	167	1	49	1e-20	106.7	KHM13321.1	hypothetical protein KV28_22970, partial [Enterobacter hormaechei subsp. oharae]	113	live	301102	2014-12-16	2016-06-15		Enterobacter hormaechei subsp. oharae	Bacteria	1	JUIA01000053.1:841-1180	JUIA01000053.1	Enterobacter hormaechei subsp. oharae strain ND19 contig56, whole genome shotgun sequence	1180	HSATII	nr	bacteria	|-__root|-__cellular_organisms|k__Bacteria|p__Proteobacteria|c__Gammaproteobacteria|o__Enterobacterales|f__Enterobacteriaceae|g__Enterobacter|-__Enterobacter_cloacae_complex|s__Enterobacter_hormaechei|-__Enterobacter_hormaechei_subsp._oharae
NZ_LYPH01000008.1:1269-1459	gi|746720421|ref|WP_039678122.1|	96.77	62	2	0	186	1	1	62	3e-32	145.2	WP_039678122.1	MULTISPECIES: hypothetical protein [Enterobacter cloacae complex]	62	live	354276	2015-01-12	2017-03-29		Enterobacter cloacae complex	Bacteria	3	NZ_JUIA01000053.1:256-444,NZ_MRAA01000053.1:1474-1662,JUIA01000053.1:256-444	NZ_JUIA01000053.1	Enterobacter hormaechei subsp. oharae strain ND19 contig56, whole genome shotgun sequence	1180	HSATII	nr	bacteria	|-__root|-__cellular_organisms|k__Bacteria|p__Proteobacteria|c__Gammaproteobacteria|o__Enterobacterales|f__Enterobacteriaceae|g__Enterobacter|-__Enterobacter_cloacae_complex
NZ_LAOQ01000029.1:837-1006	gi|1175526086|ref|WP_082068727.1|	100	39	0	0	2	118	23	61	2e-13	82.8	WP_082068727.1	hypothetical protein [Rickettsia argasii]	61	live	1441385	2017-04-10	2017-04-10		Rickettsia argasii	Bacteria	1	NZ_LAOQ01000029.1:772-957	NZ_LAOQ01000029.1	Rickettsia argasii T170-B grat170.contig.31_1, whole genome shotgun sequence	1178	ALR	nr	bacteria	|-__root|-__cellular_organisms|k__Bacteria|p__Proteobacteria|c__Alphaproteobacteria|o__Rickettsiales|f__Rickettsiaceae|-__Rickettsieae|g__Rickettsia|-__spotted_fever_group|s__Rickettsia_argasii
NZ_FPIL01000023.1:320-1177	gi|1197015214|ref|WP_086427309.1|	100	284	0	0	852	1	1	284	1e-168	600.5	WP_086427309.1	hypothetical protein [Chlamydia abortus]	321	live	83555	2017-05-24	2017-05-24		Chlamydia abortus	Bacteria	2	NZ_FPIL01000023.1:206-1171,FPIL01000023.1:206-1171	NZ_FPIL01000023.1	Chlamydia abortus strain POS, whole genome shotgun sequence	1177	L1P1_orf2	nr	bacteria	|-__root|-__cellular_organisms|k__Bacteria|-__PVC_group|p__Chlamydiae|c__Chlamydiia|o__Chlamydiales|f__Chlamydiaceae|-__Chlamydia/Chlamydophila_group|g__Chlamydia|s__Chlamydia_abortus
NZ_PGWY01000426.1:157-299	gi|337292243|embl|CCB90288.1|	100	35	0	0	20	124	1	35	3e-12	78.6	CCB90288.1	unknown protein, partial [Waddlia chondrophila 2032/99]	35	live	765953	2011-06-22	2016-07-25		Waddlia chondrophila 2032/99	Bacteria	1	FR872589.1:1067-1175	FR872589.1	Waddlia chondrophila 2032/99 annotated genome fragment, clone 1103163150219	1175	ALR	nr	bacteria	|-__root|-__cellular_organisms|k__Bacteria|-__PVC_group|p__Chlamydiae|c__Chlamydiia|o__Parachlamydiales|f__Waddliaceae|g__Waddlia|s__Waddlia_chondrophila|-__Waddlia_chondrophila_2032/99
NZ_FQLJ01000004.1:1-1509	gi|815045498|embl|CRH55810.1|	100	170	0	0	358	867	1	170	6e-91	344	CRH55810.1	Retron-type reverse transcriptase [Chlamydia trachomatis]	199	live	813	2015-04-22	2015-06-13		Chlamydia trachomatis	Bacteria	1	CVNU01000066.1:541-1140	CVNU01000066.1	Chlamydia trachomatis genome assembly 7501_6#59, scaffold ERS082928SCcontig000066, whole genome shotgun sequence	1170	L1P1_orf2	nr	bacteria	|-__root|-__cellular_organisms|k__Bacteria|-__PVC_group|p__Chlamydiae|c__Chlamydiia|o__Chlamydiales|f__Chlamydiaceae|-__Chlamydia/Chlamydophila_group|g__Chlamydia|s__Chlamydia_trachomatis
NZ_JTCH02000047.1:494-1168	gi|733503590|gb|KHL97741.1|	100	198	0	0	82	675	1	198	6e-117	427.9	KHL97741.1	endonuclease, partial [Enterobacter hormaechei subsp. oharae]	198	live	301102	2014-12-16	2016-06-15		Enterobacter hormaechei	Bacteria	2	JTCH02000047.1:575-1168,NZ_JTCH02000047.1:575-1168	JTCH02000047.1	Enterobacter hormaechei subsp. oharae strain NDC contig47, whole genome shotgun sequence	1168	L1HS_3end	nr	bacteria	|-__root|-__cellular_organisms|k__Bacteria|p__Proteobacteria|c__Gammaproteobacteria|o__Enterobacterales|f__Enterobacteriaceae|g__Enterobacter|-__Enterobacter_cloacae_complex|s__Enterobacter_hormaechei|-__Enterobacter_hormaechei_subsp._oharae
NZ_JHBZ01000007.1:202-689	gi|1164832166|ref|WP_079890219.1|	95.83	72	3	0	432	217	1	72	3e-31	142.5	WP_079890219.1	hypothetical protein [Pseudomonas aeruginosa]	72	live	287	2017-03-22	2017-03-22		Pseudomonas aeruginosa	Bacteria	1	NZ_LYTS01000132.1:43-261	NZ_LYTS01000132.1	Pseudomonas aeruginosa strain TRN6598 TRN6598_merged_contig_132_consensus, whole genome shotgun sequence	1165	L1HS_5end	nr	bacteria	|-__root|-__cellular_organisms|k__Bacteria|p__Proteobacteria|c__Gammaproteobacteria|o__Pseudomonadales|f__Pseudomonadaceae|g__Pseudomonas|-__Pseudomonas_aeruginosa_group|s__Pseudomonas_aeruginosa
NZ_FVQV01000023.1:1-169	gi|1245948129|ref|WP_096179768.1|	98.21	56	1	0	1	168	11	66	3e-24	118.6	WP_096179768.1	hypothetical protein, partial [Enterobacter hormaechei]	112	live	158836	2017-09-23	2017-09-23		Enterobacter hormaechei	Bacteria	1	NZ_BEFH01000087.1:1-338	NZ_BEFH01000087.1	Enterobacter hormaechei strain TUM10694, whole genome shotgun sequence	1164	HSATII	nr	bacteria	|-__root|-__cellular_organisms|k__Bacteria|p__Proteobacteria|c__Gammaproteobacteria|o__Enterobacterales|f__Enterobacteriaceae|g__Enterobacter|-__Enterobacter_cloacae_complex|s__Enterobacter_hormaechei
NZ_LZSF01000266.1:234-403	gi|515265476|ref|WP_016831114.1|	98.21	56	1	0	1	168	40	95	7e-27	127.5	WP_016831114.1	MULTISPECIES: hypothetical protein [Bacteria]	163	live	2	2013-06-27	2017-09-24		Bacteria	Bacteria	23	NZ_BEFH01000087.1:651-1142,NZ_BFCK01000542.1:683-1174,NZ_CFBR01000063.1:1033-1524,NZ_CMHF01000071.1:826-1317,NZ_CMIH01000036.1:1-493,NZ_FECI01000023.1:895-1386,NZ_MUNL01000072.1:302-793,NZ_NDFI01000038.1:192-683,NZ_QYJT01000045.1:497-988,CFBR01000063.1:1033-1524,CFSM01000122.1:235-726,CMHF01000071.1:826-1317,CMIH01000036.1:2-493,CQTE01000271.1:642-1133,CREL01000060.1:375-866,FECI01000023.1:895-13…	NZ_BEFH01000087.1	Enterobacter hormaechei strain TUM10694, whole genome shotgun sequence	1164	HSATII	nr	bacteria	|-__root|-__cellular_organisms|k__Bacteria
NZ_FQLL01000005.1:2080-3150	gi|1104567497|embl|SBW38116.1|	100	139	0	0	2	418	4	142	2e-73	285	SBW38116.1	hypothetical protein PBNK65E_000494100, partial [Plasmodium berghei]	291	live	5821	2016-09-10	2016-09-10		Plasmodium berghei	Eukaryota	1	FLVA01000049.1:1-1032	FLVA01000049.1	Plasmodium berghei strain NK65e genome assembly, contig: scaffold139_size1161_1_468, whole genome shotgun sequence	1161	L1P1_orf2	nr	bacteria	|-__root|-__cellular_organisms|k__Eukaryota|-__Alveolata|p__Apicomplexa|c__Aconoidasida|o__Haemosporida|f__Plasmodiidae|g__Plasmodium|-__Plasmodium_(Vinckeia)|s__Plasmodium_berghei
NZ_FRWH01000198.1:176-411	gi|1404485497|gb|PZL69521.1|	98.51	67	1	0	222	22	1	67	3e-21	108.6	PZL69521.1	hypothetical protein C0100_15850 [Staphylococcus aureus]	67	live	1280	2018-06-18	2018-06-18		Staphylococcus aureus	Bacteria	2	PKSS01000075.1:502-705,NZ_PKSS01000075.1:502-705	PKSS01000075.1	Staphylococcus aureus strain SAUR1404 SA1404_Contig75, whole genome shotgun sequence	1160	HSATII	nr	bacteria	|-__root|-__cellular_organisms|k__Bacteria|-__Terrabacteria_group|p__Firmicutes|c__Bacilli|o__Bacillales|f__Staphylococcaceae|g__Staphylococcus|s__Staphylococcus_aureus
NZ_PKSS01000075.1:867-1066	gi|1404485498|gb|PZL69522.1|	100	27	0	0	1	81	61	87	4e-08	65.1	PZL69522.1	hypothetical protein C0100_15855 [Staphylococcus aureus]	93	live	1280	2018-06-18	2018-06-18		Staphylococcus aureus	Bacteria	2	PKSS01000075.1:687-968,NZ_PKSS01000075.1:687-968	PKSS01000075.1	Staphylococcus aureus strain SAUR1404 SA1404_Contig75, whole genome shotgun sequence	1160	HSATII	nr	bacteria	|-__root|-__cellular_organisms|k__Bacteria|-__Terrabacteria_group|p__Firmicutes|c__Bacilli|o__Bacillales|f__Staphylococcaceae|g__Staphylococcus|s__Staphylococcus_aureus
NZ_JHDV01000049.1:117-285	gi|1391865141|ref|WP_109548630.1|	97.92	48	1	0	146	3	1	48	1e-18	99.8	WP_109548630.1	hypothetical protein [Mycobacteroides abscessus]	89	live	36809	2018-05-24	2018-05-24		Mycobacteroides abscessus	Bacteria	1	NZ_FSLH01000037.1:169-438	NZ_FSLH01000037.1	Mycobacteroides abscessus subsp. abscessus strain 1082, whole genome shotgun sequence	1156	ALR	nr	bacteria	|-__root|-__cellular_organisms|k__Bacteria|-__Terrabacteria_group|p__Actinobacteria|c__Actinobacteria|o__Corynebacteriales|f__Mycobacteriaceae|g__Mycobacteroides|s__Mycobacteroides_abscessus
NZ_FTZV01000366.1:773-942	gi|1391865142|ref|WP_109548631.1|	98.04	51	1	0	154	2	1	51	9e-21	107.1	WP_109548631.1	MULTISPECIES: hypothetical protein [Bacteria]	72	live	2	2018-05-24	2018-07-22		Bacteria	Bacteria	2	NZ_FSLH01000037.1:502-720,NZ_FTZV01000366.1:708-926	NZ_FSLH01000037.1	Mycobacteroides abscessus subsp. abscessus strain 1082, whole genome shotgun sequence	1156	ALR	nr	bacteria	|-__root|-__cellular_organisms|k__Bacteria
NZ_FRWP01000042.1:1-645	gi|380773974|gb|EIC07276.1|	99.5	200	1	0	7	606	1	200	3e-118	432.2	EIC07276.1	protein of unknown function DUF1725 [Microbacterium laevaniformans OR221]	200	live	1160710	2012-03-21	2012-03-21		Microbacterium laevaniformans OR221	Bacteria	1	AJGR01000126.1:51-653	AJGR01000126.1	Microbacterium laevaniformans OR221 ctg218, whole genome shotgun sequence	1156	L1HS_3end	nr	bacteria	|-__root|-__cellular_organisms|k__Bacteria|-__Terrabacteria_group|p__Actinobacteria|c__Actinobacteria|o__Micrococcales|f__Microbacteriaceae|g__Microbacterium|s__Microbacterium_laevaniformans|-__Microbacterium_laevaniformans_OR221
NZ_FVQV01000023.1:1-169	gi|1391910704|ref|WP_109558010.1|	100	56	0	0	1	168	1	56	6e-25	120.9	WP_109558010.1	hypothetical protein, partial [Mycobacteroides abscessus]	117	live	36809	2018-05-25	2018-05-25		Mycobacteroides abscessus	Bacteria	1	NZ_FVQV01000023.1:1-354	NZ_FVQV01000023.1	Mycobacteroides abscessus subsp. abscessus strain 1151, whole genome shotgun sequence	1148	HSATII	nr	bacteria	|-__root|-__cellular_organisms|k__Bacteria|-__Terrabacteria_group|p__Actinobacteria|c__Actinobacteria|o__Corynebacteriales|f__Mycobacteriaceae|g__Mycobacteroides|s__Mycobacteroides_abscessus
NZ_PWDA01000075.1:1509-1678	gi|1037157683|embl|SBT54668.1|	100	51	0	0	153	1	17	67	1e-19	103.6	SBT54668.1	hypothetical protein POVWA2_065910 [Plasmodium ovale wallikeri]	111	live	864142	2016-06-16	2016-06-16		Plasmodium ovale wallikeri	Eukaryota	1	FLRE01000631.1:1-1146	FLRE01000631.1	Plasmodium ovale wallikeri genome assembly, contig: contig631, whole genome shotgun sequence	1146	ALR	nr	bacteria	|-__root|-__cellular_organisms|k__Eukaryota|-__Alveolata|p__Apicomplexa|c__Aconoidasida|o__Haemosporida|f__Plasmodiidae|g__Plasmodium|-__Plasmodium_(Plasmodium)|s__Plasmodium_ovale|-__Plasmodium_ovale_wallikeri
NZ_ACEO02000031.1:5-1145	gi|284795568|gb|EFC50915.1|	98.84	86	1	0	345	88	1	86	3e-38	167.9	EFC50915.1	hypothetical protein NEISUBOT_05661 [Neisseria subflava NJ9703]	86	live	546268	2010-01-27	2013-06-04		Neisseria subflava NJ9703	Bacteria	1	ACEO02000031.1:89-349	ACEO02000031.1	Neisseria subflava NJ9703 N_subflava-1.0.1_Cont30.1, whole genome shotgun sequence	1145	L1P1_orf2	nr	bacteria	|-__root|-__cellular_organisms|k__Bacteria|p__Proteobacteria|c__Betaproteobacteria|o__Neisseriales|f__Neisseriaceae|g__Neisseria|s__Neisseria_subflava|-__Neisseria_subflava_NJ9703
NZ_ACEO02000031.1:5-1145	gi|284795569|gb|EFC50916.1|	100	193	0	0	1139	561	1	193	4e-96	360.5	EFC50916.1	hypothetical protein NEISUBOT_05662, partial [Neisseria subflava NJ9703]	193	live	546268	2010-01-27	2013-06-04		Neisseria subflava NJ9703	Bacteria	1	ACEO02000031.1:562-1145	ACEO02000031.1	Neisseria subflava NJ9703 N_subflava-1.0.1_Cont30.1, whole genome shotgun sequence	1145	L1P1_orf2	nr	bacteria	|-__root|-__cellular_organisms|k__Bacteria|p__Proteobacteria|c__Betaproteobacteria|o__Neisseriales|f__Neisseriaceae|g__Neisseria|s__Neisseria_subflava|-__Neisseria_subflava_NJ9703
NZ_MSRF01000134.1:7-303	gi|1141487060|gb|ONK23736.1|	98.65	74	1	0	223	2	1	74	2e-35	156	ONK23736.1	hypothetical protein BLX87_09050, partial [Bacillus sp. VT-16-64]	76	live	1917019	2017-02-04	2017-02-04		Bacillus sp. VT-16-64	Bacteria	1	MSRF01000134.1:1-229	MSRF01000134.1	Bacillus sp. VT-16-64 NODE_145, whole genome shotgun sequence	1139	MSTB	nr	bacteria	|-__root|-__cellular_organisms|k__Bacteria|-__Terrabacteria_group|p__Firmicutes|c__Bacilli|o__Bacillales|f__Bacillaceae|g__Bacillus|s__Bacillus_sp._VT-16-64
NZ_FPMP01000044.1:205-1063	gi|1196971183|ref|WP_086393368.1|	100	95	0	0	525	241	1	95	3e-46	194.1	WP_086393368.1	hypothetical protein [Chlamydia abortus]	95	live	83555	2017-05-24	2017-05-24		Chlamydia abortus	Bacteria	2	NZ_FPMP01000044.1:442-729,FPMP01000044.1:442-729	NZ_FPMP01000044.1	Chlamydia abortus strain S124_3A, whole genome shotgun sequence	1138	L1P1_orf2	nr	bacteria	|-__root|-__cellular_organisms|k__Bacteria|-__PVC_group|p__Chlamydiae|c__Chlamydiia|o__Chlamydiales|f__Chlamydiaceae|-__Chlamydia/Chlamydophila_group|g__Chlamydia|s__Chlamydia_abortus
NZ_PZSG01000127.1:1100-1267	gi|895651659|embl|CNX53097.1|	100	55	0	0	2	166	29	83	3e-23	115.2	CNX53097.1	Uncharacterised protein [Mycobacterium tuberculosis]	99	live	1773	2015-03-23	2015-06-14		Mycobacterium tuberculosis	Bacteria	1	CQSC01000269.2:759-1058	CQSC01000269.2	Mycobacterium tuberculosis genome assembly 5227_6#11, scaffold ERS013440SCcontig000269, whole genome shotgun sequence	1136	ALR	nr	bacteria	|-__root|-__cellular_organisms|k__Bacteria|-__Terrabacteria_group|p__Actinobacteria|c__Actinobacteria|o__Corynebacteriales|f__Mycobacteriaceae|g__Mycobacterium|-__Mycobacterium_tuberculosis_complex|s__Mycobacterium_tuberculosis
NZ_LPSC01000043.1:1-149	gi|895651673|embl|CNX52465.1|	100	45	0	0	9	143	1	50	9e-21	107.1	CNX52465.1	Uncharacterised protein [Mycobacterium tuberculosis]	135	live	1773	2015-03-23	2015-06-14		Mycobacterium tuberculosis	Bacteria	1	CQSC01000263.2:364-771	CQSC01000263.2	Mycobacterium tuberculosis genome assembly 5227_6#11, scaffold ERS013440SCcontig000263, whole genome shotgun sequence	1133	HSATII	nr	archaea	|-__root|-__cellular_organisms|k__Bacteria|-__Terrabacteria_group|p__Actinobacteria|c__Actinobacteria|o__Corynebacteriales|f__Mycobacteriaceae|g__Mycobacterium|-__Mycobacterium_tuberculosis_complex|s__Mycobacterium_tuberculosis
NZ_LZSF01000266.1:818-1029	gi|895651674|embl|CNX52482.1|	100	64	0	0	21	212	1	89	5e-30	137.9	CNX52482.1	Uncharacterised protein [Mycobacterium tuberculosis]	109	live	1773	2015-03-23	2015-06-14		Mycobacterium tuberculosis	Bacteria	1	CQSC01000263.2:796-1125	CQSC01000263.2	Mycobacterium tuberculosis genome assembly 5227_6#11, scaffold ERS013440SCcontig000263, whole genome shotgun sequence	1133	HSATII	nr	bacteria	|-__root|-__cellular_organisms|k__Bacteria|-__Terrabacteria_group|p__Actinobacteria|c__Actinobacteria|o__Corynebacteriales|f__Mycobacteriaceae|g__Mycobacterium|-__Mycobacterium_tuberculosis_complex|s__Mycobacterium_tuberculosis
NZ_QUZQ01000057.1:599-2658	gi|633375155|gb|KDB62257.1|	98.53	136	2	0	621	214	5	140	7e-75	291.2	KDB62257.1	hypothetical protein AZ16_5096 [Bordetella bronchiseptica B18-5 (C3)]	140	live	1458258	2014-05-12	2014-06-27		Bordetella bronchiseptica B18-5 (C3)	Bacteria	1	JGWP01000043.1:696-1118	JGWP01000043.1	Bordetella bronchiseptica B18-5 (C3) ctg7180000005556, whole genome shotgun sequence	1129	L1P1_orf2	nr	bacteria	|-__root|-__cellular_organisms|k__Bacteria|p__Proteobacteria|c__Betaproteobacteria|o__Burkholderiales|f__Alcaligenaceae|g__Bordetella|s__Bordetella_bronchiseptica|-__Bordetella_bronchiseptica_B18-5_(C3)
NZ_JUIE01000049.1:1-1125	gi|733555644|gb|KHM36058.1|	100	374	0	0	1123	2	2	375	6e-221	775	KHM36058.1	endonuclease, partial [Enterobacter hormaechei subsp. oharae]	375	live	301102	2014-12-16	2016-06-15		Enterobacter hormaechei subsp. oharae	Bacteria	1	JUIE01000049.1:1-1126	JUIE01000049.1	Enterobacter hormaechei subsp. oharae strain NDB contig49, whole genome shotgun sequence	1126	L1P1_orf2	nr	bacteria	|-__root|-__cellular_organisms|k__Bacteria|p__Proteobacteria|c__Gammaproteobacteria|o__Enterobacterales|f__Enterobacteriaceae|g__Enterobacter|-__Enterobacter_cloacae_complex|s__Enterobacter_hormaechei|-__Enterobacter_hormaechei_subsp._oharae
NZ_FPIH01000031.1:4-1125	gi|1190717754|embl|SFW06032.1|	100	146	0	0	1070	633	1	146	3e-72	281.2	SFW06032.1	Uncharacterised protein [Chlamydia abortus]	146	live	83555	2017-05-10	2017-05-10		Chlamydia abortus	Bacteria	1	FPIH01000031.1:633-1073	FPIH01000031.1	Chlamydophila abortus strain 86/30 genome assembly, contig: ERS008766SCcontig000031, whole genome shotgun sequence	1125	L1P1_orf2	nr	bacteria	|-__root|-__cellular_organisms|k__Bacteria|-__PVC_group|p__Chlamydiae|c__Chlamydiia|o__Chlamydiales|f__Chlamydiaceae|-__Chlamydia/Chlamydophila_group|g__Chlamydia|s__Chlamydia_abortus
NZ_FTZV01000317.1:1681-1844	gi|1037155351|embl|SBT57529.1|	100	43	0	0	1	129	76	118	6e-17	94.4	SBT57529.1	PIR Superfamily Protein [Plasmodium ovale wallikeri]	174	live	864142	2016-06-16	2016-06-16		Plasmodium ovale wallikeri	Eukaryota	1	FLRE01001880.1:1-978	FLRE01001880.1	Plasmodium ovale wallikeri genome assembly, contig: contig1880, whole genome shotgun sequence	1124	ALR	nr	bacteria	|-__root|-__cellular_organisms|k__Eukaryota|-__Alveolata|p__Apicomplexa|c__Aconoidasida|o__Haemosporida|f__Plasmodiidae|g__Plasmodium|-__Plasmodium_(Plasmodium)|s__Plasmodium_ovale|-__Plasmodium_ovale_wallikeri
NZ_FPIJ01000014.1:1-542	gi|1190713201|embl|SFW05855.1|	100	148	0	0	97	540	1	148	4e-79	301.6	SFW05855.1	Protein of uncharacterised function (DUF3704) [Chlamydia abortus]	155	live	83555	2017-05-10	2017-05-10		Chlamydia abortus	Bacteria	1	FPIJ01000014.1:97-564	FPIJ01000014.1	Chlamydophila abortus strain T20 genome assembly, contig: ERS003308SCcontig000014, whole genome shotgun sequence	1124	L1HS_3end	nr	bacteria	|-__root|-__cellular_organisms|k__Bacteria|-__PVC_group|p__Chlamydiae|c__Chlamydiia|o__Chlamydiales|f__Chlamydiaceae|-__Chlamydia/Chlamydophila_group|g__Chlamydia|s__Chlamydia_abortus
NZ_FPIJ01000014.1:1-542	gi|1196979759|ref|WP_086400417.1|	100	176	0	0	13	540	1	176	4e-96	357.8	WP_086400417.1	DUF3704 domain-containing protein [Chlamydia abortus]	183	live	83555	2017-05-24	2017-07-23		Chlamydia abortus	Bacteria	1	NZ_FPIJ01000014.1:13-564	NZ_FPIJ01000014.1	Chlamydia abortus strain T20, whole genome shotgun sequence	1124	L1HS_3end	nr	bacteria	|-__root|-__cellular_organisms|k__Bacteria|-__PVC_group|p__Chlamydiae|c__Chlamydiia|o__Chlamydiales|f__Chlamydiaceae|-__Chlamydia/Chlamydophila_group|g__Chlamydia|s__Chlamydia_abortus
NZ_FQLK01000011.1:1-437	gi|1196979760|ref|WP_086400418.1|	99.1	111	1	0	356	24	1	111	3e-55	222.2	WP_086400418.1	hypothetical protein [Chlamydia abortus]	111	live	83555	2017-05-24	2017-05-24		Chlamydia abortus	Bacteria	1	NZ_FPIJ01000014.1:613-948	NZ_FPIJ01000014.1	Chlamydia abortus strain T20, whole genome shotgun sequence	1124	L1P1_orf2	nr	bacteria	|-__root|-__cellular_organisms|k__Bacteria|-__PVC_group|p__Chlamydiae|c__Chlamydiia|o__Chlamydiales|f__Chlamydiaceae|-__Chlamydia/Chlamydophila_group|g__Chlamydia|s__Chlamydia_abortus
NZ_APIG01000023.1:1-1114	gi|733124171|gb|KHK16768.1|	98.73	79	1	0	355	591	1	79	2e-34	155.6	KHK16768.1	hypothetical protein I615_15006 [Listeria monocytogenes SHL007]	79	live	1302627	2014-12-15	2014-12-15		Listeria monocytogenes SHL007	Bacteria	1	APIG01000023.1:355-594	APIG01000023.1	Listeria monocytogenes SHL007 contig24, whole genome shotgun sequence	1114	L1P1_orf2	nr	bacteria	|-__root|-__cellular_organisms|k__Bacteria|-__Terrabacteria_group|p__Firmicutes|c__Bacilli|o__Bacillales|f__Listeriaceae|g__Listeria|s__Listeria_monocytogenes|-__Listeria_monocytogenes_SHL007
NZ_AMQR01000150.1:1-157	gi|897918638|embl|COW47457.1|	100	52	0	0	1	156	10	61	4e-24	118.2	COW47457.1	Uncharacterised protein [Mycobacterium tuberculosis]	72	live	1773	2015-03-23	2015-06-14		Mycobacterium tuberculosis	Bacteria	2	CRZK01000831.1:374-592,FSLH01000039.1:305-523	CRZK01000831.1	Mycobacterium tuberculosis genome assembly 6505_1#8, scaffold ERS007683SCcontig000831, whole genome shotgun sequence	1105	HSATII	nr	bacteria	|-__root|-__cellular_organisms|k__Bacteria|-__Terrabacteria_group|p__Actinobacteria|c__Actinobacteria|o__Corynebacteriales|f__Mycobacteriaceae|g__Mycobacterium|-__Mycobacterium_tuberculosis_complex|s__Mycobacterium_tuberculosis
NZ_MSZI01000075.1:128-784	gi|646640133|gb|KDQ71563.1|	100	166	0	0	128	625	1	166	6e-98	364.8	KDQ71563.1	hypothetical protein L798_09471 [Zootermopsis nevadensis]	166	live	136037	2014-06-05	2014-06-05		Zootermopsis nevadensis	Eukaryota	1	KK871452.1:598-1098	KK871452.1	Zootermopsis nevadensis unplaced genomic scaffold scaffold4445, whole genome shotgun sequence	1101	L1HS_3end	nr	bacteria	|-__root|-__cellular_organisms|k__Eukaryota|-__Opisthokonta|-__Metazoa|-__Eumetazoa|-__Bilateria|-__Protostomia|-__Ecdysozoa|-__Panarthropoda|p__Arthropoda|-__Mandibulata|-__Pancrustacea|-__Hexapoda|c__Insecta|-__Dicondylia|-__Pterygota|-__Neoptera|-__Polyneoptera|-__Dictyoptera|o__Blattodea|-__Blattoidea|-__Termitoidae|f__Termopsidae|-__Termopsinae|-__Termopsini|g__Zootermopsis|s__Zootermopsis_n…
[truncated: 1,358 more rows]

## Sheet: README
	Supplemental Table S5: Search results of identified contaminating sequences in bacterial and archaeal genomes against the BLAST nr database (excluding Chordates)
[truncated: 32 more rows]
