# Supplementary material for: Human contamination in bacterial genomes has created thousands of spurious proteins
Source: HighWire-hosted journal article supplement (doi:10.1101/gr.245373.118), 2019-05-07
Supplement: Supplemental_Table_S6.xlsx [file Supplemental_Table_S6.xlsx]

## Sheet: Sheet1
sseqid	qseqid	pident	length	mismatch	gapopen	qstart	qend	sstart	send	evalue	bitscore	AC	Entry name	Status	Protein names	Gene names	Organism	Length	Status	Organism ID	Taxonomic lineage (ALL)	Protein existence	Annotation	Caution	Features	Cross-reference (EMBL)	Cross-reference (RefSeq)	Gene encoded by	Ensembl transcript	Date of creation	Date of last modification
A0A044RWX4	NZ_PYPV01000348.1:1-148	95.92	49	2	0	147	1	91	139	5e-26	124	A0A044RWX4	A0A044RWX4_ONCVO	unreviewed	Uncharacterized protein		Onchocerca volvulus	291	unreviewed	6282	cellular organisms, Eukaryota, Opisthokonta, Metazoa, Eumetazoa, Bilateria, Protostomia, Ecdysozoa, Nematoda (roundworms), Chromadorea, Spirurida, Spiruromorpha, Filarioidea, Onchocercidae, Onchocerca, Onchocerca volvulus	Predicted	1 out of 5							2014-07-09	2018-03-28
A0A044RWX9	NZ_LPSC01000025.1:1-158	100	27	0	0	1	81	88	114	5e-09	67.4	A0A044RWX9	A0A044RWX9_ONCVO	unreviewed	Uncharacterized protein		Onchocerca volvulus	114	unreviewed	6282	cellular organisms, Eukaryota, Opisthokonta, Metazoa, Eumetazoa, Bilateria, Protostomia, Ecdysozoa, Nematoda (roundworms), Chromadorea, Spirurida, Spiruromorpha, Filarioidea, Onchocercidae, Onchocerca, Onchocerca volvulus	Predicted	1 out of 5							2014-07-09	2018-03-28
A0A044RXA6	NZ_QLAN01000094.1:372-506	97.78	45	1	0	1	135	19	63	1e-18	99.4	A0A044RXA6	A0A044RXA6_ONCVO	unreviewed	Uncharacterized protein		Onchocerca volvulus	74	unreviewed	6282	cellular organisms, Eukaryota, Opisthokonta, Metazoa, Eumetazoa, Bilateria, Protostomia, Ecdysozoa, Nematoda (roundworms), Chromadorea, Spirurida, Spiruromorpha, Filarioidea, Onchocercidae, Onchocerca, Onchocerca volvulus	Predicted	1 out of 5							2014-07-09	2018-03-28
A0A044RXU1	NZ_CMHG01000050.1:5-174	98.21	56	1	0	2	169	6	61	2e-23	115.5	A0A044RXU1	A0A044RXU1_ONCVO	unreviewed	Uncharacterized protein		Onchocerca volvulus	178	unreviewed	6282	cellular organisms, Eukaryota, Opisthokonta, Metazoa, Eumetazoa, Bilateria, Protostomia, Ecdysozoa, Nematoda (roundworms), Chromadorea, Spirurida, Spiruromorpha, Filarioidea, Onchocercidae, Onchocerca, Onchocerca volvulus	Predicted	1 out of 5							2014-07-09	2018-03-28
A0A044RXU5	NZ_AMQR01000149.1:104-227	96.97	33	1	0	101	3	1	33	8e-10	70.1	A0A044RXU5	A0A044RXU5_ONCVO	unreviewed	Uncharacterized protein		Onchocerca volvulus	87	unreviewed	6282	cellular organisms, Eukaryota, Opisthokonta, Metazoa, Eumetazoa, Bilateria, Protostomia, Ecdysozoa, Nematoda (roundworms), Chromadorea, Spirurida, Spiruromorpha, Filarioidea, Onchocercidae, Onchocerca, Onchocerca volvulus	Predicted	1 out of 5							2014-07-09	2018-03-28
A0A060BQU5	NZ_FPMS01000006.1:1-2235	97.41	116	3	0	360	13	2	117	3e-53	218.8	A0A060BQU5	A0A060BQU5_9BACT	unreviewed	RVT_1 (Fragment)		uncultured bacterium	126	unreviewed	77133	cellular organisms, Bacteria, environmental samples, uncultured bacterium	Predicted	1 out of 5		Domain (1); Non-terminal residue (1)	KF117809;				2014-09-03	2017-11-22
A0A061BSP5	NZ_BECC01000060.1:359-1164	99.55	221	1	0	1	663	104	324	5e-121	441.8	A0A061BSP5	A0A061BSP5_BABBI	unreviewed	Uncharacterized protein	BBBOND_0001950	Babesia bigemina	331	unreviewed	5866	cellular organisms, Eukaryota, Alveolata, Apicomplexa, Aconoidasida, Piroplasmida (Piroplasmids), Babesiidae, Babesia, Babesia bigemina	Predicted	1 out of 5			LK054995;	XP_012770489.1;			2014-09-03	2017-06-07
A0A067QEU6	NZ_CFBR01000078.1:1-635	100	166	0	0	59	556	1	166	4e-98	364.8	A0A067QEU6	A0A067QEU6_ZOONE	unreviewed	Uncharacterized protein	L798_09471	Zootermopsis nevadensis (Dampwood termite)	166	unreviewed	136037	cellular organisms, Eukaryota, Opisthokonta, Metazoa, Eumetazoa, Bilateria, Protostomia, Ecdysozoa, Panarthropoda, Arthropoda, Mandibulata, Pancrustacea, Hexapoda, Insecta, Dicondylia, Pterygota (winged insects), Neoptera, Polyneoptera, Dictyoptera, Blattodea (cockroaches), Blattoidea, Termitoidae (termites), Termopsidae (damp wood termites), Termopsinae, Termopsini, Zootermopsis, Zootermopsis ne…	Predicted	1 out of 5		Domain (1)	KK871452;				2014-09-03	2017-06-07
A0A075H748	NZ_BCMN01000080.1:622-790	100	36	0	0	3	110	58	93	2e-11	75.9	A0A075H748	A0A075H748_9ARCH	unreviewed	Uncharacterized protein		uncultured marine thaumarchaeote KM3_53_F08	93	unreviewed	1456186	cellular organisms, Archaea, TACK group, Thaumarchaeota, environmental samples, uncultured marine thaumarchaeote KM3_53_F08	Predicted	1 out of 5			KF900928;				2014-10-29	2014-10-29
A0A078AFQ0	NZ_APME01000129.1:415-1186	100	134	0	0	185	586	1	134	3e-79	302.8	A0A078AFQ0	A0A078AFQ0_STYLE	unreviewed	Rna-directed dna partial	Contig12815.g13677 STYLEM_10073	Stylonychia lemnae (Ciliate)	190	unreviewed	5949	cellular organisms, Eukaryota, Alveolata, Ciliophora, Intramacronucleata, Spirotrichea, Stichotrichia, Sporadotrichida, Oxytrichidae, Stylonychinae, Stylonychia, Stylonychia lemnae (Ciliate)	Predicted	1 out of 5			CCKQ01009572;				2014-10-29	2016-05-11
A0A081NSY2	NZ_JNVM01000096.1:84-272	100	62	0	0	188	3	1	97	1e-29	136	A0A081NSY2	A0A081NSY2_9BACL	unreviewed	Uncharacterized protein	ET33_03555	Paenibacillus tyrfis	106	unreviewed	1501230	cellular organisms, Bacteria, Terrabacteria group, Firmicutes, Bacilli, Bacillales, Paenibacillaceae, Paenibacillus, Paenibacillus tyrfis	Predicted	1 out of 5	CAUTION: The sequence shown here is derived from an EMBL/GenBank/DDBJ whole genome shotgun (WGS) entry which is preliminary data. {ECO:0000313|EMBL:KEQ21555.1}.		JNVM01000096;				2014-10-29	2016-10-05
A0A081NSY3	NZ_AAXW01000147.1:256-1175	100	92	0	0	839	564	1	92	6e-49	202.6	A0A081NSY3	A0A081NSY3_9BACL	unreviewed	Uncharacterized protein (Fragment)	ET33_37740	Paenibacillus tyrfis	92	unreviewed	1501230	cellular organisms, Bacteria, Terrabacteria group, Firmicutes, Bacilli, Bacillales, Paenibacillaceae, Paenibacillus, Paenibacillus tyrfis	Predicted	1 out of 5	CAUTION: The sequence shown here is derived from an EMBL/GenBank/DDBJ whole genome shotgun (WGS) entry which is preliminary data. {ECO:0000313|EMBL:KEQ21556.1}.	Non-terminal residue (1)	JNVM01000094;				2014-10-29	2016-07-06
A0A094KBP3	NZ_FVQV01000030.1:335-527	100	64	0	0	193	2	16	134	9e-26	123.2	A0A094KBP3	A0A094KBP3_9PEZI	unreviewed	Uncharacterized protein	V502_03873	Pseudogymnoascus sp. VKM F-4520 (FW-2644)	270	unreviewed	1420915	cellular organisms, Eukaryota, Opisthokonta, Fungi, Dikarya, Ascomycota, saccharomyceta, Pezizomycotina, leotiomyceta, sordariomyceta, Leotiomycetes, Leotiomycetes incertae sedis, Pseudeurotiaceae, Pseudogymnoascus, Pseudogymnoascus sp. VKM F-4520 (FW-2644)	Predicted	1 out of 5	CAUTION: The sequence shown here is derived from an EMBL/GenBank/DDBJ whole genome shotgun (WGS) entry which is preliminary data. {ECO:0000313|EMBL:KFZ19028.1}.		JPKE01001487;				2014-11-26	2016-11-02
A0A095S8U5	NZ_AVEA02000451.1:1-499	100	66	0	0	40	237	1	66	1e-31	143.3	A0A095S8U5	A0A095S8U5_9GAMM	unreviewed	Uncharacterized protein (Fragment)	Y5S_03778	Alcanivorax nanhaiticus	66	unreviewed	1177154	cellular organisms, Bacteria, Proteobacteria, Gammaproteobacteria, Oceanospirillales, Alcanivoracaceae, Alcanivorax, Alcanivorax nanhaiticus	Predicted	1 out of 5	CAUTION: The sequence shown here is derived from an EMBL/GenBank/DDBJ whole genome shotgun (WGS) entry which is preliminary data. {ECO:0000313|EMBL:KGD60679.1}.	Domain (1); Non-terminal residue (1)	ARXV01000034;				2014-11-26	2018-06-20
A0A095TE21	NZ_NRGE01000067.1:1-2281	98.9	181	2	0	1739	2281	1	181	5e-102	380.9	A0A095TE21	A0A095TE21_9GAMM	unreviewed	Uncharacterized protein (Fragment)	Y5S_03777	Alcanivorax nanhaiticus	258	unreviewed	1177154	cellular organisms, Bacteria, Proteobacteria, Gammaproteobacteria, Oceanospirillales, Alcanivoracaceae, Alcanivorax, Alcanivorax nanhaiticus	Predicted	1 out of 5	CAUTION: The sequence shown here is derived from an EMBL/GenBank/DDBJ whole genome shotgun (WGS) entry which is preliminary data. {ECO:0000313|EMBL:KGD60678.1}.	Non-terminal residue (1)	ARXV01000034;				2014-11-26	2018-06-20
A0A096XIB8	NZ_CKCF01000051.1:903-1626	98.4	188	3	0	1	564	124	311	1e-110	406.8	A0A096XIB8	A0A096XIB8_9ACAR	unreviewed	Endonuclease (Fragment)		Nuttalliella namaqua	311	unreviewed	1029659	cellular organisms, Eukaryota, Opisthokonta, Metazoa, Eumetazoa, Bilateria, Protostomia, Ecdysozoa, Panarthropoda, Arthropoda, Chelicerata, Arachnida, Acari, Parasitiformes, Ixodida (ticks), Ixodoidea, Nuttalliellidae, Nuttalliella, Nuttalliella namaqua	Predicted	1 out of 5		Non-terminal residue (2)	KF925845;				2015-01-07	2015-03-04
A0A0B6XU34	NZ_CMKS01000057.1:2442-2612	100	39	0	0	117	1	1	39	9e-14	83.2	A0A0B6XU34	A0A0B6XU34_9EUPU	unreviewed	Uncharacterized protein (Fragment)	ORF1295	Arion vulgaris	72	unreviewed	1028688	cellular organisms, Eukaryota, Opisthokonta, Metazoa, Eumetazoa, Bilateria, Protostomia, Lophotrochozoa, Mollusca, Gastropoda, Heterobranchia, Euthyneura, Panpulmonata, Eupulmonata, Stylommatophora (land snails), Sigmurethra, Arionoidea, Arionidae, Arion, Arion vulgaris	Predicted	1 out of 5		Non-terminal residue (2)	HACG01000539;				2015-04-01	2015-04-01
A0A0B6YZA6	NZ_AUWS01000130.1:1-1132	97.3	74	2	0	1076	855	1	74	1e-31	146	A0A0B6YZA6	A0A0B6YZA6_9EUPU	unreviewed	Uncharacterized protein (Fragment)	ORF41085	Arion vulgaris	74	unreviewed	1028688	cellular organisms, Eukaryota, Opisthokonta, Metazoa, Eumetazoa, Bilateria, Protostomia, Lophotrochozoa, Mollusca, Gastropoda, Heterobranchia, Euthyneura, Panpulmonata, Eupulmonata, Stylommatophora (land snails), Sigmurethra, Arionoidea, Arionidae, Arion, Arion vulgaris	Predicted	1 out of 5		Non-terminal residue (2)	HACG01014161;				2015-04-01	2017-10-25
A0A0B6ZX07	NZ_QDDX01000074.1:1376-3906	96.58	117	4	0	1087	1437	1	117	8e-56	227.6	A0A0B6ZX07	A0A0B6ZX07_9EUPU	unreviewed	Uncharacterized protein (Fragment)	ORF82132	Arion vulgaris	117	unreviewed	1028688	cellular organisms, Eukaryota, Opisthokonta, Metazoa, Eumetazoa, Bilateria, Protostomia, Lophotrochozoa, Mollusca, Gastropoda, Heterobranchia, Euthyneura, Panpulmonata, Eupulmonata, Stylommatophora (land snails), Sigmurethra, Arionoidea, Arionidae, Arion, Arion vulgaris	Predicted	1 out of 5		Non-terminal residue (2)	HACG01025511;				2015-04-01	2015-04-01
A0A0B7AB42	NZ_FSLH01000021.1:2002-2172	100	32	0	0	171	76	56	87	2e-08	65.5	A0A0B7AB42	A0A0B7AB42_9EUPU	unreviewed	Uncharacterized protein (Fragment)	ORF103379	Arion vulgaris	87	unreviewed	1028688	cellular organisms, Eukaryota, Opisthokonta, Metazoa, Eumetazoa, Bilateria, Protostomia, Lophotrochozoa, Mollusca, Gastropoda, Heterobranchia, Euthyneura, Panpulmonata, Eupulmonata, Stylommatophora (land snails), Sigmurethra, Arionoidea, Arionidae, Arion, Arion vulgaris	Predicted	1 out of 5		Non-terminal residue (2)	HACG01030325;				2015-04-01	2015-04-01
A0A0B7AC30	NZ_AKPL01000008.1:1-2797	97.92	144	3	0	1382	1813	1	144	1e-69	273.9	A0A0B7AC30	A0A0B7AC30_9EUPU	unreviewed	Uncharacterized protein (Fragment)	ORF110846	Arion vulgaris	144	unreviewed	1028688	cellular organisms, Eukaryota, Opisthokonta, Metazoa, Eumetazoa, Bilateria, Protostomia, Lophotrochozoa, Mollusca, Gastropoda, Heterobranchia, Euthyneura, Panpulmonata, Eupulmonata, Stylommatophora (land snails), Sigmurethra, Arionoidea, Arionidae, Arion, Arion vulgaris	Predicted	1 out of 5		Domain (1); Non-terminal residue (2)	HACG01031704;				2015-04-01	2017-11-22
A0A0B7AFZ8	NZ_AIOD01000141.1:1-543	98.61	72	1	0	269	54	1	72	5e-33	147.9	A0A0B7AFZ8	A0A0B7AFZ8_9EUPU	unreviewed	Uncharacterized protein (Fragment)	ORF112274	Arion vulgaris	72	unreviewed	1028688	cellular organisms, Eukaryota, Opisthokonta, Metazoa, Eumetazoa, Bilateria, Protostomia, Lophotrochozoa, Mollusca, Gastropoda, Heterobranchia, Euthyneura, Panpulmonata, Eupulmonata, Stylommatophora (land snails), Sigmurethra, Arionoidea, Arionidae, Arion, Arion vulgaris	Predicted	1 out of 5		Non-terminal residue (2)	HACG01031990;				2015-04-01	2015-04-01
A0A0B7AG49	NZ_AAXW01000147.1:256-1175	98.63	73	1	0	740	522	1	73	1e-37	164.9	A0A0B7AG49	A0A0B7AG49_9EUPU	unreviewed	Uncharacterized protein (Fragment)	ORF112494	Arion vulgaris	73	unreviewed	1028688	cellular organisms, Eukaryota, Opisthokonta, Metazoa, Eumetazoa, Bilateria, Protostomia, Lophotrochozoa, Mollusca, Gastropoda, Heterobranchia, Euthyneura, Panpulmonata, Eupulmonata, Stylommatophora (land snails), Sigmurethra, Arionoidea, Arionidae, Arion, Arion vulgaris	Predicted	1 out of 5		Non-terminal residue (2)	HACG01032040;				2015-04-01	2015-04-01
A0A0B7B3K8	NZ_MWPX01000113.1:630-2078	95.73	117	5	0	651	301	1	117	4e-63	250.8	A0A0B7B3K8	A0A0B7B3K8_9EUPU	unreviewed	Uncharacterized protein (Fragment)	ORF162137	Arion vulgaris	119	unreviewed	1028688	cellular organisms, Eukaryota, Opisthokonta, Metazoa, Eumetazoa, Bilateria, Protostomia, Lophotrochozoa, Mollusca, Gastropoda, Heterobranchia, Euthyneura, Panpulmonata, Eupulmonata, Stylommatophora (land snails), Sigmurethra, Arionoidea, Arionidae, Arion, Arion vulgaris	Predicted	1 out of 5		Non-terminal residue (2)	HACG01041054;				2015-04-01	2015-04-01
A0A0B7B753	NZ_CBLY010000001.1:255-1006	98.59	71	1	0	405	193	7	77	4e-31	142.9	A0A0B7B753	A0A0B7B753_9EUPU	unreviewed	Uncharacterized protein (Fragment)	ORF162138	Arion vulgaris	77	unreviewed	1028688	cellular organisms, Eukaryota, Opisthokonta, Metazoa, Eumetazoa, Bilateria, Protostomia, Lophotrochozoa, Mollusca, Gastropoda, Heterobranchia, Euthyneura, Panpulmonata, Eupulmonata, Stylommatophora (land snails), Sigmurethra, Arionoidea, Arionidae, Arion, Arion vulgaris	Predicted	1 out of 5		Non-terminal residue (2)	HACG01041055;				2015-04-01	2015-04-01
A0A0B7C1A4	NZ_FSLH01000020.1:573-739	100	31	0	0	1	93	35	65	5e-09	67.4	A0A0B7C1A4	A0A0B7C1A4_9EUPU	unreviewed	Uncharacterized protein (Fragment)	ORF220841	Arion vulgaris	65	unreviewed	1028688	cellular organisms, Eukaryota, Opisthokonta, Metazoa, Eumetazoa, Bilateria, Protostomia, Lophotrochozoa, Mollusca, Gastropoda, Heterobranchia, Euthyneura, Panpulmonata, Eupulmonata, Stylommatophora (land snails), Sigmurethra, Arionoidea, Arionidae, Arion, Arion vulgaris	Predicted	1 out of 5		Non-terminal residue (1)	HACG01052388;				2015-04-01	2015-04-01
A0A0C3RJK7	NZ_JPIU01000032.1:2-736	100	69	0	0	509	303	1	69	3e-32	146.4	A0A0C3RJK7	A0A0C3RJK7_9PORP	unreviewed	Uncharacterized protein	BA92_02890	Sanguibacteroides justesenii	69	unreviewed	1547597	cellular organisms, Bacteria, FCB group, Bacteroidetes/Chlorobi group, Bacteroidetes, Bacteroidia, Bacteroidales, Porphyromonadaceae, Sanguibacteroides, Sanguibacteroides justesenii	Predicted	1 out of 5	CAUTION: The sequence shown here is derived from an EMBL/GenBank/DDBJ whole genome shotgun (WGS) entry which is preliminary data. {ECO:0000313|EMBL:KIO46424.1}.	Domain (1)	JPIU01000032;				2015-04-01	2017-11-22
A0A0C3RLL0	NZ_JPIU01000011.1:271-580	100	38	0	0	310	197	23	60	2e-13	82.8	A0A0C3RLL0	A0A0C3RLL0_9PORP	unreviewed	Uncharacterized protein	BA92_00060	Sanguibacteroides justesenii	61	unreviewed	1547597	cellular organisms, Bacteria, FCB group, Bacteroidetes/Chlorobi group, Bacteroidetes, Bacteroidia, Bacteroidales, Porphyromonadaceae, Sanguibacteroides, Sanguibacteroides justesenii	Predicted	1 out of 5	CAUTION: The sequence shown here is derived from an EMBL/GenBank/DDBJ whole genome shotgun (WGS) entry which is preliminary data. {ECO:0000313|EMBL:KIO47619.1}.		JPIU01000011;	WP_041504628.1;			2015-04-01	2017-06-07
A0A0C9R7A3	NZ_LZSF01000266.1:234-403	98.21	56	1	0	1	168	5	60	4e-27	127.5	A0A0C9R7A3	A0A0C9R7A3_9HYME	unreviewed	OAF3 protein (Fragment)	OAF3 g.42202	Fopius arisanus	115	unreviewed	64838	cellular organisms, Eukaryota, Opisthokonta, Metazoa, Eumetazoa, Bilateria, Protostomia, Ecdysozoa, Panarthropoda, Arthropoda, Mandibulata, Pancrustacea, Hexapoda, Insecta, Dicondylia, Pterygota (winged insects), Neoptera, Holometabola, Hymenoptera, Apocrita (wasps, ants and bees), Parasitoida, Ichneumonoidea, Braconidae, Opiinae, Fopius, Fopius arisanus	Predicted	1 out of 5		Non-terminal residue (2)	GBYB01003830;				2015-04-29	2018-10-10
A0A0C9RZ77	NZ_LXQV01000030.1:4-154	100	48	0	0	151	8	59	106	2e-21	109	A0A0C9RZ77	A0A0C9RZ77_9HYME	unreviewed	SseI protein	sseI g.42203	Fopius arisanus	106	unreviewed	64838	cellular organisms, Eukaryota, Opisthokonta, Metazoa, Eumetazoa, Bilateria, Protostomia, Ecdysozoa, Panarthropoda, Arthropoda, Mandibulata, Pancrustacea, Hexapoda, Insecta, Dicondylia, Pterygota (winged insects), Neoptera, Holometabola, Hymenoptera, Apocrita (wasps, ants and bees), Parasitoida, Ichneumonoidea, Braconidae, Opiinae, Fopius, Fopius arisanus	Predicted	1 out of 5			GBYB01014720;				2015-04-29	2018-10-10
A0A0D3AH13	NZ_PYQD01000170.1:173-335	98.15	54	1	0	163	2	12	65	5e-26	124	A0A0D3AH13	A0A0D3AH13_BRAOL	unreviewed	Uncharacterized protein		Brassica oleracea var. oleracea	66	unreviewed	109376	cellular organisms, Eukaryota, Viridiplantae, Streptophyta, Streptophytina, Embryophyta, Tracheophyta, Euphyllophyta, Spermatophyta, Magnoliophyta, Mesangiospermae, eudicotyledons, Gunneridae, Pentapetalae, rosids, malvids, Brassicales, Brassicaceae, Brassiceae, Brassica, Brassica oleracea (Wild cabbage), Brassica oleracea var. oleracea	Predicted	1 out of 5							2015-04-29	2017-07-05
A0A0D7V289	NZ_JYDZ01000074.1:23-632	100	203	0	0	609	1	1	203	5e-117	427.6	A0A0D7V289	A0A0D7V289_CAMJU	unreviewed	Endonuclease (Fragment)	TM42_09285	Campylobacter jejuni subsp. jejuni	210	unreviewed	32022	cellular organisms, Bacteria, Proteobacteria, delta/epsilon subdivisions, Epsilonproteobacteria, Campylobacterales, Campylobacteraceae, Campylobacter, Campylobacter jejuni, Campylobacter jejuni subsp. jejuni	Predicted	1 out of 5	CAUTION: The sequence shown here is derived from an EMBL/GenBank/DDBJ whole genome shotgun (WGS) entry which is preliminary data. {ECO:0000313|EMBL:KJD20941.1}.	Non-terminal residue (2)	JYDZ01000074;				2015-05-27	2015-12-09
A0A0E2IVB9	NZ_KE353545.1:1235-1406	97.83	46	1	0	155	18	1	46	3e-13	81.6	A0A0E2IVB9	A0A0E2IVB9_CHLPS	unreviewed	Nef attachable domain protein	CP01DC11_1502	Chlamydia psittaci 01DC11	46	unreviewed	1112252	cellular organisms, Bacteria, PVC group, Chlamydiae, Chlamydiia, Chlamydiales, Chlamydiaceae, Chlamydia/Chlamydophila group, Chlamydia, Chlamydophila psittaci (Chlamydia psittaci), Chlamydia psittaci 01DC11	Predicted	1 out of 5	CAUTION: The sequence shown here is derived from an EMBL/GenBank/DDBJ whole genome shotgun (WGS) entry which is preliminary data. {ECO:0000313|EMBL:EPJ12885.1}.		ATKP01000350;				2015-05-27	2017-06-07
A0A0E2IVD1	NZ_KE353545.1:207-378	97.83	46	1	0	155	18	1	46	1e-18	99.8	A0A0E2IVD1	A0A0E2IVD1_CHLPS	unreviewed	Nef attachable domain protein	CP01DC11_1499	Chlamydia psittaci 01DC11	46	unreviewed	1112252	cellular organisms, Bacteria, PVC group, Chlamydiae, Chlamydiia, Chlamydiales, Chlamydiaceae, Chlamydia/Chlamydophila group, Chlamydia, Chlamydophila psittaci (Chlamydia psittaci), Chlamydia psittaci 01DC11	Predicted	1 out of 5	CAUTION: The sequence shown here is derived from an EMBL/GenBank/DDBJ whole genome shotgun (WGS) entry which is preliminary data. {ECO:0000313|EMBL:EPJ12882.1}.		ATKP01000350;				2015-05-27	2015-12-09
A0A0E2IVE1	NZ_KE353540.1:1-160	100	47	0	0	3	143	1	47	2e-19	102.1	A0A0E2IVE1	A0A0E2IVE1_CHLPS	unreviewed	Nef attachable domain protein (Fragment)	CP01DC11_1490	Chlamydia psittaci 01DC11	47	unreviewed	1112252	cellular organisms, Bacteria, PVC group, Chlamydiae, Chlamydiia, Chlamydiales, Chlamydiaceae, Chlamydia/Chlamydophila group, Chlamydia, Chlamydophila psittaci (Chlamydia psittaci), Chlamydia psittaci 01DC11	Predicted	1 out of 5	CAUTION: The sequence shown here is derived from an EMBL/GenBank/DDBJ whole genome shotgun (WGS) entry which is preliminary data. {ECO:0000313|EMBL:EPJ12958.1}.	Non-terminal residue (1)	ATKP01000345;				2015-05-27	2015-12-09
A0A0E2IVH5	NZ_KE353511.1:137-308	97.83	46	1	0	155	18	1	46	3e-18	98.2	A0A0E2IVH5	A0A0E2IVH5_CHLPS	unreviewed	Nef attachable domain protein	CP01DC11_1458	Chlamydia psittaci 01DC11	46	unreviewed	1112252	cellular organisms, Bacteria, PVC group, Chlamydiae, Chlamydiia, Chlamydiales, Chlamydiaceae, Chlamydia/Chlamydophila group, Chlamydia, Chlamydophila psittaci (Chlamydia psittaci), Chlamydia psittaci 01DC11	Predicted	1 out of 5	CAUTION: The sequence shown here is derived from an EMBL/GenBank/DDBJ whole genome shotgun (WGS) entry which is preliminary data. {ECO:0000313|EMBL:EPJ15077.1}.		ATKP01000319;				2015-05-27	2017-06-07
A0A0E2IVK2	NZ_KE353493.1:470-641	100	51	0	0	170	18	16	66	2e-21	109	A0A0E2IVK2	A0A0E2IVK2_CHLPS	unreviewed	Nef attachable domain protein	CP01DC11_1435	Chlamydia psittaci 01DC11	66	unreviewed	1112252	cellular organisms, Bacteria, PVC group, Chlamydiae, Chlamydiia, Chlamydiales, Chlamydiaceae, Chlamydia/Chlamydophila group, Chlamydia, Chlamydophila psittaci (Chlamydia psittaci), Chlamydia psittaci 01DC11	Predicted	1 out of 5	CAUTION: The sequence shown here is derived from an EMBL/GenBank/DDBJ whole genome shotgun (WGS) entry which is preliminary data. {ECO:0000313|EMBL:EPJ15176.1}.		ATKP01000298;	WP_020762231.1;			2015-05-27	2017-06-07
A0A0E2IVV1	NZ_FPLY01000008.1:1-148	97.73	44	1	0	132	1	1	44	5e-10	70.9	A0A0E2IVV1	A0A0E2IVV1_CHLPS	unreviewed	Uncharacterized protein	CP01DC11_1498	Chlamydia psittaci 01DC11	44	unreviewed	1112252	cellular organisms, Bacteria, PVC group, Chlamydiae, Chlamydiia, Chlamydiales, Chlamydiaceae, Chlamydia/Chlamydophila group, Chlamydia, Chlamydophila psittaci (Chlamydia psittaci), Chlamydia psittaci 01DC11	Predicted	1 out of 5	CAUTION: The sequence shown here is derived from an EMBL/GenBank/DDBJ whole genome shotgun (WGS) entry which is preliminary data. {ECO:0000313|EMBL:EPJ12881.1}.		ATKP01000350;				2015-05-27	2015-12-09
A0A0E2IVV6	NZ_KE353545.1:1751-1922	100	40	0	0	172	53	11	50	1e-14	86.3	A0A0E2IVV6	A0A0E2IVV6_CHLPS	unreviewed	Nef attachable domain protein (Fragment)	CP01DC11_1503	Chlamydia psittaci 01DC11	50	unreviewed	1112252	cellular organisms, Bacteria, PVC group, Chlamydiae, Chlamydiia, Chlamydiales, Chlamydiaceae, Chlamydia/Chlamydophila group, Chlamydia, Chlamydophila psittaci (Chlamydia psittaci), Chlamydia psittaci 01DC11	Predicted	1 out of 5	CAUTION: The sequence shown here is derived from an EMBL/GenBank/DDBJ whole genome shotgun (WGS) entry which is preliminary data. {ECO:0000313|EMBL:EPJ12886.1}.	Non-terminal residue (1)	ATKP01000350;				2015-05-27	2015-12-09
A0A0E2IVY0	NZ_KE353524.1:38-208	100	36	0	0	169	62	8	43	7e-11	73.6	A0A0E2IVY0	A0A0E2IVY0_CHLPS	unreviewed	Nef attachable domain protein (Fragment)	CP01DC11_1473	Chlamydia psittaci 01DC11	43	unreviewed	1112252	cellular organisms, Bacteria, PVC group, Chlamydiae, Chlamydiia, Chlamydiales, Chlamydiaceae, Chlamydia/Chlamydophila group, Chlamydia, Chlamydophila psittaci (Chlamydia psittaci), Chlamydia psittaci 01DC11	Predicted	1 out of 5	CAUTION: The sequence shown here is derived from an EMBL/GenBank/DDBJ whole genome shotgun (WGS) entry which is preliminary data. {ECO:0000313|EMBL:EPJ14532.1}.	Non-terminal residue (1)	ATKP01000330;				2015-05-27	2015-12-09
A0A0E2IW16	NZ_KE353348.1:35-205	98.04	51	1	0	154	2	1	51	3e-11	74.7	A0A0E2IW16	A0A0E2IW16_CHLPS	unreviewed	Nef attachable domain protein	CP01DC11_1256	Chlamydia psittaci 01DC11	53	unreviewed	1112252	cellular organisms, Bacteria, PVC group, Chlamydiae, Chlamydiia, Chlamydiales, Chlamydiaceae, Chlamydia/Chlamydophila group, Chlamydia, Chlamydophila psittaci (Chlamydia psittaci), Chlamydia psittaci 01DC11	Predicted	1 out of 5	CAUTION: The sequence shown here is derived from an EMBL/GenBank/DDBJ whole genome shotgun (WGS) entry which is preliminary data. {ECO:0000313|EMBL:EPJ16608.1}.		ATKP01000154;				2015-05-27	2015-12-09
A0A0E2IW67	NZ_KE353545.1:891-1062	98.04	51	1	0	155	3	1	51	4e-12	77.8	A0A0E2IW67	A0A0E2IW67_CHLPS	unreviewed	Nef attachable domain protein	CP01DC11_1500	Chlamydia psittaci 01DC11	61	unreviewed	1112252	cellular organisms, Bacteria, PVC group, Chlamydiae, Chlamydiia, Chlamydiales, Chlamydiaceae, Chlamydia/Chlamydophila group, Chlamydia, Chlamydophila psittaci (Chlamydia psittaci), Chlamydia psittaci 01DC11	Predicted	1 out of 5	CAUTION: The sequence shown here is derived from an EMBL/GenBank/DDBJ whole genome shotgun (WGS) entry which is preliminary data. {ECO:0000313|EMBL:EPJ12883.1}.		ATKP01000350;				2015-05-27	2015-12-09
A0A0E2IW77	NZ_KE353540.1:162-330	100	33	0	0	2	100	15	47	7e-09	67	A0A0E2IW77	A0A0E2IW77_CHLPS	unreviewed	Nef attachable domain protein	CP01DC11_1491	Chlamydia psittaci 01DC11	47	unreviewed	1112252	cellular organisms, Bacteria, PVC group, Chlamydiae, Chlamydiia, Chlamydiales, Chlamydiaceae, Chlamydia/Chlamydophila group, Chlamydia, Chlamydophila psittaci (Chlamydia psittaci), Chlamydia psittaci 01DC11	Predicted	1 out of 5	CAUTION: The sequence shown here is derived from an EMBL/GenBank/DDBJ whole genome shotgun (WGS) entry which is preliminary data. {ECO:0000313|EMBL:EPJ12959.1}.		ATKP01000345;				2015-05-27	2017-06-07
A0A0E2IWC8	NZ_KE353493.1:11-182	100	31	0	0	3	95	5	35	8e-08	63.5	A0A0E2IWC8	A0A0E2IWC8_CHLPS	unreviewed	Nef attachable domain protein (Fragment)	CP01DC11_1433	Chlamydia psittaci 01DC11	35	unreviewed	1112252	cellular organisms, Bacteria, PVC group, Chlamydiae, Chlamydiia, Chlamydiales, Chlamydiaceae, Chlamydia/Chlamydophila group, Chlamydia, Chlamydophila psittaci (Chlamydia psittaci), Chlamydia psittaci 01DC11	Predicted	1 out of 5	CAUTION: The sequence shown here is derived from an EMBL/GenBank/DDBJ whole genome shotgun (WGS) entry which is preliminary data. {ECO:0000313|EMBL:EPJ15177.1}.	Non-terminal residue (1); Transmembrane (1)	ATKP01000297;				2015-05-27	2015-12-09
A0A0E2IWD5	NZ_KE353553.1:96-265	100	51	0	0	170	18	1	51	5e-14	84	A0A0E2IWD5	A0A0E2IWD5_CHLPS	unreviewed	Nef attachable domain protein (Fragment)	CP01DC11_1092	Chlamydia psittaci 01DC11	51	unreviewed	1112252	cellular organisms, Bacteria, PVC group, Chlamydiae, Chlamydiia, Chlamydiales, Chlamydiaceae, Chlamydia/Chlamydophila group, Chlamydia, Chlamydophila psittaci (Chlamydia psittaci), Chlamydia psittaci 01DC11	Predicted	1 out of 5	CAUTION: The sequence shown here is derived from an EMBL/GenBank/DDBJ whole genome shotgun (WGS) entry which is preliminary data. {ECO:0000313|EMBL:EPJ17937.1}.	Non-terminal residue (1)	ATKP01000015;				2015-05-27	2015-12-09
A0A0E2IWF3	NZ_BEFH01000109.1:170-1411	100	97	0	0	844	1134	1	97	2e-46	194.9	A0A0E2IWF3	A0A0E2IWF3_CHLPS	unreviewed	Retrovirus-related Pol polyLINE-1 domain protein (EC 2.7.7.49) (Fragment)	CP01DC11_1392	Chlamydia psittaci 01DC11	97	unreviewed	1112252	cellular organisms, Bacteria, PVC group, Chlamydiae, Chlamydiia, Chlamydiales, Chlamydiaceae, Chlamydia/Chlamydophila group, Chlamydia, Chlamydophila psittaci (Chlamydia psittaci), Chlamydia psittaci 01DC11	Predicted	1 out of 5	CAUTION: The sequence shown here is derived from an EMBL/GenBank/DDBJ whole genome shotgun (WGS) entry which is preliminary data. {ECO:0000313|EMBL:EPJ15228.1}.	Coiled coil (1); Non-terminal residue (2)	ATKP01000275;				2015-05-27	2015-12-09
A0A0E2IX39	NZ_KE353579.1:1-234	100	77	0	0	3	233	1	77	3e-34	151.4	A0A0E2IX39	A0A0E2IX39_CHLPS	unreviewed	Retrovirus-related Pol polyLINE-1 domain protein (EC 2.7.7.49) (Fragment)	CP01DC11_1159	Chlamydia psittaci 01DC11	77	unreviewed	1112252	cellular organisms, Bacteria, PVC group, Chlamydiae, Chlamydiia, Chlamydiales, Chlamydiaceae, Chlamydia/Chlamydophila group, Chlamydia, Chlamydophila psittaci (Chlamydia psittaci), Chlamydia psittaci 01DC11	Predicted	1 out of 5	CAUTION: The sequence shown here is derived from an EMBL/GenBank/DDBJ whole genome shotgun (WGS) entry which is preliminary data. {ECO:0000313|EMBL:EPJ17628.1}.	Coiled coil (1); Non-terminal residue (2)	ATKP01000075;				2015-05-27	2015-12-09
A0A0E2IX84	NZ_KE353467.1:52-204	100	35	0	0	153	49	1	35	1e-12	79.3	A0A0E2IX84	A0A0E2IX84_CHLPS	unreviewed	Uncharacterized protein (Fragment)	CP01DC11_1091	Chlamydia psittaci 01DC11	35	unreviewed	1112252	cellular organisms, Bacteria, PVC group, Chlamydiae, Chlamydiia, Chlamydiales, Chlamydiaceae, Chlamydia/Chlamydophila group, Chlamydia, Chlamydophila psittaci (Chlamydia psittaci), Chlamydia psittaci 01DC11	Predicted	1 out of 5	CAUTION: The sequence shown here is derived from an EMBL/GenBank/DDBJ whole genome shotgun (WGS) entry which is preliminary data. {ECO:0000313|EMBL:EPJ17942.1}.	Non-terminal residue (1)	ATKP01000013;				2015-05-27	2015-12-09
A0A0E2J2G4	NZ_KE359997.1:271-441	97.96	49	1	0	163	17	1	49	1e-09	69.3	A0A0E2J2G4	A0A0E2J2G4_CHLPS	unreviewed	Nef attachable domain protein (Fragment)	CP02DC14_2380	Chlamydia psittaci 02DC14	49	unreviewed	1112253	cellular organisms, Bacteria, PVC group, Chlamydiae, Chlamydiia, Chlamydiales, Chlamydiaceae, Chlamydia/Chlamydophila group, Chlamydia, Chlamydophila psittaci (Chlamydia psittaci), Chlamydia psittaci 02DC14	Predicted	1 out of 5	CAUTION: The sequence shown here is derived from an EMBL/GenBank/DDBJ whole genome shotgun (WGS) entry which is preliminary data. {ECO:0000313|EMBL:EPL00628.1}.	Non-terminal residue (1)	ATMU01000489;				2015-05-27	2018-09-12
A0A0E2J2M9	NZ_KE355616.1:197-368	97.83	46	1	0	155	18	1	46	2e-19	102.1	A0A0E2J2M9	A0A0E2J2M9_CHLPS	unreviewed	Nef attachable domain protein	CP02DC14_2248	Chlamydia psittaci 02DC14	46	unreviewed	1112253	cellular organisms, Bacteria, PVC group, Chlamydiae, Chlamydiia, Chlamydiales, Chlamydiaceae, Chlamydia/Chlamydophila group, Chlamydia, Chlamydophila psittaci (Chlamydia psittaci), Chlamydia psittaci 02DC14	Predicted	1 out of 5	CAUTION: The sequence shown here is derived from an EMBL/GenBank/DDBJ whole genome shotgun (WGS) entry which is preliminary data. {ECO:0000313|EMBL:EPL01675.1}.		ATMU01000442;				2015-05-27	2018-09-12
A0A0E2J2N8	NZ_KE355704.1:528-675	97.06	34	1	0	119	18	4	37	2e-11	75.9	A0A0E2J2N8	A0A0E2J2N8_CHLPS	unreviewed	Uncharacterized protein (Fragment)	CP02DC14_2301	Chlamydia psittaci 02DC14	37	unreviewed	1112253	cellular organisms, Bacteria, PVC group, Chlamydiae, Chlamydiia, Chlamydiales, Chlamydiaceae, Chlamydia/Chlamydophila group, Chlamydia, Chlamydophila psittaci (Chlamydia psittaci), Chlamydia psittaci 02DC14	Predicted	1 out of 5	CAUTION: The sequence shown here is derived from an EMBL/GenBank/DDBJ whole genome shotgun (WGS) entry which is preliminary data. {ECO:0000313|EMBL:EPL00685.1}.	Non-terminal residue (1)	ATMU01000465;				2015-05-27	2018-09-12
A0A0E2J2P0	NZ_KE355704.1:777-947	97.83	46	1	0	154	17	1	46	6e-11	73.9	A0A0E2J2P0	A0A0E2J2P0_CHLPS	unreviewed	Nef attachable domain protein	CP02DC14_2235	Chlamydia psittaci 02DC14	46	unreviewed	1112253	cellular organisms, Bacteria, PVC group, Chlamydiae, Chlamydiia, Chlamydiales, Chlamydiaceae, Chlamydia/Chlamydophila group, Chlamydia, Chlamydophila psittaci (Chlamydia psittaci), Chlamydia psittaci 02DC14	Predicted	1 out of 5	CAUTION: The sequence shown here is derived from an EMBL/GenBank/DDBJ whole genome shotgun (WGS) entry which is preliminary data. {ECO:0000313|EMBL:EPL01693.1}.		ATMU01000437;				2015-05-27	2018-09-12
A0A0E2J2Q4	NZ_KE355523.1:448-619	97.83	46	1	0	155	18	1	46	2e-18	98.6	A0A0E2J2Q4	A0A0E2J2Q4_CHLPS	unreviewed	Nef attachable domain protein	CP02DC14_2214	Chlamydia psittaci 02DC14	46	unreviewed	1112253	cellular organisms, Bacteria, PVC group, Chlamydiae, Chlamydiia, Chlamydiales, Chlamydiaceae, Chlamydia/Chlamydophila group, Chlamydia, Chlamydophila psittaci (Chlamydia psittaci), Chlamydia psittaci 02DC14	Predicted	1 out of 5	CAUTION: The sequence shown here is derived from an EMBL/GenBank/DDBJ whole genome shotgun (WGS) entry which is preliminary data. {ECO:0000313|EMBL:EPL01742.1}.		ATMU01000427;				2015-05-27	2018-09-12
A0A0E2J2R8	NZ_KE360056.1:785-953	95.65	46	2	0	16	153	1	46	2e-17	95.1	A0A0E2J2R8	A0A0E2J2R8_CHLPS	unreviewed	Nef attachable domain protein	CP02DC14_2237	Chlamydia psittaci 02DC14	46	unreviewed	1112253	cellular organisms, Bacteria, PVC group, Chlamydiae, Chlamydiia, Chlamydiales, Chlamydiaceae, Chlamydia/Chlamydophila group, Chlamydia, Chlamydophila psittaci (Chlamydia psittaci), Chlamydia psittaci 02DC14	Predicted	1 out of 5	CAUTION: The sequence shown here is derived from an EMBL/GenBank/DDBJ whole genome shotgun (WGS) entry which is preliminary data. {ECO:0000313|EMBL:EPL01690.1}.		ATMU01000438;				2015-05-27	2018-09-12
A0A0E2J2U2	NZ_KE355536.1:296-453	97.83	46	1	0	155	18	1	46	2e-18	99	A0A0E2J2U2	A0A0E2J2U2_CHLPS	unreviewed	Nef attachable domain protein	CP02DC14_2175	Chlamydia psittaci 02DC14	46	unreviewed	1112253	cellular organisms, Bacteria, PVC group, Chlamydiae, Chlamydiia, Chlamydiales, Chlamydiaceae, Chlamydia/Chlamydophila group, Chlamydia, Chlamydophila psittaci (Chlamydia psittaci), Chlamydia psittaci 02DC14	Predicted	1 out of 5	CAUTION: The sequence shown here is derived from an EMBL/GenBank/DDBJ whole genome shotgun (WGS) entry which is preliminary data. {ECO:0000313|EMBL:EPL01788.1}.		ATMU01000414;				2015-05-27	2018-09-12
A0A0E2J2W9	NZ_KE355586.1:444-614	100	38	0	0	170	57	15	52	8e-13	80.1	A0A0E2J2W9	A0A0E2J2W9_CHLPS	unreviewed	Uncharacterized protein	CP02DC14_2173	Chlamydia psittaci 02DC14	52	unreviewed	1112253	cellular organisms, Bacteria, PVC group, Chlamydiae, Chlamydiia, Chlamydiales, Chlamydiaceae, Chlamydia/Chlamydophila group, Chlamydia, Chlamydophila psittaci (Chlamydia psittaci), Chlamydia psittaci 02DC14	Predicted	1 out of 5	CAUTION: The sequence shown here is derived from an EMBL/GenBank/DDBJ whole genome shotgun (WGS) entry which is preliminary data. {ECO:0000313|EMBL:EPL01786.1}.	Transmembrane (1)	ATMU01000414;				2015-05-27	2018-09-12
A0A0E2J331	NZ_KE355568.1:37-207	97.92	48	1	0	27	170	1	48	1e-17	96.3	A0A0E2J331	A0A0E2J331_CHLPS	unreviewed	Uncharacterized protein	CP02DC14_2072	Chlamydia psittaci 02DC14	50	unreviewed	1112253	cellular organisms, Bacteria, PVC group, Chlamydiae, Chlamydiia, Chlamydiales, Chlamydiaceae, Chlamydia/Chlamydophila group, Chlamydia, Chlamydophila psittaci (Chlamydia psittaci), Chlamydia psittaci 02DC14	Predicted	1 out of 5	CAUTION: The sequence shown here is derived from an EMBL/GenBank/DDBJ whole genome shotgun (WGS) entry which is preliminary data. {ECO:0000313|EMBL:EPL01972.1}.		ATMU01000374;				2015-05-27	2018-09-12
A0A0E2J338	NZ_KE360022.1:105-271	97.3	37	1	0	18	128	1	37	2e-12	79	A0A0E2J338	A0A0E2J338_CHLPS	unreviewed	Putative nef attachable protein	CP02DC14_1949	Chlamydia psittaci 02DC14	37	unreviewed	1112253	cellular organisms, Bacteria, PVC group, Chlamydiae, Chlamydiia, Chlamydiales, Chlamydiaceae, Chlamydia/Chlamydophila group, Chlamydia, Chlamydophila psittaci (Chlamydia psittaci), Chlamydia psittaci 02DC14	Predicted	1 out of 5	CAUTION: The sequence shown here is derived from an EMBL/GenBank/DDBJ whole genome shotgun (WGS) entry which is preliminary data. {ECO:0000313|EMBL:EPL02287.1}.		ATMU01000332;				2015-05-27	2018-09-12
A0A0E2J342	NZ_KE353699.1:94-265	100	31	0	0	170	78	11	41	3e-08	64.7	A0A0E2J342	A0A0E2J342_CHLPS	unreviewed	Nef attachable domain protein (Fragment)	CP02DC14_1944	Chlamydia psittaci 02DC14	41	unreviewed	1112253	cellular organisms, Bacteria, PVC group, Chlamydiae, Chlamydiia, Chlamydiales, Chlamydiaceae, Chlamydia/Chlamydophila group, Chlamydia, Chlamydophila psittaci (Chlamydia psittaci), Chlamydia psittaci 02DC14	Predicted	1 out of 5	CAUTION: The sequence shown here is derived from an EMBL/GenBank/DDBJ whole genome shotgun (WGS) entry which is preliminary data. {ECO:0000313|EMBL:EPL02301.1}.	Non-terminal residue (1)	ATMU01000329;				2015-05-27	2018-09-12
A0A0E2J352	NZ_KE355616.1:913-1068	97.3	37	1	0	139	29	1	37	1e-12	79.3	A0A0E2J352	A0A0E2J352_CHLPS	unreviewed	Uncharacterized protein	CP02DC14_1919	Chlamydia psittaci 02DC14	37	unreviewed	1112253	cellular organisms, Bacteria, PVC group, Chlamydiae, Chlamydiia, Chlamydiales, Chlamydiaceae, Chlamydia/Chlamydophila group, Chlamydia, Chlamydophila psittaci (Chlamydia psittaci), Chlamydia psittaci 02DC14	Predicted	1 out of 5	CAUTION: The sequence shown here is derived from an EMBL/GenBank/DDBJ whole genome shotgun (WGS) entry which is preliminary data. {ECO:0000313|EMBL:EPL02338.1}.		ATMU01000319;				2015-05-27	2018-09-12
A0A0E2J378	NZ_KE355704.1:357-527	97.06	34	1	0	155	54	1	34	6e-11	73.9	A0A0E2J378	A0A0E2J378_CHLPS	unreviewed	Nef attachable domain protein (Fragment)	CP02DC14_2302A	Chlamydia psittaci 02DC14	34	unreviewed	1112253	cellular organisms, Bacteria, PVC group, Chlamydiae, Chlamydiia, Chlamydiales, Chlamydiaceae, Chlamydia/Chlamydophila group, Chlamydia, Chlamydophila psittaci (Chlamydia psittaci), Chlamydia psittaci 02DC14	Predicted	1 out of 5	CAUTION: The sequence shown here is derived from an EMBL/GenBank/DDBJ whole genome shotgun (WGS) entry which is preliminary data. {ECO:0000313|EMBL:EPL00686.1}.	Non-terminal residue (1)	ATMU01000465;				2015-05-27	2018-09-12
A0A0E2J389	NZ_KE359969.1:13-184	100	41	0	0	2	124	12	52	1e-16	92.8	A0A0E2J389	A0A0E2J389_CHLPS	unreviewed	Nef attachable domain protein (Fragment)	CP02DC14_2281	Chlamydia psittaci 02DC14	52	unreviewed	1112253	cellular organisms, Bacteria, PVC group, Chlamydiae, Chlamydiia, Chlamydiales, Chlamydiaceae, Chlamydia/Chlamydophila group, Chlamydia, Chlamydophila psittaci (Chlamydia psittaci), Chlamydia psittaci 02DC14	Predicted	1 out of 5	CAUTION: The sequence shown here is derived from an EMBL/GenBank/DDBJ whole genome shotgun (WGS) entry which is preliminary data. {ECO:0000313|EMBL:EPL01332.1}.	Non-terminal residue (1)	ATMU01000452;				2015-05-27	2018-09-12
A0A0E2J3A2	NZ_KE356131.1:121-289	100	31	0	0	169	77	50	80	1e-08	66.2	A0A0E2J3A2	A0A0E2J3A2_CHLPS	unreviewed	Uncharacterized protein (Fragment)	CP02DC14_1809	Chlamydia psittaci 02DC14	80	unreviewed	1112253	cellular organisms, Bacteria, PVC group, Chlamydiae, Chlamydiia, Chlamydiales, Chlamydiaceae, Chlamydia/Chlamydophila group, Chlamydia, Chlamydophila psittaci (Chlamydia psittaci), Chlamydia psittaci 02DC14	Predicted	1 out of 5	CAUTION: The sequence shown here is derived from an EMBL/GenBank/DDBJ whole genome shotgun (WGS) entry which is preliminary data. {ECO:0000313|EMBL:EPL02536.1}.	Non-terminal residue (2); Transmembrane (1)	ATMU01000282;				2015-05-27	2018-09-12
A0A0E2J3C3	NZ_KE355523.1:277-447	97.83	46	1	0	154	17	1	46	3e-18	98.2	A0A0E2J3C3	A0A0E2J3C3_CHLPS	unreviewed	Nef attachable domain protein	CP02DC14_2213	Chlamydia psittaci 02DC14	46	unreviewed	1112253	cellular organisms, Bacteria, PVC group, Chlamydiae, Chlamydiia, Chlamydiales, Chlamydiaceae, Chlamydia/Chlamydophila group, Chlamydia, Chlamydophila psittaci (Chlamydia psittaci), Chlamydia psittaci 02DC14	Predicted	1 out of 5	CAUTION: The sequence shown here is derived from an EMBL/GenBank/DDBJ whole genome shotgun (WGS) entry which is preliminary data. {ECO:0000313|EMBL:EPL01741.1}.		ATMU01000427;				2015-05-27	2018-09-12
A0A0E2J3C4	NZ_KE355586.1:103-272	97.83	46	1	0	16	153	1	46	2e-18	99	A0A0E2J3C4	A0A0E2J3C4_CHLPS	unreviewed	Nef attachable domain protein	CP02DC14_1852	Chlamydia psittaci 02DC14	46	unreviewed	1112253	cellular organisms, Bacteria, PVC group, Chlamydiae, Chlamydiia, Chlamydiales, Chlamydiaceae, Chlamydia/Chlamydophila group, Chlamydia, Chlamydophila psittaci (Chlamydia psittaci), Chlamydia psittaci 02DC14	Predicted	1 out of 5	CAUTION: The sequence shown here is derived from an EMBL/GenBank/DDBJ whole genome shotgun (WGS) entry which is preliminary data. {ECO:0000313|EMBL:EPL02447.1}.		ATMU01000297;				2015-05-27	2018-09-12
A0A0E2J3D1	NZ_KE356135.1:261-432	100	46	0	0	155	18	1	46	1e-18	99.4	A0A0E2J3D1	A0A0E2J3D1_CHLPS	unreviewed	Putative nef attachable protein (Fragment)	CP02DC14_1744	Chlamydia psittaci 02DC14	46	unreviewed	1112253	cellular organisms, Bacteria, PVC group, Chlamydiae, Chlamydiia, Chlamydiales, Chlamydiaceae, Chlamydia/Chlamydophila group, Chlamydia, Chlamydophila psittaci (Chlamydia psittaci), Chlamydia psittaci 02DC14	Predicted	1 out of 5	CAUTION: The sequence shown here is derived from an EMBL/GenBank/DDBJ whole genome shotgun (WGS) entry which is preliminary data. {ECO:0000313|EMBL:EPL02691.1}.	Non-terminal residue (1)	ATMU01000259;				2015-05-27	2018-09-12
A0A0E2J3D8	NZ_KE355842.1:150-321	100	41	0	0	2	124	15	55	2e-16	92.4	A0A0E2J3D8	A0A0E2J3D8_CHLPS	unreviewed	Uncharacterized protein	CP02DC14_2377	Chlamydia psittaci 02DC14	55	unreviewed	1112253	cellular organisms, Bacteria, PVC group, Chlamydiae, Chlamydiia, Chlamydiales, Chlamydiaceae, Chlamydia/Chlamydophila group, Chlamydia, Chlamydophila psittaci (Chlamydia psittaci), Chlamydia psittaci 02DC14	Predicted	1 out of 5	CAUTION: The sequence shown here is derived from an EMBL/GenBank/DDBJ whole genome shotgun (WGS) entry which is preliminary data. {ECO:0000313|EMBL:EPL00631.1}.		ATMU01000488;				2015-05-27	2018-09-12
A0A0E2J3G3	NZ_FPLY01000008.1:1-148	97.73	44	1	0	132	1	1	44	5e-10	70.9	A0A0E2J3G3	A0A0E2J3G3_CHLPS	unreviewed	Uncharacterized protein	CP02DC14_1742	Chlamydia psittaci 02DC14	44	unreviewed	1112253	cellular organisms, Bacteria, PVC group, Chlamydiae, Chlamydiia, Chlamydiales, Chlamydiaceae, Chlamydia/Chlamydophila group, Chlamydia, Chlamydophila psittaci (Chlamydia psittaci), Chlamydia psittaci 02DC14	Predicted	1 out of 5	CAUTION: The sequence shown here is derived from an EMBL/GenBank/DDBJ whole genome shotgun (WGS) entry which is preliminary data. {ECO:0000313|EMBL:EPL02697.1}.		ATMU01000258;				2015-05-27	2018-09-12
A0A0E2J3G5	NZ_KE359997.1:2028-2199	100	41	0	0	2	124	15	73	5e-13	80.9	A0A0E2J3G5	A0A0E2J3G5_CHLPS	unreviewed	Uncharacterized protein	CP02DC14_2174	Chlamydia psittaci 02DC14	73	unreviewed	1112253	cellular organisms, Bacteria, PVC group, Chlamydiae, Chlamydiia, Chlamydiales, Chlamydiaceae, Chlamydia/Chlamydophila group, Chlamydia, Chlamydophila psittaci (Chlamydia psittaci), Chlamydia psittaci 02DC14	Predicted	1 out of 5	CAUTION: The sequence shown here is derived from an EMBL/GenBank/DDBJ whole genome shotgun (WGS) entry which is preliminary data. {ECO:0000313|EMBL:EPL01787.1}.		ATMU01000414;				2015-05-27	2018-09-12
A0A0E2J3I6	NZ_KE353545.1:891-1062	100	54	0	0	164	3	1	54	5e-14	84	A0A0E2J3I6	A0A0E2J3I6_CHLPS	unreviewed	Nef attachable domain protein (Fragment)	CP02DC14_2298	Chlamydia psittaci 02DC14	64	unreviewed	1112253	cellular organisms, Bacteria, PVC group, Chlamydiae, Chlamydiia, Chlamydiales, Chlamydiaceae, Chlamydia/Chlamydophila group, Chlamydia, Chlamydophila psittaci (Chlamydia psittaci), Chlamydia psittaci 02DC14	Predicted	1 out of 5	CAUTION: The sequence shown here is derived from an EMBL/GenBank/DDBJ whole genome shotgun (WGS) entry which is preliminary data. {ECO:0000313|EMBL:EPL00688.1}.	Non-terminal residue (1)	ATMU01000462;				2015-05-27	2018-09-12
A0A0E2J3L0	NZ_KE355836.1:1000-1156	100	51	0	0	157	5	14	64	9e-20	103.2	A0A0E2J3L0	A0A0E2J3L0_CHLPS	unreviewed	Nef attachable domain protein (Fragment)	CP02DC14_1554A	Chlamydia psittaci 02DC14	64	unreviewed	1112253	cellular organisms, Bacteria, PVC group, Chlamydiae, Chlamydiia, Chlamydiales, Chlamydiaceae, Chlamydia/Chlamydophila group, Chlamydia, Chlamydophila psittaci (Chlamydia psittaci), Chlamydia psittaci 02DC14	Predicted	1 out of 5	CAUTION: The sequence shown here is derived from an EMBL/GenBank/DDBJ whole genome shotgun (WGS) entry which is preliminary data. {ECO:0000313|EMBL:EPL02947.1}.	Non-terminal residue (1)	ATMU01000194;				2015-05-27	2018-09-12
A0A0E2J3L5	NZ_KE353622.1:239-393	97.83	46	1	0	154	17	1	46	5e-13	80.9	A0A0E2J3L5	A0A0E2J3L5_CHLPS	unreviewed	Nef attachable domain protein	CP02DC14_1552	Chlamydia psittaci 02DC14	46	unreviewed	1112253	cellular organisms, Bacteria, PVC group, Chlamydiae, Chlamydiia, Chlamydiales, Chlamydiaceae, Chlamydia/Chlamydophila group, Chlamydia, Chlamydophila psittaci (Chlamydia psittaci), Chlamydia psittaci 02DC14	Predicted	1 out of 5	CAUTION: The sequence shown here is derived from an EMBL/GenBank/DDBJ whole genome shotgun (WGS) entry which is preliminary data. {ECO:0000313|EMBL:EPL02952.1}.		ATMU01000193;				2015-05-27	2018-09-12
A0A0E2J3N4	NZ_KE356110.1:1-170	97.56	41	1	0	169	47	15	55	2e-14	85.1	A0A0E2J3N4	A0A0E2J3N4_CHLPS	unreviewed	Uncharacterized protein (Fragment)	CP02DC14_2215A	Chlamydia psittaci 02DC14	55	unreviewed	1112253	cellular organisms, Bacteria, PVC group, Chlamydiae, Chlamydiia, Chlamydiales, Chlamydiaceae, Chlamydia/Chlamydophila group, Chlamydia, Chlamydophila psittaci (Chlamydia psittaci), Chlamydia psittaci 02DC14	Predicted	1 out of 5	CAUTION: The sequence shown here is derived from an EMBL/GenBank/DDBJ whole genome shotgun (WGS) entry which is preliminary data. {ECO:0000313|EMBL:EPL01743.1}.	Non-terminal residue (1)	ATMU01000427;				2015-05-27	2018-09-12
A0A0E2J3P5	NZ_KE353653.1:81-251	100	38	0	0	149	36	1	38	1e-14	86.3	A0A0E2J3P5	A0A0E2J3P5_CHLPS	unreviewed	Nef attachable domain protein (Fragment)	CP02DC14_1550	Chlamydia psittaci 02DC14	38	unreviewed	1112253	cellular organisms, Bacteria, PVC group, Chlamydiae, Chlamydiia, Chlamydiales, Chlamydiaceae, Chlamydia/Chlamydophila group, Chlamydia, Chlamydophila psittaci (Chlamydia psittaci), Chlamydia psittaci 02DC14	Predicted	1 out of 5	CAUTION: The sequence shown here is derived from an EMBL/GenBank/DDBJ whole genome shotgun (WGS) entry which is preliminary data. {ECO:0000313|EMBL:EPL02959.1}.	Non-terminal residue (1)	ATMU01000192;				2015-05-27	2018-09-12
A0A0E2J3S1	NZ_KE355536.1:124-295	98.04	51	1	0	155	3	1	51	1e-21	109.4	A0A0E2J3S1	A0A0E2J3S1_CHLPS	unreviewed	Nef attachable domain protein	CP02DC14_2176	Chlamydia psittaci 02DC14	61	unreviewed	1112253	cellular organisms, Bacteria, PVC group, Chlamydiae, Chlamydiia, Chlamydiales, Chlamydiaceae, Chlamydia/Chlamydophila group, Chlamydia, Chlamydophila psittaci (Chlamydia psittaci), Chlamydia psittaci 02DC14	Predicted	1 out of 5	CAUTION: The sequence shown here is derived from an EMBL/GenBank/DDBJ whole genome shotgun (WGS) entry which is preliminary data. {ECO:0000313|EMBL:EPL01789.1}.		ATMU01000414;				2015-05-27	2018-09-12
A0A0E2J3S4	NZ_KE355945.1:396-566	98.04	51	1	0	18	170	1	51	7e-17	93.6	A0A0E2J3S4	A0A0E2J3S4_CHLPS	unreviewed	Putative nef attachable protein	CP02DC14_1922	Chlamydia psittaci 02DC14	53	unreviewed	1112253	cellular organisms, Bacteria, PVC group, Chlamydiae, Chlamydiia, Chlamydiales, Chlamydiaceae, Chlamydia/Chlamydophila group, Chlamydia, Chlamydophila psittaci (Chlamydia psittaci), Chlamydia psittaci 02DC14	Predicted	1 out of 5	CAUTION: The sequence shown here is derived from an EMBL/GenBank/DDBJ whole genome shotgun (WGS) entry which is preliminary data. {ECO:0000313|EMBL:EPL02333.1}.		ATMU01000320;				2015-05-27	2018-09-12
A0A0E2J3W2	NZ_KE355453.1:1-141	96.88	32	1	0	124	29	1	32	1e-09	69.7	A0A0E2J3W2	A0A0E2J3W2_CHLPS	unreviewed	Nef attachable domain protein (Fragment)	CP02DC14_2093	Chlamydia psittaci 02DC14	32	unreviewed	1112253	cellular organisms, Bacteria, PVC group, Chlamydiae, Chlamydiia, Chlamydiales, Chlamydiaceae, Chlamydia/Chlamydophila group, Chlamydia, Chlamydophila psittaci (Chlamydia psittaci), Chlamydia psittaci 02DC14	Predicted	1 out of 5	CAUTION: The sequence shown here is derived from an EMBL/GenBank/DDBJ whole genome shotgun (WGS) entry which is preliminary data. {ECO:0000313|EMBL:EPL01927.1}.	Non-terminal residue (1)	ATMU01000387;				2015-05-27	2018-09-12
A0A0E2J3Y6	NZ_KE353511.1:137-308	97.83	46	1	0	155	18	1	46	3e-18	98.2	A0A0E2J3Y6	A0A0E2J3Y6_CHLPS	unreviewed	Nef attachable domain protein	CP02DC14_1335	Chlamydia psittaci 02DC14	46	unreviewed	1112253	cellular organisms, Bacteria, PVC group, Chlamydiae, Chlamydiia, Chlamydiales, Chlamydiaceae, Chlamydia/Chlamydophila group, Chlamydia, Chlamydophila psittaci (Chlamydia psittaci), Chlamydia psittaci 02DC14	Predicted	1 out of 5	CAUTION: The sequence shown here is derived from an EMBL/GenBank/DDBJ whole genome shotgun (WGS) entry which is preliminary data. {ECO:0000313|EMBL:EPL03246.1}.		ATMU01000111;				2015-05-27	2018-09-12
A0A0E2J401	NZ_KE359935.1:1-152	95.35	43	2	0	130	2	1	43	2e-15	89	A0A0E2J401	A0A0E2J401_CHLPS	unreviewed	Nef attachable domain protein (Fragment)	CP02DC14_1747	Chlamydia psittaci 02DC14	44	unreviewed	1112253	cellular organisms, Bacteria, PVC group, Chlamydiae, Chlamydiia, Chlamydiales, Chlamydiaceae, Chlamydia/Chlamydophila group, Chlamydia, Chlamydophila psittaci (Chlamydia psittaci), Chlamydia psittaci 02DC14	Predicted	1 out of 5	CAUTION: The sequence shown here is derived from an EMBL/GenBank/DDBJ whole genome shotgun (WGS) entry which is preliminary data. {ECO:0000313|EMBL:EPL02690.1}.	Non-terminal residue (1)	ATMU01000260;				2015-05-27	2018-09-12
A0A0E2J405	NZ_KE353493.1:11-182	97.83	46	1	0	155	18	1	46	7e-19	100.1	A0A0E2J405	A0A0E2J405_CHLPS	unreviewed	Nef attachable domain protein	CP02DC14_1988	Chlamydia psittaci 02DC14	46	unreviewed	1112253	cellular organisms, Bacteria, PVC group, Chlamydiae, Chlamydiia, Chlamydiales, Chlamydiaceae, Chlamydia/Chlamydophila group, Chlamydia, Chlamydophila psittaci (Chlamydia psittaci), Chlamydia psittaci 02DC14	Predicted	1 out of 5	CAUTION: The sequence shown here is derived from an EMBL/GenBank/DDBJ whole genome shotgun (WGS) entry which is preliminary data. {ECO:0000313|EMBL:EPL02258.1}.		ATMU01000340;				2015-05-27	2018-09-12
A0A0E2J406	NZ_KE353545.1:207-378	97.83	46	1	0	155	18	1	46	1e-18	99.8	A0A0E2J406	A0A0E2J406_CHLPS	unreviewed	Putative nef attachable protein	CP02DC14_1743	Chlamydia psittaci 02DC14	46	unreviewed	1112253	cellular organisms, Bacteria, PVC group, Chlamydiae, Chlamydiia, Chlamydiales, Chlamydiaceae, Chlamydia/Chlamydophila group, Chlamydia, Chlamydophila psittaci (Chlamydia psittaci), Chlamydia psittaci 02DC14	Predicted	1 out of 5	CAUTION: The sequence shown here is derived from an EMBL/GenBank/DDBJ whole genome shotgun (WGS) entry which is preliminary data. {ECO:0000313|EMBL:EPL02698.1}.		ATMU01000258;				2015-05-27	2018-09-12
A0A0E2J407	NZ_KE353545.1:1063-1232	97.83	46	1	0	155	18	1	46	4e-11	74.3	A0A0E2J407	A0A0E2J407_CHLPS	unreviewed	Nef attachable domain protein	CP02DC14_1295	Chlamydia psittaci 02DC14	46	unreviewed	1112253	cellular organisms, Bacteria, PVC group, Chlamydiae, Chlamydiia, Chlamydiales, Chlamydiaceae, Chlamydia/Chlamydophila group, Chlamydia, Chlamydophila psittaci (Chlamydia psittaci), Chlamydia psittaci 02DC14	Predicted	1 out of 5	CAUTION: The sequence shown here is derived from an EMBL/GenBank/DDBJ whole genome shotgun (WGS) entry which is preliminary data. {ECO:0000313|EMBL:EPL04177.1}.		ATMU01000088;				2015-05-27	2018-09-12
A0A0E2J443	NZ_KE355906.1:101-271	97.83	46	1	0	155	18	1	46	8e-18	96.7	A0A0E2J443	A0A0E2J443_CHLPS	unreviewed	Nef attachable domain protein	CP02DC14_1196	Chlamydia psittaci 02DC14	46	unreviewed	1112253	cellular organisms, Bacteria, PVC group, Chlamydiae, Chlamydiia, Chlamydiales, Chlamydiaceae, Chlamydia/Chlamydophila group, Chlamydia, Chlamydophila psittaci (Chlamydia psittaci), Chlamydia psittaci 02DC14	Predicted	1 out of 5	CAUTION: The sequence shown here is derived from an EMBL/GenBank/DDBJ whole genome shotgun (WGS) entry which is preliminary data. {ECO:0000313|EMBL:EPL05602.1}.		ATMU01000045;				2015-05-27	2018-09-12
A0A0E2J449	NZ_KE355449.1:51-221	100	49	0	0	170	24	19	67	2e-15	89	A0A0E2J449	A0A0E2J449_CHLPS	unreviewed	Nef attachable domain protein (Fragment)	CP02DC14_1623	Chlamydia psittaci 02DC14	67	unreviewed	1112253	cellular organisms, Bacteria, PVC group, Chlamydiae, Chlamydiia, Chlamydiales, Chlamydiaceae, Chlamydia/Chlamydophila group, Chlamydia, Chlamydophila psittaci (Chlamydia psittaci), Chlamydia psittaci 02DC14	Predicted	1 out of 5	CAUTION: The sequence shown here is derived from an EMBL/GenBank/DDBJ whole genome shotgun (WGS) entry which is preliminary data. {ECO:0000313|EMBL:EPL02817.1}.	Non-terminal residue (1)	ATMU01000215;				2015-05-27	2018-09-12
A0A0E2J453	NZ_KE353524.1:38-208	97.67	43	1	0	17	145	1	43	3e-17	94.7	A0A0E2J453	A0A0E2J453_CHLPS	unreviewed	Nef attachable domain protein	CP02DC14_1619	Chlamydia psittaci 02DC14	52	unreviewed	1112253	cellular organisms, Bacteria, PVC group, Chlamydiae, Chlamydiia, Chlamydiales, Chlamydiaceae, Chlamydia/Chlamydophila group, Chlamydia, Chlamydophila psittaci (Chlamydia psittaci), Chlamydia psittaci 02DC14	Predicted	1 out of 5	CAUTION: The sequence shown here is derived from an EMBL/GenBank/DDBJ whole genome shotgun (WGS) entry which is preliminary data. {ECO:0000313|EMBL:EPL02831.1}.		ATMU01000213;				2015-05-27	2018-09-12
A0A0E2J465	NZ_KE355859.1:8-179	100	47	0	0	171	31	15	61	8e-21	106.7	A0A0E2J465	A0A0E2J465_CHLPS	unreviewed	Uncharacterized protein	CP02DC14_1162	Chlamydia psittaci 02DC14	61	unreviewed	1112253	cellular organisms, Bacteria, PVC group, Chlamydiae, Chlamydiia, Chlamydiales, Chlamydiaceae, Chlamydia/Chlamydophila group, Chlamydia, Chlamydophila psittaci (Chlamydia psittaci), Chlamydia psittaci 02DC14	Predicted	1 out of 5	CAUTION: The sequence shown here is derived from an EMBL/GenBank/DDBJ whole genome shotgun (WGS) entry which is preliminary data. {ECO:0000313|EMBL:EPL05716.1}.		ATMU01000021;				2015-05-27	2018-09-12
A0A0E2J483	NZ_KE355836.1:153-323	97.83	46	1	0	154	17	1	46	1e-18	99.8	A0A0E2J483	A0A0E2J483_CHLPS	unreviewed	Nef attachable domain protein	CP02DC14_1551	Chlamydia psittaci 02DC14	46	unreviewed	1112253	cellular organisms, Bacteria, PVC group, Chlamydiae, Chlamydiia, Chlamydiales, Chlamydiaceae, Chlamydia/Chlamydophila group, Chlamydia, Chlamydophila psittaci (Chlamydia psittaci), Chlamydia psittaci 02DC14	Predicted	1 out of 5	CAUTION: The sequence shown here is derived from an EMBL/GenBank/DDBJ whole genome shotgun (WGS) entry which is preliminary data. {ECO:0000313|EMBL:EPL02960.1}.		ATMU01000192;				2015-05-27	2018-09-12
A0A0E2J4A0	NZ_KE355566.1:160-330	97.83	46	1	0	18	155	1	46	6e-19	100.5	A0A0E2J4A0	A0A0E2J4A0_CHLPS	unreviewed	Nef attachable domain protein	CP02DC14_1733	Chlamydia psittaci 02DC14	46	unreviewed	1112253	cellular organisms, Bacteria, PVC group, Chlamydiae, Chlamydiia, Chlamydiales, Chlamydiaceae, Chlamydia/Chlamydophila group, Chlamydia, Chlamydophila psittaci (Chlamydia psittaci), Chlamydia psittaci 02DC14	Predicted	1 out of 5	CAUTION: The sequence shown here is derived from an EMBL/GenBank/DDBJ whole genome shotgun (WGS) entry which is preliminary data. {ECO:0000313|EMBL:EPL02702.1}.		ATMU01000257;				2015-05-27	2018-09-12
A0A0E2J4D1	NZ_KE355705.1:44-215	97.83	46	1	0	155	18	1	46	4e-19	100.9	A0A0E2J4D1	A0A0E2J4D1_CHLPS	unreviewed	Nef attachable domain protein	CP02DC14_1644	Chlamydia psittaci 02DC14	46	unreviewed	1112253	cellular organisms, Bacteria, PVC group, Chlamydiae, Chlamydiia, Chlamydiales, Chlamydiaceae, Chlamydia/Chlamydophila group, Chlamydia, Chlamydophila psittaci (Chlamydia psittaci), Chlamydia psittaci 02DC14	Predicted	1 out of 5	CAUTION: The sequence shown here is derived from an EMBL/GenBank/DDBJ whole genome shotgun (WGS) entry which is preliminary data. {ECO:0000313|EMBL:EPL02787.1}.		ATMU01000221;				2015-05-27	2018-09-12
A0A0E2J4H0	NZ_KE353348.1:35-205	98.04	51	1	0	154	2	1	51	3e-11	74.7	A0A0E2J4H0	A0A0E2J4H0_CHLPS	unreviewed	Nef attachable domain protein	CP02DC14_1555	Chlamydia psittaci 02DC14	53	unreviewed	1112253	cellular organisms, Bacteria, PVC group, Chlamydiae, Chlamydiia, Chlamydiales, Chlamydiaceae, Chlamydia/Chlamydophila group, Chlamydia, Chlamydophila psittaci (Chlamydia psittaci), Chlamydia psittaci 02DC14	Predicted	1 out of 5	CAUTION: The sequence shown here is derived from an EMBL/GenBank/DDBJ whole genome shotgun (WGS) entry which is preliminary data. {ECO:0000313|EMBL:EPL02948.1}.		ATMU01000194;				2015-05-27	2018-09-12
A0A0E2J4H4	NZ_KE355836.1:667-837	96.43	28	1	0	86	3	1	28	6e-08	63.9	A0A0E2J4H4	A0A0E2J4H4_CHLPS	unreviewed	Putative nef attachable protein	CP02DC14_1553	Chlamydia psittaci 02DC14	38	unreviewed	1112253	cellular organisms, Bacteria, PVC group, Chlamydiae, Chlamydiia, Chlamydiales, Chlamydiaceae, Chlamydia/Chlamydophila group, Chlamydia, Chlamydophila psittaci (Chlamydia psittaci), Chlamydia psittaci 02DC14	Predicted	1 out of 5	CAUTION: The sequence shown here is derived from an EMBL/GenBank/DDBJ whole genome shotgun (WGS) entry which is preliminary data. {ECO:0000313|EMBL:EPL02953.1}.		ATMU01000193;				2015-05-27	2018-09-12
A0A0E2J4J4	NZ_KE360036.1:29-200	97.83	46	1	0	155	18	1	46	2e-12	79	A0A0E2J4J4	A0A0E2J4J4_CHLPS	unreviewed	Nef attachable domain protein	CP02DC14_1317	Chlamydia psittaci 02DC14	46	unreviewed	1112253	cellular organisms, Bacteria, PVC group, Chlamydiae, Chlamydiia, Chlamydiales, Chlamydiaceae, Chlamydia/Chlamydophila group, Chlamydia, Chlamydophila psittaci (Chlamydia psittaci), Chlamydia psittaci 02DC14	Predicted	1 out of 5	CAUTION: The sequence shown here is derived from an EMBL/GenBank/DDBJ whole genome shotgun (WGS) entry which is preliminary data. {ECO:0000313|EMBL:EPL03257.1}.		ATMU01000101;				2015-05-27	2018-09-12
A0A0E2J4M7	NZ_KE355539.1:73-223	100	39	0	0	134	18	1	39	1e-14	86.3	A0A0E2J4M7	A0A0E2J4M7_CHLPS	unreviewed	Nef attachable domain protein (Fragment)	CP02DC14_1253	Chlamydia psittaci 02DC14	39	unreviewed	1112253	cellular organisms, Bacteria, PVC group, Chlamydiae, Chlamydiia, Chlamydiales, Chlamydiaceae, Chlamydia/Chlamydophila group, Chlamydia, Chlamydophila psittaci (Chlamydia psittaci), Chlamydia psittaci 02DC14	Predicted	1 out of 5	CAUTION: The sequence shown here is derived from an EMBL/GenBank/DDBJ whole genome shotgun (WGS) entry which is preliminary data. {ECO:0000313|EMBL:EPL05227.1}.	Non-terminal residue (1)	ATMU01000072;				2015-05-27	2018-09-12
A0A0E2J4Z9	NZ_KE359949.1:253-424	97.83	46	1	0	18	155	1	46	9e-14	83.2	A0A0E2J4Z9	A0A0E2J4Z9_CHLPS	unreviewed	Nef attachable domain protein	CP02DC14_1207	Chlamydia psittaci 02DC14	46	unreviewed	1112253	cellular organisms, Bacteria, PVC group, Chlamydiae, Chlamydiia, Chlamydiales, Chlamydiaceae, Chlamydia/Chlamydophila group, Chlamydia, Chlamydophila psittaci (Chlamydia psittaci), Chlamydia psittaci 02DC14	Predicted	1 out of 5	CAUTION: The sequence shown here is derived from an EMBL/GenBank/DDBJ whole genome shotgun (WGS) entry which is preliminary data. {ECO:0000313|EMBL:EPL05579.1}.		ATMU01000049;				2015-05-27	2018-09-12
A0A0E2J519	NZ_KE353565.1:69-229	100	34	0	0	150	49	1	34	9e-12	76.6	A0A0E2J519	A0A0E2J519_CHLPS	unreviewed	Uncharacterized protein (Fragment)	CP02DC14_1166	Chlamydia psittaci 02DC14	34	unreviewed	1112253	cellular organisms, Bacteria, PVC group, Chlamydiae, Chlamydiia, Chlamydiales, Chlamydiaceae, Chlamydia/Chlamydophila group, Chlamydia, Chlamydophila psittaci (Chlamydia psittaci), Chlamydia psittaci 02DC14	Predicted	1 out of 5	CAUTION: The sequence shown here is derived from an EMBL/GenBank/DDBJ whole genome shotgun (WGS) entry which is preliminary data. {ECO:0000313|EMBL:EPL05700.1}.	Non-terminal residue (1)	ATMU01000025;				2015-05-27	2018-09-12
A0A0E2J8U0	NZ_KE353545.1:1063-1232	97.83	46	1	0	155	18	1	46	4e-11	74.3	A0A0E2J8U0	A0A0E2J8U0_CHLPS	unreviewed	Nef attachable domain protein	CP01DC11_1501	Chlamydia psittaci 01DC11	46	unreviewed	1112252	cellular organisms, Bacteria, PVC group, Chlamydiae, Chlamydiia, Chlamydiales, Chlamydiaceae, Chlamydia/Chlamydophila group, Chlamydia, Chlamydophila psittaci (Chlamydia psittaci), Chlamydia psittaci 01DC11	Predicted	1 out of 5	CAUTION: The sequence shown here is derived from an EMBL/GenBank/DDBJ whole genome shotgun (WGS) entry which is preliminary data. {ECO:0000313|EMBL:EPJ12884.1}.		ATKP01000350;				2015-05-27	2015-12-09
A0A0E2J8U6	NZ_KE353540.1:162-330	100	31	0	0	167	75	9	39	8e-08	63.5	A0A0E2J8U6	A0A0E2J8U6_CHLPS	unreviewed	Nef attachable domain protein (Fragment)	CP01DC11_1492	Chlamydia psittaci 01DC11	39	unreviewed	1112252	cellular organisms, Bacteria, PVC group, Chlamydiae, Chlamydiia, Chlamydiales, Chlamydiaceae, Chlamydia/Chlamydophila group, Chlamydia, Chlamydophila psittaci (Chlamydia psittaci), Chlamydia psittaci 01DC11	Predicted	1 out of 5	CAUTION: The sequence shown here is derived from an EMBL/GenBank/DDBJ whole genome shotgun (WGS) entry which is preliminary data. {ECO:0000313|EMBL:EPJ12960.1}.	Non-terminal residue (1)	ATKP01000345;				2015-05-27	2015-12-09
A0A0E2J8X9	NZ_FPLU01000003.1:1121-4095	100	37	0	0	2582	2692	1	37	1e-11	81.3	A0A0E2J8X9	A0A0E2J8X9_CHLPS	unreviewed	Uncharacterized protein (Fragment)	CP01DC11_1456	Chlamydia psittaci 01DC11	37	unreviewed	1112252	cellular organisms, Bacteria, PVC group, Chlamydiae, Chlamydiia, Chlamydiales, Chlamydiaceae, Chlamydia/Chlamydophila group, Chlamydia, Chlamydophila psittaci (Chlamydia psittaci), Chlamydia psittaci 01DC11	Predicted	1 out of 5	CAUTION: The sequence shown here is derived from an EMBL/GenBank/DDBJ whole genome shotgun (WGS) entry which is preliminary data. {ECO:0000313|EMBL:EPJ15098.1}.	Non-terminal residue (1)	ATKP01000317;				2015-05-27	2015-12-09
A0A0E2J903	NZ_KE353493.1:183-354	97.83	46	1	0	155	18	1	46	4e-19	100.9	A0A0E2J903	A0A0E2J903_CHLPS	unreviewed	Nef attachable domain protein	CP01DC11_1434	Chlamydia psittaci 01DC11	46	unreviewed	1112252	cellular organisms, Bacteria, PVC group, Chlamydiae, Chlamydiia, Chlamydiales, Chlamydiaceae, Chlamydia/Chlamydophila group, Chlamydia, Chlamydophila psittaci (Chlamydia psittaci), Chlamydia psittaci 01DC11	Predicted	1 out of 5	CAUTION: The sequence shown here is derived from an EMBL/GenBank/DDBJ whole genome shotgun (WGS) entry which is preliminary data. {ECO:0000313|EMBL:EPJ15178.1}.		ATKP01000297;				2015-05-27	2015-12-09
A0A0E2J979	NZ_FPLU01000003.1:1121-4095	100	53	0	0	1494	1652	1	53	3e-23	119.8	A0A0E2J979	A0A0E2J979_CHLPS	unreviewed	Uncharacterized protein	CP01DC11_1355	Chlamydia psittaci 01DC11	53	unreviewed	1112252	cellular organisms, Bacteria, PVC group, Chlamydiae, Chlamydiia, Chlamydiales, Chlamydiaceae, Chlamydia/Chlamydophila group, Chlamydia, Chlamydophila psittaci (Chlamydia psittaci), Chlamydia psittaci 01DC11	Predicted	1 out of 5	CAUTION: The sequence shown here is derived from an EMBL/GenBank/DDBJ whole genome shotgun (WGS) entry which is preliminary data. {ECO:0000313|EMBL:EPJ15290.1}.		ATKP01000242;				2015-05-27	2017-06-07
A0A0E2J9R9	NZ_FPLU01000003.1:1121-4095	100	39	0	0	675	559	1	39	2e-14	90.1	A0A0E2J9R9	A0A0E2J9R9_CHLPS	unreviewed	Uncharacterized protein (Fragment)	CP01DC11_1117	Chlamydia psittaci 01DC11	39	unreviewed	1112252	cellular organisms, Bacteria, PVC group, Chlamydiae, Chlamydiia, Chlamydiales, Chlamydiaceae, Chlamydia/Chlamydophila group, Chlamydia, Chlamydophila psittaci (Chlamydia psittaci), Chlamydia psittaci 01DC11	Predicted	1 out of 5	CAUTION: The sequence shown here is derived from an EMBL/GenBank/DDBJ whole genome shotgun (WGS) entry which is preliminary data. {ECO:0000313|EMBL:EPJ17892.1}.	Non-terminal residue (1)	ATKP01000039;				2015-05-27	2015-12-09
A0A0E2JFG7	NZ_KE355842.1:322-493	100	41	0	0	2	124	15	55	6e-16	90.5	A0A0E2JFG7	A0A0E2JFG7_CHLPS	unreviewed	Uncharacterized protein	CP02DC14_2378	Chlamydia psittaci 02DC14	55	unreviewed	1112253	cellular organisms, Bacteria, PVC group, Chlamydiae, Chlamydiia, Chlamydiales, Chlamydiaceae, Chlamydia/Chlamydophila group, Chlamydia, Chlamydophila psittaci (Chlamydia psittaci), Chlamydia psittaci 02DC14	Predicted	1 out of 5	CAUTION: The sequence shown here is derived from an EMBL/GenBank/DDBJ whole genome shotgun (WGS) entry which is preliminary data. {ECO:0000313|EMBL:EPL00632.1}.	Transmembrane (1)	ATMU01000488;				2015-05-27	2018-09-12
A0A0E2JFP2	NZ_KE355713.1:113-284	97.3	37	1	0	155	45	1	37	4e-12	77.8	A0A0E2JFP2	A0A0E2JFP2_CHLPS	unreviewed	Nef attachable domain protein	CP02DC14_2236	Chlamydia psittaci 02DC14	37	unreviewed	1112253	cellular organisms, Bacteria, PVC group, Chlamydiae, Chlamydiia, Chlamydiales, Chlamydiaceae, Chlamydia/Chlamydophila group, Chlamydia, Chlamydophila psittaci (Chlamydia psittaci), Chlamydia psittaci 02DC14	Predicted	1 out of 5	CAUTION: The sequence shown here is derived from an EMBL/GenBank/DDBJ whole genome shotgun (WGS) entry which is preliminary data. {ECO:0000313|EMBL:EPL01689.1}.		ATMU01000438;				2015-05-27	2018-09-12
A0A0E2JFP6	NZ_KE355704.1:948-1119	97.44	39	1	0	155	39	1	39	4e-15	87.8	A0A0E2JFP6	A0A0E2JFP6_CHLPS	unreviewed	Nef attachable domain protein (Fragment)	CP02DC14_2234A	Chlamydia psittaci 02DC14	39	unreviewed	1112253	cellular organisms, Bacteria, PVC group, Chlamydiae, Chlamydiia, Chlamydiales, Chlamydiaceae, Chlamydia/Chlamydophila group, Chlamydia, Chlamydophila psittaci (Chlamydia psittaci), Chlamydia psittaci 02DC14	Predicted	1 out of 5	CAUTION: The sequence shown here is derived from an EMBL/GenBank/DDBJ whole genome shotgun (WGS) entry which is preliminary data. {ECO:0000313|EMBL:EPL01699.1}.	Non-terminal residue (1)	ATMU01000436;				2015-05-27	2018-09-12
A0A0E2JFQ8	NZ_KE356006.1:119-290	97.83	46	1	0	155	18	1	46	3e-08	64.7	A0A0E2JFQ8	A0A0E2JFQ8_CHLPS	unreviewed	Nef attachable domain protein	CP02DC14_2216	Chlamydia psittaci 02DC14	46	unreviewed	1112253	cellular organisms, Bacteria, PVC group, Chlamydiae, Chlamydiia, Chlamydiales, Chlamydiaceae, Chlamydia/Chlamydophila group, Chlamydia, Chlamydophila psittaci (Chlamydia psittaci), Chlamydia psittaci 02DC14	Predicted	1 out of 5	CAUTION: The sequence shown here is derived from an EMBL/GenBank/DDBJ whole genome shotgun (WGS) entry which is preliminary data. {ECO:0000313|EMBL:EPL01731.1}.		ATMU01000428;				2015-05-27	2018-09-12
A0A0E2JG34	NZ_KE355625.1:196-366	100	36	0	0	170	63	6	41	3e-13	81.6	A0A0E2JG34	A0A0E2JG34_CHLPS	unreviewed	Nef attachable domain protein (Fragment)	CP02DC14_1989	Chlamydia psittaci 02DC14	41	unreviewed	1112253	cellular organisms, Bacteria, PVC group, Chlamydiae, Chlamydiia, Chlamydiales, Chlamydiaceae, Chlamydia/Chlamydophila group, Chlamydia, Chlamydophila psittaci (Chlamydia psittaci), Chlamydia psittaci 02DC14	Predicted	1 out of 5	CAUTION: The sequence shown here is derived from an EMBL/GenBank/DDBJ whole genome shotgun (WGS) entry which is preliminary data. {ECO:0000313|EMBL:EPL02259.1}.	Non-terminal residue (1)	ATMU01000340;				2015-05-27	2018-09-12
A0A0E2JG53	NZ_KE355892.1:25-196	97.83	46	1	0	18	155	1	46	3e-19	101.3	A0A0E2JG53	A0A0E2JG53_CHLPS	unreviewed	Nef attachable domain protein	CP02DC14_1923	Chlamydia psittaci 02DC14	46	unreviewed	1112253	cellular organisms, Bacteria, PVC group, Chlamydiae, Chlamydiia, Chlamydiales, Chlamydiaceae, Chlamydia/Chlamydophila group, Chlamydia, Chlamydophila psittaci (Chlamydia psittaci), Chlamydia psittaci 02DC14	Predicted	1 out of 5	CAUTION: The sequence shown here is derived from an EMBL/GenBank/DDBJ whole genome shotgun (WGS) entry which is preliminary data. {ECO:0000313|EMBL:EPL02327.1}.		ATMU01000321;				2015-05-27	2018-09-12
A0A0E2JG70	NZ_KE355451.1:63-232	97.83	46	1	0	16	153	1	46	7e-19	100.1	A0A0E2JG70	A0A0E2JG70_CHLPS	unreviewed	Nef attachable domain protein	CP02DC14_1886	Chlamydia psittaci 02DC14	46	unreviewed	1112253	cellular organisms, Bacteria, PVC group, Chlamydiae, Chlamydiia, Chlamydiales, Chlamydiaceae, Chlamydia/Chlamydophila group, Chlamydia, Chlamydophila psittaci (Chlamydia psittaci), Chlamydia psittaci 02DC14	Predicted	1 out of 5	CAUTION: The sequence shown here is derived from an EMBL/GenBank/DDBJ whole genome shotgun (WGS) entry which is preliminary data. {ECO:0000313|EMBL:EPL02389.1}.		ATMU01000310;				2015-05-27	2018-09-12
A0A0E2JG83	NZ_KE355586.1:273-443	97.5	40	1	0	160	41	2	41	4e-12	77.8	A0A0E2JG83	A0A0E2JG83_CHLPS	unreviewed	Uncharacterized protein (Fragment)	CP02DC14_1851	Chlamydia psittaci 02DC14	41	unreviewed	1112253	cellular organisms, Bacteria, PVC group, Chlamydiae, Chlamydiia, Chlamydiales, Chlamydiaceae, Chlamydia/Chlamydophila group, Chlamydia, Chlamydophila psittaci (Chlamydia psittaci), Chlamydia psittaci 02DC14	Predicted	1 out of 5	CAUTION: The sequence shown here is derived from an EMBL/GenBank/DDBJ whole genome shotgun (WGS) entry which is preliminary data. {ECO:0000313|EMBL:EPL02446.1}.	Non-terminal residue (1)	ATMU01000297;				2015-05-27	2018-09-12
A0A0E2JGB9	NZ_KE353596.1:49-218	100	31	0	0	169	77	5	35	4e-09	67.8	A0A0E2JGB9	A0A0E2JGB9_CHLPS	unreviewed	Uncharacterized protein (Fragment)	CP02DC14_1741	Chlamydia psittaci 02DC14	35	unreviewed	1112253	cellular organisms, Bacteria, PVC group, Chlamydiae, Chlamydiia, Chlamydiales, Chlamydiaceae, Chlamydia/Chlamydophila group, Chlamydia, Chlamydophila psittaci (Chlamydia psittaci), Chlamydia psittaci 02DC14	Predicted	1 out of 5	CAUTION: The sequence shown here is derived from an EMBL/GenBank/DDBJ whole genome shotgun (WGS) entry which is preliminary data. {ECO:0000313|EMBL:EPL02696.1}.	Non-terminal residue (1)	ATMU01000258;				2015-05-27	2018-09-12
A0A0E2JGG5	NZ_KE355705.1:216-384	97.83	46	1	0	154	17	1	46	1e-17	96.3	A0A0E2JGG5	A0A0E2JGG5_CHLPS	unreviewed	Nef attachable domain protein	CP02DC14_1645	Chlamydia psittaci 02DC14	46	unreviewed	1112253	cellular organisms, Bacteria, PVC group, Chlamydiae, Chlamydiia, Chlamydiales, Chlamydiaceae, Chlamydia/Chlamydophila group, Chlamydia, Chlamydophila psittaci (Chlamydia psittaci), Chlamydia psittaci 02DC14	Predicted	1 out of 5	CAUTION: The sequence shown here is derived from an EMBL/GenBank/DDBJ whole genome shotgun (WGS) entry which is preliminary data. {ECO:0000313|EMBL:EPL02788.1}.		ATMU01000221;				2015-05-27	2018-09-12
A0A0E2JGH6	NZ_KE359939.1:144-315	100	41	0	0	171	49	15	55	1e-17	95.9	A0A0E2JGH6	A0A0E2JGH6_CHLPS	unreviewed	Uncharacterized protein	CP02DC14_1617	Chlamydia psittaci 02DC14	55	unreviewed	1112253	cellular organisms, Bacteria, PVC group, Chlamydiae, Chlamydiia, Chlamydiales, Chlamydiaceae, Chlamydia/Chlamydophila group, Chlamydia, Chlamydophila psittaci (Chlamydia psittaci), Chlamydia psittaci 02DC14	Predicted	1 out of 5	CAUTION: The sequence shown here is derived from an EMBL/GenBank/DDBJ whole genome shotgun (WGS) entry which is preliminary data. {ECO:0000313|EMBL:EPL02829.1}.		ATMU01000213;				2015-05-27	2018-09-12
A0A0E2LT58	NZ_CIEA01000127.1:104-276	96.23	53	2	0	5	163	1	53	8e-24	116.7	A0A0E2LT58	A0A0E2LT58_PORGN	unreviewed	Uncharacterized protein	HMPREF1555_00131	Porphyromonas gingivalis F0570	54	unreviewed	1227271	cellular organisms, Bacteria, FCB group, Bacteroidetes/Chlorobi group, Bacteroidetes, Bacteroidia, Bacteroidales, Porphyromonadaceae, Porphyromonas, Porphyromonas gingivalis, Porphyromonas gingivalis F0570	Predicted	1 out of 5	CAUTION: The sequence shown here is derived from an EMBL/GenBank/DDBJ whole genome shotgun (WGS) entry which is preliminary data. {ECO:0000313|EMBL:ERJ68951.1}.		AWUW01000008;				2015-05-27	2017-06-07
A0A0E2LTA1	NZ_CMHG01000050.1:5-174	100	53	0	0	10	168	1	53	8e-24	116.7	A0A0E2LTA1	A0A0E2LTA1_PORGN	unreviewed	Uncharacterized protein	HMPREF1555_00132	Porphyromonas gingivalis F0570	56	unreviewed	1227271	cellular organisms, Bacteria, FCB group, Bacteroidetes/Chlorobi group, Bacteroidetes, Bacteroidia, Bacteroidales, Porphyromonadaceae, Porphyromonas, Porphyromonas gingivalis, Porphyromonas gingivalis F0570	Predicted	1 out of 5	CAUTION: The sequence shown here is derived from an EMBL/GenBank/DDBJ whole genome shotgun (WGS) entry which is preliminary data. {ECO:0000313|EMBL:ERJ68952.1}.		AWUW01000008;				2015-05-27	2017-06-07
A0A0E2LTX7	NZ_KI259179.1:668-816	100	45	0	0	1	135	6	50	2e-18	98.6	A0A0E2LTX7	A0A0E2LTX7_PORGN	unreviewed	Uncharacterized protein	HMPREF1555_00133	Porphyromonas gingivalis F0570	50	unreviewed	1227271	cellular organisms, Bacteria, FCB group, Bacteroidetes/Chlorobi group, Bacteroidetes, Bacteroidia, Bacteroidales, Porphyromonadaceae, Porphyromonas, Porphyromonas gingivalis, Porphyromonas gingivalis F0570	Predicted	1 out of 5	CAUTION: The sequence shown here is derived from an EMBL/GenBank/DDBJ whole genome shotgun (WGS) entry which is preliminary data. {ECO:0000313|EMBL:ERJ68953.1}.		AWUW01000008;				2015-05-27	2017-06-07
A0A0E2M890	NZ_MUNL01000072.1:121-294	100	55	0	0	9	173	1	55	2e-24	118.6	A0A0E2M890	A0A0E2M890_PORGN	unreviewed	Uncharacterized protein	HMPREF1555_00130	Porphyromonas gingivalis F0570	58	unreviewed	1227271	cellular organisms, Bacteria, FCB group, Bacteroidetes/Chlorobi group, Bacteroidetes, Bacteroidia, Bacteroidales, Porphyromonadaceae, Porphyromonas, Porphyromonas gingivalis, Porphyromonas gingivalis F0570	Predicted	1 out of 5	CAUTION: The sequence shown here is derived from an EMBL/GenBank/DDBJ whole genome shotgun (WGS) entry which is preliminary data. {ECO:0000313|EMBL:ERJ68950.1}.		AWUW01000008;				2015-05-27	2015-12-09
A0A0E9CRI3	NZ_FPMP01000193.1:1-228	100	32	0	0	3	98	84	115	3e-10	71.6	A0A0E9CRI3	A0A0E9CRI3_CHLTH	unreviewed	Uncharacterized protein	ERS075195_00758	Chlamydia trachomatis	115	unreviewed	813	cellular organisms, Bacteria, PVC group, Chlamydiae, Chlamydiia, Chlamydiales, Chlamydiaceae, Chlamydia/Chlamydophila group, Chlamydia, Chlamydia trachomatis	Predicted	1 out of 5			CVNO01000533;				2015-06-24	2017-08-30
A0A0E9CRP0	NZ_CVNL01000009.1:440-1248	96.92	65	2	0	501	307	1	65	4e-14	86.7	A0A0E9CRP0	A0A0E9CRP0_CHLTH	unreviewed	Uncharacterized protein	ERS075195_00783	Chlamydia trachomatis	65	unreviewed	813	cellular organisms, Bacteria, PVC group, Chlamydiae, Chlamydiia, Chlamydiales, Chlamydiaceae, Chlamydia/Chlamydophila group, Chlamydia, Chlamydia trachomatis	Predicted	1 out of 5		Transmembrane (1)	CVNO01000596;				2015-06-24	2017-08-30
A0A0E9CT77	NZ_FPML01000077.1:5-275	97.5	40	1	0	2	121	12	51	3e-13	81.6	A0A0E9CT77	A0A0E9CT77_CHLTH	unreviewed	Uncharacterized protein	ERS075195_00829	Chlamydia trachomatis	61	unreviewed	813	cellular organisms, Bacteria, PVC group, Chlamydiae, Chlamydiia, Chlamydiales, Chlamydiaceae, Chlamydia/Chlamydophila group, Chlamydia, Chlamydia trachomatis	Predicted	1 out of 5			CVNO01000715;				2015-06-24	2017-08-30
A0A0E9CTA2	NZ_FPIK01000160.1:1-305	100	50	0	0	31	180	1	50	2e-20	105.5	A0A0E9CTA2	A0A0E9CTA2_CHLTH	unreviewed	Uncharacterized protein	ERS075195_00840	Chlamydia trachomatis	51	unreviewed	813	cellular organisms, Bacteria, PVC group, Chlamydiae, Chlamydiia, Chlamydiales, Chlamydiaceae, Chlamydia/Chlamydophila group, Chlamydia, Chlamydia trachomatis	Predicted	1 out of 5			CVNO01000765;				2015-06-24	2017-08-30
A0A0E9CTG5	NZ_CVNJ01000005.1:2760-3985	100	37	0	0	463	573	1	37	7e-10	73.6	A0A0E9CTG5	A0A0E9CTG5_CHLTH	unreviewed	Uncharacterized protein	ERS075195_00900	Chlamydia trachomatis	37	unreviewed	813	cellular organisms, Bacteria, PVC group, Chlamydiae, Chlamydiia, Chlamydiales, Chlamydiaceae, Chlamydia/Chlamydophila group, Chlamydia, Chlamydia trachomatis	Predicted	1 out of 5			CVNO01001117;				2015-06-24	2017-08-30
A0A0E9CTL1	NZ_FPMP01000047.1:382-1044	98.91	92	1	0	506	231	1	92	5e-46	191.8	A0A0E9CTL1	A0A0E9CTL1_CHLTH	unreviewed	Uncharacterized protein	ERS075195_00711	Chlamydia trachomatis	92	unreviewed	813	cellular organisms, Bacteria, PVC group, Chlamydiae, Chlamydiia, Chlamydiales, Chlamydiaceae, Chlamydia/Chlamydophila group, Chlamydia, Chlamydia trachomatis	Predicted	1 out of 5			CVNO01000441;				2015-06-24	2017-08-30
A0A0E9CWB3	NZ_FPMP01000193.1:1-228	100	36	0	0	110	217	1	36	7e-10	70.5	A0A0E9CWB3	A0A0E9CWB3_CHLTH	unreviewed	Uncharacterized protein	ERS075195_00757	Chlamydia trachomatis	36	unreviewed	813	cellular organisms, Bacteria, PVC group, Chlamydiae, Chlamydiia, Chlamydiales, Chlamydiaceae, Chlamydia/Chlamydophila group, Chlamydia, Chlamydia trachomatis	Predicted	1 out of 5		Transmembrane (1)	CVNO01000533;				2015-06-24	2017-08-30
A0A0E9CWD8	NZ_FPMP01000125.1:1-269	96.23	53	2	0	159	1	1	53	1e-18	99.8	A0A0E9CWD8	A0A0E9CWD8_CHLTH	unreviewed	Uncharacterized protein	ERS075195_00767	Chlamydia trachomatis	54	unreviewed	813	cellular organisms, Bacteria, PVC group, Chlamydiae, Chlamydiia, Chlamydiales, Chlamydiaceae, Chlamydia/Chlamydophila group, Chlamydia, Chlamydia trachomatis	Predicted	1 out of 5		Transmembrane (1)	CVNO01000564;				2015-06-24	2017-08-30
A0A0E9DBI1	NZ_FPIK01000009.1:93-776	97.47	79	2	0	683	447	130	208	7e-34	151.8	A0A0E9DBI1	A0A0E9DBI1_CHLTH	unreviewed	L1 transposable element	ERS082928_02168	Chlamydia trachomatis	217	unreviewed	813	cellular organisms, Bacteria, PVC group, Chlamydiae, Chlamydiia, Chlamydiales, Chlamydiaceae, Chlamydia/Chlamydophila group, Chlamydia, Chlamydia trachomatis	Predicted	1 out of 5		Coiled coil (3); Domain (1)	CVNU01000037;				2015-06-24	2017-12-20
A0A0E9DBJ4	NZ_FPIJ01000009.1:5782-6591	97.81	183	4	0	48	596	1	183	4e-98	365.5	A0A0E9DBJ4	A0A0E9DBJ4_CHLTH	unreviewed	L1 transposable element	ERS082928_02183	Chlamydia trachomatis	183	unreviewed	813	cellular organisms, Bacteria, PVC group, Chlamydiae, Chlamydiia, Chlamydiales, Chlamydiaceae, Chlamydia/Chlamydophila group, Chlamydia, Chlamydia trachomatis	Predicted	1 out of 5		Domain (1)	CVNU01000040;				2015-06-24	2018-09-12
A0A0E9DBL9	NZ_FPIL01000018.1:1061-1512	100	28	0	0	452	369	64	91	5e-08	64.7	A0A0E9DBL9	A0A0E9DBL9_CHLTH	unreviewed	Uncharacterized protein	ERS082928_02208	Chlamydia trachomatis	91	unreviewed	813	cellular organisms, Bacteria, PVC group, Chlamydiae, Chlamydiia, Chlamydiales, Chlamydiaceae, Chlamydia/Chlamydophila group, Chlamydia, Chlamydia trachomatis	Predicted	1 out of 5		Transmembrane (1)	CVNU01000054;				2015-06-24	2017-08-30
A0A0E9DC65	NZ_FPIJ01000009.1:1501-2185	96.92	195	6	0	3	587	27	221	1e-101	377.1	A0A0E9DC65	A0A0E9DC65_CHLTH	unreviewed	L1 transposable element	ERS082928_02169	Chlamydia trachomatis	247	unreviewed	813	cellular organisms, Bacteria, PVC group, Chlamydiae, Chlamydiia, Chlamydiales, Chlamydiaceae, Chlamydia/Chlamydophila group, Chlamydia, Chlamydia trachomatis	Predicted	1 out of 5		Coiled coil (1); Domain (2)	CVNU01000037;				2015-06-24	2018-09-12
A0A0E9DC80	NZ_FPIK01000009.1:93-776	97.71	218	4	1	653	3	115	332	6e-115	421	A0A0E9DC80	A0A0E9DC80_CHLTH	unreviewed	Exonuclease III	ERS082928_02184	Chlamydia trachomatis	347	unreviewed	813	cellular organisms, Bacteria, PVC group, Chlamydiae, Chlamydiia, Chlamydiales, Chlamydiaceae, Chlamydia/Chlamydophila group, Chlamydia, Chlamydia trachomatis	Predicted	1 out of 5		Coiled coil (2); Domain (3)	CVNU01000040;				2015-06-24	2018-09-12
A0A0E9DCH4	NZ_FQLM01000003.1:4122-5041	95.76	236	10	0	918	211	136	371	6e-124	451.8	A0A0E9DCH4	A0A0E9DCH4_CHLTH	unreviewed	L1 transposable element	ERS082928_02166	Chlamydia trachomatis	371	unreviewed	813	cellular organisms, Bacteria, PVC group, Chlamydiae, Chlamydiia, Chlamydiales, Chlamydiaceae, Chlamydia/Chlamydophila group, Chlamydia, Chlamydia trachomatis	Predicted	1 out of 5		Coiled coil (4); Domain (2)	CVNU01000037;				2015-06-24	2018-09-12
A0A0E9DCJ6	NZ_FPIK01000012.1:623-1223	100	199	0	0	3	599	122	320	5e-108	397.5	A0A0E9DCJ6	A0A0E9DCJ6_CHLTH	unreviewed	L1 transposable element	ERS082928_02191	Chlamydia trachomatis	331	unreviewed	813	cellular organisms, Bacteria, PVC group, Chlamydiae, Chlamydiia, Chlamydiales, Chlamydiaceae, Chlamydia/Chlamydophila group, Chlamydia, Chlamydia trachomatis	Predicted	1 out of 5		Coiled coil (2); Domain (2)	CVNU01000042;				2015-06-24	2018-09-12
A0A0E9DDG2	NZ_FPIK01000009.1:93-776	97.37	76	2	0	683	456	130	205	6e-33	148.7	A0A0E9DDG2	A0A0E9DDG2_CHLTH	unreviewed	L1 transposable element	ERS082928_02165	Chlamydia trachomatis	214	unreviewed	813	cellular organisms, Bacteria, PVC group, Chlamydiae, Chlamydiia, Chlamydiales, Chlamydiaceae, Chlamydia/Chlamydophila group, Chlamydia, Chlamydia trachomatis	Predicted	1 out of 5		Coiled coil (3); Domain (1)	CVNU01000037;				2015-06-24	2017-12-20
A0A0E9DDG8	NZ_FPIK01000009.1:93-776	96.48	227	8	0	683	3	130	356	7e-121	440.7	A0A0E9DDG8	A0A0E9DDG8_CHLTH	unreviewed	L1 transposable element	ERS082928_02170	Chlamydia trachomatis	371	unreviewed	813	cellular organisms, Bacteria, PVC group, Chlamydiae, Chlamydiia, Chlamydiales, Chlamydiaceae, Chlamydia/Chlamydophila group, Chlamydia, Chlamydia trachomatis	Predicted	1 out of 5		Coiled coil (3); Domain (2)	CVNU01000037;				2015-06-24	2018-09-12
A0A0E9DDI2	NZ_FPIH01000010.1:6347-7681	99.52	210	1	0	2	631	9	218	4e-118	433.3	A0A0E9DDI2	A0A0E9DDI2_CHLTH	unreviewed	Exonuclease III	ERS082928_02185	Chlamydia trachomatis	233	unreviewed	813	cellular organisms, Bacteria, PVC group, Chlamydiae, Chlamydiia, Chlamydiales, Chlamydiaceae, Chlamydia/Chlamydophila group, Chlamydia, Chlamydia trachomatis	Predicted	1 out of 5		Domain (1)	CVNU01000040;				2015-06-24	2017-10-25
A0A0E9DFV3	NZ_CVNJ01000005.1:5066-6572	100	183	0	0	1506	958	9	191	1e-100	375.6	A0A0E9DFV3	A0A0E9DFV3_CHLTH	unreviewed	Exonuclease III	ERS082928_02167	Chlamydia trachomatis	204	unreviewed	813	cellular organisms, Bacteria, PVC group, Chlamydiae, Chlamydiia, Chlamydiales, Chlamydiaceae, Chlamydia/Chlamydophila group, Chlamydia, Chlamydia trachomatis	Predicted	1 out of 5		Domain (1)	CVNU01000037;				2015-06-24	2017-10-25
A0A0E9DG03	NZ_CVNX01000019.1:293-1156	100	170	0	0	264	773	1	170	2e-91	344	A0A0E9DG03	A0A0E9DG03_CHLTH	unreviewed	Retron-type reverse transcriptase	ERS082928_02217	Chlamydia trachomatis	199	unreviewed	813	cellular organisms, Bacteria, PVC group, Chlamydiae, Chlamydiia, Chlamydiales, Chlamydiaceae, Chlamydia/Chlamydophila group, Chlamydia, Chlamydia trachomatis	Predicted	1 out of 5			CVNU01000066;				2015-06-24	2017-11-22
A0A0E9EJB0	NZ_CVNI01000002.1:672-1352	100	130	0	0	392	3	1	130	4e-68	265.4	A0A0E9EJB0	A0A0E9EJB0_CHLTH	unreviewed	Protein of uncharacterized function (DUF3704)	ERS133246_05568	Chlamydia trachomatis	137	unreviewed	813	cellular organisms, Bacteria, PVC group, Chlamydiae, Chlamydiia, Chlamydiales, Chlamydiaceae, Chlamydia/Chlamydophila group, Chlamydia, Chlamydia trachomatis	Predicted	1 out of 5			CVOA01001239;				2015-06-24	2018-02-28
A0A0E9FFS4	NZ_LVEB01000111.1:393-560	100	39	0	0	118	2	1	39	2e-15	89	A0A0E9FFS4	A0A0E9FFS4_CHLTH	unreviewed	Uncharacterized protein	ERS095036_14731	Chlamydia trachomatis	95	unreviewed	813	cellular organisms, Bacteria, PVC group, Chlamydiae, Chlamydiia, Chlamydiales, Chlamydiaceae, Chlamydia/Chlamydophila group, Chlamydia, Chlamydia trachomatis	Predicted	1 out of 5			CVNZ01005538;				2015-06-24	2017-08-30
A0A0E9FFV0	NZ_PJAI01000113.1:102-277	100	34	0	0	75	176	1	34	2e-12	78.6	A0A0E9FFV0	A0A0E9FFV0_CHLTH	unreviewed	Uncharacterized protein	ERS095036_14732	Chlamydia trachomatis	65	unreviewed	813	cellular organisms, Bacteria, PVC group, Chlamydiae, Chlamydiia, Chlamydiales, Chlamydiaceae, Chlamydia/Chlamydophila group, Chlamydia, Chlamydia trachomatis	Predicted	1 out of 5			CVNZ01005538;				2015-06-24	2017-08-30
A0A0E9FJ85	NZ_CIEA01000144.1:413-577	100	31	0	0	16	108	1	31	3e-08	65.1	A0A0E9FJ85	A0A0E9FJ85_CHLTH	unreviewed	Uncharacterized protein	ERS095036_14730	Chlamydia trachomatis	31	unreviewed	813	cellular organisms, Bacteria, PVC group, Chlamydiae, Chlamydiia, Chlamydiales, Chlamydiaceae, Chlamydia/Chlamydophila group, Chlamydia, Chlamydia trachomatis	Predicted	1 out of 5			CVNZ01005538;				2015-06-24	2017-08-30
A0A0E9FK67	NZ_LCSI01000029.1:552-738	100	39	0	0	5	121	1	39	4e-18	97.8	A0A0E9FK67	A0A0E9FK67_CHLTH	unreviewed	Uncharacterized protein	ERS095036_16398	Chlamydia trachomatis	39	unreviewed	813	cellular organisms, Bacteria, PVC group, Chlamydiae, Chlamydiia, Chlamydiales, Chlamydiaceae, Chlamydia/Chlamydophila group, Chlamydia, Chlamydia trachomatis	Predicted	1 out of 5			CVNZ01009449;				2015-06-24	2017-08-30
A0A0E9FL68	NZ_NRUT01000115.1:1464-1676	100	54	0	0	50	211	1	54	8e-27	126.7	A0A0E9FL68	A0A0E9FL68_CHLTH	unreviewed	Uncharacterized protein	ERS095036_16774	Chlamydia trachomatis	62	unreviewed	813	cellular organisms, Bacteria, PVC group, Chlamydiae, Chlamydiia, Chlamydiales, Chlamydiaceae, Chlamydia/Chlamydophila group, Chlamydia, Chlamydia trachomatis	Predicted	1 out of 5			CVNZ01011575;				2015-06-24	2017-08-30
A0A0E9FLV2	NZ_JHDV01000053.1:215-394	100	40	0	0	59	178	1	40	4e-18	97.8	A0A0E9FLV2	A0A0E9FLV2_CHLTH	unreviewed	Uncharacterized protein	ERS095036_16399	Chlamydia trachomatis	42	unreviewed	813	cellular organisms, Bacteria, PVC group, Chlamydiae, Chlamydiia, Chlamydiales, Chlamydiaceae, Chlamydia/Chlamydophila group, Chlamydia, Chlamydia trachomatis	Predicted	1 out of 5			CVNZ01009449;				2015-06-24	2017-08-30
A0A0F9BJX7	NZ_PWDA01000087.1:74-1418	97.22	395	11	0	61	1245	20	414	1e-220	774.2	A0A0F9BJX7	A0A0F9BJX7_9ZZZZ	unreviewed	Uncharacterized protein (Fragment)	LCGC14_2780580	marine sediment metagenome	414	unreviewed	412755	unclassified sequences, metagenomes, ecological metagenomes, marine sediment metagenome	Predicted	1 out of 5	CAUTION: The sequence shown here is derived from an EMBL/GenBank/DDBJ whole genome shotgun (WGS) entry which is preliminary data. {ECO:0000313|EMBL:KKK84711.1}.	Coiled coil (1); Domain (1); Non-terminal residue (2)	LAZR01051648;				2015-07-22	2017-10-25
A0A0I9S9E7	NZ_JMZZ02000129.1:133-349	100	63	0	0	191	3	20	82	8e-17	93.6	A0A0I9S9E7	A0A0I9S9E7_BACFG	unreviewed	Uncharacterized protein	EE52_0211425	Bacteroides fragilis	112	unreviewed	817	cellular organisms, Bacteria, FCB group, Bacteroidetes/Chlorobi group, Bacteroidetes, Bacteroidia, Bacteroidales, Bacteroidaceae, Bacteroides, Bacteroides fragilis	Predicted	1 out of 5	CAUTION: The sequence shown here is derived from an EMBL/GenBank/DDBJ whole genome shotgun (WGS) entry which is preliminary data. {ECO:0000313|EMBL:KFX74605.1}.	Transmembrane (1)	JMZZ02000129;	WP_044300422.1;			2015-10-14	2017-06-07
A0A0J7KN06	NZ_FRWQ01000309.1:321-1385	98.2	334	6	0	1	1002	1	334	1e-189	670.2	A0A0J7KN06	A0A0J7KN06_LASNI	unreviewed	I38588 reverse transcriptase-like protein	RF55_8499	Lasius niger (Black garden ant)	346	unreviewed	67767	cellular organisms, Eukaryota, Opisthokonta, Metazoa, Eumetazoa, Bilateria, Protostomia, Ecdysozoa, Panarthropoda, Arthropoda, Mandibulata, Pancrustacea, Hexapoda, Insecta, Dicondylia, Pterygota (winged insects), Neoptera, Holometabola, Hymenoptera, Apocrita (wasps, ants and bees), Aculeata, Formicoidea, Formicidae, Formicinae, Lasiini, Lasius, Lasius, Lasius niger (Black garden ant)	Predicted	1 out of 5	CAUTION: The sequence shown here is derived from an EMBL/GenBank/DDBJ whole genome shotgun (WGS) entry which is preliminary data. {ECO:0000313|EMBL:KMQ91611.1}.	Coiled coil (1); Domain (1)	LBMM01005319;				2015-10-14	2018-05-23
A0A0J7MNV3	NZ_AIOD01000141.1:1-543	99.34	152	1	0	521	66	159	310	5e-79	300.8	A0A0J7MNV3	A0A0J7MNV3_LASNI	unreviewed	Rna-directed dna (Fragment)	RF55_23542	Lasius niger (Black garden ant)	310	unreviewed	67767	cellular organisms, Eukaryota, Opisthokonta, Metazoa, Eumetazoa, Bilateria, Protostomia, Ecdysozoa, Panarthropoda, Arthropoda, Mandibulata, Pancrustacea, Hexapoda, Insecta, Dicondylia, Pterygota (winged insects), Neoptera, Holometabola, Hymenoptera, Apocrita (wasps, ants and bees), Aculeata, Formicoidea, Formicidae, Formicinae, Lasiini, Lasius, Lasius, Lasius niger (Black garden ant)	Predicted	1 out of 5	CAUTION: The sequence shown here is derived from an EMBL/GenBank/DDBJ whole genome shotgun (WGS) entry which is preliminary data. {ECO:0000313|EMBL:KMQ82280.1}.	Domain (1); Non-terminal residue (2)	LBMM01026782;				2015-10-14	2018-05-23
A0A0K2VLS1	NZ_BBKD01000412.1:197-971	98.21	56	1	0	608	441	1	56	3e-28	133.7	A0A0K2VLS1	A0A0K2VLS1_LEPSM	unreviewed	Uncharacterized protein (Fragment)		Lepeophtheirus salmonis (Salmon louse)	56	unreviewed	72036	cellular organisms, Eukaryota, Opisthokonta, Metazoa, Eumetazoa, Bilateria, Protostomia, Ecdysozoa, Panarthropoda, Arthropoda, Mandibulata, Pancrustacea, Crustacea, Multicrustacea, Hexanauplia, Copepoda (copepods), Neocopepoda, Podoplea, Siphonostomatoida, Caligidae, Lepeophtheirus, Lepeophtheirus salmonis (Salmon louse)	Predicted	1 out of 5		Non-terminal residue (1)	HACA01033890;				2015-11-11	2018-06-20
A0A0L7KM61	NZ_JPWZ01000243.1:1-546	96.36	165	6	0	51	545	1	165	6e-85	320.5	A0A0L7KM61	A0A0L7KM61_PLAFX	unreviewed	Uncharacterized protein (Fragment)	PFHG_05430	Plasmodium falciparum (isolate HB3)	223	unreviewed	137071	cellular organisms, Eukaryota, Alveolata, Apicomplexa, Aconoidasida, Haemosporida (haemosporidians), Plasmodiidae, Plasmodium, Plasmodium (Laverania), Plasmodium falciparum, Plasmodium falciparum (isolate HB3)	Predicted	1 out of 5		Coiled coil (1); Non-terminal residue (1)	GG700914;				2015-11-11	2018-06-20
A0A0M3DFF5	NZ_LBBT01000193.1:1-280	100	93	0	0	279	1	1	93	1e-45	189.5	A0A0M3DFF5	A0A0M3DFF5_9FIRM	unreviewed	Uncharacterized protein (Fragment)	VN21_09090	Paraclostridium benzoelyticum	93	unreviewed	1629550	cellular organisms, Bacteria, Terrabacteria group, Firmicutes, Clostridia, Clostridiales, Peptostreptococcaceae, Paraclostridium, Paraclostridium benzoelyticum	Predicted	1 out of 5	CAUTION: The sequence shown here is derived from an EMBL/GenBank/DDBJ whole genome shotgun (WGS) entry which is preliminary data. {ECO:0000313|EMBL:KKY01375.1}.	Non-terminal residue (2)	LBBT01000193;				2015-11-11	2017-09-27
A0A0P5WRU9	NZ_AMRJ01000061.1:542-2984	98.81	670	8	0	2010	1	1	670	0	1341.3	A0A0P5WRU9	A0A0P5WRU9_9CRUS	unreviewed	Reverse transcriptase		Daphnia magna	864	unreviewed	35525	cellular organisms, Eukaryota, Opisthokonta, Metazoa, Eumetazoa, Bilateria, Protostomia, Ecdysozoa, Panarthropoda, Arthropoda, Mandibulata, Pancrustacea, Crustacea, Branchiopoda, Phyllopoda, Diplostraca, Cladocera (water fleas), Anomopoda, Daphniidae, Daphnia (common water fleas), Daphnia magna	Predicted	1 out of 5		Domain (1)	GDIP01082524;				2016-01-20	2017-11-22
A0A0P5WXS4	NZ_LZSE01000010.1:1742-5035	98.93	563	6	0	1606	3294	1	563	0	1134	A0A0P5WXS4	A0A0P5WXS4_9CRUS	unreviewed	Reverse transcriptase		Daphnia magna	768	unreviewed	35525	cellular organisms, Eukaryota, Opisthokonta, Metazoa, Eumetazoa, Bilateria, Protostomia, Ecdysozoa, Panarthropoda, Arthropoda, Mandibulata, Pancrustacea, Crustacea, Branchiopoda, Phyllopoda, Diplostraca, Cladocera (water fleas), Anomopoda, Daphniidae, Daphnia (common water fleas), Daphnia magna	Predicted	1 out of 5		Domain (1)	GDIP01080424;				2016-01-20	2017-02-15
A0A0P5WY62	NZ_LZSE01000010.1:1742-5035	98.93	563	6	0	1606	3294	1	563	0	1134	A0A0P5WY62	A0A0P5WY62_9CRUS	unreviewed	Reverse transcriptase		Daphnia magna	740	unreviewed	35525	cellular organisms, Eukaryota, Opisthokonta, Metazoa, Eumetazoa, Bilateria, Protostomia, Ecdysozoa, Panarthropoda, Arthropoda, Mandibulata, Pancrustacea, Crustacea, Branchiopoda, Phyllopoda, Diplostraca, Cladocera (water fleas), Anomopoda, Daphniidae, Daphnia (common water fleas), Daphnia magna	Predicted	1 out of 5		Domain (1)	GDIP01080476;				2016-01-20	2017-02-15
A0A0P5WYH9	NZ_LZSE01000010.1:1742-5035	98.93	563	6	0	1606	3294	1	563	0	1134	A0A0P5WYH9	A0A0P5WYH9_9CRUS	unreviewed	Reverse transcriptase (Fragment)		Daphnia magna	735	unreviewed	35525	cellular organisms, Eukaryota, Opisthokonta, Metazoa, Eumetazoa, Bilateria, Protostomia, Ecdysozoa, Panarthropoda, Arthropoda, Mandibulata, Pancrustacea, Crustacea, Branchiopoda, Phyllopoda, Diplostraca, Cladocera (water fleas), Anomopoda, Daphniidae, Daphnia (common water fleas), Daphnia magna	Predicted	1 out of 5		Domain (1); Non-terminal residue (1)	GDIP01080477;				2016-01-20	2017-02-15
A0A0P6A062	NZ_PYWJ01000166.1:7-333	100	70	0	0	89	298	1	70	1e-35	156	A0A0P6A062	A0A0P6A062_9CRUS	unreviewed	Uncharacterized protein (Fragment)		Daphnia magna	154	unreviewed	35525	cellular organisms, Eukaryota, Opisthokonta, Metazoa, Eumetazoa, Bilateria, Protostomia, Ecdysozoa, Panarthropoda, Arthropoda, Mandibulata, Pancrustacea, Crustacea, Branchiopoda, Phyllopoda, Diplostraca, Cladocera (water fleas), Anomopoda, Daphniidae, Daphnia (common water fleas), Daphnia magna	Predicted	1 out of 5		Non-terminal residue (2)	GDIP01037344;				2016-01-20	2016-01-20
A0A0P6A0W7	NZ_CVNJ01000005.1:5066-6572	98.91	275	3	0	870	46	1	275	1e-142	515	A0A0P6A0W7	A0A0P6A0W7_9CRUS	unreviewed	Reverse transcriptase (Fragment)		Daphnia magna	335	unreviewed	35525	cellular organisms, Eukaryota, Opisthokonta, Metazoa, Eumetazoa, Bilateria, Protostomia, Ecdysozoa, Panarthropoda, Arthropoda, Mandibulata, Pancrustacea, Crustacea, Branchiopoda, Phyllopoda, Diplostraca, Cladocera (water fleas), Anomopoda, Daphniidae, Daphnia (common water fleas), Daphnia magna	Predicted	1 out of 5		Non-terminal residue (1)	GDIP01036017;				2016-01-20	2016-03-16
A0A0P6A2D6	NZ_FPIJ01000009.1:1501-2185	96.95	164	5	0	3	494	17	180	2e-83	316.6	A0A0P6A2D6	A0A0P6A2D6_9CRUS	unreviewed	Putative 1 codes for a 40 kDa product (Fragment)		Daphnia magna	222	unreviewed	35525	cellular organisms, Eukaryota, Opisthokonta, Metazoa, Eumetazoa, Bilateria, Protostomia, Ecdysozoa, Panarthropoda, Arthropoda, Mandibulata, Pancrustacea, Crustacea, Branchiopoda, Phyllopoda, Diplostraca, Cladocera (water fleas), Anomopoda, Daphniidae, Daphnia (common water fleas), Daphnia magna	Predicted	1 out of 5		Coiled coil (1); Domain (1); Non-terminal residue (1)	GDIP01036170;				2016-01-20	2018-09-12
A0A0P6A4X5	NZ_FRWQ01000132.1:1-1916	98.26	115	2	0	1509	1853	1	115	2e-63	252.3	A0A0P6A4X5	A0A0P6A4X5_9CRUS	unreviewed	Reverse transcriptase (Fragment)		Daphnia magna	205	unreviewed	35525	cellular organisms, Eukaryota, Opisthokonta, Metazoa, Eumetazoa, Bilateria, Protostomia, Ecdysozoa, Panarthropoda, Arthropoda, Mandibulata, Pancrustacea, Crustacea, Branchiopoda, Phyllopoda, Diplostraca, Cladocera (water fleas), Anomopoda, Daphniidae, Daphnia (common water fleas), Daphnia magna	Predicted	1 out of 5		Non-terminal residue (2)	GDIP01035054;				2016-01-20	2016-03-16
A0A0P6A6I3	NZ_FPIH01000010.1:6347-7681	98.18	165	3	0	32	526	1	165	2e-88	335.1	A0A0P6A6I3	A0A0P6A6I3_9CRUS	unreviewed	Reverse transcriptase (Fragment)		Daphnia magna	165	unreviewed	35525	cellular organisms, Eukaryota, Opisthokonta, Metazoa, Eumetazoa, Bilateria, Protostomia, Ecdysozoa, Panarthropoda, Arthropoda, Mandibulata, Pancrustacea, Crustacea, Branchiopoda, Phyllopoda, Diplostraca, Cladocera (water fleas), Anomopoda, Daphniidae, Daphnia (common water fleas), Daphnia magna	Predicted	1 out of 5		Domain (1); Non-terminal residue (2)	GDIP01035177;				2016-01-20	2017-10-25
A0A0P6A6U7	NZ_CKYY01000047.1:125-292	100	56	0	0	168	1	2	57	2e-22	112.1	A0A0P6A6U7	A0A0P6A6U7_9CRUS	unreviewed	Uncharacterized protein		Daphnia magna	97	unreviewed	35525	cellular organisms, Eukaryota, Opisthokonta, Metazoa, Eumetazoa, Bilateria, Protostomia, Ecdysozoa, Panarthropoda, Arthropoda, Mandibulata, Pancrustacea, Crustacea, Branchiopoda, Phyllopoda, Diplostraca, Cladocera (water fleas), Anomopoda, Daphniidae, Daphnia (common water fleas), Daphnia magna	Predicted	1 out of 5			GDIP01033557;				2016-01-20	2016-01-20
A0A0P6A9Z4	NZ_AVCR02000097.1:455-626	100	53	0	0	1	159	58	110	3e-24	118.2	A0A0P6A9Z4	A0A0P6A9Z4_9CRUS	unreviewed	Uncharacterized protein		Daphnia magna	110	unreviewed	35525	cellular organisms, Eukaryota, Opisthokonta, Metazoa, Eumetazoa, Bilateria, Protostomia, Ecdysozoa, Panarthropoda, Arthropoda, Mandibulata, Pancrustacea, Crustacea, Branchiopoda, Phyllopoda, Diplostraca, Cladocera (water fleas), Anomopoda, Daphniidae, Daphnia (common water fleas), Daphnia magna	Predicted	1 out of 5			GDIP01037128;				2016-01-20	2016-01-20
A0A0P6AYJ9	NZ_BFCU01000203.1:107-510	98.13	107	2	0	82	402	1	107	7e-57	226.9	A0A0P6AYJ9	A0A0P6AYJ9_9CRUS	unreviewed	Reverse transcriptase (Fragment)		Daphnia magna	121	unreviewed	35525	cellular organisms, Eukaryota, Opisthokonta, Metazoa, Eumetazoa, Bilateria, Protostomia, Ecdysozoa, Panarthropoda, Arthropoda, Mandibulata, Pancrustacea, Crustacea, Branchiopoda, Phyllopoda, Diplostraca, Cladocera (water fleas), Anomopoda, Daphniidae, Daphnia (common water fleas), Daphnia magna	Predicted	1 out of 5		Non-terminal residue (1)	GDIP01036580;				2016-01-20	2016-03-16
A0A0P6BKH5	NZ_CRTU01000081.1:270-489	97.22	72	2	0	3	218	93	164	4e-26	124.4	A0A0P6BKH5	A0A0P6BKH5_9CRUS	unreviewed	Uncharacterized protein (Fragment)		Daphnia magna	228	unreviewed	35525	cellular organisms, Eukaryota, Opisthokonta, Metazoa, Eumetazoa, Bilateria, Protostomia, Ecdysozoa, Panarthropoda, Arthropoda, Mandibulata, Pancrustacea, Crustacea, Branchiopoda, Phyllopoda, Diplostraca, Cladocera (water fleas), Anomopoda, Daphniidae, Daphnia (common water fleas), Daphnia magna	Predicted	1 out of 5		Non-terminal residue (1)	GDIP01013313;				2016-01-20	2016-01-20
A0A0P6BLV8	NZ_CMHG01000050.1:5-174	100	56	0	0	2	169	11	66	4e-25	120.9	A0A0P6BLV8	A0A0P6BLV8_9CRUS	unreviewed	Uncharacterized protein		Daphnia magna	127	unreviewed	35525	cellular organisms, Eukaryota, Opisthokonta, Metazoa, Eumetazoa, Bilateria, Protostomia, Ecdysozoa, Panarthropoda, Arthropoda, Mandibulata, Pancrustacea, Crustacea, Branchiopoda, Phyllopoda, Diplostraca, Cladocera (water fleas), Anomopoda, Daphniidae, Daphnia (common water fleas), Daphnia magna	Predicted	1 out of 5			GDIP01013326;				2016-01-20	2016-01-20
A0A0P6BPX0	NZ_JXQN01000234.1:1-143	95.74	47	2	0	143	3	36	82	1e-16	92.8	A0A0P6BPX0	A0A0P6BPX0_9CRUS	unreviewed	Uncharacterized protein (Fragment)		Daphnia magna	120	unreviewed	35525	cellular organisms, Eukaryota, Opisthokonta, Metazoa, Eumetazoa, Bilateria, Protostomia, Ecdysozoa, Panarthropoda, Arthropoda, Mandibulata, Pancrustacea, Crustacea, Branchiopoda, Phyllopoda, Diplostraca, Cladocera (water fleas), Anomopoda, Daphniidae, Daphnia (common water fleas), Daphnia magna	Predicted	1 out of 5		Non-terminal residue (2)	GDIP01013328;				2016-01-20	2016-01-20
A0A0P6C3J2	NZ_APVW01000047.1:656-808	100	50	0	0	151	2	12	61	2e-21	109	A0A0P6C3J2	A0A0P6C3J2_9CRUS	unreviewed	Uncharacterized protein		Daphnia magna	87	unreviewed	35525	cellular organisms, Eukaryota, Opisthokonta, Metazoa, Eumetazoa, Bilateria, Protostomia, Ecdysozoa, Panarthropoda, Arthropoda, Mandibulata, Pancrustacea, Crustacea, Branchiopoda, Phyllopoda, Diplostraca, Cladocera (water fleas), Anomopoda, Daphniidae, Daphnia (common water fleas), Daphnia magna	Predicted	1 out of 5			GDIP01014097;				2016-01-20	2016-01-20
A0A0P6C4E7	NZ_LONH01000058.1:2101-5394	98.82	338	4	0	1	1014	1	338	2e-191	678.7	A0A0P6C4E7	A0A0P6C4E7_9CRUS	unreviewed	Reverse transcriptase (Fragment)		Daphnia magna	338	unreviewed	35525	cellular organisms, Eukaryota, Opisthokonta, Metazoa, Eumetazoa, Bilateria, Protostomia, Ecdysozoa, Panarthropoda, Arthropoda, Mandibulata, Pancrustacea, Crustacea, Branchiopoda, Phyllopoda, Diplostraca, Cladocera (water fleas), Anomopoda, Daphniidae, Daphnia (common water fleas), Daphnia magna	Predicted	1 out of 5		Coiled coil (1); Domain (1); Non-terminal residue (1)	GDIP01013713;				2016-01-20	2017-10-25
A0A0P6C8R9	NZ_CVNJ01000005.1:5066-6572	99.45	183	1	0	1497	949	1	183	5e-101	376.7	A0A0P6C8R9	A0A0P6C8R9_9CRUS	unreviewed	Reverse transcriptase (Fragment)		Daphnia magna	183	unreviewed	35525	cellular organisms, Eukaryota, Opisthokonta, Metazoa, Eumetazoa, Bilateria, Protostomia, Ecdysozoa, Panarthropoda, Arthropoda, Mandibulata, Pancrustacea, Crustacea, Branchiopoda, Phyllopoda, Diplostraca, Cladocera (water fleas), Anomopoda, Daphniidae, Daphnia (common water fleas), Daphnia magna	Predicted	1 out of 5		Domain (1); Non-terminal residue (2)	GDIP01004042;				2016-01-20	2017-10-25
A0A0P6C946	NZ_FQLM01000003.1:4122-5041	96.19	236	9	0	918	211	136	371	1e-125	457.2	A0A0P6C946	A0A0P6C946_9CRUS	unreviewed	Uncharacterized protein		Daphnia magna	371	unreviewed	35525	cellular organisms, Eukaryota, Opisthokonta, Metazoa, Eumetazoa, Bilateria, Protostomia, Ecdysozoa, Panarthropoda, Arthropoda, Mandibulata, Pancrustacea, Crustacea, Branchiopoda, Phyllopoda, Diplostraca, Cladocera (water fleas), Anomopoda, Daphniidae, Daphnia (common water fleas), Daphnia magna	Predicted	1 out of 5		Coiled coil (4); Domain (2)	GDIP01004025;				2016-01-20	2018-09-12
A0A0P6CDB6	NZ_CVNI01000002.1:672-1352	99.47	188	1	0	115	678	1	188	6e-109	401	A0A0P6CDB6	A0A0P6CDB6_9CRUS	unreviewed	Reverse transcriptase		Daphnia magna	188	unreviewed	35525	cellular organisms, Eukaryota, Opisthokonta, Metazoa, Eumetazoa, Bilateria, Protostomia, Ecdysozoa, Panarthropoda, Arthropoda, Mandibulata, Pancrustacea, Crustacea, Branchiopoda, Phyllopoda, Diplostraca, Cladocera (water fleas), Anomopoda, Daphniidae, Daphnia (common water fleas), Daphnia magna	Predicted	1 out of 5		Domain (1)	GDIP01003852;				2016-01-20	2016-03-16
A0A0P6CI63	NZ_FQLM01000003.1:15-962	100	255	0	0	934	170	1	255	3e-151	542.7	A0A0P6CI63	A0A0P6CI63_9CRUS	unreviewed	Reverse transcriptase (Fragment)		Daphnia magna	255	unreviewed	35525	cellular organisms, Eukaryota, Opisthokonta, Metazoa, Eumetazoa, Bilateria, Protostomia, Ecdysozoa, Panarthropoda, Arthropoda, Mandibulata, Pancrustacea, Crustacea, Branchiopoda, Phyllopoda, Diplostraca, Cladocera (water fleas), Anomopoda, Daphniidae, Daphnia (common water fleas), Daphnia magna	Predicted	1 out of 5		Non-terminal residue (2)	GDIP01000376;				2016-01-20	2016-03-16
A0A0P6CIJ2	NZ_FQLL01000004.1:3152-3959	98.31	178	3	0	24	557	1	178	3e-97	362.8	A0A0P6CIJ2	A0A0P6CIJ2_9CRUS	unreviewed	Reverse transcriptase (Fragment)		Daphnia magna	178	unreviewed	35525	cellular organisms, Eukaryota, Opisthokonta, Metazoa, Eumetazoa, Bilateria, Protostomia, Ecdysozoa, Panarthropoda, Arthropoda, Mandibulata, Pancrustacea, Crustacea, Branchiopoda, Phyllopoda, Diplostraca, Cladocera (water fleas), Anomopoda, Daphniidae, Daphnia (common water fleas), Daphnia magna	Predicted	1 out of 5		Domain (1); Non-terminal residue (2)	GDIP01004045;				2016-01-20	2017-10-25
A0A0P6CK54	NZ_FWYR01000098.1:64-261	100	30	0	0	198	109	56	85	1e-08	66.2	A0A0P6CK54	A0A0P6CK54_9CRUS	unreviewed	Protein DYZ1L18		Daphnia magna	85	unreviewed	35525	cellular organisms, Eukaryota, Opisthokonta, Metazoa, Eumetazoa, Bilateria, Protostomia, Ecdysozoa, Panarthropoda, Arthropoda, Mandibulata, Pancrustacea, Crustacea, Branchiopoda, Phyllopoda, Diplostraca, Cladocera (water fleas), Anomopoda, Daphniidae, Daphnia (common water fleas), Daphnia magna	Predicted	1 out of 5			GDIP01003250;				2016-01-20	2016-01-20
A0A0P6CKV1	NZ_LZSE01000010.1:1742-5035	98.96	670	7	0	1285	3294	1	670	0	1343.9	A0A0P6CKV1	A0A0P6CKV1_9CRUS	unreviewed	Reverse transcriptase (Fragment)		Daphnia magna	842	unreviewed	35525	cellular organisms, Eukaryota, Opisthokonta, Metazoa, Eumetazoa, Bilateria, Protostomia, Ecdysozoa, Panarthropoda, Arthropoda, Mandibulata, Pancrustacea, Crustacea, Branchiopoda, Phyllopoda, Diplostraca, Cladocera (water fleas), Anomopoda, Daphniidae, Daphnia (common water fleas), Daphnia magna	Predicted	1 out of 5		Domain (1); Non-terminal residue (1)	GDIP01013312;				2016-01-20	2017-11-22
A0A0P6DCK6	NZ_CVNL01000007.1:3-1617	98.34	421	7	0	1500	238	1	421	5e-228	798.9	A0A0P6DCK6	A0A0P6DCK6_9CRUS	unreviewed	Uncharacterized protein (Fragment)		Daphnia magna	421	unreviewed	35525	cellular organisms, Eukaryota, Opisthokonta, Metazoa, Eumetazoa, Bilateria, Protostomia, Ecdysozoa, Panarthropoda, Arthropoda, Mandibulata, Pancrustacea, Crustacea, Branchiopoda, Phyllopoda, Diplostraca, Cladocera (water fleas), Anomopoda, Daphniidae, Daphnia (common water fleas), Daphnia magna	Predicted	1 out of 5		Domain (1); Non-terminal residue (2)	GDIP01002880;				2016-01-20	2017-02-15
A0A0P6DK54	NZ_APIB01000016.1:1-1739	96.1	154	6	0	310	771	1	154	4e-74	287.7	A0A0P6DK54	A0A0P6DK54_9CRUS	unreviewed	Reverse transcriptase (Fragment)		Daphnia magna	154	unreviewed	35525	cellular organisms, Eukaryota, Opisthokonta, Metazoa, Eumetazoa, Bilateria, Protostomia, Ecdysozoa, Panarthropoda, Arthropoda, Mandibulata, Pancrustacea, Crustacea, Branchiopoda, Phyllopoda, Diplostraca, Cladocera (water fleas), Anomopoda, Daphniidae, Daphnia (common water fleas), Daphnia magna	Predicted	1 out of 5		Domain (1); Non-terminal residue (2)	GDIP01000155;				2016-01-20	2017-11-22
A0A0P9CNW5	NZ_ATPG01000103.1:129-850	97.73	44	1	0	567	698	1	44	7e-16	92	A0A0P9CNW5	A0A0P9CNW5_9RHOB	unreviewed	Uncharacterized protein	JI58_00630	Marinosulfonomonas sp. PRT-SC04	96	unreviewed	1527300	cellular organisms, Bacteria, Proteobacteria, Alphaproteobacteria, Rhodobacterales, Rhodobacteraceae, Marinosulfonomonas, Marinosulfonomonas sp. PRT-SC04	Predicted	1 out of 5	CAUTION: The sequence shown here is derived from an EMBL/GenBank/DDBJ whole genome shotgun (WGS) entry which is preliminary data. {ECO:0000313|EMBL:KPU84944.1}.	Domain (1)	JPUR01000056;				2016-01-20	2018-09-12
A0A0Q0RXL4	NZ_LKBH01000228.1:35-344	100	68	0	0	19	222	1	68	3e-32	144.8	A0A0Q0RXL4	A0A0Q0RXL4_9EURY	unreviewed	Uncharacterized protein	AOG55_09025	Acidiplasma cupricumulans	68	unreviewed	312540	cellular organisms, Archaea, Euryarchaeota, Diaforarchaea group, Thermoplasmata, Thermoplasmatales, Ferroplasmaceae, Acidiplasma, Acidiplasma cupricumulans	Predicted	1 out of 5	CAUTION: The sequence shown here is derived from an EMBL/GenBank/DDBJ whole genome shotgun (WGS) entry which is preliminary data. {ECO:0000313|EMBL:KQB34750.1}.		LKBH01000228;	WP_055041057.1;			2016-01-20	2018-10-10
A0A0Q3Q4L3	NZ_FSLH01000042.1:509-706	100	57	0	0	28	198	1	57	1e-29	136	A0A0Q3Q4L3	A0A0Q3Q4L3_9BACI	unreviewed	Uncharacterized protein (Fragment)	AN959_20480	Psychrobacillus sp. FJAT-21963	166	unreviewed	1712028	cellular organisms, Bacteria, Terrabacteria group, Firmicutes, Bacilli, Bacillales, Bacillaceae, Psychrobacillus, Psychrobacillus sp. FJAT-21963	Predicted	1 out of 5	CAUTION: The sequence shown here is derived from an EMBL/GenBank/DDBJ whole genome shotgun (WGS) entry which is preliminary data. {ECO:0000313|EMBL:KQL12400.1}.	Non-terminal residue (1)	LJIY01000039;				2016-01-20	2016-11-02
A0A0Q3RZ19	NZ_KZ794899.1:444-612	97.44	39	1	0	51	167	1	39	2e-14	85.5	A0A0Q3RZ19	A0A0Q3RZ19_9BACI	unreviewed	Uncharacterized protein	AN959_20475	Psychrobacillus sp. FJAT-21963	105	unreviewed	1712028	cellular organisms, Bacteria, Terrabacteria group, Firmicutes, Bacilli, Bacillales, Bacillaceae, Psychrobacillus, Psychrobacillus sp. FJAT-21963	Predicted	1 out of 5	CAUTION: The sequence shown here is derived from an EMBL/GenBank/DDBJ whole genome shotgun (WGS) entry which is preliminary data. {ECO:0000313|EMBL:KQL12404.1}.		LJIY01000037;	WP_050232143.1;			2016-01-20	2017-06-07
A0A0Q9M9J0	NZ_AVCR02000097.1:455-626	98.11	53	1	0	1	159	75	127	3e-23	114.8	A0A0Q9M9J0	A0A0Q9M9J0_9BACL	unreviewed	Uncharacterized protein	ASL11_27505	Paenibacillus sp. Soil750	127	unreviewed	1736398	cellular organisms, Bacteria, Terrabacteria group, Firmicutes, Bacilli, Bacillales, Paenibacillaceae, Paenibacillus, Paenibacillus sp. Soil750	Predicted	1 out of 5	CAUTION: The sequence shown here is derived from an EMBL/GenBank/DDBJ whole genome shotgun (WGS) entry which is preliminary data. {ECO:0000313|EMBL:KRE58751.1}.	Sequence uncertainty (1)	LMSD01000039;	WP_056621948.1;			2016-01-20	2018-04-25
A0A0Q9UHS7	NZ_PJAI01000113.1:102-277	100	34	0	0	75	176	1	34	2e-12	78.6	A0A0Q9UHS7	A0A0Q9UHS7_9BACI	unreviewed	Uncharacterized protein	ASG98_26175	Bacillus sp. Soil531	65	unreviewed	1736389	cellular organisms, Bacteria, Terrabacteria group, Firmicutes, Bacilli, Bacillales, Bacillaceae, Bacillus, Bacillus sp. Soil531	Predicted	1 out of 5	CAUTION: The sequence shown here is derived from an EMBL/GenBank/DDBJ whole genome shotgun (WGS) entry which is preliminary data. {ECO:0000313|EMBL:KRF51394.1}.		LMSY01000016;	WP_021666093.1;			2016-01-20	2017-06-07
A0A0Q9UU44	NZ_KZ794899.1:444-612	97.96	49	1	0	21	167	1	49	8e-21	106.7	A0A0Q9UU44	A0A0Q9UU44_9BACI	unreviewed	Uncharacterized protein	ASG98_26180	Bacillus sp. Soil531	115	unreviewed	1736389	cellular organisms, Bacteria, Terrabacteria group, Firmicutes, Bacilli, Bacillales, Bacillaceae, Bacillus, Bacillus sp. Soil531	Predicted	1 out of 5	CAUTION: The sequence shown here is derived from an EMBL/GenBank/DDBJ whole genome shotgun (WGS) entry which is preliminary data. {ECO:0000313|EMBL:KRF51395.1}.		LMSY01000016;	WP_021739601.1;			2016-01-20	2017-06-07
A0A0S4WN42	NZ_FRFB01000025.1:1-325	98.33	60	1	0	242	63	1	60	9e-27	126.7	A0A0S4WN42	A0A0S4WN42_RALSL	unreviewed	Uncharacterized protein	TO10_v1_2400001	Ralstonia solanacearum (Pseudomonas solanacearum)	60	unreviewed	305	cellular organisms, Bacteria, Proteobacteria, Betaproteobacteria, Burkholderiales, Burkholderiaceae, Ralstonia, Ralstonia solanacearum (Pseudomonas solanacearum)	Predicted	1 out of 5		Domain (1)	LN899827;				2016-02-17	2016-04-13
A0A0T9GAK9	NZ_CVWE01000769.1:1-147	97.87	47	1	0	147	7	10	56	2e-20	105.5	A0A0T9GAK9	A0A0T9GAK9_MYCTX	unreviewed	Uncharacterized protein	ERS124837_00009	Mycobacterium tuberculosis	76	unreviewed	1773	cellular organisms, Bacteria, Terrabacteria group, Actinobacteria, Actinobacteria (high G+C Gram-positive bacteria), Corynebacteriales, Mycobacteriaceae, Mycobacterium, Mycobacterium tuberculosis complex, Mycobacterium tuberculosis	Predicted	1 out of 5			CPAQ01000082;				2016-02-17	2017-08-30
A0A0U1CSQ7	NZ_AKPL01000008.1:1-2797	100	65	0	0	1764	1570	1	65	3e-28	136.3	A0A0U1CSQ7	A0A0U1CSQ7_CHLTH	unreviewed	Uncharacterized protein	ERS177788_05255	Chlamydia trachomatis	65	unreviewed	813	cellular organisms, Bacteria, PVC group, Chlamydiae, Chlamydiia, Chlamydiales, Chlamydiaceae, Chlamydia/Chlamydophila group, Chlamydia, Chlamydia trachomatis	Predicted	1 out of 5			CTBL01001403;				2016-02-17	2017-08-30
A0A0U1N3C3	NZ_CGZQ01000144.1:1-142	100	43	0	0	14	142	1	43	6e-18	97.1	A0A0U1N3C3	A0A0U1N3C3_CHLTH	unreviewed	Uncharacterized protein	ERS133252_00939	Chlamydia trachomatis	64	unreviewed	813	cellular organisms, Bacteria, PVC group, Chlamydiae, Chlamydiia, Chlamydiales, Chlamydiaceae, Chlamydia/Chlamydophila group, Chlamydia, Chlamydia trachomatis	Predicted	1 out of 5			CVPJ01000425;				2016-02-17	2017-08-30
A0A0U1N3C7	NZ_CGZQ01000057.1:2287-2455	100	56	0	0	2	169	50	105	3e-24	118.2	A0A0U1N3C7	A0A0U1N3C7_CHLTH	unreviewed	Uncharacterized protein	ERS133252_00962	Chlamydia trachomatis	108	unreviewed	813	cellular organisms, Bacteria, PVC group, Chlamydiae, Chlamydiia, Chlamydiales, Chlamydiaceae, Chlamydia/Chlamydophila group, Chlamydia, Chlamydia trachomatis	Predicted	1 out of 5			CVPJ01000460;				2016-02-17	2017-08-30
A0A0U1N3J4	NZ_CGZQ01000057.1:2964-3132	100	55	0	0	2	166	29	83	6e-24	117.1	A0A0U1N3J4	A0A0U1N3J4_CHLTH	unreviewed	Uncharacterized protein	ERS133252_01031	Chlamydia trachomatis	83	unreviewed	813	cellular organisms, Bacteria, PVC group, Chlamydiae, Chlamydiia, Chlamydiales, Chlamydiaceae, Chlamydia/Chlamydophila group, Chlamydia, Chlamydia trachomatis	Predicted	1 out of 5			CVPJ01000629;				2016-02-17	2017-08-30
A0A0U1N3N3	NZ_NRUT01000108.1:1405-1575	100	57	0	0	171	1	39	95	9e-28	129.8	A0A0U1N3N3	A0A0U1N3N3_CHLTH	unreviewed	Uncharacterized protein	ERS133252_01015	Chlamydia trachomatis	135	unreviewed	813	cellular organisms, Bacteria, PVC group, Chlamydiae, Chlamydiia, Chlamydiales, Chlamydiaceae, Chlamydia/Chlamydophila group, Chlamydia, Chlamydia trachomatis	Predicted	1 out of 5			CVPJ01000585;				2016-02-17	2017-08-30
A0A0U1N3R8	NZ_LCSI01000029.1:552-738	100	44	0	0	3	134	2	55	8e-16	90.1	A0A0U1N3R8	A0A0U1N3R8_CHLTH	unreviewed	Uncharacterized protein	ERS133252_01110	Chlamydia trachomatis	55	unreviewed	813	cellular organisms, Bacteria, PVC group, Chlamydiae, Chlamydiia, Chlamydiales, Chlamydiaceae, Chlamydia/Chlamydophila group, Chlamydia, Chlamydia trachomatis	Predicted	1 out of 5			CVPJ01001140;				2016-02-17	2017-08-30
A0A0U1N3U6	NZ_FWYR01000098.1:64-261	100	30	0	0	198	109	13	42	1e-08	66.2	A0A0U1N3U6	A0A0U1N3U6_CHLTH	unreviewed	Uncharacterized protein	ERS133252_01141	Chlamydia trachomatis	42	unreviewed	813	cellular organisms, Bacteria, PVC group, Chlamydiae, Chlamydiia, Chlamydiales, Chlamydiaceae, Chlamydia/Chlamydophila group, Chlamydia, Chlamydia trachomatis	Predicted	1 out of 5			CVPJ01001579;				2016-02-17	2017-08-30
A0A0U1N5C8	NZ_NHQS01000128.1:326-489	100	54	0	0	162	1	5	63	6e-24	117.1	A0A0U1N5C8	A0A0U1N5C8_CHLTH	unreviewed	Uncharacterized protein	ERS133252_01064	Chlamydia trachomatis	79	unreviewed	813	cellular organisms, Bacteria, PVC group, Chlamydiae, Chlamydiia, Chlamydiales, Chlamydiaceae, Chlamydia/Chlamydophila group, Chlamydia, Chlamydia trachomatis	Predicted	1 out of 5			CVPJ01000750;				2016-02-17	2017-08-30
A0A0V0SPW3	NZ_ABGO01000756.1:1-785	96.77	31	1	0	367	275	1	31	7e-10	72.4	A0A0V0SPW3	A0A0V0SPW3_9BILA	unreviewed	Uncharacterized protein	T05_8470	Trichinella murrelli	37	unreviewed	144512	cellular organisms, Eukaryota, Opisthokonta, Metazoa, Eumetazoa, Bilateria, Protostomia, Ecdysozoa, Nematoda (roundworms), Enoplea, Dorylaimia, Trichinellida, Trichinellidae, Trichinella, Trichinella murrelli	Predicted	1 out of 5	CAUTION: The sequence shown here is derived from an EMBL/GenBank/DDBJ whole genome shotgun (WGS) entry which is preliminary data. {ECO:0000313|EMBL:KRX28762.1}.		JYDJ01004077;				2016-03-16	2017-12-20
A0A0V0SPY1	NZ_CIEA01000093.1:1958-2181	100	32	0	0	6	101	1	32	6e-12	77.4	A0A0V0SPY1	A0A0V0SPY1_9BILA	unreviewed	Uncharacterized protein	T06_6519	Trichinella sp. T6	32	unreviewed	92179	cellular organisms, Eukaryota, Opisthokonta, Metazoa, Eumetazoa, Bilateria, Protostomia, Ecdysozoa, Nematoda (roundworms), Enoplea, Dorylaimia, Trichinellida, Trichinellidae, Trichinella, Trichinella sp. T6	Predicted	1 out of 5	CAUTION: The sequence shown here is derived from an EMBL/GenBank/DDBJ whole genome shotgun (WGS) entry which is preliminary data. {ECO:0000313|EMBL:KRX28766.1}.		JYDK01005325;				2016-03-16	2017-12-20
A0A0V0SSG3	NZ_BFCS01000233.1:352-522	96.43	28	1	0	88	171	1	28	1e-09	69.7	A0A0V0SSG3	A0A0V0SSG3_9BILA	unreviewed	Uncharacterized protein	T06_7619	Trichinella sp. T6	60	unreviewed	92179	cellular organisms, Eukaryota, Opisthokonta, Metazoa, Eumetazoa, Bilateria, Protostomia, Ecdysozoa, Nematoda (roundworms), Enoplea, Dorylaimia, Trichinellida, Trichinellidae, Trichinella, Trichinella sp. T6	Predicted	1 out of 5	CAUTION: The sequence shown here is derived from an EMBL/GenBank/DDBJ whole genome shotgun (WGS) entry which is preliminary data. {ECO:0000313|EMBL:KRX29478.1}.		JYDK01004509;				2016-03-16	2017-12-20
A0A0V0SUE5	NZ_CIEA01000093.1:1088-1286	100	30	0	0	110	199	1	30	5e-09	67.8	A0A0V0SUE5	A0A0V0SUE5_9BILA	unreviewed	Uncharacterized protein	T06_2414	Trichinella sp. T6	86	unreviewed	92179	cellular organisms, Eukaryota, Opisthokonta, Metazoa, Eumetazoa, Bilateria, Protostomia, Ecdysozoa, Nematoda (roundworms), Enoplea, Dorylaimia, Trichinellida, Trichinellidae, Trichinella, Trichinella sp. T6	Predicted	1 out of 5	CAUTION: The sequence shown here is derived from an EMBL/GenBank/DDBJ whole genome shotgun (WGS) entry which is preliminary data. {ECO:0000313|EMBL:KRX30267.1}.		JYDK01003859;				2016-03-16	2017-12-20
A0A0V0T020	NZ_PDGJ01000171.1:97-293	100	27	0	0	33	113	8	34	4e-08	64.7	A0A0V0T020	A0A0V0T020_9BILA	unreviewed	Uncharacterized protein	T06_945	Trichinella sp. T6	34	unreviewed	92179	cellular organisms, Eukaryota, Opisthokonta, Metazoa, Eumetazoa, Bilateria, Protostomia, Ecdysozoa, Nematoda (roundworms), Enoplea, Dorylaimia, Trichinellida, Trichinellidae, Trichinella, Trichinella sp. T6	Predicted	1 out of 5	CAUTION: The sequence shown here is derived from an EMBL/GenBank/DDBJ whole genome shotgun (WGS) entry which is preliminary data. {ECO:0000313|EMBL:KRX32388.1}.		JYDK01002481;				2016-03-16	2017-12-20
A0A0V0T0P1	NZ_FWYR01000098.1:64-261	96.67	30	1	0	198	109	71	100	5e-08	64.3	A0A0V0T0P1	A0A0V0T0P1_9BILA	unreviewed	Uncharacterized protein	T06_11497	Trichinella sp. T6	100	unreviewed	92179	cellular organisms, Eukaryota, Opisthokonta, Metazoa, Eumetazoa, Bilateria, Protostomia, Ecdysozoa, Nematoda (roundworms), Enoplea, Dorylaimia, Trichinellida, Trichinellidae, Trichinella, Trichinella sp. T6	Predicted	1 out of 5	CAUTION: The sequence shown here is derived from an EMBL/GenBank/DDBJ whole genome shotgun (WGS) entry which is preliminary data. {ECO:0000313|EMBL:KRX32633.1}.		JYDK01002361;				2016-03-16	2017-12-20
A0A0V0T476	NZ_BFCU01000233.1:42-197	95.83	48	2	0	13	156	1	48	9e-23	113.2	A0A0V0T476	A0A0V0T476_9BILA	unreviewed	Uncharacterized protein	T06_6413	Trichinella sp. T6	157	unreviewed	92179	cellular organisms, Eukaryota, Opisthokonta, Metazoa, Eumetazoa, Bilateria, Protostomia, Ecdysozoa, Nematoda (roundworms), Enoplea, Dorylaimia, Trichinellida, Trichinellidae, Trichinella, Trichinella sp. T6	Predicted	1 out of 5	CAUTION: The sequence shown here is derived from an EMBL/GenBank/DDBJ whole genome shotgun (WGS) entry which is preliminary data. {ECO:0000313|EMBL:KRX33834.1}.		JYDK01001944;				2016-03-16	2017-12-20
A0A0V0T4R6	NZ_QEMY01001274.1:112-320	100	43	0	0	3	131	50	92	2e-17	95.9	A0A0V0T4R6	A0A0V0T4R6_9BILA	unreviewed	Uncharacterized protein	T06_12037	Trichinella sp. T6	92	unreviewed	92179	cellular organisms, Eukaryota, Opisthokonta, Metazoa, Eumetazoa, Bilateria, Protostomia, Ecdysozoa, Nematoda (roundworms), Enoplea, Dorylaimia, Trichinellida, Trichinellidae, Trichinella, Trichinella sp. T6	Predicted	1 out of 5	CAUTION: The sequence shown here is derived from an EMBL/GenBank/DDBJ whole genome shotgun (WGS) entry which is preliminary data. {ECO:0000313|EMBL:KRX33995.1}.		JYDK01001905;				2016-03-16	2017-12-20
A0A0V0TUK8	NZ_CIEA01000101.1:1-1286	99.07	214	2	0	429	1070	1	214	7e-115	422.5	A0A0V0TUK8	A0A0V0TUK8_9BILA	unreviewed	Putative transposase element	T06_16693	Trichinella sp. T6	214	unreviewed	92179	cellular organisms, Eukaryota, Opisthokonta, Metazoa, Eumetazoa, Bilateria, Protostomia, Ecdysozoa, Nematoda (roundworms), Enoplea, Dorylaimia, Trichinellida, Trichinellidae, Trichinella, Trichinella sp. T6	Predicted	1 out of 5	CAUTION: The sequence shown here is derived from an EMBL/GenBank/DDBJ whole genome shotgun (WGS) entry which is preliminary data. {ECO:0000313|EMBL:KRX42724.1}.	Domain (2)	JYDK01001285;				2016-03-16	2018-09-12
A0A0V0V2R0	NZ_AKPL01000008.1:1-2797	97.14	35	1	0	1512	1408	1	35	1e-09	74.3	A0A0V0V2R0	A0A0V0V2R0_9BILA	unreviewed	Uncharacterized protein	T06_3624	Trichinella sp. T6	112	unreviewed	92179	cellular organisms, Eukaryota, Opisthokonta, Metazoa, Eumetazoa, Bilateria, Protostomia, Ecdysozoa, Nematoda (roundworms), Enoplea, Dorylaimia, Trichinellida, Trichinellidae, Trichinella, Trichinella sp. T6	Predicted	1 out of 5	CAUTION: The sequence shown here is derived from an EMBL/GenBank/DDBJ whole genome shotgun (WGS) entry which is preliminary data. {ECO:0000313|EMBL:KRX57830.1}.		JYDK01000622;				2016-03-16	2017-12-20
A0A0V0V388	NZ_JUHZ01000053.1:599-3892	99.36	1098	7	0	3294	1	1	1098	0	2197.5	A0A0V0V388	A0A0V0V388_9BILA	unreviewed	LINE-1 reverse transcriptase-like protein	T06_8113	Trichinella sp. T6	1275	unreviewed	92179	cellular organisms, Eukaryota, Opisthokonta, Metazoa, Eumetazoa, Bilateria, Protostomia, Ecdysozoa, Nematoda (roundworms), Enoplea, Dorylaimia, Trichinellida, Trichinellidae, Trichinella, Trichinella sp. T6	Predicted	1 out of 5	CAUTION: The sequence shown here is derived from an EMBL/GenBank/DDBJ whole genome shotgun (WGS) entry which is preliminary data. {ECO:0000313|EMBL:KRX57831.1}.	Coiled coil (1); Domain (1)	JYDK01000622;				2016-03-16	2018-02-28
A0A0V0V395	NZ_ADJX01000020.1:1-918	95.83	48	2	0	64	207	40	87	4e-15	90.5	A0A0V0V395	A0A0V0V395_9BILA	unreviewed	Uncharacterized protein	T06_24	Trichinella sp. T6	87	unreviewed	92179	cellular organisms, Eukaryota, Opisthokonta, Metazoa, Eumetazoa, Bilateria, Protostomia, Ecdysozoa, Nematoda (roundworms), Enoplea, Dorylaimia, Trichinellida, Trichinellidae, Trichinella, Trichinella sp. T6	Predicted	1 out of 5	CAUTION: The sequence shown here is derived from an EMBL/GenBank/DDBJ whole genome shotgun (WGS) entry which is preliminary data. {ECO:0000313|EMBL:KRX57829.1}.	Transmembrane (3)	JYDK01000622;				2016-03-16	2017-12-20
A0A0V1DEY1	NZ_AIOD01000141.1:1-543	100	67	0	0	317	117	1	67	1e-30	140.2	A0A0V1DEY1	A0A0V1DEY1_TRIPS	unreviewed	LINE-1 reverse transcriptase-like protein	T4A_2477	Trichinella pseudospiralis (Parasitic roundworm)	73	unreviewed	6337	cellular organisms, Eukaryota, Opisthokonta, Metazoa, Eumetazoa, Bilateria, Protostomia, Ecdysozoa, Nematoda (roundworms), Enoplea, Dorylaimia, Trichinellida, Trichinellidae, Trichinella, Trichinella pseudospiralis (Parasitic roundworm)	Predicted	1 out of 5	CAUTION: The sequence shown here is derived from an EMBL/GenBank/DDBJ whole genome shotgun (WGS) entry which is preliminary data. {ECO:0000313|EMBL:KRY60140.1}.		JYDR01003452;				2016-03-16	2017-12-20
A0A0V1DJG7	NZ_MKZW03000004.1:602-748	96.3	27	1	0	132	52	50	76	5e-08	64.3	A0A0V1DJG7	A0A0V1DJG7_TRIPS	unreviewed	Uncharacterized protein (Fragment)	T4A_6883	Trichinella pseudospiralis (Parasitic roundworm)	79	unreviewed	6337	cellular organisms, Eukaryota, Opisthokonta, Metazoa, Eumetazoa, Bilateria, Protostomia, Ecdysozoa, Nematoda (roundworms), Enoplea, Dorylaimia, Trichinellida, Trichinellidae, Trichinella, Trichinella pseudospiralis (Parasitic roundworm)	Predicted	1 out of 5	CAUTION: The sequence shown here is derived from an EMBL/GenBank/DDBJ whole genome shotgun (WGS) entry which is preliminary data. {ECO:0000313|EMBL:KRY61695.1}.	Non-terminal residue (1)	JYDR01003263;				2016-03-16	2017-12-20
A0A0V1DLH3	NZ_NFRR01000254.1:5-175	100	40	0	0	12	131	5	44	1e-12	79.7	A0A0V1DLH3	A0A0V1DLH3_TRIPS	unreviewed	Uncharacterized protein	T4D_15793	Trichinella pseudospiralis (Parasitic roundworm)	44	unreviewed	6337	cellular organisms, Eukaryota, Opisthokonta, Metazoa, Eumetazoa, Bilateria, Protostomia, Ecdysozoa, Nematoda (roundworms), Enoplea, Dorylaimia, Trichinellida, Trichinellidae, Trichinella, Trichinella pseudospiralis (Parasitic roundworm)	Predicted	1 out of 5	CAUTION: The sequence shown here is derived from an EMBL/GenBank/DDBJ whole genome shotgun (WGS) entry which is preliminary data. {ECO:0000313|EMBL:KRY62257.1}.		JYDT01003600;				2016-03-16	2017-12-20
A0A0V1DMC6	NZ_AIOD01000134.1:1-319	97.5	40	1	0	144	263	8	47	2e-14	85.9	A0A0V1DMC6	A0A0V1DMC6_TRIPS	unreviewed	Uncharacterized protein	T4A_2302	Trichinella pseudospiralis (Parasitic roundworm)	47	unreviewed	6337	cellular organisms, Eukaryota, Opisthokonta, Metazoa, Eumetazoa, Bilateria, Protostomia, Ecdysozoa, Nematoda (roundworms), Enoplea, Dorylaimia, Trichinellida, Trichinellidae, Trichinella, Trichinella pseudospiralis (Parasitic roundworm)	Predicted	1 out of 5	CAUTION: The sequence shown here is derived from an EMBL/GenBank/DDBJ whole genome shotgun (WGS) entry which is preliminary data. {ECO:0000313|EMBL:KRY62743.1}.	Transmembrane (1)	JYDR01001922;				2016-03-16	2017-12-20
A0A0V1DPS8	NZ_MRTE01000032.1:406-569	100	47	0	0	145	5	1	47	1e-18	99.8	A0A0V1DPS8	A0A0V1DPS8_TRIPS	unreviewed	Uncharacterized protein (Fragment)	T4D_15114	Trichinella pseudospiralis (Parasitic roundworm)	47	unreviewed	6337	cellular organisms, Eukaryota, Opisthokonta, Metazoa, Eumetazoa, Bilateria, Protostomia, Ecdysozoa, Nematoda (roundworms), Enoplea, Dorylaimia, Trichinellida, Trichinellidae, Trichinella, Trichinella pseudospiralis (Parasitic roundworm)	Predicted	1 out of 5	CAUTION: The sequence shown here is derived from an EMBL/GenBank/DDBJ whole genome shotgun (WGS) entry which is preliminary data. {ECO:0000313|EMBL:KRY63564.1}.	Non-terminal residue (1)	JYDT01002214;				2016-03-16	2017-12-20
A0A0V1DQ65	NZ_ANGH02000119.1:401-567	97.87	47	1	0	12	152	1	47	3e-19	101.3	A0A0V1DQ65	A0A0V1DQ65_TRIPS	unreviewed	Uncharacterized protein	T4D_325	Trichinella pseudospiralis (Parasitic roundworm)	47	unreviewed	6337	cellular organisms, Eukaryota, Opisthokonta, Metazoa, Eumetazoa, Bilateria, Protostomia, Ecdysozoa, Nematoda (roundworms), Enoplea, Dorylaimia, Trichinellida, Trichinellidae, Trichinella, Trichinella pseudospiralis (Parasitic roundworm)	Predicted	1 out of 5	CAUTION: The sequence shown here is derived from an EMBL/GenBank/DDBJ whole genome shotgun (WGS) entry which is preliminary data. {ECO:0000313|EMBL:KRY63563.1}.		JYDT01002214;				2016-03-16	2017-12-20
A0A0V1DQK0	NZ_AAXW01000147.1:256-1175	100	60	0	0	628	807	19	78	2e-26	128.3	A0A0V1DQK0	A0A0V1DQK0_TRIPS	unreviewed	Uncharacterized protein	T4A_7696	Trichinella pseudospiralis (Parasitic roundworm)	78	unreviewed	6337	cellular organisms, Eukaryota, Opisthokonta, Metazoa, Eumetazoa, Bilateria, Protostomia, Ecdysozoa, Nematoda (roundworms), Enoplea, Dorylaimia, Trichinellida, Trichinellidae, Trichinella, Trichinella pseudospiralis (Parasitic roundworm)	Predicted	1 out of 5	CAUTION: The sequence shown here is derived from an EMBL/GenBank/DDBJ whole genome shotgun (WGS) entry which is preliminary data. {ECO:0000313|EMBL:KRY63838.1}.	Transmembrane (1)	JYDR01000837;				2016-03-16	2017-12-20
A0A0V1DRP6	NZ_CMHG01000050.1:5-174	100	56	0	0	2	169	11	66	4e-25	120.9	A0A0V1DRP6	A0A0V1DRP6_TRIPS	unreviewed	Uncharacterized protein	T4A_3745	Trichinella pseudospiralis (Parasitic roundworm)	127	unreviewed	6337	cellular organisms, Eukaryota, Opisthokonta, Metazoa, Eumetazoa, Bilateria, Protostomia, Ecdysozoa, Nematoda (roundworms), Enoplea, Dorylaimia, Trichinellida, Trichinellidae, Trichinella, Trichinella pseudospiralis (Parasitic roundworm)	Predicted	1 out of 5	CAUTION: The sequence shown here is derived from an EMBL/GenBank/DDBJ whole genome shotgun (WGS) entry which is preliminary data. {ECO:0000313|EMBL:KRY63651.1}.		JYDR01001009;				2016-03-16	2017-12-20
A0A0V1GAN6	NZ_MPTL01000080.1:135-305	100	36	0	0	146	39	31	66	4e-12	77.8	A0A0V1GAN6	A0A0V1GAN6_TRIPS	unreviewed	Uncharacterized protein	T4B_14678	Trichinella pseudospiralis (Parasitic roundworm)	67	unreviewed	6337	cellular organisms, Eukaryota, Opisthokonta, Metazoa, Eumetazoa, Bilateria, Protostomia, Ecdysozoa, Nematoda (roundworms), Enoplea, Dorylaimia, Trichinellida, Trichinellidae, Trichinella, Trichinella pseudospiralis (Parasitic roundworm)	Predicted	1 out of 5	CAUTION: The sequence shown here is derived from an EMBL/GenBank/DDBJ whole genome shotgun (WGS) entry which is preliminary data. {ECO:0000313|EMBL:KRY95212.1}.		JYDS01004406;				2016-03-16	2017-12-20
A0A0V1GB16	NZ_LZSC01000066.1:800-960	96.23	53	2	0	160	2	2	69	2e-23	115.2	A0A0V1GB16	A0A0V1GB16_TRIPS	unreviewed	Uncharacterized protein	T4B_1394	Trichinella pseudospiralis (Parasitic roundworm)	75	unreviewed	6337	cellular organisms, Eukaryota, Opisthokonta, Metazoa, Eumetazoa, Bilateria, Protostomia, Ecdysozoa, Nematoda (roundworms), Enoplea, Dorylaimia, Trichinellida, Trichinellidae, Trichinella, Trichinella pseudospiralis (Parasitic roundworm)	Predicted	1 out of 5	CAUTION: The sequence shown here is derived from an EMBL/GenBank/DDBJ whole genome shotgun (WGS) entry which is preliminary data. {ECO:0000313|EMBL:KRY95450.1}.		JYDS01004138;				2016-03-16	2017-12-20
A0A0V1GGS5	NZ_FXYJ02000029.1:60-867	95.65	46	1	1	252	389	1	45	1e-15	91.7	A0A0V1GGS5	A0A0V1GGS5_TRIPS	unreviewed	Uncharacterized protein	T4B_635	Trichinella pseudospiralis (Parasitic roundworm)	67	unreviewed	6337	cellular organisms, Eukaryota, Opisthokonta, Metazoa, Eumetazoa, Bilateria, Protostomia, Ecdysozoa, Nematoda (roundworms), Enoplea, Dorylaimia, Trichinellida, Trichinellidae, Trichinella, Trichinella pseudospiralis (Parasitic roundworm)	Predicted	1 out of 5	CAUTION: The sequence shown here is derived from an EMBL/GenBank/DDBJ whole genome shotgun (WGS) entry which is preliminary data. {ECO:0000313|EMBL:KRY97473.1}.	Transmembrane (1)	JYDS01002386;				2016-03-16	2017-12-20
A0A0V1GH34	NZ_MZMX01000004.1:1-241	96.43	28	1	0	59	142	22	49	1e-08	66.2	A0A0V1GH34	A0A0V1GH34_TRIPS	unreviewed	Uncharacterized protein	T4B_12029	Trichinella pseudospiralis (Parasitic roundworm)	49	unreviewed	6337	cellular organisms, Eukaryota, Opisthokonta, Metazoa, Eumetazoa, Bilateria, Protostomia, Ecdysozoa, Nematoda (roundworms), Enoplea, Dorylaimia, Trichinellida, Trichinellidae, Trichinella, Trichinella pseudospiralis (Parasitic roundworm)	Predicted	1 out of 5	CAUTION: The sequence shown here is derived from an EMBL/GenBank/DDBJ whole genome shotgun (WGS) entry which is preliminary data. {ECO:0000313|EMBL:KRY97595.1}.		JYDS01002297;				2016-03-16	2017-12-20
A0A0V1LWZ4	NZ_BBKD01000412.1:197-971	96.77	62	2	0	423	608	1	62	4e-28	132.9	A0A0V1LWZ4	A0A0V1LWZ4_9BILA	unreviewed	Retrovirus-related Pol polyprotein LINE-1	Pol T10_3437	Trichinella papuae	75	unreviewed	268474	cellular organisms, Eukaryota, Opisthokonta, Metazoa, Eumetazoa, Bilateria, Protostomia, Ecdysozoa, Nematoda (roundworms), Enoplea, Dorylaimia, Trichinellida, Trichinellidae, Trichinella, Trichinella papuae	Predicted	1 out of 5	CAUTION: The sequence shown here is derived from an EMBL/GenBank/DDBJ whole genome shotgun (WGS) entry which is preliminary data. {ECO:0000313|EMBL:KRZ63990.1}.	Domain (1)	JYDO01001613;				2016-03-16	2017-12-20
A0A0V1LXS4	NZ_NHQS01000128.1:326-489	98.15	54	1	0	163	2	3	66	2e-24	119	A0A0V1LXS4	A0A0V1LXS4_9BILA	unreviewed	Uncharacterized protein	T10_9282	Trichinella papuae	87	unreviewed	268474	cellular organisms, Eukaryota, Opisthokonta, Metazoa, Eumetazoa, Bilateria, Protostomia, Ecdysozoa, Nematoda (roundworms), Enoplea, Dorylaimia, Trichinellida, Trichinellidae, Trichinella, Trichinella papuae	Predicted	1 out of 5	CAUTION: The sequence shown here is derived from an EMBL/GenBank/DDBJ whole genome shotgun (WGS) entry which is preliminary data. {ECO:0000313|EMBL:KRZ64314.1}.		JYDO01001231;				2016-03-16	2017-12-20
A0A0V1LYT2	NZ_APIH01000023.1:1-599	97.73	44	1	0	451	320	21	64	2e-16	93.2	A0A0V1LYT2	A0A0V1LYT2_9BILA	unreviewed	Uncharacterized protein	T10_5541	Trichinella papuae	64	unreviewed	268474	cellular organisms, Eukaryota, Opisthokonta, Metazoa, Eumetazoa, Bilateria, Protostomia, Ecdysozoa, Nematoda (roundworms), Enoplea, Dorylaimia, Trichinellida, Trichinellidae, Trichinella, Trichinella papuae	Predicted	1 out of 5	CAUTION: The sequence shown here is derived from an EMBL/GenBank/DDBJ whole genome shotgun (WGS) entry which is preliminary data. {ECO:0000313|EMBL:KRZ64599.1}.		JYDO01000936;				2016-03-16	2017-12-20
A0A0V1LZC0	NZ_BFCU01000177.1:162-301	100	34	0	0	102	1	16	49	5e-09	67.4	A0A0V1LZC0	A0A0V1LZC0_9BILA	unreviewed	Uncharacterized protein (Fragment)	T10_3213	Trichinella papuae	89	unreviewed	268474	cellular organisms, Eukaryota, Opisthokonta, Metazoa, Eumetazoa, Bilateria, Protostomia, Ecdysozoa, Nematoda (roundworms), Enoplea, Dorylaimia, Trichinellida, Trichinellidae, Trichinella, Trichinella papuae	Predicted	1 out of 5	CAUTION: The sequence shown here is derived from an EMBL/GenBank/DDBJ whole genome shotgun (WGS) entry which is preliminary data. {ECO:0000313|EMBL:KRZ64857.1}.	Non-terminal residue (1)	JYDO01000716;				2016-03-16	2017-12-20
A0A0V1LZI4	NZ_CMHF01000064.1:1696-1889	96.88	64	2	0	3	194	5	73	2e-26	125.2	A0A0V1LZI4	A0A0V1LZI4_9BILA	unreviewed	Uncharacterized protein (Fragment)	T10_10196	Trichinella papuae	199	unreviewed	268474	cellular organisms, Eukaryota, Opisthokonta, Metazoa, Eumetazoa, Bilateria, Protostomia, Ecdysozoa, Nematoda (roundworms), Enoplea, Dorylaimia, Trichinellida, Trichinellidae, Trichinella, Trichinella papuae	Predicted	1 out of 5	CAUTION: The sequence shown here is derived from an EMBL/GenBank/DDBJ whole genome shotgun (WGS) entry which is preliminary data. {ECO:0000313|EMBL:KRZ64881.1}.	Non-terminal residue (1)	JYDO01000694;				2016-03-16	2017-12-20
A0A0V1LZP1	NZ_CSAF01000513.1:162-307	96.77	31	1	0	145	53	51	81	1e-08	66.2	A0A0V1LZP1	A0A0V1LZP1_9BILA	unreviewed	Uncharacterized protein	T10_5695	Trichinella papuae	81	unreviewed	268474	cellular organisms, Eukaryota, Opisthokonta, Metazoa, Eumetazoa, Bilateria, Protostomia, Ecdysozoa, Nematoda (roundworms), Enoplea, Dorylaimia, Trichinellida, Trichinellidae, Trichinella, Trichinella papuae	Predicted	1 out of 5	CAUTION: The sequence shown here is derived from an EMBL/GenBank/DDBJ whole genome shotgun (WGS) entry which is preliminary data. {ECO:0000313|EMBL:KRZ64950.1}.		JYDO01000639;				2016-03-16	2017-12-20
A0A0V1LZX7	NZ_PNRN01000333.1:8-320	97.06	34	1	0	49	150	12	45	3e-11	75.1	A0A0V1LZX7	A0A0V1LZX7_9BILA	unreviewed	Uncharacterized protein	T10_2136	Trichinella papuae	72	unreviewed	268474	cellular organisms, Eukaryota, Opisthokonta, Metazoa, Eumetazoa, Bilateria, Protostomia, Ecdysozoa, Nematoda (roundworms), Enoplea, Dorylaimia, Trichinellida, Trichinellidae, Trichinella, Trichinella papuae	Predicted	1 out of 5	CAUTION: The sequence shown here is derived from an EMBL/GenBank/DDBJ whole genome shotgun (WGS) entry which is preliminary data. {ECO:0000313|EMBL:KRZ64722.1}.		JYDO01000837;				2016-03-16	2017-12-20
A0A0V1M0G1	NZ_LZSE01000010.1:1742-5035	95.38	563	5	1	1606	3294	1	542	0	1079.3	A0A0V1M0G1	A0A0V1M0G1_9BILA	unreviewed	LINE-1 reverse transcriptase-like protein (Fragment)	T10_12217	Trichinella papuae	621	unreviewed	268474	cellular organisms, Eukaryota, Opisthokonta, Metazoa, Eumetazoa, Bilateria, Protostomia, Ecdysozoa, Nematoda (roundworms), Enoplea, Dorylaimia, Trichinellida, Trichinellidae, Trichinella, Trichinella papuae	Predicted	1 out of 5	CAUTION: The sequence shown here is derived from an EMBL/GenBank/DDBJ whole genome shotgun (WGS) entry which is preliminary data. {ECO:0000313|EMBL:KRZ65217.1}.	Domain (1); Non-terminal residue (1)	JYDO01000450;				2016-03-16	2017-12-20
A0A0V1M0H3	NZ_ADJX01000020.1:1-918	95.83	48	2	0	64	207	40	87	4e-15	90.5	A0A0V1M0H3	A0A0V1M0H3_9BILA	unreviewed	Uncharacterized protein	T10_3883	Trichinella papuae	87	unreviewed	268474	cellular organisms, Eukaryota, Opisthokonta, Metazoa, Eumetazoa, Bilateria, Protostomia, Ecdysozoa, Nematoda (roundworms), Enoplea, Dorylaimia, Trichinellida, Trichinellidae, Trichinella, Trichinella papuae	Predicted	1 out of 5	CAUTION: The sequence shown here is derived from an EMBL/GenBank/DDBJ whole genome shotgun (WGS) entry which is preliminary data. {ECO:0000313|EMBL:KRZ65216.1}.	Transmembrane (3)	JYDO01000450;				2016-03-16	2017-12-20
A0A0V1PPS8	NZ_LMSY01000003.1:1-574	97.5	120	3	0	154	513	1	120	2e-62	246.1	A0A0V1PPS8	A0A0V1PPS8_9ASCO	unreviewed	Uncharacterized protein	AC631_06000	Debaryomyces fabryi	120	unreviewed	58627	cellular organisms, Eukaryota, Opisthokonta, Fungi, Dikarya, Ascomycota, saccharomyceta, Saccharomycotina (true yeasts), Saccharomycetes, Saccharomycetales (budding yeasts), Debaryomycetaceae, Debaryomyces, Debaryomyces fabryi	Predicted	1 out of 5	CAUTION: The sequence shown here is derived from an EMBL/GenBank/DDBJ whole genome shotgun (WGS) entry which is preliminary data. {ECO:0000313|EMBL:KRZ98240.1}.		LMYN01000435;	XP_015464343.1;			2016-03-16	2017-06-07
A0A0V1PPU3	NZ_CGZQ01000069.1:1-1661	97.58	165	4	0	962	1456	1	165	7e-84	320.1	A0A0V1PPU3	A0A0V1PPU3_9ASCO	unreviewed	Uncharacterized protein (Fragment)	AC631_05981	Debaryomyces fabryi	165	unreviewed	58627	cellular organisms, Eukaryota, Opisthokonta, Fungi, Dikarya, Ascomycota, saccharomyceta, Saccharomycotina (true yeasts), Saccharomycetes, Saccharomycetales (budding yeasts), Debaryomycetaceae, Debaryomyces, Debaryomyces fabryi	Predicted	1 out of 5	CAUTION: The sequence shown here is derived from an EMBL/GenBank/DDBJ whole genome shotgun (WGS) entry which is preliminary data. {ECO:0000313|EMBL:KRZ98259.1}.	Domain (1); Non-terminal residue (1)	LMYN01000399;	XP_015464362.1;			2016-03-16	2018-09-12
A0A146LM53	NZ_LONH01000058.1:2101-5394	99.15	1065	9	0	1	3195	1	1065	0	2126.7	A0A146LM53	A0A146LM53_LYGHE	unreviewed	LINE-1 reverse transcriptase	LIN1_16 g.88752	Lygus hesperus (Western plant bug)	1074	unreviewed	30085	cellular organisms, Eukaryota, Opisthokonta, Metazoa, Eumetazoa, Bilateria, Protostomia, Ecdysozoa, Panarthropoda, Arthropoda, Mandibulata, Pancrustacea, Hexapoda, Insecta, Dicondylia, Pterygota (winged insects), Neoptera, Paraneoptera, Hemiptera, Prosorrhyncha (bugs), Heteroptera (true bugs), Euheteroptera, Neoheteroptera, Panheteroptera, Cimicomorpha, Cimicoidea, Miridae (plant bugs), Mirinae, …	Predicted	1 out of 5		Coiled coil (1); Domain (1)	GDHC01010150;				2016-06-08	2017-11-22
A0A146MCX9	NZ_FWYR01000098.1:64-261	100	30	0	0	198	109	93	122	1e-08	66.2	A0A146MCX9	A0A146MCX9_LYGHE	unreviewed	Uncharacterized protein	g.39275	Lygus hesperus (Western plant bug)	122	unreviewed	30085	cellular organisms, Eukaryota, Opisthokonta, Metazoa, Eumetazoa, Bilateria, Protostomia, Ecdysozoa, Panarthropoda, Arthropoda, Mandibulata, Pancrustacea, Hexapoda, Insecta, Dicondylia, Pterygota (winged insects), Neoptera, Paraneoptera, Hemiptera, Prosorrhyncha (bugs), Heteroptera (true bugs), Euheteroptera, Neoheteroptera, Panheteroptera, Cimicomorpha, Cimicoidea, Miridae (plant bugs), Mirinae, …	Predicted	1 out of 5			GDHC01002033;				2016-06-08	2017-04-12
A0A151K1C1	NZ_CMIB01000060.1:393-583	98.41	63	1	0	1	189	1	63	4e-32	144.4	A0A151K1C1	A0A151K1C1_9HYME	unreviewed	Uncharacterized protein	ALC53_00001	Atta colombica	84	unreviewed	520822	cellular organisms, Eukaryota, Opisthokonta, Metazoa, Eumetazoa, Bilateria, Protostomia, Ecdysozoa, Panarthropoda, Arthropoda, Mandibulata, Pancrustacea, Hexapoda, Insecta, Dicondylia, Pterygota (winged insects), Neoptera, Holometabola, Hymenoptera, Apocrita (wasps, ants and bees), Aculeata, Formicoidea, Formicidae, Myrmicinae, Attini, Atta (leaf cutting ants), Atta colombica	Predicted	1 out of 5	CAUTION: The sequence shown here is derived from an EMBL/GenBank/DDBJ whole genome shotgun (WGS) entry which is preliminary data. {ECO:0000313|EMBL:KYN45443.1}.		LKEW01000555;				2016-06-08	2018-05-23
A0A151UDC0	NZ_AMQR01000150.1:1-157	98.08	52	1	0	1	156	11	62	8e-24	116.7	A0A151UDC0	A0A151UDC0_CAJCA	unreviewed	Uncharacterized protein (Fragment)	KK1_050681	Cajanus cajan (Pigeon pea) (Cajanus indicus)	73	unreviewed	3821	cellular organisms, Eukaryota, Viridiplantae, Streptophyta, Streptophytina, Embryophyta, Tracheophyta, Euphyllophyta, Spermatophyta, Magnoliophyta, Mesangiospermae, eudicotyledons, Gunneridae, Pentapetalae, rosids, fabids, Fabales, Fabaceae, Papilionoideae, 50 kb inversion clade, NPAAA clade, indigoferoid/millettioid clade, Phaseoleae, Cajanus, Cajanus cajan (Pigeon pea) (Cajanus indicus)	Predicted	1 out of 5	CAUTION: The sequence shown here is derived from an EMBL/GenBank/DDBJ whole genome shotgun (WGS) entry which is preliminary data. {ECO:0000313|EMBL:KYP77228.1}.	Non-terminal residue (1)	AGCT01015943;				2016-06-08	2018-10-10
A0A158LH24	NZ_KZ794899.1:444-612	97.96	49	1	0	21	167	1	49	8e-21	106.7	A0A158LH24	A0A158LH24_CHLTH	unreviewed	Uncharacterized protein	ERS095037_01466	Chlamydia trachomatis	115	unreviewed	813	cellular organisms, Bacteria, PVC group, Chlamydiae, Chlamydiia, Chlamydiales, Chlamydiaceae, Chlamydia/Chlamydophila group, Chlamydia, Chlamydia trachomatis	Predicted	1 out of 5			CVNY01000272;				2016-06-08	2017-08-30
A0A162CX31	NZ_CIEA01000093.1:3049-3263	96.97	33	1	0	33	131	1	33	7e-15	87	A0A162CX31	A0A162CX31_9CRUS	unreviewed	Putative Facilitated trehalose transporter Tret1	APZ42_003302	Daphnia magna	71	unreviewed	35525	cellular organisms, Eukaryota, Opisthokonta, Metazoa, Eumetazoa, Bilateria, Protostomia, Ecdysozoa, Panarthropoda, Arthropoda, Mandibulata, Pancrustacea, Crustacea, Branchiopoda, Phyllopoda, Diplostraca, Cladocera (water fleas), Anomopoda, Daphniidae, Daphnia (common water fleas), Daphnia magna	Predicted	1 out of 5	CAUTION: The sequence shown here is derived from an EMBL/GenBank/DDBJ whole genome shotgun (WGS) entry which is preliminary data. {ECO:0000313|EMBL:KZS00394.1}.		LRGB01010215;				2016-07-06	2018-06-20
A0A183HN86	NZ_NQQK01000030.1:155-386	98.68	76	1	0	3	230	42	162	5e-27	127.5	A0A183HN86	A0A183HN86_9BILA	unreviewed	Uncharacterized protein		Onchocerca flexuosa	303	unreviewed	387005	cellular organisms, Eukaryota, Opisthokonta, Metazoa, Eumetazoa, Bilateria, Protostomia, Ecdysozoa, Nematoda (roundworms), Chromadorea, Spirurida, Spiruromorpha, Filarioidea, Onchocercidae, Onchocerca, Onchocerca flexuosa	Predicted	1 out of 5							2016-09-07	2018-02-28
A0A183HN87	NZ_KZ794899.1:444-612	95.92	49	2	0	21	167	1	49	4e-20	104.4	A0A183HN87	A0A183HN87_9BILA	unreviewed	Uncharacterized protein		Onchocerca flexuosa	115	unreviewed	387005	cellular organisms, Eukaryota, Opisthokonta, Metazoa, Eumetazoa, Bilateria, Protostomia, Ecdysozoa, Nematoda (roundworms), Chromadorea, Spirurida, Spiruromorpha, Filarioidea, Onchocercidae, Onchocerca, Onchocerca flexuosa	Predicted	1 out of 5							2016-09-07	2018-02-28
A0A197SFB4	NZ_KZ794899.1:444-612	97.44	39	1	0	51	167	1	39	2e-14	85.5	A0A197SFB4	A0A197SFB4_MYCLR	unreviewed	Uncharacterized protein	A8144_14165	Mycobacterium leprae 3125609	105	unreviewed	1297123	cellular organisms, Bacteria, Terrabacteria group, Actinobacteria, Actinobacteria (high G+C Gram-positive bacteria), Corynebacteriales, Mycobacteriaceae, Mycobacterium, Mycobacterium leprae, Mycobacterium leprae 3125609	Predicted	1 out of 5	CAUTION: The sequence shown here is derived from an EMBL/GenBank/DDBJ whole genome shotgun (WGS) entry which is preliminary data. {ECO:0000313|EMBL:OAR21588.1}.		LYPH01000008;	WP_050232143.1;			2016-10-05	2018-06-20
A0A1A0KWL1	NZ_LZSC01000001.1:2017-5310	99.89	931	1	0	502	3294	1	931	0	1875.9	A0A1A0KWL1	A0A1A0KWL1_9MYCO	unreviewed	Endonuclease	A5647_00010	Mycobacterium sp. 1100029.7	1108	unreviewed	1834067	cellular organisms, Bacteria, Terrabacteria group, Actinobacteria, Actinobacteria (high G+C Gram-positive bacteria), Corynebacteriales, Mycobacteriaceae, Mycobacterium, Mycobacterium sp. 1100029.7	Predicted	1 out of 5	CAUTION: The sequence shown here is derived from an EMBL/GenBank/DDBJ whole genome shotgun (WGS) entry which is preliminary data. {ECO:0000313|EMBL:OBA65061.1}.	Coiled coil (1); Domain (1)	LZSC01000001;				2016-10-05	2018-03-28
A0A1A0LTH1	NZ_LZSE01000010.1:1742-5035	99.89	931	1	0	502	3294	1	931	0	1877.4	A0A1A0LTH1	A0A1A0LTH1_9MYCO	unreviewed	Endonuclease	A5641_21845	Mycobacterium sp. 1554424.7	1108	unreviewed	1834082	cellular organisms, Bacteria, Terrabacteria group, Actinobacteria, Actinobacteria (high G+C Gram-positive bacteria), Corynebacteriales, Mycobacteriaceae, Mycobacterium, Mycobacterium sp. 1554424.7	Predicted	1 out of 5	CAUTION: The sequence shown here is derived from an EMBL/GenBank/DDBJ whole genome shotgun (WGS) entry which is preliminary data. {ECO:0000313|EMBL:OBA76484.1}.	Coiled coil (1); Domain (1)	LZSE01000010;				2016-10-05	2017-11-22
A0A1A0NAG1	NZ_LZSH01000356.1:854-4147	99.89	931	1	0	2793	1	1	931	0	1876.3	A0A1A0NAG1	A0A1A0NAG1_9MYCO	unreviewed	Endonuclease	A5662_01645	Mycobacterium sp. 1482268.1	1108	unreviewed	1834080	cellular organisms, Bacteria, Terrabacteria group, Actinobacteria, Actinobacteria (high G+C Gram-positive bacteria), Corynebacteriales, Mycobacteriaceae, Mycobacterium, Mycobacterium sp. 1482268.1	Predicted	1 out of 5	CAUTION: The sequence shown here is derived from an EMBL/GenBank/DDBJ whole genome shotgun (WGS) entry which is preliminary data. {ECO:0000313|EMBL:OBA94704.1}.	Coiled coil (1); Domain (1)	LZSH01000356;				2016-10-05	2018-09-12
A0A1A7LC15	NZ_JPWZ01000241.1:397-569	100	57	0	0	171	1	15	71	2e-24	118.6	A0A1A7LC15	A0A1A7LC15_9BACL	unreviewed	Uncharacterized protein	A9986_20900	Solibacillus silvestris	82	unreviewed	76853	cellular organisms, Bacteria, Terrabacteria group, Firmicutes, Bacilli, Bacillales, Planococcaceae, Solibacillus, Solibacillus silvestris	Predicted	1 out of 5	CAUTION: The sequence shown here is derived from an EMBL/GenBank/DDBJ whole genome shotgun (WGS) entry which is preliminary data. {ECO:0000313|EMBL:OBW51513.1}.		LZRJ01000116;				2016-10-05	2017-07-05
A0A1A7LLE1	NZ_PYPZ01000701.1:106-267	100	53	0	0	2	160	60	112	3e-21	108.2	A0A1A7LLE1	A0A1A7LLE1_9BACL	unreviewed	Uncharacterized protein (Fragment)	A9986_20705	Solibacillus silvestris	115	unreviewed	76853	cellular organisms, Bacteria, Terrabacteria group, Firmicutes, Bacilli, Bacillales, Planococcaceae, Solibacillus, Solibacillus silvestris	Predicted	1 out of 5	CAUTION: The sequence shown here is derived from an EMBL/GenBank/DDBJ whole genome shotgun (WGS) entry which is preliminary data. {ECO:0000313|EMBL:OBW54599.1}.	Non-terminal residue (1)	LZRJ01000091;	WP_065217437.1;			2016-10-05	2017-06-07
A0A1A7LMV5	NZ_QLYV01000095.1:1371-1536	100	55	0	0	2	166	47	114	5e-20	104	A0A1A7LMV5	A0A1A7LMV5_9BACL	unreviewed	Uncharacterized protein	A9986_20640	Solibacillus silvestris	132	unreviewed	76853	cellular organisms, Bacteria, Terrabacteria group, Firmicutes, Bacilli, Bacillales, Planococcaceae, Solibacillus, Solibacillus silvestris	Predicted	1 out of 5	CAUTION: The sequence shown here is derived from an EMBL/GenBank/DDBJ whole genome shotgun (WGS) entry which is preliminary data. {ECO:0000313|EMBL:OBW55747.1}.	Sequence uncertainty (1)	LZRJ01000080;	WP_065217202.1;			2016-10-05	2017-06-07
A0A1A7LQU7	NZ_APIF01000029.1:1-518	99.19	124	1	0	107	478	1	124	2e-54	218.8	A0A1A7LQU7	A0A1A7LQU7_9BACL	unreviewed	Uncharacterized protein	A9986_20555	Solibacillus silvestris	124	unreviewed	76853	cellular organisms, Bacteria, Terrabacteria group, Firmicutes, Bacilli, Bacillales, Planococcaceae, Solibacillus, Solibacillus silvestris	Predicted	1 out of 5	CAUTION: The sequence shown here is derived from an EMBL/GenBank/DDBJ whole genome shotgun (WGS) entry which is preliminary data. {ECO:0000313|EMBL:OBW56368.1}.	Domain (1)	LZRJ01000070;				2016-10-05	2018-09-12
A0A1A7LZH7	NZ_LZRJ01000010.1:195-411	100	69	0	0	8	214	1	69	9e-32	143.3	A0A1A7LZH7	A0A1A7LZH7_9BACL	unreviewed	Uncharacterized protein	A9986_21070	Solibacillus silvestris	87	unreviewed	76853	cellular organisms, Bacteria, Terrabacteria group, Firmicutes, Bacilli, Bacillales, Planococcaceae, Solibacillus, Solibacillus silvestris	Predicted	1 out of 5	CAUTION: The sequence shown here is derived from an EMBL/GenBank/DDBJ whole genome shotgun (WGS) entry which is preliminary data. {ECO:0000313|EMBL:OBW59448.1}.		LZRJ01000010;	WP_065216147.1;			2016-10-05	2017-06-07
A0A1A9A3T5	NZ_BCMN01000064.1:1840-2159	100	58	0	0	33	206	634	691	2e-27	128.6	A0A1A9A3T5	A0A1A9A3T5_9APIC	unreviewed	Cytochrome oxidase subunit 1 (COX1)	POVWA1_062070	Plasmodium ovale wallikeri	691	unreviewed	864142	cellular organisms, Eukaryota, Alveolata, Apicomplexa, Aconoidasida, Haemosporida (haemosporidians), Plasmodiidae, Plasmodium, Plasmodium (Plasmodium), Plasmodium ovale (malaria parasite P. ovale), Plasmodium ovale wallikeri	Predicted	1 out of 5		Domain (2); Transmembrane (15)	FLRD01000165;				2016-10-05	2018-05-23
A0A1A9A488	NZ_AMRJ01000089.1:288-454	100	44	0	0	1	132	41	84	8e-18	96.7	A0A1A9A488	A0A1A9A488_9APIC	unreviewed	Uncharacterized protein	POVWA1_062150 POVWA2_077120	Plasmodium ovale wallikeri	84	unreviewed	864142	cellular organisms, Eukaryota, Alveolata, Apicomplexa, Aconoidasida, Haemosporida (haemosporidians), Plasmodiidae, Plasmodium, Plasmodium (Plasmodium), Plasmodium ovale (malaria parasite P. ovale), Plasmodium ovale wallikeri	Predicted	1 out of 5			FLRD01000172;FLRE01001710;				2016-10-05	2017-06-07
A0A1A9A5E5	NZ_CKYY01000039.1:2280-2446	95.92	49	2	0	10	156	1	49	2e-20	105.5	A0A1A9A5E5	A0A1A9A5E5_9APIC	unreviewed	STP1 protein	POVWA2_062070	Plasmodium ovale wallikeri	926	unreviewed	864142	cellular organisms, Eukaryota, Alveolata, Apicomplexa, Aconoidasida, Haemosporida (haemosporidians), Plasmodiidae, Plasmodium, Plasmodium (Plasmodium), Plasmodium ovale (malaria parasite P. ovale), Plasmodium ovale wallikeri	Predicted	1 out of 5		Domain (1); Transmembrane (1)	FLRE01000229;				2016-10-05	2017-06-07
A0A1A9A835	NZ_BCMN01000082.1:638-808	97.22	36	1	0	1	108	5	40	2e-12	79	A0A1A9A835	A0A1A9A835_9APIC	unreviewed	Rhoptry-associated membrane antigen, putative (RAMA)	POVWA2_063270	Plasmodium ovale wallikeri	736	unreviewed	864142	cellular organisms, Eukaryota, Alveolata, Apicomplexa, Aconoidasida, Haemosporida (haemosporidians), Plasmodiidae, Plasmodium, Plasmodium (Plasmodium), Plasmodium ovale (malaria parasite P. ovale), Plasmodium ovale wallikeri	Predicted	1 out of 5			FLRE01000297;				2016-10-05	2017-06-07
A0A1A9A890	NZ_LZSC01000066.1:131-306	97.67	43	1	0	1	129	358	425	2e-09	68.9	A0A1A9A890	A0A1A9A890_9APIC	unreviewed	PIR Superfamily Protein	POVWA2_063330	Plasmodium ovale wallikeri	427	unreviewed	864142	cellular organisms, Eukaryota, Alveolata, Apicomplexa, Aconoidasida, Haemosporida (haemosporidians), Plasmodiidae, Plasmodium, Plasmodium (Plasmodium), Plasmodium ovale (malaria parasite P. ovale), Plasmodium ovale wallikeri	Predicted	1 out of 5		Coiled coil (1)	FLRE01000301;				2016-10-05	2017-12-20
A0A1A9A9V6	NZ_PGJS01001139.1:312-409	100	32	0	0	3	98	82	113	1e-08	66.2	A0A1A9A9V6	A0A1A9A9V6_9APIC	unreviewed	Uncharacterized protein	POVWA2_063790	Plasmodium ovale wallikeri	140	unreviewed	864142	cellular organisms, Eukaryota, Alveolata, Apicomplexa, Aconoidasida, Haemosporida (haemosporidians), Plasmodiidae, Plasmodium, Plasmodium (Plasmodium), Plasmodium ovale (malaria parasite P. ovale), Plasmodium ovale wallikeri	Predicted	1 out of 5			FLRE01000336;				2016-10-05	2017-06-07
A0A1A9AAC9	NZ_CQSC01000338.1:95-262	97.56	41	1	0	46	168	7	47	3e-14	84.7	A0A1A9AAC9	A0A1A9AAC9_9APIC	unreviewed	Uncharacterized protein	POVWA2_063920	Plasmodium ovale wallikeri	221	unreviewed	864142	cellular organisms, Eukaryota, Alveolata, Apicomplexa, Aconoidasida, Haemosporida (haemosporidians), Plasmodiidae, Plasmodium, Plasmodium (Plasmodium), Plasmodium ovale (malaria parasite P. ovale), Plasmodium ovale wallikeri	Predicted	1 out of 5			FLRE01000364;				2016-10-05	2017-06-07
A0A1A9ABL6	NZ_CIEA01000134.1:156-321	100	40	0	0	1	120	218	257	2e-16	92	A0A1A9ABL6	A0A1A9ABL6_9APIC	unreviewed	PIR Superfamily Protein	POVWA1_064690	Plasmodium ovale wallikeri	316	unreviewed	864142	cellular organisms, Eukaryota, Alveolata, Apicomplexa, Aconoidasida, Haemosporida (haemosporidians), Plasmodiidae, Plasmodium, Plasmodium (Plasmodium), Plasmodium ovale (malaria parasite P. ovale), Plasmodium ovale wallikeri	Predicted	1 out of 5			FLRD01000397;				2016-10-05	2017-06-07
A0A1A9ACK0	NZ_AMRJ01000070.1:847-1017	95.45	44	2	0	1	132	197	240	8e-15	86.7	A0A1A9ACK0	A0A1A9ACK0_9APIC	unreviewed	STP1 protein	POVWA2_064760	Plasmodium ovale wallikeri	240	unreviewed	864142	cellular organisms, Eukaryota, Alveolata, Apicomplexa, Aconoidasida, Haemosporida (haemosporidians), Plasmodiidae, Plasmodium, Plasmodium (Plasmodium), Plasmodium ovale (malaria parasite P. ovale), Plasmodium ovale wallikeri	Predicted	1 out of 5		Domain (1)	FLRE01000478;				2016-10-05	2017-06-07
A0A1A9ACZ5	NZ_CGZQ01000069.1:1-1661	98.67	75	1	0	395	171	1	75	2e-35	159.5	A0A1A9ACZ5	A0A1A9ACZ5_9APIC	unreviewed	Uncharacterized protein	POVWA2_064990	Plasmodium ovale wallikeri	94	unreviewed	864142	cellular organisms, Eukaryota, Alveolata, Apicomplexa, Aconoidasida, Haemosporida (haemosporidians), Plasmodiidae, Plasmodium, Plasmodium (Plasmodium), Plasmodium ovale (malaria parasite P. ovale), Plasmodium ovale wallikeri	Predicted	1 out of 5		Chain (1); Signal peptide (1)	FLRE01000498;				2016-10-05	2018-02-28
A0A1A9AD75	NZ_FVQV01000053.1:1-121	100	40	0	0	1	120	404	443	7e-14	83.6	A0A1A9AD75	A0A1A9AD75_9APIC	unreviewed	PIR Superfamily Protein	POVWA2_065150	Plasmodium ovale wallikeri	464	unreviewed	864142	cellular organisms, Eukaryota, Alveolata, Apicomplexa, Aconoidasida, Haemosporida (haemosporidians), Plasmodiidae, Plasmodium, Plasmodium (Plasmodium), Plasmodium ovale (malaria parasite P. ovale), Plasmodium ovale wallikeri	Predicted	1 out of 5		Transmembrane (1)	FLRE01000511;				2016-10-05	2017-06-07
A0A1A9ADM2	NZ_CGZQ01000103.1:80-246	100	53	0	0	1	159	66	118	6e-24	117.1	A0A1A9ADM2	A0A1A9ADM2_9APIC	unreviewed	Uncharacterized protein	POVWA1_066090	Plasmodium ovale wallikeri	118	unreviewed	864142	cellular organisms, Eukaryota, Alveolata, Apicomplexa, Aconoidasida, Haemosporida (haemosporidians), Plasmodiidae, Plasmodium, Plasmodium (Plasmodium), Plasmodium ovale (malaria parasite P. ovale), Plasmodium ovale wallikeri	Predicted	1 out of 5			FLRD01000477;				2016-10-05	2017-06-07
A0A1A9ADS1	NZ_CFSM01000137.1:250-419	100	51	0	0	153	1	17	67	7e-20	103.6	A0A1A9ADS1	A0A1A9ADS1_9APIC	unreviewed	Uncharacterized protein	POVWA2_065910	Plasmodium ovale wallikeri	111	unreviewed	864142	cellular organisms, Eukaryota, Alveolata, Apicomplexa, Aconoidasida, Haemosporida (haemosporidians), Plasmodiidae, Plasmodium, Plasmodium (Plasmodium), Plasmodium ovale (malaria parasite P. ovale), Plasmodium ovale wallikeri	Predicted	1 out of 5			FLRE01000631;				2016-10-05	2017-06-07
A0A1A9AEA6	NZ_BFCS01000362.1:81-251	100	57	0	0	1	171	2	58	6e-24	117.1	A0A1A9AEA6	A0A1A9AEA6_9APIC	unreviewed	Uncharacterized protein	POVWA1_067140	Plasmodium ovale wallikeri	92	unreviewed	864142	cellular organisms, Eukaryota, Alveolata, Apicomplexa, Aconoidasida, Haemosporida (haemosporidians), Plasmodiidae, Plasmodium, Plasmodium (Plasmodium), Plasmodium ovale (malaria parasite P. ovale), Plasmodium ovale wallikeri	Predicted	1 out of 5			FLRD01000577;				2016-10-05	2017-06-07
A0A1A9AED0	NZ_CGZQ01000083.1:716-886	100	43	0	0	169	41	123	165	1e-15	89.7	A0A1A9AED0	A0A1A9AED0_9APIC	unreviewed	Uncharacterized protein	POVWA2_065690	Plasmodium ovale wallikeri	165	unreviewed	864142	cellular organisms, Eukaryota, Alveolata, Apicomplexa, Aconoidasida, Haemosporida (haemosporidians), Plasmodiidae, Plasmodium, Plasmodium (Plasmodium), Plasmodium ovale (malaria parasite P. ovale), Plasmodium ovale wallikeri	Predicted	1 out of 5			FLRE01000601;				2016-10-05	2017-06-07
A0A1A9AF84	NZ_BCMN01000082.1:638-808	100	57	0	0	171	1	123	179	1e-23	116.3	A0A1A9AF84	A0A1A9AF84_9APIC	unreviewed	STP1 protein	POVWA2_066000	Plasmodium ovale wallikeri	753	unreviewed	864142	cellular organisms, Eukaryota, Alveolata, Apicomplexa, Aconoidasida, Haemosporida (haemosporidians), Plasmodiidae, Plasmodium, Plasmodium (Plasmodium), Plasmodium ovale (malaria parasite P. ovale), Plasmodium ovale wallikeri	Predicted	1 out of 5		Coiled coil (2); Domain (1); Transmembrane (1)	FLRE01000654;				2016-10-05	2017-12-20
A0A1A9AF88	NZ_CGZQ01000072.1:543-712	97.62	42	1	0	170	45	2	43	1e-14	86.3	A0A1A9AF88	A0A1A9AF88_9APIC	unreviewed	PIR Superfamily Protein	POVWA2_066060	Plasmodium ovale wallikeri	1199	unreviewed	864142	cellular organisms, Eukaryota, Alveolata, Apicomplexa, Aconoidasida, Haemosporida (haemosporidians), Plasmodiidae, Plasmodium, Plasmodium (Plasmodium), Plasmodium ovale (malaria parasite P. ovale), Plasmodium ovale wallikeri	Predicted	1 out of 5		Coiled coil (1); Domain (1)	FLRE01000662;				2016-10-05	2017-06-07
A0A1A9AG26	NZ_CGZQ01000103.1:80-246	98.11	53	1	0	1	159	22	74	3e-23	114.8	A0A1A9AG26	A0A1A9AG26_9APIC	unreviewed	Uncharacterized protein	POVWA2_068290	Plasmodium ovale wallikeri	74	unreviewed	864142	cellular organisms, Eukaryota, Alveolata, Apicomplexa, Aconoidasida, Haemosporida (haemosporidians), Plasmodiidae, Plasmodium, Plasmodium (Plasmodium), Plasmodium ovale (malaria parasite P. ovale), Plasmodium ovale wallikeri	Predicted	1 out of 5			FLRE01000917;				2016-10-05	2017-06-07
A0A1A9AG31	NZ_BFCS01000362.1:81-251	96.49	57	2	0	1	171	47	103	4e-22	110.9	A0A1A9AG31	A0A1A9AG31_9APIC	unreviewed	Uncharacterized protein	POVWA2_068320	Plasmodium ovale wallikeri	137	unreviewed	864142	cellular organisms, Eukaryota, Alveolata, Apicomplexa, Aconoidasida, Haemosporida (haemosporidians), Plasmodiidae, Plasmodium, Plasmodium (Plasmodium), Plasmodium ovale (malaria parasite P. ovale), Plasmodium ovale wallikeri	Predicted	1 out of 5			FLRE01000920;				2016-10-05	2017-06-07
A0A1A9AG91	NZ_BFCK01000856.1:169-335	95.12	41	2	0	165	43	32	72	3e-12	78.2	A0A1A9AG91	A0A1A9AG91_9APIC	unreviewed	Liver stage antigen 3	POVWA2_068610	Plasmodium ovale wallikeri	2139	unreviewed	864142	cellular organisms, Eukaryota, Alveolata, Apicomplexa, Aconoidasida, Haemosporida (haemosporidians), Plasmodiidae, Plasmodium, Plasmodium (Plasmodium), Plasmodium ovale (malaria parasite P. ovale), Plasmodium ovale wallikeri	Predicted	1 out of 5		Coiled coil (10); Transmembrane (1)	FLRE01000965;				2016-10-05	2017-12-20
A0A1A9AGG5	NZ_PYPV01000342.1:1-145	97.37	38	1	0	117	4	92	129	3e-12	78.2	A0A1A9AGG5	A0A1A9AGG5_9APIC	unreviewed	Uncharacterized protein	POVWA2_067180	Plasmodium ovale wallikeri	129	unreviewed	864142	cellular organisms, Eukaryota, Alveolata, Apicomplexa, Aconoidasida, Haemosporida (haemosporidians), Plasmodiidae, Plasmodium, Plasmodium (Plasmodium), Plasmodium ovale (malaria parasite P. ovale), Plasmodium ovale wallikeri	Predicted	1 out of 5			FLRE01000771;				2016-10-05	2017-06-07
A0A1A9AGJ3	NZ_BFCS01000362.1:81-251	100	52	0	0	1	156	81	132	4e-21	107.8	A0A1A9AGJ3	A0A1A9AGJ3_9APIC	unreviewed	Uncharacterized protein	POVWA2_067200	Plasmodium ovale wallikeri	132	unreviewed	864142	cellular organisms, Eukaryota, Alveolata, Apicomplexa, Aconoidasida, Haemosporida (haemosporidians), Plasmodiidae, Plasmodium, Plasmodium (Plasmodium), Plasmodium ovale (malaria parasite P. ovale), Plasmodium ovale wallikeri	Predicted	1 out of 5			FLRE01000773;				2016-10-05	2017-06-07
A0A1A9AGR8	NZ_AMRJ01000070.1:1189-1359	95.45	44	2	0	1	132	346	389	1e-15	89.7	A0A1A9AGR8	A0A1A9AGR8_9APIC	unreviewed	PIR Superfamily Protein	POVWA2_067410	Plasmodium ovale wallikeri	389	unreviewed	864142	cellular organisms, Eukaryota, Alveolata, Apicomplexa, Aconoidasida, Haemosporida (haemosporidians), Plasmodiidae, Plasmodium, Plasmodium (Plasmodium), Plasmodium ovale (malaria parasite P. ovale), Plasmodium ovale wallikeri	Predicted	1 out of 5			FLRE01000804;				2016-10-05	2017-06-07
A0A1A9AGW4	NZ_CMKS01000057.1:2442-2612	100	57	0	0	171	1	2	58	2e-24	119	A0A1A9AGW4	A0A1A9AGW4_9APIC	unreviewed	Uncharacterized protein	POVWA2_067450	Plasmodium ovale wallikeri	103	unreviewed	864142	cellular organisms, Eukaryota, Alveolata, Apicomplexa, Aconoidasida, Haemosporida (haemosporidians), Plasmodiidae, Plasmodium, Plasmodium (Plasmodium), Plasmodium ovale (malaria parasite P. ovale), Plasmodium ovale wallikeri	Predicted	1 out of 5			FLRE01000811;				2016-10-05	2017-06-07
A0A1A9AH03	NZ_AAZP01000219.1:551-721	98.11	53	1	0	160	2	25	77	2e-22	111.7	A0A1A9AH03	A0A1A9AH03_9APIC	unreviewed	Uncharacterized protein	POVWA2_067610	Plasmodium ovale wallikeri	120	unreviewed	864142	cellular organisms, Eukaryota, Alveolata, Apicomplexa, Aconoidasida, Haemosporida (haemosporidians), Plasmodiidae, Plasmodium, Plasmodium (Plasmodium), Plasmodium ovale (malaria parasite P. ovale), Plasmodium ovale wallikeri	Predicted	1 out of 5			FLRE01000836;				2016-10-05	2017-06-07
A0A1A9AH29	NZ_CMKS01000111.1:5-175	97.37	38	1	0	115	2	1	38	4e-12	77.8	A0A1A9AH29	A0A1A9AH29_9APIC	unreviewed	Uncharacterized protein	POVWA2_068220	Plasmodium ovale wallikeri	82	unreviewed	864142	cellular organisms, Eukaryota, Alveolata, Apicomplexa, Aconoidasida, Haemosporida (haemosporidians), Plasmodiidae, Plasmodium, Plasmodium (Plasmodium), Plasmodium ovale (malaria parasite P. ovale), Plasmodium ovale wallikeri	Predicted	1 out of 5			FLRE01000912;				2016-10-05	2017-06-07
A0A1A9AH47	NZ_CIEA01000093.1:3049-3263	96.97	33	1	0	33	131	1	33	6e-15	87.4	A0A1A9AH47	A0A1A9AH47_9APIC	unreviewed	28 kDa ookinete surface protein (P28)	POVWA2_068380	Plasmodium ovale wallikeri	282	unreviewed	864142	cellular organisms, Eukaryota, Alveolata, Apicomplexa, Aconoidasida, Haemosporida (haemosporidians), Plasmodiidae, Plasmodium, Plasmodium (Plasmodium), Plasmodium ovale (malaria parasite P. ovale), Plasmodium ovale wallikeri	Predicted	1 out of 5		Domain (3); Transmembrane (1)	FLRE01000927;				2016-10-05	2017-06-07
A0A1A9AH56	NZ_CGZQ01000062.1:281-451	100	42	0	0	126	1	27	68	3e-16	91.7	A0A1A9AH56	A0A1A9AH56_9APIC	unreviewed	STP1 protein	POVWA1_070310	Plasmodium ovale wallikeri	716	unreviewed	864142	cellular organisms, Eukaryota, Alveolata, Apicomplexa, Aconoidasida, Haemosporida (haemosporidians), Plasmodiidae, Plasmodium, Plasmodium (Plasmodium), Plasmodium ovale (malaria parasite P. ovale), Plasmodium ovale wallikeri	Predicted	1 out of 5		Coiled coil (1); Domain (1); Transmembrane (1)	FLRD01000713;				2016-10-05	2017-12-20
A0A1A9AH72	NZ_NRTK01000065.1:567-737	95.35	43	2	0	1	129	2	44	8e-15	86.7	A0A1A9AH72	A0A1A9AH72_9APIC	unreviewed	Uncharacterized protein	POVWA2_068230	Plasmodium ovale wallikeri	131	unreviewed	864142	cellular organisms, Eukaryota, Alveolata, Apicomplexa, Aconoidasida, Haemosporida (haemosporidians), Plasmodiidae, Plasmodium, Plasmodium (Plasmodium), Plasmodium ovale (malaria parasite P. ovale), Plasmodium ovale wallikeri	Predicted	1 out of 5			FLRE01000912;				2016-10-05	2017-06-07
A0A1A9AHB3	NZ_CGZQ01000063.1:693-863	100	57	0	0	171	1	90	146	4e-24	117.5	A0A1A9AHB3	A0A1A9AHB3_9APIC	unreviewed	Uncharacterized protein	POVWA2_068460	Plasmodium ovale wallikeri	151	unreviewed	864142	cellular organisms, Eukaryota, Alveolata, Apicomplexa, Aconoidasida, Haemosporida (haemosporidians), Plasmodiidae, Plasmodium, Plasmodium (Plasmodium), Plasmodium ovale (malaria parasite P. ovale), Plasmodium ovale wallikeri	Predicted	1 out of 5			FLRE01000943;				2016-10-05	2017-06-07
A0A1A9AHC2	NZ_CMKS01000111.1:176-346	100	43	0	0	169	41	139	181	2e-15	89	A0A1A9AHC2	A0A1A9AHC2_9APIC	unreviewed	Uncharacterized protein	POVWA2_068210	Plasmodium ovale wallikeri	181	unreviewed	864142	cellular organisms, Eukaryota, Alveolata, Apicomplexa, Aconoidasida, Haemosporida (haemosporidians), Plasmodiidae, Plasmodium, Plasmodium (Plasmodium), Plasmodium ovale (malaria parasite P. ovale), Plasmodium ovale wallikeri	Predicted	1 out of 5			FLRE01000912;				2016-10-05	2017-06-07
A0A1A9AHP4	NZ_CKYY01000049.1:1297-1462	100	42	0	0	3	128	38	79	2e-15	88.6	A0A1A9AHP4	A0A1A9AHP4_9APIC	unreviewed	Uncharacterized protein	POVWA2_068940	Plasmodium ovale wallikeri	79	unreviewed	864142	cellular organisms, Eukaryota, Alveolata, Apicomplexa, Aconoidasida, Haemosporida (haemosporidians), Plasmodiidae, Plasmodium, Plasmodium (Plasmodium), Plasmodium ovale (malaria parasite P. ovale), Plasmodium ovale wallikeri	Predicted	1 out of 5			FLRE01000974;				2016-10-05	2017-06-07
A0A1A9AHQ1	NZ_CFSM01000135.1:355-521	100	42	0	0	165	40	38	79	9e-15	86.7	A0A1A9AHQ1	A0A1A9AHQ1_9APIC	unreviewed	Uncharacterized protein	POVWA1_071590	Plasmodium ovale wallikeri	79	unreviewed	864142	cellular organisms, Eukaryota, Alveolata, Apicomplexa, Aconoidasida, Haemosporida (haemosporidians), Plasmodiidae, Plasmodium, Plasmodium (Plasmodium), Plasmodium ovale (malaria parasite P. ovale), Plasmodium ovale wallikeri	Predicted	1 out of 5			FLRD01000816;				2016-10-05	2017-06-07
A0A1A9AHQ6	NZ_QKVY01000002.1:393-564	100	43	0	0	1	129	339	381	2e-18	98.6	A0A1A9AHQ6	A0A1A9AHQ6_9APIC	unreviewed	PIR Superfamily Protein	POVWA2_069310	Plasmodium ovale wallikeri	392	unreviewed	864142	cellular organisms, Eukaryota, Alveolata, Apicomplexa, Aconoidasida, Haemosporida (haemosporidians), Plasmodiidae, Plasmodium, Plasmodium (Plasmodium), Plasmodium ovale (malaria parasite P. ovale), Plasmodium ovale wallikeri	Predicted	1 out of 5		Transmembrane (1)	FLRE01001026;				2016-10-05	2017-06-07
A0A1A9AHR8	NZ_CGZQ01000100.1:191-361	100	44	0	0	1	132	100	143	8e-18	96.7	A0A1A9AHR8	A0A1A9AHR8_9APIC	unreviewed	Uncharacterized protein	POVWA1_071660	Plasmodium ovale wallikeri	143	unreviewed	864142	cellular organisms, Eukaryota, Alveolata, Apicomplexa, Aconoidasida, Haemosporida (haemosporidians), Plasmodiidae, Plasmodium, Plasmodium (Plasmodium), Plasmodium ovale (malaria parasite P. ovale), Plasmodium ovale wallikeri	Predicted	1 out of 5			FLRD01000824;				2016-10-05	2017-06-07
A0A1A9AHW0	NZ_CMKS01000075.1:525-691	100	41	0	0	3	125	38	78	5e-15	87.4	A0A1A9AHW0	A0A1A9AHW0_9APIC	unreviewed	Uncharacterized protein	POVWA1_071600	Plasmodium ovale wallikeri	137	unreviewed	864142	cellular organisms, Eukaryota, Alveolata, Apicomplexa, Aconoidasida, Haemosporida (haemosporidians), Plasmodiidae, Plasmodium, Plasmodium (Plasmodium), Plasmodium ovale (malaria parasite P. ovale), Plasmodium ovale wallikeri	Predicted	1 out of 5			FLRD01000816;				2016-10-05	2017-06-07
A0A1A9AI04	NZ_CGZQ01000067.1:1503-1673	100	36	0	0	63	170	1	36	1e-12	79.7	A0A1A9AI04	A0A1A9AI04_9APIC	unreviewed	Uncharacterized protein	POVWA2_069870	Plasmodium ovale wallikeri	79	unreviewed	864142	cellular organisms, Eukaryota, Alveolata, Apicomplexa, Aconoidasida, Haemosporida (haemosporidians), Plasmodiidae, Plasmodium, Plasmodium (Plasmodium), Plasmodium ovale (malaria parasite P. ovale), Plasmodium ovale wallikeri	Predicted	1 out of 5			FLRE01001093;				2016-10-05	2017-06-07
A0A1A9AI41	NZ_BCMN01000094.1:68-238	100	35	0	0	57	161	66	100	8e-10	70.1	A0A1A9AI41	A0A1A9AI41_9APIC	unreviewed	Uncharacterized protein	POVWA2_070100	Plasmodium ovale wallikeri	100	unreviewed	864142	cellular organisms, Eukaryota, Alveolata, Apicomplexa, Aconoidasida, Haemosporida (haemosporidians), Plasmodiidae, Plasmodium, Plasmodium (Plasmodium), Plasmodium ovale (malaria parasite P. ovale), Plasmodium ovale wallikeri	Predicted	1 out of 5			FLRE01001119;				2016-10-05	2017-06-07
A0A1A9AI54	NZ_LCSI01000029.1:794-954	98	50	1	0	151	2	315	389	4e-15	87.8	A0A1A9AI54	A0A1A9AI54_9APIC	unreviewed	Nucleoporin NUP100/NSP100, putative (NUP100)	POVWA2_069840	Plasmodium ovale wallikeri	421	unreviewed	864142	cellular organisms, Eukaryota, Alveolata, Apicomplexa, Aconoidasida, Haemosporida (haemosporidians), Plasmodiidae, Plasmodium, Plasmodium (Plasmodium), Plasmodium ovale (malaria parasite P. ovale), Plasmodium ovale wallikeri	Predicted	1 out of 5			FLRE01001088;				2016-10-05	2017-06-07
A0A1A9AIP1	NZ_CGZQ01000063.1:693-863	100	57	0	0	171	1	272	328	4e-24	117.5	A0A1A9AIP1	A0A1A9AIP1_9APIC	unreviewed	Uncharacterized protein	POVWA1_073990	Plasmodium ovale wallikeri	333	unreviewed	864142	cellular organisms, Eukaryota, Alveolata, Apicomplexa, Aconoidasida, Haemosporida (haemosporidians), Plasmodiidae, Plasmodium, Plasmodium (Plasmodium), Plasmodium ovale (malaria parasite P. ovale), Plasmodium ovale wallikeri	Predicted	1 out of 5			FLRD01000983;				2016-10-05	2017-06-07
A0A1A9AIP9	NZ_PYPZ01000125.1:278-414	96.97	33	1	0	101	3	8	40	1e-10	73.2	A0A1A9AIP9	A0A1A9AIP9_9APIC	unreviewed	PIR Superfamily Protein	POVWA2_070840	Plasmodium ovale wallikeri	383	unreviewed	864142	cellular organisms, Eukaryota, Alveolata, Apicomplexa, Aconoidasida, Haemosporida (haemosporidians), Plasmodiidae, Plasmodium, Plasmodium (Plasmodium), Plasmodium ovale (malaria parasite P. ovale), Plasmodium ovale wallikeri	Predicted	1 out of 5		Transmembrane (1)	FLRE01001206;				2016-10-05	2017-06-07
A0A1A9AIT9	NZ_BFCS01000362.1:81-251	100	57	0	0	1	171	49	105	6e-24	117.1	A0A1A9AIT9	A0A1A9AIT9_9APIC	unreviewed	Uncharacterized protein	POVWA2_071070	Plasmodium ovale wallikeri	139	unreviewed	864142	cellular organisms, Eukaryota, Alveolata, Apicomplexa, Aconoidasida, Haemosporida (haemosporidians), Plasmodiidae, Plasmodium, Plasmodium (Plasmodium), Plasmodium ovale (malaria parasite P. ovale), Plasmodium ovale wallikeri	Predicted	1 out of 5			FLRE01001228;				2016-10-05	2017-06-07
A0A1A9AJJ5	NZ_BCMN01000082.1:638-808	96.49	57	2	0	171	1	2	58	2e-21	108.6	A0A1A9AJJ5	A0A1A9AJJ5_9APIC	unreviewed	Uncharacterized protein	POVWA2_073140	Plasmodium ovale wallikeri	132	unreviewed	864142	cellular organisms, Eukaryota, Alveolata, Apicomplexa, Aconoidasida, Haemosporida (haemosporidians), Plasmodiidae, Plasmodium, Plasmodium (Plasmodium), Plasmodium ovale (malaria parasite P. ovale), Plasmodium ovale wallikeri	Predicted	1 out of 5			FLRE01001344;				2016-10-05	2017-06-07
A0A1A9AJP7	NZ_BFCU01000308.1:114-251	97.78	45	1	0	2	136	19	63	2e-18	98.6	A0A1A9AJP7	A0A1A9AJP7_9APIC	unreviewed	Uncharacterized protein	POVWA1_075850	Plasmodium ovale wallikeri	117	unreviewed	864142	cellular organisms, Eukaryota, Alveolata, Apicomplexa, Aconoidasida, Haemosporida (haemosporidians), Plasmodiidae, Plasmodium, Plasmodium (Plasmodium), Plasmodium ovale (malaria parasite P. ovale), Plasmodium ovale wallikeri	Predicted	1 out of 5			FLRD01001085;				2016-10-05	2017-06-07
A0A1A9AJZ8	NZ_BFCK01000714.1:53-189	96.97	33	1	0	101	3	862	894	4e-11	74.3	A0A1A9AJZ8	A0A1A9AJZ8_9APIC	unreviewed	STP1 protein	POVWA2_073880	Plasmodium ovale wallikeri	928	unreviewed	864142	cellular organisms, Eukaryota, Alveolata, Apicomplexa, Aconoidasida, Haemosporida (haemosporidians), Plasmodiidae, Plasmodium, Plasmodium (Plasmodium), Plasmodium ovale (malaria parasite P. ovale), Plasmodium ovale wallikeri	Predicted	1 out of 5		Coiled coil (1); Domain (1); Transmembrane (1)	FLRE01001402;				2016-10-05	2017-06-07
A0A1A9AK13	NZ_CGZQ01000144.1:144-308	100	39	0	0	119	3	285	323	9e-14	83.2	A0A1A9AK13	A0A1A9AK13_9APIC	unreviewed	PIR Superfamily Protein	POVWA2_073480	Plasmodium ovale wallikeri	391	unreviewed	864142	cellular organisms, Eukaryota, Alveolata, Apicomplexa, Aconoidasida, Haemosporida (haemosporidians), Plasmodiidae, Plasmodium, Plasmodium (Plasmodium), Plasmodium ovale (malaria parasite P. ovale), Plasmodium ovale wallikeri	Predicted	1 out of 5			FLRE01001379;				2016-10-05	2017-06-07
A0A1A9AK27	NZ_AMRJ01000070.1:847-1017	97.73	44	1	0	1	132	127	170	3e-16	91.3	A0A1A9AK27	A0A1A9AK27_9APIC	unreviewed	Uncharacterized protein	POVWA2_074290	Plasmodium ovale wallikeri	170	unreviewed	864142	cellular organisms, Eukaryota, Alveolata, Apicomplexa, Aconoidasida, Haemosporida (haemosporidians), Plasmodiidae, Plasmodium, Plasmodium (Plasmodium), Plasmodium ovale (malaria parasite P. ovale), Plasmodium ovale wallikeri	Predicted	1 out of 5		Chain (1); Signal peptide (1)	FLRE01001435;				2016-10-05	2017-06-07
A0A1A9AK44	NZ_CGZQ01000083.1:208-378	98.08	52	1	0	169	14	50	101	3e-19	101.3	A0A1A9AK44	A0A1A9AK44_9APIC	unreviewed	Uncharacterized protein	POVWA1_079450	Plasmodium ovale wallikeri	160	unreviewed	864142	cellular organisms, Eukaryota, Alveolata, Apicomplexa, Aconoidasida, Haemosporida (haemosporidians), Plasmodiidae, Plasmodium, Plasmodium (Plasmodium), Plasmodium ovale (malaria parasite P. ovale), Plasmodium ovale wallikeri	Predicted	1 out of 5			FLRD01001310;				2016-10-05	2017-06-07
A0A1A9AK79	NZ_ALQR01000038.1:907-4200	100	33	0	0	1095	997	51	83	2e-09	74.3	A0A1A9AK79	A0A1A9AK79_9APIC	unreviewed	Uncharacterized protein	POVWA2_076870	Plasmodium ovale wallikeri	83	unreviewed	864142	cellular organisms, Eukaryota, Alveolata, Apicomplexa, Aconoidasida, Haemosporida (haemosporidians), Plasmodiidae, Plasmodium, Plasmodium (Plasmodium), Plasmodium ovale (malaria parasite P. ovale), Plasmodium ovale wallikeri	Predicted	1 out of 5			FLRE01001690;				2016-10-05	2017-06-07
A0A1A9AKI0	NZ_AAZP01000219.1:551-721	100	36	0	0	109	2	1	36	4e-13	81.3	A0A1A9AKI0	A0A1A9AKI0_9APIC	unreviewed	Uncharacterized protein	POVWA2_077480	Plasmodium ovale wallikeri	112	unreviewed	864142	cellular organisms, Eukaryota, Alveolata, Apicomplexa, Aconoidasida, Haemosporida (haemosporidians), Plasmodiidae, Plasmodium, Plasmodium (Plasmodium), Plasmodium ovale (malaria parasite P. ovale), Plasmodium ovale wallikeri	Predicted	1 out of 5			FLRE01001749;				2016-10-05	2017-06-07
A0A1A9AKK5	NZ_FSLH01000021.1:647-813	100	42	0	0	165	40	43	84	4e-15	87.8	A0A1A9AKK5	A0A1A9AKK5_9APIC	unreviewed	Uncharacterized protein	POVWA1_080440	Plasmodium ovale wallikeri	84	unreviewed	864142	cellular organisms, Eukaryota, Alveolata, Apicomplexa, Aconoidasida, Haemosporida (haemosporidians), Plasmodiidae, Plasmodium, Plasmodium (Plasmodium), Plasmodium ovale (malaria parasite P. ovale), Plasmodium ovale wallikeri	Predicted	1 out of 5			FLRD01001394;				2016-10-05	2017-06-07
A0A1A9AKQ5	NZ_CMHF01000075.1:1881-2051	100	44	0	0	1	132	56	99	4e-16	90.9	A0A1A9AKQ5	A0A1A9AKQ5_9APIC	unreviewed	Uncharacterized protein	POVWA2_075140	Plasmodium ovale wallikeri	99	unreviewed	864142	cellular organisms, Eukaryota, Alveolata, Apicomplexa, Aconoidasida, Haemosporida (haemosporidians), Plasmodiidae, Plasmodium, Plasmodium (Plasmodium), Plasmodium ovale (malaria parasite P. ovale), Plasmodium ovale wallikeri	Predicted	1 out of 5			FLRE01001562;				2016-10-05	2017-06-07
A0A1A9AKQ9	NZ_CQSC01000245.1:294-460	98.11	53	1	0	1	159	66	118	2e-23	115.2	A0A1A9AKQ9	A0A1A9AKQ9_9APIC	unreviewed	Uncharacterized protein	POVWA2_075160	Plasmodium ovale wallikeri	118	unreviewed	864142	cellular organisms, Eukaryota, Alveolata, Apicomplexa, Aconoidasida, Haemosporida (haemosporidians), Plasmodiidae, Plasmodium, Plasmodium (Plasmodium), Plasmodium ovale (malaria parasite P. ovale), Plasmodium ovale wallikeri	Predicted	1 out of 5			FLRE01001564;				2016-10-05	2017-06-07
A0A1A9AKT9	NZ_CMKS01000111.1:5-175	98.21	56	1	0	169	2	59	114	6e-23	113.6	A0A1A9AKT9	A0A1A9AKT9_9APIC	unreviewed	Uncharacterized protein	POVWA1_078610	Plasmodium ovale wallikeri	158	unreviewed	864142	cellular organisms, Eukaryota, Alveolata, Apicomplexa, Aconoidasida, Haemosporida (haemosporidians), Plasmodiidae, Plasmodium, Plasmodium (Plasmodium), Plasmodium ovale (malaria parasite P. ovale), Plasmodium ovale wallikeri	Predicted	1 out of 5			FLRD01001215;				2016-10-05	2017-06-07
A0A1A9AL19	NZ_CGZQ01000103.1:247-415	100	51	0	0	1	153	2	52	2e-21	108.6	A0A1A9AL19	A0A1A9AL19_9APIC	unreviewed	Uncharacterized protein	POVWA2_075150	Plasmodium ovale wallikeri	151	unreviewed	864142	cellular organisms, Eukaryota, Alveolata, Apicomplexa, Aconoidasida, Haemosporida (haemosporidians), Plasmodiidae, Plasmodium, Plasmodium (Plasmodium), Plasmodium ovale (malaria parasite P. ovale), Plasmodium ovale wallikeri	Predicted	1 out of 5			FLRE01001563;				2016-10-05	2017-06-07
A0A1A9AL85	NZ_PJCX01000431.1:188-496	96.88	32	1	0	40	135	649	680	5e-09	67.8	A0A1A9AL85	A0A1A9AL85_9APIC	unreviewed	PIR Superfamily Protein	POVWA2_076340	Plasmodium ovale wallikeri	680	unreviewed	864142	cellular organisms, Eukaryota, Alveolata, Apicomplexa, Aconoidasida, Haemosporida (haemosporidians), Plasmodiidae, Plasmodium, Plasmodium (Plasmodium), Plasmodium ovale (malaria parasite P. ovale), Plasmodium ovale wallikeri	Predicted	1 out of 5		Coiled coil (1)	FLRE01001625;				2016-10-05	2017-12-20
A0A1A9ALB9	NZ_CKCF01000054.1:545-713	100	56	0	0	169	2	22	77	4e-25	120.9	A0A1A9ALB9	A0A1A9ALB9_9APIC	unreviewed	Uncharacterized protein	POVWA1_079460	Plasmodium ovale wallikeri	121	unreviewed	864142	cellular organisms, Eukaryota, Alveolata, Apicomplexa, Aconoidasida, Haemosporida (haemosporidians), Plasmodiidae, Plasmodium, Plasmodium (Plasmodium), Plasmodium ovale (malaria parasite P. ovale), Plasmodium ovale wallikeri	Predicted	1 out of 5			FLRD01001310;				2016-10-05	2017-06-07
A0A1A9ALF6	NZ_FSLH01000020.1:403-572	100	53	0	0	12	170	1	53	2e-21	109	A0A1A9ALF6	A0A1A9ALF6_9APIC	unreviewed	Uncharacterized protein	POVWA1_081740	Plasmodium ovale wallikeri	164	unreviewed	864142	cellular organisms, Eukaryota, Alveolata, Apicomplexa, Aconoidasida, Haemosporida (haemosporidians), Plasmodiidae, Plasmodium, Plasmodium (Plasmodium), Plasmodium ovale (malaria parasite P. ovale), Plasmodium ovale wallikeri	Predicted	1 out of 5			FLRD01001505;				2016-10-05	2017-06-07
A0A1A9ALL9	NZ_CZJV02000012.1:635-749	100	30	0	0	91	2	146	175	1e-09	69.7	A0A1A9ALL9	A0A1A9ALL9_9APIC	unreviewed	PIR Superfamily Protein	POVWA1_080200	Plasmodium ovale wallikeri	211	unreviewed	864142	cellular organisms, Eukaryota, Alveolata, Apicomplexa, Aconoidasida, Haemosporida (haemosporidians), Plasmodiidae, Plasmodium, Plasmodium (Plasmodium), Plasmodium ovale (malaria parasite P. ovale), Plasmodium ovale wallikeri	Predicted	1 out of 5			FLRD01001370;				2016-10-05	2017-06-07
A0A1A9ALN9	NZ_NPOA01000073.1:1-229	96.43	28	1	0	4	87	32	59	3e-08	65.1	A0A1A9ALN9	A0A1A9ALN9_9APIC	unreviewed	STP1 protein	POVWA2_076620	Plasmodium ovale wallikeri	356	unreviewed	864142	cellular organisms, Eukaryota, Alveolata, Apicomplexa, Aconoidasida, Haemosporida (haemosporidians), Plasmodiidae, Plasmodium, Plasmodium (Plasmodium), Plasmodium ovale (malaria parasite P. ovale), Plasmodium ovale wallikeri	Predicted	1 out of 5		Coiled coil (1); Domain (1)	FLRE01001662;				2016-10-05	2017-12-20
A0A1A9ALP3	NZ_CMKS01000075.1:525-691	100	41	0	0	3	125	38	78	5e-15	87.4	A0A1A9ALP3	A0A1A9ALP3_9APIC	unreviewed	Uncharacterized protein	POVWA2_077490	Plasmodium ovale wallikeri	109	unreviewed	864142	cellular organisms, Eukaryota, Alveolata, Apicomplexa, Aconoidasida, Haemosporida (haemosporidians), Plasmodiidae, Plasmodium, Plasmodium (Plasmodium), Plasmodium ovale (malaria parasite P. ovale), Plasmodium ovale wallikeri	Predicted	1 out of 5			FLRE01001749;				2016-10-05	2017-06-07
A0A1A9ALS8	NZ_QLAN01000100.1:145-272	95.24	42	2	0	128	3	23	64	9e-17	93.2	A0A1A9ALS8	A0A1A9ALS8_9APIC	unreviewed	Uncharacterized protein	POVWA2_077690	Plasmodium ovale wallikeri	79	unreviewed	864142	cellular organisms, Eukaryota, Alveolata, Apicomplexa, Aconoidasida, Haemosporida (haemosporidians), Plasmodiidae, Plasmodium, Plasmodium (Plasmodium), Plasmodium ovale (malaria parasite P. ovale), Plasmodium ovale wallikeri	Predicted	1 out of 5			FLRE01001776;				2016-10-05	2017-06-07
A0A1A9ALT2	NZ_CKCF01000052.1:1497-1663	100	38	0	0	1	114	984	1021	3e-14	84.7	A0A1A9ALT2	A0A1A9ALT2_9APIC	unreviewed	STP1 protein	POVWA1_080430	Plasmodium ovale wallikeri	1021	unreviewed	864142	cellular organisms, Eukaryota, Alveolata, Apicomplexa, Aconoidasida, Haemosporida (haemosporidians), Plasmodiidae, Plasmodium, Plasmodium (Plasmodium), Plasmodium ovale (malaria parasite P. ovale), Plasmodium ovale wallikeri	Predicted	1 out of 5		Coiled coil (1); Domain (1); Transmembrane (1)	FLRD01001393;				2016-10-05	2017-12-20
A0A1A9ALZ0	NZ_AAZP01000219.1:384-550	100	41	0	0	165	43	38	78	1e-14	86.3	A0A1A9ALZ0	A0A1A9ALZ0_9APIC	unreviewed	Uncharacterized protein	POVWA1_082990	Plasmodium ovale wallikeri	137	unreviewed	864142	cellular organisms, Eukaryota, Alveolata, Apicomplexa, Aconoidasida, Haemosporida (haemosporidians), Plasmodiidae, Plasmodium, Plasmodium (Plasmodium), Plasmodium ovale (malaria parasite P. ovale), Plasmodium ovale wallikeri	Predicted	1 out of 5			FLRD01001588;				2016-10-05	2017-06-07
A0A1A9AM08	NZ_BCMN01000082.1:638-808	100	57	0	0	171	1	47	103	1e-23	116.3	A0A1A9AM08	A0A1A9AM08_9APIC	unreviewed	Uncharacterized protein	POVWA1_080820	Plasmodium ovale wallikeri	137	unreviewed	864142	cellular organisms, Eukaryota, Alveolata, Apicomplexa, Aconoidasida, Haemosporida (haemosporidians), Plasmodiidae, Plasmodium, Plasmodium (Plasmodium), Plasmodium ovale (malaria parasite P. ovale), Plasmodium ovale wallikeri	Predicted	1 out of 5			FLRD01001410;				2016-10-05	2017-06-07
A0A1A9AM51	NZ_PYPV01000536.1:1-115	100	37	0	0	3	113	33	69	2e-15	88.6	A0A1A9AM51	A0A1A9AM51_9APIC	unreviewed	Uncharacterized protein	POVWA2_077700	Plasmodium ovale wallikeri	84	unreviewed	864142	cellular organisms, Eukaryota, Alveolata, Apicomplexa, Aconoidasida, Haemosporida (haemosporidians), Plasmodiidae, Plasmodium, Plasmodium (Plasmodium), Plasmodium ovale (malaria parasite P. ovale), Plasmodium ovale wallikeri	Predicted	1 out of 5			FLRE01001776;				2016-10-05	2017-06-07
A0A1A9AMF7	NZ_FSLH01000021.1:647-813	100	42	0	0	165	40	38	79	4e-15	87.8	A0A1A9AMF7	A0A1A9AMF7_9APIC	unreviewed	Uncharacterized protein	POVWA2_079080	Plasmodium ovale wallikeri	79	unreviewed	864142	cellular organisms, Eukaryota, Alveolata, Apicomplexa, Aconoidasida, Haemosporida (haemosporidians), Plasmodiidae, Plasmodium, Plasmodium (Plasmodium), Plasmodium ovale (malaria parasite P. ovale), Plasmodium ovale wallikeri	Predicted	1 out of 5			FLRE01001823;				2016-10-05	2017-06-07
A0A1A9AMP8	NZ_CMKS01000057.1:738-907	96.67	30	1	0	125	36	52	81	3e-08	64.7	A0A1A9AMP8	A0A1A9AMP8_9APIC	unreviewed	Uncharacterized protein	POVWA2_082450	Plasmodium ovale wallikeri	81	unreviewed	864142	cellular organisms, Eukaryota, Alveolata, Apicomplexa, Aconoidasida, Haemosporida (haemosporidians), Plasmodiidae, Plasmodium, Plasmodium (Plasmodium), Plasmodium ovale (malaria parasite P. ovale), Plasmodium ovale wallikeri	Predicted	1 out of 5			FLRE01002085;				2016-10-05	2017-06-07
A0A1A9AMV0	NZ_BFCK01000577.1:10-179	97.67	43	1	0	169	41	277	319	3e-17	94.7	A0A1A9AMV0	A0A1A9AMV0_9APIC	unreviewed	PIR Superfamily Protein	POVWA2_080150	Plasmodium ovale wallikeri	319	unreviewed	864142	cellular organisms, Eukaryota, Alveolata, Apicomplexa, Aconoidasida, Haemosporida (haemosporidians), Plasmodiidae, Plasmodium, Plasmodium (Plasmodium), Plasmodium ovale (malaria parasite P. ovale), Plasmodium ovale wallikeri	Predicted	1 out of 5		Transmembrane (1)	FLRE01001868;				2016-10-05	2017-06-07
A0A1A9AN58	NZ_NUWS01000084.1:46-214	97.14	35	1	0	167	63	96	130	4e-11	74.3	A0A1A9AN58	A0A1A9AN58_9APIC	unreviewed	Uncharacterized protein	POVWA2_080690	Plasmodium ovale wallikeri	130	unreviewed	864142	cellular organisms, Eukaryota, Alveolata, Apicomplexa, Aconoidasida, Haemosporida (haemosporidians), Plasmodiidae, Plasmodium, Plasmodium (Plasmodium), Plasmodium ovale (malaria parasite P. ovale), Plasmodium ovale wallikeri	Predicted	1 out of 5			FLRE01001920;				2016-10-05	2017-06-07
A0A1A9AN67	NZ_CGZQ01000067.1:482-645	100	43	0	0	1	129	76	118	4e-17	94.4	A0A1A9AN67	A0A1A9AN67_9APIC	unreviewed	PIR Superfamily Protein	POVWA2_080250	Plasmodium ovale wallikeri	174	unreviewed	864142	cellular organisms, Eukaryota, Alveolata, Apicomplexa, Aconoidasida, Haemosporida (haemosporidians), Plasmodiidae, Plasmodium, Plasmodium (Plasmodium), Plasmodium ovale (malaria parasite P. ovale), Plasmodium ovale wallikeri	Predicted	1 out of 5			FLRE01001880;				2016-10-05	2017-06-07
A0A1A9ANI7	NZ_BFCU01000170.1:23-192	100	53	0	0	159	1	1	53	4e-22	110.9	A0A1A9ANI7	A0A1A9ANI7_9APIC	unreviewed	Uncharacterized protein	POVWA2_081510	Plasmodium ovale wallikeri	180	unreviewed	864142	cellular organisms, Eukaryota, Alveolata, Apicomplexa, Aconoidasida, Haemosporida (haemosporidians), Plasmodiidae, Plasmodium, Plasmodium (Plasmodium), Plasmodium ovale (malaria parasite P. ovale), Plasmodium ovale wallikeri	Predicted	1 out of 5			FLRE01002008;				2016-10-05	2017-06-07
A0A1A9ANW3	NZ_CGZQ01000081.1:561-729	100	47	0	0	156	16	21	67	3e-19	101.3	A0A1A9ANW3	A0A1A9ANW3_9APIC	unreviewed	Uncharacterized protein	POVWA2_081520	Plasmodium ovale wallikeri	67	unreviewed	864142	cellular organisms, Eukaryota, Alveolata, Apicomplexa, Aconoidasida, Haemosporida (haemosporidians), Plasmodiidae, Plasmodium, Plasmodium (Plasmodium), Plasmodium ovale (malaria parasite P. ovale), Plasmodium ovale wallikeri	Predicted	1 out of 5			FLRE01002009;				2016-10-05	2017-06-07
A0A1A9ANZ9	NZ_PYPZ01000287.1:206-376	97.73	44	1	0	1	132	162	205	4e-17	94.4	A0A1A9ANZ9	A0A1A9ANZ9_9APIC	unreviewed	Uncharacterized protein	POVWA2_082520	Plasmodium ovale wallikeri	270	unreviewed	864142	cellular organisms, Eukaryota, Alveolata, Apicomplexa, Aconoidasida, Haemosporida (haemosporidians), Plasmodiidae, Plasmodium, Plasmodium (Plasmodium), Plasmodium ovale (malaria parasite P. ovale), Plasmodium ovale wallikeri	Predicted	1 out of 5			FLRE01002097;				2016-10-05	2017-06-07
A0A1A9AP32	NZ_BFCS01000358.1:1-432	96.88	32	1	0	71	166	1	32	8e-08	63.9	A0A1A9AP32	A0A1A9AP32_9APIC	unreviewed	Uncharacterized protein	POVWA2_082660	Plasmodium ovale wallikeri	73	unreviewed	864142	cellular organisms, Eukaryota, Alveolata, Apicomplexa, Aconoidasida, Haemosporida (haemosporidians), Plasmodiidae, Plasmodium, Plasmodium (Plasmodium), Plasmodium ovale (malaria parasite P. ovale), Plasmodium ovale wallikeri	Predicted	1 out of 5			FLRE01002119;				2016-10-05	2017-06-07
A0A1A9AP79	NZ_BFCK01000866.1:5-172	100	56	0	0	168	1	34	89	5e-23	114	A0A1A9AP79	A0A1A9AP79_9APIC	unreviewed	Uncharacterized protein	POVWA2_085250	Plasmodium ovale wallikeri	124	unreviewed	864142	cellular organisms, Eukaryota, Alveolata, Apicomplexa, Aconoidasida, Haemosporida (haemosporidians), Plasmodiidae, Plasmodium, Plasmodium (Plasmodium), Plasmodium ovale (malaria parasite P. ovale), Plasmodium ovale wallikeri	Predicted	1 out of 5			FLRE01002371;				2016-10-05	2017-06-07
A0A1A9AP86	NZ_PYPZ01000519.1:1-125	97.56	41	1	0	2	124	129	169	1e-14	86.3	A0A1A9AP86	A0A1A9AP86_9APIC	unreviewed	Uncharacterized protein	POVWA2_082770	Plasmodium ovale wallikeri	213	unreviewed	864142	cellular organisms, Eukaryota, Alveolata, Apicomplexa, Aconoidasida, Haemosporida (haemosporidians), Plasmodiidae, Plasmodium, Plasmodium (Plasmodium), Plasmodium ovale (malaria parasite P. ovale), Plasmodium ovale wallikeri	Predicted	1 out of 5			FLRE01002128;				2016-10-05	2017-06-07
A0A1A9APD8	NZ_CGZQ01000067.1:1332-1502	97.92	48	1	0	27	170	201	248	7e-19	100.1	A0A1A9APD8	A0A1A9APD8_9APIC	unreviewed	PIR Superfamily Protein	POVWA2_082550	Plasmodium ovale wallikeri	251	unreviewed	864142	cellular organisms, Eukaryota, Alveolata, Apicomplexa, Aconoidasida, Haemosporida (haemosporidians), Plasmodiidae, Plasmodium, Plasmodium (Plasmodium), Plasmodium ovale (malaria parasite P. ovale), Plasmodium ovale wallikeri	Predicted	1 out of 5			FLRE01002099;				2016-10-05	2017-06-07
A0A1A9APE6	NZ_AAZP01000219.1:551-721	100	36	0	0	109	2	1	36	4e-13	81.3	A0A1A9APE6	A0A1A9APE6_9APIC	unreviewed	Uncharacterized protein	POVWA2_082560	Plasmodium ovale wallikeri	79	unreviewed	864142	cellular organisms, Eukaryota, Alveolata, Apicomplexa, Aconoidasida, Haemosporida (haemosporidians), Plasmodiidae, Plasmodium, Plasmodium (Plasmodium), Plasmodium ovale (malaria parasite P. ovale), Plasmodium ovale wallikeri	Predicted	1 out of 5			FLRE01002108;				2016-10-05	2017-06-07
A0A1A9APV5	NZ_AAZP01000219.1:551-721	100	36	0	0	109	2	1	36	4e-13	81.3	A0A1A9APV5	A0A1A9APV5_9APIC	unreviewed	Uncharacterized protein	POVWA2_083350	Plasmodium ovale wallikeri	68	unreviewed	864142	cellular organisms, Eukaryota, Alveolata, Apicomplexa, Aconoidasida, Haemosporida (haemosporidians), Plasmodiidae, Plasmodium, Plasmodium (Plasmodium), Plasmodium ovale (malaria parasite P. ovale), Plasmodium ovale wallikeri	Predicted	1 out of 5			FLRE01002200;				2016-10-05	2017-06-07
A0A1A9AQX7	NZ_FXYJ02000048.1:471-602	100	33	0	0	126	28	38	70	6e-11	73.9	A0A1A9AQX7	A0A1A9AQX7_9APIC	unreviewed	Uncharacterized protein	POVWA2_091660	Plasmodium ovale wallikeri	92	unreviewed	864142	cellular organisms, Eukaryota, Alveolata, Apicomplexa, Aconoidasida, Haemosporida (haemosporidians), Plasmodiidae, Plasmodium, Plasmodium (Plasmodium), Plasmodium ovale (malaria parasite P. ovale), Plasmodium ovale wallikeri	Predicted	1 out of 5			FLRE01002868;				2016-10-05	2017-06-07
A0A1A9AR10	NZ_BFCS01000362.1:81-251	96.49	57	2	0	1	171	48	104	2e-22	111.7	A0A1A9AR10	A0A1A9AR10_9APIC	unreviewed	Uncharacterized protein	POVWA2_092050	Plasmodium ovale wallikeri	138	unreviewed	864142	cellular organisms, Eukaryota, Alveolata, Apicomplexa, Aconoidasida, Haemosporida (haemosporidians), Plasmodiidae, Plasmodium, Plasmodium (Plasmodium), Plasmodium ovale (malaria parasite P. ovale), Plasmodium ovale wallikeri	Predicted	1 out of 5			FLRE01002881;				2016-10-05	2017-06-07
A0A1A9AR56	NZ_CMHF01000063.1:913-1083	98.25	57	1	0	1	171	2	58	4e-23	114.4	A0A1A9AR56	A0A1A9AR56_9APIC	unreviewed	Uncharacterized protein	POVWA2_085700	Plasmodium ovale wallikeri	117	unreviewed	864142	cellular organisms, Eukaryota, Alveolata, Apicomplexa, Aconoidasida, Haemosporida (haemosporidians), Plasmodiidae, Plasmodium, Plasmodium (Plasmodium), Plasmodium ovale (malaria parasite P. ovale), Plasmodium ovale wallikeri	Predicted	1 out of 5			FLRE01002419;				2016-10-05	2017-06-07
A0A1A9AR62	NZ_CMKS01000111.1:176-346	95.24	42	2	0	169	44	40	81	2e-13	82	A0A1A9AR62	A0A1A9AR62_9APIC	unreviewed	Uncharacterized protein	POVWA2_086240	Plasmodium ovale wallikeri	82	unreviewed	864142	cellular organisms, Eukaryota, Alveolata, Apicomplexa, Aconoidasida, Haemosporida (haemosporidians), Plasmodiidae, Plasmodium, Plasmodium (Plasmodium), Plasmodium ovale (malaria parasite P. ovale), Plasmodium ovale wallikeri	Predicted	1 out of 5			FLRE01002453;				2016-10-05	2017-06-07
A0A1A9ARI9	NZ_CFSM01000135.1:355-521	97.62	42	1	0	165	40	38	79	9e-14	83.2	A0A1A9ARI9	A0A1A9ARI9_9APIC	unreviewed	Uncharacterized protein	POVWA2_088610	Plasmodium ovale wallikeri	79	unreviewed	864142	cellular organisms, Eukaryota, Alveolata, Apicomplexa, Aconoidasida, Haemosporida (haemosporidians), Plasmodiidae, Plasmodium, Plasmodium (Plasmodium), Plasmodium ovale (malaria parasite P. ovale), Plasmodium ovale wallikeri	Predicted	1 out of 5			FLRE01002615;				2016-10-05	2017-06-07
A0A1A9ARS1	NZ_BFCS01000362.1:81-251	98.25	57	1	0	1	171	2	58	1e-23	115.9	A0A1A9ARS1	A0A1A9ARS1_9APIC	unreviewed	Uncharacterized protein	POVWA2_096070	Plasmodium ovale wallikeri	92	unreviewed	864142	cellular organisms, Eukaryota, Alveolata, Apicomplexa, Aconoidasida, Haemosporida (haemosporidians), Plasmodiidae, Plasmodium, Plasmodium (Plasmodium), Plasmodium ovale (malaria parasite P. ovale), Plasmodium ovale wallikeri	Predicted	1 out of 5			FLRE01003345;				2016-10-05	2017-06-07
A0A1A9ARX4	NZ_NAAU01000102.1:1-148	100	31	0	0	16	108	52	82	1e-08	66.2	A0A1A9ARX4	A0A1A9ARX4_9APIC	unreviewed	Uncharacterized protein	POVWA2_088770	Plasmodium ovale wallikeri	82	unreviewed	864142	cellular organisms, Eukaryota, Alveolata, Apicomplexa, Aconoidasida, Haemosporida (haemosporidians), Plasmodiidae, Plasmodium, Plasmodium (Plasmodium), Plasmodium ovale (malaria parasite P. ovale), Plasmodium ovale wallikeri	Predicted	1 out of 5			FLRE01002631;				2016-10-05	2017-06-07
A0A1A9AS49	NZ_BFCK01000792.1:80-250	98	50	1	0	151	2	63	112	3e-20	104.8	A0A1A9AS49	A0A1A9AS49_9APIC	unreviewed	Uncharacterized protein	POVWA2_090170	Plasmodium ovale wallikeri	155	unreviewed	864142	cellular organisms, Eukaryota, Alveolata, Apicomplexa, Aconoidasida, Haemosporida (haemosporidians), Plasmodiidae, Plasmodium, Plasmodium (Plasmodium), Plasmodium ovale (malaria parasite P. ovale), Plasmodium ovale wallikeri	Predicted	1 out of 5			FLRE01002738;				2016-10-05	2017-06-07
A0A1A9AS52	NZ_BCMN01000082.1:468-637	95.35	43	2	0	40	168	191	233	1e-14	85.9	A0A1A9AS52	A0A1A9AS52_9APIC	unreviewed	PIR Superfamily Protein	POVWA2_089660	Plasmodium ovale wallikeri	249	unreviewed	864142	cellular organisms, Eukaryota, Alveolata, Apicomplexa, Aconoidasida, Haemosporida (haemosporidians), Plasmodiidae, Plasmodium, Plasmodium (Plasmodium), Plasmodium ovale (malaria parasite P. ovale), Plasmodium ovale wallikeri	Predicted	1 out of 5			FLRE01002674;				2016-10-05	2017-06-07
A0A1A9ASA6	NZ_AUTF01000074.1:1459-1629	100	57	0	0	171	1	2	58	5e-25	120.6	A0A1A9ASA6	A0A1A9ASA6_9APIC	unreviewed	Uncharacterized protein	POVWA1_062120 POVWA2_092020	Plasmodium ovale wallikeri	103	unreviewed	864142	cellular organisms, Eukaryota, Alveolata, Apicomplexa, Aconoidasida, Haemosporida (haemosporidians), Plasmodiidae, Plasmodium, Plasmodium (Plasmodium), Plasmodium ovale (malaria parasite P. ovale), Plasmodium ovale wallikeri	Predicted	1 out of 5			FLRD01000171;FLRE01002876;				2016-10-05	2017-06-07
A0A1A9ASE0	NZ_CZYR01000137.1:141-288	100	34	0	0	24	125	16	49	8e-11	73.6	A0A1A9ASE0	A0A1A9ASE0_9APIC	unreviewed	STP1 protein	POVWA2_091410	Plasmodium ovale wallikeri	940	unreviewed	864142	cellular organisms, Eukaryota, Alveolata, Apicomplexa, Aconoidasida, Haemosporida (haemosporidians), Plasmodiidae, Plasmodium, Plasmodium (Plasmodium), Plasmodium ovale (malaria parasite P. ovale), Plasmodium ovale wallikeri	Predicted	1 out of 5		Coiled coil (2); Domain (1)	FLRE01002853;				2016-10-05	2017-12-20
A0A1A9ASP5	NZ_CKCF01000057.1:411-580	97.62	42	1	0	45	170	5	46	4e-15	87.8	A0A1A9ASP5	A0A1A9ASP5_9APIC	unreviewed	PIR Superfamily Protein	POVWA2_092200	Plasmodium ovale wallikeri	412	unreviewed	864142	cellular organisms, Eukaryota, Alveolata, Apicomplexa, Aconoidasida, Haemosporida (haemosporidians), Plasmodiidae, Plasmodium, Plasmodium (Plasmodium), Plasmodium ovale (malaria parasite P. ovale), Plasmodium ovale wallikeri	Predicted	1 out of 5			FLRE01002901;				2016-10-05	2017-06-07
A0A1A9ASR8	NZ_LPSC01000029.1:647-782	97.78	45	1	0	136	2	31	75	8e-18	96.7	A0A1A9ASR8	A0A1A9ASR8_9APIC	unreviewed	Uncharacterized protein	POVWA2_092640	Plasmodium ovale wallikeri	93	unreviewed	864142	cellular organisms, Eukaryota, Alveolata, Apicomplexa, Aconoidasida, Haemosporida (haemosporidians), Plasmodiidae, Plasmodium, Plasmodium (Plasmodium), Plasmodium ovale (malaria parasite P. ovale), Plasmodium ovale wallikeri	Predicted	1 out of 5			FLRE01002953;				2016-10-05	2017-06-07
A0A1A9ASW0	NZ_LYMJ01000088.1:2-138	97.3	37	1	0	137	27	38	74	6e-13	80.5	A0A1A9ASW0	A0A1A9ASW0_9APIC	unreviewed	Uncharacterized protein	POVWA2_094900	Plasmodium ovale wallikeri	74	unreviewed	864142	cellular organisms, Eukaryota, Alveolata, Apicomplexa, Aconoidasida, Haemosporida (haemosporidians), Plasmodiidae, Plasmodium, Plasmodium (Plasmodium), Plasmodium ovale (malaria parasite P. ovale), Plasmodium ovale wallikeri	Predicted	1 out of 5			FLRE01003210;				2016-10-05	2017-06-07
A0A1A9ASY0	NZ_CMKS01000102.1:37-207	100	45	0	0	3	137	69	113	4e-17	94.4	A0A1A9ASY0	A0A1A9ASY0_9APIC	unreviewed	Uncharacterized protein	POVWA2_095510	Plasmodium ovale wallikeri	113	unreviewed	864142	cellular organisms, Eukaryota, Alveolata, Apicomplexa, Aconoidasida, Haemosporida (haemosporidians), Plasmodiidae, Plasmodium, Plasmodium (Plasmodium), Plasmodium ovale (malaria parasite P. ovale), Plasmodium ovale wallikeri	Predicted	1 out of 5			FLRE01003250;				2016-10-05	2017-06-07
A0A1A9AT22	NZ_FLQI01000109.1:83-252	100	53	0	0	12	170	19	71	8e-21	106.7	A0A1A9AT22	A0A1A9AT22_9APIC	unreviewed	Uncharacterized protein	POVWA2_096140	Plasmodium ovale wallikeri	115	unreviewed	864142	cellular organisms, Eukaryota, Alveolata, Apicomplexa, Aconoidasida, Haemosporida (haemosporidians), Plasmodiidae, Plasmodium, Plasmodium (Plasmodium), Plasmodium ovale (malaria parasite P. ovale), Plasmodium ovale wallikeri	Predicted	1 out of 5			FLRE01003354;				2016-10-05	2017-06-07
A0A1A9AT85	NZ_CGZQ01000144.1:144-308	100	54	0	0	164	3	8	61	1e-23	115.9	A0A1A9AT85	A0A1A9AT85_9APIC	unreviewed	Uncharacterized protein	POVWA2_095520	Plasmodium ovale wallikeri	129	unreviewed	864142	cellular organisms, Eukaryota, Alveolata, Apicomplexa, Aconoidasida, Haemosporida (haemosporidians), Plasmodiidae, Plasmodium, Plasmodium (Plasmodium), Plasmodium ovale (malaria parasite P. ovale), Plasmodium ovale wallikeri	Predicted	1 out of 5			FLRE01003250;				2016-10-05	2017-06-07
A0A1A9ATG9	NZ_PYPV01000585.1:1-102	100	30	0	0	91	2	14	43	2e-08	65.5	A0A1A9ATG9	A0A1A9ATG9_9APIC	unreviewed	Uncharacterized protein	POVWA2_096820	Plasmodium ovale wallikeri	96	unreviewed	864142	cellular organisms, Eukaryota, Alveolata, Apicomplexa, Aconoidasida, Haemosporida (haemosporidians), Plasmodiidae, Plasmodium, Plasmodium (Plasmodium), Plasmodium ovale (malaria parasite P. ovale), Plasmodium ovale wallikeri	Predicted	1 out of 5			FLRE01003435;				2016-10-05	2017-06-07
A0A1B6G9D8	NZ_CZJT01000051.1:698-3990	100	74	0	0	324	103	1	74	3e-33	152.9	A0A1B6G9D8	A0A1B6G9D8_9HEMI	unreviewed	Uncharacterized protein (Fragment)	g.49168	Cuerna arida	104	unreviewed	1464854	cellular organisms, Eukaryota, Opisthokonta, Metazoa, Eumetazoa, Bilateria, Protostomia, Ecdysozoa, Panarthropoda, Arthropoda, Mandibulata, Pancrustacea, Hexapoda, Insecta, Dicondylia, Pterygota (winged insects), Neoptera, Paraneoptera, Hemiptera, Auchenorrhyncha, Cicadomorpha, Membracoidea, Cicadellidae (leafhoppers), Cicadellinae, Proconiini, Cuerna, Cuerna arida	Predicted	1 out of 5		Non-terminal residue (2)	GECZ01010715;				2016-11-02	2018-10-10
A0A1B8J9M3	NZ_CMHG01000050.1:5-174	96.43	56	2	0	2	169	11	66	1e-23	115.9	A0A1B8J9M3	A0A1B8J9M3_9HELI	unreviewed	Uncharacterized protein (Fragment)	BA723_10015	Helicobacter sp. CLO-3	112	unreviewed	211	cellular organisms, Bacteria, Proteobacteria, delta/epsilon subdivisions, Epsilonproteobacteria, Campylobacterales, Helicobacteraceae, Helicobacter, Helicobacter sp. CLO-3	Predicted	1 out of 5	CAUTION: The sequence shown here is derived from an EMBL/GenBank/DDBJ whole genome shotgun (WGS) entry which is preliminary data. {ECO:0000313|EMBL:OBV29650.1}.	Non-terminal residue (1)	MAMQ01000050;	WP_066454656.1;			2016-11-02	2017-06-07
A0A1C0BGV6	NZ_MBSV01000122.1:94-402	100	39	0	0	309	193	32	70	1e-13	83.2	A0A1C0BGV6	A0A1C0BGV6_9CLOT	unreviewed	Uncharacterized protein	A7X67_01720	Clostridium sp. W14A	70	unreviewed	1849176	cellular organisms, Bacteria, Terrabacteria group, Firmicutes, Clostridia, Clostridiales, Clostridiaceae, Clostridium, Clostridium sp. W14A	Predicted	1 out of 5	CAUTION: The sequence shown here is derived from an EMBL/GenBank/DDBJ whole genome shotgun (WGS) entry which is preliminary data. {ECO:0000313|EMBL:OCM99921.1}.		MBSV01000122;	WP_066650411.1;			2016-11-02	2017-06-07
A0A1D1ZYK3	NZ_NWDR01000066.1:1749-5042	98.01	854	17	0	733	3294	1	854	0	1692.6	A0A1D1ZYK3	A0A1D1ZYK3_AUXPR	unreviewed	Uncharacterized protein (Fragment)	g.100085	Auxenochlorella protothecoides (Green microalga) (Chlorella protothecoides)	872	unreviewed	3075	cellular organisms, Eukaryota, Viridiplantae, Chlorophyta, Trebouxiophyceae, Chlorellales, Chlorellaceae, Auxenochlorella, Auxenochlorella protothecoides (Green microalga) (Chlorella protothecoides)	Predicted	1 out of 5		Coiled coil (1); Domain (1); Non-terminal residue (2)	GDKF01006608;				2016-11-30	2017-11-22
A0A1D2A5D6	NZ_LYIQ01000099.1:620-2299	98.23	395	7	0	1185	1	1	395	9e-230	804.7	A0A1D2A5D6	A0A1D2A5D6_AUXPR	unreviewed	Uncharacterized protein (Fragment)	g.100086	Auxenochlorella protothecoides (Green microalga) (Chlorella protothecoides)	413	unreviewed	3075	cellular organisms, Eukaryota, Viridiplantae, Chlorophyta, Trebouxiophyceae, Chlorellales, Chlorellaceae, Auxenochlorella, Auxenochlorella protothecoides (Green microalga) (Chlorella protothecoides)	Predicted	1 out of 5		Non-terminal residue (1)	GDKF01004437;				2016-11-30	2016-11-30
A0A1D3GYR3	NZ_ATPG01000103.1:129-850	100	172	0	0	207	722	1	172	4e-94	352.1	A0A1D3GYR3	A0A1D3GYR3_NEIGO	unreviewed	L1 transposable element	WHOL_00673C	Neisseria gonorrhoeae	181	unreviewed	485	cellular organisms, Bacteria, Proteobacteria, Betaproteobacteria, Neisseriales, Neisseriaceae, Neisseria, Neisseria gonorrhoeae	Predicted	1 out of 5			LT591901;				2016-11-30	2018-05-23
A0A1D3JP28	NZ_FPIJ01000010.1:1847-3180	100	139	0	0	1329	913	4	142	2e-73	285	A0A1D3JP28	A0A1D3JP28_PLABE	unreviewed	Uncharacterized protein (Fragment)	PBNK65E_000494100	Plasmodium berghei	291	unreviewed	5821	cellular organisms, Eukaryota, Alveolata, Apicomplexa, Aconoidasida, Haemosporida (haemosporidians), Plasmodiidae, Plasmodium, Plasmodium (Vinckeia), Plasmodium berghei	Predicted	1 out of 5		Domain (2); Non-terminal residue (1)	FLVA01000049;				2016-11-30	2017-12-20
A0A1D3JPD7	NZ_FPIH01000023.1:675-2529	100	384	0	0	1152	1	1	384	5e-229	802.4	A0A1D3JPD7	A0A1D3JPD7_PLABE	unreviewed	Uncharacterized protein (Fragment)	PBNK65E_000520000	Plasmodium berghei	592	unreviewed	5821	cellular organisms, Eukaryota, Alveolata, Apicomplexa, Aconoidasida, Haemosporida (haemosporidians), Plasmodiidae, Plasmodium, Plasmodium (Vinckeia), Plasmodium berghei	Predicted	1 out of 5		Domain (1); Non-terminal residue (1)	FLVA01000270;				2016-11-30	2017-12-20
A0A1D3JPF3	NZ_FQSZ01000002.1:3949-6601	99.54	432	2	0	278	1573	2	433	3e-236	827	A0A1D3JPF3	A0A1D3JPF3_PLABE	unreviewed	Reverse transcriptase (RNA-dependent DNA polymerase), putative (Fragment)	PBNK65E_000520100	Plasmodium berghei	433	unreviewed	5821	cellular organisms, Eukaryota, Alveolata, Apicomplexa, Aconoidasida, Haemosporida (haemosporidians), Plasmodiidae, Plasmodium, Plasmodium (Vinckeia), Plasmodium berghei	Predicted	1 out of 5		Domain (1); Non-terminal residue (1)	FLVA01000271;				2016-11-30	2017-12-20
A0A1D3JPL4	NZ_FPIH01000022.1:915-2032	100	169	0	0	1065	559	1	169	1e-94	354.8	A0A1D3JPL4	A0A1D3JPL4_PLABE	unreviewed	Uncharacterized protein (Fragment)	PBNK65E_000520200	Plasmodium berghei	169	unreviewed	5821	cellular organisms, Eukaryota, Alveolata, Apicomplexa, Aconoidasida, Haemosporida (haemosporidians), Plasmodiidae, Plasmodium, Plasmodium (Vinckeia), Plasmodium berghei	Predicted	1 out of 5		Non-terminal residue (2)	FLVA01000271;				2016-11-30	2017-12-20
A0A1E1X1Y6	NZ_JTCH02000047.1:494-1168	99.46	185	1	0	46	600	1	185	3e-110	405.2	A0A1E1X1Y6	A0A1E1X1Y6_9ACAR	unreviewed	Putative reverse transcriptase related protein (Fragment)		Amblyomma aureolatum	185	unreviewed	187763	cellular organisms, Eukaryota, Opisthokonta, Metazoa, Eumetazoa, Bilateria, Protostomia, Ecdysozoa, Panarthropoda, Arthropoda, Chelicerata, Arachnida, Acari, Parasitiformes, Ixodida (ticks), Ixodoidea, Ixodidae (hardbacked ticks), Amblyomminae, Amblyomma, Amblyomma aureolatum	Evidence at transcript level	1 out of 5		Non-terminal residue (2)	GFAC01005903;				2017-01-18	2018-02-28
A0A1E5UEW1	NZ_MKGI01000042.1:1-707	100	200	0	0	24	623	1	200	4e-119	434.9	A0A1E5UEW1	A0A1E5UEW1_9FLAO	unreviewed	Uncharacterized protein	BHF72_2109	Cloacibacterium normanense	200	unreviewed	237258	cellular organisms, Bacteria, FCB group, Bacteroidetes/Chlorobi group, Bacteroidetes, Flavobacteriia, Flavobacteriales, Flavobacteriaceae, Cloacibacterium, Cloacibacterium normanense	Predicted	1 out of 5	CAUTION: The sequence shown here is derived from an EMBL/GenBank/DDBJ whole genome shotgun (WGS) entry which is preliminary data. {ECO:0000313|EMBL:OEL11422.1}.	Domain (1)	MKGI01000042;	WP_069798184.1;			2017-01-18	2017-06-07
A0A1E5UHG4	NZ_CRTU01000081.1:270-489	100	44	0	0	135	4	1	44	4e-18	97.8	A0A1E5UHG4	A0A1E5UHG4_9FLAO	unreviewed	Uncharacterized protein	BHF72_1221	Cloacibacterium normanense	44	unreviewed	237258	cellular organisms, Bacteria, FCB group, Bacteroidetes/Chlorobi group, Bacteroidetes, Flavobacteriia, Flavobacteriales, Flavobacteriaceae, Cloacibacterium, Cloacibacterium normanense	Predicted	1 out of 5	CAUTION: The sequence shown here is derived from an EMBL/GenBank/DDBJ whole genome shotgun (WGS) entry which is preliminary data. {ECO:0000313|EMBL:OEL12296.1}.		MKGI01000006;				2017-01-18	2017-06-07
A0A1F1N3Q1	NZ_QKVX01000015.1:741-904	100	54	0	0	2	163	22	75	5e-29	134	A0A1F1N3Q1	A0A1F1N3Q1_9STRE	unreviewed	Uncharacterized protein	HMPREF2877_06350	Streptococcus sp. HMSC072D03	99	unreviewed	1739381	cellular organisms, Bacteria, Terrabacteria group, Firmicutes, Bacilli, Lactobacillales, Streptococcaceae, Streptococcus, Streptococcus sp. HMSC072D03	Predicted	1 out of 5	CAUTION: The sequence shown here is derived from an EMBL/GenBank/DDBJ whole genome shotgun (WGS) entry which is preliminary data. {ECO:0000313|EMBL:OFS47611.1}.		LWQK01000104;	WP_070579236.1;			2017-02-15	2017-06-07
A0A1F1ZW15	NZ_APME01000129.1:415-1186	98.91	183	2	0	83	631	1	183	2e-107	396.4	A0A1F1ZW15	A0A1F1ZW15_9CORY	unreviewed	Uncharacterized protein (Fragment)	HMPREF3098_00845	Corynebacterium sp. HMSC28B08	183	unreviewed	1581066	cellular organisms, Bacteria, Terrabacteria group, Actinobacteria, Actinobacteria (high G+C Gram-positive bacteria), Corynebacteriales, Corynebacteriaceae, Corynebacterium, Corynebacterium sp. HMSC28B08	Predicted	1 out of 5	CAUTION: The sequence shown here is derived from an EMBL/GenBank/DDBJ whole genome shotgun (WGS) entry which is preliminary data. {ECO:0000313|EMBL:OFT91474.1}.	Domain (1); Non-terminal residue (1)	LWOT01000014;	WP_070433639.1;			2017-02-15	2017-10-25
A0A1J3J1S0	NZ_CGZQ01000069.1:1-1661	100	83	0	0	1169	1417	1	83	7e-38	167.2	A0A1J3J1S0	A0A1J3J1S0_NOCCA	unreviewed	LINE-1 retrotransposable element ORF1 protein (Fragment)	MP_TR13182_c5_g1_i1_g.38721	Noccaea caerulescens (Alpine penny-cress) (Thlaspi caerulescens)	83	unreviewed	107243	cellular organisms, Eukaryota, Viridiplantae, Streptophyta, Streptophytina, Embryophyta, Tracheophyta, Euphyllophyta, Spermatophyta, Magnoliophyta, Mesangiospermae, eudicotyledons, Gunneridae, Pentapetalae, rosids, malvids, Brassicales, Brassicaceae, Coluteocarpeae, Noccaea, Noccaea caerulescens (Alpine penny-cress) (Thlaspi caerulescens)	Predicted	1 out of 5		Domain (1); Non-terminal residue (2)	GEVM01020106;				2017-02-15	2017-10-25
A0A1L8DBI3	NZ_CKCF01000050.1:1319-1480	100	53	0	0	2	160	20	72	2e-24	119	A0A1L8DBI3	A0A1L8DBI3_9DIPT	unreviewed	Uncharacterized protein (Fragment)		Nyssomyia neivai	118	unreviewed	330878	cellular organisms, Eukaryota, Opisthokonta, Metazoa, Eumetazoa, Bilateria, Protostomia, Ecdysozoa, Panarthropoda, Arthropoda, Mandibulata, Pancrustacea, Hexapoda, Insecta, Dicondylia, Pterygota (winged insects), Neoptera, Holometabola, Diptera, Nematocera, Psychodomorpha, Psychodoidea, Psychodidae (sandflies and mothflies), Phlebotominae (sandflies), Nyssomyia, Nyssomyia neivai	Predicted	1 out of 5		Non-terminal residue (1)	GFDF01010374;				2017-03-15	2017-04-12
A0A1Q4JAR6	NZ_MRBQ01000155.1:1-622	100	157	0	0	121	591	1	157	7e-93	347.4	A0A1Q4JAR6	A0A1Q4JAR6_RHOER	unreviewed	Uncharacterized protein	BS618_33865	Rhodococcus erythropolis (Arthrobacter picolinophilus)	157	unreviewed	1833	cellular organisms, Bacteria, Terrabacteria group, Actinobacteria, Actinobacteria (high G+C Gram-positive bacteria), Corynebacteriales, Nocardiaceae, Rhodococcus, Rhodococcus erythropolis (Arthrobacter picolinophilus)	Predicted	1 out of 5	CAUTION: The sequence shown here is derived from an EMBL/GenBank/DDBJ whole genome shotgun (WGS) entry which is preliminary data. {ECO:0000313|EMBL:OKA04795.1}.	Domain (1)	MRBQ01000155;	WP_073513876.1;			2017-04-12	2017-06-07
A0A1Q8I4J2	NZ_MKPY01000072.1:126-297	96.08	51	2	0	153	1	1	51	4e-20	104.4	A0A1Q8I4J2	A0A1Q8I4J2_9NOCA	unreviewed	Uncharacterized protein (Fragment)	BKE56_028765	Rhodococcus sp. M8	83	unreviewed	1925550	cellular organisms, Bacteria, Terrabacteria group, Actinobacteria, Actinobacteria (high G+C Gram-positive bacteria), Corynebacteriales, Nocardiaceae, Rhodococcus, Rhodococcus sp. M8	Predicted	1 out of 5	CAUTION: The sequence shown here is derived from an EMBL/GenBank/DDBJ whole genome shotgun (WGS) entry which is preliminary data. {ECO:0000313|EMBL:OLL16022.1}.	Non-terminal residue (1)	MLYX02000007;	WP_072636915.1;			2017-04-12	2017-06-07
A0A1Q9ERE0	NZ_MOHL01000098.1:1-160	95.92	49	2	0	159	13	20	68	2e-25	122.1	A0A1Q9ERE0	A0A1Q9ERE0_SYMMI	unreviewed	Cleavage stimulation factor subunit 2	CSTF2 AK812_SmicGene6365	Symbiodinium microadriaticum (Dinoflagellate) (Zooxanthella microadriatica)	303	unreviewed	2951	cellular organisms, Eukaryota, Alveolata, Dinophyceae, Suessiales, Symbiodiniaceae, Symbiodinium, Symbiodinium microadriaticum (Dinoflagellate) (Zooxanthella microadriatica)	Predicted	1 out of 5	CAUTION: The sequence shown here is derived from an EMBL/GenBank/DDBJ whole genome shotgun (WGS) entry which is preliminary data. {ECO:0000313|EMBL:OLQ09961.1}.		LSRX01000087;				2017-04-12	2017-06-07
A0A1R0Z7G1	NZ_MPTW01000067.1:1-571	100	189	0	0	567	1	1	189	3e-112	411.4	A0A1R0Z7G1	A0A1R0Z7G1_9BACL	unreviewed	Uncharacterized protein (Fragment)	BSK65_30075	Paenibacillus odorifer	189	unreviewed	189426	cellular organisms, Bacteria, Terrabacteria group, Firmicutes, Bacilli, Bacillales, Paenibacillaceae, Paenibacillus, Paenibacillus odorifer	Predicted	1 out of 5	CAUTION: The sequence shown here is derived from an EMBL/GenBank/DDBJ whole genome shotgun (WGS) entry which is preliminary data. {ECO:0000313|EMBL:OME63428.1}.	Domain (1); Non-terminal residue (1)	MPTW01000067;	WP_076287120.1;			2017-04-12	2017-06-07
A0A1R1BNA5	NZ_MRTK01000180.1:1-252	100	80	0	0	1	240	1	80	4e-37	161	A0A1R1BNA5	A0A1R1BNA5_9BACL	unreviewed	Uncharacterized protein (Fragment)	BK133_30880	Paenibacillus sp. FSL H8-0548	80	unreviewed	1920422	cellular organisms, Bacteria, Terrabacteria group, Firmicutes, Bacilli, Bacillales, Paenibacillaceae, Paenibacillus, Paenibacillus sp. FSL H8-0548	Predicted	1 out of 5	CAUTION: The sequence shown here is derived from an EMBL/GenBank/DDBJ whole genome shotgun (WGS) entry which is preliminary data. {ECO:0000313|EMBL:OMF11377.1}.	Non-terminal residue (1)	MRTK01000180;				2017-04-12	2017-10-25
A0A1R1BS14	NZ_MRTK01000167.1:1-307	100	102	0	0	1	306	1	102	4e-50	204.5	A0A1R1BS14	A0A1R1BS14_9BACL	unreviewed	Uncharacterized protein (Fragment)	BK133_30830	Paenibacillus sp. FSL H8-0548	102	unreviewed	1920422	cellular organisms, Bacteria, Terrabacteria group, Firmicutes, Bacilli, Bacillales, Paenibacillaceae, Paenibacillus, Paenibacillus sp. FSL H8-0548	Predicted	1 out of 5	CAUTION: The sequence shown here is derived from an EMBL/GenBank/DDBJ whole genome shotgun (WGS) entry which is preliminary data. {ECO:0000313|EMBL:OMF12662.1}.	Non-terminal residue (2)	MRTK01000167;				2017-04-12	2017-06-07
A0A1R1C1L4	NZ_MRTK01000132.1:583-734	100	37	0	0	1	111	27	63	4e-14	84.3	A0A1R1C1L4	A0A1R1C1L4_9BACL	unreviewed	Uncharacterized protein	BK133_30695	Paenibacillus sp. FSL H8-0548	63	unreviewed	1920422	cellular organisms, Bacteria, Terrabacteria group, Firmicutes, Bacilli, Bacillales, Paenibacillaceae, Paenibacillus, Paenibacillus sp. FSL H8-0548	Predicted	1 out of 5	CAUTION: The sequence shown here is derived from an EMBL/GenBank/DDBJ whole genome shotgun (WGS) entry which is preliminary data. {ECO:0000313|EMBL:OMF15868.1}.		MRTK01000132;	WP_076340190.1;			2017-04-12	2017-06-07
A0A1R1C9P8	NZ_MRTL01000060.1:1-310	100	103	0	0	310	2	1	103	3e-52	211.5	A0A1R1C9P8	A0A1R1C9P8_9BACL	unreviewed	Uncharacterized protein (Fragment)	BK132_35525	Paenibacillus sp. FSL H8-0259	103	unreviewed	1920423	cellular organisms, Bacteria, Terrabacteria group, Firmicutes, Bacilli, Bacillales, Paenibacillaceae, Paenibacillus, Paenibacillus sp. FSL H8-0259	Predicted	1 out of 5	CAUTION: The sequence shown here is derived from an EMBL/GenBank/DDBJ whole genome shotgun (WGS) entry which is preliminary data. {ECO:0000313|EMBL:OMF18882.1}.	Coiled coil (1); Non-terminal residue (2)	MRTL01000060;				2017-04-12	2017-05-10
A0A1R1DBZ6	NZ_MRTO01000044.1:158-264	100	35	0	0	1	105	20	54	2e-11	75.5	A0A1R1DBZ6	A0A1R1DBZ6_PAEAM	unreviewed	Uncharacterized protein (Fragment)	BK136_30540	Paenibacillus amylolyticus	82	unreviewed	1451	cellular organisms, Bacteria, Terrabacteria group, Firmicutes, Bacilli, Bacillales, Paenibacillaceae, Paenibacillus, Paenibacillus amylolyticus	Predicted	1 out of 5	CAUTION: The sequence shown here is derived from an EMBL/GenBank/DDBJ whole genome shotgun (WGS) entry which is preliminary data. {ECO:0000313|EMBL:OMF37153.1}.	Non-terminal residue (1)	MRTO01000044;				2017-04-12	2017-04-12
A0A1R1DC33	NZ_MRTO01000050.1:44-213	100	45	0	0	170	36	22	66	2e-16	92	A0A1R1DC33	A0A1R1DC33_PAEAM	unreviewed	Uncharacterized protein	BK136_30580	Paenibacillus amylolyticus	66	unreviewed	1451	cellular organisms, Bacteria, Terrabacteria group, Firmicutes, Bacilli, Bacillales, Paenibacillaceae, Paenibacillus, Paenibacillus amylolyticus	Predicted	1 out of 5	CAUTION: The sequence shown here is derived from an EMBL/GenBank/DDBJ whole genome shotgun (WGS) entry which is preliminary data. {ECO:0000313|EMBL:OMF37144.1}.		MRTO01000050;	WP_076254992.1;			2017-04-12	2017-06-07
A0A1R1DC35	NZ_MRTO01000046.1:2-305	100	71	0	0	16	228	1	71	6e-32	144.1	A0A1R1DC35	A0A1R1DC35_PAEAM	unreviewed	Uncharacterized protein	BK136_30560	Paenibacillus amylolyticus	71	unreviewed	1451	cellular organisms, Bacteria, Terrabacteria group, Firmicutes, Bacilli, Bacillales, Paenibacillaceae, Paenibacillus, Paenibacillus amylolyticus	Predicted	1 out of 5	CAUTION: The sequence shown here is derived from an EMBL/GenBank/DDBJ whole genome shotgun (WGS) entry which is preliminary data. {ECO:0000313|EMBL:OMF37150.1}.		MRTO01000046;				2017-04-12	2017-07-05
A0A1T1GTM3	NZ_CMHG01000050.1:5-174	98.21	56	1	0	2	169	11	66	2e-24	118.6	A0A1T1GTM3	A0A1T1GTM3_OCELI	unreviewed	Uncharacterized protein (Fragment)	BTA35_0217110	Oceanospirillum linum	107	unreviewed	966	cellular organisms, Bacteria, Proteobacteria, Gammaproteobacteria, Oceanospirillales, Oceanospirillaceae, Oceanospirillum, Oceanospirillum linum	Predicted	1 out of 5	CAUTION: The sequence shown here is derived from an EMBL/GenBank/DDBJ whole genome shotgun (WGS) entry which is preliminary data. {ECO:0000313|EMBL:OOV80938.1}.	Non-terminal residue (1)	MTSD02000154;				2017-05-10	2018-02-28
A0A1T2KU45	NZ_MPRK01000332.1:310-539	100	76	0	0	230	3	24	99	2e-41	175.6	A0A1T2KU45	A0A1T2KU45_9GAMM	unreviewed	Uncharacterized protein	BOW52_10820	Solemya pervernicosa gill symbiont	132	unreviewed	642797	cellular organisms, Bacteria, Proteobacteria, Gammaproteobacteria, unclassified Gammaproteobacteria, sulfur-oxidizing symbionts, Solemya pervernicosa gill symbiont	Predicted	1 out of 5	CAUTION: The sequence shown here is derived from an EMBL/GenBank/DDBJ whole genome shotgun (WGS) entry which is preliminary data. {ECO:0000313|EMBL:OOZ36379.1}.		MPRK01000332;				2017-05-10	2017-08-30
A0A1T2KUB4	NZ_PJAI01000113.1:102-277	100	34	0	0	75	176	1	34	2e-12	78.6	A0A1T2KUB4	A0A1T2KUB4_9GAMM	unreviewed	Uncharacterized protein	BOW52_10830	Solemya pervernicosa gill symbiont	65	unreviewed	642797	cellular organisms, Bacteria, Proteobacteria, Gammaproteobacteria, unclassified Gammaproteobacteria, sulfur-oxidizing symbionts, Solemya pervernicosa gill symbiont	Predicted	1 out of 5	CAUTION: The sequence shown here is derived from an EMBL/GenBank/DDBJ whole genome shotgun (WGS) entry which is preliminary data. {ECO:0000313|EMBL:OOZ36381.1}.		MPRK01000332;	WP_021666093.1;			2017-05-10	2017-08-30
A0A1T2KUH5	NZ_KZ794899.1:444-612	97.96	49	1	0	21	167	1	49	8e-21	106.7	A0A1T2KUH5	A0A1T2KUH5_9GAMM	unreviewed	Uncharacterized protein	BOW52_10825	Solemya pervernicosa gill symbiont	115	unreviewed	642797	cellular organisms, Bacteria, Proteobacteria, Gammaproteobacteria, unclassified Gammaproteobacteria, sulfur-oxidizing symbionts, Solemya pervernicosa gill symbiont	Predicted	1 out of 5	CAUTION: The sequence shown here is derived from an EMBL/GenBank/DDBJ whole genome shotgun (WGS) entry which is preliminary data. {ECO:0000313|EMBL:OOZ36380.1}.		MPRK01000332;	WP_021739601.1;			2017-05-10	2017-08-30
A0A1V2SBX8	NZ_MSRF01000231.1:454-886	98.75	80	1	0	390	151	1	80	2e-29	135.6	A0A1V2SBX8	A0A1V2SBX8_9BACI	unreviewed	Uncharacterized protein	BLX87_16930	Bacillus sp. VT-16-64	80	unreviewed	1917019	cellular organisms, Bacteria, Terrabacteria group, Firmicutes, Bacilli, Bacillales, Bacillaceae, Bacillus, Bacillus sp. VT-16-64	Predicted	1 out of 5	CAUTION: The sequence shown here is derived from an EMBL/GenBank/DDBJ whole genome shotgun (WGS) entry which is preliminary data. {ECO:0000313|EMBL:ONK22304.1}.	Domain (1)	MSRF01000231;				2017-06-07	2017-11-22
A0A1V2SCS9	NZ_MSRF01000225.1:1233-1621	100	53	0	0	1	159	12	64	1e-23	116.7	A0A1V2SCS9	A0A1V2SCS9_9BACI	unreviewed	Uncharacterized protein	BLX87_16665	Bacillus sp. VT-16-64	64	unreviewed	1917019	cellular organisms, Bacteria, Terrabacteria group, Firmicutes, Bacilli, Bacillales, Bacillaceae, Bacillus, Bacillus sp. VT-16-64	Predicted	1 out of 5	CAUTION: The sequence shown here is derived from an EMBL/GenBank/DDBJ whole genome shotgun (WGS) entry which is preliminary data. {ECO:0000313|EMBL:ONK22348.1}.		MSRF01000225;	WP_077113014.1;			2017-06-07	2017-08-30
A0A1V2SH44	NZ_MSRF01000134.1:7-303	98.65	74	1	0	223	2	1	74	1e-35	156	A0A1V2SH44	A0A1V2SH44_9BACI	unreviewed	Uncharacterized protein (Fragment)	BLX87_09050	Bacillus sp. VT-16-64	76	unreviewed	1917019	cellular organisms, Bacteria, Terrabacteria group, Firmicutes, Bacilli, Bacillales, Bacillaceae, Bacillus, Bacillus sp. VT-16-64	Predicted	1 out of 5	CAUTION: The sequence shown here is derived from an EMBL/GenBank/DDBJ whole genome shotgun (WGS) entry which is preliminary data. {ECO:0000313|EMBL:ONK23736.1}.	Non-terminal residue (1)	MSRF01000134;				2017-06-07	2017-08-30
A0A1V4AGT9	NZ_MUHX01000142.1:1-225	100	74	0	0	3	224	1	74	6e-36	157.1	A0A1V4AGT9	A0A1V4AGT9_9BACT	unreviewed	Uncharacterized protein (Fragment)	B0D78_12475	Pyramidobacter sp. C12-8	74	unreviewed	1943580	cellular organisms, Bacteria, Synergistetes, Synergistia, Synergistales, Synergistaceae, Pyramidobacter, Pyramidobacter sp. C12-8	Predicted	1 out of 5	CAUTION: The sequence shown here is derived from an EMBL/GenBank/DDBJ whole genome shotgun (WGS) entry which is preliminary data. {ECO:0000313|EMBL:OON84721.1}.	Non-terminal residue (2)	MUHX01000142;				2017-06-07	2017-10-25
A0A1V4AHG3	NZ_MUHX01000082.1:209-379	100	56	0	0	3	170	71	126	2e-26	125.6	A0A1V4AHG3	A0A1V4AHG3_9BACT	unreviewed	Uncharacterized protein (Fragment)	B0D78_12265	Pyramidobacter sp. C12-8	136	unreviewed	1943580	cellular organisms, Bacteria, Synergistetes, Synergistia, Synergistales, Synergistaceae, Pyramidobacter, Pyramidobacter sp. C12-8	Predicted	1 out of 5	CAUTION: The sequence shown here is derived from an EMBL/GenBank/DDBJ whole genome shotgun (WGS) entry which is preliminary data. {ECO:0000313|EMBL:OON85410.1}.	Non-terminal residue (1)	MUHX01000082;				2017-06-07	2017-06-07
A0A1V4T072	NZ_MTSM01000143.1:1-494	100	108	0	0	119	442	1	108	5e-56	224.2	A0A1V4T072	A0A1V4T072_9GAMM	unreviewed	Uncharacterized protein	BTE48_16580	Oceanospirillum multiglobuliferum	114	unreviewed	64969	cellular organisms, Bacteria, Proteobacteria, Gammaproteobacteria, Oceanospirillales, Oceanospirillaceae, Oceanospirillum, Oceanospirillum multiglobuliferum	Predicted	1 out of 5	CAUTION: The sequence shown here is derived from an EMBL/GenBank/DDBJ whole genome shotgun (WGS) entry which is preliminary data. {ECO:0000313|EMBL:OPX53991.1}.		MTSM01000143;				2017-06-07	2018-02-28
A0A1V4T0B1	NZ_MTSM01000098.1:244-618	100	123	0	0	6	374	1	123	9e-70	269.6	A0A1V4T0B1	A0A1V4T0B1_9GAMM	unreviewed	Uncharacterized protein (Fragment)	BTE48_16365	Oceanospirillum multiglobuliferum	127	unreviewed	64969	cellular organisms, Bacteria, Proteobacteria, Gammaproteobacteria, Oceanospirillales, Oceanospirillaceae, Oceanospirillum, Oceanospirillum multiglobuliferum	Predicted	1 out of 5	CAUTION: The sequence shown here is derived from an EMBL/GenBank/DDBJ whole genome shotgun (WGS) entry which is preliminary data. {ECO:0000313|EMBL:OPX54032.1}.	Non-terminal residue (1)	MTSM01000098;				2017-06-07	2018-02-28
A0A1V4T0F4	NZ_MTSM01000061.1:243-860	98.94	94	1	0	566	285	1	94	4e-45	188.7	A0A1V4T0F4	A0A1V4T0F4_9GAMM	unreviewed	Uncharacterized protein	BTE48_16160	Oceanospirillum multiglobuliferum	94	unreviewed	64969	cellular organisms, Bacteria, Proteobacteria, Gammaproteobacteria, Oceanospirillales, Oceanospirillaceae, Oceanospirillum, Oceanospirillum multiglobuliferum	Predicted	1 out of 5	CAUTION: The sequence shown here is derived from an EMBL/GenBank/DDBJ whole genome shotgun (WGS) entry which is preliminary data. {ECO:0000313|EMBL:OPX54071.1}.	Coiled coil (1)	MTSM01000061;				2017-06-07	2018-02-28
A0A1V4T1D6	NZ_MTSM01000121.1:25-512	100	161	0	0	487	5	13	173	3e-84	317.8	A0A1V4T1D6	A0A1V4T1D6_9GAMM	unreviewed	Uncharacterized protein	BTE48_16485	Oceanospirillum multiglobuliferum	173	unreviewed	64969	cellular organisms, Bacteria, Proteobacteria, Gammaproteobacteria, Oceanospirillales, Oceanospirillaceae, Oceanospirillum, Oceanospirillum multiglobuliferum	Predicted	1 out of 5	CAUTION: The sequence shown here is derived from an EMBL/GenBank/DDBJ whole genome shotgun (WGS) entry which is preliminary data. {ECO:0000313|EMBL:OPX54009.1}.	Coiled coil (1); Domain (1)	MTSM01000121;				2017-06-07	2018-09-12
A0A1V4T1K7	NZ_MTSM01000062.1:1-650	99.39	165	1	0	135	629	1	165	9e-96	357.1	A0A1V4T1K7	A0A1V4T1K7_9GAMM	unreviewed	Uncharacterized protein	BTE48_16165	Oceanospirillum multiglobuliferum	165	unreviewed	64969	cellular organisms, Bacteria, Proteobacteria, Gammaproteobacteria, Oceanospirillales, Oceanospirillaceae, Oceanospirillum, Oceanospirillum multiglobuliferum	Predicted	1 out of 5	CAUTION: The sequence shown here is derived from an EMBL/GenBank/DDBJ whole genome shotgun (WGS) entry which is preliminary data. {ECO:0000313|EMBL:OPX54069.1}.	Domain (1)	MTSM01000062;				2017-06-07	2018-02-28
A0A1V9UAA6	NZ_ALQR01000038.1:907-4200	99.24	262	2	0	1	786	1	262	7e-130	474.2	A0A1V9UAA6	A0A1V9UAA6_9PSED	unreviewed	Endonuclease (Fragment)	BWR15_30755	Pseudomonas sp. T	262	unreviewed	1938440	cellular organisms, Bacteria, Proteobacteria, Gammaproteobacteria, Pseudomonadales, Pseudomonadaceae, Pseudomonas, Pseudomonas sp. T	Predicted	1 out of 5	CAUTION: The sequence shown here is derived from an EMBL/GenBank/DDBJ whole genome shotgun (WGS) entry which is preliminary data. {ECO:0000313|EMBL:OQR26822.1}.	Domain (1); Non-terminal residue (1); Sequence uncertainty (2)	MUHV01000031;				2017-06-07	2017-10-25
A0A1V9UAH9	NZ_FECI01000023.1:290-451	100	53	0	0	161	3	45	97	3e-21	108.2	A0A1V9UAH9	A0A1V9UAH9_9PSED	unreviewed	Uncharacterized protein (Fragment)	BWR15_30695	Pseudomonas sp. T	112	unreviewed	1938440	cellular organisms, Bacteria, Proteobacteria, Gammaproteobacteria, Pseudomonadales, Pseudomonadaceae, Pseudomonas, Pseudomonas sp. T	Predicted	1 out of 5	CAUTION: The sequence shown here is derived from an EMBL/GenBank/DDBJ whole genome shotgun (WGS) entry which is preliminary data. {ECO:0000313|EMBL:OQR26927.1}.	Non-terminal residue (1)	MUHV01000022;				2017-06-07	2017-07-05
A0A1V9UAI7	NZ_AKPL01000008.1:1-2797	99.85	647	1	0	857	2797	1	647	0	1172.5	A0A1V9UAI7	A0A1V9UAI7_9PSED	unreviewed	Endonuclease (Fragment)	BWR15_30690	Pseudomonas sp. T	819	unreviewed	1938440	cellular organisms, Bacteria, Proteobacteria, Gammaproteobacteria, Pseudomonadales, Pseudomonadaceae, Pseudomonas, Pseudomonas sp. T	Predicted	1 out of 5	CAUTION: The sequence shown here is derived from an EMBL/GenBank/DDBJ whole genome shotgun (WGS) entry which is preliminary data. {ECO:0000313|EMBL:OQR26928.1}.	Domain (1); Non-terminal residue (2); Sequence uncertainty (2)	MUHV01000021;				2017-06-07	2017-11-22
A0A1W0VL10	NZ_MTLF01000122.1:64-233	100	42	0	0	1	126	22	63	1e-15	89.4	A0A1W0VL10	A0A1W0VL10_HELPX	unreviewed	Uncharacterized protein (Fragment)	BW246_08475	Helicobacter pylori (Campylobacter pylori)	64	unreviewed	210	cellular organisms, Bacteria, Proteobacteria, delta/epsilon subdivisions, Epsilonproteobacteria, Campylobacterales, Helicobacteraceae, Helicobacter, Helicobacter pylori (Campylobacter pylori)	Predicted	1 out of 5	CAUTION: The sequence shown here is derived from an EMBL/GenBank/DDBJ whole genome shotgun (WGS) entry which is preliminary data. {ECO:0000313|EMBL:OQU74024.1}.	Non-terminal residue (1)	MTLF01000122;				2017-06-07	2017-07-05
A0A1W9YMP6	NZ_MVHE01000471.1:1-229	100	76	0	0	2	229	1	76	1e-32	146	A0A1W9YMP6	A0A1W9YMP6_9MYCO	unreviewed	Uncharacterized protein (Fragment)	BST12_30320	Mycobacterium angelicum	76	unreviewed	470074	cellular organisms, Bacteria, Terrabacteria group, Actinobacteria, Actinobacteria (high G+C Gram-positive bacteria), Corynebacteriales, Mycobacteriaceae, Mycobacterium, Mycobacterium angelicum	Predicted	1 out of 5	CAUTION: The sequence shown here is derived from an EMBL/GenBank/DDBJ whole genome shotgun (WGS) entry which is preliminary data. {ECO:0000313|EMBL:ORA01305.1}.	Domain (1); Non-terminal residue (2)	MVHE01000471;				2017-07-05	2017-11-22
A0A1W9YNA0	NZ_MVHE01000420.1:1-255	100	84	0	0	2	253	1	84	6e-41	173.7	A0A1W9YNA0	A0A1W9YNA0_9MYCO	unreviewed	Uncharacterized protein (Fragment)	BST12_30105	Mycobacterium angelicum	85	unreviewed	470074	cellular organisms, Bacteria, Terrabacteria group, Actinobacteria, Actinobacteria (high G+C Gram-positive bacteria), Corynebacteriales, Mycobacteriaceae, Mycobacterium, Mycobacterium angelicum	Predicted	1 out of 5	CAUTION: The sequence shown here is derived from an EMBL/GenBank/DDBJ whole genome shotgun (WGS) entry which is preliminary data. {ECO:0000313|EMBL:ORA01541.1}.	Domain (1); Non-terminal residue (2)	MVHE01000420;				2017-07-05	2017-11-22
A0A1W9YR37	NZ_MVHE01000372.1:1-299	100	72	0	0	217	2	1	72	3e-39	168.3	A0A1W9YR37	A0A1W9YR37_9MYCO	unreviewed	Uncharacterized protein (Fragment)	BST12_29865	Mycobacterium angelicum	72	unreviewed	470074	cellular organisms, Bacteria, Terrabacteria group, Actinobacteria, Actinobacteria (high G+C Gram-positive bacteria), Corynebacteriales, Mycobacteriaceae, Mycobacterium, Mycobacterium angelicum	Predicted	1 out of 5	CAUTION: The sequence shown here is derived from an EMBL/GenBank/DDBJ whole genome shotgun (WGS) entry which is preliminary data. {ECO:0000313|EMBL:ORA02449.1}.	Non-terminal residue (1)	MVHE01000372;				2017-07-05	2017-10-25
A0A1X2CWD7	NZ_LQPU01000030.1:415-1039	100	139	0	0	207	623	1	139	3e-82	312	A0A1X2CWD7	A0A1X2CWD7_MYCSH	unreviewed	Uncharacterized protein (Fragment)	AWC26_12420	Mycobacterium shimoidei	140	unreviewed	29313	cellular organisms, Bacteria, Terrabacteria group, Actinobacteria, Actinobacteria (high G+C Gram-positive bacteria), Corynebacteriales, Mycobacteriaceae, Mycobacterium, Mycobacterium shimoidei	Predicted	1 out of 5	CAUTION: The sequence shown here is derived from an EMBL/GenBank/DDBJ whole genome shotgun (WGS) entry which is preliminary data. {ECO:0000313|EMBL:ORW80245.1}.	Domain (1); Non-terminal residue (1)	LQPU01000030;				2017-07-05	2017-08-30
A0A1X3K4L0	NZ_ADJX01000027.1:1-505	100	83	0	0	251	3	1	83	2e-38	165.6	A0A1X3K4L0	A0A1X3K4L0_ECOLX	unreviewed	Uncharacterized protein (Fragment)	EATG_04242	Escherichia coli H605	83	unreviewed	656410	cellular organisms, Bacteria, Proteobacteria, Gammaproteobacteria, Enterobacterales, Enterobacteriaceae, Escherichia, Escherichia coli, Escherichia coli H605	Predicted	1 out of 5	CAUTION: The sequence shown here is derived from an EMBL/GenBank/DDBJ whole genome shotgun (WGS) entry which is preliminary data. {ECO:0000313|EMBL:OSL42229.1}.	Coiled coil (1); Non-terminal residue (1)	ADJX01000027;				2017-07-05	2018-06-20
A0A1X3K551	NZ_ADJX01000028.1:267-505	98.67	75	1	0	227	3	1	75	4e-37	161	A0A1X3K551	A0A1X3K551_ECOLX	unreviewed	Uncharacterized protein	EATG_04244	Escherichia coli H605	91	unreviewed	656410	cellular organisms, Bacteria, Proteobacteria, Gammaproteobacteria, Enterobacterales, Enterobacteriaceae, Escherichia, Escherichia coli, Escherichia coli H605	Predicted	1 out of 5	CAUTION: The sequence shown here is derived from an EMBL/GenBank/DDBJ whole genome shotgun (WGS) entry which is preliminary data. {ECO:0000313|EMBL:OSL42226.1}.		ADJX01000028;				2017-07-05	2018-06-20
A0A1X3K7C5	NZ_ADJX01000020.1:1-918	100	133	0	0	401	3	6	138	2e-72	280.8	A0A1X3K7C5	A0A1X3K7C5_ECOLX	unreviewed	Uncharacterized protein (Fragment)	EATG_04237	Escherichia coli H605	138	unreviewed	656410	cellular organisms, Bacteria, Proteobacteria, Gammaproteobacteria, Enterobacterales, Enterobacteriaceae, Escherichia, Escherichia coli, Escherichia coli H605	Predicted	1 out of 5	CAUTION: The sequence shown here is derived from an EMBL/GenBank/DDBJ whole genome shotgun (WGS) entry which is preliminary data. {ECO:0000313|EMBL:OSL43037.1}.	Non-terminal residue (1)	ADJX01000020;				2017-07-05	2018-06-20
A0A1X6RM95	NZ_FQLM01000003.1:4122-5041	96.19	236	9	0	918	211	136	371	2e-125	456.8	A0A1X6RM95	A0A1X6RM95_CHLAO	unreviewed	L1 transposable element	SAMEA1527889_02369	Chlamydia abortus (Chlamydophila abortus)	371	unreviewed	83555	cellular organisms, Bacteria, PVC group, Chlamydiae, Chlamydiia, Chlamydiales, Chlamydiaceae, Chlamydia/Chlamydophila group, Chlamydia, Chlamydia abortus (Chlamydophila abortus)	Predicted	1 out of 5		Coiled coil (4); Domain (2)	FPIG01000087;				2017-07-05	2018-09-12
A0A1X6RMN5	NZ_CVNI01000002.1:672-1352	99.36	156	1	0	211	678	1	156	9e-90	337.4	A0A1X6RMN5	A0A1X6RMN5_CHLAO	unreviewed	Retron-type reverse transcriptase	SAMEA1527889_02401	Chlamydia abortus (Chlamydophila abortus)	156	unreviewed	83555	cellular organisms, Bacteria, PVC group, Chlamydiae, Chlamydiia, Chlamydiales, Chlamydiaceae, Chlamydia/Chlamydophila group, Chlamydia, Chlamydia abortus (Chlamydophila abortus)	Predicted	1 out of 5		Domain (1)	FPIG01000133;				2017-07-05	2018-09-12
A0A1X6S848	NZ_FPLU01000003.1:1121-4095	100	75	0	0	2638	2862	1	75	5e-34	155.6	A0A1X6S848	A0A1X6S848_CHLAO	unreviewed	Uncharacterized protein	SAMEA1094337_00035	Chlamydia abortus (Chlamydophila abortus)	75	unreviewed	83555	cellular organisms, Bacteria, PVC group, Chlamydiae, Chlamydiia, Chlamydiales, Chlamydiaceae, Chlamydia/Chlamydophila group, Chlamydia, Chlamydia abortus (Chlamydophila abortus)	Predicted	1 out of 5			FPLT01000002;				2017-07-05	2017-08-30
A0A1X6S8E5	NZ_FPLU01000005.1:328-1665	100	338	0	0	155	1168	1	338	3e-175	623.2	A0A1X6S8E5	A0A1X6S8E5_CHLAO	unreviewed	L1 transposable element	SAMEA1094337_00036 SAMEA1094346_02069	Chlamydia abortus (Chlamydophila abortus)	338	unreviewed	83555	cellular organisms, Bacteria, PVC group, Chlamydiae, Chlamydiia, Chlamydiales, Chlamydiaceae, Chlamydia/Chlamydophila group, Chlamydia, Chlamydia abortus (Chlamydophila abortus)	Predicted	1 out of 5		Coiled coil (1); Domain (2)	FPLQ01000015;FPLT01000002;				2018-09-12	2018-10-10
A0A1X6UHW6	NZ_FPMM01000013.1:64-707	100	95	0	0	335	619	1	95	1e-46	193.7	A0A1X6UHW6	A0A1X6UHW6_CHLAO	unreviewed	Uncharacterized protein	SAMEA1527889_02273	Chlamydia abortus (Chlamydophila abortus)	95	unreviewed	83555	cellular organisms, Bacteria, PVC group, Chlamydiae, Chlamydiia, Chlamydiales, Chlamydiaceae, Chlamydia/Chlamydophila group, Chlamydia, Chlamydia abortus (Chlamydophila abortus)	Predicted	1 out of 5			FPIG01000050;				2017-07-05	2018-09-12
A0A1Y3M5Q7	NZ_MWPX01000113.1:630-2078	100	483	0	0	1449	1	1	483	7e-284	984.2	A0A1Y3M5Q7	A0A1Y3M5Q7_9BACI	unreviewed	Endonuclease (Fragment)	BW425_27675	Bacillus pseudomycoides	660	unreviewed	64104	cellular organisms, Bacteria, Terrabacteria group, Firmicutes, Bacilli, Bacillales, Bacillaceae, Bacillus, Bacillus cereus group, Bacillus pseudomycoides	Predicted	1 out of 5	CAUTION: The sequence shown here is derived from an EMBL/GenBank/DDBJ whole genome shotgun (WGS) entry which is preliminary data. {ECO:0000313|EMBL:OUM45767.1}.	Domain (1); Non-terminal residue (1)	MWPX01000113;				2017-08-30	2017-10-25
A0A211YSJ4	NZ_CKCF01000051.1:903-1626	100	200	0	0	82	681	1	200	1e-106	393.7	A0A211YSJ4	A0A211YSJ4_9BURK	unreviewed	Uncharacterized protein	BWU74_32880	Burkholderia sp. Bk	200	unreviewed	1938441	cellular organisms, Bacteria, Proteobacteria, Betaproteobacteria, Burkholderiales, Burkholderiaceae, Burkholderia, Burkholderia sp. Bk	Predicted	1 out of 5	CAUTION: The sequence shown here is derived from an EMBL/GenBank/DDBJ whole genome shotgun (WGS) entry which is preliminary data. {ECO:0000313|EMBL:OWJ55894.1}.	Domain (1)	NHOM01000038;				2017-10-25	2018-01-31
A0A229SJH5	NZ_NMUL01000163.1:61-202	100	47	0	0	1	141	20	66	7e-20	103.6	A0A229SJH5	A0A229SJH5_9PSEU	unreviewed	Uncharacterized protein (Fragment)	CF165_49885	Amycolatopsis sp. H5	66	unreviewed	1905142	cellular organisms, Bacteria, Terrabacteria group, Actinobacteria, Actinobacteria (high G+C Gram-positive bacteria), Pseudonocardiales, Pseudonocardiaceae, Amycolatopsis, Amycolatopsis sp. H5	Predicted	1 out of 5	CAUTION: The sequence shown here is derived from an EMBL/GenBank/DDBJ whole genome shotgun (WGS) entry which is preliminary data. {ECO:0000313|EMBL:OXM58993.1}.	Non-terminal residue (1)	NMUL01000163;				2017-10-25	2018-01-31
A0A231VNK6	NZ_NGVM01000410.1:1-209	100	69	0	0	208	2	1	69	1e-31	142.5	A0A231VNK6	A0A231VNK6_9STRE	unreviewed	Uncharacterized protein (Fragment)	CBI42_12430	Streptococcus sp. KR	69	unreviewed	1979528	cellular organisms, Bacteria, Terrabacteria group, Firmicutes, Bacilli, Lactobacillales, Streptococcaceae, Streptococcus, Streptococcus sp. KR	Predicted	1 out of 5	CAUTION: The sequence shown here is derived from an EMBL/GenBank/DDBJ whole genome shotgun (WGS) entry which is preliminary data. {ECO:0000313|EMBL:OXT09617.1}.	Non-terminal residue (2)	NGVM01000410;				2017-10-25	2017-11-22
A0A235B153	NZ_NOWF01000113.1:1-304	100	101	0	0	1	303	1	101	1e-48	199.5	A0A235B153	A0A235B153_9BACL	unreviewed	Uncharacterized protein (Fragment)	CHM34_18560	Paludifilum halophilum	108	unreviewed	1642702	cellular organisms, Bacteria, Terrabacteria group, Firmicutes, Bacilli, Bacillales, Thermoactinomycetaceae, Paludifilum, Paludifilum halophilum	Predicted	1 out of 5	CAUTION: The sequence shown here is derived from an EMBL/GenBank/DDBJ whole genome shotgun (WGS) entry which is preliminary data. {ECO:0000313|EMBL:OYD06020.1}.	Non-terminal residue (1)	NOWF01000113;				2017-10-25	2018-02-28
A0A235B1D2	NZ_NOWF01000055.1:149-316	100	56	0	0	168	1	2	57	1e-22	112.5	A0A235B1D2	A0A235B1D2_9BACL	unreviewed	Uncharacterized protein	CHM34_18370	Paludifilum halophilum	60	unreviewed	1642702	cellular organisms, Bacteria, Terrabacteria group, Firmicutes, Bacilli, Bacillales, Thermoactinomycetaceae, Paludifilum, Paludifilum halophilum	Predicted	1 out of 5	CAUTION: The sequence shown here is derived from an EMBL/GenBank/DDBJ whole genome shotgun (WGS) entry which is preliminary data. {ECO:0000313|EMBL:OYD06052.1}.		NOWF01000055;				2017-10-25	2018-01-31
A0A246F2Y5	NZ_NJBA01000097.1:107-409	100	101	0	0	1	303	33	133	4e-41	174.5	A0A246F2Y5	A0A246F2Y5_9PSED	unreviewed	Uncharacterized protein (Fragment)	CEG18_29315	Pseudomonas nitroreducens	133	unreviewed	46680	cellular organisms, Bacteria, Proteobacteria, Gammaproteobacteria, Pseudomonadales, Pseudomonadaceae, Pseudomonas, Pseudomonas aeruginosa group, Pseudomonas nitroreducens/multiresinivorans group, Pseudomonas nitroreducens	Predicted	1 out of 5	CAUTION: The sequence shown here is derived from an EMBL/GenBank/DDBJ whole genome shotgun (WGS) entry which is preliminary data. {ECO:0000313|EMBL:OWP39378.1}.	Non-terminal residue (1)	NJBA01000097;				2017-10-25	2017-10-25
A0A251XBP0	NZ_MSLT01000005.1:661-1818	100	295	0	0	1035	151	1	295	3e-174	619.4	A0A251XBP0	A0A251XBP0_9GAMM	unreviewed	Uncharacterized protein	TPSD3_01370	Thioflexothrix psekupsii	295	unreviewed	1570016	cellular organisms, Bacteria, Proteobacteria, Gammaproteobacteria, Thiotrichales, unclassified Thiotrichales, Thioflexothrix, Thioflexothrix psekupsii	Predicted	1 out of 5	CAUTION: The sequence shown here is derived from an EMBL/GenBank/DDBJ whole genome shotgun (WGS) entry which is preliminary data. {ECO:0000313|EMBL:OUD15859.1}.		MSLT01000005;				2017-11-22	2018-01-31
A0A255S3Z9	NZ_NPJD01000084.1:106-247	100	40	0	0	19	138	1	40	4e-15	87.8	A0A255S3Z9	A0A255S3Z9_9BACT	unreviewed	Uncharacterized protein (Fragment)	CIK97_11835	Prevotella sp. P3-120	60	unreviewed	2024220	cellular organisms, Bacteria, FCB group, Bacteroidetes/Chlorobi group, Bacteroidetes, Bacteroidia, Bacteroidales, Prevotellaceae, Prevotella, Prevotella sp. P3-120	Predicted	1 out of 5	CAUTION: The sequence shown here is derived from an EMBL/GenBank/DDBJ whole genome shotgun (WGS) entry which is preliminary data. {ECO:0000313|EMBL:OYP47694.1}.	Non-terminal residue (1)	NPJD01000084;				2017-12-20	2018-02-28
A0A264T3Y9	NZ_NOIF01000477.1:1-415	100	138	0	0	415	2	1	138	6e-75	287	A0A264T3Y9	A0A264T3Y9_9GAMM	unreviewed	Uncharacterized protein (Fragment)	ASV53_24685	Photobacterium sanguinicancri	138	unreviewed	875932	cellular organisms, Bacteria, Proteobacteria, Gammaproteobacteria, Vibrionales, Vibrionaceae, Photobacterium, Photobacterium sanguinicancri	Predicted	1 out of 5	CAUTION: The sequence shown here is derived from an EMBL/GenBank/DDBJ whole genome shotgun (WGS) entry which is preliminary data. {ECO:0000313|EMBL:OZS41277.1}.	Non-terminal residue (2)	NOIF01000477;				2017-12-20	2017-12-20
A0A265N4K3	NZ_NPMS01000028.1:147-367	100	73	0	0	221	3	3	75	8e-35	153.3	A0A265N4K3	A0A265N4K3_9BACI	unreviewed	Uncharacterized protein	CIL03_19310	Virgibacillus indicus	75	unreviewed	2024554	cellular organisms, Bacteria, Terrabacteria group, Firmicutes, Bacilli, Bacillales, Bacillaceae, Virgibacillus, Virgibacillus indicus	Predicted	1 out of 5	CAUTION: The sequence shown here is derived from an EMBL/GenBank/DDBJ whole genome shotgun (WGS) entry which is preliminary data. {ECO:0000313|EMBL:OZU86970.1}.		NPMS01000028;				2017-12-20	2018-06-20
A0A265N6C6	NZ_MKPY01000072.1:126-297	96.08	51	2	0	153	1	1	51	4e-20	104.4	A0A265N6C6	A0A265N6C6_9BACI	unreviewed	Uncharacterized protein	CIL03_19315	Virgibacillus indicus	108	unreviewed	2024554	cellular organisms, Bacteria, Terrabacteria group, Firmicutes, Bacilli, Bacillales, Bacillaceae, Virgibacillus, Virgibacillus indicus	Predicted	1 out of 5	CAUTION: The sequence shown here is derived from an EMBL/GenBank/DDBJ whole genome shotgun (WGS) entry which is preliminary data. {ECO:0000313|EMBL:OZU86969.1}.		NPMS01000029;				2017-12-20	2018-06-20
A0A269TKF5	NZ_QLAN01000102.1:85-854	99.36	157	1	0	693	223	1	157	1e-91	344	A0A269TKF5	A0A269TKF5_9ACTN	unreviewed	Uncharacterized protein	CJD44_39335	Streptomyces sp. alain-838	157	unreviewed	2026340	cellular organisms, Bacteria, Terrabacteria group, Actinobacteria, Actinobacteria (high G+C Gram-positive bacteria), Streptomycetales, Streptomycetaceae, Streptomyces, Streptomyces sp. alain-838	Predicted	1 out of 5	CAUTION: The sequence shown here is derived from an EMBL/GenBank/DDBJ whole genome shotgun (WGS) entry which is preliminary data. {ECO:0000313|EMBL:PAK21861.1}.	Domain (1)	NQNW01000509;				2017-12-20	2018-01-31
A0A270AGP0	NZ_NCXF01000081.1:1-336	99.09	110	1	0	6	335	1	110	1e-54	219.5	A0A270AGP0	A0A270AGP0_9GAMM	unreviewed	Uncharacterized protein (Fragment)	B8W92_11605	Moraxella osloensis	110	unreviewed	34062	cellular organisms, Bacteria, Proteobacteria, Gammaproteobacteria, Pseudomonadales, Moraxellaceae, Moraxella, Moraxella osloensis	Predicted	1 out of 5	CAUTION: The sequence shown here is derived from an EMBL/GenBank/DDBJ whole genome shotgun (WGS) entry which is preliminary data. {ECO:0000313|EMBL:PAL11904.1}.	Domain (1); Non-terminal residue (1)	NCXF01000081;				2017-12-20	2018-09-12
A0A270AJF0	NZ_NCXF01000048.1:183-842	100	150	0	0	211	660	1	150	1e-89	336.7	A0A270AJF0	A0A270AJF0_9GAMM	unreviewed	Uncharacterized protein (Fragment)	B8W92_11480	Moraxella osloensis	150	unreviewed	34062	cellular organisms, Bacteria, Proteobacteria, Gammaproteobacteria, Pseudomonadales, Moraxellaceae, Moraxella, Moraxella osloensis	Predicted	1 out of 5	CAUTION: The sequence shown here is derived from an EMBL/GenBank/DDBJ whole genome shotgun (WGS) entry which is preliminary data. {ECO:0000313|EMBL:PAL12560.1}.	Domain (1); Non-terminal residue (1)	NCXF01000048;				2017-12-20	2018-01-31
A0A270QKY0	NZ_NQOS01000622.1:1-295	100	90	0	0	270	1	1	90	1e-50	205.7	A0A270QKY0	A0A270QKY0_9ACTN	unreviewed	Uncharacterized protein (Fragment)	CJI59_38075	Streptomyces sp. Alain-F2R5	90	unreviewed	2026341	cellular organisms, Bacteria, Terrabacteria group, Actinobacteria, Actinobacteria (high G+C Gram-positive bacteria), Streptomycetales, Streptomycetaceae, Streptomyces, Streptomyces sp. Alain-F2R5	Predicted	1 out of 5	CAUTION: The sequence shown here is derived from an EMBL/GenBank/DDBJ whole genome shotgun (WGS) entry which is preliminary data. {ECO:0000313|EMBL:PAM96908.1}.	Non-terminal residue (1)	NQOS01000622;				2017-12-20	2017-12-20
A0A287HR83	NZ_FECI01000023.1:290-451	98.11	53	1	0	161	3	45	97	5e-24	117.5	A0A287HR83	A0A287HR83_HORVV	unreviewed	Uncharacterized protein		Hordeum vulgare subsp. vulgare (Domesticated barley)	127	unreviewed	112509	cellular organisms, Eukaryota, Viridiplantae, Streptophyta, Streptophytina, Embryophyta, Tracheophyta, Euphyllophyta, Spermatophyta, Magnoliophyta, Mesangiospermae, Liliopsida, Petrosaviidae, commelinids, Poales, Poaceae, BOP clade, Pooideae, Triticodae, Triticeae, Hordeinae, Hordeum, Hordeum vulgare (Barley), Hordeum vulgare subsp. vulgare (Domesticated barley)	Predicted	1 out of 5							2017-11-22	2017-11-22
A0A287IB17	NZ_LZSF01000266.1:234-403	98.21	56	1	0	1	168	40	95	4e-27	127.5	A0A287IB17	A0A287IB17_HORVV	unreviewed	Uncharacterized protein		Hordeum vulgare subsp. vulgare (Domesticated barley)	137	unreviewed	112509	cellular organisms, Eukaryota, Viridiplantae, Streptophyta, Streptophytina, Embryophyta, Tracheophyta, Euphyllophyta, Spermatophyta, Magnoliophyta, Mesangiospermae, Liliopsida, Petrosaviidae, commelinids, Poales, Poaceae, BOP clade, Pooideae, Triticodae, Triticeae, Hordeinae, Hordeum, Hordeum vulgare (Barley), Hordeum vulgare subsp. vulgare (Domesticated barley)	Predicted	1 out of 5							2017-11-22	2017-11-22
A0A287P2P5	NZ_AMQV01000127.1:136-294	100	52	0	0	3	158	3	78	1e-18	99.4	A0A287P2P5	A0A287P2P5_HORVV	unreviewed	Uncharacterized protein		Hordeum vulgare subsp. vulgare (Domesticated barley)	81	unreviewed	112509	cellular organisms, Eukaryota, Viridiplantae, Streptophyta, Streptophytina, Embryophyta, Tracheophyta, Euphyllophyta, Spermatophyta, Magnoliophyta, Mesangiospermae, Liliopsida, Petrosaviidae, commelinids, Poales, Poaceae, BOP clade, Pooideae, Triticodae, Triticeae, Hordeinae, Hordeum, Hordeum vulgare (Barley), Hordeum vulgare subsp. vulgare (Domesticated barley)	Predicted	1 out of 5							2017-11-22	2017-11-22
A0A287P3Q7	NZ_CMHF01000056.1:2567-2736	100	52	0	0	2	157	43	94	3e-22	111.3	A0A287P3Q7	A0A287P3Q7_HORVV	unreviewed	Uncharacterized protein		Hordeum vulgare subsp. vulgare (Domesticated barley)	94	unreviewed	112509	cellular organisms, Eukaryota, Viridiplantae, Streptophyta, Streptophytina, Embryophyta, Tracheophyta, Euphyllophyta, Spermatophyta, Magnoliophyta, Mesangiospermae, Liliopsida, Petrosaviidae, commelinids, Poales, Poaceae, BOP clade, Pooideae, Triticodae, Triticeae, Hordeinae, Hordeum, Hordeum vulgare (Barley), Hordeum vulgare subsp. vulgare (Domesticated barley)	Predicted	1 out of 5							2017-11-22	2017-11-22
A0A287QPF2	NZ_JPAY01000012.1:1-176	98.28	58	1	0	1	174	143	200	2e-24	119	A0A287QPF2	A0A287QPF2_HORVV	unreviewed	Uncharacterized protein		Hordeum vulgare subsp. vulgare (Domesticated barley)	202	unreviewed	112509	cellular organisms, Eukaryota, Viridiplantae, Streptophyta, Streptophytina, Embryophyta, Tracheophyta, Euphyllophyta, Spermatophyta, Magnoliophyta, Mesangiospermae, Liliopsida, Petrosaviidae, commelinids, Poales, Poaceae, BOP clade, Pooideae, Triticodae, Triticeae, Hordeinae, Hordeum, Hordeum vulgare (Barley), Hordeum vulgare subsp. vulgare (Domesticated barley)	Predicted	1 out of 5							2017-11-22	2017-11-22
A0A287QPF5	NZ_LZSF01000266.1:234-403	98.21	56	1	0	1	168	40	95	4e-27	127.5	A0A287QPF5	A0A287QPF5_HORVV	unreviewed	Uncharacterized protein		Hordeum vulgare subsp. vulgare (Domesticated barley)	163	unreviewed	112509	cellular organisms, Eukaryota, Viridiplantae, Streptophyta, Streptophytina, Embryophyta, Tracheophyta, Euphyllophyta, Spermatophyta, Magnoliophyta, Mesangiospermae, Liliopsida, Petrosaviidae, commelinids, Poales, Poaceae, BOP clade, Pooideae, Triticodae, Triticeae, Hordeinae, Hordeum, Hordeum vulgare (Barley), Hordeum vulgare subsp. vulgare (Domesticated barley)	Predicted	1 out of 5							2017-11-22	2017-11-22
A0A287QPF9	NZ_JHOK01000061.1:480-649	96	50	2	0	169	20	19	68	1e-20	106.3	A0A287QPF9	A0A287QPF9_HORVV	unreviewed	Uncharacterized protein		Hordeum vulgare subsp. vulgare (Domesticated barley)	69	unreviewed	112509	cellular organisms, Eukaryota, Viridiplantae, Streptophyta, Streptophytina, Embryophyta, Tracheophyta, Euphyllophyta, Spermatophyta, Magnoliophyta, Mesangiospermae, Liliopsida, Petrosaviidae, commelinids, Poales, Poaceae, BOP clade, Pooideae, Triticodae, Triticeae, Hordeinae, Hordeum, Hordeum vulgare (Barley), Hordeum vulgare subsp. vulgare (Domesticated barley)	Predicted	1 out of 5							2017-11-22	2017-11-22
A0A287QPS8	NZ_BFCK01000531.1:377-552	100	53	0	0	176	18	18	119	6e-15	87	A0A287QPS8	A0A287QPS8_HORVV	unreviewed	Uncharacterized protein		Hordeum vulgare subsp. vulgare (Domesticated barley)	119	unreviewed	112509	cellular organisms, Eukaryota, Viridiplantae, Streptophyta, Streptophytina, Embryophyta, Tracheophyta, Euphyllophyta, Spermatophyta, Magnoliophyta, Mesangiospermae, Liliopsida, Petrosaviidae, commelinids, Poales, Poaceae, BOP clade, Pooideae, Triticodae, Triticeae, Hordeinae, Hordeum, Hordeum vulgare (Barley), Hordeum vulgare subsp. vulgare (Domesticated barley)	Predicted	1 out of 5							2017-11-22	2017-11-22
A0A287QPV8	NZ_AUTF01000030.1:775-938	96.3	54	2	0	1	162	34	87	1e-24	119.4	A0A287QPV8	A0A287QPV8_HORVV	unreviewed	Uncharacterized protein		Hordeum vulgare subsp. vulgare (Domesticated barley)	117	unreviewed	112509	cellular organisms, Eukaryota, Viridiplantae, Streptophyta, Streptophytina, Embryophyta, Tracheophyta, Euphyllophyta, Spermatophyta, Magnoliophyta, Mesangiospermae, Liliopsida, Petrosaviidae, commelinids, Poales, Poaceae, BOP clade, Pooideae, Triticodae, Triticeae, Hordeinae, Hordeum, Hordeum vulgare (Barley), Hordeum vulgare subsp. vulgare (Domesticated barley)	Predicted	1 out of 5							2017-11-22	2017-11-22
A0A287QPW3	NZ_CGZQ01000049.1:4889-5061	100	42	0	0	128	3	1	42	3e-17	94.7	A0A287QPW3	A0A287QPW3_HORVV	unreviewed	Uncharacterized protein		Hordeum vulgare subsp. vulgare (Domesticated barley)	92	unreviewed	112509	cellular organisms, Eukaryota, Viridiplantae, Streptophyta, Streptophytina, Embryophyta, Tracheophyta, Euphyllophyta, Spermatophyta, Magnoliophyta, Mesangiospermae, Liliopsida, Petrosaviidae, commelinids, Poales, Poaceae, BOP clade, Pooideae, Triticodae, Triticeae, Hordeinae, Hordeum, Hordeum vulgare (Barley), Hordeum vulgare subsp. vulgare (Domesticated barley)	Predicted	1 out of 5							2017-11-22	2017-11-22
A0A287QQ32	NZ_FTZV01000200.1:4459-4628	100	56	0	0	2	169	19	74	5e-26	124	A0A287QQ32	A0A287QQ32_HORVV	unreviewed	Uncharacterized protein		Hordeum vulgare subsp. vulgare (Domesticated barley)	95	unreviewed	112509	cellular organisms, Eukaryota, Viridiplantae, Streptophyta, Streptophytina, Embryophyta, Tracheophyta, Euphyllophyta, Spermatophyta, Magnoliophyta, Mesangiospermae, Liliopsida, Petrosaviidae, commelinids, Poales, Poaceae, BOP clade, Pooideae, Triticodae, Triticeae, Hordeinae, Hordeum, Hordeum vulgare (Barley), Hordeum vulgare subsp. vulgare (Domesticated barley)	Predicted	1 out of 5							2017-11-22	2017-11-22
A0A2A2I7M8	NZ_NPOA01000042.1:149-615	100	78	0	0	163	396	1	78	4e-39	167.9	A0A2A2I7M8	A0A2A2I7M8_9BACI	unreviewed	Uncharacterized protein	CIL05_21430	Virgibacillus profundi	78	unreviewed	2024555	cellular organisms, Bacteria, Terrabacteria group, Firmicutes, Bacilli, Bacillales, Bacillaceae, Virgibacillus, Virgibacillus profundi	Predicted	1 out of 5	CAUTION: The sequence shown here is derived from an EMBL/GenBank/DDBJ whole genome shotgun (WGS) entry which is preliminary data. {ECO:0000313|EMBL:PAV27582.1}.		NPOA01000042;				2017-12-20	2018-06-20
A0A2A2I8W5	NZ_NPOA01000044.1:1-291	98.75	80	1	0	240	1	1	80	1e-39	169.5	A0A2A2I8W5	A0A2A2I8W5_9BACI	unreviewed	Uncharacterized protein (Fragment)	CIL05_21455	Virgibacillus profundi	80	unreviewed	2024555	cellular organisms, Bacteria, Terrabacteria group, Firmicutes, Bacilli, Bacillales, Bacillaceae, Virgibacillus, Virgibacillus profundi	Predicted	1 out of 5	CAUTION: The sequence shown here is derived from an EMBL/GenBank/DDBJ whole genome shotgun (WGS) entry which is preliminary data. {ECO:0000313|EMBL:PAV27580.1}.	Non-terminal residue (1)	NPOA01000044;				2017-12-20	2018-06-20
A0A2A7QBU8	NZ_PCYT01000191.1:1-371	100	123	0	0	371	3	1	123	4e-67	260.8	A0A2A7QBU8	A0A2A7QBU8_9LACO	unreviewed	Endonuclease (Fragment)	CP368_10255	Lactobacillus sp. UMNPBX17	123	unreviewed	2042030	cellular organisms, Bacteria, Terrabacteria group, Firmicutes, Bacilli, Lactobacillales, Lactobacillaceae, Lactobacillus, Lactobacillus sp. UMNPBX17	Predicted	1 out of 5	CAUTION: The sequence shown here is derived from an EMBL/GenBank/DDBJ whole genome shotgun (WGS) entry which is preliminary data. {ECO:0000313|EMBL:PEG78578.1}.	Non-terminal residue (2)	PCYT01000191;				2017-12-20	2018-01-31
A0A2A8BWM4	NZ_NUDP01000249.1:1-205	100	68	0	0	205	2	16	83	2e-31	142.1	A0A2A8BWM4	A0A2A8BWM4_9BACI	unreviewed	Uncharacterized protein (Fragment)	CN613_28185	Bacillus pseudomycoides	83	unreviewed	64104	cellular organisms, Bacteria, Terrabacteria group, Firmicutes, Bacilli, Bacillales, Bacillaceae, Bacillus, Bacillus cereus group, Bacillus pseudomycoides	Predicted	1 out of 5	CAUTION: The sequence shown here is derived from an EMBL/GenBank/DDBJ whole genome shotgun (WGS) entry which is preliminary data. {ECO:0000313|EMBL:PEM59959.1}.	Non-terminal residue (2)	NUDP01000249;				2017-12-20	2017-12-20
A0A2A8EW71	NZ_NUAV01000371.1:1-235	100	64	0	0	1	192	1	64	4e-31	141	A0A2A8EW71	A0A2A8EW71_9BACI	unreviewed	Uncharacterized protein (Fragment)	CN555_30620	Bacillus wiedmannii	64	unreviewed	1890302	cellular organisms, Bacteria, Terrabacteria group, Firmicutes, Bacilli, Bacillales, Bacillaceae, Bacillus, Bacillus cereus group, Bacillus wiedmannii	Predicted	1 out of 5	CAUTION: The sequence shown here is derived from an EMBL/GenBank/DDBJ whole genome shotgun (WGS) entry which is preliminary data. {ECO:0000313|EMBL:PEO20747.1}.	Non-terminal residue (1)	NUAV01000371;				2017-12-20	2017-12-20
A0A2A8FTX1	NZ_NUBD01000092.1:1-255	100	84	0	0	253	2	1	84	8e-46	189.9	A0A2A8FTX1	A0A2A8FTX1_9BACI	unreviewed	Uncharacterized protein (Fragment)	CN572_26760	Bacillus wiedmannii	84	unreviewed	1890302	cellular organisms, Bacteria, Terrabacteria group, Firmicutes, Bacilli, Bacillales, Bacillaceae, Bacillus, Bacillus cereus group, Bacillus wiedmannii	Predicted	1 out of 5	CAUTION: The sequence shown here is derived from an EMBL/GenBank/DDBJ whole genome shotgun (WGS) entry which is preliminary data. {ECO:0000313|EMBL:PEO65492.1}.	Non-terminal residue (2)	NUBD01000092;				2017-12-20	2017-12-20
A0A2A8G8F5	NZ_NUBK01000117.1:1-314	100	82	0	0	1	246	1	82	8e-29	133.7	A0A2A8G8F5	A0A2A8G8F5_9BACI	unreviewed	Uncharacterized protein (Fragment)	CN552_30075	Bacillus wiedmannii	82	unreviewed	1890302	cellular organisms, Bacteria, Terrabacteria group, Firmicutes, Bacilli, Bacillales, Bacillaceae, Bacillus, Bacillus cereus group, Bacillus wiedmannii	Predicted	1 out of 5	CAUTION: The sequence shown here is derived from an EMBL/GenBank/DDBJ whole genome shotgun (WGS) entry which is preliminary data. {ECO:0000313|EMBL:PEP03066.1}.	Non-terminal residue (1)	NUBK01000117;				2017-12-20	2017-12-20
A0A2A8P6U4	NZ_NTVT01000073.1:69-219	100	50	0	0	2	151	24	73	8e-24	116.7	A0A2A8P6U4	A0A2A8P6U4_BACCE	unreviewed	Uncharacterized protein (Fragment)	CN419_30055	Bacillus cereus	73	unreviewed	1396	cellular organisms, Bacteria, Terrabacteria group, Firmicutes, Bacilli, Bacillales, Bacillaceae, Bacillus, Bacillus cereus group, Bacillus cereus	Predicted	1 out of 5	CAUTION: The sequence shown here is derived from an EMBL/GenBank/DDBJ whole genome shotgun (WGS) entry which is preliminary data. {ECO:0000313|EMBL:PEV19963.1}.	Non-terminal residue (2)	NTVT01000073;				2017-12-20	2017-12-20
A0A2A9M3Q5	NZ_FPMB01000003.1:1-2735	99.35	153	1	0	688	1146	1	153	9e-80	307.4	A0A2A9M3Q5	A0A2A9M3Q5_9APIC	unreviewed	Uncharacterized protein	BESB_058130	Besnoitia besnoiti	165	unreviewed	94643	cellular organisms, Eukaryota, Alveolata, Apicomplexa, Conoidasida, Coccidia, Eucoccidiorida, Eimeriorina, Sarcocystidae, Besnoitia, Besnoitia besnoiti	Predicted	1 out of 5	CAUTION: The sequence shown here is derived from an EMBL/GenBank/DDBJ whole genome shotgun (WGS) entry which is preliminary data. {ECO:0000313|EMBL:PFH30931.1}.	Domain (1)	NWUJ01000037;				2017-12-20	2018-03-28
A0A2A9M6C3	NZ_MTHY01000206.1:1-2272	95.58	113	5	0	1238	1576	1	113	5e-54	221.5	A0A2A9M6C3	A0A2A9M6C3_9APIC	unreviewed	Uncharacterized protein	BESB_058140	Besnoitia besnoiti	129	unreviewed	94643	cellular organisms, Eukaryota, Alveolata, Apicomplexa, Conoidasida, Coccidia, Eucoccidiorida, Eimeriorina, Sarcocystidae, Besnoitia, Besnoitia besnoiti	Predicted	1 out of 5	CAUTION: The sequence shown here is derived from an EMBL/GenBank/DDBJ whole genome shotgun (WGS) entry which is preliminary data. {ECO:0000313|EMBL:PFH30932.1}.		NWUJ01000037;				2017-12-20	2018-03-28
A0A2B1JYT5	NZ_JTCF02000054.1:1-447	100	110	0	0	447	118	65	174	5e-61	240.7	A0A2B1JYT5	A0A2B1JYT5_BACCE	unreviewed	Endonuclease (Fragment)	COJ50_26595	Bacillus cereus	174	unreviewed	1396	cellular organisms, Bacteria, Terrabacteria group, Firmicutes, Bacilli, Bacillales, Bacillaceae, Bacillus, Bacillus cereus group, Bacillus cereus	Predicted	1 out of 5	CAUTION: The sequence shown here is derived from an EMBL/GenBank/DDBJ whole genome shotgun (WGS) entry which is preliminary data. {ECO:0000313|EMBL:PFN17587.1}.	Non-terminal residue (1)	NUYN01000091;				2017-12-20	2018-01-31
A0A2B1K2A0	NZ_NUYN01000092.1:1-223	100	74	0	0	223	2	1	74	3e-38	164.9	A0A2B1K2A0	A0A2B1K2A0_BACCE	unreviewed	Uncharacterized protein (Fragment)	COJ50_26600	Bacillus cereus	74	unreviewed	1396	cellular organisms, Bacteria, Terrabacteria group, Firmicutes, Bacilli, Bacillales, Bacillaceae, Bacillus, Bacillus cereus group, Bacillus cereus	Predicted	1 out of 5	CAUTION: The sequence shown here is derived from an EMBL/GenBank/DDBJ whole genome shotgun (WGS) entry which is preliminary data. {ECO:0000313|EMBL:PFN17578.1}.	Non-terminal residue (2)	NUYN01000092;				2017-12-20	2018-01-31
A0A2B3TG24	NZ_NVDG01000172.1:1-312	100	103	0	0	2	310	1	103	1e-59	236.1	A0A2B3TG24	A0A2B3TG24_BACCE	unreviewed	Uncharacterized protein (Fragment)	COK86_30495	Bacillus cereus	103	unreviewed	1396	cellular organisms, Bacteria, Terrabacteria group, Firmicutes, Bacilli, Bacillales, Bacillaceae, Bacillus, Bacillus cereus group, Bacillus cereus	Predicted	1 out of 5	CAUTION: The sequence shown here is derived from an EMBL/GenBank/DDBJ whole genome shotgun (WGS) entry which is preliminary data. {ECO:0000313|EMBL:PFU35768.1}.	Non-terminal residue (1)	NVDG01000172;				2017-12-20	2018-01-31
A0A2B5ASZ2	NZ_NVFP01000391.1:1-246	100	67	0	0	245	45	1	67	1e-30	139.4	A0A2B5ASZ2	A0A2B5ASZ2_9BACI	unreviewed	Uncharacterized protein (Fragment)	COL55_33340	Bacillus toyonensis	67	unreviewed	155322	cellular organisms, Bacteria, Terrabacteria group, Firmicutes, Bacilli, Bacillales, Bacillaceae, Bacillus, Bacillus cereus group, Bacillus toyonensis	Predicted	1 out of 5	CAUTION: The sequence shown here is derived from an EMBL/GenBank/DDBJ whole genome shotgun (WGS) entry which is preliminary data. {ECO:0000313|EMBL:PFY29603.1}.	Non-terminal residue (1)	NVFP01000391;				2017-12-20	2018-01-31
A0A2B8U4S4	NZ_NUGV01000207.1:1-337	100	108	0	0	14	337	1	108	2e-63	248.4	A0A2B8U4S4	A0A2B8U4S4_9BACI	unreviewed	Uncharacterized protein (Fragment)	CN931_29255	Bacillus sp. AFS054943	108	unreviewed	2033506	cellular organisms, Bacteria, Terrabacteria group, Firmicutes, Bacilli, Bacillales, Bacillaceae, Bacillus, Bacillus sp. AFS054943	Predicted	1 out of 5	CAUTION: The sequence shown here is derived from an EMBL/GenBank/DDBJ whole genome shotgun (WGS) entry which is preliminary data. {ECO:0000313|EMBL:PGL73819.1}.	Non-terminal residue (1)	NUGV01000207;				2017-12-20	2018-01-31
A0A2B8U882	NZ_NUGV01000208.1:1-276	100	92	0	0	1	276	1	92	8e-43	179.9	A0A2B8U882	A0A2B8U882_9BACI	unreviewed	Uncharacterized protein (Fragment)	CN931_29260	Bacillus sp. AFS054943	92	unreviewed	2033506	cellular organisms, Bacteria, Terrabacteria group, Firmicutes, Bacilli, Bacillales, Bacillaceae, Bacillus, Bacillus sp. AFS054943	Predicted	1 out of 5	CAUTION: The sequence shown here is derived from an EMBL/GenBank/DDBJ whole genome shotgun (WGS) entry which is preliminary data. {ECO:0000313|EMBL:PGL73812.1}.	Domain (1); Non-terminal residue (2)	NUGV01000208;				2017-12-20	2018-01-31
A0A2B8U9U0	NZ_NUGV01000209.1:1-326	100	108	0	0	3	326	1	108	9e-57	226.5	A0A2B8U9U0	A0A2B8U9U0_9BACI	unreviewed	Uncharacterized protein (Fragment)	CN931_29265	Bacillus sp. AFS054943	108	unreviewed	2033506	cellular organisms, Bacteria, Terrabacteria group, Firmicutes, Bacilli, Bacillales, Bacillaceae, Bacillus, Bacillus sp. AFS054943	Predicted	1 out of 5	CAUTION: The sequence shown here is derived from an EMBL/GenBank/DDBJ whole genome shotgun (WGS) entry which is preliminary data. {ECO:0000313|EMBL:PGL73805.1}.	Non-terminal residue (2)	NUGV01000209;				2017-12-20	2018-01-31
A0A2C0HMJ0	NZ_NUJY01000715.1:1-295	100	98	0	0	294	1	1	98	2e-56	224.9	A0A2C0HMJ0	A0A2C0HMJ0_BACCE	unreviewed	Uncharacterized protein (Fragment)	COA26_34080	Bacillus cereus	98	unreviewed	1396	cellular organisms, Bacteria, Terrabacteria group, Firmicutes, Bacilli, Bacillales, Bacillaceae, Bacillus, Bacillus cereus group, Bacillus cereus	Predicted	1 out of 5	CAUTION: The sequence shown here is derived from an EMBL/GenBank/DDBJ whole genome shotgun (WGS) entry which is preliminary data. {ECO:0000313|EMBL:PGQ44355.1}.	Non-terminal residue (2)	NUJY01000715;				2017-12-20	2018-01-31
A0A2C1A4Q1	NZ_ALQR01000038.1:907-4200	100	77	0	0	88	318	1	77	9e-37	164.9	A0A2C1A4Q1	A0A2C1A4Q1_BACCE	unreviewed	Uncharacterized protein (Fragment)	COC69_33545	Bacillus cereus	77	unreviewed	1396	cellular organisms, Bacteria, Terrabacteria group, Firmicutes, Bacilli, Bacillales, Bacillaceae, Bacillus, Bacillus cereus group, Bacillus cereus	Predicted	1 out of 5	CAUTION: The sequence shown here is derived from an EMBL/GenBank/DDBJ whole genome shotgun (WGS) entry which is preliminary data. {ECO:0000313|EMBL:PGS58352.1}.	Non-terminal residue (2)	NULI01000460;				2017-12-20	2018-01-31
A0A2C1AEH0	NZ_NULI01000372.1:1-204	100	68	0	0	1	204	1	68	5e-18	97.4	A0A2C1AEH0	A0A2C1AEH0_BACCE	unreviewed	Uncharacterized protein (Fragment)	COC69_32730	Bacillus cereus	68	unreviewed	1396	cellular organisms, Bacteria, Terrabacteria group, Firmicutes, Bacilli, Bacillales, Bacillaceae, Bacillus, Bacillus cereus group, Bacillus cereus	Predicted	1 out of 5	CAUTION: The sequence shown here is derived from an EMBL/GenBank/DDBJ whole genome shotgun (WGS) entry which is preliminary data. {ECO:0000313|EMBL:PGS61513.1}.	Non-terminal residue (2)	NULI01000372;				2017-12-20	2018-01-31
A0A2C1RMK3	NZ_NUMR01000232.1:1-266	100	88	0	0	265	2	1	88	3e-50	204.5	A0A2C1RMK3	A0A2C1RMK3_BACCE	unreviewed	Uncharacterized protein (Fragment)	COD67_23985	Bacillus cereus	88	unreviewed	1396	cellular organisms, Bacteria, Terrabacteria group, Firmicutes, Bacilli, Bacillales, Bacillaceae, Bacillus, Bacillus cereus group, Bacillus cereus	Predicted	1 out of 5	CAUTION: The sequence shown here is derived from an EMBL/GenBank/DDBJ whole genome shotgun (WGS) entry which is preliminary data. {ECO:0000313|EMBL:PGU60838.1}.	Non-terminal residue (2)	NUMR01000232;				2017-12-20	2018-06-20
A0A2C5GSL0	NZ_NUTZ01000168.1:1-222	100	74	0	0	222	1	1	74	8e-35	153.3	A0A2C5GSL0	A0A2C5GSL0_9BACI	unreviewed	Uncharacterized protein (Fragment)	COI42_27790	Bacillus aryabhattai	74	unreviewed	412384	cellular organisms, Bacteria, Terrabacteria group, Firmicutes, Bacilli, Bacillales, Bacillaceae, Bacillus, Bacillus aryabhattai	Predicted	1 out of 5	CAUTION: The sequence shown here is derived from an EMBL/GenBank/DDBJ whole genome shotgun (WGS) entry which is preliminary data. {ECO:0000313|EMBL:PHF63129.1}.	Non-terminal residue (2)	NUTZ01000168;				2017-12-20	2018-01-31
A0A2C5QD91	NZ_NUUR01000242.1:1-225	100	74	0	0	4	225	1	74	8e-38	163.3	A0A2C5QD91	A0A2C5QD91_BACCE	unreviewed	Uncharacterized protein (Fragment)	COI69_34015	Bacillus cereus	74	unreviewed	1396	cellular organisms, Bacteria, Terrabacteria group, Firmicutes, Bacilli, Bacillales, Bacillaceae, Bacillus, Bacillus cereus group, Bacillus cereus	Predicted	1 out of 5	CAUTION: The sequence shown here is derived from an EMBL/GenBank/DDBJ whole genome shotgun (WGS) entry which is preliminary data. {ECO:0000313|EMBL:PHG67870.1}.	Domain (1); Non-terminal residue (1)	NUUR01000242;				2017-12-20	2018-01-31
A0A2G5LGM8	NZ_LJRY01000373.1:1-370	100	72	0	0	3	218	1	72	2e-32	145.6	A0A2G5LGM8	A0A2G5LGM8_9PSED	unreviewed	Uncharacterized protein (Fragment)	AOA59_27380	Pseudomonas sp. 2822-15	72	unreviewed	1712677	cellular organisms, Bacteria, Proteobacteria, Gammaproteobacteria, Pseudomonadales, Pseudomonadaceae, Pseudomonas, Pseudomonas sp. 2822-15	Predicted	1 out of 5	CAUTION: The sequence shown here is derived from an EMBL/GenBank/DDBJ whole genome shotgun (WGS) entry which is preliminary data. {ECO:0000313|EMBL:PIB40652.1}.	Non-terminal residue (1)	LJRY01000373;				2018-01-31	2018-04-25
A0A2G5LIP6	NZ_LJRY01000223.1:1-254	100	84	0	0	2	253	1	84	3e-41	174.9	A0A2G5LIP6	A0A2G5LIP6_9PSED	unreviewed	Uncharacterized protein (Fragment)	AOA59_24830	Pseudomonas sp. 2822-15	84	unreviewed	1712677	cellular organisms, Bacteria, Proteobacteria, Gammaproteobacteria, Pseudomonadales, Pseudomonadaceae, Pseudomonas, Pseudomonas sp. 2822-15	Predicted	1 out of 5	CAUTION: The sequence shown here is derived from an EMBL/GenBank/DDBJ whole genome shotgun (WGS) entry which is preliminary data. {ECO:0000313|EMBL:PIB41193.1}.	Domain (1); Non-terminal residue (2)	LJRY01000223;				2018-01-31	2018-04-25
A0A2G5M2I2	NZ_LJRY01000119.1:1-769	100	256	0	0	769	2	1	256	1e-139	503.4	A0A2G5M2I2	A0A2G5M2I2_9PSED	unreviewed	Endonuclease (Fragment)	AOA59_00455	Pseudomonas sp. 2822-15	256	unreviewed	1712677	cellular organisms, Bacteria, Proteobacteria, Gammaproteobacteria, Pseudomonadales, Pseudomonadaceae, Pseudomonas, Pseudomonas sp. 2822-15	Predicted	1 out of 5	CAUTION: The sequence shown here is derived from an EMBL/GenBank/DDBJ whole genome shotgun (WGS) entry which is preliminary data. {ECO:0000313|EMBL:PIB47440.1}.	Domain (1); Non-terminal residue (2)	LJRY01000119;				2018-01-31	2018-04-25
A0A2G5N016	NZ_LJRZ01000450.1:1-1014	100	232	0	0	319	1014	1	232	3e-125	456.4	A0A2G5N016	A0A2G5N016_9PSED	unreviewed	Endonuclease (Fragment)	AOA60_15330	Pseudomonas sp. 2822-17	232	unreviewed	1712678	cellular organisms, Bacteria, Proteobacteria, Gammaproteobacteria, Pseudomonadales, Pseudomonadaceae, Pseudomonas, Pseudomonas sp. 2822-17	Predicted	1 out of 5	CAUTION: The sequence shown here is derived from an EMBL/GenBank/DDBJ whole genome shotgun (WGS) entry which is preliminary data. {ECO:0000313|EMBL:PIB59492.1}.	Domain (1); Non-terminal residue (1)	LJRZ01000450;				2018-01-31	2018-04-25
A0A2G5N4R3	NZ_APME01000129.1:415-1186	98	200	4	0	83	682	1	200	6e-116	424.9	A0A2G5N4R3	A0A2G5N4R3_9PSED	unreviewed	Uncharacterized protein	AOA60_12635	Pseudomonas sp. 2822-17	200	unreviewed	1712678	cellular organisms, Bacteria, Proteobacteria, Gammaproteobacteria, Pseudomonadales, Pseudomonadaceae, Pseudomonas, Pseudomonas sp. 2822-17	Predicted	1 out of 5	CAUTION: The sequence shown here is derived from an EMBL/GenBank/DDBJ whole genome shotgun (WGS) entry which is preliminary data. {ECO:0000313|EMBL:PIB61095.1}.	Domain (1)	LJRZ01000403;				2018-01-31	2018-04-25
A0A2G5N4W1	NZ_CANR01000100.1:1-1160	98.68	151	2	0	606	1058	3	153	4e-83	316.6	A0A2G5N4W1	A0A2G5N4W1_9PSED	unreviewed	Uncharacterized protein	AOA60_12640	Pseudomonas sp. 2822-17	153	unreviewed	1712678	cellular organisms, Bacteria, Proteobacteria, Gammaproteobacteria, Pseudomonadales, Pseudomonadaceae, Pseudomonas, Pseudomonas sp. 2822-17	Predicted	1 out of 5	CAUTION: The sequence shown here is derived from an EMBL/GenBank/DDBJ whole genome shotgun (WGS) entry which is preliminary data. {ECO:0000313|EMBL:PIB61096.1}.		LJRZ01000403;				2018-01-31	2018-04-25
A0A2G9DB95	NZ_BAFU01000140.1:82-252	97.92	48	1	0	19	162	1	48	7e-19	100.1	A0A2G9DB95	A0A2G9DB95_9ACTN	unreviewed	Uncharacterized protein (Fragment)	CTU88_45935	Streptomyces sp. JV178	76	unreviewed	858632	cellular organisms, Bacteria, Terrabacteria group, Actinobacteria, Actinobacteria (high G+C Gram-positive bacteria), Streptomycetales, Streptomycetaceae, Streptomyces, Streptomyces sp. JV178	Predicted	1 out of 5	CAUTION: The sequence shown here is derived from an EMBL/GenBank/DDBJ whole genome shotgun (WGS) entry which is preliminary data. {ECO:0000313|EMBL:PIM65966.1}.	Non-terminal residue (1)	PEKU01000309;				2018-01-31	2018-06-20
A0A2G9DBC6	NZ_PEKU01000447.1:66-878	100	157	0	0	702	232	1	157	3e-92	346.3	A0A2G9DBC6	A0A2G9DBC6_9ACTN	unreviewed	Uncharacterized protein	CTU88_46470	Streptomyces sp. JV178	157	unreviewed	858632	cellular organisms, Bacteria, Terrabacteria group, Actinobacteria, Actinobacteria (high G+C Gram-positive bacteria), Streptomycetales, Streptomycetaceae, Streptomyces, Streptomyces sp. JV178	Predicted	1 out of 5	CAUTION: The sequence shown here is derived from an EMBL/GenBank/DDBJ whole genome shotgun (WGS) entry which is preliminary data. {ECO:0000313|EMBL:PIM65892.1}.	Domain (1)	PEKU01000447;				2018-01-31	2018-06-20
A0A2H6KKL1	NZ_BEAF01000015.1:4285-5052	98.82	255	3	0	768	4	54	308	9e-106	391	A0A2H6KKL1	A0A2H6KKL1_9APIC	unreviewed	LINE-1 type transposase domain-containing 1-like protein	BOVATA_050220	Babesia ovata	308	unreviewed	189622	cellular organisms, Eukaryota, Alveolata, Apicomplexa, Aconoidasida, Piroplasmida (Piroplasmids), Babesiidae, Babesia, Babesia ovata	Predicted	1 out of 5	CAUTION: The sequence shown here is derived from an EMBL/GenBank/DDBJ whole genome shotgun (WGS) entry which is preliminary data. {ECO:0000313|EMBL:GBE63529.1}.	Coiled coil (2); Domain (2)	BDSA01000072;				2018-02-28	2018-09-12
A0A2H6KKM1	NZ_BEDS01000027.1:1431-4721	98.73	946	12	0	454	3291	1	946	0	1800.8	A0A2H6KKM1	A0A2H6KKM1_9APIC	unreviewed	Retrovirus-related Pol poly LINE-1, putative	BOVATA_050210	Babesia ovata	1121	unreviewed	189622	cellular organisms, Eukaryota, Alveolata, Apicomplexa, Aconoidasida, Piroplasmida (Piroplasmids), Babesiidae, Babesia, Babesia ovata	Predicted	1 out of 5	CAUTION: The sequence shown here is derived from an EMBL/GenBank/DDBJ whole genome shotgun (WGS) entry which is preliminary data. {ECO:0000313|EMBL:GBE63528.1}.	Coiled coil (2); Domain (1)	BDSA01000072;				2018-02-28	2018-06-20
A0A2H6LAK9	NZ_BFAC01000056.1:94-722	100	60	0	0	401	580	1	60	1e-25	124	A0A2H6LAK9	A0A2H6LAK9_MICAE	unreviewed	Uncharacterized protein	myaer87_43500	Microcystis aeruginosa NIES-87	60	unreviewed	449440	cellular organisms, Bacteria, Terrabacteria group, Cyanobacteria/Melainabacteria group, Cyanobacteria, Oscillatoriophycideae, Chroococcales, Microcystaceae, Microcystis, Microcystis aeruginosa, Microcystis aeruginosa NIES-87	Predicted	1 out of 5	CAUTION: The sequence shown here is derived from an EMBL/GenBank/DDBJ whole genome shotgun (WGS) entry which is preliminary data. {ECO:0000313|EMBL:GBE77123.1}.		BFAC01000056;				2018-02-28	2018-10-10
A0A2I2KZ22	NZ_CMHG01000050.1:5-174	100	53	0	0	10	168	1	53	8e-24	116.7	A0A2I2KZ22	A0A2I2KZ22_9ACTN	unreviewed	Uncharacterized protein	FRACA_5660001	Frankia canadensis	56	unreviewed	1836972	cellular organisms, Bacteria, Terrabacteria group, Actinobacteria, Actinobacteria (high G+C Gram-positive bacteria), Frankiales, Frankiaceae, Frankia, Frankia canadensis	Predicted	1 out of 5			FZMO01000519;				2018-02-28	2018-10-10
A0A2I2KZ24	NZ_FZMO01000516.1:75-245	100	44	0	0	171	40	28	71	3e-16	91.3	A0A2I2KZ24	A0A2I2KZ24_9ACTN	unreviewed	Uncharacterized protein	FRACA_5630001	Frankia canadensis	71	unreviewed	1836972	cellular organisms, Bacteria, Terrabacteria group, Actinobacteria, Actinobacteria (high G+C Gram-positive bacteria), Frankiales, Frankiaceae, Frankia, Frankia canadensis	Predicted	1 out of 5			FZMO01000516;				2018-02-28	2018-10-10
A0A2K1BUB6	NZ_POWH01000994.1:90-252	100	34	0	0	3	104	21	64	6e-13	80.5	A0A2K1BUB6	A0A2K1BUB6_9VIBR	unreviewed	Uncharacterized protein (Fragment)	C1141_22105	Vibrio agarivorans	64	unreviewed	153622	cellular organisms, Bacteria, Proteobacteria, Gammaproteobacteria, Vibrionales, Vibrionaceae, Vibrio, Vibrio agarivorans	Predicted	1 out of 5	CAUTION: The sequence shown here is derived from an EMBL/GenBank/DDBJ whole genome shotgun (WGS) entry which is preliminary data. {ECO:0000313|EMBL:PNQ47120.1}.	Non-terminal residue (1)	POWH01000994;				2018-03-28	2018-04-25
A0A2K1C0L4	NZ_CKJX01000039.1:152-326	98.11	53	1	0	1	159	21	73	8e-24	116.7	A0A2K1C0L4	A0A2K1C0L4_9VIBR	unreviewed	Uncharacterized protein (Fragment)	C1141_21775	Vibrio agarivorans	73	unreviewed	153622	cellular organisms, Bacteria, Proteobacteria, Gammaproteobacteria, Vibrionales, Vibrionaceae, Vibrio, Vibrio agarivorans	Predicted	1 out of 5	CAUTION: The sequence shown here is derived from an EMBL/GenBank/DDBJ whole genome shotgun (WGS) entry which is preliminary data. {ECO:0000313|EMBL:PNQ49316.1}.	Non-terminal residue (1)	POWH01000929;				2018-03-28	2018-04-25
A0A2K1CCX3	NZ_POWH01000657.1:20-763	100	200	0	0	83	682	1	200	3e-118	432.2	A0A2K1CCX3	A0A2K1CCX3_9VIBR	unreviewed	Uncharacterized protein	C1141_20300	Vibrio agarivorans	200	unreviewed	153622	cellular organisms, Bacteria, Proteobacteria, Gammaproteobacteria, Vibrionales, Vibrionaceae, Vibrio, Vibrio agarivorans	Predicted	1 out of 5	CAUTION: The sequence shown here is derived from an EMBL/GenBank/DDBJ whole genome shotgun (WGS) entry which is preliminary data. {ECO:0000313|EMBL:PNQ53621.1}.	Domain (1)	POWH01000657;				2018-03-28	2018-04-25
A0A2K3K1D8	NZ_KL476634.1:341-537	98.46	65	1	0	1	195	13	92	1e-29	136	A0A2K3K1D8	A0A2K3K1D8_TRIPR	unreviewed	Uncharacterized protein	L195_g060023	Trifolium pratense (Red clover)	92	unreviewed	57577	cellular organisms, Eukaryota, Viridiplantae, Streptophyta, Streptophytina, Embryophyta, Tracheophyta, Euphyllophyta, Spermatophyta, Magnoliophyta, Mesangiospermae, eudicotyledons, Gunneridae, Pentapetalae, rosids, fabids, Fabales, Fabaceae, Papilionoideae, 50 kb inversion clade, NPAAA clade, Hologalegina, IRL clade, Trifolieae, Trifolium, Trifolium pratense (Red clover)	Predicted	1 out of 5	CAUTION: The sequence shown here is derived from an EMBL/GenBank/DDBJ whole genome shotgun (WGS) entry which is preliminary data. {ECO:0000313|EMBL:PNX60111.1}.		ASHM01135078;				2018-03-28	2018-09-12
A0A2K3KEM2	NZ_PKSS01000104.1:71-231	98.04	51	1	0	153	1	1	71	5e-21	107.5	A0A2K3KEM2	A0A2K3KEM2_TRIPR	unreviewed	Uncharacterized protein	L195_g062251	Trifolium pratense (Red clover)	82	unreviewed	57577	cellular organisms, Eukaryota, Viridiplantae, Streptophyta, Streptophytina, Embryophyta, Tracheophyta, Euphyllophyta, Spermatophyta, Magnoliophyta, Mesangiospermae, eudicotyledons, Gunneridae, Pentapetalae, rosids, fabids, Fabales, Fabaceae, Papilionoideae, 50 kb inversion clade, NPAAA clade, Hologalegina, IRL clade, Trifolieae, Trifolium, Trifolium pratense (Red clover)	Predicted	1 out of 5	CAUTION: The sequence shown here is derived from an EMBL/GenBank/DDBJ whole genome shotgun (WGS) entry which is preliminary data. {ECO:0000313|EMBL:PNX64713.1}.		ASHM01169478;				2018-03-28	2018-09-12
A0A2K3KMQ7	NZ_CMIB01000071.1:90-291	100	66	0	0	3	200	7	72	8e-38	163.3	A0A2K3KMQ7	A0A2K3KMQ7_TRIPR	unreviewed	Uncharacterized protein (Fragment)	L195_g063592	Trifolium pratense (Red clover)	72	unreviewed	57577	cellular organisms, Eukaryota, Viridiplantae, Streptophyta, Streptophytina, Embryophyta, Tracheophyta, Euphyllophyta, Spermatophyta, Magnoliophyta, Mesangiospermae, eudicotyledons, Gunneridae, Pentapetalae, rosids, fabids, Fabales, Fabaceae, Papilionoideae, 50 kb inversion clade, NPAAA clade, Hologalegina, IRL clade, Trifolieae, Trifolium, Trifolium pratense (Red clover)	Predicted	1 out of 5	CAUTION: The sequence shown here is derived from an EMBL/GenBank/DDBJ whole genome shotgun (WGS) entry which is preliminary data. {ECO:0000313|EMBL:PNX67598.1}.	Non-terminal residue (1)	ASHM01212226;				2018-03-28	2018-09-12
A0A2K3LYW1	NZ_CMKS01000131.1:197-331	100	32	0	0	111	16	48	79	2e-11	75.5	A0A2K3LYW1	A0A2K3LYW1_TRIPR	unreviewed	Uncharacterized protein (Fragment)	L195_g039768	Trifolium pratense (Red clover)	96	unreviewed	57577	cellular organisms, Eukaryota, Viridiplantae, Streptophyta, Streptophytina, Embryophyta, Tracheophyta, Euphyllophyta, Spermatophyta, Magnoliophyta, Mesangiospermae, eudicotyledons, Gunneridae, Pentapetalae, rosids, fabids, Fabales, Fabaceae, Papilionoideae, 50 kb inversion clade, NPAAA clade, Hologalegina, IRL clade, Trifolieae, Trifolium, Trifolium pratense (Red clover)	Predicted	1 out of 5	CAUTION: The sequence shown here is derived from an EMBL/GenBank/DDBJ whole genome shotgun (WGS) entry which is preliminary data. {ECO:0000313|EMBL:PNX83721.1}.	Non-terminal residue (2)	ASHM01044779;				2018-03-28	2018-09-12
A0A2K3MGY5	NZ_QEMY01001274.1:112-320	100	43	0	0	3	131	58	100	2e-17	95.9	A0A2K3MGY5	A0A2K3MGY5_TRIPR	unreviewed	Uncharacterized protein	L195_g046166	Trifolium pratense (Red clover)	100	unreviewed	57577	cellular organisms, Eukaryota, Viridiplantae, Streptophyta, Streptophytina, Embryophyta, Tracheophyta, Euphyllophyta, Spermatophyta, Magnoliophyta, Mesangiospermae, eudicotyledons, Gunneridae, Pentapetalae, rosids, fabids, Fabales, Fabaceae, Papilionoideae, 50 kb inversion clade, NPAAA clade, Hologalegina, IRL clade, Trifolieae, Trifolium, Trifolium pratense (Red clover)	Predicted	1 out of 5	CAUTION: The sequence shown here is derived from an EMBL/GenBank/DDBJ whole genome shotgun (WGS) entry which is preliminary data. {ECO:0000313|EMBL:PNX90043.1}.		ASHM01061638;				2018-03-28	2018-09-12
A0A2K3MGZ5	NZ_KZ794899.1:444-612	97.96	49	1	0	21	167	1	49	8e-21	106.7	A0A2K3MGZ5	A0A2K3MGZ5_TRIPR	unreviewed	Uncharacterized protein	L195_g046164	Trifolium pratense (Red clover)	115	unreviewed	57577	cellular organisms, Eukaryota, Viridiplantae, Streptophyta, Streptophytina, Embryophyta, Tracheophyta, Euphyllophyta, Spermatophyta, Magnoliophyta, Mesangiospermae, eudicotyledons, Gunneridae, Pentapetalae, rosids, fabids, Fabales, Fabaceae, Papilionoideae, 50 kb inversion clade, NPAAA clade, Hologalegina, IRL clade, Trifolieae, Trifolium, Trifolium pratense (Red clover)	Predicted	1 out of 5	CAUTION: The sequence shown here is derived from an EMBL/GenBank/DDBJ whole genome shotgun (WGS) entry which is preliminary data. {ECO:0000313|EMBL:PNX90041.1}.		ASHM01061638;				2018-03-28	2018-09-12
A0A2L2YLQ3	NZ_CP012744.1:68421-68667	97.3	37	1	0	203	93	32	68	6e-12	77.4	A0A2L2YLQ3	A0A2L2YLQ3_PARTP	unreviewed	Uncharacterized protein		Parasteatoda tepidariorum (House spider) (Achaearanea tepidariorum)	68	unreviewed	114398	cellular organisms, Eukaryota, Opisthokonta, Metazoa, Eumetazoa, Bilateria, Protostomia, Ecdysozoa, Panarthropoda, Arthropoda, Chelicerata, Arachnida, Araneae (spiders), Araneomorphae, Entelegynae, Orbiculariae, Araneoidea, Theridiidae (cobweb weavers), Parasteatoda, Parasteatoda tepidariorum (House spider) (Achaearanea tepidariorum)	Evidence at transcript level	1 out of 5			IAAA01038558;				2018-04-25	2018-04-25
A0A2L2YTB5	NZ_LMSZ01000030.1:1-1046	96.39	166	6	0	200	697	1	166	3e-83	317	A0A2L2YTB5	A0A2L2YTB5_PARTP	unreviewed	LINE-1 reverse transcriptase protein (Fragment)		Parasteatoda tepidariorum (House spider) (Achaearanea tepidariorum)	166	unreviewed	114398	cellular organisms, Eukaryota, Opisthokonta, Metazoa, Eumetazoa, Bilateria, Protostomia, Ecdysozoa, Panarthropoda, Arthropoda, Chelicerata, Arachnida, Araneae (spiders), Araneomorphae, Entelegynae, Orbiculariae, Araneoidea, Theridiidae (cobweb weavers), Parasteatoda, Parasteatoda tepidariorum (House spider) (Achaearanea tepidariorum)	Evidence at transcript level	1 out of 5		Domain (1); Non-terminal residue (2)	IAAA01057801;				2018-04-25	2018-06-20
A0A2L2Z1Q2	NZ_PZRW01000022.1:126-335	96.43	56	2	0	210	43	18	78	2e-23	115.5	A0A2L2Z1Q2	A0A2L2Z1Q2_PARTP	unreviewed	Uncharacterized protein (Fragment)		Parasteatoda tepidariorum (House spider) (Achaearanea tepidariorum)	78	unreviewed	114398	cellular organisms, Eukaryota, Opisthokonta, Metazoa, Eumetazoa, Bilateria, Protostomia, Ecdysozoa, Panarthropoda, Arthropoda, Chelicerata, Arachnida, Araneae (spiders), Araneomorphae, Entelegynae, Orbiculariae, Araneoidea, Theridiidae (cobweb weavers), Parasteatoda, Parasteatoda tepidariorum (House spider) (Achaearanea tepidariorum)	Evidence at transcript level	1 out of 5		Non-terminal residue (2); Transmembrane (1)	IAAA01083312;				2018-04-25	2018-06-20
A0A2M9WQN2	NZ_NJNO01000580.1:1-307	100	76	0	0	307	80	10	85	3e-36	158.3	A0A2M9WQN2	A0A2M9WQN2_BACCE	unreviewed	Uncharacterized protein (Fragment)	CEW46_32845	Bacillus cereus	85	unreviewed	1396	cellular organisms, Bacteria, Terrabacteria group, Firmicutes, Bacilli, Bacillales, Bacillaceae, Bacillus, Bacillus cereus group, Bacillus cereus	Predicted	1 out of 5	CAUTION: The sequence shown here is derived from an EMBL/GenBank/DDBJ whole genome shotgun (WGS) entry which is preliminary data. {ECO:0000313|EMBL:PJZ17729.1}.	Non-terminal residue (1)	NJNO01000580;				2018-04-25	2018-04-25
A0A2M9XJ17	NZ_CMHG01000050.1:5-174	100	56	0	0	2	169	11	66	4e-25	120.9	A0A2M9XJ17	A0A2M9XJ17_9LEPT	unreviewed	Uncharacterized protein	CH370_22240	Leptospira sp. JW3-C-A1	118	unreviewed	2023180	cellular organisms, Bacteria, Spirochaetes, Spirochaetia, Leptospirales, Leptospiraceae, Leptospira, Leptospira sp. JW3-C-A1	Predicted	1 out of 5	CAUTION: The sequence shown here is derived from an EMBL/GenBank/DDBJ whole genome shotgun (WGS) entry which is preliminary data. {ECO:0000313|EMBL:PJZ39300.1}.		NPDO01000061;				2018-04-25	2018-04-25
A0A2M9XJA5	NZ_NPDO01000024.1:945-4238	100	1098	0	0	3294	1	1	1098	0	2217.6	A0A2M9XJA5	A0A2M9XJA5_9LEPT	unreviewed	Endonuclease	CH370_21700	Leptospira sp. JW3-C-A1	1275	unreviewed	2023180	cellular organisms, Bacteria, Spirochaetes, Spirochaetia, Leptospirales, Leptospiraceae, Leptospira, Leptospira sp. JW3-C-A1	Predicted	1 out of 5	CAUTION: The sequence shown here is derived from an EMBL/GenBank/DDBJ whole genome shotgun (WGS) entry which is preliminary data. {ECO:0000313|EMBL:PJZ39392.1}.	Coiled coil (1); Domain (1)	NPDO01000024;				2018-04-25	2018-06-20
A0A2M9XJE0	NZ_FTZV01000294.1:1314-3058	95.59	272	12	0	1032	217	2	273	5e-134	486.9	A0A2M9XJE0	A0A2M9XJE0_9LEPT	unreviewed	Uncharacterized protein (Fragment)	CH370_21705	Leptospira sp. JW3-C-A1	273	unreviewed	2023180	cellular organisms, Bacteria, Spirochaetes, Spirochaetia, Leptospirales, Leptospiraceae, Leptospira, Leptospira sp. JW3-C-A1	Predicted	1 out of 5	CAUTION: The sequence shown here is derived from an EMBL/GenBank/DDBJ whole genome shotgun (WGS) entry which is preliminary data. {ECO:0000313|EMBL:PJZ39393.1}.	Coiled coil (1); Domain (2); Non-terminal residue (1)	NPDO01000024;				2018-04-25	2018-09-12
A0A2N0NDS3	NZ_FTZV01000320.1:2-191	95.24	63	3	0	1	189	2	64	3e-28	131.7	A0A2N0NDS3	A0A2N0NDS3_9GLOM	unreviewed	Uncharacterized protein	RhiirA5_443582	Rhizophagus irregularis	159	unreviewed	588596	cellular organisms, Eukaryota, Opisthokonta, Fungi, Fungi incertae sedis, Mucoromycota, Glomeromycotina, Glomeromycetes, Glomerales, Glomeraceae, Rhizophagus, Rhizophagus irregularis	Predicted	1 out of 5	CAUTION: The sequence shown here is derived from an EMBL/GenBank/DDBJ whole genome shotgun (WGS) entry which is preliminary data. {ECO:0000313|EMBL:PKB92733.1}.		LLXJ01010062;				2018-04-25	2018-05-23
A0A2N0NER1	NZ_FWYR01000098.1:64-261	100	30	0	0	198	109	45	74	1e-08	66.2	A0A2N0NER1	A0A2N0NER1_9GLOM	unreviewed	Uncharacterized protein (Fragment)	RhiirA5_442468	Rhizophagus irregularis	74	unreviewed	588596	cellular organisms, Eukaryota, Opisthokonta, Fungi, Fungi incertae sedis, Mucoromycota, Glomeromycotina, Glomeromycetes, Glomerales, Glomeraceae, Rhizophagus, Rhizophagus irregularis	Predicted	1 out of 5	CAUTION: The sequence shown here is derived from an EMBL/GenBank/DDBJ whole genome shotgun (WGS) entry which is preliminary data. {ECO:0000313|EMBL:PKB93060.1}.	Non-terminal residue (1)	LLXJ01009070;				2018-04-25	2018-05-23
A0A2N0NEV4	NZ_KI271244.1:382-614	97.4	77	2	0	233	3	28	104	2e-41	175.3	A0A2N0NEV4	A0A2N0NEV4_9GLOM	unreviewed	Uncharacterized protein	RhiirA5_486168	Rhizophagus irregularis	162	unreviewed	588596	cellular organisms, Eukaryota, Opisthokonta, Fungi, Fungi incertae sedis, Mucoromycota, Glomeromycotina, Glomeromycetes, Glomerales, Glomeraceae, Rhizophagus, Rhizophagus irregularis	Predicted	1 out of 5	CAUTION: The sequence shown here is derived from an EMBL/GenBank/DDBJ whole genome shotgun (WGS) entry which is preliminary data. {ECO:0000313|EMBL:PKB93059.1}.		LLXJ01009070;				2018-04-25	2018-05-23
A0A2N0NSC0	NZ_ALQK01000043.1:644-2603	100	70	0	0	1941	1732	1	70	2e-30	142.5	A0A2N0NSC0	A0A2N0NSC0_9GLOM	unreviewed	Uncharacterized protein (Fragment)	RhiirA5_247088	Rhizophagus irregularis	70	unreviewed	588596	cellular organisms, Eukaryota, Opisthokonta, Fungi, Fungi incertae sedis, Mucoromycota, Glomeromycotina, Glomeromycetes, Glomerales, Glomeraceae, Rhizophagus, Rhizophagus irregularis	Predicted	1 out of 5	CAUTION: The sequence shown here is derived from an EMBL/GenBank/DDBJ whole genome shotgun (WGS) entry which is preliminary data. {ECO:0000313|EMBL:PKB97479.1}.	Non-terminal residue (2)	LLXJ01003185;				2018-04-25	2018-05-23
A0A2N0QH64	NZ_CZJT01000051.1:698-3990	95.29	85	4	0	327	73	1	85	3e-38	169.9	A0A2N0QH64	A0A2N0QH64_9GLOM	unreviewed	Uncharacterized protein	RhiirA1_486465	Rhizophagus irregularis	103	unreviewed	588596	cellular organisms, Eukaryota, Opisthokonta, Fungi, Fungi incertae sedis, Mucoromycota, Glomeromycotina, Glomeromycetes, Glomerales, Glomeraceae, Rhizophagus, Rhizophagus irregularis	Predicted	1 out of 5	CAUTION: The sequence shown here is derived from an EMBL/GenBank/DDBJ whole genome shotgun (WGS) entry which is preliminary data. {ECO:0000313|EMBL:PKC50398.1}.		LLXH01010113;				2018-04-25	2018-05-23
A0A2N0VMJ6	NZ_PIXJ01000070.1:3-406	100	90	0	0	130	399	1	90	3e-42	178.3	A0A2N0VMJ6	A0A2N0VMJ6_9STAP	unreviewed	Uncharacterized protein	CW718_12160	Macrococcus caseolyticus	90	unreviewed	69966	cellular organisms, Bacteria, Terrabacteria group, Firmicutes, Bacilli, Bacillales, Staphylococcaceae, Macrococcus, Macrococcus caseolyticus	Predicted	1 out of 5	CAUTION: The sequence shown here is derived from an EMBL/GenBank/DDBJ whole genome shotgun (WGS) entry which is preliminary data. {ECO:0000313|EMBL:PKE15972.1}.	Transmembrane (2)	PIXJ01000070;				2018-04-25	2018-06-20
A0A2N0Y0J3	NZ_ADJX01000023.1:1-161	100	31	0	0	161	69	30	60	6e-08	63.9	A0A2N0Y0J3	A0A2N0Y0J3_9BACI	unreviewed	Uncharacterized protein (Fragment)	CW306_27415	Bacillus sp. BA3	60	unreviewed	2057910	cellular organisms, Bacteria, Terrabacteria group, Firmicutes, Bacilli, Bacillales, Bacillaceae, Bacillus, Bacillus sp. BA3	Predicted	1 out of 5	CAUTION: The sequence shown here is derived from an EMBL/GenBank/DDBJ whole genome shotgun (WGS) entry which is preliminary data. {ECO:0000313|EMBL:PKF85543.1}.	Non-terminal residue (1)	PIZR01000046;				2018-04-25	2018-04-25
A0A2N0Y0L4	NZ_BFCS01000233.1:352-522	100	51	0	0	3	155	11	61	6e-24	117.1	A0A2N0Y0L4	A0A2N0Y0L4_9BACI	unreviewed	Uncharacterized protein	CW306_27385	Bacillus sp. BA3	61	unreviewed	2057910	cellular organisms, Bacteria, Terrabacteria group, Firmicutes, Bacilli, Bacillales, Bacillaceae, Bacillus, Bacillus sp. BA3	Predicted	1 out of 5	CAUTION: The sequence shown here is derived from an EMBL/GenBank/DDBJ whole genome shotgun (WGS) entry which is preliminary data. {ECO:0000313|EMBL:PKF85546.1}.		PIZR01000039;				2018-04-25	2018-04-25
A0A2N0Y0N9	NZ_FRWP01001030.1:1-160	100	39	0	0	158	42	38	86	4e-11	74.3	A0A2N0Y0N9	A0A2N0Y0N9_9BACI	unreviewed	Uncharacterized protein	CW306_27390	Bacillus sp. BA3	86	unreviewed	2057910	cellular organisms, Bacteria, Terrabacteria group, Firmicutes, Bacilli, Bacillales, Bacillaceae, Bacillus, Bacillus sp. BA3	Predicted	1 out of 5	CAUTION: The sequence shown here is derived from an EMBL/GenBank/DDBJ whole genome shotgun (WGS) entry which is preliminary data. {ECO:0000313|EMBL:PKF85547.1}.	Sequence uncertainty (1)	PIZR01000039;				2018-04-25	2018-05-23
A0A2N0Y0P1	NZ_BFCQ01000125.1:148-308	96.08	51	2	0	155	3	2	52	7e-22	110.2	A0A2N0Y0P1	A0A2N0Y0P1_9BACI	unreviewed	Uncharacterized protein (Fragment)	CW306_27420	Bacillus sp. BA3	93	unreviewed	2057910	cellular organisms, Bacteria, Terrabacteria group, Firmicutes, Bacilli, Bacillales, Bacillaceae, Bacillus, Bacillus sp. BA3	Predicted	1 out of 5	CAUTION: The sequence shown here is derived from an EMBL/GenBank/DDBJ whole genome shotgun (WGS) entry which is preliminary data. {ECO:0000313|EMBL:PKF85541.1}.	Non-terminal residue (1); Sequence uncertainty (1)	PIZR01000047;				2018-04-25	2018-04-25
A0A2N0Y0Q4	NZ_CMHG01000050.1:5-174	98.21	56	1	0	2	169	11	66	1e-20	106.3	A0A2N0Y0Q4	A0A2N0Y0Q4_9BACI	unreviewed	Uncharacterized protein (Fragment)	CW306_27425	Bacillus sp. BA3	75	unreviewed	2057910	cellular organisms, Bacteria, Terrabacteria group, Firmicutes, Bacilli, Bacillales, Bacillaceae, Bacillus, Bacillus sp. BA3	Predicted	1 out of 5	CAUTION: The sequence shown here is derived from an EMBL/GenBank/DDBJ whole genome shotgun (WGS) entry which is preliminary data. {ECO:0000313|EMBL:PKF85542.1}.	Non-terminal residue (1); Sequence uncertainty (2)	PIZR01000047;				2018-04-25	2018-04-25
A0A2N1LCA5	NZ_KZ794899.1:444-612	97.67	43	1	0	39	167	5	47	7e-17	93.6	A0A2N1LCA5	A0A2N1LCA5_9GLOM	unreviewed	Uncharacterized protein	RhiirC2_834450	Rhizophagus irregularis	106	unreviewed	588596	cellular organisms, Eukaryota, Opisthokonta, Fungi, Fungi incertae sedis, Mucoromycota, Glomeromycotina, Glomeromycetes, Glomerales, Glomeraceae, Rhizophagus, Rhizophagus irregularis	Predicted	1 out of 5	CAUTION: The sequence shown here is derived from an EMBL/GenBank/DDBJ whole genome shotgun (WGS) entry which is preliminary data. {ECO:0000313|EMBL:PKK47012.1}.		LLXL01008811;				2018-04-25	2018-05-23
A0A2N1M582	NZ_AKPL01000008.1:1-2797	100	91	0	0	857	1129	1	91	2e-42	183.3	A0A2N1M582	A0A2N1M582_9GLOM	unreviewed	Uncharacterized protein (Fragment)	RhiirC2_626477	Rhizophagus irregularis	91	unreviewed	588596	cellular organisms, Eukaryota, Opisthokonta, Fungi, Fungi incertae sedis, Mucoromycota, Glomeromycotina, Glomeromycetes, Glomerales, Glomeraceae, Rhizophagus, Rhizophagus irregularis	Predicted	1 out of 5	CAUTION: The sequence shown here is derived from an EMBL/GenBank/DDBJ whole genome shotgun (WGS) entry which is preliminary data. {ECO:0000313|EMBL:PKK56807.1}.	Domain (1); Non-terminal residue (2)	LLXL01005091;				2018-04-25	2018-05-23
A0A2N4T6G0	NZ_MUEI01000029.1:1-326	100	65	0	0	1	195	1	65	2e-30	138.7	A0A2N4T6G0	A0A2N4T6G0_9BACI	unreviewed	Uncharacterized protein (Fragment)	BV582_23000	Bacillus paralicheniformis	65	unreviewed	1648923	cellular organisms, Bacteria, Terrabacteria group, Firmicutes, Bacilli, Bacillales, Bacillaceae, Bacillus, Bacillus subtilis group, Bacillus paralicheniformis	Predicted	1 out of 5	CAUTION: The sequence shown here is derived from an EMBL/GenBank/DDBJ whole genome shotgun (WGS) entry which is preliminary data. {ECO:0000313|EMBL:PLC13823.1}.	Non-terminal residue (1)	MUEI01000029;				2018-04-25	2018-04-25
A0A2N4T6G5	NZ_MUEI01000037.1:1-412	100	137	0	0	2	412	1	137	4e-71	274.2	A0A2N4T6G5	A0A2N4T6G5_9BACI	unreviewed	Uncharacterized protein (Fragment)	BV582_23020	Bacillus paralicheniformis	137	unreviewed	1648923	cellular organisms, Bacteria, Terrabacteria group, Firmicutes, Bacilli, Bacillales, Bacillaceae, Bacillus, Bacillus subtilis group, Bacillus paralicheniformis	Predicted	1 out of 5	CAUTION: The sequence shown here is derived from an EMBL/GenBank/DDBJ whole genome shotgun (WGS) entry which is preliminary data. {ECO:0000313|EMBL:PLC13819.1}.	Coiled coil (1); Non-terminal residue (2)	MUEI01000037;				2018-04-25	2018-05-23
A0A2N4T6H3	NZ_MUEI01000038.1:1-399	100	81	0	0	139	381	14	94	2e-37	162.5	A0A2N4T6H3	A0A2N4T6H3_9BACI	unreviewed	Uncharacterized protein	BV582_23025	Bacillus paralicheniformis	94	unreviewed	1648923	cellular organisms, Bacteria, Terrabacteria group, Firmicutes, Bacilli, Bacillales, Bacillaceae, Bacillus, Bacillus subtilis group, Bacillus paralicheniformis	Predicted	1 out of 5	CAUTION: The sequence shown here is derived from an EMBL/GenBank/DDBJ whole genome shotgun (WGS) entry which is preliminary data. {ECO:0000313|EMBL:PLC13818.1}.		MUEI01000038;				2018-04-25	2018-04-25
A0A2N4T6H4	NZ_MUEI01000026.1:1-479	98.82	85	1	0	216	470	1	85	2e-43	182.2	A0A2N4T6H4	A0A2N4T6H4_9BACI	unreviewed	Uncharacterized protein	BV582_22995	Bacillus paralicheniformis	85	unreviewed	1648923	cellular organisms, Bacteria, Terrabacteria group, Firmicutes, Bacilli, Bacillales, Bacillaceae, Bacillus, Bacillus subtilis group, Bacillus paralicheniformis	Predicted	1 out of 5	CAUTION: The sequence shown here is derived from an EMBL/GenBank/DDBJ whole genome shotgun (WGS) entry which is preliminary data. {ECO:0000313|EMBL:PLC13824.1}.		MUEI01000026;				2018-04-25	2018-04-25
A0A2N4T6H7	NZ_CSTK01000035.1:1-428	100	80	0	0	256	17	1	80	3e-40	171.8	A0A2N4T6H7	A0A2N4T6H7_9BACI	unreviewed	Uncharacterized protein	BV582_22955	Bacillus paralicheniformis	80	unreviewed	1648923	cellular organisms, Bacteria, Terrabacteria group, Firmicutes, Bacilli, Bacillales, Bacillaceae, Bacillus, Bacillus subtilis group, Bacillus paralicheniformis	Predicted	1 out of 5	CAUTION: The sequence shown here is derived from an EMBL/GenBank/DDBJ whole genome shotgun (WGS) entry which is preliminary data. {ECO:0000313|EMBL:PLC13825.1}.	Domain (1)	MUEI01000014;				2018-04-25	2018-05-23
A0A2N6IBH6	NZ_PEBS01000208.1:1-396	100	62	0	0	186	1	1	62	1e-31	143.3	A0A2N6IBH6	A0A2N6IBH6_9BURK	unreviewed	Uncharacterized protein (Fragment)	CSZ94_27410	Janthinobacterium sp. ROICE36	62	unreviewed	2048670	cellular organisms, Bacteria, Proteobacteria, Betaproteobacteria, Burkholderiales, Oxalobacteraceae, Janthinobacterium, Janthinobacterium sp. ROICE36	Predicted	1 out of 5	CAUTION: The sequence shown here is derived from an EMBL/GenBank/DDBJ whole genome shotgun (WGS) entry which is preliminary data. {ECO:0000313|EMBL:PLY39268.1}.	Non-terminal residue (1)	PEBS01000208;				2018-04-25	2018-04-25
A0A2N6IBK7	NZ_PEBS01000192.1:1-721	100	240	0	0	721	2	1	240	1e-140	506.9	A0A2N6IBK7	A0A2N6IBK7_9BURK	unreviewed	Endonuclease (Fragment)	CSZ94_27320	Janthinobacterium sp. ROICE36	240	unreviewed	2048670	cellular organisms, Bacteria, Proteobacteria, Betaproteobacteria, Burkholderiales, Oxalobacteraceae, Janthinobacterium, Janthinobacterium sp. ROICE36	Predicted	1 out of 5	CAUTION: The sequence shown here is derived from an EMBL/GenBank/DDBJ whole genome shotgun (WGS) entry which is preliminary data. {ECO:0000313|EMBL:PLY39279.1}.	Non-terminal residue (2)	PEBS01000192;				2018-04-25	2018-06-20
A0A2N7YDK2	NZ_POEC01000230.1:1-267	100	88	0	0	3	266	1	88	1e-43	182.6	A0A2N7YDK2	A0A2N7YDK2_9PSED	unreviewed	Uncharacterized protein (Fragment)	C1Y27_31460	Pseudomonas sp. GW704-F2	88	unreviewed	2070577	cellular organisms, Bacteria, Proteobacteria, Gammaproteobacteria, Pseudomonadales, Pseudomonadaceae, Pseudomonas, Pseudomonas sp. GW704-F2	Predicted	1 out of 5	CAUTION: The sequence shown here is derived from an EMBL/GenBank/DDBJ whole genome shotgun (WGS) entry which is preliminary data. {ECO:0000313|EMBL:PMV16041.1}.	Domain (1); Non-terminal residue (2)	POEC01000230;				2018-04-25	2018-05-23
A0A2R9SK06	NZ_QLYU01000057.1:996-1223	100	27	0	0	1	81	41	67	5e-08	64.3	A0A2R9SK06	A0A2R9SK06_MYCTX	unreviewed	Uncharacterized protein	ERS027651_04084	Mycobacterium tuberculosis	76	unreviewed	1773	cellular organisms, Bacteria, Terrabacteria group, Actinobacteria, Actinobacteria (high G+C Gram-positive bacteria), Corynebacteriales, Mycobacteriaceae, Mycobacterium, Mycobacterium tuberculosis complex, Mycobacterium tuberculosis	Predicted	1 out of 5			CIEA01000093;				2018-06-20	2018-06-20
A0A2R9SK48	NZ_CQSC01000215.1:1439-1644	100	57	0	0	179	9	1	57	4e-26	124.4	A0A2R9SK48	A0A2R9SK48_MYCTX	unreviewed	Uncharacterized protein	ERS027651_04085	Mycobacterium tuberculosis	57	unreviewed	1773	cellular organisms, Bacteria, Terrabacteria group, Actinobacteria, Actinobacteria (high G+C Gram-positive bacteria), Corynebacteriales, Mycobacteriaceae, Mycobacterium, Mycobacterium tuberculosis complex, Mycobacterium tuberculosis	Predicted	1 out of 5			CIEA01000093;				2018-06-20	2018-06-20
A0A2R9SKI5	NZ_FRWH01000198.1:176-411	100	67	0	0	222	22	1	67	6e-22	110.5	A0A2R9SKI5	A0A2R9SKI5_MYCTX	unreviewed	Uncharacterized protein	ERS027651_04087	Mycobacterium tuberculosis	67	unreviewed	1773	cellular organisms, Bacteria, Terrabacteria group, Actinobacteria, Actinobacteria (high G+C Gram-positive bacteria), Corynebacteriales, Mycobacteriaceae, Mycobacterium, Mycobacterium tuberculosis complex, Mycobacterium tuberculosis	Predicted	1 out of 5			CIEA01000093;				2018-06-20	2018-06-20
A0A2R9SKM7	NZ_CGZQ01000070.1:415-635	100	69	0	0	211	5	1	69	6e-33	147.1	A0A2R9SKM7	A0A2R9SKM7_MYCTX	unreviewed	Uncharacterized protein	ERS027651_04138	Mycobacterium tuberculosis	69	unreviewed	1773	cellular organisms, Bacteria, Terrabacteria group, Actinobacteria, Actinobacteria (high G+C Gram-positive bacteria), Corynebacteriales, Mycobacteriaceae, Mycobacterium, Mycobacterium tuberculosis complex, Mycobacterium tuberculosis	Predicted	1 out of 5			CIEA01000119;				2018-06-20	2018-06-20
A0A2R9SKN6	NZ_KZ794899.1:444-612	97.96	49	1	0	21	167	1	49	8e-21	106.7	A0A2R9SKN6	A0A2R9SKN6_MYCTX	unreviewed	Uncharacterized protein	ERS027651_04158	Mycobacterium tuberculosis	115	unreviewed	1773	cellular organisms, Bacteria, Terrabacteria group, Actinobacteria, Actinobacteria (high G+C Gram-positive bacteria), Corynebacteriales, Mycobacteriaceae, Mycobacterium, Mycobacterium tuberculosis complex, Mycobacterium tuberculosis	Predicted	1 out of 5			CIEA01000144;				2018-06-20	2018-06-20
A0A2R9SKU3	NZ_NQQK01000038.1:433-625	100	64	0	0	193	2	24	87	9e-32	143.3	A0A2R9SKU3	A0A2R9SKU3_MYCTX	unreviewed	Uncharacterized protein	ERS027651_04090	Mycobacterium tuberculosis	89	unreviewed	1773	cellular organisms, Bacteria, Terrabacteria group, Actinobacteria, Actinobacteria (high G+C Gram-positive bacteria), Corynebacteriales, Mycobacteriaceae, Mycobacterium, Mycobacterium tuberculosis complex, Mycobacterium tuberculosis	Predicted	1 out of 5			CIEA01000093;				2018-06-20	2018-06-20
A0A2R9SKW8	NZ_FRWP01001030.1:855-1079	100	39	0	0	29	145	1	39	1e-14	86.7	A0A2R9SKW8	A0A2R9SKW8_MYCTX	unreviewed	Uncharacterized protein	ERS027651_04081	Mycobacterium tuberculosis	39	unreviewed	1773	cellular organisms, Bacteria, Terrabacteria group, Actinobacteria, Actinobacteria (high G+C Gram-positive bacteria), Corynebacteriales, Mycobacteriaceae, Mycobacterium, Mycobacterium tuberculosis complex, Mycobacterium tuberculosis	Predicted	1 out of 5			CIEA01000093;				2018-06-20	2018-06-20
A0A2R9SKW9	NZ_MOHL01000098.1:1490-1673	100	45	0	0	183	49	3	47	6e-22	110.5	A0A2R9SKW9	A0A2R9SKW9_MYCTX	unreviewed	Uncharacterized protein	ERS027651_04088	Mycobacterium tuberculosis	47	unreviewed	1773	cellular organisms, Bacteria, Terrabacteria group, Actinobacteria, Actinobacteria (high G+C Gram-positive bacteria), Corynebacteriales, Mycobacteriaceae, Mycobacterium, Mycobacterium tuberculosis complex, Mycobacterium tuberculosis	Predicted	1 out of 5			CIEA01000093;				2018-06-20	2018-06-20
A0A2R9SKX0	NZ_KV810693.1:1-142	100	30	0	0	142	53	39	68	1e-10	73.2	A0A2R9SKX0	A0A2R9SKX0_MYCTX	unreviewed	Uncharacterized protein	ERS027651_04141	Mycobacterium tuberculosis	69	unreviewed	1773	cellular organisms, Bacteria, Terrabacteria group, Actinobacteria, Actinobacteria (high G+C Gram-positive bacteria), Corynebacteriales, Mycobacteriaceae, Mycobacterium, Mycobacterium tuberculosis complex, Mycobacterium tuberculosis	Predicted	1 out of 5			CIEA01000119;				2018-06-20	2018-06-20
A0A2R9SKX3	NZ_QKVX01000015.1:741-904	100	54	0	0	2	163	22	75	5e-29	134	A0A2R9SKX3	A0A2R9SKX3_MYCTX	unreviewed	Uncharacterized protein	ERS027651_04091	Mycobacterium tuberculosis	99	unreviewed	1773	cellular organisms, Bacteria, Terrabacteria group, Actinobacteria, Actinobacteria (high G+C Gram-positive bacteria), Corynebacteriales, Mycobacteriaceae, Mycobacterium, Mycobacterium tuberculosis complex, Mycobacterium tuberculosis	Predicted	1 out of 5			CIEA01000093;				2018-06-20	2018-06-20
A0A2R9SKX6	NZ_FRWH01000166.1:211-406	100	58	0	0	174	1	1	58	2e-29	135.2	A0A2R9SKX6	A0A2R9SKX6_MYCTX	unreviewed	Uncharacterized protein	ERS027651_04089	Mycobacterium tuberculosis	62	unreviewed	1773	cellular organisms, Bacteria, Terrabacteria group, Actinobacteria, Actinobacteria (high G+C Gram-positive bacteria), Corynebacteriales, Mycobacteriaceae, Mycobacterium, Mycobacterium tuberculosis complex, Mycobacterium tuberculosis	Predicted	1 out of 5			CIEA01000093;				2018-06-20	2018-06-20
A0A2R9SKX8	NZ_CIEA01000101.1:1-1286	100	304	0	0	159	1070	1	304	7e-160	572	A0A2R9SKX8	A0A2R9SKX8_MYCTX	unreviewed	L1 transposable element	ERS027651_04109	Mycobacterium tuberculosis	304	unreviewed	1773	cellular organisms, Bacteria, Terrabacteria group, Actinobacteria, Actinobacteria (high G+C Gram-positive bacteria), Corynebacteriales, Mycobacteriaceae, Mycobacterium, Mycobacterium tuberculosis complex, Mycobacterium tuberculosis	Predicted	1 out of 5		Coiled coil (2); Domain (2)	CIEA01000101;				2018-06-20	2018-09-12
A0A2R9SKY0	NZ_LXQV01000030.1:4-154	100	48	0	0	151	8	19	104	3e-14	84.7	A0A2R9SKY0	A0A2R9SKY0_MYCTX	unreviewed	Uncharacterized protein	ERS027651_04162	Mycobacterium tuberculosis	104	unreviewed	1773	cellular organisms, Bacteria, Terrabacteria group, Actinobacteria, Actinobacteria (high G+C Gram-positive bacteria), Corynebacteriales, Mycobacteriaceae, Mycobacterium, Mycobacterium tuberculosis complex, Mycobacterium tuberculosis	Predicted	1 out of 5			CIEA01000150;				2018-06-20	2018-06-20
A0A2R9SKZ2	NZ_MOHL01000098.1:1-160	95.92	49	2	0	159	13	3	51	2e-25	122.1	A0A2R9SKZ2	A0A2R9SKZ2_MYCTX	unreviewed	Uncharacterized protein	ERS027651_04139	Mycobacterium tuberculosis	71	unreviewed	1773	cellular organisms, Bacteria, Terrabacteria group, Actinobacteria, Actinobacteria (high G+C Gram-positive bacteria), Corynebacteriales, Mycobacteriaceae, Mycobacterium, Mycobacterium tuberculosis complex, Mycobacterium tuberculosis	Predicted	1 out of 5			CIEA01000119;				2018-06-20	2018-06-20
A0A2R9SKZ9	NZ_NTTD01000152.1:1-204	100	35	0	0	3	107	28	62	2e-12	79	A0A2R9SKZ9	A0A2R9SKZ9_MYCTX	unreviewed	Uncharacterized protein	ERS027651_04140	Mycobacterium tuberculosis	62	unreviewed	1773	cellular organisms, Bacteria, Terrabacteria group, Actinobacteria, Actinobacteria (high G+C Gram-positive bacteria), Corynebacteriales, Mycobacteriaceae, Mycobacterium, Mycobacterium tuberculosis complex, Mycobacterium tuberculosis	Predicted	1 out of 5			CIEA01000119;				2018-06-20	2018-06-20
A0A2R9SL00	NZ_CIEA01000144.1:413-577	100	31	0	0	16	108	1	31	3e-08	65.1	A0A2R9SL00	A0A2R9SL00_MYCTX	unreviewed	Uncharacterized protein	ERS027651_04159	Mycobacterium tuberculosis	31	unreviewed	1773	cellular organisms, Bacteria, Terrabacteria group, Actinobacteria, Actinobacteria (high G+C Gram-positive bacteria), Corynebacteriales, Mycobacteriaceae, Mycobacterium, Mycobacterium tuberculosis complex, Mycobacterium tuberculosis	Predicted	1 out of 5			CIEA01000144;				2018-06-20	2018-06-20
A0A2R9SL10	NZ_JRJL01000199.1:316-521	100	29	0	0	204	118	16	44	5e-11	74.3	A0A2R9SL10	A0A2R9SL10_MYCTX	unreviewed	Uncharacterized protein	ERS027651_04082	Mycobacterium tuberculosis	44	unreviewed	1773	cellular organisms, Bacteria, Terrabacteria group, Actinobacteria, Actinobacteria (high G+C Gram-positive bacteria), Corynebacteriales, Mycobacteriaceae, Mycobacterium, Mycobacterium tuberculosis complex, Mycobacterium tuberculosis	Predicted	1 out of 5			CIEA01000093;				2018-06-20	2018-06-20
A0A2R9SL17	NZ_AUNH01000085.1:140-306	100	55	0	0	3	167	33	112	2e-22	112.1	A0A2R9SL17	A0A2R9SL17_MYCTX	unreviewed	Uncharacterized protein	ERS027651_04153	Mycobacterium tuberculosis	163	unreviewed	1773	cellular organisms, Bacteria, Terrabacteria group, Actinobacteria, Actinobacteria (high G+C Gram-positive bacteria), Corynebacteriales, Mycobacteriaceae, Mycobacterium, Mycobacterium tuberculosis complex, Mycobacterium tuberculosis	Predicted	1 out of 5			CIEA01000127;				2018-06-20	2018-06-20
A0A2S2N693	NZ_NITL01000064.1:1-684	97.56	123	3	0	564	196	1	123	2e-61	243	A0A2S2N693	A0A2S2N693_9ZZZZ	unreviewed	LINE-1 retrotransposable element ORF2 protein (Fragment)		bird metagenome	123	unreviewed	1833763	unclassified sequences, metagenomes, organismal metagenomes, bird metagenome	Predicted	1 out of 5		Non-terminal residue (2)	GGMT01000750;				2018-07-18	2018-07-18
A0A2S3RHD1	NZ_ALQK01000043.1:644-2603	98.6	143	2	0	762	334	1	143	4e-80	307.8	A0A2S3RHD1	A0A2S3RHD1_VIBVL	unreviewed	Endonuclease (Fragment)	CRN59_21340	Vibrio vulnificus	143	unreviewed	672	cellular organisms, Bacteria, Proteobacteria, Gammaproteobacteria, Vibrionales, Vibrionaceae, Vibrio, Vibrio vulnificus	Predicted	1 out of 5	CAUTION: The sequence shown here is derived from an EMBL/GenBank/DDBJ whole genome shotgun (WGS) entry which is preliminary data. {ECO:0000313|EMBL:POB68196.1}.	Non-terminal residue (2)	PDFZ01001066;				2018-07-18	2018-09-12
A0A2S3S2K0	NZ_PDGQ01000076.1:1-690	100	157	0	0	581	111	1	157	2e-93	349.7	A0A2S3S2K0	A0A2S3S2K0_VIBVL	unreviewed	Uncharacterized protein	CRN46_07765	Vibrio vulnificus	157	unreviewed	672	cellular organisms, Bacteria, Proteobacteria, Gammaproteobacteria, Vibrionales, Vibrionaceae, Vibrio, Vibrio vulnificus	Predicted	1 out of 5	CAUTION: The sequence shown here is derived from an EMBL/GenBank/DDBJ whole genome shotgun (WGS) entry which is preliminary data. {ECO:0000313|EMBL:POC24587.1}.	Domain (1)	PDGQ01000076;				2018-07-18	2018-09-12
A0A2S3SDX3	NZ_PDGJ01000240.1:1-478	100	131	0	0	395	3	1	131	3e-68	265	A0A2S3SDX3	A0A2S3SDX3_VIBVL	unreviewed	Endonuclease (Fragment)	CRN32_12170	Vibrio vulnificus	131	unreviewed	672	cellular organisms, Bacteria, Proteobacteria, Gammaproteobacteria, Vibrionales, Vibrionaceae, Vibrio, Vibrio vulnificus	Predicted	1 out of 5	CAUTION: The sequence shown here is derived from an EMBL/GenBank/DDBJ whole genome shotgun (WGS) entry which is preliminary data. {ECO:0000313|EMBL:POC53628.1}.	Domain (1); Non-terminal residue (1)	PDGJ01000240;				2018-07-18	2018-09-12
A0A2S3SEF4	NZ_PDGJ01000226.1:61-231	100	57	0	0	171	1	22	78	3e-24	118.2	A0A2S3SEF4	A0A2S3SEF4_VIBVL	unreviewed	Uncharacterized protein (Fragment)	CRN32_11035	Vibrio vulnificus	98	unreviewed	672	cellular organisms, Bacteria, Proteobacteria, Gammaproteobacteria, Vibrionales, Vibrionaceae, Vibrio, Vibrio vulnificus	Predicted	1 out of 5	CAUTION: The sequence shown here is derived from an EMBL/GenBank/DDBJ whole genome shotgun (WGS) entry which is preliminary data. {ECO:0000313|EMBL:POC54417.1}.	Non-terminal residue (1)	PDGJ01000226;				2018-07-18	2018-07-18
A0A2S3SI16	NZ_PDGJ01000068.1:139-304	100	48	0	0	1	144	12	94	4e-19	100.9	A0A2S3SI16	A0A2S3SI16_VIBVL	unreviewed	Uncharacterized protein	CRN32_04260	Vibrio vulnificus	94	unreviewed	672	cellular organisms, Bacteria, Proteobacteria, Gammaproteobacteria, Vibrionales, Vibrionaceae, Vibrio, Vibrio vulnificus	Predicted	1 out of 5	CAUTION: The sequence shown here is derived from an EMBL/GenBank/DDBJ whole genome shotgun (WGS) entry which is preliminary data. {ECO:0000313|EMBL:POC59819.1}.		PDGJ01000068;				2018-07-18	2018-07-18
A0A2S4EWH0	NZ_PQCM01000036.1:179-492	100	46	0	0	1	138	11	56	1e-18	99.8	A0A2S4EWH0	A0A2S4EWH0_BACIU	unreviewed	Uncharacterized protein	C1T28_20855	Bacillus subtilis	63	unreviewed	1423	cellular organisms, Bacteria, Terrabacteria group, Firmicutes, Bacilli, Bacillales, Bacillaceae, Bacillus, Bacillus subtilis group, Bacillus subtilis	Predicted	1 out of 5	CAUTION: The sequence shown here is derived from an EMBL/GenBank/DDBJ whole genome shotgun (WGS) entry which is preliminary data. {ECO:0000313|EMBL:POO72353.1}.		PQCM01000036;				2018-07-18	2018-07-18
A0A2S4I728	NZ_NBAN01000149.1:165-616	98.57	70	1	0	433	224	1	70	1e-33	149.8	A0A2S4I728	A0A2S4I728_PSEA0	unreviewed	Uncharacterized protein	CXB39_30605	Pseudomonas amygdali pv. morsprunorum	70	unreviewed	129138	cellular organisms, Bacteria, Proteobacteria, Gammaproteobacteria, Pseudomonadales, Pseudomonadaceae, Pseudomonas, Pseudomonas syringae group, Pseudomonas syringae group genomosp. 2, Pseudomonas amygdali, Pseudomonas amygdali pv. morsprunorum	Predicted	1 out of 5	CAUTION: The sequence shown here is derived from an EMBL/GenBank/DDBJ whole genome shotgun (WGS) entry which is preliminary data. {ECO:0000313|EMBL:POP84544.1}.	Domain (1)	NBAN01000149;				2018-07-18	2018-09-12
A0A2S5GHI3	NZ_PREU01000055.1:1-513	99.35	153	1	0	5	463	1	153	2e-90	338.6	A0A2S5GHI3	A0A2S5GHI3_9BURK	unreviewed	Uncharacterized protein	C4E15_30275	Achromobacter spanius	153	unreviewed	217203	cellular organisms, Bacteria, Proteobacteria, Betaproteobacteria, Burkholderiales, Alcaligenaceae, Achromobacter, Achromobacter spanius	Predicted	1 out of 5	CAUTION: The sequence shown here is derived from an EMBL/GenBank/DDBJ whole genome shotgun (WGS) entry which is preliminary data. {ECO:0000313|EMBL:PPA72512.1}.	Domain (1)	PREU01000055;				2018-07-18	2018-09-12
A0A2S5GHR8	NZ_PREU01000049.1:1-546	100	181	0	0	3	545	1	181	1e-100	372.5	A0A2S5GHR8	A0A2S5GHR8_9BURK	unreviewed	Endonuclease (Fragment)	C4E15_30245	Achromobacter spanius	181	unreviewed	217203	cellular organisms, Bacteria, Proteobacteria, Betaproteobacteria, Burkholderiales, Alcaligenaceae, Achromobacter, Achromobacter spanius	Predicted	1 out of 5	CAUTION: The sequence shown here is derived from an EMBL/GenBank/DDBJ whole genome shotgun (WGS) entry which is preliminary data. {ECO:0000313|EMBL:PPA72516.1}.	Domain (1); Non-terminal residue (2)	PREU01000049;				2018-07-18	2018-09-12
A0A2S6WF00	NZ_MULI01000170.1:3-1881	100	138	0	0	845	1258	1	138	1e-73	286.6	A0A2S6WF00	A0A2S6WF00_9ACTN	unreviewed	Uncharacterized protein	BZZ08_07390	Streptomyces sp. MH60	138	unreviewed	1940758	cellular organisms, Bacteria, Terrabacteria group, Actinobacteria, Actinobacteria (high G+C Gram-positive bacteria), Streptomycetales, Streptomycetaceae, Streptomyces, Streptomyces sp. MH60	Predicted	1 out of 5	CAUTION: The sequence shown here is derived from an EMBL/GenBank/DDBJ whole genome shotgun (WGS) entry which is preliminary data. {ECO:0000313|EMBL:PPS68588.1}.		MULI01000170;				2018-07-18	2018-07-18
A0A2S6WF01	NZ_PYQD01000162.1:1-738	97.21	215	6	0	738	94	60	274	4e-123	448.4	A0A2S6WF01	A0A2S6WF01_9ACTN	unreviewed	Uncharacterized protein	BZZ08_07391	Streptomyces sp. MH60	282	unreviewed	1940758	cellular organisms, Bacteria, Terrabacteria group, Actinobacteria, Actinobacteria (high G+C Gram-positive bacteria), Streptomycetales, Streptomycetaceae, Streptomyces, Streptomyces sp. MH60	Predicted	1 out of 5	CAUTION: The sequence shown here is derived from an EMBL/GenBank/DDBJ whole genome shotgun (WGS) entry which is preliminary data. {ECO:0000313|EMBL:PPS68589.1}.	Domain (1)	MULI01000170;				2018-07-18	2018-09-12
A0A2S9RCQ3	NZ_KZ794899.1:444-612	97.96	49	1	0	21	167	1	49	8e-21	106.7	A0A2S9RCQ3	A0A2S9RCQ3_HAEIF	unreviewed	Uncharacterized protein	BVZ80_00127	Haemophilus influenzae	115	unreviewed	727	cellular organisms, Bacteria, Proteobacteria, Gammaproteobacteria, Pasteurellales, Pasteurellaceae, Haemophilus, Haemophilus influenzae	Predicted	1 out of 5	CAUTION: The sequence shown here is derived from an EMBL/GenBank/DDBJ whole genome shotgun (WGS) entry which is preliminary data. {ECO:0000313|EMBL:PRI57640.1}.		NDZR01000765;				2018-07-18	2018-07-18
A0A2S9RCR4	NZ_KL476634.1:341-537	100	65	0	0	1	195	3	82	5e-30	137.5	A0A2S9RCR4	A0A2S9RCR4_HAEIF	unreviewed	Uncharacterized protein	BVZ80_00128	Haemophilus influenzae	82	unreviewed	727	cellular organisms, Bacteria, Proteobacteria, Gammaproteobacteria, Pasteurellales, Pasteurellaceae, Haemophilus, Haemophilus influenzae	Predicted	1 out of 5	CAUTION: The sequence shown here is derived from an EMBL/GenBank/DDBJ whole genome shotgun (WGS) entry which is preliminary data. {ECO:0000313|EMBL:PRI57641.1}.		NDZR01000765;				2018-07-18	2018-07-18
A0A2S9RCV7	NZ_PJAI01000113.1:102-277	100	34	0	0	75	176	1	34	2e-12	78.6	A0A2S9RCV7	A0A2S9RCV7_HAEIF	unreviewed	Uncharacterized protein	BVZ80_00126	Haemophilus influenzae	65	unreviewed	727	cellular organisms, Bacteria, Proteobacteria, Gammaproteobacteria, Pasteurellales, Pasteurellaceae, Haemophilus, Haemophilus influenzae	Predicted	1 out of 5	CAUTION: The sequence shown here is derived from an EMBL/GenBank/DDBJ whole genome shotgun (WGS) entry which is preliminary data. {ECO:0000313|EMBL:PRI57639.1}.		NDZR01000765;				2018-07-18	2018-07-18
A0A2S9RER8	NZ_JHDV01000053.1:215-394	100	41	0	0	39	161	1	41	6e-19	100.5	A0A2S9RER8	A0A2S9RER8_HAEIF	unreviewed	Uncharacterized protein	BVZ80_00048	Haemophilus influenzae	41	unreviewed	727	cellular organisms, Bacteria, Proteobacteria, Gammaproteobacteria, Pasteurellales, Pasteurellaceae, Haemophilus, Haemophilus influenzae	Predicted	1 out of 5	CAUTION: The sequence shown here is derived from an EMBL/GenBank/DDBJ whole genome shotgun (WGS) entry which is preliminary data. {ECO:0000313|EMBL:PRI62172.1}.		NDZR01000477;				2018-07-18	2018-07-18
A0A2S9RET3	NZ_CKYY01000065.1:509-669	100	34	0	0	108	7	1	34	2e-14	85.5	A0A2S9RET3	A0A2S9RET3_HAEIF	unreviewed	Uncharacterized protein	BVZ80_00047	Haemophilus influenzae	34	unreviewed	727	cellular organisms, Bacteria, Proteobacteria, Gammaproteobacteria, Pasteurellales, Pasteurellaceae, Haemophilus, Haemophilus influenzae	Predicted	1 out of 5	CAUTION: The sequence shown here is derived from an EMBL/GenBank/DDBJ whole genome shotgun (WGS) entry which is preliminary data. {ECO:0000313|EMBL:PRI62171.1}.		NDZR01000477;				2018-07-18	2018-07-18
A0A2S9RHW1	NZ_CKYY01000045.1:1-1995	100	75	0	0	1095	1319	1	75	2e-38	169.1	A0A2S9RHW1	A0A2S9RHW1_HAEIF	unreviewed	Uncharacterized protein	BVZ80_01863	Haemophilus influenzae	75	unreviewed	727	cellular organisms, Bacteria, Proteobacteria, Gammaproteobacteria, Pasteurellales, Pasteurellaceae, Haemophilus, Haemophilus influenzae	Predicted	1 out of 5	CAUTION: The sequence shown here is derived from an EMBL/GenBank/DDBJ whole genome shotgun (WGS) entry which is preliminary data. {ECO:0000313|EMBL:PRI75375.1}.		NDZR01000024;				2018-07-18	2018-07-18
A0A2T0HIK1	NZ_PVUH01000126.1:1-400	98.75	80	1	0	288	49	1	80	8e-40	170.2	A0A2T0HIK1	A0A2T0HIK1_PSEFL	unreviewed	Uncharacterized protein	C7A10_32140	Pseudomonas fluorescens	80	unreviewed	294	cellular organisms, Bacteria, Proteobacteria, Gammaproteobacteria, Pseudomonadales, Pseudomonadaceae, Pseudomonas, Pseudomonas fluorescens group (fluorescent pseudomonads), Pseudomonas fluorescens	Predicted	1 out of 5	CAUTION: The sequence shown here is derived from an EMBL/GenBank/DDBJ whole genome shotgun (WGS) entry which is preliminary data. {ECO:0000313|EMBL:PRW82896.1}.	Domain (1)	PVUH01000126;				2018-07-18	2018-09-12
A0A2T1BM74	NZ_MWRW01000060.1:1-340	100	113	0	0	339	1	1	113	1e-57	229.6	A0A2T1BM74	A0A2T1BM74_CORDP	unreviewed	Uncharacterized protein (Fragment)	BT093_11840	Corynebacterium diphtheriae	113	unreviewed	1717	cellular organisms, Bacteria, Terrabacteria group, Actinobacteria, Actinobacteria (high G+C Gram-positive bacteria), Corynebacteriales, Corynebacteriaceae, Corynebacterium, Corynebacterium diphtheriae	Predicted	1 out of 5	CAUTION: The sequence shown here is derived from an EMBL/GenBank/DDBJ whole genome shotgun (WGS) entry which is preliminary data. {ECO:0000313|EMBL:PSA83243.1}.	Non-terminal residue (2)	MWRW01000060;				2018-07-18	2018-07-18
A0A2T1BQ63	NZ_MWRW01000022.1:1-330	100	109	0	0	2	328	1	109	4e-55	221.1	A0A2T1BQ63	A0A2T1BQ63_CORDP	unreviewed	Uncharacterized protein (Fragment)	BT093_11720	Corynebacterium diphtheriae	115	unreviewed	1717	cellular organisms, Bacteria, Terrabacteria group, Actinobacteria, Actinobacteria (high G+C Gram-positive bacteria), Corynebacteriales, Corynebacteriaceae, Corynebacterium, Corynebacterium diphtheriae	Predicted	1 out of 5	CAUTION: The sequence shown here is derived from an EMBL/GenBank/DDBJ whole genome shotgun (WGS) entry which is preliminary data. {ECO:0000313|EMBL:PSA84297.1}.	Non-terminal residue (2)	MWRW01000022;				2018-07-18	2018-07-18
A0A2T1LQB5	NZ_NDFI01000037.1:332-958	97.35	113	3	0	555	217	1	113	9e-56	224.2	A0A2T1LQB5	A0A2T1LQB5_9CHRO	unreviewed	Uncharacterized protein	C7H19_25055	Aphanothece hegewaldii CCALA 016	113	unreviewed	2107694	cellular organisms, Bacteria, Terrabacteria group, Cyanobacteria/Melainabacteria group, Cyanobacteria, Oscillatoriophycideae, Chroococcales, Aphanothecaceae, Aphanothece, Aphanothece hegewaldii, Aphanothece hegewaldii CCALA 016	Predicted	1 out of 5	CAUTION: The sequence shown here is derived from an EMBL/GenBank/DDBJ whole genome shotgun (WGS) entry which is preliminary data. {ECO:0000313|EMBL:PSF27029.1}.	Domain (1)	PXOH01000093;				2018-07-18	2018-10-10
A0A2T1LQD8	NZ_PXOH01000093.1:828-2118	100	336	0	0	283	1290	1	336	2e-190	673.7	A0A2T1LQD8	A0A2T1LQD8_9CHRO	unreviewed	Endonuclease (Fragment)	C7H19_25060	Aphanothece hegewaldii CCALA 016	336	unreviewed	2107694	cellular organisms, Bacteria, Terrabacteria group, Cyanobacteria/Melainabacteria group, Cyanobacteria, Oscillatoriophycideae, Chroococcales, Aphanothecaceae, Aphanothece, Aphanothece hegewaldii, Aphanothece hegewaldii CCALA 016	Predicted	1 out of 5	CAUTION: The sequence shown here is derived from an EMBL/GenBank/DDBJ whole genome shotgun (WGS) entry which is preliminary data. {ECO:0000313|EMBL:PSF27030.1}.	Coiled coil (1); Domain (1); Non-terminal residue (1)	PXOH01000093;				2018-07-18	2018-10-10
A0A2T1LQL7	NZ_CGZQ01000069.1:1-1661	99.28	138	1	0	695	1108	1	138	1e-60	242.7	A0A2T1LQL7	A0A2T1LQL7_9CHRO	unreviewed	Uncharacterized protein (Fragment)	C7H19_25050	Aphanothece hegewaldii CCALA 016	139	unreviewed	2107694	cellular organisms, Bacteria, Terrabacteria group, Cyanobacteria/Melainabacteria group, Cyanobacteria, Oscillatoriophycideae, Chroococcales, Aphanothecaceae, Aphanothece, Aphanothece hegewaldii, Aphanothece hegewaldii CCALA 016	Predicted	1 out of 5	CAUTION: The sequence shown here is derived from an EMBL/GenBank/DDBJ whole genome shotgun (WGS) entry which is preliminary data. {ECO:0000313|EMBL:PSF27028.1}.	Coiled coil (1); Domain (1); Non-terminal residue (1)	PXOH01000093;				2018-07-18	2018-10-10
A0A2T4CKD7	NZ_POWH01000657.1:20-763	98.09	157	3	0	212	682	1	157	2e-90	340.1	A0A2T4CKD7	A0A2T4CKD7_9GAMM	unreviewed	Uncharacterized protein	C9924_01040	Alcanivorax venustensis	157	unreviewed	172371	cellular organisms, Bacteria, Proteobacteria, Gammaproteobacteria, Oceanospirillales, Alcanivoracaceae, Alcanivorax, Alcanivorax venustensis	Predicted	1 out of 5	CAUTION: The sequence shown here is derived from an EMBL/GenBank/DDBJ whole genome shotgun (WGS) entry which is preliminary data. {ECO:0000313|EMBL:PTB81978.1}.	Domain (1)	PYVI01000044;				2018-07-18	2018-09-12
A0A2T4CZV3	NZ_CGZQ01000132.1:56-269	98.55	69	1	0	6	212	4	92	1e-29	136.3	A0A2T4CZV3	A0A2T4CZV3_9CYAN	unreviewed	Uncharacterized protein (Fragment)	C9925_01945	cyanobacterium G8-9	150	unreviewed	2137193	cellular organisms, Bacteria, Terrabacteria group, Cyanobacteria/Melainabacteria group, Cyanobacteria, unclassified Cyanobacteria, unclassified Cyanobacteria (miscellaneous), cyanobacterium G8-9	Predicted	1 out of 5	CAUTION: The sequence shown here is derived from an EMBL/GenBank/DDBJ whole genome shotgun (WGS) entry which is preliminary data. {ECO:0000313|EMBL:PTB87093.1}.	Non-terminal residue (1)	PYVJ01000117;				2018-07-18	2018-07-18
A0A2T4D090	NZ_CMHF01000056.1:710-844	95.24	42	2	0	2	127	19	60	4e-15	87.8	A0A2T4D090	A0A2T4D090_9CYAN	unreviewed	Uncharacterized protein	C9925_01860	cyanobacterium G8-9	95	unreviewed	2137193	cellular organisms, Bacteria, Terrabacteria group, Cyanobacteria/Melainabacteria group, Cyanobacteria, unclassified Cyanobacteria, unclassified Cyanobacteria (miscellaneous), cyanobacterium G8-9	Predicted	1 out of 5	CAUTION: The sequence shown here is derived from an EMBL/GenBank/DDBJ whole genome shotgun (WGS) entry which is preliminary data. {ECO:0000313|EMBL:PTB87230.1}.		PYVJ01000105;				2018-07-18	2018-07-18
A0A2T4D092	NZ_LXQV01000030.1:4-154	100	45	0	0	151	17	19	101	1e-13	82.8	A0A2T4D092	A0A2T4D092_9CYAN	unreviewed	Uncharacterized protein (Fragment)	C9925_01865	cyanobacterium G8-9	101	unreviewed	2137193	cellular organisms, Bacteria, Terrabacteria group, Cyanobacteria/Melainabacteria group, Cyanobacteria, unclassified Cyanobacteria, unclassified Cyanobacteria (miscellaneous), cyanobacterium G8-9	Predicted	1 out of 5	CAUTION: The sequence shown here is derived from an EMBL/GenBank/DDBJ whole genome shotgun (WGS) entry which is preliminary data. {ECO:0000313|EMBL:PTB87231.1}.	Non-terminal residue (1)	PYVJ01000105;				2018-07-18	2018-07-18
A0A2T4D1X5	NZ_JHDX01000043.1:406-576	95.65	46	2	0	171	34	35	80	9e-20	103.2	A0A2T4D1X5	A0A2T4D1X5_9CYAN	unreviewed	Uncharacterized protein	C9925_01385	cyanobacterium G8-9	136	unreviewed	2137193	cellular organisms, Bacteria, Terrabacteria group, Cyanobacteria/Melainabacteria group, Cyanobacteria, unclassified Cyanobacteria, unclassified Cyanobacteria (miscellaneous), cyanobacterium G8-9	Predicted	1 out of 5	CAUTION: The sequence shown here is derived from an EMBL/GenBank/DDBJ whole genome shotgun (WGS) entry which is preliminary data. {ECO:0000313|EMBL:PTB87799.1}.		PYVJ01000048;				2018-07-18	2018-07-18
A0A2T4D1Z5	NZ_JUHX01000041.1:1-1724	98.65	445	6	0	390	1724	1	445	1e-257	897.1	A0A2T4D1Z5	A0A2T4D1Z5_9CYAN	unreviewed	Endonuclease (Fragment)	C9925_01285	cyanobacterium G8-9	622	unreviewed	2137193	cellular organisms, Bacteria, Terrabacteria group, Cyanobacteria/Melainabacteria group, Cyanobacteria, unclassified Cyanobacteria, unclassified Cyanobacteria (miscellaneous), cyanobacterium G8-9	Predicted	1 out of 5	CAUTION: The sequence shown here is derived from an EMBL/GenBank/DDBJ whole genome shotgun (WGS) entry which is preliminary data. {ECO:0000313|EMBL:PTB87841.1}.	Domain (1); Non-terminal residue (1)	PYVJ01000039;				2018-07-18	2018-09-12
A0A2T4D206	NZ_FRWH01000198.1:176-411	98.51	67	1	0	222	22	1	67	1e-21	109.8	A0A2T4D206	A0A2T4D206_9CYAN	unreviewed	Uncharacterized protein	C9925_01235	cyanobacterium G8-9	67	unreviewed	2137193	cellular organisms, Bacteria, Terrabacteria group, Cyanobacteria/Melainabacteria group, Cyanobacteria, unclassified Cyanobacteria, unclassified Cyanobacteria (miscellaneous), cyanobacterium G8-9	Predicted	1 out of 5	CAUTION: The sequence shown here is derived from an EMBL/GenBank/DDBJ whole genome shotgun (WGS) entry which is preliminary data. {ECO:0000313|EMBL:PTB87854.1}.		PYVJ01000036;				2018-07-18	2018-07-18
A0A2T4D208	NZ_CGDU01000466.1:3-156	100	50	0	0	152	3	61	110	3e-22	111.3	A0A2T4D208	A0A2T4D208_9CYAN	unreviewed	Uncharacterized protein	C9925_01245	cyanobacterium G8-9	112	unreviewed	2137193	cellular organisms, Bacteria, Terrabacteria group, Cyanobacteria/Melainabacteria group, Cyanobacteria, unclassified Cyanobacteria, unclassified Cyanobacteria (miscellaneous), cyanobacterium G8-9	Predicted	1 out of 5	CAUTION: The sequence shown here is derived from an EMBL/GenBank/DDBJ whole genome shotgun (WGS) entry which is preliminary data. {ECO:0000313|EMBL:PTB87856.1}.		PYVJ01000036;				2018-07-18	2018-07-18
A0A2T4D210	NZ_FRWH01000166.1:211-406	100	58	0	0	174	1	1	58	2e-29	135.2	A0A2T4D210	A0A2T4D210_9CYAN	unreviewed	Uncharacterized protein	C9925_01240	cyanobacterium G8-9	62	unreviewed	2137193	cellular organisms, Bacteria, Terrabacteria group, Cyanobacteria/Melainabacteria group, Cyanobacteria, unclassified Cyanobacteria, unclassified Cyanobacteria (miscellaneous), cyanobacterium G8-9	Predicted	1 out of 5	CAUTION: The sequence shown here is derived from an EMBL/GenBank/DDBJ whole genome shotgun (WGS) entry which is preliminary data. {ECO:0000313|EMBL:PTB87855.1}.		PYVJ01000036;				2018-07-18	2018-07-18
A0A2T4D212	NZ_BFCK01000844.1:43-233	98.36	61	1	0	9	191	7	72	5e-29	134	A0A2T4D212	A0A2T4D212_9CYAN	unreviewed	Uncharacterized protein	C9925_01230	cyanobacterium G8-9	111	unreviewed	2137193	cellular organisms, Bacteria, Terrabacteria group, Cyanobacteria/Melainabacteria group, Cyanobacteria, unclassified Cyanobacteria, unclassified Cyanobacteria (miscellaneous), cyanobacterium G8-9	Predicted	1 out of 5	CAUTION: The sequence shown here is derived from an EMBL/GenBank/DDBJ whole genome shotgun (WGS) entry which is preliminary data. {ECO:0000313|EMBL:PTB87853.1}.		PYVJ01000036;				2018-07-18	2018-07-18
A0A2T4DAD3	NZ_CIEA01000101.1:1-1286	97.04	203	6	0	462	1070	1	203	1e-106	395.2	A0A2T4DAD3	A0A2T4DAD3_9ALTE	unreviewed	Uncharacterized protein (Fragment)	C9974_16995	Marinobacter sp. B9-2	203	unreviewed	2137198	cellular organisms, Bacteria, Proteobacteria, Gammaproteobacteria, Alteromonadales, Alteromonadaceae, Marinobacter, Marinobacter sp. B9-2	Predicted	1 out of 5	CAUTION: The sequence shown here is derived from an EMBL/GenBank/DDBJ whole genome shotgun (WGS) entry which is preliminary data. {ECO:0000313|EMBL:PTB90738.1}.	Domain (2); Non-terminal residue (1)	PYVH01000412;				2018-07-18	2018-10-10
A0A2T4DWE5	NZ_CKYY01000062.1:835-994	100	53	0	0	2	160	139	191	3e-28	131.3	A0A2T4DWE5	A0A2T4DWE5_9PROT	unreviewed	Uncharacterized protein (Fragment)	C9975_11265	Thalassospira xiamenensis	193	unreviewed	220697	cellular organisms, Bacteria, Proteobacteria, Alphaproteobacteria, Rhodospirillales, Rhodospirillaceae (purple nonsulfur bacteria), Thalassospira, Thalassospira xiamenensis	Predicted	1 out of 5	CAUTION: The sequence shown here is derived from an EMBL/GenBank/DDBJ whole genome shotgun (WGS) entry which is preliminary data. {ECO:0000313|EMBL:PTB98106.1}.	Non-terminal residue (1)	PYVO01000582;				2018-07-18	2018-07-18
A0A2T4DXG8	NZ_LXFS01000052.1:742-4035	98.71	233	3	0	799	1497	1	233	4e-126	461.5	A0A2T4DXG8	A0A2T4DXG8_9PROT	unreviewed	Endonuclease (Fragment)	C9975_10510	Thalassospira xiamenensis	233	unreviewed	220697	cellular organisms, Bacteria, Proteobacteria, Alphaproteobacteria, Rhodospirillales, Rhodospirillaceae (purple nonsulfur bacteria), Thalassospira, Thalassospira xiamenensis	Predicted	1 out of 5	CAUTION: The sequence shown here is derived from an EMBL/GenBank/DDBJ whole genome shotgun (WGS) entry which is preliminary data. {ECO:0000313|EMBL:PTB98515.1}.	Coiled coil (1); Non-terminal residue (2)	PYVO01000472;				2018-07-18	2018-09-12
A0A2T4E215	NZ_LONH01000058.1:2101-5394	99.3	284	2	0	1	852	1	284	2e-160	575.5	A0A2T4E215	A0A2T4E215_9PROT	unreviewed	Endonuclease (Fragment)	C9975_09415	Thalassospira xiamenensis	284	unreviewed	220697	cellular organisms, Bacteria, Proteobacteria, Alphaproteobacteria, Rhodospirillales, Rhodospirillaceae (purple nonsulfur bacteria), Thalassospira, Thalassospira xiamenensis	Predicted	1 out of 5	CAUTION: The sequence shown here is derived from an EMBL/GenBank/DDBJ whole genome shotgun (WGS) entry which is preliminary data. {ECO:0000313|EMBL:PTC00090.1}.	Domain (1); Non-terminal residue (1)	PYVO01000328;				2018-07-18	2018-09-12
A0A2T4E254	NZ_PWDA01000069.1:588-2776	97.72	351	8	0	1845	793	1	351	1e-192	682.2	A0A2T4E254	A0A2T4E254_9PROT	unreviewed	Endonuclease (Fragment)	C9975_09255	Thalassospira xiamenensis	351	unreviewed	220697	cellular organisms, Bacteria, Proteobacteria, Alphaproteobacteria, Rhodospirillales, Rhodospirillaceae (purple nonsulfur bacteria), Thalassospira, Thalassospira xiamenensis	Predicted	1 out of 5	CAUTION: The sequence shown here is derived from an EMBL/GenBank/DDBJ whole genome shotgun (WGS) entry which is preliminary data. {ECO:0000313|EMBL:PTC00119.1}.	Domain (1); Non-terminal residue (2)	PYVO01000309;				2018-07-18	2018-09-12
A0A2U2BY76	NZ_CMHG01000050.1:5-174	100	56	0	0	2	169	11	66	4e-25	120.9	A0A2U2BY76	A0A2U2BY76_9PROT	unreviewed	Uncharacterized protein (Fragment)	DF188_10040	Arcobacter skirrowii	105	unreviewed	28200	cellular organisms, Bacteria, Proteobacteria, delta/epsilon subdivisions, Epsilonproteobacteria, Campylobacterales, Campylobacteraceae, Arcobacter, Arcobacter skirrowii	Predicted	1 out of 5	CAUTION: The sequence shown here is derived from an EMBL/GenBank/DDBJ whole genome shotgun (WGS) entry which is preliminary data. {ECO:0000313|EMBL:PWE19123.1}.	Non-terminal residue (1)	QEYI01000032;				2018-07-18	2018-10-10
A0A2U2BY91	NZ_CKJX01000039.1:152-326	100	53	0	0	1	159	12	64	3e-24	117.9	A0A2U2BY91	A0A2U2BY91_9PROT	unreviewed	Uncharacterized protein (Fragment)	DF188_10045	Arcobacter skirrowii	64	unreviewed	28200	cellular organisms, Bacteria, Proteobacteria, delta/epsilon subdivisions, Epsilonproteobacteria, Campylobacterales, Campylobacteraceae, Arcobacter, Arcobacter skirrowii	Predicted	1 out of 5	CAUTION: The sequence shown here is derived from an EMBL/GenBank/DDBJ whole genome shotgun (WGS) entry which is preliminary data. {ECO:0000313|EMBL:PWE19124.1}.	Non-terminal residue (1)	QEYI01000032;				2018-07-18	2018-10-10
A0A2U2BYC4	NZ_QEYI01000017.1:69-3362	100	1098	0	0	1	3294	1	1098	0	2212.6	A0A2U2BYC4	A0A2U2BYC4_9PROT	unreviewed	Endonuclease	DF188_09940	Arcobacter skirrowii	1257	unreviewed	28200	cellular organisms, Bacteria, Proteobacteria, delta/epsilon subdivisions, Epsilonproteobacteria, Campylobacterales, Campylobacteraceae, Arcobacter, Arcobacter skirrowii	Predicted	1 out of 5	CAUTION: The sequence shown here is derived from an EMBL/GenBank/DDBJ whole genome shotgun (WGS) entry which is preliminary data. {ECO:0000313|EMBL:PWE19353.1}.	Coiled coil (1); Domain (1)	QEYI01000017;				2018-07-18	2018-10-10
A0A2U2NDT2	NZ_QFFO01001542.1:1-222	100	73	0	0	221	3	4	76	1e-38	166	A0A2U2NDT2	A0A2U2NDT2_9ENTR	unreviewed	Uncharacterized protein (Fragment)	DEM28_30045	Enterobacter mori	76	unreviewed	539813	cellular organisms, Bacteria, Proteobacteria, Gammaproteobacteria, Enterobacterales, Enterobacteriaceae, Enterobacter, Enterobacter mori	Predicted	1 out of 5	CAUTION: The sequence shown here is derived from an EMBL/GenBank/DDBJ whole genome shotgun (WGS) entry which is preliminary data. {ECO:0000313|EMBL:PWG67154.1}.	Non-terminal residue (2)	QFFO01001542;				2018-07-18	2018-09-12
A0A2U2NEL9	NZ_QFFO01000990.1:86-254	100	53	0	0	1	159	19	71	3e-23	114.8	A0A2U2NEL9	A0A2U2NEL9_9ENTR	unreviewed	Uncharacterized protein	DEM28_27675	Enterobacter mori	71	unreviewed	539813	cellular organisms, Bacteria, Proteobacteria, Gammaproteobacteria, Enterobacterales, Enterobacteriaceae, Enterobacter, Enterobacter mori	Predicted	1 out of 5	CAUTION: The sequence shown here is derived from an EMBL/GenBank/DDBJ whole genome shotgun (WGS) entry which is preliminary data. {ECO:0000313|EMBL:PWG67601.1}.		QFFO01000990;				2018-07-18	2018-09-12
A0A2U2NH81	NZ_QFFO01000129.1:1-398	100	109	0	0	70	396	1	109	8e-64	250	A0A2U2NH81	A0A2U2NH81_9ENTR	unreviewed	Uncharacterized protein (Fragment)	DEM28_23900	Enterobacter mori	110	unreviewed	539813	cellular organisms, Bacteria, Proteobacteria, Gammaproteobacteria, Enterobacterales, Enterobacteriaceae, Enterobacter, Enterobacter mori	Predicted	1 out of 5	CAUTION: The sequence shown here is derived from an EMBL/GenBank/DDBJ whole genome shotgun (WGS) entry which is preliminary data. {ECO:0000313|EMBL:PWG68511.1}.	Non-terminal residue (1)	QFFO01000129;				2018-07-18	2018-09-12
A0A2U2NHL7	NZ_QFFO01000093.1:1-312	100	88	0	0	311	48	4	91	3e-33	148.3	A0A2U2NHL7	A0A2U2NHL7_9ENTR	unreviewed	Uncharacterized protein (Fragment)	DEM28_23725	Enterobacter mori	91	unreviewed	539813	cellular organisms, Bacteria, Proteobacteria, Gammaproteobacteria, Enterobacterales, Enterobacteriaceae, Enterobacter, Enterobacter mori	Predicted	1 out of 5	CAUTION: The sequence shown here is derived from an EMBL/GenBank/DDBJ whole genome shotgun (WGS) entry which is preliminary data. {ECO:0000313|EMBL:PWG68568.1}.	Domain (1); Non-terminal residue (1)	QFFO01000093;				2018-07-18	2018-09-12
A0A2U2P054	NZ_ALQK01000043.1:644-2603	97.78	90	2	0	549	280	1	90	2e-45	192.6	A0A2U2P054	A0A2U2P054_ENTHR	unreviewed	Uncharacterized protein (Fragment)	DF186_15975	Enterococcus hirae	90	unreviewed	1354	cellular organisms, Bacteria, Terrabacteria group, Firmicutes, Bacilli, Lactobacillales, Enterococcaceae, Enterococcus, Enterococcus hirae	Predicted	1 out of 5	CAUTION: The sequence shown here is derived from an EMBL/GenBank/DDBJ whole genome shotgun (WGS) entry which is preliminary data. {ECO:0000313|EMBL:PWG74806.1}.	Non-terminal residue (2)	QFFP01000908;				2018-07-18	2018-09-12
A0A2U2P1S5	NZ_APII01000020.1:1-664	96.55	116	4	0	86	433	1	116	1e-57	230.3	A0A2U2P1S5	A0A2U2P1S5_ENTHR	unreviewed	Endonuclease (Fragment)	DF186_14315	Enterococcus hirae	116	unreviewed	1354	cellular organisms, Bacteria, Terrabacteria group, Firmicutes, Bacilli, Lactobacillales, Enterococcaceae, Enterococcus, Enterococcus hirae	Predicted	1 out of 5	CAUTION: The sequence shown here is derived from an EMBL/GenBank/DDBJ whole genome shotgun (WGS) entry which is preliminary data. {ECO:0000313|EMBL:PWG75119.1}.	Coiled coil (1); Non-terminal residue (2)	QFFP01000269;				2018-07-18	2018-09-12
A0A2U2VW71	NZ_QEMY01001431.1:1-247	100	71	0	0	3	215	1	71	2e-31	142.1	A0A2U2VW71	A0A2U2VW71_9STRE	unreviewed	Uncharacterized protein (Fragment)	DB729_14320	Streptococcus sp. VT-4	71	unreviewed	2172545	cellular organisms, Bacteria, Terrabacteria group, Firmicutes, Bacilli, Lactobacillales, Streptococcaceae, Streptococcus, Streptococcus sp. VT-4	Predicted	1 out of 5	CAUTION: The sequence shown here is derived from an EMBL/GenBank/DDBJ whole genome shotgun (WGS) entry which is preliminary data. {ECO:0000313|EMBL:PWH67521.1}.	Non-terminal residue (1)	QEMY01001431;				2018-07-18	2018-09-12
A0A2U2VW81	NZ_QEMY01001410.1:81-247	100	39	0	0	1	117	27	65	2e-14	85.1	A0A2U2VW81	A0A2U2VW81_9STRE	unreviewed	Uncharacterized protein (Fragment)	DB729_14225	Streptococcus sp. VT-4	65	unreviewed	2172545	cellular organisms, Bacteria, Terrabacteria group, Firmicutes, Bacilli, Lactobacillales, Streptococcaceae, Streptococcus, Streptococcus sp. VT-4	Predicted	1 out of 5	CAUTION: The sequence shown here is derived from an EMBL/GenBank/DDBJ whole genome shotgun (WGS) entry which is preliminary data. {ECO:0000313|EMBL:PWH67536.1}.	Non-terminal residue (1)	QEMY01001410;				2018-07-18	2018-09-12
A0A2U2VW93	NZ_QEMY01001396.1:5-219	100	56	0	0	2	169	2	57	2e-25	122.1	A0A2U2VW93	A0A2U2VW93_9STRE	unreviewed	Uncharacterized protein (Fragment)	DB729_14185	Streptococcus sp. VT-4	75	unreviewed	2172545	cellular organisms, Bacteria, Terrabacteria group, Firmicutes, Bacilli, Lactobacillales, Streptococcaceae, Streptococcus, Streptococcus sp. VT-4	Predicted	1 out of 5	CAUTION: The sequence shown here is derived from an EMBL/GenBank/DDBJ whole genome shotgun (WGS) entry which is preliminary data. {ECO:0000313|EMBL:PWH67543.1}.	Non-terminal residue (1)	QEMY01001396;				2018-07-18	2018-09-12
A0A2U2VWE2	NZ_QEMY01001321.1:1-252	100	72	0	0	1	216	1	72	1e-35	156.4	A0A2U2VWE2	A0A2U2VWE2_9STRE	unreviewed	Uncharacterized protein (Fragment)	DB729_13915	Streptococcus sp. VT-4	72	unreviewed	2172545	cellular organisms, Bacteria, Terrabacteria group, Firmicutes, Bacilli, Lactobacillales, Streptococcaceae, Streptococcus, Streptococcus sp. VT-4	Predicted	1 out of 5	CAUTION: The sequence shown here is derived from an EMBL/GenBank/DDBJ whole genome shotgun (WGS) entry which is preliminary data. {ECO:0000313|EMBL:PWH67591.1}.	Non-terminal residue (1)	QEMY01001321;				2018-07-18	2018-09-12
A0A2U2VWG6	NZ_PJAI01000113.1:102-277	100	33	0	0	75	173	1	33	1e-11	76.3	A0A2U2VWG6	A0A2U2VWG6_9STRE	unreviewed	Uncharacterized protein	DB729_13735	Streptococcus sp. VT-4	65	unreviewed	2172545	cellular organisms, Bacteria, Terrabacteria group, Firmicutes, Bacilli, Lactobacillales, Streptococcaceae, Streptococcus, Streptococcus sp. VT-4	Predicted	1 out of 5	CAUTION: The sequence shown here is derived from an EMBL/GenBank/DDBJ whole genome shotgun (WGS) entry which is preliminary data. {ECO:0000313|EMBL:PWH67625.1}.		QEMY01001274;				2018-07-18	2018-09-12
A0A2U2VWH7	NZ_FWYR01000098.1:64-261	100	30	0	0	198	109	56	85	1e-08	66.2	A0A2U2VWH7	A0A2U2VWH7_9STRE	unreviewed	Uncharacterized protein	DB729_13650	Streptococcus sp. VT-4	85	unreviewed	2172545	cellular organisms, Bacteria, Terrabacteria group, Firmicutes, Bacilli, Lactobacillales, Streptococcaceae, Streptococcus, Streptococcus sp. VT-4	Predicted	1 out of 5	CAUTION: The sequence shown here is derived from an EMBL/GenBank/DDBJ whole genome shotgun (WGS) entry which is preliminary data. {ECO:0000313|EMBL:PWH67639.1}.		QEMY01001250;				2018-07-18	2018-09-12
A0A2U2VWI6	NZ_QEMY01001236.1:2-252	98.67	75	1	0	225	1	1	75	1e-33	149.4	A0A2U2VWI6	A0A2U2VWI6_9STRE	unreviewed	Uncharacterized protein (Fragment)	DB729_13595	Streptococcus sp. VT-4	75	unreviewed	2172545	cellular organisms, Bacteria, Terrabacteria group, Firmicutes, Bacilli, Lactobacillales, Streptococcaceae, Streptococcus, Streptococcus sp. VT-4	Predicted	1 out of 5	CAUTION: The sequence shown here is derived from an EMBL/GenBank/DDBJ whole genome shotgun (WGS) entry which is preliminary data. {ECO:0000313|EMBL:PWH67649.1}.	Chain (1); Non-terminal residue (1); Signal peptide (1)	QEMY01001236;				2018-07-18	2018-09-12
A0A2U2VWJ0	NZ_QEMY01001252.1:115-251	100	30	0	0	1	90	39	68	3e-08	64.7	A0A2U2VWJ0	A0A2U2VWJ0_9STRE	unreviewed	Uncharacterized protein (Fragment)	DB729_13655	Streptococcus sp. VT-4	68	unreviewed	2172545	cellular organisms, Bacteria, Terrabacteria group, Firmicutes, Bacilli, Lactobacillales, Streptococcaceae, Streptococcus, Streptococcus sp. VT-4	Predicted	1 out of 5	CAUTION: The sequence shown here is derived from an EMBL/GenBank/DDBJ whole genome shotgun (WGS) entry which is preliminary data. {ECO:0000313|EMBL:PWH67638.1}.	Non-terminal residue (1)	QEMY01001252;				2018-07-18	2018-09-12
A0A2U2VWK1	NZ_QEMY01001218.1:96-233	100	30	0	0	90	1	17	46	5e-09	67.4	A0A2U2VWK1	A0A2U2VWK1_9STRE	unreviewed	Uncharacterized protein (Fragment)	DB729_13520	Streptococcus sp. VT-4	77	unreviewed	2172545	cellular organisms, Bacteria, Terrabacteria group, Firmicutes, Bacilli, Lactobacillales, Streptococcaceae, Streptococcus, Streptococcus sp. VT-4	Predicted	1 out of 5	CAUTION: The sequence shown here is derived from an EMBL/GenBank/DDBJ whole genome shotgun (WGS) entry which is preliminary data. {ECO:0000313|EMBL:PWH67664.1}.	Coiled coil (1); Non-terminal residue (2)	QEMY01001218;				2018-07-18	2018-09-12
A0A2U2VX09	NZ_QEMY01001061.1:80-394	100	34	0	0	1	102	27	60	4e-13	81.6	A0A2U2VX09	A0A2U2VX09_9STRE	unreviewed	Uncharacterized protein (Fragment)	DB729_12730	Streptococcus sp. VT-4	60	unreviewed	2172545	cellular organisms, Bacteria, Terrabacteria group, Firmicutes, Bacilli, Lactobacillales, Streptococcaceae, Streptococcus, Streptococcus sp. VT-4	Predicted	1 out of 5	CAUTION: The sequence shown here is derived from an EMBL/GenBank/DDBJ whole genome shotgun (WGS) entry which is preliminary data. {ECO:0000313|EMBL:PWH67816.1}.	Non-terminal residue (1)	QEMY01001061;				2018-07-18	2018-09-12
A0A2U2VX18	NZ_QEMY01001030.1:1-262	100	86	0	0	260	3	3	88	3e-35	154.8	A0A2U2VX18	A0A2U2VX18_9STRE	unreviewed	Uncharacterized protein (Fragment)	DB729_12630	Streptococcus sp. VT-4	88	unreviewed	2172545	cellular organisms, Bacteria, Terrabacteria group, Firmicutes, Bacilli, Lactobacillales, Streptococcaceae, Streptococcus, Streptococcus sp. VT-4	Predicted	1 out of 5	CAUTION: The sequence shown here is derived from an EMBL/GenBank/DDBJ whole genome shotgun (WGS) entry which is preliminary data. {ECO:0000313|EMBL:PWH67834.1}.	Non-terminal residue (1)	QEMY01001030;				2018-07-18	2018-09-12
A0A2U2VX77	NZ_QEMY01000949.1:35-344	98.77	81	1	0	66	308	1	81	8e-37	160.2	A0A2U2VX77	A0A2U2VX77_9STRE	unreviewed	Uncharacterized protein	DB729_12350	Streptococcus sp. VT-4	86	unreviewed	2172545	cellular organisms, Bacteria, Terrabacteria group, Firmicutes, Bacilli, Lactobacillales, Streptococcaceae, Streptococcus, Streptococcus sp. VT-4	Predicted	1 out of 5	CAUTION: The sequence shown here is derived from an EMBL/GenBank/DDBJ whole genome shotgun (WGS) entry which is preliminary data. {ECO:0000313|EMBL:PWH67886.1}.		QEMY01000949;				2018-07-18	2018-09-12
A0A2U2VX96	NZ_QEMY01000921.1:88-314	100	39	0	0	3	119	30	68	1e-14	86.7	A0A2U2VX96	A0A2U2VX96_9STRE	unreviewed	Uncharacterized protein (Fragment)	DB729_12240	Streptococcus sp. VT-4	68	unreviewed	2172545	cellular organisms, Bacteria, Terrabacteria group, Firmicutes, Bacilli, Lactobacillales, Streptococcaceae, Streptococcus, Streptococcus sp. VT-4	Predicted	1 out of 5	CAUTION: The sequence shown here is derived from an EMBL/GenBank/DDBJ whole genome shotgun (WGS) entry which is preliminary data. {ECO:0000313|EMBL:PWH67906.1}.	Non-terminal residue (1)	QEMY01000921;				2018-07-18	2018-09-12
A0A2U2VXA9	NZ_PYPZ01000306.1:282-511	98.46	65	1	0	16	210	16	80	2e-28	132.5	A0A2U2VXA9	A0A2U2VXA9_9STRE	unreviewed	Uncharacterized protein (Fragment)	DB729_12170	Streptococcus sp. VT-4	80	unreviewed	2172545	cellular organisms, Bacteria, Terrabacteria group, Firmicutes, Bacilli, Lactobacillales, Streptococcaceae, Streptococcus, Streptococcus sp. VT-4	Predicted	1 out of 5	CAUTION: The sequence shown here is derived from an EMBL/GenBank/DDBJ whole genome shotgun (WGS) entry which is preliminary data. {ECO:0000313|EMBL:PWH67919.1}.	Non-terminal residue (1)	QEMY01000896;				2018-07-18	2018-09-12
A0A2U2VXC9	NZ_QEMY01000879.1:82-312	100	77	0	0	1	231	28	104	4e-38	164.5	A0A2U2VXC9	A0A2U2VXC9_9STRE	unreviewed	Uncharacterized protein (Fragment)	DB729_12100	Streptococcus sp. VT-4	104	unreviewed	2172545	cellular organisms, Bacteria, Terrabacteria group, Firmicutes, Bacilli, Lactobacillales, Streptococcaceae, Streptococcus, Streptococcus sp. VT-4	Predicted	1 out of 5	CAUTION: The sequence shown here is derived from an EMBL/GenBank/DDBJ whole genome shotgun (WGS) entry which is preliminary data. {ECO:0000313|EMBL:PWH67933.1}.	Non-terminal residue (2)	QEMY01000879;				2018-07-18	2018-09-12
A0A2U2VXD6	NZ_QEMY01000855.1:77-279	100	49	0	0	3	149	27	75	9e-21	106.7	A0A2U2VXD6	A0A2U2VXD6_9STRE	unreviewed	Uncharacterized protein (Fragment)	DB729_12015	Streptococcus sp. VT-4	78	unreviewed	2172545	cellular organisms, Bacteria, Terrabacteria group, Firmicutes, Bacilli, Lactobacillales, Streptococcaceae, Streptococcus, Streptococcus sp. VT-4	Predicted	1 out of 5	CAUTION: The sequence shown here is derived from an EMBL/GenBank/DDBJ whole genome shotgun (WGS) entry which is preliminary data. {ECO:0000313|EMBL:PWH67946.1}.	Non-terminal residue (1)	QEMY01000855;				2018-07-18	2018-09-12
A0A2U2VXE7	NZ_QEMY01000843.1:32-307	100	91	0	0	273	1	1	91	8e-46	189.9	A0A2U2VXE7	A0A2U2VXE7_9STRE	unreviewed	Uncharacterized protein (Fragment)	DB729_11965	Streptococcus sp. VT-4	101	unreviewed	2172545	cellular organisms, Bacteria, Terrabacteria group, Firmicutes, Bacilli, Lactobacillales, Streptococcaceae, Streptococcus, Streptococcus sp. VT-4	Predicted	1 out of 5	CAUTION: The sequence shown here is derived from an EMBL/GenBank/DDBJ whole genome shotgun (WGS) entry which is preliminary data. {ECO:0000313|EMBL:PWH67956.1}.	Non-terminal residue (1)	QEMY01000843;				2018-07-18	2018-09-12
A0A2U2VXF0	NZ_AACK01000131.1:1-104	100	30	0	0	104	15	39	68	2e-08	65.5	A0A2U2VXF0	A0A2U2VXF0_9STRE	unreviewed	Uncharacterized protein	DB729_11975	Streptococcus sp. VT-4	68	unreviewed	2172545	cellular organisms, Bacteria, Terrabacteria group, Firmicutes, Bacilli, Lactobacillales, Streptococcaceae, Streptococcus, Streptococcus sp. VT-4	Predicted	1 out of 5	CAUTION: The sequence shown here is derived from an EMBL/GenBank/DDBJ whole genome shotgun (WGS) entry which is preliminary data. {ECO:0000313|EMBL:PWH67953.1}.		QEMY01000845;	WP_050389094.1;			2018-07-18	2018-10-10
A0A2U2VXF1	NZ_QEMY01000832.1:79-392	96.43	28	1	0	116	33	1	28	2e-08	66.2	A0A2U2VXF1	A0A2U2VXF1_9STRE	unreviewed	Uncharacterized protein (Fragment)	DB729_11920	Streptococcus sp. VT-4	65	unreviewed	2172545	cellular organisms, Bacteria, Terrabacteria group, Firmicutes, Bacilli, Lactobacillales, Streptococcaceae, Streptococcus, Streptococcus sp. VT-4	Predicted	1 out of 5	CAUTION: The sequence shown here is derived from an EMBL/GenBank/DDBJ whole genome shotgun (WGS) entry which is preliminary data. {ECO:0000313|EMBL:PWH67965.1}.	Non-terminal residue (1)	QEMY01000832;				2018-07-18	2018-09-12
A0A2U2VXH0	NZ_QEMY01000816.1:1-247	100	62	0	0	2	187	1	62	6e-28	130.6	A0A2U2VXH0	A0A2U2VXH0_9STRE	unreviewed	Uncharacterized protein (Fragment)	DB729_11860	Streptococcus sp. VT-4	62	unreviewed	2172545	cellular organisms, Bacteria, Terrabacteria group, Firmicutes, Bacilli, Lactobacillales, Streptococcaceae, Streptococcus, Streptococcus sp. VT-4	Predicted	1 out of 5	CAUTION: The sequence shown here is derived from an EMBL/GenBank/DDBJ whole genome shotgun (WGS) entry which is preliminary data. {ECO:0000313|EMBL:PWH67977.1}.	Non-terminal residue (1)	QEMY01000816;				2018-07-18	2018-09-12
A0A2U2VXH6	NZ_CMKS01000044.1:8415-8735	100	30	0	0	321	232	39	68	6e-10	70.9	A0A2U2VXH6	A0A2U2VXH6_9STRE	unreviewed	Uncharacterized protein (Fragment)	DB729_11765	Streptococcus sp. VT-4	68	unreviewed	2172545	cellular organisms, Bacteria, Terrabacteria group, Firmicutes, Bacilli, Lactobacillales, Streptococcaceae, Streptococcus, Streptococcus sp. VT-4	Predicted	1 out of 5	CAUTION: The sequence shown here is derived from an EMBL/GenBank/DDBJ whole genome shotgun (WGS) entry which is preliminary data. {ECO:0000313|EMBL:PWH67994.1}.	Coiled coil (1); Non-terminal residue (1)	QEMY01000791;				2018-07-18	2018-09-12
A0A2U2VXI2	NZ_QEMY01000789.1:95-352	100	53	0	0	1	159	32	84	1e-23	115.9	A0A2U2VXI2	A0A2U2VXI2_9STRE	unreviewed	Uncharacterized protein (Fragment)	DB729_11760	Streptococcus sp. VT-4	84	unreviewed	2172545	cellular organisms, Bacteria, Terrabacteria group, Firmicutes, Bacilli, Lactobacillales, Streptococcaceae, Streptococcus, Streptococcus sp. VT-4	Predicted	1 out of 5	CAUTION: The sequence shown here is derived from an EMBL/GenBank/DDBJ whole genome shotgun (WGS) entry which is preliminary data. {ECO:0000313|EMBL:PWH67995.1}.	Non-terminal residue (1)	QEMY01000789;				2018-07-18	2018-09-12
A0A2U2VXK3	NZ_QEMY01000823.1:1-259	100	85	0	0	3	257	1	85	2e-43	181.8	A0A2U2VXK3	A0A2U2VXK3_9STRE	unreviewed	Uncharacterized protein (Fragment)	DB729_11885	Streptococcus sp. VT-4	86	unreviewed	2172545	cellular organisms, Bacteria, Terrabacteria group, Firmicutes, Bacilli, Lactobacillales, Streptococcaceae, Streptococcus, Streptococcus sp. VT-4	Predicted	1 out of 5	CAUTION: The sequence shown here is derived from an EMBL/GenBank/DDBJ whole genome shotgun (WGS) entry which is preliminary data. {ECO:0000313|EMBL:PWH67972.1}.	Non-terminal residue (2)	QEMY01000823;				2018-07-18	2018-09-12
A0A2U2VZM2	NZ_QEMY01000705.1:1-240	100	65	0	0	2	196	1	65	9e-32	143.3	A0A2U2VZM2	A0A2U2VZM2_9STRE	unreviewed	Uncharacterized protein (Fragment)	DB729_07920	Streptococcus sp. VT-4	65	unreviewed	2172545	cellular organisms, Bacteria, Terrabacteria group, Firmicutes, Bacilli, Lactobacillales, Streptococcaceae, Streptococcus, Streptococcus sp. VT-4	Predicted	1 out of 5	CAUTION: The sequence shown here is derived from an EMBL/GenBank/DDBJ whole genome shotgun (WGS) entry which is preliminary data. {ECO:0000313|EMBL:PWH68728.1}.	Non-terminal residue (1)	QEMY01000705;				2018-07-18	2018-09-12
A0A2U2VZM7	NZ_QEMY01000697.1:177-434	100	32	0	0	98	3	1	32	4e-08	64.7	A0A2U2VZM7	A0A2U2VZM7_9STRE	unreviewed	Uncharacterized protein (Fragment)	DB729_07890	Streptococcus sp. VT-4	91	unreviewed	2172545	cellular organisms, Bacteria, Terrabacteria group, Firmicutes, Bacilli, Lactobacillales, Streptococcaceae, Streptococcus, Streptococcus sp. VT-4	Predicted	1 out of 5	CAUTION: The sequence shown here is derived from an EMBL/GenBank/DDBJ whole genome shotgun (WGS) entry which is preliminary data. {ECO:0000313|EMBL:PWH68734.1}.	Non-terminal residue (1)	QEMY01000697;				2018-07-18	2018-09-12
A0A2U2VZN4	NZ_QEMY01000684.1:6-329	98.67	75	1	0	243	19	1	75	7e-35	153.7	A0A2U2VZN4	A0A2U2VZN4_9STRE	unreviewed	Uncharacterized protein	DB729_07830	Streptococcus sp. VT-4	75	unreviewed	2172545	cellular organisms, Bacteria, Terrabacteria group, Firmicutes, Bacilli, Lactobacillales, Streptococcaceae, Streptococcus, Streptococcus sp. VT-4	Predicted	1 out of 5	CAUTION: The sequence shown here is derived from an EMBL/GenBank/DDBJ whole genome shotgun (WGS) entry which is preliminary data. {ECO:0000313|EMBL:PWH68745.1}.		QEMY01000684;				2018-07-18	2018-09-12
A0A2U2VZR5	NZ_QEMY01000632.1:1-237	100	64	0	0	2	193	1	64	1e-30	139.4	A0A2U2VZR5	A0A2U2VZR5_9STRE	unreviewed	Uncharacterized protein (Fragment)	DB729_07660	Streptococcus sp. VT-4	64	unreviewed	2172545	cellular organisms, Bacteria, Terrabacteria group, Firmicutes, Bacilli, Lactobacillales, Streptococcaceae, Streptococcus, Streptococcus sp. VT-4	Predicted	1 out of 5	CAUTION: The sequence shown here is derived from an EMBL/GenBank/DDBJ whole genome shotgun (WGS) entry which is preliminary data. {ECO:0000313|EMBL:PWH68777.1}.	Non-terminal residue (1)	QEMY01000632;				2018-07-18	2018-09-12
A0A2U2VZU1	NZ_QEMY01000611.1:98-238	100	39	0	0	1	117	33	71	2e-16	92	A0A2U2VZU1	A0A2U2VZU1_9STRE	unreviewed	Uncharacterized protein (Fragment)	DB729_07565	Streptococcus sp. VT-4	71	unreviewed	2172545	cellular organisms, Bacteria, Terrabacteria group, Firmicutes, Bacilli, Lactobacillales, Streptococcaceae, Streptococcus, Streptococcus sp. VT-4	Predicted	1 out of 5	CAUTION: The sequence shown here is derived from an EMBL/GenBank/DDBJ whole genome shotgun (WGS) entry which is preliminary data. {ECO:0000313|EMBL:PWH68793.1}.	Non-terminal residue (1)	QEMY01000611;				2018-07-18	2018-09-12
A0A2U2VZY4	NZ_QEMY01000591.1:71-237	100	49	0	0	1	147	24	72	5e-20	104	A0A2U2VZY4	A0A2U2VZY4_9STRE	unreviewed	Uncharacterized protein (Fragment)	DB729_07380	Streptococcus sp. VT-4	72	unreviewed	2172545	cellular organisms, Bacteria, Terrabacteria group, Firmicutes, Bacilli, Lactobacillales, Streptococcaceae, Streptococcus, Streptococcus sp. VT-4	Predicted	1 out of 5	CAUTION: The sequence shown here is derived from an EMBL/GenBank/DDBJ whole genome shotgun (WGS) entry which is preliminary data. {ECO:0000313|EMBL:PWH68829.1}.	Non-terminal residue (1)	QEMY01000591;				2018-07-18	2018-09-12
A0A2U2W021	NZ_QEMY01000601.1:116-236	100	30	0	0	1	90	39	68	2e-09	68.6	A0A2U2W021	A0A2U2W021_9STRE	unreviewed	Uncharacterized protein (Fragment)	DB729_07415	Streptococcus sp. VT-4	68	unreviewed	2172545	cellular organisms, Bacteria, Terrabacteria group, Firmicutes, Bacilli, Lactobacillales, Streptococcaceae, Streptococcus, Streptococcus sp. VT-4	Predicted	1 out of 5	CAUTION: The sequence shown here is derived from an EMBL/GenBank/DDBJ whole genome shotgun (WGS) entry which is preliminary data. {ECO:0000313|EMBL:PWH68822.1}.	Non-terminal residue (1)	QEMY01000601;				2018-07-18	2018-09-12
A0A2U2W0H6	NZ_QEMY01000490.1:2-236	100	72	0	0	2	217	1	72	1e-34	152.9	A0A2U2W0H6	A0A2U2W0H6_9STRE	unreviewed	Uncharacterized protein (Fragment)	DB729_06310	Streptococcus sp. VT-4	72	unreviewed	2172545	cellular organisms, Bacteria, Terrabacteria group, Firmicutes, Bacilli, Lactobacillales, Streptococcaceae, Streptococcus, Streptococcus sp. VT-4	Predicted	1 out of 5	CAUTION: The sequence shown here is derived from an EMBL/GenBank/DDBJ whole genome shotgun (WGS) entry which is preliminary data. {ECO:0000313|EMBL:PWH69028.1}.	Non-terminal residue (1)	QEMY01000490;				2018-07-18	2018-09-12
A0A2U2W0I4	NZ_QEMY01000484.1:1-247	100	61	0	0	2	184	1	61	3e-19	101.7	A0A2U2W0I4	A0A2U2W0I4_9STRE	unreviewed	Uncharacterized protein (Fragment)	DB729_06285	Streptococcus sp. VT-4	61	unreviewed	2172545	cellular organisms, Bacteria, Terrabacteria group, Firmicutes, Bacilli, Lactobacillales, Streptococcaceae, Streptococcus, Streptococcus sp. VT-4	Predicted	1 out of 5	CAUTION: The sequence shown here is derived from an EMBL/GenBank/DDBJ whole genome shotgun (WGS) entry which is preliminary data. {ECO:0000313|EMBL:PWH69033.1}.	Non-terminal residue (1)	QEMY01000484;				2018-07-18	2018-09-12
A0A2U2W0I7	NZ_QEMY01000450.1:1-154	100	50	0	0	3	152	1	50	3e-20	104.8	A0A2U2W0I7	A0A2U2W0I7_9STRE	unreviewed	Uncharacterized protein (Fragment)	DB729_06195	Streptococcus sp. VT-4	92	unreviewed	2172545	cellular organisms, Bacteria, Terrabacteria group, Firmicutes, Bacilli, Lactobacillales, Streptococcaceae, Streptococcus, Streptococcus sp. VT-4	Predicted	1 out of 5	CAUTION: The sequence shown here is derived from an EMBL/GenBank/DDBJ whole genome shotgun (WGS) entry which is preliminary data. {ECO:0000313|EMBL:PWH69051.1}.	Non-terminal residue (2)	QEMY01000450;				2018-07-18	2018-09-12
A0A2U2W0K0	NZ_QEMY01000525.1:91-242	100	30	0	0	1	90	31	60	2e-08	65.9	A0A2U2W0K0	A0A2U2W0K0_9STRE	unreviewed	Uncharacterized protein (Fragment)	DB729_06440	Streptococcus sp. VT-4	60	unreviewed	2172545	cellular organisms, Bacteria, Terrabacteria group, Firmicutes, Bacilli, Lactobacillales, Streptococcaceae, Streptococcus, Streptococcus sp. VT-4	Predicted	1 out of 5	CAUTION: The sequence shown here is derived from an EMBL/GenBank/DDBJ whole genome shotgun (WGS) entry which is preliminary data. {ECO:0000313|EMBL:PWH69002.1}.	Non-terminal residue (1)	QEMY01000525;				2018-07-18	2018-09-12
A0A2U2W2P2	NZ_LZSH01000161.1:559-742	96.72	61	2	0	183	1	11	76	1e-31	142.9	A0A2U2W2P2	A0A2U2W2P2_9STRE	unreviewed	Uncharacterized protein	DB729_02250	Streptococcus sp. VT-4	135	unreviewed	2172545	cellular organisms, Bacteria, Terrabacteria group, Firmicutes, Bacilli, Lactobacillales, Streptococcaceae, Streptococcus, Streptococcus sp. VT-4	Predicted	1 out of 5	CAUTION: The sequence shown here is derived from an EMBL/GenBank/DDBJ whole genome shotgun (WGS) entry which is preliminary data. {ECO:0000313|EMBL:PWH69806.1}.		QEMY01000363;				2018-07-18	2018-09-12
A0A2U2W395	NZ_QEMY01000283.1:1-214	100	70	0	0	3	212	1	70	4e-31	141	A0A2U2W395	A0A2U2W395_9STRE	unreviewed	Uncharacterized protein (Fragment)	DB729_01200	Streptococcus sp. VT-4	75	unreviewed	2172545	cellular organisms, Bacteria, Terrabacteria group, Firmicutes, Bacilli, Lactobacillales, Streptococcaceae, Streptococcus, Streptococcus sp. VT-4	Predicted	1 out of 5	CAUTION: The sequence shown here is derived from an EMBL/GenBank/DDBJ whole genome shotgun (WGS) entry which is preliminary data. {ECO:0000313|EMBL:PWH70006.1}.	Non-terminal residue (1)	QEMY01000283;				2018-07-18	2018-09-12
A0A2U2W3A6	NZ_QEMY01000293.1:49-267	100	66	0	0	3	200	9	74	6e-31	140.6	A0A2U2W3A6	A0A2U2W3A6_9STRE	unreviewed	Uncharacterized protein	DB729_01225	Streptococcus sp. VT-4	74	unreviewed	2172545	cellular organisms, Bacteria, Terrabacteria group, Firmicutes, Bacilli, Lactobacillales, Streptococcaceae, Streptococcus, Streptococcus sp. VT-4	Predicted	1 out of 5	CAUTION: The sequence shown here is derived from an EMBL/GenBank/DDBJ whole genome shotgun (WGS) entry which is preliminary data. {ECO:0000313|EMBL:PWH70001.1}.		QEMY01000293;				2018-07-18	2018-09-12
A0A2U2W3H2	NZ_QEMY01000244.1:47-325	100	75	0	0	1	225	16	90	2e-39	169.1	A0A2U2W3H2	A0A2U2W3H2_9STRE	unreviewed	Uncharacterized protein (Fragment)	DB729_00760	Streptococcus sp. VT-4	90	unreviewed	2172545	cellular organisms, Bacteria, Terrabacteria group, Firmicutes, Bacilli, Lactobacillales, Streptococcaceae, Streptococcus, Streptococcus sp. VT-4	Predicted	1 out of 5	CAUTION: The sequence shown here is derived from an EMBL/GenBank/DDBJ whole genome shotgun (WGS) entry which is preliminary data. {ECO:0000313|EMBL:PWH70086.1}.	Non-terminal residue (1)	QEMY01000244;				2018-07-18	2018-09-12
A0A2U2W3I1	NZ_QEMY01000227.1:1-221	100	73	0	0	3	221	1	73	2e-34	151.8	A0A2U2W3I1	A0A2U2W3I1_9STRE	unreviewed	Uncharacterized protein (Fragment)	DB729_00700	Streptococcus sp. VT-4	77	unreviewed	2172545	cellular organisms, Bacteria, Terrabacteria group, Firmicutes, Bacilli, Lactobacillales, Streptococcaceae, Streptococcus, Streptococcus sp. VT-4	Predicted	1 out of 5	CAUTION: The sequence shown here is derived from an EMBL/GenBank/DDBJ whole genome shotgun (WGS) entry which is preliminary data. {ECO:0000313|EMBL:PWH70097.1}.	Non-terminal residue (1)	QEMY01000227;				2018-07-18	2018-09-12
A0A2U2W3L3	NZ_QEMY01000167.1:1-229	100	75	0	0	3	227	1	75	1e-35	156.4	A0A2U2W3L3	A0A2U2W3L3_9STRE	unreviewed	Uncharacterized protein (Fragment)	DB729_00500	Streptococcus sp. VT-4	76	unreviewed	2172545	cellular organisms, Bacteria, Terrabacteria group, Firmicutes, Bacilli, Lactobacillales, Streptococcaceae, Streptococcus, Streptococcus sp. VT-4	Predicted	1 out of 5	CAUTION: The sequence shown here is derived from an EMBL/GenBank/DDBJ whole genome shotgun (WGS) entry which is preliminary data. {ECO:0000313|EMBL:PWH70134.1}.	Non-terminal residue (2)	QEMY01000167;				2018-07-18	2018-09-12
A0A2U2W3M6	NZ_QEMY01000173.1:1-239	100	69	0	0	3	209	1	69	5e-32	144.1	A0A2U2W3M6	A0A2U2W3M6_9STRE	unreviewed	Uncharacterized protein (Fragment)	DB729_00525	Streptococcus sp. VT-4	69	unreviewed	2172545	cellular organisms, Bacteria, Terrabacteria group, Firmicutes, Bacilli, Lactobacillales, Streptococcaceae, Streptococcus, Streptococcus sp. VT-4	Predicted	1 out of 5	CAUTION: The sequence shown here is derived from an EMBL/GenBank/DDBJ whole genome shotgun (WGS) entry which is preliminary data. {ECO:0000313|EMBL:PWH70129.1}.	Non-terminal residue (1)	QEMY01000173;				2018-07-18	2018-09-12
A0A2U2W3M7	NZ_QEMY01000154.1:44-237	100	54	0	0	31	192	25	78	1e-22	112.8	A0A2U2W3M7	A0A2U2W3M7_9STRE	unreviewed	Uncharacterized protein (Fragment)	DB729_00470	Streptococcus sp. VT-4	78	unreviewed	2172545	cellular organisms, Bacteria, Terrabacteria group, Firmicutes, Bacilli, Lactobacillales, Streptococcaceae, Streptococcus, Streptococcus sp. VT-4	Predicted	1 out of 5	CAUTION: The sequence shown here is derived from an EMBL/GenBank/DDBJ whole genome shotgun (WGS) entry which is preliminary data. {ECO:0000313|EMBL:PWH70140.1}.	Non-terminal residue (2); Transmembrane (1)	QEMY01000154;				2018-07-18	2018-09-12
A0A2U2W3Q1	NZ_KL476634.1:99-298	100	59	0	0	23	199	2	60	9e-31	139.8	A0A2U2W3Q1	A0A2U2W3Q1_9STRE	unreviewed	Uncharacterized protein	DB729_00340	Streptococcus sp. VT-4	72	unreviewed	2172545	cellular organisms, Bacteria, Terrabacteria group, Firmicutes, Bacilli, Lactobacillales, Streptococcaceae, Streptococcus, Streptococcus sp. VT-4	Predicted	1 out of 5	CAUTION: The sequence shown here is derived from an EMBL/GenBank/DDBJ whole genome shotgun (WGS) entry which is preliminary data. {ECO:0000313|EMBL:PWH70165.1}.		QEMY01000114;				2018-07-18	2018-09-12
A0A2U2W3Q2	NZ_QEMY01000111.1:68-235	100	55	0	0	167	3	1	55	3e-22	111.3	A0A2U2W3Q2	A0A2U2W3Q2_9STRE	unreviewed	Uncharacterized protein (Fragment)	DB729_00325	Streptococcus sp. VT-4	78	unreviewed	2172545	cellular organisms, Bacteria, Terrabacteria group, Firmicutes, Bacilli, Lactobacillales, Streptococcaceae, Streptococcus, Streptococcus sp. VT-4	Predicted	1 out of 5	CAUTION: The sequence shown here is derived from an EMBL/GenBank/DDBJ whole genome shotgun (WGS) entry which is preliminary data. {ECO:0000313|EMBL:PWH70168.1}.	Non-terminal residue (2)	QEMY01000111;				2018-07-18	2018-09-12
A0A2U2W3S1	NZ_QEMY01000220.1:1-195	100	59	0	0	2	178	1	59	1e-26	126.3	A0A2U2W3S1	A0A2U2W3S1_9STRE	unreviewed	Uncharacterized protein (Fragment)	DB729_00675	Streptococcus sp. VT-4	59	unreviewed	2172545	cellular organisms, Bacteria, Terrabacteria group, Firmicutes, Bacilli, Lactobacillales, Streptococcaceae, Streptococcus, Streptococcus sp. VT-4	Predicted	1 out of 5	CAUTION: The sequence shown here is derived from an EMBL/GenBank/DDBJ whole genome shotgun (WGS) entry which is preliminary data. {ECO:0000313|EMBL:PWH70102.1}.	Non-terminal residue (1)	QEMY01000220;				2018-07-18	2018-09-12
A0A2U2W3Z2	NZ_QEMY01000049.1:1-232	100	66	0	0	198	1	1	66	3e-30	138.3	A0A2U2W3Z2	A0A2U2W3Z2_9STRE	unreviewed	Uncharacterized protein (Fragment)	DB729_00140	Streptococcus sp. VT-4	66	unreviewed	2172545	cellular organisms, Bacteria, Terrabacteria group, Firmicutes, Bacilli, Lactobacillales, Streptococcaceae, Streptococcus, Streptococcus sp. VT-4	Predicted	1 out of 5	CAUTION: The sequence shown here is derived from an EMBL/GenBank/DDBJ whole genome shotgun (WGS) entry which is preliminary data. {ECO:0000313|EMBL:PWH70202.1}.	Chain (1); Non-terminal residue (1); Signal peptide (1)	QEMY01000049;				2018-07-18	2018-09-12
A0A2V2KWK9	NZ_BFCK01000746.1:107-277	97.3	37	1	0	171	61	23	59	2e-14	85.1	A0A2V2KWK9	A0A2V2KWK9_ENTFC	unreviewed	Uncharacterized protein	DKX15_19130	Enterococcus faecium (Streptococcus faecium)	59	unreviewed	1352	cellular organisms, Bacteria, Terrabacteria group, Firmicutes, Bacilli, Lactobacillales, Enterococcaceae, Enterococcus, Enterococcus faecium (Streptococcus faecium)	Predicted	1 out of 5	CAUTION: The sequence shown here is derived from an EMBL/GenBank/DDBJ whole genome shotgun (WGS) entry which is preliminary data. {ECO:0000313|EMBL:PWQ88466.1}.		QGKP01001053;				2018-09-12	2018-09-12
A0A2V2KZ67	NZ_LYIQ01000099.1:620-2299	98.92	185	2	0	1185	631	1	185	8e-98	366.3	A0A2V2KZ67	A0A2V2KZ67_ENTFC	unreviewed	Endonuclease (Fragment)	DKX15_14550	Enterococcus faecium (Streptococcus faecium)	185	unreviewed	1352	cellular organisms, Bacteria, Terrabacteria group, Firmicutes, Bacilli, Lactobacillales, Enterococcaceae, Enterococcus, Enterococcus faecium (Streptococcus faecium)	Predicted	1 out of 5	CAUTION: The sequence shown here is derived from an EMBL/GenBank/DDBJ whole genome shotgun (WGS) entry which is preliminary data. {ECO:0000313|EMBL:PWQ89340.1}.	Non-terminal residue (2)	QGKP01000111;				2018-09-12	2018-09-12
A0A2V2KZ91	NZ_CGZQ01000049.1:5350-5515	100	55	0	0	165	1	21	75	9e-25	119.8	A0A2V2KZ91	A0A2V2KZ91_ENTFC	unreviewed	Uncharacterized protein	DKX15_14355	Enterococcus faecium (Streptococcus faecium)	93	unreviewed	1352	cellular organisms, Bacteria, Terrabacteria group, Firmicutes, Bacilli, Lactobacillales, Enterococcaceae, Enterococcus, Enterococcus faecium (Streptococcus faecium)	Predicted	1 out of 5	CAUTION: The sequence shown here is derived from an EMBL/GenBank/DDBJ whole genome shotgun (WGS) entry which is preliminary data. {ECO:0000313|EMBL:PWQ89370.1}.		QGKP01000087;				2018-09-12	2018-09-12
A0A2V2L3F1	NZ_QKVX01000015.1:741-904	100	54	0	0	2	163	22	75	5e-29	134	A0A2V2L3F1	A0A2V2L3F1_ENTFC	unreviewed	Uncharacterized protein (Fragment)	DKX15_14690	Enterococcus faecium (Streptococcus faecium)	78	unreviewed	1352	cellular organisms, Bacteria, Terrabacteria group, Firmicutes, Bacilli, Lactobacillales, Enterococcaceae, Enterococcus, Enterococcus faecium (Streptococcus faecium)	Predicted	1 out of 5	CAUTION: The sequence shown here is derived from an EMBL/GenBank/DDBJ whole genome shotgun (WGS) entry which is preliminary data. {ECO:0000313|EMBL:PWQ89315.1}.	Non-terminal residue (1)	QGKP01000137;				2018-09-12	2018-09-12
A0A2V2L6W2	NZ_LZSF01000266.1:234-403	98.21	56	1	0	1	168	40	95	4e-27	127.5	A0A2V2L6W2	A0A2V2L6W2_ENTFC	unreviewed	Uncharacterized protein	DKX15_14360	Enterococcus faecium (Streptococcus faecium)	163	unreviewed	1352	cellular organisms, Bacteria, Terrabacteria group, Firmicutes, Bacilli, Lactobacillales, Enterococcaceae, Enterococcus, Enterococcus faecium (Streptococcus faecium)	Predicted	1 out of 5	CAUTION: The sequence shown here is derived from an EMBL/GenBank/DDBJ whole genome shotgun (WGS) entry which is preliminary data. {ECO:0000313|EMBL:PWQ89371.1}.		QGKP01000087;				2018-09-12	2018-09-12
A0A2V2P5M2	NZ_BFCK01000605.1:1-253	100	30	0	0	44	133	22	51	2e-08	65.9	A0A2V2P5M2	A0A2V2P5M2_ENTFC	unreviewed	Uncharacterized protein (Fragment)	DKP78_24725	Enterococcus faecium (Streptococcus faecium)	61	unreviewed	1352	cellular organisms, Bacteria, Terrabacteria group, Firmicutes, Bacilli, Lactobacillales, Enterococcaceae, Enterococcus, Enterococcus faecium (Streptococcus faecium)	Predicted	1 out of 5	CAUTION: The sequence shown here is derived from an EMBL/GenBank/DDBJ whole genome shotgun (WGS) entry which is preliminary data. {ECO:0000313|EMBL:PWS21221.1}.	Non-terminal residue (1)	QGNU01003197;				2018-09-12	2018-09-12
A0A2V2PIR8	NZ_ALQR01000038.1:907-4200	96.63	89	3	0	751	1017	1	89	6e-41	178.7	A0A2V2PIR8	A0A2V2PIR8_ENTFC	unreviewed	Uncharacterized protein (Fragment)	DKP78_19830	Enterococcus faecium (Streptococcus faecium)	89	unreviewed	1352	cellular organisms, Bacteria, Terrabacteria group, Firmicutes, Bacilli, Lactobacillales, Enterococcaceae, Enterococcus, Enterococcus faecium (Streptococcus faecium)	Predicted	1 out of 5	CAUTION: The sequence shown here is derived from an EMBL/GenBank/DDBJ whole genome shotgun (WGS) entry which is preliminary data. {ECO:0000313|EMBL:PWS22163.1}.	Coiled coil (1); Non-terminal residue (2)	QGNU01001748;				2018-09-12	2018-10-10
A0A2W0PWR7	NZ_PQTZ01000125.1:15-183	100	56	0	0	2	169	6	61	3e-23	114.8	A0A2W0PWR7	A0A2W0PWR7_KLEPN		Deleted.															2018-09-12	2018-10-10
A0A2W2X7U0	NZ_PZRW01000029.1:4-591	98.28	58	1	0	414	587	1	58	4e-18	98.6	A0A2W2X7U0	A0A2W2X7U0_STAAU		Deleted.															2018-09-12	2018-10-10
A0A2W2X8A4	NZ_PZRW01000021.1:427-778	100	40	0	0	233	352	1	40	7e-17	94	A0A2W2X8A4	A0A2W2X8A4_STAAU		Deleted.															2018-09-12	2018-10-10
A0A2W2XLU8	NZ_CKYY01000039.1:3035-3202	98.21	56	1	0	1	168	7	62	1e-25	122.9	A0A2W2XLU8	A0A2W2XLU8_STAAU		Deleted.															2018-09-12	2018-10-10
A0A2W2XM10	NZ_KZ794899.1:444-612	97.96	49	1	0	21	167	1	49	8e-21	106.7	A0A2W2XM10	A0A2W2XM10_STAAU		Deleted.															2018-09-12	2018-10-10
A0A2W2Y6K8	NZ_PJAI01000113.1:102-277	100	34	0	0	75	176	1	34	2e-12	78.6	A0A2W2Y6K8	A0A2W2Y6K8_STAAU		Deleted.															2018-09-12	2018-10-10
A0A2W2YYI8	NZ_MPRK01000332.1:310-539	100	76	0	0	230	3	24	99	2e-41	175.6	A0A2W2YYI8	A0A2W2YYI8_STAAU		Deleted.															2018-09-12	2018-10-10
A0A2W2ZHZ3	NZ_AMRJ01000068.1:335-555	100	69	0	0	11	217	1	69	5e-33	147.5	A0A2W2ZHZ3	A0A2W2ZHZ3_STAAU		Deleted.															2018-09-12	2018-10-10
A0A2W3B941	NZ_PZSG01000136.1:288-1002	97.67	43	1	0	585	713	1	43	9e-16	91.7	A0A2W3B941	A0A2W3B941_STAAU		Deleted.															2018-09-12	2018-10-10
A0A2W3BY82	NZ_PZSG01000136.1:288-1002	100	89	0	0	326	592	1	89	1e-41	177.6	A0A2W3BY82	A0A2W3BY82_STAAU		Deleted.															2018-09-12	2018-10-10
A0A2W3DPR0	NZ_PZSG01000136.1:4-256	100	66	0	0	253	56	22	87	2e-31	142.1	A0A2W3DPR0	A0A2W3DPR0_STAAU		Deleted.															2018-09-12	2018-10-10
A0A2W3YP57	NZ_CQTE01000357.1:1-142	100	46	0	0	2	139	4	69	3e-19	101.7	A0A2W3YP57	A0A2W3YP57_STAAU		Deleted.															2018-09-12	2018-10-10
A0A2W3YPG4	NZ_FRWH01000198.1:176-411	98.51	67	1	0	222	22	1	67	2e-21	108.6	A0A2W3YPG4	A0A2W3YPG4_STAAU		Deleted.															2018-09-12	2018-10-10
A0A2W3ZN65	NZ_KL476634.1:341-537	98.46	65	1	0	1	195	8	72	4e-34	151	A0A2W3ZN65	A0A2W3ZN65_STAAU		Deleted.															2018-09-12	2018-10-10
A0A2W4B9Q8	NZ_PKSS01000104.1:259-438	100	57	0	0	178	8	38	94	4e-31	141	A0A2W4B9Q8	A0A2W4B9Q8_STAAU		Deleted.															2018-09-12	2018-10-10
A0A2W4B9U1	NZ_PKSS01000075.1:867-1066	100	27	0	0	1	81	61	87	3e-08	65.1	A0A2W4B9U1	A0A2W4B9U1_STAAU		Deleted.															2018-09-12	2018-10-10
A0A2W4D3B7	NZ_QKVY01000012.1:1-623	100	157	0	0	91	561	1	157	4e-92	344.7	A0A2W4D3B7	A0A2W4D3B7_SALDE		Deleted.															2018-09-12	2018-10-10
A0A2W4E7R0	NZ_CGZQ01000059.1:225-395	100	57	0	0	1	171	22	78	2e-24	119	A0A2W4E7R0	A0A2W4E7R0_SALDE		Deleted.															2018-09-12	2018-10-10
A0A2W4EQA3	NZ_JHBZ01000078.1:605-2153	96.69	121	4	0	753	391	1	121	8e-66	260	A0A2W4EQA3	A0A2W4EQA3_SALDE	unreviewed	Endonuclease (Fragment)	DOM01_27385	Salmonella derby	121	unreviewed	28144	cellular organisms, Bacteria, Proteobacteria, Gammaproteobacteria, Enterobacterales, Enterobacteriaceae, Salmonella, Salmonella choleraesuis, Salmonella enterica I, Salmonella derby	Predicted	1 out of 5	CAUTION: The sequence shown here is derived from an EMBL/GenBank/DDBJ whole genome shotgun (WGS) entry which is preliminary data. {ECO:0000313|EMBL:PZM40859.1}.	Non-terminal residue (2)	QKWC01000423;				2018-09-12	2018-10-10
A0A2W4EVA5	NZ_FRWH01000198.1:176-411	98.51	67	1	0	222	22	1	67	1e-21	109.4	A0A2W4EVA5	A0A2W4EVA5_SALDE		Deleted.															2018-09-12	2018-10-10
A0A2W4EVE7	NZ_QKVX01000001.1:1-726	100	157	0	0	516	46	1	157	4e-92	345.5	A0A2W4EVE7	A0A2W4EVE7_SALDE		Deleted.															2018-09-12	2018-10-10
A0A2W4EW45	NZ_JQOE01000046.1:1-168	96.43	56	2	0	168	1	22	77	1e-24	119.4	A0A2W4EW45	A0A2W4EW45_SALDE	unreviewed	Uncharacterized protein	DOM01_27515	Salmonella derby	96	unreviewed	28144	cellular organisms, Bacteria, Proteobacteria, Gammaproteobacteria, Enterobacterales, Enterobacteriaceae, Salmonella, Salmonella choleraesuis, Salmonella enterica I, Salmonella derby	Predicted	1 out of 5	CAUTION: The sequence shown here is derived from an EMBL/GenBank/DDBJ whole genome shotgun (WGS) entry which is preliminary data. {ECO:0000313|EMBL:PZM40835.1}.		QKWC01000444;				2018-09-12	2018-10-10
A0A2W4FFD5	NZ_ALQR01000038.1:907-4200	100	281	0	0	1897	2739	1	281	4e-157	564.7	A0A2W4FFD5	A0A2W4FFD5_SALDE		Deleted.															2018-09-12	2018-10-10
A0A2W4FFX0	NZ_JUHZ01000053.1:599-3892	98.73	314	4	0	3069	2128	1	314	1e-174	622.5	A0A2W4FFX0	A0A2W4FFX0_SALDE	unreviewed	Endonuclease (Fragment)	DOM01_02355	Salmonella derby	314	unreviewed	28144	cellular organisms, Bacteria, Proteobacteria, Gammaproteobacteria, Enterobacterales, Enterobacteriaceae, Salmonella, Salmonella choleraesuis, Salmonella enterica I, Salmonella derby	Predicted	1 out of 5	CAUTION: The sequence shown here is derived from an EMBL/GenBank/DDBJ whole genome shotgun (WGS) entry which is preliminary data. {ECO:0000313|EMBL:PZM50237.1}.	Coiled coil (1); Domain (1); Non-terminal residue (2)	QKWC01000388;				2018-09-12	2018-10-10
A0A2W4FI91	NZ_QKWA01000060.1:172-340	100	51	0	0	169	17	45	95	3e-21	108.2	A0A2W4FI91	A0A2W4FI91_SALDE		Deleted.															2018-09-12	2018-10-10
A0A2W4FJ23	NZ_ALQR01000038.1:907-4200	100	139	0	0	2065	2481	1	139	3e-70	276.2	A0A2W4FJ23	A0A2W4FJ23_SALDE	unreviewed	Endonuclease (Fragment)	DOM01_01515	Salmonella derby	139	unreviewed	28144	cellular organisms, Bacteria, Proteobacteria, Gammaproteobacteria, Enterobacterales, Enterobacteriaceae, Salmonella, Salmonella choleraesuis, Salmonella enterica I, Salmonella derby	Predicted	1 out of 5	CAUTION: The sequence shown here is derived from an EMBL/GenBank/DDBJ whole genome shotgun (WGS) entry which is preliminary data. {ECO:0000313|EMBL:PZM50411.1}.	Domain (1); Non-terminal residue (2)	QKWC01000240;				2018-09-12	2018-10-10
A0A2W4G1Q1	NZ_QKVX01000023.1:1-2055	100	684	0	0	2054	3	1	684	0	1375.9	A0A2W4G1Q1	A0A2W4G1Q1_SALDE		Deleted.															2018-09-12	2018-10-10
A0A2W4GPN7	NZ_QKVX01000015.1:741-904	100	54	0	0	2	163	22	75	5e-29	134	A0A2W4GPN7	A0A2W4GPN7_SALDE		Deleted.															2018-09-12	2018-10-10
A0A2W4H418	NZ_AKPL01000008.1:1-2797	100	105	0	0	1256	1570	1	105	3e-50	209.1	A0A2W4H418	A0A2W4H418_SALDE		Deleted.															2018-09-12	2018-10-10
A0A2W5QXD1	NZ_JPWZ01000242.1:124-287	100	54	0	0	2	163	19	72	4e-25	120.9	A0A2W5QXD1	A0A2W5QXD1_ACIJO	unreviewed	Uncharacterized protein	DI542_18400	Acinetobacter johnsonii	117	unreviewed	40214	cellular organisms, Bacteria, Proteobacteria, Gammaproteobacteria, Pseudomonadales, Moraxellaceae, Acinetobacter, Acinetobacter johnsonii	Predicted	1 out of 5	CAUTION: The sequence shown here is derived from an EMBL/GenBank/DDBJ whole genome shotgun (WGS) entry which is preliminary data. {ECO:0000313|EMBL:PZQ83241.1}.		QFQJ01000216;				2018-09-12	2018-10-10
A0A2W8NX88	NZ_QLDE01000087.1:1-672	99.44	177	1	0	141	671	1	177	3e-96	359	A0A2W8NX88	A0A2W8NX88_9BURK		Deleted.															2018-09-12	2018-10-10
A0A2W8P642	NZ_QLDE01000085.1:1-440	100	145	0	0	435	1	1	145	2e-82	312	A0A2W8P642	A0A2W8P642_9BURK		Deleted.															2018-09-12	2018-10-10
A0A2W8PVK6	NZ_AIOD01000141.1:1-543	100	74	0	0	431	210	1	74	2e-32	146.4	A0A2W8PVK6	A0A2W8PVK6_9BURK		Deleted.															2018-09-12	2018-10-10
A0A2W8T0H1	NZ_QLCQ01000240.1:1-291	100	97	0	0	291	1	1	97	2e-47	195.3	A0A2W8T0H1	A0A2W8T0H1_9BURK		Deleted.															2018-09-12	2018-10-10
A0A2W8T174	NZ_QLCQ01000246.1:1-297	100	98	0	0	2	295	1	98	9e-48	196.4	A0A2W8T174	A0A2W8T174_9BURK		Deleted.															2018-09-12	2018-10-10
A0A2W8USP0	NZ_AIOD01000164.1:1-396	100	78	0	0	242	9	1	78	3e-43	181.4	A0A2W8USP0	A0A2W8USP0_9BURK		Deleted.															2018-09-12	2018-10-10
A0A2W8V132	NZ_QLCH01000098.1:176-339	100	54	0	0	164	3	24	77	9e-23	113.2	A0A2W8V132	A0A2W8V132_9BURK		Deleted.															2018-09-12	2018-10-10
A0A2W8W7K0	NZ_CKCF01000050.1:1146-1296	96	50	2	0	2	151	35	84	3e-20	104.8	A0A2W8W7K0	A0A2W8W7K0_9BURK		Deleted.															2018-09-12	2018-10-10
A0A2W8X6W3	NZ_QLBY01000176.1:1-367	100	72	0	0	218	3	1	72	8e-39	166.8	A0A2W8X6W3	A0A2W8X6W3_9BURK		Deleted.															2018-09-12	2018-10-10
A0A2W8X718	NZ_QLAR01000085.1:64-454	100	104	0	0	78	389	1	104	4e-57	227.6	A0A2W8X718	A0A2W8X718_9BURK		Deleted.															2018-09-12	2018-10-10
A0A2W8X7L1	NZ_QLAR01000086.1:1-308	100	102	0	0	3	308	1	102	4e-52	211.1	A0A2W8X7L1	A0A2W8X7L1_9BURK		Deleted.															2018-09-12	2018-10-10
A0A2W8XCX0	NZ_QLAR01000087.1:1-334	100	80	0	0	272	33	1	80	3e-40	171.8	A0A2W8XCX0	A0A2W8XCX0_9BURK		Deleted.															2018-09-12	2018-10-10
A0A2W8XCZ2	NZ_QLAI01000100.1:1-358	100	118	0	0	3	356	1	118	1e-59	236.1	A0A2W8XCZ2	A0A2W8XCZ2_9BURK		Deleted.															2018-09-12	2018-10-10
A0A2W8YBP8	NZ_LYIQ01000099.1:620-2299	100	158	0	0	702	229	1	158	3e-91	344.7	A0A2W8YBP8	A0A2W8YBP8_9BURK		Deleted.															2018-09-12	2018-10-10
A0A2W8YF22	NZ_QLAV01000067.1:1-239	100	45	0	0	2	136	1	45	2e-16	92.4	A0A2W8YF22	A0A2W8YF22_9BURK		Deleted.															2018-09-12	2018-10-10
A0A2W8YSQ9	NZ_FWDR01000178.1:1-486	100	62	0	0	110	295	1	62	1e-31	143.3	A0A2W8YSQ9	A0A2W8YSQ9_9BURK		Deleted.															2018-09-12	2018-10-10
A0A2W8Z4R1	NZ_QLBC01000093.1:1-972	100	280	0	0	133	972	1	280	2e-156	560.1	A0A2W8Z4R1	A0A2W8Z4R1_9BURK		Deleted.															2018-09-12	2018-10-10
A0A2W8ZJU6	NZ_QLAT01000128.1:1-293	100	87	0	0	263	3	1	87	1e-47	196.1	A0A2W8ZJU6	A0A2W8ZJU6_9BURK		Deleted.															2018-09-12	2018-10-10
A0A2W8ZMH4	NZ_LEHF01000128.1:1-163	98.15	54	1	0	162	1	19	72	1e-22	112.5	A0A2W8ZMH4	A0A2W8ZMH4_9BURK		Deleted.															2018-09-12	2018-10-10
A0A2W9A099	NZ_QLBC01000094.1:1-353	100	79	0	0	352	116	2	80	6e-39	167.2	A0A2W9A099	A0A2W9A099_9BURK		Deleted.															2018-09-12	2018-10-10
A0A2W9ACW6	NZ_QLAP01000131.1:1-410	100	136	0	0	1	408	1	136	6e-79	300.1	A0A2W9ACW6	A0A2W9ACW6_9BURK		Deleted.															2018-09-12	2018-10-10
A0A2W9AIH4	NZ_QLAV01000125.1:1-428	100	142	0	0	427	2	1	142	8e-75	286.6	A0A2W9AIH4	A0A2W9AIH4_9BURK		Deleted.															2018-09-12	2018-10-10
A0A2W9BF81	NZ_QLAN01000188.1:1-302	100	68	0	0	34	237	1	68	2e-31	142.1	A0A2W9BF81	A0A2W9BF81_9BURK		Deleted.															2018-09-12	2018-10-10
A0A2W9BIE1	NZ_QLAN01000101.1:1-789	100	263	0	0	1	789	1	263	1e-154	553.5	A0A2W9BIE1	A0A2W9BIE1_9BURK		Deleted.															2018-09-12	2018-10-10
A0A2W9BL82	NZ_QLAI01000104.1:1-215	100	61	0	0	31	213	1	61	6e-31	140.6	A0A2W9BL82	A0A2W9BL82_9BURK		Deleted.															2018-09-12	2018-10-10
A0A2W9BM71	NZ_QLAI01000102.1:1-369	100	122	0	0	2	367	1	122	3e-63	248.1	A0A2W9BM71	A0A2W9BM71_9BURK		Deleted.															2018-09-12	2018-10-10
A0A2W9BMF8	NZ_QLAP01000149.1:1-369	100	122	0	0	368	3	1	122	3e-59	235	A0A2W9BMF8	A0A2W9BMF8_9BURK		Deleted.															2018-09-12	2018-10-10
A0A2W9BMI6	NZ_CMHG01000050.1:5-174	96.43	56	2	0	2	169	11	66	5e-23	114	A0A2W9BMI6	A0A2W9BMI6_9BURK		Deleted.															2018-09-12	2018-10-10
A0A2W9BML6	NZ_LYIQ01000099.1:620-2299	100	230	0	0	1497	808	1	230	7e-124	453	A0A2W9BML6	A0A2W9BML6_9BURK		Deleted.															2018-09-12	2018-10-10
A0A2W9BMN2	NZ_QLAP01000121.1:1-300	100	80	0	0	242	3	1	80	3e-40	171.4	A0A2W9BMN2	A0A2W9BMN2_9BURK		Deleted.															2018-09-12	2018-10-10
A0A2W9CDV0	NZ_QLAP01000146.1:1-581	100	193	0	0	1	579	1	193	3e-110	404.8	A0A2W9CDV0	A0A2W9CDV0_9BURK		Deleted.															2018-09-12	2018-10-10
A0A2W9DK57	NZ_QLAN01000102.1:85-854	100	157	0	0	693	223	1	157	4e-92	345.5	A0A2W9DK57	A0A2W9DK57_9BURK		Deleted.															2018-09-12	2018-10-10
A0A2W9DKK3	NZ_LXFS01000052.1:742-4035	100	121	0	0	1027	1389	1	121	7e-60	241.5	A0A2W9DKK3	A0A2W9DKK3_9BURK		Deleted.															2018-09-12	2018-10-10
A0A2W9F5F5	NZ_QLEA01000180.1:130-301	100	40	0	0	120	1	1	40	4e-15	87.8	A0A2W9F5F5	A0A2W9F5F5_9BURK		Deleted.															2018-09-12	2018-10-10
A0A2W9FH48	NZ_QLCX01000088.1:1-562	100	187	0	0	2	562	1	187	3e-109	401.4	A0A2W9FH48	A0A2W9FH48_9BURK		Deleted.															2018-09-12	2018-10-10
A0A2W9GDX7	NZ_QLCL01000133.1:1-242	100	80	0	0	3	242	1	80	4e-35	154.5	A0A2W9GDX7	A0A2W9GDX7_9BURK		Deleted.															2018-09-12	2018-10-10
A0A2W9I874	NZ_QLBX01000086.1:1-499	100	166	0	0	499	2	1	166	2e-86	325.1	A0A2W9I874	A0A2W9I874_9BURK		Deleted.															2018-09-12	2018-10-10
A0A2W9IFD1	NZ_QLCC01000083.1:1-662	100	157	0	0	46	516	1	157	3e-93	349	A0A2W9IFD1	A0A2W9IFD1_9BURK		Deleted.															2018-09-12	2018-10-10
A0A2W9JV96	NZ_FECI01000035.1:1-399	100	89	0	0	10	276	1	89	6e-48	197.2	A0A2W9JV96	A0A2W9JV96_9BURK		Deleted.															2018-09-12	2018-10-10
A0A2W9KD88	NZ_QLBN01000160.1:1-247	100	82	0	0	1	246	1	82	2e-38	165.6	A0A2W9KD88	A0A2W9KD88_9BURK		Deleted.															2018-09-12	2018-10-10
A0A2W9KVT0	NZ_AKPL01000008.1:1-2797	100	104	0	0	77	388	1	104	2e-53	219.9	A0A2W9KVT0	A0A2W9KVT0_9BURK		Deleted.															2018-09-12	2018-10-10
A0A2W9LEW8	NZ_QLAL01000156.1:103-600	100	96	0	0	211	498	1	96	2e-53	215.7	A0A2W9LEW8	A0A2W9LEW8_9BURK		Deleted.															2018-09-12	2018-10-10
A0A2W9MHS6	NZ_QLAZ01000118.1:1-476	100	158	0	0	475	2	1	158	2e-85	322	A0A2W9MHS6	A0A2W9MHS6_9BURK		Deleted.															2018-09-12	2018-10-10
A0A2W9MQ22	NZ_QLAL01000117.1:1-229	100	60	0	0	25	204	1	60	2e-27	128.6	A0A2W9MQ22	A0A2W9MQ22_9BURK		Deleted.															2018-09-12	2018-10-10
A0A2W9MT69	NZ_QLAO01000143.1:35-191	100	52	0	0	157	2	33	84	2e-23	115.5	A0A2W9MT69	A0A2W9MT69_9BURK		Deleted.															2018-09-12	2018-10-10
A0A2W9PU38	NZ_QLAU01000086.1:73-726	100	148	0	0	211	654	1	148	8e-87	327.4	A0A2W9PU38	A0A2W9PU38_9BURK		Deleted.															2018-09-12	2018-10-10
A0A2W9UP88	NZ_QLDV01000104.1:1-880	100	221	0	0	2	664	1	221	2e-120	439.9	A0A2W9UP88	A0A2W9UP88_9BURK		Deleted.															2018-09-12	2018-10-10
A0A2W9UPZ4	NZ_ALQR01000038.1:907-4200	98.63	73	1	0	1	219	1	73	4e-34	156	A0A2W9UPZ4	A0A2W9UPZ4_9BURK		Deleted.															2018-09-12	2018-10-10
A0A2W9V801	NZ_AIOD01000164.1:1-396	95.95	74	3	0	242	21	1	74	5e-38	164.1	A0A2W9V801	A0A2W9V801_9BURK	unreviewed	Uncharacterized protein (Fragment)	DN545_36075	Burkholderia multivorans	74	unreviewed	87883	cellular organisms, Bacteria, Proteobacteria, Betaproteobacteria, Burkholderiales, Burkholderiaceae, Burkholderia, Burkholderia cepacia complex, Burkholderia multivorans	Predicted	1 out of 5	CAUTION: The sequence shown here is derived from an EMBL/GenBank/DDBJ whole genome shotgun (WGS) entry which is preliminary data. {ECO:0000313|EMBL:RAF04291.1}.	Non-terminal residue (1)	QLBB01000969;				2018-09-12	2018-10-10
A0A2W9VEU0	NZ_QLDV01000101.1:1-799	100	265	0	0	797	3	1	265	3e-155	555.4	A0A2W9VEU0	A0A2W9VEU0_9BURK		Deleted.															2018-09-12	2018-10-10
A0A2W9WN60	NZ_JHDX01000029.1:1-909	95.24	126	6	0	384	7	2	127	2e-64	253.8	A0A2W9WN60	A0A2W9WN60_9BURK	unreviewed	Endonuclease (Fragment)	DN545_35870	Burkholderia multivorans	127	unreviewed	87883	cellular organisms, Bacteria, Proteobacteria, Betaproteobacteria, Burkholderiales, Burkholderiaceae, Burkholderia, Burkholderia cepacia complex, Burkholderia multivorans	Predicted	1 out of 5	CAUTION: The sequence shown here is derived from an EMBL/GenBank/DDBJ whole genome shotgun (WGS) entry which is preliminary data. {ECO:0000313|EMBL:RAF04945.1}.	Non-terminal residue (2)	QLBB01000929;				2018-09-12	2018-10-10
A0A2W9WRY0	NZ_JPWZ01000228.1:4-160	97.67	43	1	0	28	156	1	43	9e-17	93.2	A0A2W9WRY0	A0A2W9WRY0_9BURK	unreviewed	Uncharacterized protein (Fragment)	DN545_35325	Burkholderia multivorans	73	unreviewed	87883	cellular organisms, Bacteria, Proteobacteria, Betaproteobacteria, Burkholderiales, Burkholderiaceae, Burkholderia, Burkholderia cepacia complex, Burkholderia multivorans	Predicted	1 out of 5	CAUTION: The sequence shown here is derived from an EMBL/GenBank/DDBJ whole genome shotgun (WGS) entry which is preliminary data. {ECO:0000313|EMBL:RAF06160.1}.	Non-terminal residue (2)	QLBB01000828;				2018-09-12	2018-10-10
A0A2W9WS40	NZ_CANR01000100.1:1-1160	96.9	258	7	1	324	1097	1	257	1e-144	521.2	A0A2W9WS40	A0A2W9WS40_9BURK		Deleted.															2018-09-12	2018-10-10
A0A2W9WTA1	NZ_QLDQ01000063.1:1-723	100	241	0	0	1	723	1	241	4e-134	485	A0A2W9WTA1	A0A2W9WTA1_9BURK		Deleted.															2018-09-12	2018-10-10
A0A2W9YWP4	NZ_QLCK01000126.1:1-272	98.39	62	1	0	86	271	1	62	4e-28	131	A0A2W9YWP4	A0A2W9YWP4_9BURK		Deleted.															2018-09-12	2018-10-10
A0A2W9Z4V5	NZ_QLBE01000146.1:1-270	100	89	0	0	2	268	1	89	3e-43	181.4	A0A2W9Z4V5	A0A2W9Z4V5_9BURK		Deleted.															2018-09-12	2018-10-10
A0A2W9ZBJ8	NZ_QLBE01000143.1:1-343	100	80	0	0	42	281	1	80	3e-40	171.4	A0A2W9ZBJ8	A0A2W9ZBJ8_9BURK		Deleted.															2018-09-12	2018-10-10
A0A2W9ZVB7	NZ_QLBA01000193.1:1-402	100	134	0	0	1	402	1	134	1e-72	279.3	A0A2W9ZVB7	A0A2W9ZVB7_9BURK		Deleted.															2018-09-12	2018-10-10
A0A2X0A8Q2	NZ_QLCN01000196.1:1-1034	100	344	0	0	1033	2	1	344	1e-196	693.3	A0A2X0A8Q2	A0A2X0A8Q2_9BURK		Deleted.															2018-09-12	2018-10-10
A0A2X0BAC2	NZ_AIOD01000141.1:1-543	100	115	0	0	497	153	1	115	5e-58	231.1	A0A2X0BAC2	A0A2X0BAC2_9BURK		Deleted.															2018-09-12	2018-10-10
A0A2X0BG95	NZ_PDGC01000200.1:1-710	100	60	0	0	462	641	1	60	7e-27	128.6	A0A2X0BG95	A0A2X0BG95_9BURK		Deleted.															2018-09-12	2018-10-10
A0A2X0CKE7	NZ_QLAM01000156.1:1-346	100	73	0	0	128	346	1	73	1e-39	169.5	A0A2X0CKE7	A0A2X0CKE7_9BURK		Deleted.															2018-09-12	2018-10-10
A0A2X0CMR6	NZ_QLAY01000200.1:1-354	100	118	0	0	354	1	1	118	3e-62	244.6	A0A2X0CMR6	A0A2X0CMR6_9BURK		Deleted.															2018-09-12	2018-10-10
A0A2X0CNP9	NZ_QLAM01000161.1:1-251	100	83	0	0	251	3	1	83	3e-39	167.9	A0A2X0CNP9	A0A2X0CNP9_9BURK		Deleted.															2018-09-12	2018-10-10
A0A2X0CVY3	NZ_QLBD01000119.1:1-283	100	92	0	0	3	278	1	92	6e-43	180.3	A0A2X0CVY3	A0A2X0CVY3_9BURK		Deleted.															2018-09-12	2018-10-10
A0A2X0DZN0	NZ_QLBS01000090.1:1-402	100	134	0	0	1	402	1	134	3e-70	271.2	A0A2X0DZN0	A0A2X0DZN0_9BURK		Deleted.															2018-09-12	2018-10-10
A0A2X0FHM7	NZ_QLAX01000152.1:1-281	100	93	0	0	279	1	6	98	2e-53	214.9	A0A2X0FHM7	A0A2X0FHM7_9BURK		Deleted.															2018-09-12	2018-10-10
A0A2X0FIM4	NZ_QLAX01000160.1:1-381	100	92	0	0	363	88	1	92	2e-43	182.2	A0A2X0FIM4	A0A2X0FIM4_9BURK		Deleted.															2018-09-12	2018-10-10
A0A2X0H455	NZ_QLAX01000136.1:110-690	100	123	0	0	211	579	1	123	1e-72	280	A0A2X0H455	A0A2X0H455_9BURK		Deleted.															2018-09-12	2018-10-10
A0A2X0HCM5	NZ_QLDO01000234.1:1-503	100	167	0	0	1	501	1	167	2e-89	335.5	A0A2X0HCM5	A0A2X0HCM5_9BURK		Deleted.															2018-09-12	2018-10-10
A0A2X3L172	NZ_UBIZ01000010.1:310-480	97.62	42	1	0	126	1	1	42	3e-17	94.7	A0A2X3L172	A0A2X3L172_9ACTN	unreviewed	Uncharacterized protein	FMEAI12_1070001	Frankia sp. Ea1.12	82	unreviewed	573499	cellular organisms, Bacteria, Terrabacteria group, Actinobacteria, Actinobacteria (high G+C Gram-positive bacteria), Frankiales, Frankiaceae, Frankia, Frankia sp. Ea1.12	Predicted	1 out of 5			UBIZ01000010;				2018-09-12	2018-09-12
A0A2X3MWH9	NZ_UBIZ01000287.1:182-492	100	65	0	0	309	115	8	72	2e-29	135.6	A0A2X3MWH9	A0A2X3MWH9_9ACTN	unreviewed	Uncharacterized protein	FMEAI12_3570002	Frankia sp. Ea1.12	72	unreviewed	573499	cellular organisms, Bacteria, Terrabacteria group, Actinobacteria, Actinobacteria (high G+C Gram-positive bacteria), Frankiales, Frankiaceae, Frankia, Frankia sp. Ea1.12	Predicted	1 out of 5			UBIZ01000287;				2018-09-12	2018-09-12
A3J025	NZ_AAXW01000147.1:256-1175	100	227	0	0	920	240	151	377	5e-136	491.9	A3J025	A3J025_9CYAN	unreviewed	Uncharacterized protein (Fragment)	CY0110_00950	Cyanothece sp. CCY0110	377	unreviewed	391612	cellular organisms, Bacteria, Terrabacteria group, Cyanobacteria/Melainabacteria group, Cyanobacteria, Oscillatoriophycideae, Oscillatoriales, Cyanothecaceae, Cyanothece, Cyanothece sp. CCY0110	Predicted	1 out of 5	CAUTION: The sequence shown here is derived from an EMBL/GenBank/DDBJ whole genome shotgun (WGS) entry which is preliminary data. {ECO:0000313|EMBL:EAZ87922.1}.	Domain (1); Non-terminal residue (1)	AAXW01000147;				2007-04-03	2018-04-25
A3J030	NZ_AAXW01000149.1:126-292	100	49	0	0	158	12	1	49	4e-21	107.8	A3J030	A3J030_9CYAN	unreviewed	Uncharacterized protein	CY0110_00935	Cyanothece sp. CCY0110	49	unreviewed	391612	cellular organisms, Bacteria, Terrabacteria group, Cyanobacteria/Melainabacteria group, Cyanobacteria, Oscillatoriophycideae, Oscillatoriales, Cyanothecaceae, Cyanothece, Cyanothece sp. CCY0110	Predicted	1 out of 5	CAUTION: The sequence shown here is derived from an EMBL/GenBank/DDBJ whole genome shotgun (WGS) entry which is preliminary data. {ECO:0000313|EMBL:EAZ87916.1}.		AAXW01000149;				2007-04-03	2018-04-25
A3J031	NZ_AAXW01000149.1:841-1010	100	56	0	0	169	2	6	61	3e-26	124.8	A3J031	A3J031_9CYAN	unreviewed	Uncharacterized protein	CY0110_00940	Cyanothece sp. CCY0110	82	unreviewed	391612	cellular organisms, Bacteria, Terrabacteria group, Cyanobacteria/Melainabacteria group, Cyanobacteria, Oscillatoriophycideae, Oscillatoriales, Cyanothecaceae, Cyanothece, Cyanothece sp. CCY0110	Predicted	1 out of 5	CAUTION: The sequence shown here is derived from an EMBL/GenBank/DDBJ whole genome shotgun (WGS) entry which is preliminary data. {ECO:0000313|EMBL:EAZ87917.1}.		AAXW01000149;	WP_008278997.1;			2007-04-03	2018-04-25
A3J032	NZ_JPWZ01000241.1:397-569	97.78	45	1	0	135	1	1	45	8e-16	90.1	A3J032	A3J032_9CYAN	unreviewed	Uncharacterized protein (Fragment)	CY0110_00945	Cyanothece sp. CCY0110	56	unreviewed	391612	cellular organisms, Bacteria, Terrabacteria group, Cyanobacteria/Melainabacteria group, Cyanobacteria, Oscillatoriophycideae, Oscillatoriales, Cyanothecaceae, Cyanothece, Cyanothece sp. CCY0110	Predicted	1 out of 5	CAUTION: The sequence shown here is derived from an EMBL/GenBank/DDBJ whole genome shotgun (WGS) entry which is preliminary data. {ECO:0000313|EMBL:EAZ87918.1}.	Non-terminal residue (1)	AAXW01000149;				2007-04-03	2018-04-25
A7C793	NZ_AKPL01000008.1:1-2797	100	92	0	0	1286	1561	1	92	7e-42	181.4	A7C793	A7C793_9GAMM	unreviewed	Uncharacterized protein	BGP_6629	Beggiatoa sp. PS	95	unreviewed	422289	cellular organisms, Bacteria, Proteobacteria, Gammaproteobacteria, Thiotrichales, Thiotrichaceae, Beggiatoa, Beggiatoa sp. PS	Predicted	1 out of 5	CAUTION: The sequence shown here is derived from an EMBL/GenBank/DDBJ whole genome shotgun (WGS) entry which is preliminary data. {ECO:0000313|EMBL:EDN65341.1}.	Domain (1)	ABBZ01003675;				2007-09-11	2017-11-22
A7C7V1	NZ_ATPG01000103.1:129-850	98.04	51	1	0	546	698	1	51	1e-19	104.8	A7C7V1	A7C7V1_9GAMM	unreviewed	Uncharacterized protein	BGP_6678	Beggiatoa sp. PS	100	unreviewed	422289	cellular organisms, Bacteria, Proteobacteria, Gammaproteobacteria, Thiotrichales, Thiotrichaceae, Beggiatoa, Beggiatoa sp. PS	Predicted	1 out of 5	CAUTION: The sequence shown here is derived from an EMBL/GenBank/DDBJ whole genome shotgun (WGS) entry which is preliminary data. {ECO:0000313|EMBL:EDN65133.1}.	Domain (1)	ABBZ01004418;				2007-09-11	2018-09-12
C5EWZ0	NZ_DS990322.1:335-521	100	61	0	0	3	185	19	79	7e-28	130.2	C5EWZ0	C5EWZ0_9FIRM	unreviewed	Uncharacterized protein	CBFG_06246	Clostridiales bacterium 1_7_47FAA	80	unreviewed	457421	cellular organisms, Bacteria, Terrabacteria group, Firmicutes, Clostridia, Clostridiales, unclassified Clostridiales, unclassified Clostridiales (miscellaneous), Clostridiales bacterium 1_7_47FAA	Predicted	1 out of 5			DS990322;				2009-07-28	2018-02-28
C8C0R6	NZ_AMQV01000085.1:1-349	100	53	0	0	250	92	4	56	4e-24	117.9	C8C0R6	C8C0R6_9ZZZZ	unreviewed	Putative transposase		uncultured organism	334	unreviewed	155900	unclassified sequences, environmental samples, uncultured organism	Predicted	1 out of 5		Domain (1)	GQ343066;				2009-10-13	2018-02-28
D3A8R8	NZ_ACEO02000031.1:5-1145	98.84	86	1	0	345	88	1	86	3e-38	167.9	D3A8R8	D3A8R8_NEISU	unreviewed	Uncharacterized protein	NEISUBOT_05661	Neisseria subflava NJ9703	86	unreviewed	546268	cellular organisms, Bacteria, Proteobacteria, Betaproteobacteria, Neisseriales, Neisseriaceae, Neisseria, Neisseria subflava, Neisseria subflava NJ9703	Predicted	1 out of 5	CAUTION: The sequence shown here is derived from an EMBL/GenBank/DDBJ whole genome shotgun (WGS) entry which is preliminary data. {ECO:0000313|EMBL:EFC50915.1}.	Domain (1)	ACEO02000031;				2010-03-23	2018-02-28
D3A8R9	NZ_ACEO02000031.1:5-1145	100	193	0	0	1139	561	1	193	3e-96	360.5	D3A8R9	D3A8R9_NEISU	unreviewed	Uncharacterized protein (Fragment)	NEISUBOT_05662	Neisseria subflava NJ9703	193	unreviewed	546268	cellular organisms, Bacteria, Proteobacteria, Betaproteobacteria, Neisseriales, Neisseriaceae, Neisseria, Neisseria subflava, Neisseria subflava NJ9703	Predicted	1 out of 5	CAUTION: The sequence shown here is derived from an EMBL/GenBank/DDBJ whole genome shotgun (WGS) entry which is preliminary data. {ECO:0000313|EMBL:EFC50916.1}.	Domain (1); Non-terminal residue (1)	ACEO02000031;				2010-03-23	2017-11-22
D3A8S1	NZ_ACEO02000033.1:1-593	100	44	0	0	352	483	1	44	2e-16	93.2	D3A8S1	D3A8S1_NEISU	unreviewed	Uncharacterized protein	NEISUBOT_05664	Neisseria subflava NJ9703	44	unreviewed	546268	cellular organisms, Bacteria, Proteobacteria, Betaproteobacteria, Neisseriales, Neisseriaceae, Neisseria, Neisseria subflava, Neisseria subflava NJ9703	Predicted	1 out of 5	CAUTION: The sequence shown here is derived from an EMBL/GenBank/DDBJ whole genome shotgun (WGS) entry which is preliminary data. {ECO:0000313|EMBL:EFC50912.1}.	Domain (1)	ACEO02000033;				2010-03-23	2018-02-28
D3A8S5	NZ_ACEO02000036.1:6-716	98.92	93	1	0	281	3	1	93	2e-35	157.1	D3A8S5	D3A8S5_NEISU	unreviewed	Uncharacterized protein (Fragment)	NEISUBOT_05668	Neisseria subflava NJ9703	95	unreviewed	546268	cellular organisms, Bacteria, Proteobacteria, Betaproteobacteria, Neisseriales, Neisseriaceae, Neisseria, Neisseria subflava, Neisseria subflava NJ9703	Predicted	1 out of 5	CAUTION: The sequence shown here is derived from an EMBL/GenBank/DDBJ whole genome shotgun (WGS) entry which is preliminary data. {ECO:0000313|EMBL:EFC50908.1}.	Non-terminal residue (1)	ACEO02000036;				2010-03-23	2015-12-09
D3A8S6	NZ_ACEO02000036.1:6-716	100	70	0	0	710	501	1	70	5e-33	149.1	D3A8S6	D3A8S6_NEISU	unreviewed	Uncharacterized protein (Fragment)	NEISUBOT_05669	Neisseria subflava NJ9703	70	unreviewed	546268	cellular organisms, Bacteria, Proteobacteria, Betaproteobacteria, Neisseriales, Neisseriaceae, Neisseria, Neisseria subflava, Neisseria subflava NJ9703	Predicted	1 out of 5	CAUTION: The sequence shown here is derived from an EMBL/GenBank/DDBJ whole genome shotgun (WGS) entry which is preliminary data. {ECO:0000313|EMBL:EFC50909.1}.	Non-terminal residue (1)	ACEO02000036;				2010-03-23	2015-12-09
D4DRV0	NZ_ADBF01000107.1:287-541	98.78	82	1	0	8	253	1	82	6e-39	167.2	D4DRV0	D4DRV0_NEIEG	unreviewed	Uncharacterized protein (Fragment)	NEIELOOT_01793	Neisseria elongata subsp. glycolytica ATCC 29315	82	unreviewed	546263	cellular organisms, Bacteria, Proteobacteria, Betaproteobacteria, Neisseriales, Neisseriaceae, Neisseria, Neisseria elongata, Neisseria elongata subsp. glycolytica, Neisseria elongata subsp. glycolytica ATCC 29315	Predicted	1 out of 5	CAUTION: The sequence shown here is derived from an EMBL/GenBank/DDBJ whole genome shotgun (WGS) entry which is preliminary data. {ECO:0000313|EMBL:EFE49437.1}.	Non-terminal residue (1)	ADBF01000107;				2010-05-18	2015-12-09
D4DRV2	NZ_ADBF01000109.1:6-490	100	78	0	0	3	236	3	80	2e-36	159.5	D4DRV2	D4DRV2_NEIEG	unreviewed	Uncharacterized protein (Fragment)	NEIELOOT_01795	Neisseria elongata subsp. glycolytica ATCC 29315	80	unreviewed	546263	cellular organisms, Bacteria, Proteobacteria, Betaproteobacteria, Neisseriales, Neisseriaceae, Neisseria, Neisseria elongata, Neisseria elongata subsp. glycolytica, Neisseria elongata subsp. glycolytica ATCC 29315	Predicted	1 out of 5	CAUTION: The sequence shown here is derived from an EMBL/GenBank/DDBJ whole genome shotgun (WGS) entry which is preliminary data. {ECO:0000313|EMBL:EFE49434.1}.	Non-terminal residue (1)	ADBF01000109;				2010-05-18	2015-12-09
D4DSB9	NZ_ADBF01000212.1:1-527	100	78	0	0	3	236	1	78	9e-40	170.2	D4DSB9	D4DSB9_NEIEG	unreviewed	Uncharacterized protein (Fragment)	NEIELOOT_01963	Neisseria elongata subsp. glycolytica ATCC 29315	78	unreviewed	546263	cellular organisms, Bacteria, Proteobacteria, Betaproteobacteria, Neisseriales, Neisseriaceae, Neisseria, Neisseria elongata, Neisseria elongata subsp. glycolytica, Neisseria elongata subsp. glycolytica ATCC 29315	Predicted	1 out of 5	CAUTION: The sequence shown here is derived from an EMBL/GenBank/DDBJ whole genome shotgun (WGS) entry which is preliminary data. {ECO:0000313|EMBL:EFE49267.1}.	Non-terminal residue (1)	ADBF01000212;				2010-05-18	2015-12-09
E2PF55	NZ_ADBE01000051.1:1-812	100	117	0	0	351	1	1	117	8e-58	231.9	E2PF55	E2PF55_NEIPO	unreviewed	Uncharacterized protein (Fragment)	NEIPOLOT_01240	Neisseria polysaccharea ATCC 43768	117	unreviewed	546267	cellular organisms, Bacteria, Proteobacteria, Betaproteobacteria, Neisseriales, Neisseriaceae, Neisseria, Neisseria polysaccharea, Neisseria polysaccharea ATCC 43768	Predicted	1 out of 5	CAUTION: The sequence shown here is derived from an EMBL/GenBank/DDBJ whole genome shotgun (WGS) entry which is preliminary data. {ECO:0000313|EMBL:EFH22966.1}.	Coiled coil (1); Non-terminal residue (1)	ADBE01000051;				2010-11-30	2017-12-20
E2PF56	NZ_ADBE01000051.1:1-812	100	84	0	0	811	560	1	84	4e-39	169.9	E2PF56	E2PF56_NEIPO	unreviewed	Uncharacterized protein (Fragment)	NEIPOLOT_01241	Neisseria polysaccharea ATCC 43768	84	unreviewed	546267	cellular organisms, Bacteria, Proteobacteria, Betaproteobacteria, Neisseriales, Neisseriaceae, Neisseria, Neisseria polysaccharea, Neisseria polysaccharea ATCC 43768	Predicted	1 out of 5	CAUTION: The sequence shown here is derived from an EMBL/GenBank/DDBJ whole genome shotgun (WGS) entry which is preliminary data. {ECO:0000313|EMBL:EFH22967.1}.	Non-terminal residue (1)	ADBE01000051;				2010-11-30	2017-10-25
E2PF57	NZ_ADBE01000052.1:162-509	100	115	0	0	2	346	34	148	7e-59	233.4	E2PF57	E2PF57_NEIPO	unreviewed	Uncharacterized protein (Fragment)	NEIPOLOT_01242	Neisseria polysaccharea ATCC 43768	149	unreviewed	546267	cellular organisms, Bacteria, Proteobacteria, Betaproteobacteria, Neisseriales, Neisseriaceae, Neisseria, Neisseria polysaccharea, Neisseria polysaccharea ATCC 43768	Predicted	1 out of 5	CAUTION: The sequence shown here is derived from an EMBL/GenBank/DDBJ whole genome shotgun (WGS) entry which is preliminary data. {ECO:0000313|EMBL:EFH22965.1}.	Domain (1); Non-terminal residue (1)	ADBE01000052;				2010-11-30	2017-11-22
E2PFB3	NZ_ADBE01000057.1:1-290	98.36	61	1	0	73	255	1	61	8e-28	130.2	E2PFB3	E2PFB3_NEIPO	unreviewed	Uncharacterized protein	NEIPOLOT_01299	Neisseria polysaccharea ATCC 43768	61	unreviewed	546267	cellular organisms, Bacteria, Proteobacteria, Betaproteobacteria, Neisseriales, Neisseriaceae, Neisseria, Neisseria polysaccharea, Neisseria polysaccharea ATCC 43768	Predicted	1 out of 5	CAUTION: The sequence shown here is derived from an EMBL/GenBank/DDBJ whole genome shotgun (WGS) entry which is preliminary data. {ECO:0000313|EMBL:EFH22909.1}.		ADBE01000057;				2010-11-30	2018-02-28
E2PFK1	NZ_ADBE01000063.1:74-527	100	87	0	0	396	136	1	87	8e-41	173.7	E2PFK1	E2PFK1_NEIPO	unreviewed	Uncharacterized protein	NEIPOLOT_01388	Neisseria polysaccharea ATCC 43768	87	unreviewed	546267	cellular organisms, Bacteria, Proteobacteria, Betaproteobacteria, Neisseriales, Neisseriaceae, Neisseria, Neisseria polysaccharea, Neisseria polysaccharea ATCC 43768	Predicted	1 out of 5	CAUTION: The sequence shown here is derived from an EMBL/GenBank/DDBJ whole genome shotgun (WGS) entry which is preliminary data. {ECO:0000313|EMBL:EFH22821.1}.	Domain (1)	ADBE01000063;				2010-11-30	2018-02-28
E2PG05	NZ_ADBE01000069.1:16-474	98.55	69	1	0	137	343	1	69	3e-30	138.7	E2PG05	E2PG05_NEIPO	unreviewed	Uncharacterized protein	NEIPOLOT_01542	Neisseria polysaccharea ATCC 43768	69	unreviewed	546267	cellular organisms, Bacteria, Proteobacteria, Betaproteobacteria, Neisseriales, Neisseriaceae, Neisseria, Neisseria polysaccharea, Neisseria polysaccharea ATCC 43768	Predicted	1 out of 5	CAUTION: The sequence shown here is derived from an EMBL/GenBank/DDBJ whole genome shotgun (WGS) entry which is preliminary data. {ECO:0000313|EMBL:EFH22667.1}.		ADBE01000069;				2010-11-30	2018-09-12
E2PG55	NZ_ADBE01000075.1:261-549	100	40	0	0	168	287	1	40	8e-12	77	E2PG55	E2PG55_NEIPO	unreviewed	Uncharacterized protein (Fragment)	NEIPOLOT_01595	Neisseria polysaccharea ATCC 43768	41	unreviewed	546267	cellular organisms, Bacteria, Proteobacteria, Betaproteobacteria, Neisseriales, Neisseriaceae, Neisseria, Neisseria polysaccharea, Neisseria polysaccharea ATCC 43768	Predicted	1 out of 5	CAUTION: The sequence shown here is derived from an EMBL/GenBank/DDBJ whole genome shotgun (WGS) entry which is preliminary data. {ECO:0000313|EMBL:EFH22617.1}.	Chain (1); Non-terminal residue (1); Signal peptide (1)	ADBE01000075;				2010-11-30	2015-12-09
E2PG59	NZ_ADBE01000079.1:379-782	100	74	0	0	160	381	1	74	1e-34	152.9	E2PG59	E2PG59_NEIPO	unreviewed	Uncharacterized protein	NEIPOLOT_01600	Neisseria polysaccharea ATCC 43768	74	unreviewed	546267	cellular organisms, Bacteria, Proteobacteria, Betaproteobacteria, Neisseriales, Neisseriaceae, Neisseria, Neisseria polysaccharea, Neisseria polysaccharea ATCC 43768	Predicted	1 out of 5	CAUTION: The sequence shown here is derived from an EMBL/GenBank/DDBJ whole genome shotgun (WGS) entry which is preliminary data. {ECO:0000313|EMBL:EFH22613.1}.	Domain (1)	ADBE01000079;	WP_003752844.1;			2010-11-30	2018-02-28
E2PGT1	NZ_ADBE01000097.1:1-560	100	83	0	0	251	3	1	83	1e-41	176.4	E2PGT1	E2PGT1_NEIPO	unreviewed	Uncharacterized protein (Fragment)	NEIPOLOT_01833	Neisseria polysaccharea ATCC 43768	84	unreviewed	546267	cellular organisms, Bacteria, Proteobacteria, Betaproteobacteria, Neisseriales, Neisseriaceae, Neisseria, Neisseria polysaccharea, Neisseria polysaccharea ATCC 43768	Predicted	1 out of 5	CAUTION: The sequence shown here is derived from an EMBL/GenBank/DDBJ whole genome shotgun (WGS) entry which is preliminary data. {ECO:0000313|EMBL:EFH22391.1}.	Domain (1); Non-terminal residue (1)	ADBE01000097;				2010-11-30	2017-11-22
E2PH96	NZ_ADBE01000103.1:1-520	98.94	94	1	0	66	347	1	94	1e-47	196.4	E2PH96	E2PH96_NEIPO	unreviewed	Uncharacterized protein	NEIPOLOT_02001	Neisseria polysaccharea ATCC 43768	94	unreviewed	546267	cellular organisms, Bacteria, Proteobacteria, Betaproteobacteria, Neisseriales, Neisseriaceae, Neisseria, Neisseria polysaccharea, Neisseria polysaccharea ATCC 43768	Predicted	1 out of 5	CAUTION: The sequence shown here is derived from an EMBL/GenBank/DDBJ whole genome shotgun (WGS) entry which is preliminary data. {ECO:0000313|EMBL:EFH22225.1}.	Coiled coil (1)	ADBE01000103;	WP_003753704.1;			2010-11-30	2018-02-28
E2PH97	NZ_ADBE01000103.1:1-520	100	64	0	0	329	520	1	64	1e-31	143.3	E2PH97	E2PH97_NEIPO	unreviewed	Uncharacterized protein	NEIPOLOT_02002	Neisseria polysaccharea ATCC 43768	66	unreviewed	546267	cellular organisms, Bacteria, Proteobacteria, Betaproteobacteria, Neisseriales, Neisseriaceae, Neisseria, Neisseria polysaccharea, Neisseria polysaccharea ATCC 43768	Predicted	1 out of 5	CAUTION: The sequence shown here is derived from an EMBL/GenBank/DDBJ whole genome shotgun (WGS) entry which is preliminary data. {ECO:0000313|EMBL:EFH22226.1}.		ADBE01000103;	WP_003753705.1;			2010-11-30	2018-02-28
E2PHB4	NZ_ADBE01000108.1:3-593	100	180	0	0	591	52	1	180	1e-102	379.4	E2PHB4	E2PHB4_NEIPO	unreviewed	Uncharacterized protein (Fragment)	NEIPOLOT_02020	Neisseria polysaccharea ATCC 43768	180	unreviewed	546267	cellular organisms, Bacteria, Proteobacteria, Betaproteobacteria, Neisseriales, Neisseriaceae, Neisseria, Neisseria polysaccharea, Neisseria polysaccharea ATCC 43768	Predicted	1 out of 5	CAUTION: The sequence shown here is derived from an EMBL/GenBank/DDBJ whole genome shotgun (WGS) entry which is preliminary data. {ECO:0000313|EMBL:EFH22208.1}.	Non-terminal residue (1)	ADBE01000108;				2010-11-30	2018-02-28
E2PHV4	NZ_ADBE01000114.1:138-781	100	73	0	0	1	219	46	118	2e-33	150.2	E2PHV4	E2PHV4_NEIPO	unreviewed	Uncharacterized protein (Fragment)	NEIPOLOT_02212	Neisseria polysaccharea ATCC 43768	118	unreviewed	546267	cellular organisms, Bacteria, Proteobacteria, Betaproteobacteria, Neisseriales, Neisseriaceae, Neisseria, Neisseria polysaccharea, Neisseria polysaccharea ATCC 43768	Predicted	1 out of 5	CAUTION: The sequence shown here is derived from an EMBL/GenBank/DDBJ whole genome shotgun (WGS) entry which is preliminary data. {ECO:0000313|EMBL:EFH22016.1}.	Non-terminal residue (1)	ADBE01000114;				2010-11-30	2015-12-09
E2PHV5	NZ_ADBE01000114.1:138-781	100	63	0	0	242	430	1	63	9e-27	127.9	E2PHV5	E2PHV5_NEIPO	unreviewed	Uncharacterized protein	NEIPOLOT_02213	Neisseria polysaccharea ATCC 43768	63	unreviewed	546267	cellular organisms, Bacteria, Proteobacteria, Betaproteobacteria, Neisseriales, Neisseriaceae, Neisseria, Neisseria polysaccharea, Neisseria polysaccharea ATCC 43768	Predicted	1 out of 5	CAUTION: The sequence shown here is derived from an EMBL/GenBank/DDBJ whole genome shotgun (WGS) entry which is preliminary data. {ECO:0000313|EMBL:EFH22017.1}.		ADBE01000114;				2010-11-30	2018-02-28
E2PHV6	NZ_ADBE01000114.1:138-781	98.53	68	1	0	440	643	1	68	3e-32	146	E2PHV6	E2PHV6_NEIPO	unreviewed	Uncharacterized protein (Fragment)	NEIPOLOT_02214	Neisseria polysaccharea ATCC 43768	68	unreviewed	546267	cellular organisms, Bacteria, Proteobacteria, Betaproteobacteria, Neisseriales, Neisseriaceae, Neisseria, Neisseria polysaccharea, Neisseria polysaccharea ATCC 43768	Predicted	1 out of 5	CAUTION: The sequence shown here is derived from an EMBL/GenBank/DDBJ whole genome shotgun (WGS) entry which is preliminary data. {ECO:0000313|EMBL:EFH22018.1}.	Domain (1); Non-terminal residue (1)	ADBE01000114;				2010-11-30	2015-12-09
E2PHV7	NZ_ADBE01000115.1:14-599	100	96	0	0	208	495	5	100	4e-47	194.9	E2PHV7	E2PHV7_NEIPO	unreviewed	Uncharacterized protein	NEIPOLOT_02215	Neisseria polysaccharea ATCC 43768	100	unreviewed	546267	cellular organisms, Bacteria, Proteobacteria, Betaproteobacteria, Neisseriales, Neisseriaceae, Neisseria, Neisseria polysaccharea, Neisseria polysaccharea ATCC 43768	Predicted	1 out of 5	CAUTION: The sequence shown here is derived from an EMBL/GenBank/DDBJ whole genome shotgun (WGS) entry which is preliminary data. {ECO:0000313|EMBL:EFH22015.1}.	Domain (1)	ADBE01000115;				2010-11-30	2018-02-28
E2PHV9	NZ_ADBE01000118.1:2-506	100	168	0	0	2	505	1	168	2e-100	371.7	E2PHV9	E2PHV9_NEIPO	unreviewed	Uncharacterized protein (Fragment)	NEIPOLOT_02217	Neisseria polysaccharea ATCC 43768	183	unreviewed	546267	cellular organisms, Bacteria, Proteobacteria, Betaproteobacteria, Neisseriales, Neisseriaceae, Neisseria, Neisseria polysaccharea, Neisseria polysaccharea ATCC 43768	Predicted	1 out of 5	CAUTION: The sequence shown here is derived from an EMBL/GenBank/DDBJ whole genome shotgun (WGS) entry which is preliminary data. {ECO:0000313|EMBL:EFH22012.1}.	Domain (1); Non-terminal residue (1)	ADBE01000118;				2010-11-30	2015-12-09
E2PHW1	NZ_ADBE01000120.1:1-671	98.96	96	1	0	288	1	1	96	2e-46	193.4	E2PHW1	E2PHW1_NEIPO	unreviewed	Uncharacterized protein (Fragment)	NEIPOLOT_02219	Neisseria polysaccharea ATCC 43768	96	unreviewed	546267	cellular organisms, Bacteria, Proteobacteria, Betaproteobacteria, Neisseriales, Neisseriaceae, Neisseria, Neisseria polysaccharea, Neisseria polysaccharea ATCC 43768	Predicted	1 out of 5	CAUTION: The sequence shown here is derived from an EMBL/GenBank/DDBJ whole genome shotgun (WGS) entry which is preliminary data. {ECO:0000313|EMBL:EFH22010.1}.	Domain (1); Non-terminal residue (1)	ADBE01000120;				2010-11-30	2017-11-22
E2PHW2	NZ_ADBE01000120.1:1-671	100	127	0	0	671	291	1	127	1e-52	213.8	E2PHW2	E2PHW2_NEIPO	unreviewed	Uncharacterized protein (Fragment)	NEIPOLOT_02220	Neisseria polysaccharea ATCC 43768	127	unreviewed	546267	cellular organisms, Bacteria, Proteobacteria, Betaproteobacteria, Neisseriales, Neisseriaceae, Neisseria, Neisseria polysaccharea, Neisseria polysaccharea ATCC 43768	Predicted	1 out of 5	CAUTION: The sequence shown here is derived from an EMBL/GenBank/DDBJ whole genome shotgun (WGS) entry which is preliminary data. {ECO:0000313|EMBL:EFH22011.1}.	Non-terminal residue (1)	ADBE01000120;				2010-11-30	2018-02-28
[truncated: 162 more rows]

## Sheet: README
	Supplemental Table S6: Search results of identified contaminating sequences in bacterial and archaeal genomes against the UniprotKB/TrEMBL database (excluding Chordates)
	Column name	Example	Description
1	sseqid	A0A060BQU5	Query sequence name (contaminated stretch in a bacterial or archaeal genome)
2	qseqid	NZ_FPMS01000006.1:1-2235	Protein ID hit in the NCBI nr database with blastp
3	pident	97.41	blastp percent identity of hit
[truncated: 29 more rows]
